# Supplementary material for: Isobaric crosslinking mass spectrometry technology for studying conformational and structural changes in proteins and complexes
Source: eLife journal article supplement (doi:10.7554/elife.99809), 2024-09-18
Supplement: code1 [file elife-99809-code1-v1.zip]

## Sheet: test
index	Protein-protein	Crosslinkingsites	Xcorr	Da	ppm	spectrum	engine	xcorr	Xcorr_norm	expect	immonium1	ion1	dot1	connective1	peptide1	protein1	Unique_protein1	subunit1	realpep1	position1	immonium2	ion2	dot2	connective2	peptide2	protein2	Unique_protein2	subunit2	realpep2	position2	CN	Comments
TAF9	3	TAF9:55---TAF9:63	15.5087
				0	2.98423	JL120518_120518_rTFIID_50B.16654.16654.4	NP	15.5087	0.609669	1e-06	//18	31//100	9.5895	2.41176	R.YVTTILDDAK[1354.71]IYSSHAK.K	Q16594:55	1	TAF9	YVTTILDDAKIYSSHAK	55	//11	16//50	5.91925	2.05	K.K[2190.16]ATVDADDVR.L	Q16594:63	1	TAF9	KATVDADDVR	63
				0	-1.66517	JL120518_120518_rTFIID_50B.16641.16641.4	NP	13.6348	0.537425	7.97e-06	//18	27//100	9.0225	2.05882	R.YVTTILDDAK[1354.71]IYSSHAK.K	Q16594:55	1	TAF9	YVTTILDDAKIYSSHAK	55	//11	10//50	4.61225	1.5	K.K[2190.16]ATVDADDVR.L	Q16594:63	1	TAF9	KATVDADDVR	63
				0	1.74018	JL120518_120518_rTFIID_50B.16655.16655.5	NP	11.2602	0.450771	5.85e-06	1//18	22//132	6.44175	1.76471	R.YVTTILDDAK[1354.71]IYSSHAK.K	Q16594:55	1	TAF9	YVTTILDDAKIYSSHAK	55	2//11	13//62	4.8185	1.75	K.K[2190.16]ATVDADDVR.L	Q16594:63	1	TAF9	KATVDADDVR	63
				0	1.52946	JL120518_120518_rTFIID_70B.17872.17872.4	N	10.8193	0.405907		1//11	8//50	1.33175	0.6	K.K[2190.16]ATVDADDVR.L	Q16594:63	1	TAF9	KATVDADDVR	63	//18	22//100	9.4875	1.90625	R.YVTTILDDAK[1354.71]IYSSHAK.K	Q16594:55	1	TAF9	YVTTILDDAKIYSSHAK	55
				0	-1.1657	JL120518_120518_rTFIID_50B.16629.16629.5	NP	8.65575	0.350563	0.000114	//18	18//132	4.415	1.38235	R.YVTTILDDAK[1354.71]IYSSHAK.K	Q16594:55	1	TAF9	YVTTILDDAKIYSSHAK	55	1//11	9//62	4.24075	1.45	K.K[2190.16]ATVDADDVR.L	Q16594:63	1	TAF9	KATVDADDVR	63
				0	0.304781	JL120518_120518_rTFIID_70B.17564.17564.5	N	8.26625	0.279463		//11	8//62	3.536	1.4	K.K[2190.16]ATVDADDVR.L	Q16594:63	1	TAF9	KATVDADDVR	63	//18	17//132	4.73025	1.25	R.YVTTILDDAK[1354.71]IYSSHAK.K	Q16594:55	1	TAF9	YVTTILDDAKIYSSHAK	55
				0	0.111056	JL120518_120518_rTFIID_70B.17869.17869.5	N	7.6325	0.293586		//11	8//62	3.233	1.4	K.K[2190.16]ATVDADDVR.L	Q16594:63	1	TAF9	KATVDADDVR	63	//18	19//132	4.3995	1.09375	R.YVTTILDDAK[1354.71]IYSSHAK.K	Q16594:55	1	TAF9	YVTTILDDAKIYSSHAK	55
				-2	1.10089	JL120518_120518_rTFIID_50B.16709.16709.5	NP	7.42225	0.317394	0.00712	//18	15//132	3.35625	0.852941	R.YVTTILDDAK[1354.71]IYSSHAK.K	Q16594:55	1	TAF9	YVTTILDDAKIYSSHAK	55	//11	10//62	4.066	1.5	K.K[2190.16]ATVDADDVR.L	Q16594:63	1	TAF9	KATVDADDVR	63
				0	1.75772	JL120518_120518_rTFIID_85B.17911.17911.5	N	7.3195	0.333607		1//11	9//62	3.183	1.45	K.K[2190.16]ATVDADDVR.L	Q16594:63	1	TAF9	KATVDADDVR	63	//18	16//132	4.1365	1	R.YVTTILDDAK[1354.71]IYSSHAK.K	Q16594:55	1	TAF9	YVTTILDDAKIYSSHAK	55
				0	0.987034	JL120518_120518_rTFIID_85B.17914.17914.4	N	7.27725	0.366594		1//11	9//50	1.70375	0.9	K.K[2190.16]ATVDADDVR.L	Q16594:63	1	TAF9	KATVDADDVR	63	//18	17//100	5.5735	1.15625	R.YVTTILDDAK[1354.71]IYSSHAK.K	Q16594:55	1	TAF9	YVTTILDDAKIYSSHAK	55
				0	0.0826688	JL120518_120518_rTFIID_100B.18661.18661.5	N	7.14325	0.337615		//11	9//62	2.82825	1.45	K.K[2190.16]ATVDADDVR.L	Q16594:63	1	TAF9	KATVDADDVR	63	//18	14//132	4.315	0.9375	R.YVTTILDDAK[1354.71]IYSSHAK.K	Q16594:55	1	TAF9	YVTTILDDAKIYSSHAK	55
				-1	4.08425	JL120518_120518_rTFIID_70B.16363.16363.5	NP	6.6435	0.266614	9.72e-11	//18	17//132	3.26525	0.941176	R.YVTTILDDAK[1354.71]IYSSHAK.K	Q16594:55	1	TAF9	YVTTILDDAKIYSSHAK	55	1//11	9//62	3.37825	1.3	K.K[2190.16]ATVDADDVR.L	Q16594:63	1	TAF9	KATVDADDVR	63
				0	1.85458	JL120518_120518_rTFIID_D.18219.18219.5	N	4.88525	0.2263		//11	7//62	2.359	1	K.K[2190.16]ATVDADDVR.L	Q16594:63	1	TAF9	KATVDADDVR	63	//18	12//132	2.52625	0.59375	R.YVTTILDDAK[1354.72]IYSSHAK.K	Q16594:55	1	TAF9	YVTTILDDAKIYSSHAK	55
