# Supplementary material for: Isobaric crosslinking mass spectrometry technology for studying conformational and structural changes in proteins and complexes
Source: eLife journal article supplement (doi:10.7554/elife.99809), 2024-09-18
Supplement: fig1-figsupp2-data1 [file elife-99809-fig1-figsupp2-data1-v1.zip]

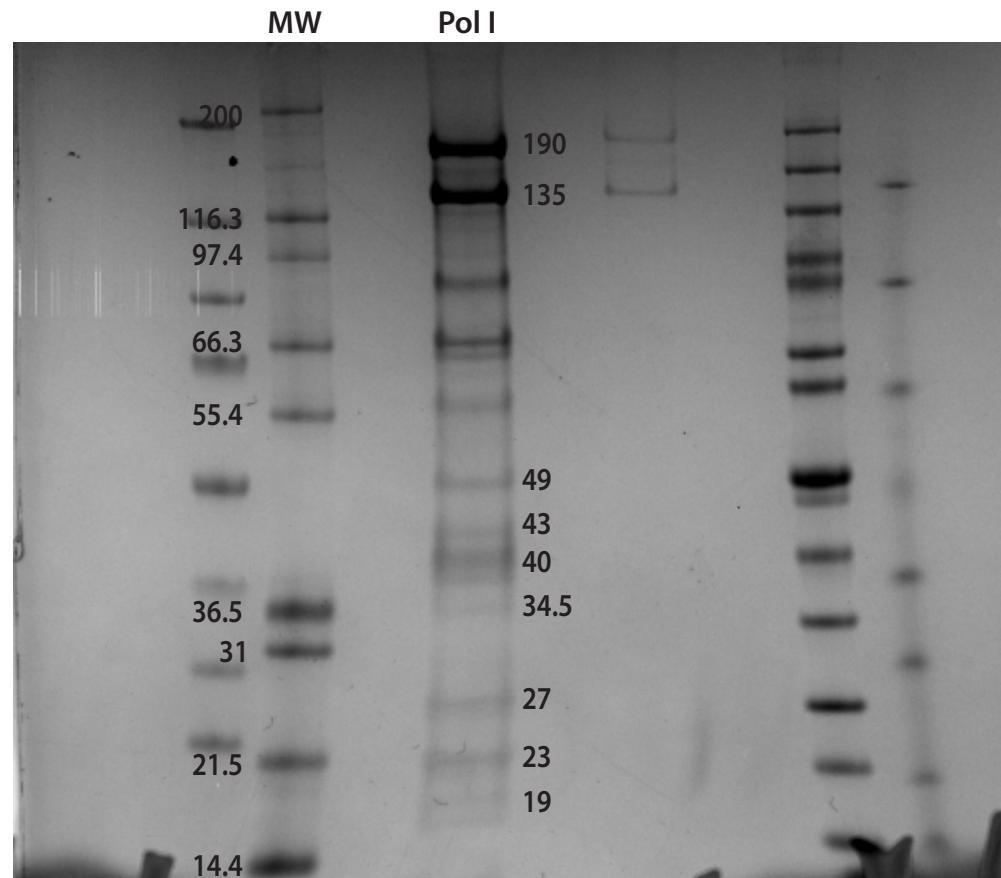

Figure1- Figure supplement 2- source data 1. The original gel for Figure 1-Figure supplement 2, indicating the relevant samples, bands and molecular weight marker sizes.
