# Supplementary material for: Isobaric crosslinking mass spectrometry technology for studying conformational and structural changes in proteins and complexes
Source: eLife journal article supplement (doi:10.7554/elife.99809), 2024-09-18
Supplement: fig4-data1 [file elife-99809-fig4-data1-v1.zip]

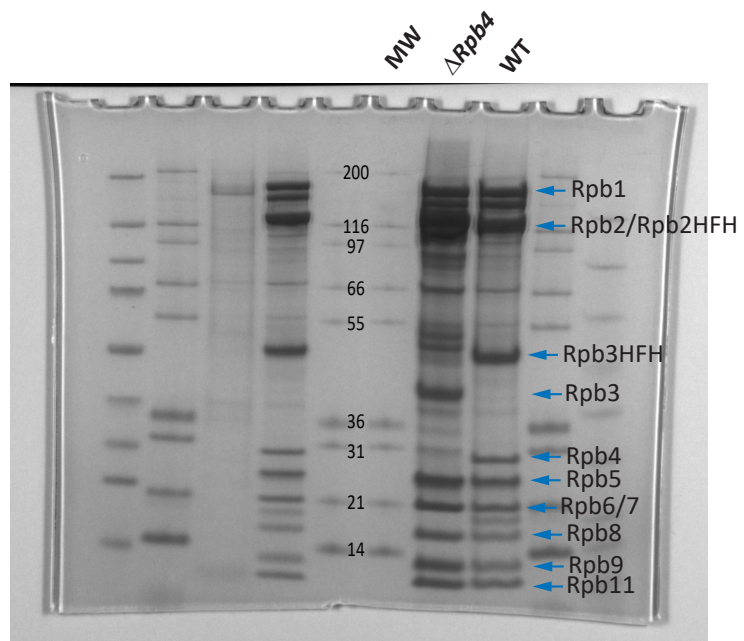

Figure 4- source data 1. The original gel for Figure 4a, indicating the relevant samples, bands, and molecular weight marker sizes.
