# Supplementary material for: Isobaric crosslinking mass spectrometry technology for studying conformational and structural changes in proteins and complexes
Source: eLife. 2024 Nov 14;13:RP99809. doi: 10.7554/eLife.99809 (PMC11563578; doi:10.7554/eLife.99809)
Supplement: Figure 1—source data 1. — The information includes the peptide sequence and protein name, site of Qlinker modification, score, reporter ion intensities, and reporter ion ratios. [file elife-99809-fig1-data1.xlsx]

## Sheet: RPA2HFH.mono.Q2
probability	spectrum	expect	peptide	protein	calc_neutral_pep_mass	Q2link0mz	Q2link0intensity	Q2link1mz	Q2link1intensity	corrected126	correct127	127/126ratio	126/127ratio
0.9525	JL033021_040221_RPA2HFH_Q2_10to1_100B.03360.03360.3	0.201	K.K[407.26]EYEPESTG.S	YCR088W	1317.62	126.127	31193.2	127.13	6734.23	33772.6	4415.97	0.130756	7.64783
0.9674	JL033021_040221_RPA2HFH_Q2_10to1_100B.03407.03407.3	0.562	K.ASM[147.04]M[147.04]GHK[425.27]VR.V	YOR341W	1344.67	126.127	42554.9	127.13	7479.4	46087.8	4194.52	0.0910114	10.9876
0.971	JL033021_040221_RPA2HFH_Q2_10to1_100B.04081.04081.4	8.79e-07	K.RLEEDNDEEQSHK[425.27]K.T	YOR341W	2052.98	126.127	37586.2	127.13	7344.4	40700.6	4495.9	0.110463	9.05282
0.9999	JL033021_040221_RPA2HFH_Q2_10to1_100B.04288.04288.4	0.0393	R.GSKLPPGHK[425.27]GAHGR.L	YLR418C	1694.94	126.127	143303	127.13	23989.7	155210	12842.3	0.0827413	12.0859
0.9942	JL033021_040221_RPA2HFH_Q2_10to1_100B.04465.04465.3	0.102	K.K[425.27]DEAASSTNK.K	DECOY_YDR515W_UNMAPPED	1346.68	126.127	85342.3	127.13	16023.1	92419	9508.65	0.102886	9.71947
1	JL033021_040221_RPA2HFH_Q2_10to1_100B.04622.04622.3	0.00251	R.VVTK[425.27]AM[147.04]SSR.-	YDL229W,YNL209W	1290.7	126.127	136593	127.13	23176.8	147940	12573.4	0.0849899	11.7661
1	JL033021_040221_RPA2HFH_Q2_10to1_100B.04651.04651.4	0.0034	K.AK[425.27]YC[160.03]DSM[147.04]GRPQR.K	YBR154C	1780.84	126.127	87510.4	127.13	14921.4	94779.4	8133.46	0.0858146	11.653
0.9976	JL033021_040221_RPA2HFH_Q2_10to1_100B.04659.04659.3	0.09	K.AK[425.27]YC[160.03]DSM[147.04]GRPQR.K	YBR154C	1780.84	126.126	26002.3	127.13	3867.58	28166.8	1810.13	0.0642647	15.5607
0.9798	JL033021_040221_RPA2HFH_Q2_10to1_100B.04916.04916.3	0.198	R.NPDAPK[425.27]GSTDPK.E	YPR110C	1522.77	126.127	125046	127.131	25913.7	135395	16542.9	0.122182	8.18448
0.9908	JL033021_040221_RPA2HFH_Q2_10to1_100B.05295.05295.4	0.051	K.HSKEPHYK[425.27]QSVK.Y	YOR341W	1763.94	126.127	171033	127.13	26503.8	185261	13046.9	0.0704241	14.1997
1	JL033021_040221_RPA2HFH_Q2_10to1_100B.05345.05345.3	3.73e-05	R.K[425.27]QNSPTTYGASR.R	YOR123C	1605.82	126.127	61735.9	127.131	11133	66858.9	6387.75	0.0955408	10.4667
0.9974	JL033021_040221_RPA2HFH_Q2_10to1_100B.05380.05380.4	0.0555	K.K[425.27]HSK[425.27]EPHYK.Q	YOR341W	1746.96	126.127	119593	127.13	20036.4	129529	10734.5	0.082873	12.0667
1	JL033021_040221_RPA2HFH_Q2_10to1_100B.05772.05772.3	0.000116	R.K[425.27]VYPSESR.Q	YPR010C	1261.67	126.127	230115	127.13	41142	249214	23429	0.0940115	10.637
0.9841	JL033021_040221_RPA2HFH_Q2_10to1_100B.05823.05823.3	0.000191	K.LVHEFHK[425.27]K.L	YOR341W	1333.76	126.127	600162	127.13	94637.7	650077	47533.8	0.0731202	13.6761
0.9851	JL033021_040221_RPA2HFH_Q2_10to1_100B.05993.05993.3	0.000792	K.LVHEFHK[425.27]K.L	YOR341W	1333.76	126.127	487860	127.13	77701.9	528429	39467.3	0.0746881	13.389
0.9926	JL033021_040221_RPA2HFH_Q2_10to1_100B.05995.05995.4	0.0194	R.EGAAM[147.04]YREEEEEEKDRSETK[425.27]R.R	YOR123C	2884.32	126.127	10271.1	127.13	1692.07	11124.8	891.122	0.0801024	12.484
1	JL033021_040221_RPA2HFH_Q2_10to1_100B.06098.06098.3	5.02e-06	R.LQTDVANSSSNSK[425.27]R.L	YOR341W	1802.92	126.127	89210.9	127.13	16714.8	96608.7	9902.55	0.102502	9.75594
0.9979	JL033021_040221_RPA2HFH_Q2_10to1_100B.06119.06119.3	0.0266	R.LQTDVM[147.04]LTEGK[425.27]PDSV.T	YPL181W	1944.98	126.126	37388.3	127.13	6868.72	40489.8	4003.94	0.0988876	10.1125
0.9998	JL033021_040221_RPA2HFH_Q2_10to1_100B.06153.06153.3	0.0114	R.LQTDVANSSSNSK[425.27]R.L	YOR341W	1802.92	126.127	100946	127.131	18546.7	109320	10812.1	0.098903	10.1109
1	JL033021_040221_RPA2HFH_Q2_10to1_100B.06281.06281.3	0.000803	K.K[425.27]RYPHLQNR.T	YPR010C	1507.85	126.127	270433	127.13	51052.4	292856	30429.3	0.103905	9.62414
0.9981	JL033021_040221_RPA2HFH_Q2_10to1_100B.06314.06314.3	0.0224	R.LQTDVANSSSNSK[425.27]R.L	YOR341W	1802.92	126.127	74986.1	127.13	12013.6	81221.2	6141.79	0.0756181	13.2244
0.9961	JL033021_040221_RPA2HFH_Q2_10to1_100B.06361.06361.4	0.068	K.SLYGKIQSGVVEGK[407.26]YR.D	YHR037W	2062.13	126.127	90747.1	127.13	14992.9	98288.9	7919.46	0.0805733	12.4111
0.991	JL033021_040221_RPA2HFH_Q2_10to1_100B.06488.06488.3	0.00577	K.KLVHEFHK[425.27]K.L	YOR341W	1461.85	126.127	154125	127.13	25519.7	166934	13510.2	0.0809315	12.3561
1	JL033021_040221_RPA2HFH_Q2_10to1_100B.06489.06489.4	0.00513	R.GVAM[147.04]NPVDHPHGGGNHQHIGK[425.27]ASTISR.G	YFR031C-A,YIL018W	3086.53	126.127	13590.5	127.131	2020.98	14721.9	945.581	0.0642297	15.5691
1	JL033021_040221_RPA2HFH_Q2_10to1_100B.06497.06497.6	0.00553	R.GVAM[147.04]NPVDHPHGGGNHQHIGK[425.27]ASTISR.G	YFR031C-A,YIL018W	3086.53	126.127	98834.2	127.13	15339.2	107056	7564.54	0.0706595	14.1524
1	JL033021_040221_RPA2HFH_Q2_10to1_100B.06498.06498.5	7.2e-08	R.GVAM[147.04]NPVDHPHGGGNHQHIGK[425.27]ASTISR.G	YFR031C-A,YIL018W	3086.53	126.127	55238.1	127.13	10534.8	59817.2	6329.99	0.105822	9.44981
1	JL033021_040221_RPA2HFH_Q2_10to1_100B.06511.06511.3	0.000806	R.LK[425.27]SVEVHR.Y	YOR341W	1263.74	126.127	131009	127.13	21947.4	141894	11757.4	0.0828603	12.0685
1	JL033021_040221_RPA2HFH_Q2_10to1_100B.06587.06587.4	0.00592	R.HIK[425.27]NRDVVLM[147.04]NR.Q	YOR341W	1807	126.127	113865	127.13	21233.7	123308	12531.7	0.101629	9.83968
0.9999	JL033021_040221_RPA2HFH_Q2_10to1_100B.06629.06629.3	0.0111	R.LK[425.27]SVEVHR.Y	YOR341W	1263.74	126.127	170993	127.13	31122.2	185181	17999.5	0.0971994	10.2881
0.9999	JL033021_040221_RPA2HFH_Q2_10to1_100B.06632.06632.3	0.04	R.LK[425.27]SVEVHR.Y	YOR341W	1263.74	126.127	169679	127.13	26636.1	183792	13310.3	0.0724203	13.8083
1	JL033021_040221_RPA2HFH_Q2_10to1_100B.06653.06653.4	2.01e-07	R.GVAM[147.04]NPVDHPHGGGNHQHIGK[425.27]ASTISR.G	YFR031C-A,YIL018W	3086.53	126.127	43336.8	127.13	7259.54	46937.6	3888.72	0.0828487	12.0702
1	JL033021_040221_RPA2HFH_Q2_10to1_100B.06661.06661.6	1.36e-08	R.GVAM[147.04]NPVDHPHGGGNHQHIGK[425.27]ASTISR.G	YFR031C-A,YIL018W	3086.53	126.127	186602	127.13	33405.4	202089	19044.8	0.0942397	10.6112
1	JL033021_040221_RPA2HFH_Q2_10to1_100B.06662.06662.5	3.33e-08	R.GVAM[147.04]NPVDHPHGGGNHQHIGK[425.27]ASTISR.G	YFR031C-A,YIL018W	3086.53	126.127	129689	127.13	25398.8	140435	15574.3	0.110901	9.01707
1	JL033021_040221_RPA2HFH_Q2_10to1_100B.06663.06663.3	0.00491	K.VIK[425.27]PPGQAR.T	YPR010C	1261.76	126.127	115417	127.13	18612.5	125012	9583.58	0.0766611	13.0444
0.9985	JL033021_040221_RPA2HFH_Q2_10to1_100B.06732.06732.5	0.000613	R.GVAM[147.04]NPVDHPHGGGNHQHIGK[425.27]ASTISR.G	YFR031C-A,YIL018W	3086.53	126.127	52414.4	127.13	10302.4	56756.9	6334.47	0.111607	8.96001
0.9699	JL033021_040221_RPA2HFH_Q2_10to1_100B.06757.06757.4	0.281	R.GVAM[147.04]NPVDHPHGGGNHQHIGK[425.27]ASTISR.G	YFR031C-A,YIL018W	3086.53	126.127	12454.4	127.13	1968.19	13490.1	991.009	0.0734617	13.6125
0.9758	JL033021_040221_RPA2HFH_Q2_10to1_100B.06807.06807.3	1.24	R.HIK[407.26]NRDVVLM[147.04]NR.Q	YOR341W	1788.99	126.127	68037	127.13	12367.3	73682.1	7144.73	0.096967	10.3128
1	JL033021_040221_RPA2HFH_Q2_10to1_100B.06956.06956.3	0.0709	R.TASK[425.27]DLPTR.A	YNL248C	1284.71	126.127	131645	127.13	22930.2	142576	12753.4	0.0894495	11.1795
0.9721	JL033021_040221_RPA2HFH_Q2_10to1_100B.06959.06959.3	0.104	K.SIVEANNNM[147.04]NK[425.27]VQR.D	YOR341W	1928.98	126.127	67295.8	127.131	11550.7	72885.1	6336.21	0.0869342	11.503
1	JL033021_040221_RPA2HFH_Q2_10to1_100B.07062.07062.4	2.37e-11	R.SHFYPQGEK[425.27]ASPYGHHGAR.K	YDR481C	2422.16	126.127	53000.1	127.13	9504.41	57398.7	5426.78	0.0945455	10.5769
1	JL033021_040221_RPA2HFH_Q2_10to1_100B.07078.07078.5	1.57e-11	R.SHFYPQGEK[425.27]ASPYGHHGAR.K	YDR481C	2422.16	126.127	117953	127.13	21398.1	127740	12340.8	0.0966089	10.351
1	JL033021_040221_RPA2HFH_Q2_10to1_100B.07127.07127.5	1.04e-06	R.SHFYPQGEK[425.27]ASPYGHHGAR.K	YDR481C	2422.16	126.126	87953	127.13	14175.9	95265.5	7294.81	0.0765735	13.0593
0.9983	JL033021_040221_RPA2HFH_Q2_10to1_100B.07158.07158.4	0.102	R.SHFYPQGEK[425.27]ASPYGHHGAR.K	YDR481C	2422.16	126.126	28354.3	127.13	4367.87	30713.4	2135.08	0.0695164	14.3851
1	JL033021_040221_RPA2HFH_Q2_10to1_100B.07217.07217.5	4.17e-05	R.QPTLHK[407.26]ASM[147.04]M[147.04]GHK[425.27]VR.V	YOR341W	2328.24	126.127	249983	127.13	46809.2	270713	27718.2	0.102389	9.76663
0.9596	JL033021_040221_RPA2HFH_Q2_10to1_100B.07274.07274.5	0.0338	K.RGEVVK[425.27]IIRKSETSGR.Y	YBR154C	2111.23	126.127	235243	127.13	40528.3	254780	22310.9	0.0875694	11.4195
1	JL033021_040221_RPA2HFH_Q2_10to1_100B.07514.07514.3	0.0148	R.LK[425.27]ESQLPR.L	YBR154C	1266.74	126.127	241084	127.13	45592.2	261073	27213	0.104235	9.59367
1	JL033021_040221_RPA2HFH_Q2_10to1_100B.07525.07525.3	0.0193	R.LK[425.27]ESQLPR.L	YBR154C	1266.74	126.127	300501	127.13	52574.6	325451	29361.1	0.0902169	11.0844
1	JL033021_040221_RPA2HFH_Q2_10to1_100B.08189.08189.5	5.2e-09	R.SAHHIHSASSNPDINVVDAQK[425.27]R.N	YBL005W-B,YBR012W-B,YDR210C-D,YDR261C-D,YDR316W-B,YDR365W-B,YER138C,YER160C,YGR027W-B,YGR161C-D,YHR214C-B,YJR027W,YJR029W,YLR157C-B,YLR227W-B,YML039W,YML045W,YMR045C,YMR050C,YNL054W-B,YOL103W-B,YOR142W-B,YPL257W-B,YPR137C-B,YPR158C-D,YPR158W-B	2679.36	126.127	129806	127.131	24043.5	140572	14111.5	0.100386	9.96153
1	JL033021_040221_RPA2HFH_Q2_10to1_100B.08199.08199.4	5.21e-12	R.SAHHIHSASSNPDINVVDAQK[425.27]R.N	YBL005W-B,YBR012W-B,YDR210C-D,YDR261C-D,YDR316W-B,YDR365W-B,YER138C,YER160C,YGR027W-B,YGR161C-D,YHR214C-B,YJR027W,YJR029W,YLR157C-B,YLR227W-B,YML039W,YML045W,YMR045C,YMR050C,YNL054W-B,YOL103W-B,YOR142W-B,YPL257W-B,YPR137C-B,YPR158C-D,YPR158W-B	2679.36	126.127	73670.5	127.13	13986.8	79778.2	8374.37	0.104971	9.52646
1	JL033021_040221_RPA2HFH_Q2_10to1_100B.08201.08201.4	5.1e-10	R.SAHHIHSASSNPDINVVDAQK[425.27]R.N	YBL005W-B,YBR012W-B,YDR210C-D,YDR261C-D,YDR316W-B,YDR365W-B,YER138C,YER160C,YGR027W-B,YGR161C-D,YHR214C-B,YJR027W,YJR029W,YLR157C-B,YLR227W-B,YML039W,YML045W,YMR045C,YMR050C,YNL054W-B,YOL103W-B,YOR142W-B,YPL257W-B,YPR137C-B,YPR158C-D,YPR158W-B	2679.36	126.127	71512.9	127.13	14720.6	77432.2	9354.38	0.120807	8.27765
1	JL033021_040221_RPA2HFH_Q2_10to1_100B.08206.08206.5	3.42e-08	R.SAHHIHSASSNPDINVVDAQK[425.27]R.N	YBL005W-B,YBR012W-B,YDR210C-D,YDR261C-D,YDR316W-B,YDR365W-B,YER138C,YER160C,YGR027W-B,YGR161C-D,YHR214C-B,YJR027W,YJR029W,YLR157C-B,YLR227W-B,YML039W,YML045W,YMR045C,YMR050C,YNL054W-B,YOL103W-B,YOR142W-B,YPL257W-B,YPR137C-B,YPR158C-D,YPR158W-B	2679.36	126.127	148515	127.13	27765.5	160831	16420.4	0.102097	9.7946
0.9999	JL033021_040221_RPA2HFH_Q2_10to1_100B.08211.08211.4	0.033	R.LRHM[147.04]VNDK[425.27]FQVR.S	YPR010C	1855	126.127	109853	127.13	22717.6	118945	14481.9	0.121753	8.21337
0.9971	JL033021_040221_RPA2HFH_Q2_10to1_100B.08258.08258.3	0.0207	R.SAHHIHSASSNPDINVVDAQK[425.27]R.N	YBL005W-B,YBR012W-B,YDR210C-D,YDR261C-D,YDR316W-B,YDR365W-B,YER138C,YER160C,YGR027W-B,YGR161C-D,YHR214C-B,YJR027W,YJR029W,YLR157C-B,YLR227W-B,YML039W,YML045W,YMR045C,YMR050C,YNL054W-B,YOL103W-B,YOR142W-B,YPL257W-B,YPR137C-B,YPR158C-D,YPR158W-B	2679.36	126.127	19480.8	127.13	3138.99	21100.4	1614.84	0.076531	13.0666
1	JL033021_040221_RPA2HFH_Q2_10to1_100B.08267.08267.3	9.85e-05	R.SAHHIHSASSNPDINVVDAQK[425.27]R.N	YBL005W-B,YBR012W-B,YDR210C-D,YDR261C-D,YDR316W-B,YDR365W-B,YER138C,YER160C,YGR027W-B,YGR161C-D,YHR214C-B,YJR027W,YJR029W,YLR157C-B,YLR227W-B,YML039W,YML045W,YMR045C,YMR050C,YNL054W-B,YOL103W-B,YOR142W-B,YPL257W-B,YPR137C-B,YPR158C-D,YPR158W-B	2679.36	126.127	20946	127.13	2904.44	22691.3	1231.96	0.0542922	18.4189
1	JL033021_040221_RPA2HFH_Q2_10to1_100B.08362.08362.5	8.62e-08	R.SAHHIHSASSNPDINVVDAQK[425.27]R.N	YBL005W-B,YBR012W-B,YDR210C-D,YDR261C-D,YDR316W-B,YDR365W-B,YER138C,YER160C,YGR027W-B,YGR161C-D,YHR214C-B,YJR027W,YJR029W,YLR157C-B,YLR227W-B,YML039W,YML045W,YMR045C,YMR050C,YNL054W-B,YOL103W-B,YOR142W-B,YPL257W-B,YPR137C-B,YPR158C-D,YPR158W-B	2679.36	126.127	104952	127.13	17703.2	113671	9548.64	0.0840025	11.9044
1	JL033021_040221_RPA2HFH_Q2_10to1_100B.08371.08371.4	5.74e-08	R.SAHHIHSASSNPDINVVDAQK[425.27]R.N	YBL005W-B,YBR012W-B,YDR210C-D,YDR261C-D,YDR316W-B,YDR365W-B,YER138C,YER160C,YGR027W-B,YGR161C-D,YHR214C-B,YJR027W,YJR029W,YLR157C-B,YLR227W-B,YML039W,YML045W,YMR045C,YMR050C,YNL054W-B,YOL103W-B,YOR142W-B,YPL257W-B,YPR137C-B,YPR158C-D,YPR158W-B	2679.36	126.127	62075.5	127.13	10332.6	67233.8	5499.53	0.081797	12.2254
1	JL033021_040221_RPA2HFH_Q2_10to1_100B.08378.08378.4	3.71e-05	R.LRHM[147.04]VNDK[425.27]FQVR.S	YPR010C	1855	126.127	158149	127.13	36934.6	171203	25381	0.148251	6.74533
0.9977	JL033021_040221_RPA2HFH_Q2_10to1_100B.08455.08455.3	0.111	R.HM[147.04]VNDK[425.27]FQVR.S	YPR010C	1585.81	126.127	124754	127.13	21911.7	135111	12280.6	0.090893	11.0019
0.9846	JL033021_040221_RPA2HFH_Q2_10to1_100B.08618.08618.3	0.0535	R.HM[147.04]VNDK[425.27]FQVR.S	YPR010C	1585.81	126.127	162671	127.13	28848.7	176174	16310.2	0.09258	10.8015
1	JL033021_040221_RPA2HFH_Q2_10to1_100B.08720.08720.4	0.149	K.YK[425.27]DESDREHLESLPEM[147.04]ER.E	YGL244W	2575.19	126.127	53397.3	127.13	9868.5	57826.4	5781.29	0.0999766	10.0023
1	JL033021_040221_RPA2HFH_Q2_10to1_100B.08886.08886.4	3.29e-06	R.RTEYVSNTIAAHDNTSLK[425.27]R.K	YBR279W	2472.28	126.127	65341	127.131	12195.6	70759.8	7202.72	0.101791	9.82404
1	JL033021_040221_RPA2HFH_Q2_10to1_100B.08974.08974.3	7.77e-06	R.NK[425.27]NNDIESSSPSQLQHEA.-	YML123C	2294.09	126.127	53376	127.13	9413.58	57807.1	5295.7	0.0916098	10.9159
1	JL033021_040221_RPA2HFH_Q2_10to1_100B.08978.08978.3	0.000381	R.NK[425.27]NNDIESSSPSQLQHEA.-	YML123C	2294.09	126.127	52534.8	127.13	8569.59	56901.7	4466.82	0.0785006	12.7388
1	JL033021_040221_RPA2HFH_Q2_10to1_100B.08985.08985.3	2.02e-06	R.NK[425.27]NNDIESSSPSQLQHEA.-	YML123C	2294.09	126.127	46532.8	127.13	7429.75	50402.2	3784.2	0.0750801	13.3191
1	JL033021_040221_RPA2HFH_Q2_10to1_100B.09035.09035.3	2.62e-06	R.K[425.27]M[147.04]M[147.04]SFQANPTEESISK.F	YBR154C	2156.02	126.126	69638.3	127.13	11887.9	75422.7	6487.22	0.0860116	11.6263
1	JL033021_040221_RPA2HFH_Q2_10to1_100B.09044.09044.3	9.1e-08	R.K[425.27]M[147.04]M[147.04]SFQANPTEESISK.F	YBR154C	2156.02	126.126	61045.4	127.13	10590.3	66114.6	5868.17	0.0887576	11.2666
0.9985	JL033021_040221_RPA2HFH_Q2_10to1_100B.09155.09155.3	0.234	R.VLPNEK[425.27]TLR.L	YOR341W	1365.81	126.127	289121	127.13	53782	313100	31676.6	0.101171	9.88426
0.9965	JL033021_040221_RPA2HFH_Q2_10to1_100B.09194.09194.3	0.0527	R.RKPDQKLLDK[407.26].L	DECOY_YHR152W_UNMAPPED	1518.9	126.126	82823	127.13	15659.8	89690	9345.54	0.104198	9.59708
1	JL033021_040221_RPA2HFH_Q2_10to1_100B.09522.09522.4	7e-11	R.HK[425.27]NVPVHVSPAFR.V	YBR048W,YDR025W	1783.99	126.127	89218.3	127.13	16689	96617	9874.28	0.1022	9.78471
0.9985	JL033021_040221_RPA2HFH_Q2_10to1_100B.09911.09911.3	0.0561	K.FTEK[425.27]IK[425.27]SM[147.04].-	YNL113W	1592.86	126.127	82876.4	127.13	14626	89756.4	8232.87	0.0917246	10.9022
1	JL033021_040221_RPA2HFH_Q2_10to1_100B.10078.10078.3	0.00108	R.STGPVNSLTM[147.04]QPVK[425.27]GR.K	YPR010C	1984.05	126.128	84899.2	127.131	15314.4	91944.3	8788.95	0.0955899	10.4614
1	JL033021_040221_RPA2HFH_Q2_10to1_100B.10287.10287.5	3.54e-07	E.QRK[425.27]ALANQLLTPSSNVSTHTLNK.K	YOR341W	2817.55	126.127	57142.5	127.13	9231.68	61893.2	4762.65	0.0769494	12.9955
0.9541	JL033021_040221_RPA2HFH_Q2_10to1_100B.10300.10300.5	4.84e-05	E.QRK[425.27]ALANQLLTPSSNVSTHTLNK.K	YOR341W	2817.55	126.127	51620.8	127.13	8147.54	55914.1	4096.61	0.0732662	13.6489
1	JL033021_040221_RPA2HFH_Q2_10to1_100B.10369.10369.3	2.18e-09	K.TK[425.27]QAVSYDEPDEDEIETM[147.04]R.E	YOR341W	2568.16	126.127	48582	127.13	9280.73	52609.2	5583.72	0.106136	9.42189
1	JL033021_040221_RPA2HFH_Q2_10to1_100B.10373.10373.3	2.33e-05	K.TK[425.27]QAVSYDEPDEDEIETM[147.04]R.E	YOR341W	2568.16	126.127	54171.1	127.13	9183.49	58671.2	4977.77	0.0848417	11.7867
0.9529	JL033021_040221_RPA2HFH_Q2_10to1_100B.10393.10393.5	3.12	R.FIKK[425.27]HK[425.27]K[407.26]QVTNPIDEK.N	YOR340C	2825.64	126.127	78947.8	127.13	13484.2	85505.3	7362.08	0.0861008	11.6143
0.9987	JL033021_040221_RPA2HFH_Q2_10to1_100B.10406.10406.5	0.0297	K.TATEVTPQEPK[425.27]HIQEEEEQDVDM[147.04]TGDEEQEEEPDREK.L	YNL113W	4667.05	126.127	26874.4	127.13	3948.8	29111.9	1818.87	0.0624784	16.0055
1	JL033021_040221_RPA2HFH_Q2_10to1_100B.10420.10420.4	0.000422	R.RAYLHYIPK[425.27]YNR.Y	YBR048W,YDR025W	1890.03	126.126	86506.2	127.13	13586.9	93701.3	6793.56	0.0725022	13.7927
1	JL033021_040221_RPA2HFH_Q2_10to1_100B.10456.10456.3	5.52e-07	R.LIGDAAK[425.27]NQAALNPR.N	YDL229W,YNL209W	1848.03	126.127	88130.5	127.131	16279.3	95440.7	9532.82	0.0998822	10.0118
0.9999	JL033021_040221_RPA2HFH_Q2_10to1_100B.10562.10562.3	0.0356	R.LIGDAAK[425.27]NQAALNPR.N	YDL229W,YNL209W	1848.03	126.127	80515.9	127.13	14440.2	87198.1	8245.69	0.0945628	10.575
1	JL033021_040221_RPA2HFH_Q2_10to1_100B.10806.10806.3	0.000734	R.DLK[425.27]FEPQGR.Q	YPR110C	1385.74	126.127	62325.9	127.13	12070.2	67491.1	7339.08	0.108741	9.19612
1	JL033021_040221_RPA2HFH_Q2_10to1_100B.10919.10919.4	0.0342	K.LVHEFHK[425.27]K[425.27]LLSR.G	YOR341W	2100.24	126.127	217360	127.13	43770.8	235360	27390.9	0.116379	8.59262
1	JL033021_040221_RPA2HFH_Q2_10to1_100B.10921.10921.5	2.04e-05	R.TAAHTHIK[425.27]GLGLDESGVAK[425.27]R.V	YDR190C	2654.47	126.127	67317.7	127.13	12362.9	72902.1	7204.61	0.0988258	10.1188
0.9907	JL033021_040221_RPA2HFH_Q2_10to1_100B.10954.10954.6	0.136	R.K[425.27]NSHETPAK[425.27]SAATLIHSTELHNR.V	YPL260W	3135.66	126.126	48462.8	127.129	9113.71	52481.3	5415.44	0.103188	9.69104
1	JL033021_040221_RPA2HFH_Q2_10to1_100B.10977.10977.5	3.81e-07	R.TAAHTHIK[425.27]GLGLDESGVAK[425.27]R.V	YDR190C	2654.47	126.127	61265	127.13	10973.9	66349.5	6259.53	0.0943417	10.5998
1	JL033021_040221_RPA2HFH_Q2_10to1_100B.10997.10997.3	0.00137	R.TPQIGDK[425.27]FSSR.H	YPR010C	1531.81	126.127	57916.2	127.13	10914.5	62718.3	6496.5	0.103582	9.65417
1	JL033021_040221_RPA2HFH_Q2_10to1_100B.11020.11020.3	1.04e-05	R.TDILK[425.27]TSVDTGR.E	YOR341W	1601.87	126.127	64192.6	127.13	10085.9	69531.8	5045.07	0.0725577	13.7821
1	JL033021_040221_RPA2HFH_Q2_10to1_100B.11057.11057.3	0.000901	R.TPQIGDK[425.27]FSSR.H	YPR010C	1531.81	126.127	107200	127.13	17455.6	116111	9081.42	0.0782133	12.7856
0.9539	JL033021_040221_RPA2HFH_Q2_10to1_100B.11059.11059.3	0.0752	F.PLFK[407.26]IM[147.04]PSVESSLSVHSR.A	DECOY_YKL215C_UNMAPPED	2308.23	126.127	55692	127.13	9871.7	60314.9	5578.7	0.0924929	10.8116
0.9999	JL033021_040221_RPA2HFH_Q2_10to1_100B.11093.11093.4	0.000104	R.NPTTRPK[425.27]TGSTYILSTEVK.N	YOR341W	2389.29	126.127	56389.2	127.13	10866.5	61062.8	6582.08	0.107792	9.27713
0.9979	JL033021_040221_RPA2HFH_Q2_10to1_100B.11148.11148.3	0.373	R.TPQIGDK[425.27]FSSR.H	YPR010C	1531.81	126.127	68275.2	127.13	13074.3	73934.6	7880.88	0.106593	9.38152
0.9999	JL033021_040221_RPA2HFH_Q2_10to1_100B.11335.11335.5	4.72e-05	R.K[425.27]ALANQLLTPSSNVSTHTLNKK.V	YOR341W	2661.49	126.127	64818.1	127.13	12560.1	70189.7	7640.27	0.108852	9.18681
0.9997	JL033021_040221_RPA2HFH_Q2_10to1_100B.11341.11341.4	0.0957	R.K[425.27]ALANQLLTPSSNVSTHTLNKK.V	YOR341W	2661.49	126.127	42647.5	127.131	7649.44	46186.8	4368.42	0.0945814	10.5729
1	JL033021_040221_RPA2HFH_Q2_10to1_100B.11345.11345.5	1.82e-08	R.K[425.27]ALANQLLTPSSNVSTHTLNKK.V	YOR341W	2661.49	126.127	60412.9	127.13	11565.8	65420.7	6970.21	0.106545	9.38575
0.9999	JL033021_040221_RPA2HFH_Q2_10to1_100B.11348.11348.5	1.11e-05	R.K[425.27]ALANQLLTPSSNVSTHTLNKK.V	YOR341W	2661.49	126.127	55674.7	127.13	10319.5	60292.5	6060.1	0.100512	9.94909
1	JL033021_040221_RPA2HFH_Q2_10to1_100B.11450.11450.3	4.24e-06	K.TEK[425.27]VDLALNR.N	YPR010C	1454.82	126.127	57516.8	127.13	9173.2	62299.6	4666.39	0.0749025	13.3507
0.9998	JL033021_040221_RPA2HFH_Q2_10to1_100B.11792.11792.4	5.81e-05	K.GSTDPK[425.27]ELYNNAHVYAR.D	YPR110C	2231.11	126.127	35762.7	127.13	6813.85	38727.4	4091.08	0.105638	9.46628
0.9997	JL033021_040221_RPA2HFH_Q2_10to1_100B.11815.11815.3	0.0412	K.K[425.27]EFEHIGGVIGAR.V	YGR159C	1708.93	126.127	71146.5	127.13	12908.8	77049.9	7445.84	0.0966366	10.348
0.9999	JL033021_040221_RPA2HFH_Q2_10to1_100B.11879.11879.3	0.0613	K.K[425.27]EFEHIGGVIGAR.V	YGR159C	1708.93	126.127	73613.2	127.13	13099.5	79723.3	7428.72	0.0931813	10.7318
1	JL033021_040221_RPA2HFH_Q2_10to1_100B.12266.12266.3	0.00731	R.K[425.27]YPYPFIHR.M	YBL005W-B,YBR012W-B,YDR098C-B,YDR210C-D,YDR261C-D,YDR316W-B,YDR365W-B,YER138C,YER160C,YGR027W-B,YGR038C-B,YGR161C-D,YHR214C-B,YJR027W,YJR029W,YLR157C-B,YLR227W-B,YML039W,YML045W,YMR045C,YMR050C,YNL054W-B,YNL284C-B,YOL103W-B,YOR142W-B,YPL257W-B,YPR137C-B,YPR158C-D,YPR158W-B	1516.83	126.127	82571.2	127.13	14792.9	89424.1	8439.16	0.0943723	10.5963
1	JL033021_040221_RPA2HFH_Q2_10to1_100B.12280.12280.3	0.00153	R.K[425.27]YPYPFIHR.M	YBL005W-B,YBR012W-B,YDR098C-B,YDR210C-D,YDR261C-D,YDR316W-B,YDR365W-B,YER138C,YER160C,YGR027W-B,YGR038C-B,YGR161C-D,YHR214C-B,YJR027W,YJR029W,YLR157C-B,YLR227W-B,YML039W,YML045W,YMR045C,YMR050C,YNL054W-B,YNL284C-B,YOL103W-B,YOR142W-B,YPL257W-B,YPR137C-B,YPR158C-D,YPR158W-B	1516.83	126.127	83016.2	127.13	13607.7	89916.3	7129.14	0.0792864	12.6125
1	JL033021_040221_RPA2HFH_Q2_10to1_100B.12308.12308.3	0.000534	R.K[425.27]YPYPFIHR.M	YBL005W-B,YBR012W-B,YDR098C-B,YDR210C-D,YDR261C-D,YDR316W-B,YDR365W-B,YER138C,YER160C,YGR027W-B,YGR038C-B,YGR161C-D,YHR214C-B,YJR027W,YJR029W,YLR157C-B,YLR227W-B,YML039W,YML045W,YMR045C,YMR050C,YNL054W-B,YNL284C-B,YOL103W-B,YOR142W-B,YPL257W-B,YPR137C-B,YPR158C-D,YPR158W-B	1516.83	126.127	68803.9	127.13	12277.3	74514.6	6979.38	0.0936646	10.6764
0.9826	JL033021_040221_RPA2HFH_Q2_10to1_100B.12581.12581.3	0.347	R.IVLVHLGK[425.27]DGSQDKFR.M	YPR010C	2108.18	126.127	85174.2	127.131	16467.3	92233.1	9999.74	0.108418	9.22355
0.9848	JL033021_040221_RPA2HFH_Q2_10to1_100B.12589.12589.5	0.238	R.IVLVHLGK[425.27]DGSQDKFR.M	YPR010C	2108.18	126.127	74475.2	127.131	14712.5	80644.8	9079.79	0.11259	8.88179
1	JL033021_040221_RPA2HFH_Q2_10to1_100B.12592.12592.3	0.00314	R.K[425.27]ALANQLLTPSSNVSTHTLNK.K	YOR341W	2533.39	126.126	55067.7	127.13	8163.45	59652	3804.22	0.0637735	15.6805
1	JL033021_040221_RPA2HFH_Q2_10to1_100B.12614.12614.4	1.26e-05	R.K[425.27]ALANQLLTPSSNVSTHTLNK.K	YOR341W	2533.39	126.127	61078.7	127.13	11637.6	66142.1	6987.45	0.105643	9.46585
1	JL033021_040221_RPA2HFH_Q2_10to1_100B.12686.12686.3	1.74e-05	R.K[425.27]ALANQLLTPSSNVSTHTLNK.K	YOR341W	2533.39	126.127	47988.7	127.13	9045.64	51967.7	5385.06	0.103623	9.65035
0.9992	JL033021_040221_RPA2HFH_Q2_10to1_100B.13577.13577.3	0.042	R.EAAAEVTNLDK[425.27]DTPADDPELLKR.L	YOR341W	2807.43	126.127	35068.4	127.13	5521	37985.1	2768.02	0.0728713	13.7228
1	JL033021_040221_RPA2HFH_Q2_10to1_100B.13589.13589.3	0.00275	R.EAAAEVTNLDK[425.27]DTPADDPELLKR.L	YOR341W	2807.43	126.127	37832.3	127.13	6947.65	40970.7	4048.66	0.0988184	10.1196
0.9977	JL033021_040221_RPA2HFH_Q2_10to1_100B.13855.13855.5	1.12e-05	F.RK[425.27]EQC[160.03]VLQYVFHSRPNLSR.K	YOR341W	2713.43	126.127	33049	127.131	5516.7	35795.2	2944.7	0.0822652	12.1558
0.9998	JL033021_040221_RPA2HFH_Q2_10to1_100B.13857.13857.5	1.67e-05	F.RK[425.27]EQC[160.03]VLQYVFHSRPNLSR.K	YOR341W	2713.43	126.127	39361.4	127.13	5906.98	42637.5	2796.22	0.0655813	15.2483
0.9999	JL033021_040221_RPA2HFH_Q2_10to1_100B.13954.13954.4	7.85e-05	R.EAAAEVTNLDKDTPADDPELLK[425.27]R.L	YOR341W	2807.43	126.127	33689.7	127.13	7209.59	36476	4701.24	0.128886	7.7588
0.9939	JL033021_040221_RPA2HFH_Q2_10to1_100B.13959.13959.3	0.0513	R.EAAAEVTNLDKDTPADDPELLK[425.27]R.L	YOR341W	2807.43	126.127	27770.1	127.13	5393.52	30071.3	3286.6	0.109293	9.14968
0.9992	JL033021_040221_RPA2HFH_Q2_10to1_100B.13998.13998.3	0.0147	R.EAAAEVTNLDKDTPADDPELLK[425.27]R.L	YOR341W	2807.43	126.127	29783.4	127.13	6800.92	32243.1	4614	0.1431	6.9881
1	JL033021_040221_RPA2HFH_Q2_10to1_100B.14010.14010.3	0.00221	R.EAAAEVTNLDKDTPADDPELLK[425.27]R.L	YOR341W	2807.43	126.127	35342	127.13	5914.33	38278.6	3164.93	0.0826815	12.0946
1	JL033021_040221_RPA2HFH_Q2_10to1_100B.14083.14083.3	0.000671	R.DNNK[425.27]SGILDAVTSSK.V	YOR341W	1844.96	126.127	51765.7	127.13	8708.96	56066.5	4685.21	0.0835653	11.9667
1	JL033021_040221_RPA2HFH_Q2_10to1_100B.14106.14106.3	1.5e-06	R.DNNK[425.27]SGILDAVTSSK.V	YOR341W	1844.96	126.127	59317.8	127.13	10868.4	64238.8	6321.22	0.0984019	10.1624
1	JL033021_040221_RPA2HFH_Q2_10to1_100B.14159.14159.4	0.000832	R.SLGHWVDSNGEPIDGK[425.27]LR.F	YOR340C	2276.16	126.127	46466.6	127.13	7249.98	50331.9	3597.51	0.0714757	13.9908
1	JL033021_040221_RPA2HFH_Q2_10to1_100B.14162.14162.4	2.54e-06	R.SLGHWVDSNGEPIDGK[425.27]LR.F	YOR340C	2276.16	126.127	44035.5	127.13	7998.11	47689.2	4617.44	0.0968237	10.3281
1	JL033021_040221_RPA2HFH_Q2_10to1_100B.14225.14225.3	0.00172	R.ITM[147.04]AALNPEAIDEENK[425.27]PSTLR.L	YML074C	2625.34	126.127	49936.2	127.13	8360.06	54085.4	4475.57	0.0827501	12.0846
0.9996	JL033021_040221_RPA2HFH_Q2_10to1_100B.14274.14274.3	0.0434	R.ITM[147.04]AALNPEAIDEENK[425.27]PSTLR.L	YML074C	2625.34	126.127	53125.4	127.13	9191.27	57537.2	5079.97	0.0882903	11.3263
1	JL033021_040221_RPA2HFH_Q2_10to1_100B.14604.14604.5	6.94e-05	R.FRLPSK[425.27]LGEEVHENSQNQLLSK.V	YOR341W	2849.51	126.127	43221.2	127.13	7784.2	46807.9	4461.32	0.0953111	10.492
1	JL033021_040221_RPA2HFH_Q2_10to1_100B.14646.14646.6	4.44e-08	R.SLHK[425.27]EHLTEGGNM[147.04]AFHNHLNDFAHIEDPLER.R	YML123C	3920.87	126.127	63641.5	127.131	12851.1	68911.4	8057.69	0.116928	8.55225
0.9979	JL033021_040221_RPA2HFH_Q2_10to1_100B.14654.14654.5	0.145	R.SLHK[425.27]EHLTEGGNM[147.04]AFHNHLNDFAHIEDPLER.R	YML123C	3920.87	126.127	48867.1	127.13	7667.46	52931.7	3829.37	0.0723455	13.8226
0.9993	JL033021_040221_RPA2HFH_Q2_10to1_100B.14659.14659.5	0.0192	R.SLHK[425.27]EHLTEGGNM[147.04]AFHNHLNDFAHIEDPLER.R	YML123C	3920.87	126.127	47192.5	127.13	9144.09	51103.4	5562.04	0.108839	9.18789
0.9957	JL033021_040221_RPA2HFH_Q2_10to1_100B.14755.14755.5	6.78e-06	F.RK[425.27]EQC[160.03]VLQYVFHSRPNLSR.K	YOR341W	2713.43	126.127	48563.7	127.13	6743.8	52610.2	2866.84	0.054492	18.3513
0.9914	JL033021_040221_RPA2HFH_Q2_10to1_100B.14799.14799.6	0.00238	F.RK[425.27]EQC[160.03]VLQYVFHSRPNLSR.K	YOR341W	2713.43	126.127	111110	127.13	13864.5	120381	4882.33	0.0405573	24.6565
0.9991	JL033021_040221_RPA2HFH_Q2_10to1_100B.14837.14837.4	0.0103	R.LVK[425.27]ALEDIM[147.04]VHYDNTTR.N	RPB1-msCTD,YDL140C	2330.2	126.127	30512.4	127.13	9518.32	33011.3	7460.47	0.225998	4.42482
1	JL033021_040221_RPA2HFH_Q2_10to1_100B.14842.14842.4	0.00652	R.LVK[425.27]ALEDIM[147.04]VHYDNTTR.N	RPB1-msCTD,YDL140C	2330.2	126.127	27389	127.13	8671.53	29631.1	6833.47	0.230618	4.33617
1	JL033021_040221_RPA2HFH_Q2_10to1_100B.14893.14893.4	8.51e-05	R.LVK[425.27]ALEDIM[147.04]VHYDNTTR.N	RPB1-msCTD,YDL140C	2330.2	126.127	32147	127.13	8833.79	34789.6	6580.2	0.189143	5.28702
0.9978	JL033021_040221_RPA2HFH_Q2_10to1_100B.14939.14939.5	9.05e-06	F.RK[425.27]EQC[160.03]VLQYVFHSRPNLSR.K	YOR341W	2713.43	126.127	52117.5	127.13	7685.88	56456.5	3557.31	0.0630099	15.8705
0.9983	JL033021_040221_RPA2HFH_Q2_10to1_100B.15065.15065.5	4.87e-05	F.RK[425.27]EQC[160.03]VLQYVFHSRPNLSR.K	YOR341W	2713.43	126.127	36492.9	127.13	6396.95	39522.7	3578.79	0.0905501	11.0436
1	JL033021_040221_RPA2HFH_Q2_10to1_100B.15091.15091.3	1.74e-07	K.LSVSVEQVSIAK[425.27]PM[147.04]SNDGVSSAVER.K	YPR010C	2901.48	126.126	40872.4	127.13	7830.93	44260.3	4722.25	0.106693	9.37271
1	JL033021_040221_RPA2HFH_Q2_10to1_100B.15094.15094.3	2.53e-08	K.LSVSVEQVSIAK[425.27]PM[147.04]SNDGVSSAVER.K	YPR010C	2901.48	126.126	45203.3	127.13	7927.47	48956.3	4436.9	0.0906298	11.0339
1	JL033021_040221_RPA2HFH_Q2_10to1_100B.15149.15149.4	0.000717	M.GK[407.26]IAEFLGNPGARPDVHHR.A	YMR319C	2349.25	126.127	45389.7	127.131	8823.8	49151	5380.66	0.109472	9.13476
1	JL033021_040221_RPA2HFH_Q2_10to1_100B.15403.15403.5	2.89e-05	R.K[425.27]EQC[160.03]VLQYVFHSRPNLSR.K	YOR341W	2557.33	126.127	45351.6	127.13	6767.75	49126.7	3180.85	0.064748	15.4445
1	JL033021_040221_RPA2HFH_Q2_10to1_100B.15459.15459.4	1.39e-10	R.K[425.27]EQC[160.03]VLQYVFHSRPNLSR.K	YOR341W	2557.33	126.127	85963.2	127.131	14248.3	93107	7551.08	0.0811011	12.3303
0.9785	JL033021_040221_RPA2HFH_Q2_10to1_100B.15460.15460.5	0.473	R.EK[425.27]AIFEILNK[407.26]SNYDTNR.K	YOR270C	2630.39	126.127	60677.7	127.131	10735.3	65714.6	6056.58	0.0921649	10.8501
0.9875	JL033021_040221_RPA2HFH_Q2_10to1_100B.15553.15553.5	0.105	K.LRPGQEISLK[425.27]AHC[160.03]ILGIGGDHAK.F	YPR110C	2766.5	126.127	29231.1	127.13	3686.28	31669.9	1325.99	0.0418691	23.884
0.9813	JL033021_040221_RPA2HFH_Q2_10to1_100B.15583.15583.3	0.0348	K.HAFVK[407.26]VYSRHEAENVLQNFNKD.G	YNL251C	2923.48	126.127	30318	127.131	5461.8	32833.9	3131.04	0.09536	10.4866
0.9972	JL033021_040221_RPA2HFH_Q2_10to1_100B.15587.15587.3	2.36e-06	R.LGEHNIDVLEGNEQFINAAK[407.26]IITH.P	TRYP_PIG	2953.54	126.127	26978.5	127.131	4944.66	29216.7	2876.66	0.0984597	10.1564
0.999	JL033021_040221_RPA2HFH_Q2_10to1_100B.15607.15607.3	0.000224	R.LGEHNIDVLEGNEQFINAAK[407.26]IITH.P	TRYP_PIG	2953.54	126.127	25496.7	127.13	5851.4	27602.2	3981.34	0.14424	6.93289
0.9995	JL033021_040221_RPA2HFH_Q2_10to1_100B.15613.15613.3	2.24e-05	R.LGEHNIDVLEGNEQFINAAK[425.27]IITHPNF.N	TRYP_PIG	3329.71	126.127	15428.5	127.13	4057.48	16698.3	2962.86	0.177435	5.63586
0.9848	JL033021_040221_RPA2HFH_Q2_10to1_100B.15628.15628.3	0.0519	D.TTFSDFK[407.26]EVEDFLHFIVAEYIQQK.K	YER022W	3212.62	126.127	20698.1	127.13	3726.41	22415.7	2135.02	0.0952467	10.4991
1	JL033021_040221_RPA2HFH_Q2_10to1_100B.15638.15638.3	3.05e-05	R.LGEHNIDVLEGNEQFINAAK[425.27].L	TRYP_PIG	2507.27	126.128	43117.9	127.131	8120.76	46693.1	4831.25	0.103468	9.66481
1	JL033021_040221_RPA2HFH_Q2_10to1_100B.15651.15651.3	0.00124	R.LGEHNIDVLEGNEQFINAAK[407.26].L	TRYP_PIG	2489.26	126.127	50794.6	127.13	9627.79	55005.8	5756.99	0.104661	9.55462
0.9983	JL033021_040221_RPA2HFH_Q2_10to1_100B.15699.15699.5	0.000602	K.LRPGQEISLK[425.27]AHC[160.03]ILGIGGDHAK.F	YPR110C	2766.5	126.127	17265.9	127.13	3285.18	18697.3	1970.33	0.105381	9.48941
0.9536	JL033021_040221_RPA2HFH_Q2_10to1_100B.15749.15749.3	0.3	K.INVASLYTELGMIEENQSFK[425.27].E	DECOY_YER075C_UNMAPPED	2582.3	126.127	39435.3	127.13	6372.77	42713.8	3288.73	0.0769945	12.9879
1	JL033021_040221_RPA2HFH_Q2_10to1_100B.15783.15783.3	0.000198	K.K[425.27]DFEVNISSLDAR.E	YPR110C	1789.93	126.127	45460.6	127.13	8330.5	49232	4845.68	0.0984254	10.16
1	JL033021_040221_RPA2HFH_Q2_10to1_100B.16067.16067.3	6.41e-05	K.VIFDGK[425.27]PLNSEDEISNSGYLGNK.L	YPR010C	2792.39	126.127	37140.1	127.13	7111.71	40218.7	4286.61	0.106582	9.38241
1	JL033021_040221_RPA2HFH_Q2_10to1_100B.16081.16081.3	3.04e-10	K.VIFDGK[425.27]PLNSEDEISNSGYLGNK.L	YPR010C	2792.39	126.127	40952.1	127.13	8682.19	44339.8	5627.29	0.126913	7.87942
0.9998	JL033021_040221_RPA2HFH_Q2_10to1_100B.16111.16111.5	5.17e-07	K.LRPGQEISLK[425.27]AHC[160.03]ILGIGGDHAK.F	YPR110C	2766.5	126.126	18859.4	127.13	3826.7	20420.9	2407.56	0.117897	8.482
0.9999	JL033021_040221_RPA2HFH_Q2_10to1_100B.16116.16116.5	5.88e-06	K.LRPGQEISLK[425.27]AHC[160.03]ILGIGGDHAK.F	YPR110C	2766.5	126.127	17825.2	127.13	3416.92	19302.7	2061.3	0.106788	9.36435
0.9701	JL033021_040221_RPA2HFH_Q2_10to1_100B.16216.16216.4	1.23	R.GFGYGTM[147.04]YK[425.27]TEK[425.27]VDLALNR.N	YPR010C	2772.43	126.127	55603.3	127.13	11257.3	60207.3	7071.41	0.117451	8.51419
1	JL033021_040221_RPA2HFH_Q2_10to1_100B.16245.16245.4	4.4e-05	K.LRPGQEISLK[425.27]AHC[160.03]ILGIGGDHAK.F	YPR110C	2766.5	126.127	31645.4	127.131	5510.8	34273.1	3064.38	0.0894106	11.1844
0.9996	JL033021_040221_RPA2HFH_Q2_10to1_100B.16273.16273.4	0.0251	K.LRPGQEISLK[425.27]AHC[160.03]ILGIGGDHAK.F	YPR110C	2766.5	126.128	29960.1	127.131	5733.33	32443.5	3454.13	0.106466	9.39268
1	JL033021_040221_RPA2HFH_Q2_10to1_100B.16282.16282.5	2.41e-06	K.LRPGQEISLK[425.27]AHC[160.03]ILGIGGDHAK.F	YPR110C	2766.5	126.127	19876.2	127.13	3575.62	21525.6	2047.23	0.0951068	10.5145
0.9996	JL033021_040221_RPA2HFH_Q2_10to1_100B.16314.16314.5	6.35e-05	K.LRPGQEISLK[425.27]AHC[160.03]ILGIGGDHAK.F	YPR110C	2766.5	126.127	17757.9	127.13	3073.18	19232.6	1698.98	0.0883384	11.3201
1	JL033021_040221_RPA2HFH_Q2_10to1_100B.16397.16397.3	1.31e-05	K.FK[425.27]PHELENAEFLLR.A	YGR032W,YLR342W	2039.09	126.127	32954.3	127.13	5526.85	35692.4	2964.07	0.0830448	12.0417
1	JL033021_040221_RPA2HFH_Q2_10to1_100B.16406.16406.3	0.000477	K.FK[425.27]PHELENAEFLLR.A	YGR032W,YLR342W	2039.09	126.127	33896.5	127.13	6061.02	36709.8	3451.89	0.094032	10.6347
0.9985	JL033021_040221_RPA2HFH_Q2_10to1_100B.16482.16482.3	0.0273	K.FK[425.27]PHELENAEFLLR.A	YGR032W,YLR342W	2039.09	126.127	34974.6	127.13	5620.37	37882.5	2882.92	0.0761015	13.1403
0.9999	JL033021_040221_RPA2HFH_Q2_10to1_100B.16576.16576.3	0.00143	R.VTNTTSTDFPGFSK[425.27]DAENEWNVEK.F	YPR110C	3012.41	126.127	30816.7	127.13	5123.65	33377.5	2723.91	0.0816089	12.2536
0.9745	JL033021_040221_RPA2HFH_Q2_10to1_100B.16906.16906.6	0.0157	T.EVKNILDTVFRK[407.26]EQC[160.03]VLQYVFHSRPNLSR.K	YOR341W	3854.05	126.127	24683.5	127.13	4282.69	26733.2	2373.34	0.0887788	11.2639
1	JL033021_040221_RPA2HFH_Q2_10to1_100B.16979.16979.3	4.9e-06	K.LDK[425.27]SQVDEIVLVGGSTR.L	YAL005C,YLL024C	2112.15	126.127	29064.1	127.13	5236.78	31476	3002.47	0.0953893	10.4834
1	JL033021_040221_RPA2HFH_Q2_10to1_100B.16995.16995.3	7.25e-07	K.LDK[425.27]SQVDEIVLVGGSTR.L	YAL005C,YLL024C	2112.15	126.127	30123.5	127.13	5728.41	32620.8	3434.18	0.105276	9.49884
0.9999	JL033021_040221_RPA2HFH_Q2_10to1_100B.17045.17045.3	0.00188	R.GSFFAQLK[425.27]TTTVR.K	YPR010C	1751.97	126.127	29417.6	127.13	6631.75	31847.8	4465.56	0.140216	7.13187
0.967	JL033021_040221_RPA2HFH_Q2_10to1_100B.17048.17048.3	0.0194	R.GSFFAQLK[425.27]TTTVR.K	YPR010C	1751.97	126.127	33375.4	127.13	5899.3	36146	3325.38	0.0919985	10.8697
0.99	JL033021_040221_RPA2HFH_Q2_10to1_100B.17097.17097.4	0.693	R.TLSDYNIQK[425.27]ESTLHLVLR.L	YIL148W,YKR094C,YLL039C,YLR167W	2426.32	126.127	26426.3	127.13	4425.05	28622	2369.44	0.0827837	12.0797
0.998	JL033021_040221_RPA2HFH_Q2_10to1_100B.17280.17280.3	0.0099	K.YFEVILVDPQHK[425.27]AIR.R	YLR029C,YMR121C	2124.18	126.127	27835.9	127.13	4650.19	30148.9	2484.14	0.0823958	12.1365
1	JL033021_040221_RPA2HFH_Q2_10to1_100B.17336.17336.3	0.00477	R.NLNNLK[425.27]QENAYLLIR.R	YOR224C	2112.18	126.127	34189.4	127.13	6647.33	37022.5	4053.88	0.109498	9.13262
1	JL033021_040221_RPA2HFH_Q2_10to1_100B.17356.17356.3	3.81e-05	K.IITHPNFNGNTLDNDIM[147.04]LIK[425.27].L	TRYP_PIG	2595.34	126.128	27435.5	127.131	4896.88	29712.7	2784.44	0.0937123	10.671
1	JL033021_040221_RPA2HFH_Q2_10to1_100B.17357.17357.3	6.78e-05	R.NLNNLK[425.27]QENAYLLIR.R	YOR224C	2112.18	126.127	57505.4	127.131	13405.3	62252.3	9202.49	0.147826	6.76472
1	JL033021_040221_RPA2HFH_Q2_10to1_100B.17393.17393.4	0.000717	R.LAK[425.27]FK[425.27]PHELENAEFLLR.A	YGR032W,YLR342W	2648.49	126.127	23223.4	127.13	5645.35	25138.6	3964.62	0.15771	6.34073
1	JL033021_040221_RPA2HFH_Q2_10to1_100B.17509.17509.3	0.000464	R.NLNNLK[425.27]QENAYLLIR.R	YOR224C	2112.18	126.128	31950.1	127.131	6270.33	34597.2	3850.92	0.111307	8.98413
1	JL033021_040221_RPA2HFH_Q2_10to1_100B.17608.17608.4	8.95e-05	R.SAIEHTTLK[425.27]SVTIASEIYYDPDPR.S	RPB1-msCTD,YDL140C	3002.53	126.127	17868.9	127.13	4081.2	19344.7	2769.19	0.14315	6.98567
1	JL033021_040221_RPA2HFH_Q2_10to1_100B.17667.17667.4	2.5e-08	R.SAIEHTTLK[425.27]SVTIASEIYYDPDPR.S	RPB1-msCTD,YDL140C	3002.53	126.127	20398.4	127.131	7864.86	22056.6	6596.61	0.299076	3.34363
0.9978	JL033021_040221_RPA2HFH_Q2_10to1_100B.17672.17672.3	0.00402	V.EEDTK[407.26]IDTLELVENNKPHPR.M	YDL129W	2655.36	126.126	21615.5	127.13	3342.77	23413.8	1641.57	0.0701114	14.263
1	JL033021_040221_RPA2HFH_Q2_10to1_100B.17673.17673.4	1.56e-09	R.SAIEHTTLK[425.27]SVTIASEIYYDPDPR.S	RPB1-msCTD,YDL140C	3002.53	126.127	19713.8	127.131	6654.52	21324.1	5361.1	0.25141	3.97757
1	JL033021_040221_RPA2HFH_Q2_10to1_100B.17772.17772.4	1.16e-08	R.SAIEHTTLK[425.27]SVTIASEIYYDPDPR.S	RPB1-msCTD,YDL140C	3002.53	126.127	23072.3	127.131	7809.8	24956.8	6297.57	0.252339	3.96292
1	JL033021_040221_RPA2HFH_Q2_10to1_100B.17798.17798.4	0.000407	R.SAIEHTTLK[425.27]SVTIASEIYYDPDPR.S	RPB1-msCTD,YDL140C	3002.53	126.127	16861	127.13	5653.38	18238.6	4544.4	0.249164	4.01342
1	JL033021_040221_RPA2HFH_Q2_10to1_100B.17807.17807.3	0.0144	R.ISPK[425.27]ILDEFYDR.A	YBR127C	1791.95	126.127	17516.8	127.131	2117.97	18979	697.04	0.036727	27.2279
1	JL033021_040221_RPA2HFH_Q2_10to1_100B.17843.17843.4	5.34e-05	R.SAIEHTTLK[425.27]SVTIASEIYYDPDPR.S	RPB1-msCTD,YDL140C	3002.53	126.127	18367.6	127.13	4001.71	19886.1	2639.25	0.132718	7.53475
0.9834	JL033021_040221_RPA2HFH_Q2_10to1_100B.17852.17852.4	0.0562	R.SAIEHTTLK[425.27]SVTIASEIYYDPDPR.S	RPB1-msCTD,YDL140C	3002.53	126.127	21294.9	127.13	3784.85	23062.5	2144.07	0.0929679	10.7564
0.9996	JL033021_040221_RPA2HFH_Q2_10to1_100B.17869.17869.3	0.00538	R.SFQSFAWRNGEMEK[425.27]Q.F	YIL115C	2141.01	126.127	25198.4	127.13	4691.97	27288.3	2765.69	0.101351	9.86669
1	JL033021_040221_RPA2HFH_Q2_10to1_100B.17895.17895.3	3.23e-05	R.IVVGK[425.27]LNNVGTGSFDVLAK.V	YOR341W	2227.27	126.127	29266.9	127.13	5590.54	31693	3363.35	0.106123	9.42303
0.9972	JL033021_040221_RPA2HFH_Q2_10to1_100B.18057.18057.3	1.25e-11	R.DAK[407.26]LDKSQVDEIVLVGGSTR.L	YAL005C,YLL024C	2408.3	126.127	32168.1	127.131	6659.39	34830.4	4248.26	0.12197	8.19875
0.9627	JL033021_040221_RPA2HFH_Q2_10to1_100B.18111.18111.5	0.00711	K.LRPGQEISLK[425.27]AHC[160.03]ILGIGGDHAKFSPVSTASYR.L	YPR110C	3862.04	126.127	24420.4	127.13	4905.97	26442.7	3064.86	0.115906	8.62771
1	JL033021_040221_RPA2HFH_Q2_10to1_100B.18125.18125.3	3.03e-06	R.EGLIDTAVK[425.27]TAETGYIQR.R	RPB1-msCTD,YDL140C	2261.2	126.127	28813.9	127.13	8989.26	31173.7	7046.02	0.226024	4.4243
1	JL033021_040221_RPA2HFH_Q2_10to1_100B.18145.18145.3	7.73e-05	R.EGLIDTAVK[425.27]TAETGYIQR.R	RPB1-msCTD,YDL140C	2261.2	126.127	33236.3	127.13	11689.8	35947.4	9542.83	0.265466	3.76696
1	JL033021_040221_RPA2HFH_Q2_10to1_100B.18156.18156.3	3.65e-05	R.EGLIDTAVK[425.27]TAETGYIQR.R	RPB1-msCTD,YDL140C	2261.2	126.127	30175.7	127.13	10146	32640.9	8163.34	0.250095	3.99848
0.9903	JL033021_040221_RPA2HFH_Q2_10to1_100B.18278.18278.3	0.15	K.ELAEKK[407.26]IPLVIR.R	YPR187W	1687.05	126.127	20219.4	127.131	4343.87	21891.5	2839.66	0.129715	7.70919
1	JL033021_040221_RPA2HFH_Q2_10to1_100B.18326.18326.3	0.00734	R.SEYVDM[147.04]AIAK[425.27]ALSDGR.T	YOR341W	2038.01	126.127	29836.3	127.13	6300.14	32304.6	4072.63	0.12607	7.93213
0.9956	JL033021_040221_RPA2HFH_Q2_10to1_100B.18340.18340.3	9.82e-08	K.FK[407.26]KDFEVNISSLDAR.E	YPR110C	2047.08	126.127	29338.6	127.13	4868.43	31776.7	2583.11	0.0812893	12.3017
0.9681	JL033021_040221_RPA2HFH_Q2_10to1_100B.18419.18419.3	0.25	R.LGGNPKLNLRAQQELRK[425.27].R	DECOY_YLR371W_UNMAPPED	2231.29	126.127	18394.4	127.131	3685.37	19917.8	2297.86	0.115367	8.66796
1	JL033021_040221_RPA2HFH_Q2_10to1_100B.18505.18505.3	4.2e-05	R.SEYVDM[147.04]AIAK[425.27]ALSDGR.T	YOR341W	2038.01	126.127	29439.9	127.13	6595.38	31872.3	4424.59	0.138823	7.20344
1	JL033021_040221_RPA2HFH_Q2_10to1_100B.18543.18543.3	0.0045	R.TVK[425.27]EVQFGLFSPEEVR.A	RPB1-msCTD,YDL140C	2161.15	126.127	21387.1	127.13	5071.12	23151.9	3514.13	0.151786	6.58823
1	JL033021_040221_RPA2HFH_Q2_10to1_100B.18560.18560.3	0.00233	R.TVK[425.27]EVQFGLFSPEEVR.A	RPB1-msCTD,YDL140C	2161.15	126.127	20762.9	127.13	5966.76	22467.6	4529.92	0.20162	4.95982
1	JL033021_040221_RPA2HFH_Q2_10to1_100B.18593.18593.4	0.000436	R.ELK[425.27]YELIAEESEDDSESGK[425.27]VFIGR.L	YOR151C	3336.68	126.127	18087.9	127.13	6786.22	19559.8	5648.19	0.288764	3.46303
1	JL033021_040221_RPA2HFH_Q2_10to1_100B.18626.18626.3	4.64e-11	R.K[425.27]VFQM[147.04]NYFSDGLFAEDEYQR.Y	YGL244W	2799.29	126.127	22406.3	127.13	4956.59	24258.1	3299.91	0.136034	7.35113
1	JL033021_040221_RPA2HFH_Q2_10to1_100B.18642.18642.3	1.1e-12	R.K[425.27]VFQM[147.04]NYFSDGLFAEDEYQR.Y	YGL244W	2799.29	126.127	25629.2	127.13	5538.46	27748.4	3634.11	0.130966	7.63555
1	JL033021_040221_RPA2HFH_Q2_10to1_100B.18649.18649.3	3.47e-13	R.K[425.27]VFQM[147.04]NYFSDGLFAEDEYQR.Y	YGL244W	2799.29	126.127	24388.2	127.13	4596.19	26410.4	2735.79	0.103588	9.65367
1	JL033021_040221_RPA2HFH_Q2_10to1_100B.18702.18702.4	1.83e-08	K.IK[425.27]LLTQATSEDGTSASFQIVEEDHTLGNALR.Y	YNL113W	3640.87	126.127	19688.3	127.13	3953.14	21318.8	2468.63	0.115796	8.63588
1	JL033021_040221_RPA2HFH_Q2_10to1_100B.18887.18887.3	1.5e-05	K.SQFSNLK[425.27]VVTTTADDAFPSSLR.A	YJR063W	2680.38	126.127	18332	127.13	3538.89	19851.3	2146.5	0.108129	9.24822
0.9967	JL033021_040221_RPA2HFH_Q2_10to1_100B.18898.18898.3	0.042	R.ADPVALYLGLK[425.27]R.G	YBR154C	1611.94	126.127	28245.6	127.131	5530.18	30585.9	3390.36	0.110847	9.02143
1	JL033021_040221_RPA2HFH_Q2_10to1_100B.18915.18915.3	0.00567	R.ADPVALYLGLK[425.27]R.G	YBR154C	1611.94	126.127	29968.6	127.13	6381.91	32447.4	4148.37	0.127849	7.82171
1	JL033021_040221_RPA2HFH_Q2_10to1_100B.18937.18937.3	0.0193	R.ADPVALYLGLK[425.27]R.G	YBR154C	1611.94	126.127	30399.9	127.131	6015.74	32918.1	3717.27	0.112925	8.85545
0.9943	JL033021_040221_RPA2HFH_Q2_10to1_100B.18951.18951.3	1.12	R.ADPVALYLGLK[425.27]R.G	YBR154C	1611.94	126.127	24483	127.13	6297.1	26499.2	4549.94	0.171701	5.82407
1	JL033021_040221_RPA2HFH_Q2_10to1_100B.18999.18999.3	3.13e-09	K.SQFSNLK[425.27]VVTTTADDAFPSSLR.A	YJR063W	2680.38	126.127	23467	127.13	4372.2	25413.2	2578.47	0.101462	9.85593
0.9811	JL033021_040221_RPA2HFH_Q2_10to1_100B.19087.19087.4	0.251	R.IVQIM[147.04]QNPTHYK[425.27]IPAWFLNR.Q	YDR450W,YML026C	2781.49	126.127	22705.9	127.13	4279.94	24588.6	2547.93	0.103623	9.6504
1	JL033021_040221_RPA2HFH_Q2_10to1_100B.19113.19113.4	0.00575	R.IVQIM[147.04]QNPTHYK[425.27]IPAWFLNR.Q	YDR450W,YML026C	2781.49	126.127	30253.8	127.13	5493.32	32764	3170.57	0.0967699	10.3338
1	JL033021_040221_RPA2HFH_Q2_10to1_100B.19543.19543.3	1.85e-05	R.K[425.27]NEYLVPVVM[147.04]ILK.A	YPR010C	1858.07	126.127	28749.3	127.13	5048.3	31136.2	2828.76	0.0908513	11.007
1	JL033021_040221_RPA2HFH_Q2_10to1_100B.19613.19613.4	0.000687	R.K[425.27]TLEEINELYHDEIDPATLNFR.N	YML123C	2956.49	126.126	14064.1	127.13	2412.3	15232.2	1322.4	0.0868162	11.5186
1	JL033021_040221_RPA2HFH_Q2_10to1_100B.19851.19851.3	0.000928	K.VEGK[425.27]TPGLPIDLEIGYVPPSTR.G	YPR010C	2634.43	126.127	15001.7	127.13	3143.17	16242.9	2021.42	0.124449	8.03539
1	JL033021_040221_RPA2HFH_Q2_10to1_100B.19866.19866.3	4.13e-10	K.VEGK[425.27]TPGLPIDLEIGYVPPSTR.G	YPR010C	2634.43	126.127	19225.8	127.13	3934.32	20817.4	2489.99	0.119611	8.3604
1	JL033021_040221_RPA2HFH_Q2_10to1_100B.20046.20046.3	2.75e-10	K.VEGK[425.27]TPGLPIDLEIGYVPPSTR.G	YPR010C	2634.43	126.127	23270.9	127.13	4664.21	25198.1	2908.99	0.115445	8.66216
1	JL033021_040221_RPA2HFH_Q2_10to1_100B.20101.20101.3	4.97e-12	K.VEGK[425.27]TPGLPIDLEIGYVPPSTR.G	YPR010C	2634.43	126.127	18838.2	127.13	4847.45	20389.5	3503.29	0.171818	5.8201
0.9924	JL033021_040221_RPA2HFH_Q2_10to1_100B.20135.20135.3	0.00222	G.DK[425.27]WESYLNLLQEDELDEGTALSR.L	YOR210W	3020.47	126.127	11314	127.13	3230.32	12243.1	2445.86	0.199774	5.00564
0.9646	JL033021_040221_RPA2HFH_Q2_10to1_100B.20225.20225.3	0.00736	K.VEGK[425.27]TPGLPIDLEIGYVPPSTR.G	YPR010C	2634.43	126.127	13449.3	127.13	3755.83	14554.4	2817.3	0.19357	5.1661
1	JL033021_040221_RPA2HFH_Q2_10to1_100B.20352.20352.3	7.84e-06	G.DK[425.27]WESYLNLLQEDELDEGTALSR.L	YOR210W	3020.47	126.127	9201.88	127.13	2355.19	9959.75	1697.7	0.170456	5.86662
0.9854	JL033021_040221_RPA2HFH_Q2_10to1_100B.20393.20393.3	0.642	R.KHSVPNISM[147.04]NALDM[147.04]TREASC[160.03]K[407.26].S	YCR073W-A	2699.29	126.127	11599.5	127.13	3067.61	12554	2245.88	0.178897	5.5898
1	JL033021_040221_RPA2HFH_Q2_10to1_100B.20881.20881.3	7.99e-05	R.IVVGK[425.27]LNNVGTGSFDVLAK[425.27]VPNAA.-	YOR341W	2976.68	126.127	19426.9	127.13	3738.1	21037	2261.67	0.107509	9.30156
1	JL033021_040221_RPA2HFH_Q2_10to1_100B.20884.20884.3	0.00409	R.IVVGK[425.27]LNNVGTGSFDVLAK[425.27]VPNAA.-	YOR341W	2976.68	126.127	20697.6	127.13	5497.71	22400.6	4033.16	0.180046	5.55412
0.9991	JL033021_040221_RPA2HFH_Q2_10to1_100B.20924.20924.3	0.00377	R.IDSDK[425.27]LTDSAIDIVDSVR.T	YNL248C	2258.17	126.127	11416.1	127.13	1694.33	12366.4	790.753	0.0639435	15.6388
0.9999	JL033021_040221_RPA2HFH_Q2_10to1_100B.21047.21047.3	0.0181	K.DGFTK[425.27]IFETALNEK.Q	YOR341W	1908.99	126.127	8936.22	127.13	1888.67	9675.49	1221.63	0.126261	7.92012
1	JL033021_040221_RPA2HFH_Q2_10to1_100B.21064.21064.3	0.00694	K.DGFTK[425.27]IFETALNEK.Q	YOR341W	1908.99	126.127	8525.08			9245.19	-765.321	-0.0827804	-12.0802
1	JL033021_040221_RPA2HFH_Q2_10to1_100B.21136.21136.3	3.52e-07	R.NHFIFNVESAGAM[147.04]TPEEIFFK[425.27].S	YPR110C	2740.33	126.127	9053.78	127.13	1618.76	9805.21	921.855	0.0940169	10.6364
0.9997	JL033021_040221_RPA2HFH_Q2_10to1_100B.21139.21139.3	0.00339	R.NHFIFNVESAGAMTPEEIFFK[425.27].S	YPR110C	2724.33	126.127	10443.9	127.13	2653.76	11304.3	1906.14	0.168621	5.93044
0.996	JL033021_040221_RPA2HFH_Q2_10to1_100B.21140.21140.3	2.15e-05	R.NHFIFNVESAGAM[147.04]TPEEIFFK[425.27]S.V	YPR110C	2827.36	126.127	9777.26	127.13	2969.63	10578.7	2304.47	0.217841	4.5905
0.9998	JL033021_040221_RPA2HFH_Q2_10to1_100B.21144.21144.3	6.95e-05	R.NHFIFNVESAGAMTPEEIFFK[425.27]S.V	YPR110C	2811.37	126.127	9048.13	127.13	2898.49	9788.53	2293.69	0.234325	4.26758
1	JL033021_040221_RPA2HFH_Q2_10to1_100B.21157.21157.3	8.96e-06	R.NHFIFNVESAGAMTPEEIFFK[425.27]S.V	YPR110C	2811.37	126.127	7580.92	127.13	2257.1	8202.67	1738.11	0.211895	4.71932
1	JL033021_040221_RPA2HFH_Q2_10to1_100B.21159.21159.3	0.000234	R.NHFIFNVESAGAMTPEEIFFK[425.27].S	YPR110C	2724.33	126.127	9553.83	127.13	3055.96	10335.7	2417.03	0.233854	4.27617
1	JL033021_040221_RPA2HFH_Q2_10to1_100B.21179.21179.3	0.000218	R.NHFIFNVESAGAM[147.04]TPEEIFFK[425.27].S	YPR110C	2740.33	126.127	8234.37	127.13	2019.86	8913.28	1425.22	0.159899	6.25395
1	JL033021_040221_RPA2HFH_Q2_10to1_100B.21229.21229.3	9.14e-05	R.EASK[425.27]DNVDFILSNVDLAM[147.04]ANSLR.R	YIL021W	2834.42	126.127	7908.38	127.13	2239.46	8557.94	1689.8	0.197454	5.06446
1	JL033021_040221_RPA2HFH_Q2_10to1_100B.21234.21234.4	5.55e-05	R.SK[425.27]IVTLPPTIFKPYPLWTGK.Q	YOR341W	2582.5	126.127	7427.6	127.131	1732.31	8040.73	1189.51	0.147936	6.7597
1	JL033021_040221_RPA2HFH_Q2_10to1_100B.21255.21255.3	7.63e-07	R.EASK[425.27]DNVDFILSNVDLAM[147.04]ANSLR.R	YIL021W	2834.42	126.127	8754.21	127.13	3865.77	9461.81	3356.6	0.354752	2.81887
1	JL033021_040221_RPA2HFH_Q2_10to1_100B.21266.21266.4	5.98e-05	R.SK[425.27]IVTLPPTIFKPYPLWTGK.Q	YOR341W	2582.5	126.127	10882.6	127.131	1218.08	11791.8	328.316	0.0278428	35.916
0.9936	JL033021_040221_RPA2HFH_Q2_10to1_100B.21270.21270.3	0.01	R.SK[425.27]IVTLPPTIFKPYPLWTGK.Q	YOR341W	2582.5	126.127	12015.9	127.13	2544.39	13009.9	1647.82	0.126659	7.89521
1	JL033021_040221_RPA2HFH_Q2_10to1_100B.21286.21286.4	2.09e-07	R.SK[425.27]IVTLPPTIFKPYPLWTGK.Q	YOR341W	2582.5	126.127	7853.44	127.131	1453.83	8504.83	852.875	0.100281	9.97195
1	JL033021_040221_RPA2HFH_Q2_10to1_100B.21335.21335.4	1.02e-06	R.SK[425.27]IVTLPPTIFKPYPLWTGK.Q	YOR341W	2582.5	126.127	8750.4	127.131	1396.93	9478.03	711.372	0.0750549	13.3236
0.9968	JL033021_040221_RPA2HFH_Q2_10to1_100B.21448.21448.3	0.0681	R.AALYK[425.27]EVYNVIASDGSYVNYR.H	RPB1-msCTD,YDL140C	2691.36	126.127	11813	127.13	4416.87	12774.4	3672.55	0.287494	3.47834
0.9999	JL033021_040221_RPA2HFH_Q2_10to1_100B.21460.21460.3	0.0027	R.AALYK[425.27]EVYNVIASDGSYVNYR.H	RPB1-msCTD,YDL140C	2691.36	126.127	13146.4	127.13	4066.21	14223.4	3177.09	0.223371	4.47686
1	JL033021_040221_RPA2HFH_Q2_10to1_100B.21478.21478.3	0.0021	R.EIFDGIIGNDVK[425.27]DSFLTDR.L	YPR010C	2450.24	126.127	15828.1	127.13	3126.95	17139.3	1929.85	0.112598	8.88116
1	JL033021_040221_RPA2HFH_Q2_10to1_100B.21480.21480.4	4.59e-12	R.K[425.27]WPTIDM[147.04]PFSETGIQPDIIINPHAFPSR.M	YPR010C	3519.79	126.127	10442.9	127.131	2158.62	11307.2	1375.65	0.121662	8.21952
0.991	JL033021_040221_RPA2HFH_Q2_10to1_100B.21509.21509.4	0.0121	R.M[147.04]ILTHVDLIEK[425.27]FLR.Y	YOR210W	2040.15	126.128	48376.7	127.131	9072.98	52388.2	5379.53	0.102686	9.73844
0.9994	JL033021_040221_RPA2HFH_Q2_10to1_100B.21646.21646.3	0.0274	R.M[147.04]ILTHVDLIEK[425.27]FLR.Y	YOR210W	2040.15	126.127	35392	127.13	7021.25	38323.6	4346.6	0.113418	8.81692
0.9544	JL033021_040221_RPA2HFH_Q2_10to1_100B.21720.21720.3	6.83e-05	R.GYFITQEEVELPLEDFK[425.27]AK.Y	YBR154C	2552.31	126.127	14796.2	127.13	3696.7	16015.6	2633.02	0.164404	6.08259
1	JL033021_040221_RPA2HFH_Q2_10to1_100B.21760.21760.3	1.78e-06	R.AALYK[425.27]EVYNVIASDGSYVNYR.H	RPB1-msCTD,YDL140C	2691.36	126.127	7957.74	127.13	3846.43	8598.22	3407.37	0.396288	2.52342
1	JL033021_040221_RPA2HFH_Q2_10to1_100B.21764.21764.3	0.000126	R.AALYK[425.27]EVYNVIASDGSYVNYR.H	RPB1-msCTD,YDL140C	2691.36	126.127	10829.2	127.13	3391.36	11716	2661.95	0.227206	4.40129
1	JL033021_040221_RPA2HFH_Q2_10to1_100B.21867.21867.4	0.113	R.AALYK[425.27]EVYNVIASDGSYVNYR.H	RPB1-msCTD,YDL140C	2691.36	126.127	3084.34	127.13	1756.31	3330.4	1605.14	0.481965	2.07484
1	JL033021_040221_RPA2HFH_Q2_10to1_100B.21908.21908.4	2.04e-09	R.NHFIFNVESAGAM[147.04]TPEEIFFK[425.27]SVR.L	YPR110C	3082.53	126.127	12500.9	127.13	2883.98	13533	1968.18	0.145436	6.8759
1	JL033021_040221_RPA2HFH_Q2_10to1_100B.21915.21915.4	3.36e-08	R.NHFIFNVESAGAM[147.04]TPEEIFFK[425.27]SVR.L	YPR110C	3082.53	126.127	15886.6	127.13	3962.29	17195.9	2819.73	0.163977	6.09843
1	JL033021_040221_RPA2HFH_Q2_10to1_100B.21944.21944.3	1.33e-12	R.AALYK[425.27]EVYNVIASDGSYVNYR.H	RPB1-msCTD,YDL140C	2691.36	126.127	13211.9	127.13	12231.5	14227.1	11921	0.837907	1.19345
0.9988	JL033021_040221_RPA2HFH_Q2_10to1_100B.21966.21966.3	0.0306	K.K[425.27]SEVFSTYADNQPGVLIQVFEGER.T	YER103W,YLL024C	3009.52	126.127	9544.3	127.13	3624.14	10320.6	3026.74	0.293271	3.40981
0.9999	JL033021_040221_RPA2HFH_Q2_10to1_100B.21991.21991.3	0.000229	R.NHFIFNVESAGAM[147.04]TPEEIFFK[425.27]SVR.L	YPR110C	3082.53	126.127	15090.5	127.13	4131.79	16331.1	3072.84	0.188159	5.31465
1	JL033021_040221_RPA2HFH_Q2_10to1_100B.22003.22003.3	2.04e-06	R.AALYK[425.27]EVYNVIASDGSYVNYR.H	RPB1-msCTD,YDL140C	2691.36	126.127	9846.11	127.13	4600.76	10639.9	4046.18	0.380284	2.62961
0.977	JL033021_040221_RPA2HFH_Q2_10to1_100B.22080.22080.3	9.14e-08	R.KLVK[407.26]ADSFFM[147.04]DVLVVPPTR.F	YOR341W	2456.36	126.127	11358.7	127.13	3209.7	12291.7	2419.76	0.196862	5.07971
1	JL033021_040221_RPA2HFH_Q2_10to1_100B.22264.22264.3	9.18e-06	K.VTK[425.27]TIAQDSFDILSFDDSNTLIR.K	YBL017C	2895.49	126.127	8601.88	127.13	3113.27	9302.81	2563.91	0.275605	3.62838
0.991	JL033021_040221_RPA2HFH_Q2_10to1_100B.22270.22270.3	2e-10	R.KLVK[407.26]ADSFFM[147.04]DVLVVPPTR.F	YOR341W	2456.36	126.127	17427.8	127.131	4491.88	18862.9	3248.88	0.172237	5.80597
1	JL033021_040221_RPA2HFH_Q2_10to1_100B.22299.22299.3	6.04e-07	K.VTK[425.27]TIAQDSFDILSFDDSNTLIR.K	YBL017C	2895.49	126.127	9738.97	127.13	3507.55	10532.7	2884.33	0.273845	3.65171
0.9999	JL033021_040221_RPA2HFH_Q2_10to1_100B.22347.22347.3	0.0159	R.LDQQIIIDK[425.27]LIPIANK.G	YGL009C	2131.27	126.127	6022.29	127.13	2316.54	6511.9	1941.73	0.298182	3.35366
0.9677	JL033021_040221_RPA2HFH_Q2_10to1_100B.22369.22369.3	2.52e-06	R.KLVK[407.26]ADSFFM[147.04]DVLVVPPTR.F	YOR341W	2456.36	126.127	12582.3	127.13	2601.24	13623.6	1657.89	0.121692	8.21745
0.9594	JL033021_040221_RPA2HFH_Q2_10to1_100B.22406.22406.3	1.59e-07	R.KLVK[407.26]ADSFFM[147.04]DVLVVPPTR.F	YOR341W	2456.36	126.127	9442.79	127.13	3346.57	10212.8	2738.42	0.268135	3.72947
0.981	JL033021_040221_RPA2HFH_Q2_10to1_100B.23012.23012.3	0.00389	V.INGPDK[425.27]WPGATQIQNEDGSLVSLIGM[147.04]SVEQR.K	YOR341W	3651.83	126.127	3406.64	127.13	1318.06	3683.54	1106.58	0.300413	3.32875
0.9995	JL033021_040221_RPA2HFH_Q2_10to1_100B.23066.23066.3	0.000793	K.EK[425.27]IDEYLQNIIAQVR.M	YPR010C	2128.16	126.127	5768.75	127.13	2015.85	6239.41	1642.27	0.263209	3.79927
1	JL033021_040221_RPA2HFH_Q2_10to1_100B.23485.23485.4	6.06e-09	R.IVSLPK[425.27]ADDIHHLLVLAIEPPLR.Q	YML069W	2855.67	126.127	5870.21	127.13	1748.85	6351.64	1347.05	0.212079	4.71523
1	JL033021_040221_RPA2HFH_Q2_10to1_100B.23545.23545.3	6.22e-07	K.VVGDK[425.27]WESYLNLLQEDELDEGTALSR.L	YOR210W	3275.63	126.127	6592.48	127.13	2217.13	7131.07	1784.01	0.250174	3.99721
0.9606	JL033021_040221_RPA2HFH_Q2_10to1_100B.23753.23753.4	8.87	K.LGEEVHENSQNQLLSK[425.27]VLTTSLLIR.D	YOR341W	3117.71	126.127	5779.47	127.13	2022	6250.99	1647.9	0.263623	3.7933
1	JL033021_040221_RPA2HFH_Q2_10to1_100B.24563.24563.4	0.0034	R.QAVINGPDK[407.26]WPGATQIQNEDGSLVSLIGM[147.04]SVEQR.K	YOR341W	3931.98	126.127	6282.83	127.13	2718.43	6791.13	2348.99	0.345891	2.89109
1	JL033021_040221_RPA2HFH_Q2_10to1_100B.25095.25095.3	0.000275	K.VLLSEVIDK[425.27]VIVTETTGTSNTAGGNAAR.S	YOR341W	3112.67	126.127	7247.52	127.13	3051.8	7834.56	2619.62	0.334367	2.99073
1	JL033021_040221_RPA2HFH_Q2_10to1_100B.25098.25098.3	6.84e-05	K.VLLSEVIDK[425.27]VIVTETTGTSNTAGGNAAR.S	YOR341W	3112.67	126.127	7127.28	127.13	3799.58	7698	3431.73	0.445795	2.24318
1	JL033021_040221_RPA2HFH_Q2_10to1_100B.25104.25104.3	4.43e-12	K.VLLSEVIDK[425.27]VIVTETTGTSNTAGGNAAR.S	YOR341W	3112.67	126.127	8822.04	127.13	3017.08	9542.37	2441.07	0.255814	3.90909
1	JL033021_040221_RPA2HFH_Q2_10to1_100B.25124.25124.4	6.62e-07	K.VLLSEVIDK[425.27]VIVTETTGTSNTAGGNAAR.S	YOR341W	3112.67	126.127	4573.25	127.13	908.758	4952.06	563.255	0.113741	8.79187
1	JL033021_040221_RPA2HFH_Q2_10to1_100B.25139.25139.4	1.41e-10	K.VLLSEVIDK[425.27]VIVTETTGTSNTAGGNAAR.S	YOR341W	3112.67	126.127	6039.85	127.13	1778.47	6535.37	1363.57	0.208644	4.79285
1	JL033021_040221_RPA2HFH_Q2_10to1_100B.25275.25275.3	4.17e-09	K.VLLSEVIDK[425.27]VIVTETTGTSNTAGGNAAR.S	YOR341W	3112.67	126.127	11247.6	127.13	4079.12	12164	3361.38	0.276338	3.61876
1	JL033021_040221_RPA2HFH_Q2_10to1_100B.25291.25291.3	2.34e-11	K.VLLSEVIDK[425.27]VIVTETTGTSNTAGGNAAR.S	YOR341W	3112.67	126.127	7588.87	127.13	3339.52	8202.37	2897.29	0.353227	2.83104
1	JL033021_040221_RPA2HFH_Q2_10to1_100B.25303.25303.4	5.41e-06	R.NLSAK[425.27]QITNPTVLDNLGHPVSGGLYDLALGAFLR.N	YOR341W	3861.09	126.127	5087.78	127.13	2409.7	5497.68	2125.45	0.386608	2.5866
1	JL033021_040221_RPA2HFH_Q2_10to1_100B.25308.25308.3	4.05e-11	K.VLLSEVIDK[425.27]VIVTETTGTSNTAGGNAAR.S	YOR341W	3112.67	126.127	8783.74	127.13	4003.58	9492.7	3501.62	0.368875	2.71094
1	JL033021_040221_RPA2HFH_Q2_10to1_100B.25347.25347.4	2.49e-11	R.NLSAK[425.27]QITNPTVLDNLGHPVSGGLYDLALGAFLR.N	YOR341W	3861.09	126.127	8055.35	127.13	3301.22	8708.57	2814.37	0.323173	3.09432
1	JL033021_040221_RPA2HFH_Q2_10to1_100B.27287.27287.3	8.85e-05	R.LM[147.04]NAFVTIQNDVNAFIDSTK[425.27]AQGR.T	YOR341W	2965.5	126.127	11650	127.13	5616.67	12587.8	4972.86	0.395054	2.5313
0.9742	JL033021_040221_RPA2HFH_Q2_10to1_100B.27294.27294.3	0.00414	R.LM[147.04]NAFVTIQNDVNAFIDSTK[425.27]AQGR.T	YOR341W	2965.5	126.127	11043.7	127.13	5400.83	11932.1	4796	0.401943	2.48792
1	JL033021_040221_RPA2HFH_Q2_10to1_100B.27300.27300.3	0.00193	R.LM[147.04]NAFVTIQNDVNAFIDSTK[425.27]AQGR.T	YOR341W	2965.5	126.127	12068.1	127.13	5286.2	13043.9	4581.21	0.351215	2.84726
1	JL033021_040221_RPA2HFH_Q2_10to1_100B.27317.27317.4	9.2e-06	R.LM[147.04]NAFVTIQNDVNAFIDSTK[425.27]AQGR.T	YOR341W	2965.5	126.127	7336.79	127.131	1715.03	7942.39	1179.15	0.148463	6.7357
0.9994	JL033021_040221_RPA2HFH_Q2_10to1_100B.27470.27470.3	0.00163	R.LM[147.04]NAFVTIQNDVNAFIDSTK[425.27]AQGR.T	YOR341W	2965.5	126.127	15327.2	127.13	5959.2	16572.7	5009.8	0.302292	3.30806
1	JL033021_040221_RPA2HFH_Q2_10to1_100B.27484.27484.3	1.93e-07	R.LM[147.04]NAFVTIQNDVNAFIDSTK[425.27]AQGR.T	YOR341W	2965.5	126.127	14294.1	127.13	4645.87	15463.2	3695.2	0.238967	4.18468
0.9983	JL033021_040221_RPA2HFH_Q2_10to1_100B.33432.33432.4	0.022	R.SLADDYDYVM[147.04]YGTAYK[425.27]FEEVSK[425.27]DLIAVYYSFGGLLM[147.04]R.L	YOR224C	4918.38	126.127	7419.46	127.13	5471.99	8001.08	5197.62	0.649615	1.53937
0.9542	JL033021_040221_RPA2HFH_Q2_10to1_1ug.02804.02804.3	0.206	R.GQHTK[425.27]TTGR.R	YDR450W,YML026C	1281.69	126.127	42892.3	127.13	6990.41	46457.8	3640.23	0.0783556	12.7623
1	JL033021_040221_RPA2HFH_Q2_10to1_1ug.02962.02962.4	5.48e-11	R.LVK[425.27]ALEDIM[147.04]VHYDNTTR.N	RPB1-msCTD,YDL140C	2330.2	126.127	7507.25	127.13	8454.96	8071.7	8386.23	1.03897	0.962494
1	JL033021_040221_RPA2HFH_Q2_10to1_1ug.03127.03127.3	0.0159	R.K[425.27]HSSVNTER.F	YDR183W	1353.71	126.127	32118.3	127.13	5704.52	34784.3	3229.51	0.0928437	10.7708
1	JL033021_040221_RPA2HFH_Q2_10to1_1ug.03209.03209.3	0.00227	K.ASM[147.04]M[147.04]GHK[425.27]VR.V	YOR341W	1344.67	126.127	57523.2	127.13	11697.7	62285.7	7371.07	0.118343	8.45002
0.9997	JL033021_040221_RPA2HFH_Q2_10to1_1ug.03250.03250.3	0.0755	R.GM[147.04]VSHK[425.27]TAR.G	YIL133C,YNL069C	1298.68	126.127	88261.4	127.13	16215.6	95583.2	9452.87	0.0988968	10.1116
1	JL033021_040221_RPA2HFH_Q2_10to1_1ug.03294.03294.3	0.00174	R.NSQK[425.27]PNNSQSR.T	YBL005W-A,YBL005W-B,YDR170W-A,YMR045C,YMR046C,YNL284C-A,YNL284C-B	1555.78	126.127	24285.4	127.131	3706.98	26306.2	1792.16	0.0681269	14.6785
1	JL033021_040221_RPA2HFH_Q2_10to1_1ug.03308.03308.3	1.17e-05	R.K[425.27]DAQSQEM[147.04]SQR.L	YLR409C	1619.77	126.127	10223.2	127.13	2000.8	11070.2	1226.26	0.110771	9.02765
1	JL033021_040221_RPA2HFH_Q2_10to1_1ug.03312.03312.3	0.00616	R.DM[147.04]K[425.27]EQQQR.A	YGL244W	1374.66	126.127	69100	127.13	14022.2	74821.3	8822.63	0.117916	8.48061
1	JL033021_040221_RPA2HFH_Q2_10to1_1ug.03317.03317.3	1.23e-11	R.AAM[147.04]NDK[425.27]DLTM[147.04]GQVGER.L	RPB1-msCTD,YDL140C	2063.97	126.127	23973.2	127.131	29103.7	25758.3	29034.8	1.1272	0.887152
1	JL033021_040221_RPA2HFH_Q2_10to1_1ug.03320.03320.3	2.32e-06	R.GK[425.27]NEIIQNAQR.D	RPB1-msCTD,YDL140C	1566.86	126.127	23798.9	127.13	23527.2	25615.2	23074.8	0.900826	1.11009
0.9976	JL033021_040221_RPA2HFH_Q2_10to1_1ug.03331.03331.3	0.0145	R.NSQK[425.27]PNNSQSR.T	YBL005W-A,YBL005W-B,YDR170W-A,YMR045C,YMR046C,YNL284C-A,YNL284C-B	1555.78	126.127	36902.4	127.131	6845.71	39963.1	4022.9	0.100665	9.93391
1	JL033021_040221_RPA2HFH_Q2_10to1_1ug.03691.03691.3	0.000945	R.VK[425.27]NKQPYR.E	YDR346C	1328.76	126.127	162196	127.13	26419.5	175679	13749.9	0.0782673	12.7767
1	JL033021_040221_RPA2HFH_Q2_10to1_1ug.03842.03842.3	0.00012	R.DK[425.27]M[147.04]SEQEAR.R	YDR477W	1405.66	126.127	55357.9	127.13	10787.8	59945.1	6590.34	0.10994	9.0959
0.9736	JL033021_040221_RPA2HFH_Q2_10to1_1ug.03949.03949.4	4.47e-06	K.RLEEDNDEEQSHK[425.27]K.T	YOR341W	2052.98	126.127	28763.5	127.13	4258.39	31158	1981.03	0.0635803	15.7281
1	JL033021_040221_RPA2HFH_Q2_10to1_1ug.03991.03991.3	2.26e-06	K.RLEEDNDEEQSHK[425.27]K.T	YOR341W	2052.98	126.126	17565.8	127.129	2592.64	19028.2	1201.3	0.0631323	15.8397
0.9724	JL033021_040221_RPA2HFH_Q2_10to1_1ug.04152.04152.4	2.41	K.RLEEDNDEEQSHK[425.27]K.T	YOR341W	2052.98	126.127	28301.3	127.13	3646.78	30661.9	1367.13	0.0445874	22.4279
0.9988	JL033021_040221_RPA2HFH_Q2_10to1_1ug.04188.04188.3	0.505	R.VSTQHEK[425.27]ET.-	YGL008C	1354.68	126.127	75640.8	127.13	12915.2	81923.7	7049.26	0.0860467	11.6216
0.9671	JL033021_040221_RPA2HFH_Q2_10to1_1ug.04203.04203.4	0.00116	R.LEEDNDEEQSHK[425.27]K.T	YOR341W	1896.88	126.127	111557	127.131	13764	120867	4734.41	0.0391704	25.5295
1	JL033021_040221_RPA2HFH_Q2_10to1_1ug.04239.04239.3	0.00146	R.AK[425.27]NNDQSLSK.K	YGL244W	1400.73	126.127	86625	127.13	15988.8	93810.3	9356.78	0.0997415	10.0259
0.9963	JL033021_040221_RPA2HFH_Q2_10to1_1ug.04312.04312.4	0.626	R.VK[425.27]NEDREVQER.L	YML069W	1697.88	126.127	106520	127.13	19988.2	115353	11856.4	0.102784	9.72913
0.998	JL033021_040221_RPA2HFH_Q2_10to1_1ug.04477.04477.3	0.286	R.K[425.27]LQDEAQK.L	YOL145C	1255.69	126.127	149742	127.13	25204	162183	13565.4	0.0836428	11.9556
0.9993	JL033021_040221_RPA2HFH_Q2_10to1_1ug.04621.04621.3	0.0383	R.C[160.03]VHPEPENGK[425.27]R.V	YOR341W	1618.8	126.127	86613.4	127.13	15842.3	93799	9200.79	0.0980906	10.1947
1	JL033021_040221_RPA2HFH_Q2_10to1_1ug.04625.04625.4	0.0724	R.C[160.03]VHPEPENGK[425.27]R.V	YOR341W	1618.8	126.127	394384	127.13	72829.6	427097	42638	0.0998321	10.0168
0.9999	JL033021_040221_RPA2HFH_Q2_10to1_1ug.04660.04660.3	0.00112	R.VVTK[425.27]AM[147.04]SSR.-	YDL229W,YNL209W	1290.7	126.127	379778	127.13	65044.1	411322	35606.3	0.0865657	11.5519
1	JL033021_040221_RPA2HFH_Q2_10to1_1ug.04718.04718.4	0.0182	K.AK[425.27]YC[160.03]DSM[147.04]GRPQR.K	YBR154C	1780.84	126.127	146026	127.13	22264.2	158178	10748.7	0.0679531	14.716
0.9883	JL033021_040221_RPA2HFH_Q2_10to1_1ug.04733.04733.3	0.199	K.AK[425.27]YC[160.03]DSM[147.04]GRPQR.K	YBR154C	1780.84	126.127	45449.6	127.13	5983.79	49239.4	2331.98	0.04736	21.1149
0.9877	JL033021_040221_RPA2HFH_Q2_10to1_1ug.04774.04774.3	0.517	K.AK[425.27]YC[160.03]DSM[147.04]GRPQR.K	YBR154C	1780.84	126.127	62464.7	127.13	8741.41	67669	3759.51	0.0555573	17.9994
0.9999	JL033021_040221_RPA2HFH_Q2_10to1_1ug.04971.04971.4	1.36e-06	E.GGQEDFESSGAGK[425.27]IGLGGRGGSGGSYGRGSRGGSGGSYGGGGSGGGYGGGSGSR.G	K1CI_HUMAN	4969.24					0	0	#DIV/0!	#DIV/0!
0.9552	JL033021_040221_RPA2HFH_Q2_10to1_1ug.05123.05123.3	3.7e-05	R.NPDAPK[425.27]GSTDPK.E	YPR110C	1522.77	126.127	598126	127.131	98183.4	647840	51516.1	0.0795197	12.5755
0.951	JL033021_040221_RPA2HFH_Q2_10to1_1ug.05173.05173.3	0.0842	K.FKEEDEK[425.27]ESQR.L	YAL005C,YLL024C	1720.83	126.127	76741.9	127.13	11910.7	83126.1	5873.91	0.0706627	14.1517
1	JL033021_040221_RPA2HFH_Q2_10to1_1ug.05181.05181.4	0.000251	K.FKEEDEK[425.27]ESQR.L	YAL005C,YLL024C	1720.83	126.127	129311	127.13	18834.3	140078	8573.93	0.061208	16.3377
1	JL033021_040221_RPA2HFH_Q2_10to1_1ug.05207.05207.3	0.000961	H.K[425.27]LNM[147.04]AM[147.04]ADAR.R	YDR502C,YLR180W	1448.72	126.127	115719	127.13	18884.7	125338	9848.1	0.0785722	12.7272
1	JL033021_040221_RPA2HFH_Q2_10to1_1ug.05210.05210.4	0.00191	R.AGHSATGGM[147.04]K[425.27]LGGGAGR.R	YFR051C	1796.9	126.127	151953	127.13	28086.5	164557	16455.7	0.0999998	10
1	JL033021_040221_RPA2HFH_Q2_10to1_1ug.05258.05258.3	0.00709	K.LSAK[425.27]GQQEAAR.A	YKL152C	1454.79	126.127	160434	127.13	28344.1	173752	15970.5	0.0919154	10.8796
1	JL033021_040221_RPA2HFH_Q2_10to1_1ug.05265.05265.4	0.00172	R.LRQQQQQQDQPEQSEQPEQHQDK[425.27].-	YHR200W	3156.49	126.126	5644.82			6121.64	-506.752	-0.0827804	-12.0802
0.9595	JL033021_040221_RPA2HFH_Q2_10to1_1ug.05339.05339.3	1.11	K.K[425.27]MSNSSPNNSTR.S	DECOY_YFR022W_UNMAPPED	1618.78	126.127	47564.6	127.13	9086.29	51507.4	5466.7	0.106134	9.42203
1	JL033021_040221_RPA2HFH_Q2_10to1_1ug.05375.05375.3	0.002	R.LEEDNDEEQSHK[407.26]KTK.Q	YOR341W	2108.01	126.127	27752.2	127.13	4089.07	30062.7	1890.38	0.0628812	15.903
1	JL033021_040221_RPA2HFH_Q2_10to1_1ug.05380.05380.3	0.00106	R.DGIHDTNK[425.27]QAQAENSR.Q	YPL232W	2080	126.127	26432.7	127.13	4265.33	28630.3	2197.71	0.0767616	13.0274
1	JL033021_040221_RPA2HFH_Q2_10to1_1ug.05388.05388.3	0.00018	R.DGIHDTNK[425.27]QAQAENSR.Q	YPL232W	2080	126.126	29655.9	127.13	6621.08	32106.3	4432.73	0.138064	7.243
1	JL033021_040221_RPA2HFH_Q2_10to1_1ug.05417.05417.4	8.67e-09	R.DGIHDTNK[425.27]QAQAENSR.Q	YPL232W	2080	126.127	65513.3	127.131	10348	70961.9	5207.4	0.0733831	13.6271
1	JL033021_040221_RPA2HFH_Q2_10to1_1ug.05436.05436.3	8.47e-06	R.K[425.27]QNSPTTYGASR.R	YOR123C	1605.82	126.127	108751	127.131	19658.4	117775	11302.7	0.0959685	10.4201
1	JL033021_040221_RPA2HFH_Q2_10to1_1ug.05483.05483.3	3.23e-05	R.QQQQQQDQPEQSEQPEQHQDK[425.27].-	YHR200W	2887.3	126.127	6563.16			7117.54	-589.193	-0.0827804	-12.0802
1	JL033021_040221_RPA2HFH_Q2_10to1_1ug.05631.05631.4	0.000336	R.M[147.04]SVYEK[425.27]HHENDQSDIK.K	YGL244W	2272.05	126.127	54548	127.13	9360.89	59078.5	5134.02	0.0869017	11.5073
0.9903	JL033021_040221_RPA2HFH_Q2_10to1_1ug.05663.05663.3	0.0119	R.K[407.26]QNSPTTYGASR.R	YOR123C	1587.81	126.127	59077.1	127.13	10251.6	63982.8	5681.92	0.0888039	11.2608
0.9782	JL033021_040221_RPA2HFH_Q2_10to1_1ug.05779.05779.3	0.98	R.K[407.26]VYPSESR.Q	YPR010C	1243.66	126.127	353392	127.131	64741.2	382709	37650.6	0.0983791	10.1648
1	JL033021_040221_RPA2HFH_Q2_10to1_1ug.05823.05823.3	0.00566	R.TSPNTTNTK[425.27]VTTR.N	YBL100W-A,YBL100W-B,YCL019W,YCL020W,YDR034C-C,YDR034C-D,YDR210W-A,YDR210W-B,YFL002W-A,YFL002W-B,YGR161W-A,YGR161W-B,YLR410W-A,YLR410W-B,YOR192C-A,YOR192C-B,YOR343W-A,YOR343W-B	1716.91	126.127	74668.8	127.13	12838.3	80870.2	7054.07	0.0872271	11.4643
0.9821	JL033021_040221_RPA2HFH_Q2_10to1_1ug.05829.05829.3	0.0029	K.LVHEFHKK[425.27].L	YOR341W	1333.76	126.127	222073	127.13	37567.9	240522	20321	0.084487	11.8361
1	JL033021_040221_RPA2HFH_Q2_10to1_1ug.05844.05844.3	0.00189	R.LQTDVANSSSNSK[425.27]R.L	YOR341W	1802.92	126.127	102775	127.131	21475.9	111279	13786.8	0.123894	8.07141
1	JL033021_040221_RPA2HFH_Q2_10to1_1ug.05858.05858.3	0.000238	R.K[425.27]VYPSESR.Q	YPR010C	1261.67	126.127	473882	127.13	81775.5	513237	45087.3	0.087849	11.3832
1	JL033021_040221_RPA2HFH_Q2_10to1_1ug.05859.05859.3	0.000363	R.LQTDVANSSSNSK[425.27]R.L	YOR341W	1802.92	126.127	94628	127.13	17961.2	102473	10751.9	0.104924	9.53074
1	JL033021_040221_RPA2HFH_Q2_10to1_1ug.05937.05937.3	0.000266	R.TGQIK[425.27]TGAPAR.S	YGR254W,YHR174W	1395.79	126.127	234672	127.13	41910.1	254150	23842.9	0.0938145	10.6593
1	JL033021_040221_RPA2HFH_Q2_10to1_1ug.05945.05945.3	0.00192	R.LQTDVANSSSNSK[425.27]R.L	YOR341W	1802.92	126.127	81886.2	127.131	18011.8	88654.6	11950	0.134793	7.41881
0.9978	JL033021_040221_RPA2HFH_Q2_10to1_1ug.06040.06040.3	0.000157	R.K[425.27]VYPSESR.Q	YPR010C	1261.67	126.127	338375	127.13	66817.2	366407	41223.2	0.112507	8.88835
0.9999	JL033021_040221_RPA2HFH_Q2_10to1_1ug.06048.06048.4	0.0357	Q.AFSVAEFIK[407.26]VNDVVNM[147.04]IR.V	YGL013C	2346.25	126.127	114497	127.13	24648.4	123965	16134.1	0.13015	7.68343
1	JL033021_040221_RPA2HFH_Q2_10to1_1ug.06049.06049.3	0.000267	R.LQTDVANSSSNSK[425.27]R.L	YOR341W	1802.92	126.127	105410	127.13	21772.1	114135	13867.6	0.121502	8.23035
1	JL033021_040221_RPA2HFH_Q2_10to1_1ug.06156.06156.3	0.000191	R.K[425.27]VYPSESR.Q	YPR010C	1261.67	126.127	274998	127.13	52190.8	297797	31239.3	0.104901	9.53276
0.9995	JL033021_040221_RPA2HFH_Q2_10to1_1ug.06162.06162.3	0.269	K.K[425.27]RYPHLQNR.T	YPR010C	1507.85	126.127	128930	127.13	25760.2	139608	16029.8	0.11482	8.70931
0.9882	JL033021_040221_RPA2HFH_Q2_10to1_1ug.06170.06170.5	0.00508	R.NSLGNVIQFIYGEDGM[147.04]DAAHIEK[425.27]QSLDTIGGSDAAFEK[425.27]R.Y	RPB1-msCTD,YDL140C	4806.36	126.127	9668.86	127.13	10872.5	10396	10782.7	1.0372	0.964131
0.9733	JL033021_040221_RPA2HFH_Q2_10to1_1ug.06182.06182.3	0.0703	F.FKPDSYIGAK[407.26].N	DECOY_YDR365C_UNMAPPED	1403.75	126.127	256903	127.13	36034.2	278307	15550.7	0.0558762	17.8967
1	JL033021_040221_RPA2HFH_Q2_10to1_1ug.06195.06195.3	2.22e-06	R.K[425.27]TDEPVADAER.S	YNL124W	1526.77	126.127	134083	127.13	25934.3	145195	15753.7	0.1085	9.2166
0.9625	JL033021_040221_RPA2HFH_Q2_10to1_1ug.06209.06209.3	0.441	K.K[425.27]IATYQER.D	YGR192C,YJL052W	1304.72	126.127	212863	127.13	33397.4	230568	16678.7	0.0723374	13.8241
1	JL033021_040221_RPA2HFH_Q2_10to1_1ug.06210.06210.3	0.00099	R.K[425.27]VYPSESR.Q	YPR010C	1261.67	126.127	286048	127.13	45506.8	309835	23085	0.0745073	13.4215
1	JL033021_040221_RPA2HFH_Q2_10to1_1ug.06213.06213.3	2.35e-06	R.LQTDVANSSSNSK[425.27]R.L	YOR341W	1802.92	126.128	607332	127.131	124443	657607	78828.7	0.119872	8.34223
0.995	JL033021_040221_RPA2HFH_Q2_10to1_1ug.06233.06233.3	0.457	R.K[425.27]VYPSESR.Q	YPR010C	1261.67	126.127	282981	127.13	44946.9	306514	22760.3	0.0742554	13.467
1	JL033021_040221_RPA2HFH_Q2_10to1_1ug.06238.06238.3	0.00098	R.NPSTK[425.27]EANIR.D	YBR279W	1425.77	126.127	171840	127.13	28123.6	186123	14710.2	0.0790347	12.6527
1	JL033021_040221_RPA2HFH_Q2_10to1_1ug.06249.06249.3	0.00157	R.LQTDVANSSSNSK[425.27]R.L	YOR341W	1802.92	126.128	596428	127.131	115166	645859	69866.9	0.108177	9.24412
1	JL033021_040221_RPA2HFH_Q2_10to1_1ug.06255.06255.4	0.0183	R.VK[425.27]NK[425.27]QPYR.E	YDR346C	1625.94	126.127	329114	127.13	63889.9	356387	38917.8	0.109201	9.15742
1	JL033021_040221_RPA2HFH_Q2_10to1_1ug.06268.06268.4	0.0163	R.VK[425.27]NK[425.27]QPYR.E	YDR346C	1625.94	126.127	273545	127.13	54942	296198	34317.9	0.115861	8.63101
0.9923	JL033021_040221_RPA2HFH_Q2_10to1_1ug.06372.06372.3	0.0572	R.LQTDVM[147.04]LTEGK[425.27]PDSV.T	YPL181W	1944.98	126.127	163352	127.131	19117.8	176992	5821.74	0.0328926	30.4019
1	JL033021_040221_RPA2HFH_Q2_10to1_1ug.06428.06428.3	0.000117	R.LQTDVANSSSNSK[425.27]R.L	YOR341W	1802.92	126.127	246265	127.13	52449.4	266634	34095.9	0.127875	7.82013
0.9893	JL033021_040221_RPA2HFH_Q2_10to1_1ug.06447.06447.3	0.000469	K.K[425.27]DVDGAYM[147.04]TK.V	K2C1_HUMAN	1439.7	126.127	137255	127.13	20340.3	148682	9474.46	0.0637231	15.6929
0.9909	JL033021_040221_RPA2HFH_Q2_10to1_1ug.06461.06461.6	0.0118	R.GVAM[147.04]NPVDHPHGGGNHQHIGK[425.27]ASTISR.G	YFR031C-A,YIL018W	3086.53	126.128	90997.2	127.131	16977	98543.8	10023.2	0.101713	9.8316
1	JL033021_040221_RPA2HFH_Q2_10to1_1ug.06462.06462.5	0.00319	R.GVAM[147.04]NPVDHPHGGGNHQHIGK[425.27]ASTISR.G	YFR031C-A,YIL018W	3086.53	126.127	53773.9	127.13	9218.48	58240.1	5050.92	0.0867258	11.5306
1	JL033021_040221_RPA2HFH_Q2_10to1_1ug.06482.06482.3	3.59e-08	R.GM[147.04]ATNSENSGSGEK[425.27]YEPR.L	YCL034W	2225.99	126.127	50110.1	127.13	8527.07	54272.6	4638.92	0.0854744	11.6994
1	JL033021_040221_RPA2HFH_Q2_10to1_1ug.06488.06488.3	0.000571	R.LQTDVANSSSNSK[407.26]R.L	YOR341W	1784.91	126.127	88367.1	127.13	14635.2	95710.8	7749.88	0.0809719	12.35
0.9939	JL033021_040221_RPA2HFH_Q2_10to1_1ug.06497.06497.4	0.0193	R.GVAM[147.04]NPVDHPHGGGNHQHIGK[425.27]ASTISR.G	YFR031C-A,YIL018W	3086.53	126.127	11044.8	127.131	2157.93	11959.9	1320.87	0.110442	9.05455
1	JL033021_040221_RPA2HFH_Q2_10to1_1ug.06542.06542.3	0.0033	R.GGAEDAQK[425.27]EQIR.K	YGL207W	1597.81	126.127	108707	127.13	19473.2	117728	11108.2	0.0943549	10.5983
1	JL033021_040221_RPA2HFH_Q2_10to1_1ug.06557.06557.3	0.000699	R.GGAEDAQK[425.27]EQIR.K	YGL207W	1597.81	126.127	116876	127.13	20780.8	126577	11776.1	0.0930347	10.7487
1	JL033021_040221_RPA2HFH_Q2_10to1_1ug.06605.06605.3	0.00788	R.K[425.27]PPLSDAQR.R	YPL190C	1307.73	126.127	154800	127.13	28808.9	167639	16974.2	0.101255	9.87607
1	JL033021_040221_RPA2HFH_Q2_10to1_1ug.06608.06608.3	5.39e-05	R.LK[425.27]SVEVHR.Y	YOR341W	1263.74	126.127	403994	127.13	66505.3	437571	34998.2	0.079983	12.5027
1	JL033021_040221_RPA2HFH_Q2_10to1_1ug.06754.06754.3	0.0238	R.LQTDVANSSSNSK[407.26]R.L	YOR341W	1784.91	126.127	73823.3	127.13	13917.1	79944.4	8286.02	0.103647	9.64812
0.9522	JL033021_040221_RPA2HFH_Q2_10to1_1ug.06759.06759.3	8.77e-05	R.RFDDESVQK[425.27]DM[147.04]K.T	YDL229W,YNL209W	1809.86	126.126	106372	127.13	22001	115176	14026.6	0.121784	8.21124
1	JL033021_040221_RPA2HFH_Q2_10to1_1ug.06775.06775.3	0.031	R.LK[425.27]SVEVHR.Y	YOR341W	1263.74	126.127	247658	127.13	42544.3	268227	23356.8	0.0870785	11.4839
1	JL033021_040221_RPA2HFH_Q2_10to1_1ug.06808.06808.3	0.0221	K.K[425.27]TATEVTPQEPK.H	YNL113W	1624.88	126.126	111681	127.13	18595.6	120962	9900.73	0.0818501	12.2175
0.9585	JL033021_040221_RPA2HFH_Q2_10to1_1ug.06834.06834.4	0.0689	Q.QSLLLSQRESLVESSK[407.26].Q	DECOY_YAL041W_UNMAPPED	2082.14	126.127	182458	127.13	33753.9	197591	19790.3	0.100158	9.98426
1	JL033021_040221_RPA2HFH_Q2_10to1_1ug.06862.06862.3	0.00719	R.LQTDVANSSSNSK[407.26]R.L	YOR341W	1784.91	126.127	105805	127.13	19250.6	114584	11130.1	0.097135	10.295
0.9868	JL033021_040221_RPA2HFH_Q2_10to1_1ug.06899.06899.3	1.04	K.NELKDGATIK[425.27]EK.C	YJR063W	1641.9	126.127	89668.7	127.13	14053.9	97127.2	7010.13	0.0721748	13.8553
0.9816	JL033021_040221_RPA2HFH_Q2_10to1_1ug.06917.06917.3	0.151	R.SQIM[147.04]QK[425.27]YQER.K	YGL244W	1622.82	126.127	124781	127.131	24096	135122	14618.9	0.10819	9.24299
0.9741	JL033021_040221_RPA2HFH_Q2_10to1_1ug.07053.07053.3	0.196	R.TASLIK[407.26]EC[160.03]R.Y	YLR108C	1355.73	126.127	255667	127.13	40539.2	276929	20489.2	0.0739872	13.5159
1	JL033021_040221_RPA2HFH_Q2_10to1_1ug.07057.07057.3	0.00103	R.TASK[425.27]DLPTR.A	YNL248C	1284.71	126.127	274053	127.13	53292.1	296763	32504.2	0.109529	9.12998
1	JL033021_040221_RPA2HFH_Q2_10to1_1ug.07065.07065.3	0.00383	K.LLTK[425.27]SEDGEK.L	YPR010C	1415.76	126.127	196072	127.13	32489.7	212366	17213.4	0.0810552	12.3373
1	JL033021_040221_RPA2HFH_Q2_10to1_1ug.07069.07069.3	0.00212	R.TASK[425.27]DLPTR.A	YNL248C	1284.71	126.127	340138	127.13	62884.3	368351	36850.5	0.100042	9.99582
0.9598	JL033021_040221_RPA2HFH_Q2_10to1_1ug.07074.07074.3	0.118	K.SIVEANNNM[147.04]NK[425.27]VQR.D	YOR341W	1928.98	126.127	165005	127.131	29153.9	178702	16427.9	0.0919289	10.878
1	JL033021_040221_RPA2HFH_Q2_10to1_1ug.07085.07085.3	0.00208	K.LLTK[425.27]SEDGEK.L	YPR010C	1415.76	126.127	206226	127.13	33390.3	223371	17266.9	0.0773014	12.9364
0.9998	JL033021_040221_RPA2HFH_Q2_10to1_1ug.07092.07092.3	0.0469	R.SQIM[147.04]QK[425.27]YQER.K	YGL244W	1622.82	126.127	158428	127.13	29511.3	171567	17401.3	0.101425	9.85947
1	JL033021_040221_RPA2HFH_Q2_10to1_1ug.07115.07115.3	0.000251	R.EGK[425.27]TDYYQR.K	YPL131W	1455.71	126.127	188768	127.13	31970.3	204450	17312.6	0.0846789	11.8093
1	JL033021_040221_RPA2HFH_Q2_10to1_1ug.07121.07121.3	9.9e-09	R.SM[147.04]AK[425.27]TGATVGSEPVR.L	YFL023W	1802.93	126.127	70710.6	127.13	12737.1	76578.5	7300.94	0.0953393	10.4889
1	JL033021_040221_RPA2HFH_Q2_10to1_1ug.07129.07129.3	0.0462	R.DNINK[425.27]VAER.G	YAL030W,YOR327C	1354.73	126.127	172872	127.13	28037.6	187244	14525.3	0.0775742	12.8909
0.985	JL033021_040221_RPA2HFH_Q2_10to1_1ug.07134.07134.3	0.0477	R.K[425.27]GDHFVVR.G	YDL126C	1253.7	126.127	176190	127.13	29647.8	190829	15952.9	0.0835982	11.962
0.9963	JL033021_040221_RPA2HFH_Q2_10to1_1ug.07145.07145.3	0.117	R.GQK[425.27]LASNIK.L	YGL009C	1254.74	126.127	216333	127.13	36941.1	234302	20164.6	0.0860622	11.6195
1	JL033021_040221_RPA2HFH_Q2_10to1_1ug.07174.07174.4	0.0152	D.GDYK[425.27]DHDIDYKDDDDK.-	RPB1-msCTD	2252.98	126.127	73952	127.13	11981.3	80099.9	6200.07	0.0774042	12.9192
0.9987	JL033021_040221_RPA2HFH_Q2_10to1_1ug.07238.07238.3	0.0427	R.TASK[425.27]DLPTR.A	YNL248C	1284.71	126.127	229027	127.13	43094.6	248017	25618.9	0.103295	9.68102
1	JL033021_040221_RPA2HFH_Q2_10to1_1ug.07240.07240.3	5.27e-05	K.SIVEANNNM[147.04]NK[425.27]VQR.D	YOR341W	1928.98	126.128	156692	127.131	27755.7	169699	15675.8	0.0923738	10.8256
0.9926	JL033021_040221_RPA2HFH_Q2_10to1_1ug.07262.07262.3	0.252	R.SLDVVSPGSLAEFEGSK[407.26].S	YML007W	2000.02	126.127	230236	127.131	29168.9	249444	10588	0.0424463	23.5592
0.9678	JL033021_040221_RPA2HFH_Q2_10to1_1ug.07360.07360.3	0.0627	K.SIVEANNNM[147.04]NK[425.27]VQR.D	YOR341W	1928.98	126.127	68351.7	127.131	12193.3	74024.8	6930.03	0.0936177	10.6817
1	JL033021_040221_RPA2HFH_Q2_10to1_1ug.07368.07368.3	7.13e-07	R.TK[425.27]TPGPGGQAALR.A	YCR031C,YJL191W	1549.87	126.127	142063	127.13	27034.6	153840	16216.4	0.105411	9.48665
0.9757	JL033021_040221_RPA2HFH_Q2_10to1_1ug.07386.07386.4	0.0598	R.AAWLSK[425.27]K[425.27]VDAM[147.04]GVESTGIQR.L	YGL186C	2756.47	126.127	29465.3	127.13	4653.87	31915.8	2341.81	0.0733747	13.6287
1	JL033021_040221_RPA2HFH_Q2_10to1_1ug.07387.07387.3	9.79e-13	K.IVEQK[425.27]NSSPAYDEDGNDDR.L	YPL260W	2448.11	126.127	22427	127.13	3705.2	24290.8	1957.09	0.080569	12.4117
0.9994	JL033021_040221_RPA2HFH_Q2_10to1_1ug.07530.07530.3	0.00398	K.SIVEANNNM[147.04]NK[425.27]VQR.D	YOR341W	1928.98	126.127	187166	127.131	27847.1	202746	13038	0.064307	15.5504
1	JL033021_040221_RPA2HFH_Q2_10to1_1ug.07568.07568.4	0.00427	R.GEAYISHDGGQTIK[425.27]R.F	YBL017C	1927.98	126.127	146557	127.13	25847.4	158724	14540.7	0.0916105	10.9158
0.9915	JL033021_040221_RPA2HFH_Q2_10to1_1ug.07610.07610.3	0.000987	K.AADEAFAK[425.27]K.H	YDL229W,YNL209W	1246.66	126.127	171121	127.13	28017.1	185345	14660.6	0.0790992	12.6424
1	JL033021_040221_RPA2HFH_Q2_10to1_1ug.07688.07688.3	0.0101	R.LK[425.27]ESQLPR.L	YBR154C	1266.74	126.127	250753	127.13	47947.4	271539	28868.8	0.106315	9.40597
0.9996	JL033021_040221_RPA2HFH_Q2_10to1_1ug.07750.07750.3	6.71e-05	K.IQDK[425.27]EGIPPDQQR.L	YIL148W,YKR094C,YLL039C,YLR167W	1819.95	126.127	67740.3	127.13	11061.7	73371.1	5772.26	0.0786721	12.711
0.9671	JL033021_040221_RPA2HFH_Q2_10to1_1ug.07760.07760.3	0.000109	K.AADEAFAK[407.26]KHEAR.Q	YDL229W,YNL209W	1721.89	126.126	144476	127.13	23685.4	156484	12410.8	0.0793103	12.6087
1	JL033021_040221_RPA2HFH_Q2_10to1_1ug.07785.07785.3	3.79e-06	R.LM[147.04]K[425.27]SAIGEGM[147.04]TR.K	YBR127C	1621.82	126.127	124154	127.13	20561.8	134472	10887.9	0.0809679	12.3506
0.974	JL033021_040221_RPA2HFH_Q2_10to1_1ug.07813.07813.5	0.00281	R.STGPVNSLTM[147.04]QPVK[425.27]GRKR.H	YPR010C	2268.25	126.127	203782	127.13	39570.3	220669	24108.8	0.109253	9.15308
1	JL033021_040221_RPA2HFH_Q2_10to1_1ug.07850.07850.3	0.0209	R.LK[425.27]ESQLPR.L	YBR154C	1266.74	126.127	267372	127.13	49685.3	289547	29239.1	0.100982	9.90274
0.9951	JL033021_040221_RPA2HFH_Q2_10to1_1ug.07857.07857.3	0.0638	K.NVTDPIK[425.27]K.S	YGL009C	1210.7	126.127	275028	127.13	44051	297897	22514.2	0.0755771	13.2315
1	JL033021_040221_RPA2HFH_Q2_10to1_1ug.07869.07869.3	0.000895	K.IQDK[425.27]EGIPPDQQR.L	YIL148W,YKR094C,YLL039C,YLR167W	1819.95	126.127	89261.3	127.13	16825.2	96662.5	10016.3	0.103621	9.65053
0.9849	JL033021_040221_RPA2HFH_Q2_10to1_1ug.07892.07892.3	0.265	R.GM[147.04]AINFK[425.27]DKR.Y	YPR010C	1491.79	126.127	258180	127.13	42473.2	279638	22336	0.0798745	12.5196
1	JL033021_040221_RPA2HFH_Q2_10to1_1ug.07910.07910.3	4.13e-07	K.YGSEK[425.27]GSPAGPSAVTAR.L	YDR429C	1930.98	126.127	122191	127.131	22891	132324	13560.2	0.102477	9.75828
1	JL033021_040221_RPA2HFH_Q2_10to1_1ug.07921.07921.3	1.2e-07	K.YGSEK[425.27]GSPAGPSAVTAR.L	YDR429C	1930.98	126.128	123957	127.131	20510.3	134258	10850.5	0.0808185	12.3734
0.9633	JL033021_040221_RPA2HFH_Q2_10to1_1ug.07968.07968.3	0.00909	R.LK[425.27]ESQLPR.L	YBR154C	1266.74	126.127	155791	127.131	27648.8	168722	15642.1	0.0927092	10.7864
1	JL033021_040221_RPA2HFH_Q2_10to1_1ug.07986.07986.3	6.65e-06	R.TK[425.27]GEVNENSAPDLQR.R	YJR072C	1953.98	126.126	98782.6	127.13	17424.8	106983	9804.13	0.0916419	10.912
0.9604	JL033021_040221_RPA2HFH_Q2_10to1_1ug.08013.08013.5	0.000219	R.DYK[407.26]DHDGDYK[407.26]DHDIDYKDDDDK.-	RPB1-msCTD	3287.43	126.127	83734.5	127.13	13595.1	90695.5	7051.18	0.0777456	12.8625
1	JL033021_040221_RPA2HFH_Q2_10to1_1ug.08071.08071.3	2.48e-07	K.IQDK[425.27]EGIPPDQQR.L	YIL148W,YKR094C,YLL039C,YLR167W	1819.95	126.127	104329	127.131	19817.2	112978	11869.9	0.105063	9.51809
0.9997	JL033021_040221_RPA2HFH_Q2_10to1_1ug.08104.08104.5	0.000159	K.RLEEDNDEEQSHKK[425.27]TKQAVSYDEPDEDEIETM[147.04]R.E	YOR341W	4305.95	126.127	15125.6	127.13	2114.98	16385.8	908.513	0.0554453	18.0358
1	JL033021_040221_RPA2HFH_Q2_10to1_1ug.08116.08116.3	1.42e-07	R.AAM[147.04]NDK[425.27]DLTM[147.04]GQVGER.L	RPB1-msCTD,YDL140C	2063.97	126.127	73354.5	127.131	13469.2	79439.7	7848.16	0.0987939	10.1221
1	JL033021_040221_RPA2HFH_Q2_10to1_1ug.08127.08127.4	2.8e-09	R.SAHHIHSASSNPDINVVDAQK[425.27]R.N	YBL005W-B,YBR012W-B,YDR210C-D,YDR261C-D,YDR316W-B,YDR365W-B,YER138C,YER160C,YGR027W-B,YGR161C-D,YHR214C-B,YJR027W,YJR029W,YLR157C-B,YLR227W-B,YML039W,YML045W,YMR045C,YMR050C,YNL054W-B,YOL103W-B,YOR142W-B,YPL257W-B,YPR137C-B,YPR158C-D,YPR158W-B	2679.36	126.127	58826.6	127.13	10208.5	63711.5	5658.17	0.0888092	11.2601
1	JL033021_040221_RPA2HFH_Q2_10to1_1ug.08142.08142.3	8.54e-06	K.IQDK[425.27]EGIPPDQQR.L	YIL148W,YKR094C,YLL039C,YLR167W	1819.95	126.127	102632	127.131	18193.5	111151	10282.3	0.0925077	10.8099
0.9993	JL033021_040221_RPA2HFH_Q2_10to1_1ug.08148.08148.3	0.183	R.ATTPYM[147.04]TK[425.27]YER.A	YPR187W	1672.82	126.127	342775	127.131	58321.4	371248	31724.2	0.085453	11.7023
0.973	JL033021_040221_RPA2HFH_Q2_10to1_1ug.08167.08167.3	0.0873	K.NELK[425.27]DGATIK.E	YJR063W	1384.76	126.127	178760	127.13	32171.5	193595	18426.5	0.0951809	10.5063
1	JL033021_040221_RPA2HFH_Q2_10to1_1ug.08183.08183.5	5.8e-07	R.SAHHIHSASSNPDINVVDAQK[425.27]R.N	YBL005W-B,YBR012W-B,YDR210C-D,YDR261C-D,YDR316W-B,YDR365W-B,YER138C,YER160C,YGR027W-B,YGR161C-D,YHR214C-B,YJR027W,YJR029W,YLR157C-B,YLR227W-B,YML039W,YML045W,YMR045C,YMR050C,YNL054W-B,YOL103W-B,YOR142W-B,YPL257W-B,YPR137C-B,YPR158C-D,YPR158W-B	2679.36	126.127	131594	127.13	25167	142502	15154.9	0.106349	9.40304
1	JL033021_040221_RPA2HFH_Q2_10to1_1ug.08222.08222.3	0.0312	K.STAASYK[425.27]IATM[147.04]K.V	YNL248C	1583.83	126.127	168726	127.13	29670.1	182734	16646.9	0.0910989	10.9771
1	JL033021_040221_RPA2HFH_Q2_10to1_1ug.08231.08231.3	2.93e-06	K.K[425.27]QVTNPIDEK.N	YOR340C	1467.8	126.127	156159	127.13	25408.9	169140	13208.9	0.0780945	12.805
1	JL033021_040221_RPA2HFH_Q2_10to1_1ug.08260.08260.3	2.92e-05	R.GK[425.27]NEIIQNAQR.D	RPB1-msCTD,YDL140C	1566.86	126.127	223364	127.13	42424	241882	25408.7	0.105046	9.51965
1	JL033021_040221_RPA2HFH_Q2_10to1_1ug.08266.08266.4	0.00127	R.LRHM[147.04]VNDK[425.27]FQVR.S	YPR010C	1855	126.127	168408	127.13	34284.2	182351	21619.8	0.118561	8.43446
1	JL033021_040221_RPA2HFH_Q2_10to1_1ug.08289.08289.4	0.00946	-.M[147.04]DYK[407.26]DHDGDYK[425.27]DH.D	3XFLAG	2229.98	126.127	442876	127.13	76519.6	479655	42238.7	0.0880606	11.3558
0.9712	JL033021_040221_RPA2HFH_Q2_10to1_1ug.08292.08292.3	0.00791	K.IQDK[425.27]EGIPPDQQR.L	YIL148W,YKR094C,YLL039C,YLR167W	1819.95	126.127	137433	127.13	27527	148815	17159.7	0.115308	8.6724
1	JL033021_040221_RPA2HFH_Q2_10to1_1ug.08303.08303.3	0.000143	R.VGK[425.27]GDDEANGATSFDR.T	YOR063W	1934.91	126.127	132748	127.13	23732.3	143766	13513.9	0.0939994	10.6384
1	JL033021_040221_RPA2HFH_Q2_10to1_1ug.08318.08318.3	2.65e-07	-.M[147.04]DYK[407.26]DHDGDYK[425.27]DH.D	3XFLAG	2229.98	126.127	180048	127.13	30098.2	195009	16089.3	0.0825055	12.1204
0.9669	JL033021_040221_RPA2HFH_Q2_10to1_1ug.08342.08342.4	0.0085	R.DYK[407.26]DHDGDYK[407.26]DHDIDYKDDDDK.-	RPB1-msCTD	3287.43	126.127	24549	127.13	3715.52	26592	1777.65	0.0668491	14.9591
1	JL033021_040221_RPA2HFH_Q2_10to1_1ug.08345.08345.3	0.000101	R.EFEYK[425.27]DQDQSSPK.V	YGL009C	1896.88	126.127	121499	127.131	19452.1	131602	9937.22	0.0755098	13.2433
1	JL033021_040221_RPA2HFH_Q2_10to1_1ug.08383.08383.3	7.74e-05	R.ETVESESSQTALSKSPNK[407.26]HNR.L	YDR385W,YOR133W	2607.3	126.126	36679.4	127.13	6853.04	39721.2	4050.78	0.10198	9.80582
1	JL033021_040221_RPA2HFH_Q2_10to1_1ug.08389.08389.4	4.09e-13	K.HIQEEEEQDVDM[147.04]TGDEEQEEEPDREKIK[425.27].L	YNL113W	3726.64	126.127	20014.3	127.13	3182.46	21678.7	1613.52	0.0744288	13.4357
1	JL033021_040221_RPA2HFH_Q2_10to1_1ug.08446.08446.4	0.00701	-.M[147.04]DYK[407.26]DHDGDYK[425.27]DH.D	3XFLAG	2229.98	126.127	289868	127.13	55200	313898	33129	0.105541	9.47501
0.9888	JL033021_040221_RPA2HFH_Q2_10to1_1ug.08450.08450.3	0.773	R.NM[147.04]SLGK[425.27]LSR.K	YLR342W	1317.72	126.127	116200	127.131	21733.4	125836	12857.5	0.102176	9.78702
1	JL033021_040221_RPA2HFH_Q2_10to1_1ug.08453.08453.4	1.56e-05	R.LEEDNDEEQSHK[425.27]KTKQAVSYDEPDEDEIETM[147.04]R.E	YOR341W	4149.85	126.127	6303.36			6835.8	-565.87	-0.0827804	-12.0802
1	JL033021_040221_RPA2HFH_Q2_10to1_1ug.08465.08465.4	0.000709	R.NGPNEHPGAK[425.27]YVIR.D	RPB1-msCTD,YDL140C	1847.97	126.127	163078	127.13	30248.6	176603	17773.9	0.100643	9.93613
0.9768	JL033021_040221_RPA2HFH_Q2_10to1_1ug.08478.08478.5	1.81e-06	R.LEEDNDEEQSHKKTK[425.27]QAVSYDEPDEDEIETM[147.04]R.E	YOR341W	4149.85	126.127	28202.2	127.13	4045.07	30551.1	1802.83	0.0590105	16.9461
0.9978	JL033021_040221_RPA2HFH_Q2_10to1_1ug.08527.08527.3	0.0144	R.FK[425.27]DELER.N	YER025W	1232.65	126.127	112725	127.13	20290.1	122079	11622.9	0.0952076	10.5034
0.9929	JL033021_040221_RPA2HFH_Q2_10to1_1ug.08573.08573.3	0.00552	K.K[425.27]LNTNVIR.V	YMR307W	1253.75	126.127	255376	127.13	45572.6	276572	25908.9	0.0936786	10.6748
1	JL033021_040221_RPA2HFH_Q2_10to1_1ug.08609.08609.3	0.0362	R.HM[147.04]VNDK[425.27]FQVR.S	YPR010C	1585.81	126.127	3.61157e+06	127.13	719923	3.9107e+06	447236	0.114362	8.74416
0.9999	JL033021_040221_RPA2HFH_Q2_10to1_1ug.08610.08610.3	0.0656	R.LSK[425.27]EDIEK.M	YAL005C,YLL024C	1257.69	126.127	267203	127.13	50006.2	289362	29598.1	0.102288	9.77635
1	JL033021_040221_RPA2HFH_Q2_10to1_1ug.08611.08611.3	4.02e-05	R.AK[425.27]IGGLNDPR.L	RPB1-msCTD,YDL140C	1336.75	126.127	200120	127.13	39147.6	216701	23984.6	0.11068	9.03502
0.9706	JL033021_040221_RPA2HFH_Q2_10to1_1ug.08643.08643.3	0.188	R.LSLEK[425.27]SGSDR.T	YJL130C	1387.74	126.127	129331	127.13	23941.9	140059	14045.3	0.100281	9.97194
0.9986	JL033021_040221_RPA2HFH_Q2_10to1_1ug.08674.08674.3	0.541	R.NTTVPTIK[425.27]R.R	YDL229W,YNL209W	1325.77	126.127	338076	127.13	57699.1	366157	31479.2	0.0859719	11.6317
0.9975	JL033021_040221_RPA2HFH_Q2_10to1_1ug.08692.08692.3	0.0331	R.LTAEGNK[425.27]WR.T	YOR341W	1370.74	126.127	1.18654e+06	127.13	193192	1.28518e+06	100501	0.0782004	12.7877
0.9506	JL033021_040221_RPA2HFH_Q2_10to1_1ug.08744.08744.3	0.233	R.ILK[425.27]M[147.04]SPM[147.04]IAK.L	YOL145C	1459.82	126.127	114184	127.13	19486.8	123668	10631.1	0.0859645	11.6327
0.9999	JL033021_040221_RPA2HFH_Q2_10to1_1ug.08747.08747.3	0.0149	R.K[425.27]M[147.04]M[147.04]SFQANPTEESISK.F	YBR154C	2156.02	126.127	71966.7	127.131	13227.3	77936.7	7713.47	0.098971	10.104
0.9639	JL033021_040221_RPA2HFH_Q2_10to1_1ug.08777.08777.3	0.0807	K.ARTK[407.26]RLVQFEAR.-	YHR143W-A	1753.02	126.127	127617	127.13	24233.8	138197	14511.9	0.105009	9.52304
1	JL033021_040221_RPA2HFH_Q2_10to1_1ug.08782.08782.3	0.00242	R.ILK[425.27]M[147.04]SPM[147.04]IAK.L	YOL145C	1459.82	126.127	111788	127.13	19896.8	121067	11285.5	0.0932167	10.7277
1	JL033021_040221_RPA2HFH_Q2_10to1_1ug.08787.08787.4	3.3e-08	K.YK[425.27]DESDREHLESLPEM[147.04]ER.E	YGL244W	2575.19	126.127	101277	127.131	18779.2	109677	11031.5	0.100582	9.94215
1	JL033021_040221_RPA2HFH_Q2_10to1_1ug.08809.08809.5	7.97e-07	K.YK[425.27]DESDREHLESLPEM[147.04]ER.E	YGL244W	2575.19	126.127	104964	127.13	18212.9	113680	10093.7	0.0887899	11.2625
1	JL033021_040221_RPA2HFH_Q2_10to1_1ug.08848.08848.4	4.83e-06	K.YK[425.27]DESDREHLESLPEM[147.04]ER.E	YGL244W	2575.19	126.127	95676.2	127.131	15428.4	103631	7943.72	0.076654	13.0456
0.9675	JL033021_040221_RPA2HFH_Q2_10to1_1ug.08858.08858.4	0.0225	R.ADLSK[425.27]PITEEEHDR.Y	YPL190C	1935.96	126.127	172026	127.13	31384.8	186298	18188.1	0.0976291	10.2428
1	JL033021_040221_RPA2HFH_Q2_10to1_1ug.08949.08949.4	1.78e-05	D.PK[425.27]ELYNNAHVYAR.D	YPR110C	1870.98	126.127	142580	127.13	29391	154381	18695.1	0.121097	8.25784
1	JL033021_040221_RPA2HFH_Q2_10to1_1ug.08965.08965.4	5.34e-08	R.RTEYVSNTIAAHDNTSLK[425.27]R.K	YBR279W	2472.28	126.127	155682	127.131	29350.9	168590	17475.9	0.103659	9.64698
1	JL033021_040221_RPA2HFH_Q2_10to1_1ug.08972.08972.3	2.73e-14	D.PK[425.27]ELYNNAHVYAR.D	YPR110C	1870.98	126.127	131319	127.13	26439.3	142193	16543	0.116342	8.59538
1	JL033021_040221_RPA2HFH_Q2_10to1_1ug.08975.08975.4	1.33e-09	R.RTEYVSNTIAAHDNTSLK[425.27]R.K	YBR279W	2472.28	126.127	167393	127.131	31215.3	181276	18422.4	0.101626	9.83996
1	JL033021_040221_RPA2HFH_Q2_10to1_1ug.08989.08989.4	2.36e-06	D.PK[425.27]ELYNNAHVYAR.D	YPR110C	1870.98	126.127	195755	127.13	39389	211966	24635	0.116222	8.60424
1	JL033021_040221_RPA2HFH_Q2_10to1_1ug.08991.08991.4	0.000796	R.YAGEVSHDDK[425.27]HIIVDGK.K	YGR192C	2179.1	126.127	120163	127.13	19397.8	130153	9999.01	0.0768251	13.0166
1	JL033021_040221_RPA2HFH_Q2_10to1_1ug.09000.09000.3	2.3e-08	D.PK[425.27]ELYNNAHVYAR.D	YPR110C	1870.98	126.127	107742	127.13	21019.4	116670	12851.7	0.110154	9.0782
0.9995	JL033021_040221_RPA2HFH_Q2_10to1_1ug.09011.09011.3	0.0109	R.DK[425.27]GEILQR.C	YLR447C	1254.7	126.127	116427	127.13	19840.5	126098	10808.8	0.0857175	11.6662
1	JL033021_040221_RPA2HFH_Q2_10to1_1ug.09041.09041.3	3.8e-08	R.NK[425.27]NNDIESSSPSQLQHEA.-	YML123C	2294.09	126.126	64024.2	127.13	10019.8	69349.7	4989.36	0.071945	13.8995
0.9986	JL033021_040221_RPA2HFH_Q2_10to1_1ug.09045.09045.3	0.0319	S.NTVFDAK[425.27]R.L	YAL005C,YBL075C,YDL229W,YER103W,YLL024C,YNL209W	1246.68	126.127	338570	127.13	59244	366681	33090.4	0.090243	11.0812
1	JL033021_040221_RPA2HFH_Q2_10to1_1ug.09051.09051.3	1.14e-08	R.NK[425.27]NNDIESSSPSQLQHEA.-	YML123C	2294.09	126.127	60512.5	127.13	9905.11	65542.3	5181.76	0.0790597	12.6487
0.9846	JL033021_040221_RPA2HFH_Q2_10to1_1ug.09059.09059.4	0.144	R.RTEYVSNTIAAHDNTSLK[425.27]R.K	YBR279W	2472.28	126.127	62834.2	127.13	11959.2	68043.2	7174.47	0.10544	9.48407
0.981	JL033021_040221_RPA2HFH_Q2_10to1_1ug.09099.09099.4	0.427	K.LQK[425.27]DK[425.27]VSLEDRR.V	YOR341W	2080.18	126.127	243562	127.13	41923.6	263790	23059.3	0.0874151	11.4397
1	JL033021_040221_RPA2HFH_Q2_10to1_1ug.09166.09166.3	5.54e-10	R.K[425.27]M[147.04]M[147.04]SFQANPTEESISK.F	YBR154C	2156.02	126.127	181441	127.13	26704.9	196547	12328	0.062723	15.9431
1	JL033021_040221_RPA2HFH_Q2_10to1_1ug.09301.09301.3	5.42e-10	R.K[425.27]M[147.04]M[147.04]SFQANPTEESISK.F	YBR154C	2156.02	126.127	167941	127.13	25263.3	181918	11995.2	0.0659373	15.1659
0.9876	JL033021_040221_RPA2HFH_Q2_10to1_1ug.09313.09313.3	0.151	R.RKPDQKLLDK[407.26].L	DECOY_YHR152W_UNMAPPED	1518.9	126.127	146802	127.13	23991.2	159005	12529.7	0.0788004	12.6903
0.9873	JL033021_040221_RPA2HFH_Q2_10to1_1ug.09347.09347.3	0.241	-.MSK[407.26]VIKPPGQAR.T	YPR010C	1589.92	126.127	188200	127.13	34613	203812	20195.4	0.0990884	10.092
0.9999	JL033021_040221_RPA2HFH_Q2_10to1_1ug.09433.09433.3	0.0245	R.VLPNEK[425.27]TLR.L	YOR341W	1365.81	126.127	5.15356e+06	127.13	926595	5.58124e+06	530272	0.0950096	10.5252
1	JL033021_040221_RPA2HFH_Q2_10to1_1ug.09436.09436.3	7.63e-06	K.AK[425.27]M[147.04]NQLSPLER.V	YLR342W	1598.85	126.127	128140	127.13	22143.1	138781	12224.7	0.0880865	11.3525
0.985	JL033021_040221_RPA2HFH_Q2_10to1_1ug.09466.09466.4	0.212	K.RYRLK[407.26]ESQLPR.L	YBR154C	1723.99	126.127	58196.5	127.13	12550.2	63008.9	8224.06	0.130522	7.66153
0.9993	JL033021_040221_RPA2HFH_Q2_10to1_1ug.09467.09467.3	0.0944	R.ALM[147.04]QLK[425.27]YM[147.04]R.S	YOR341W	1481.78	126.127	223385	127.13	38337.4	241938	21027.8	0.0869138	11.5057
0.9986	JL033021_040221_RPA2HFH_Q2_10to1_1ug.09470.09470.4	0.11	K.RYRLK[407.26]ESQLPR.L	YBR154C	1723.99	126.127	51772.1	127.13	11090.5	56053.9	7236.64	0.129101	7.74585
1	JL033021_040221_RPA2HFH_Q2_10to1_1ug.09498.09498.3	0.0145	R.RKPDQKLLDK[407.26].L	DECOY_YHR152W_UNMAPPED	1518.9	126.127	467513	127.13	67958.1	506443	30852.7	0.0609204	16.4149
0.9997	JL033021_040221_RPA2HFH_Q2_10to1_1ug.09547.09547.3	0.068	-.MSK[407.26]VIKPPGQAR.T	YPR010C	1589.92	126.127	175078	127.131	29177.8	189626	15549.1	0.0819987	12.1953
1	JL033021_040221_RPA2HFH_Q2_10to1_1ug.09565.09565.3	1.89e-05	K.VNAITSQVVSK[425.27].C	YOR341W	1441.82	126.127	124219	127.13	22291.4	134528	12735.6	0.0946686	10.5632
1	JL033021_040221_RPA2HFH_Q2_10to1_1ug.09590.09590.4	1.24e-08	R.HK[425.27]NVPVHVSPAFR.V	YBR048W,YDR025W	1783.99	126.127	69125	127.13	13521.7	74852.5	8284.11	0.110672	9.03567
1	JL033021_040221_RPA2HFH_Q2_10to1_1ug.09638.09638.3	0.00527	R.ALM[147.04]QLK[425.27]YM[147.04]R.S	YOR341W	1481.78	126.127	575146	127.13	100845	622897	56430.9	0.0905943	11.0382
1	JL033021_040221_RPA2HFH_Q2_10to1_1ug.09642.09642.4	1.31e-05	Q.EPK[407.26]HIQEEEEQDVDM[147.04]TGDEEQEEEPDREK.L	YNL113W	3821.64	126.126	25816.8	127.13	4768.71	27958.2	2792.41	0.0998778	10.0122
1	JL033021_040221_RPA2HFH_Q2_10to1_1ug.09644.09644.4	6.85e-05	R.M[147.04]HSAGK[425.27]GISSSAIPYSR.N	YDR064W	2061.04	126.127	101554	127.13	18171.6	109983	10355.5	0.0941556	10.6207
0.9998	JL033021_040221_RPA2HFH_Q2_10to1_1ug.09645.09645.3	0.0597	R.M[147.04]HSAGK[425.27]GISSSAIPYSR.N	YDR064W	2061.04	126.127	166683	127.13	26189.1	180547	13100.1	0.0725582	13.782
1	JL033021_040221_RPA2HFH_Q2_10to1_1ug.09654.09654.3	0.00521	K.AK[425.27]M[147.04]NQLSPLER.V	YLR342W	1598.85	126.127	98013.7	127.13	16554.3	106156	8940.26	0.0842178	11.874
0.9625	JL033021_040221_RPA2HFH_Q2_10to1_1ug.09661.09661.5	1.07e-09	K.KTATEVTPQEPK[425.27]HIQEEEEQDVDM[147.04]TGDEEQEEEPDREK.L	YNL113W	4795.15	126.127	39595.5	127.13	4631.67	42902	1408.61	0.0328333	30.4569
0.9834	JL033021_040221_RPA2HFH_Q2_10to1_1ug.09666.09666.3	1.11	R.YNPLEK[425.27]RD.-	YOR210W	1330.7	126.127	245008	127.13	46383.1	265321	27708.3	0.104433	9.57552
0.9987	JL033021_040221_RPA2HFH_Q2_10to1_1ug.09679.09679.3	0.0617	R.ALM[147.04]QLK[425.27]YMRS.L	YOR341W	1552.82	126.127	203929	127.13	36588.6	220853	20900.3	0.0946345	10.567
0.9974	JL033021_040221_RPA2HFH_Q2_10to1_1ug.09681.09681.3	0.534	R.YNPLEK[425.27]R.D	YOR210W	1215.67	126.127	230512	127.13	42484.7	249633	24832.1	0.0994742	10.0529
1	JL033021_040221_RPA2HFH_Q2_10to1_1ug.09695.09695.3	0.000131	K.K[425.27]TGLDISDDAR.A	YDL229W,YNL209W	1486.77	126.127	179983	127.13	33523.5	194910	19765.6	0.101409	9.86104
0.9996	JL033021_040221_RPA2HFH_Q2_10to1_1ug.09719.09719.3	0.0522	R.RKPDQKLLDK[407.26].L	DECOY_YHR152W_UNMAPPED	1518.9	126.127	101477	127.13	16896.7	109910	8996.33	0.0818522	12.2171
0.995	JL033021_040221_RPA2HFH_Q2_10to1_1ug.09751.09751.3	0.0457	S.LNQEASAK[425.27]PLMLGTYR.Q	YBR033W	2088.11	126.127	191078	127.13	32310.8	206952	17470	0.0844157	11.8461
0.9772	JL033021_040221_RPA2HFH_Q2_10to1_1ug.09756.09756.3	0.0702	S.LNQEASAK[425.27]PLMLGTYR.Q	YBR033W	2088.11	126.127	177334	127.13	26463.9	192095	12438.4	0.0647515	15.4437
0.9932	JL033021_040221_RPA2HFH_Q2_10to1_1ug.09819.09819.3	0.0767	R.STGPVNSLTM[147.04]QPVK[425.27]GR.K	YPR010C	1984.05	126.127	385850	127.13	71970.9	417850	42483.8	0.101672	9.83551
0.9936	JL033021_040221_RPA2HFH_Q2_10to1_1ug.09820.09820.3	0.251	R.YNPLEK[425.27]RD.-	YOR210W	1330.7	126.127	402818	127.131	81833.6	436170	51529.3	0.118141	8.4645
0.9987	JL033021_040221_RPA2HFH_Q2_10to1_1ug.09846.09846.3	0.363	R.ALM[147.04]QLK[425.27]YM[147.04]R.S	YOR341W	1481.78	126.127	137505	127.13	26421.4	148902	15968.5	0.107242	9.32472
1	JL033021_040221_RPA2HFH_Q2_10to1_1ug.09860.09860.4	0.00847	R.RTPQIGDK[425.27]FSSR.H	YPR010C	1687.91	126.127	710677	127.13	131012	769628	76590.8	0.0995167	10.0486
0.9798	JL033021_040221_RPA2HFH_Q2_10to1_1ug.09935.09935.5	4.18e-06	R.LEEDNDEEQSHKKTK[407.26]QAVSYDEPDEDEIETM[147.04]R.E	YOR341W	4131.84	126.126	62668	127.13	9948.12	67879.5	5034.34	0.0741657	13.4833
1	JL033021_040221_RPA2HFH_Q2_10to1_1ug.09936.09936.3	8.29e-06	R.TSLVDPDTPDTAK[425.27]TR.E	YPR159W	1912.98	126.127	144905	127.131	24839.9	156940	13609.5	0.0867176	11.5317
0.9907	JL033021_040221_RPA2HFH_Q2_10to1_1ug.09943.09943.3	0.177	K.LNK[425.27]ETTYDEIK.K	YGR192C,YJR009C	1649.86	126.127	140008	127.131	25708.6	151622	14980	0.0987981	10.1217
1	JL033021_040221_RPA2HFH_Q2_10to1_1ug.09968.09968.4	0.025	R.RTPQIGDK[425.27]FSSR.H	YPR010C	1687.91	126.127	664904	127.13	121144	720069	70126	0.0973878	10.2682
1	JL033021_040221_RPA2HFH_Q2_10to1_1ug.09971.09971.3	9.26e-06	R.GIVK[425.27]QIVHDSGR.G	YFR031C-A,YIL018W	1604.91	126.127	119377	127.131	20891.5	129288	11670.2	0.0902653	11.0785
1	JL033021_040221_RPA2HFH_Q2_10to1_1ug.09975.09975.3	0.000785	K.FTEK[425.27]IK[425.27]SM[147.04].-	YNL113W	1592.86	126.127	269520	127.13	59121.3	291799	39157.7	0.134194	7.4519
1	JL033021_040221_RPA2HFH_Q2_10to1_1ug.10099.10099.3	0.000364	-.MSSVNK[407.26]DTIHVAER.S	YML123C	1864.95	126.127	119872	127.131	20929.6	129825	11666.5	0.0898632	11.128
1	JL033021_040221_RPA2HFH_Q2_10to1_1ug.10121.10121.3	0.0285	R.K[425.27]GDINPEVSM[147.04]IR.D	YOR151C	1670.87	126.127	122655	127.13	22175.6	132833	12751.8	0.0959991	10.4168
1	JL033021_040221_RPA2HFH_Q2_10to1_1ug.10139.10139.4	3.73e-07	R.TEYVSNTIAAHDNTSLK[425.27]R.K	YBR279W	2316.18	126.127	180422	127.131	30081.8	195414	16038.1	0.0820724	12.1844
1	JL033021_040221_RPA2HFH_Q2_10to1_1ug.10140.10140.3	4.78e-10	K.STGK[425.27]SSNITISNAVGR.L	YDL229W,YNL209W	1888.01	126.127	176944	127.13	29626	191646	15861.9	0.0827667	12.0822
1	JL033021_040221_RPA2HFH_Q2_10to1_1ug.10146.10146.3	0.00359	R.STGPVNSLTM[147.04]QPVK[425.27]GR.K	YPR010C	1984.05	126.127	221854	127.13	38441.8	240277	21277.1	0.0885523	11.2928
1	JL033021_040221_RPA2HFH_Q2_10to1_1ug.10147.10147.4	0.011	K.AVYAGENFHHGDK[425.27]L.-	YHR174W	1853.91	126.127	92588.1	127.13	14571.6	100289	7302.79	0.0728175	13.733
0.9999	JL033021_040221_RPA2HFH_Q2_10to1_1ug.10167.10167.3	0.0605	R.SLEDNETEIK[425.27]VSR.D	YAR009C,YBL005W-B,YBR012W-B,YDR098C-B,YDR210C-D,YDR261C-D,YDR316W-B,YDR365W-B,YER138C,YER160C,YGR027W-B,YGR038C-B,YGR161C-D,YHR214C-B,YJR027W,YJR029W,YLR035C-A,YLR157C-B,YLR227W-B,YML039W,YML045W,YMR045C,YMR050C,YNL054W-B,YNL284C-B,YOL103W-B,YOR142W-B,YPL257W-B,YPR137C-B,YPR158C-D,YPR158W-B	1815.93	126.127	147738	127.13	24559.8	160015	13055	0.0815858	12.257
1	JL033021_040221_RPA2HFH_Q2_10to1_1ug.10199.10199.4	1.69e-06	R.STGPVNSLTM[147.04]QPVK[425.27]GR.K	YPR010C	1984.05	126.127	163850	127.13	29924.8	177443	17357.6	0.0978205	10.2228
0.9635	JL033021_040221_RPA2HFH_Q2_10to1_1ug.10235.10235.5	5.46e-05	K.RLEEDNDEEQSHK[425.27]KTK[407.26]QAVSYDEPDEDEIETM[147.04]R.E	YOR341W	4585.12	126.126	58622.7	127.13	8732.74	63502.5	4095.12	0.0644875	15.5069
1	JL033021_040221_RPA2HFH_Q2_10to1_1ug.10294.10294.3	8e-06	R.STGPVNSLTM[147.04]QPVK[425.27]GR.K	YPR010C	1984.05	126.127	777040	127.13	147510	841460	88312.1	0.104951	9.52825
1	JL033021_040221_RPA2HFH_Q2_10to1_1ug.10357.10357.3	0.00049	R.M[147.04]DAFK[425.27]NHGLYYR.S	YPR159W	1826.89	126.127	148393	127.13	26725.6	160707	15317	0.0953099	10.4921
1	JL033021_040221_RPA2HFH_Q2_10to1_1ug.10363.10363.4	2.68e-10	K.TATEVTPQEPK[425.27]HIQEEEEQDVDM[147.04]TGDEEQEEEPDREK.L	YNL113W	4667.05	126.127	18319.1	127.13	2761.75	19843.8	1314.89	0.066262	15.0916
1	JL033021_040221_RPA2HFH_Q2_10to1_1ug.10368.10368.4	0.00112	R.M[147.04]DAFK[425.27]NHGLYYR.S	YPR159W	1826.89	126.127	116571	127.13	20348.5	126250	11340.2	0.0898234	11.133
1	JL033021_040221_RPA2HFH_Q2_10to1_1ug.10389.10389.5	5.11e-14	K.TATEVTPQEPK[425.27]HIQEEEEQDVDM[147.04]TGDEEQEEEPDREK.L	YNL113W	4667.05	126.127	111026	127.13	15417	120277	6553.48	0.0544864	18.3532
1	JL033021_040221_RPA2HFH_Q2_10to1_1ug.10391.10391.3	5.55e-16	K.TK[425.27]QAVSYDEPDEDEIETM[147.04]R.E	YOR341W	2568.16	126.127	165552	127.13	24173	179337	11041.3	0.0615674	16.2424
1	JL033021_040221_RPA2HFH_Q2_10to1_1ug.10453.10453.3	0.000617	R.GEAK[425.27]TALAEVQAR.H	YMR183C,YPL232W	1639.9	126.127	86569.5	127.13	13784	93768.4	6999.05	0.0746419	13.3973
1	JL033021_040221_RPA2HFH_Q2_10to1_1ug.10464.10464.3	7.1e-06	R.LIGDAAK[425.27]NQAALNPR.N	YDL229W,YNL209W	1848.03	126.128	204498	127.131	35771.8	221476	19974.1	0.0901862	11.0882
0.9747	JL033021_040221_RPA2HFH_Q2_10to1_1ug.10487.10487.4	0.428	K.LVHEFHK[425.27]K[425.27]LLSR.G	YOR341W	2100.24	126.127	208326	127.13	42214.8	225575	26534.6	0.117631	8.50118
0.9949	JL033021_040221_RPA2HFH_Q2_10to1_1ug.10525.10525.4	0.303	R.GM[147.04]AINFK[425.27]DK[425.27]R.Y	YPR010C	1788.97	126.127	397052	127.13	99216	429773	70673.6	0.164444	6.08109
0.9998	JL033021_040221_RPA2HFH_Q2_10to1_1ug.10546.10546.4	0.0105	R.FDELLEK[425.27]NDRR.S	YBR118W,YPR080W	1730.9	126.127	132740	127.13	23204.1	143761	12948.6	0.0900708	11.1024
1	JL033021_040221_RPA2HFH_Q2_10to1_1ug.10566.10566.3	0.00328	R.FK[425.27]DVEVVR.Y	YLR418C	1287.73	126.127	143486	127.13	24213.9	155406	13066	0.0840768	11.8939
1	JL033021_040221_RPA2HFH_Q2_10to1_1ug.10583.10583.3	1.93e-15	K.K[407.26]TKQAVSYDEPDEDEIETM[147.04]R.E	YOR341W	2678.25	126.127	209171	127.13	33265.3	226565	16868.6	0.0744536	13.4312
0.9841	JL033021_040221_RPA2HFH_Q2_10to1_1ug.10619.10619.5	5.59e-09	R.LEEDNDEEQSHK[407.26]K[425.27]TKQAVSYDEPDEDEIETM[147.04]R.E	YOR341W	4429.02	126.128	263200	127.131	49752.5	285022	29685.7	0.104152	9.60131
1	JL033021_040221_RPA2HFH_Q2_10to1_1ug.10622.10622.3	0.00129	R.LIGDAAK[425.27]NQAALNPR.N	YDL229W,YNL209W	1848.03	126.127	174375	127.131	30031.8	188857	16527.4	0.0875129	11.4269
1	JL033021_040221_RPA2HFH_Q2_10to1_1ug.10647.10647.3	0.00169	R.APK[425.27]GQNTLILR.G	YNL301C,YOL120C	1506.9	126.127	118932	127.13	20709.7	128808	11515.3	0.0893989	11.1858
0.987	JL033021_040221_RPA2HFH_Q2_10to1_1ug.10656.10656.6	0.00275	R.LEEDNDEEQSHK[425.27]K[425.27]TK[425.27]QAVSYDEPDEDEIETM[147.04]R.E	YOR341W	4744.21	126.127	274443	127.13	45993	297246	24647.8	0.0829204	12.0598
0.999	JL033021_040221_RPA2HFH_Q2_10to1_1ug.10658.10658.4	0.0502	R.ENPPAK[425.27]VQVDHIVR.N	YJL115W	1898.05	126.127	163925	127.13	29189.9	177531	16563.3	0.0932983	10.7183
0.9834	JL033021_040221_RPA2HFH_Q2_10to1_1ug.10665.10665.3	5.35e-07	K.KK[407.26]TGLDISDDAR.A	YDL229W,YNL209W	1596.86	126.127	129447	127.13	20194.7	140214	10019.5	0.0714586	13.9941
1	JL033021_040221_RPA2HFH_Q2_10to1_1ug.10669.10669.5	6.11e-07	R.LEEDNDEEQSHK[425.27]K[425.27]TK[425.27]QAVSYDEPDEDEIETM[147.04]R.E	YOR341W	4744.21	126.127	112688	127.13	21202.6	122032	12604	0.103284	9.68201
0.98	JL033021_040221_RPA2HFH_Q2_10to1_1ug.10682.10682.5	1.76e-06	R.LEEDNDEEQSHK[425.27]K[407.26]TKQAVSYDEPDEDEIETM[147.04]R.E	YOR341W	4429.02	126.127	133518	127.13	26120.9	144580	16004.4	0.110696	9.03376
0.9897	JL033021_040221_RPA2HFH_Q2_10to1_1ug.10700.10700.5	4.58e-11	R.NPDAPK[425.27]GSTDPKELYNNAHVYAR.D	YPR110C	2853.41	126.127	147527	127.13	31005.9	159733	19981.4	0.125092	7.9941
1	JL033021_040221_RPA2HFH_Q2_10to1_1ug.10727.10727.3	0.0194	K.TNIAHAISK[425.27]IR.G	YBL017C	1519.89	126.127	129037	127.13	22671.7	139749	12710.6	0.0909528	10.9947
1	JL033021_040221_RPA2HFH_Q2_10to1_1ug.10734.10734.3	0.00179	R.DLK[425.27]FEPQGR.Q	YPR110C	1385.74	126.127	622881	127.13	125358	674462	78413.9	0.116261	8.60131
0.9996	JL033021_040221_RPA2HFH_Q2_10to1_1ug.10754.10754.4	0.057	R.KALANQLLTPSSNVSTHTLNK[425.27].K	YOR341W	2533.39	126.127	142783	127.13	24667.2	154641	13614.9	0.0880424	11.3582
1	JL033021_040221_RPA2HFH_Q2_10to1_1ug.10756.10756.3	0.00273	R.LQVK[425.27]TLENNVK.Q	YGL009C	1581.92	126.127	123133	127.131	20205.6	133367	10598	0.0794645	12.5842
0.9903	JL033021_040221_RPA2HFH_Q2_10to1_1ug.10821.10821.3	0.162	K.QSVK[425.27]YDPVLAK.Y	YOR341W	1543.87	126.127	109172	127.131	17243.7	118252	8677.33	0.0733801	13.6277
1	JL033021_040221_RPA2HFH_Q2_10to1_1ug.10863.10863.3	2.46e-05	R.TPQIGDK[425.27]FSSR.H	YPR010C	1531.81	126.127	289484	127.13	50876.6	313517	28530.6	0.0910018	10.9888
1	JL033021_040221_RPA2HFH_Q2_10to1_1ug.10867.10867.3	3.67e-09	-.MSSESPQDQPQK[407.26]EQISNNVGVTTNSTSNEETSR.S	YOR123C	3887.78	126.127	13208.4	127.13	2220.03	14305.8	1193.19	0.0834059	11.9896
0.9976	JL033021_040221_RPA2HFH_Q2_10to1_1ug.10871.10871.3	1.4e-10	R.AADTPETSDAVHTEQK[407.26]PEEEKETLQEE.-	YBR279W	3319.53	126.127	136247	127.131	22494.8	147570	11873.7	0.0804614	12.4283
1	JL033021_040221_RPA2HFH_Q2_10to1_1ug.10890.10890.3	0.00731	R.DLK[425.27]FEPQGR.Q	YPR110C	1385.74	126.127	96250	127.13	19804	104217	12581	0.12072	8.28366
1	JL033021_040221_RPA2HFH_Q2_10to1_1ug.10911.10911.3	1.94e-07	R.TDILK[425.27]TSVDTGR.E	YOR341W	1601.87	126.127	314866	127.13	58507.5	340981	34429.1	0.100971	9.90387
1	JL033021_040221_RPA2HFH_Q2_10to1_1ug.10913.10913.3	0.00837	R.NPTTRPK[425.27]TGSTYILSTEVK.N	YOR341W	2389.29	126.127	240862	127.131	40767.9	260872	22063.2	0.084575	11.8238
1	JL033021_040221_RPA2HFH_Q2_10to1_1ug.10919.10919.4	4.34e-05	R.NPTTRPK[425.27]TGSTYILSTEVK.N	YOR341W	2389.29	126.128	222648	127.131	41097.9	241116	24052	0.0997527	10.0248
0.9617	JL033021_040221_RPA2HFH_Q2_10to1_1ug.10926.10926.3	4.94e-06	R.TASGNIIPSSTGAAK[425.27]AVGK.V	YGR192C,YJL052W,YJR009C	2026.11	126.127	227987	127.13	41766.1	246901	24288.7	0.0983745	10.1652
0.971	JL033021_040221_RPA2HFH_Q2_10to1_1ug.10963.10963.3	0.000214	R.LK[407.26]LEKQAEEYR.K	YOL145C	1684.92	126.127	119388	127.13	19962.7	129309	10673.8	0.0825454	12.1145
0.9847	JL033021_040221_RPA2HFH_Q2_10to1_1ug.11009.11009.5	7.13e-07	R.LEEDNDEEQSHK[407.26]K[425.27]TKQAVSYDEPDEDEIETM[147.04]R.E	YOR341W	4429.02	126.127	237492	127.13	43938.4	257190	25763.3	0.100172	9.9828
1	JL033021_040221_RPA2HFH_Q2_10to1_1ug.11024.11024.3	0.000132	R.TPQIGDK[425.27]FSSR.H	YPR010C	1531.81	126.127	227408	127.13	43755.5	246256	26472.6	0.1075	9.3023
0.9956	JL033021_040221_RPA2HFH_Q2_10to1_1ug.11039.11039.3	1.26e-05	R.K[407.26]KVM[147.04]PAIVVR.Q	YBL087C,YER117W	1434.88	126.127	95903.3	127.13	15947.8	103873	8479.85	0.081637	12.2494
0.9951	JL033021_040221_RPA2HFH_Q2_10to1_1ug.11107.11107.3	0.0472	R.IQLGETTM[147.04]K[425.27]SALER.S	YOL145C	1889	126.127	363158	127.13	67602.2	393276	39839.5	0.101302	9.87151
1	JL033021_040221_RPA2HFH_Q2_10to1_1ug.11160.11160.3	0.00993	K.QVAEK[425.27]PM[147.04]TELAIR.L	YBR279W	1797.97	126.128	163069	127.131	27462.1	176617	14788.7	0.0837331	11.9427
1	JL033021_040221_RPA2HFH_Q2_10to1_1ug.11162.11162.3	1.95e-06	R.TSGK[425.27]VPIPGVK.Q	YOR341W	1378.83	126.127	116454	127.13	20124.2	126124	11110.4	0.0880909	11.3519
0.9682	JL033021_040221_RPA2HFH_Q2_10to1_1ug.11167.11167.4	0.000107	R.ALDNSQM[147.04]IK[425.27]PSLHSLSNK.T	YGL244W	2295.2	126.127	81199.9	127.131	14525.1	87939.1	8275.29	0.0941025	10.6267
0.9916	JL033021_040221_RPA2HFH_Q2_10to1_1ug.11177.11177.3	0.0296	K.QK[425.27]ANDFSC[160.03]TV.H	YPR179C	1465.7	126.127	53154.3	127.13	9742.59	57563.9	5668.16	0.0984673	10.1557
0.992	JL033021_040221_RPA2HFH_Q2_10to1_1ug.11183.11183.4	0.00754	R.LDQIFVRPNPDTK[425.27]R.V	YGL207W	1995.1	126.127	213411	127.13	36612.2	231135	20074.5	0.0868518	11.5139
1	JL033021_040221_RPA2HFH_Q2_10to1_1ug.11192.11192.3	0.00277	R.VTPTK[425.27]TEVIIR.A	YNL178W	1552.93	126.127	166298	127.13	28724.8	180108	15851.9	0.0880131	11.362
1	JL033021_040221_RPA2HFH_Q2_10to1_1ug.11201.11201.3	1.16e-05	K.TEK[425.27]VDLALNR.N	YPR010C	1454.82	126.128	247526	127.131	40472	268100	21148	0.0788809	12.6773
0.9763	JL033021_040221_RPA2HFH_Q2_10to1_1ug.11208.11208.3	0.00564	R.NALGEAFGTK[425.27]K.A	YNL248C	1431.78	126.127	211520	127.13	43939	229025	28095.4	0.122674	8.15169
0.9985	JL033021_040221_RPA2HFH_Q2_10to1_1ug.11219.11219.3	2.43e-06	R.SQAESLPIVSNK[425.27]K.L	YOR340C	1696.94	126.127	163697	127.13	25112.2	177318	12214.2	0.0688832	14.5173
1	JL033021_040221_RPA2HFH_Q2_10to1_1ug.11221.11221.3	0.000693	N.NK[425.27]SGILDAVTSSK.V	YOR341W	1615.89	126.127	89827.3	127.13	15935.1	97283.6	9011.66	0.0926329	10.7953
1	JL033021_040221_RPA2HFH_Q2_10to1_1ug.11291.11291.4	5.1e-07	R.AADTPETSDAVHTEQK[425.27]PEEEK[425.27]ETLQEE.-	YBR279W	3634.72	126.127	213597	127.131	44044.1	231277	28021.6	0.121161	8.25351
1	JL033021_040221_RPA2HFH_Q2_10to1_1ug.11314.11314.3	3.12e-05	R.YASK[425.27]EM[147.04]SATFSLR.N	YLR359W	1802.9	126.127	111593	127.13	21465.9	120842	12984.5	0.10745	9.30667
0.9999	JL033021_040221_RPA2HFH_Q2_10to1_1ug.11324.11324.3	0.00761	R.TSGK[425.27]VPIPGVK.Q	YOR341W	1378.83	126.127	63850.5	127.13	13373.4	69133.7	8598.61	0.124377	8.0401
1	JL033021_040221_RPA2HFH_Q2_10to1_1ug.11365.11365.3	2.16e-05	K.TEK[425.27]VDLALNR.N	YPR010C	1454.82	126.127	101490	127.131	19860.4	109899	12171	0.110747	9.0296
1	JL033021_040221_RPA2HFH_Q2_10to1_1ug.11371.11371.3	0.00163	R.DLK[425.27]FEPQGR.Q	YPR110C	1385.74	126.127	70801.5	127.13	15604.3	76653.5	10365.2	0.135222	7.39526
1	JL033021_040221_RPA2HFH_Q2_10to1_1ug.11409.11409.3	1.44e-08	K.IASTAK[425.27]DNAPLQFDK.V	YJL148W	1915.01	126.127	162905	127.13	29479.7	176423	16965.5	0.0961639	10.3989
1	JL033021_040221_RPA2HFH_Q2_10to1_1ug.11447.11447.4	7.04e-08	K.GSTDPK[425.27]ELYNNAHVYAR.D	YPR110C	2231.11	126.127	86131.6	127.131	13479.6	93296	6712.21	0.0719454	13.8994
1	JL033021_040221_RPA2HFH_Q2_10to1_1ug.11468.11468.3	3.39e-05	K.K[425.27]TTVEFTGESLR.L	YBR127C	1663.89	126.127	91818.3	127.13	17301.3	99431.5	10297	0.103559	9.65636
1	JL033021_040221_RPA2HFH_Q2_10to1_1ug.11487.11487.3	4.91e-06	K.K[425.27]EFEHIGGVIGAR.V	YGR159C	1708.93	126.127	116955	127.13	20601.3	126664	11576.6	0.0913962	10.9414
1	JL033021_040221_RPA2HFH_Q2_10to1_1ug.11490.11490.4	2.34e-07	K.K[425.27]EFEHIGGVIGAR.V	YGR159C	1708.93	126.127	89829	127.13	14418.1	97298	7385.98	0.0759109	13.1733
1	JL033021_040221_RPA2HFH_Q2_10to1_1ug.11542.11542.3	0.000607	R.DLK[425.27]FEPQGR.Q	YPR110C	1385.74	126.127	76085.3	127.13	16004.6	82380.3	10319.8	0.125271	7.98272
1	JL033021_040221_RPA2HFH_Q2_10to1_1ug.11544.11544.3	1.8e-05	R.EGLIDTAVK[425.27]TSR.S	YOR341W	1585.88	126.127	354633	127.13	63688	384064	36410.5	0.0948033	10.5482
0.9913	JL033021_040221_RPA2HFH_Q2_10to1_1ug.11610.11610.3	0.161	R.IYLNQSK[425.27]FSGR.F	YML069W	1608.87	126.127	115653	127.131	20099.4	125257	11155.7	0.0890628	11.228
1	JL033021_040221_RPA2HFH_Q2_10to1_1ug.11679.11679.3	1.78e-06	R.SVAK[425.27]EGYGYFEDR.R	YPR035W	1816.87	126.127	114638	127.13	19868.9	124158	10999.8	0.088595	11.2873
0.9985	JL033021_040221_RPA2HFH_Q2_10to1_1ug.11750.11750.3	0.0928	R.TPQIGDK[407.26]FSSR.H	YPR010C	1513.8	126.127	108528	127.13	19898.6	117531	11580.1	0.0985278	10.1494
1	JL033021_040221_RPA2HFH_Q2_10to1_1ug.11765.11765.3	2.28e-07	R.AVLK[425.27]FAAHTGATPIAGR.F	YGR214W,YLR048W	1977.12	126.127	134024	127.13	23528.2	145151	13180.7	0.0908071	11.0124
1	JL033021_040221_RPA2HFH_Q2_10to1_1ug.11777.11777.3	0.00132	R.EGLIDTAVK[425.27]TSR.S	YOR341W	1585.88	126.127	144402	127.13	27393	156374	16390.4	0.104815	9.54059
0.9999	JL033021_040221_RPA2HFH_Q2_10to1_1ug.11786.11786.3	0.0158	R.VNTK[425.27]TGEIVNRD.E	YDR057W	1641.88	126.127	44595.4	127.131	8284.77	48294.1	4874.35	0.100931	9.90779
1	JL033021_040221_RPA2HFH_Q2_10to1_1ug.11796.11796.4	5.71e-05	R.AVLK[425.27]FAAHTGATPIAGR.F	YGR214W,YLR048W	1977.12	126.127	79185.8	127.13	14289.8	85756.8	8203.96	0.0956654	10.4531
1	JL033021_040221_RPA2HFH_Q2_10to1_1ug.11807.11807.6	1.75e-05	G.VWLTSK[407.26]DSFFTREQYQQYIYGC[160.03]IRPEDGHTTR.S	YOR341W	4260.06	126.127	141500	127.13	23633.4	153258	12622.3	0.0823599	12.1418
1	JL033021_040221_RPA2HFH_Q2_10to1_1ug.11810.11810.6	7.57e-07	V.WLTSK[425.27]DSFFTREQYQQYIYGC[160.03]IRPEDGHTTR.S	YOR341W	4179	126.127	126936	127.13	23616.2	137464	13911.2	0.101199	9.88148
1	JL033021_040221_RPA2HFH_Q2_10to1_1ug.11830.11830.3	0.116	R.K[425.27]YPYPFIHR.M	YBL005W-B,YBR012W-B,YDR098C-B,YDR210C-D,YDR261C-D,YDR316W-B,YDR365W-B,YER138C,YER160C,YGR027W-B,YGR038C-B,YGR161C-D,YHR214C-B,YJR027W,YJR029W,YLR157C-B,YLR227W-B,YML039W,YML045W,YMR045C,YMR050C,YNL054W-B,YNL284C-B,YOL103W-B,YOR142W-B,YPL257W-B,YPR137C-B,YPR158C-D,YPR158W-B	1516.83	126.127	99504	127.13	18873.5	107754	11291.7	0.104792	9.54269
1	JL033021_040221_RPA2HFH_Q2_10to1_1ug.11841.11841.3	6.28e-15	R.PK[425.27]TGSTYILSTEVK.N	YOR341W	1820	126.127	150508	127.131	29311.1	162980	17897.7	0.109815	9.10619
1	JL033021_040221_RPA2HFH_Q2_10to1_1ug.11848.11848.3	0.000181	R.M[147.04]SEVISK[425.27]VYSDTR.L	YGR001C	1826.92	126.127	127154	127.13	24808.5	137691	15169.3	0.11017	9.07692
1	JL033021_040221_RPA2HFH_Q2_10to1_1ug.11855.11855.4	6.85e-11	K.DGETTDANGK[425.27]TIVTGGNGPEDFQQHEQIR.R	YPR187W	3410.61	126.127	135063	127.13	23228.2	146280	12765.9	0.0872705	11.4586
0.9908	JL033021_040221_RPA2HFH_Q2_10to1_1ug.11886.11886.5	0.361	R.NPDAPK[425.27]GSTDPK[425.27]ELYNNAHVYAR.D	YPR110C	3150.59	126.126	111103	127.13	19249.9	120330	10653.8	0.0885383	11.2945
1	JL033021_040221_RPA2HFH_Q2_10to1_1ug.11889.11889.3	2.81e-11	R.LPSK[425.27]LGEEVHENSQNQLLSK.V	YOR341W	2546.34	126.127	150522	127.13	27172.4	163012	15604.7	0.095727	10.4464
1	JL033021_040221_RPA2HFH_Q2_10to1_1ug.11892.11892.4	2.7e-14	R.LPSK[425.27]LGEEVHENSQNQLLSK.V	YOR341W	2546.34	126.127	158911	127.13	26760.1	172113	14409.8	0.0837227	11.9442
0.9999	JL033021_040221_RPA2HFH_Q2_10to1_1ug.11898.11898.3	0.000115	R.PK[425.27]TGSTYILSTEVK.N	YOR341W	1820	126.127	108362	127.131	19998.2	117350	11701.8	0.0997167	10.0284
0.9982	JL033021_040221_RPA2HFH_Q2_10to1_1ug.11939.11939.3	9.56e-09	R.SRNTASFAGSKK[407.26]TFD.-	YGR159C	1894.96	126.127	155621	127.13	30034.8	168519	18214.2	0.108084	9.25206
1	JL033021_040221_RPA2HFH_Q2_10to1_1ug.11951.11951.4	1.06e-06	R.K[425.27]ALANQLLTPSSNVSTHTLNK.K	YOR341W	2533.39	126.127	103185	127.13	20493	111732	12696.7	0.113635	8.80014
1	JL033021_040221_RPA2HFH_Q2_10to1_1ug.11973.11973.4	4.66e-07	R.K[425.27]ALANQLLTPSSNVSTHTLNK.K	YOR341W	2533.39	126.127	97816.5	127.13	20014.4	105914	12665.8	0.119585	8.36222
0.9967	JL033021_040221_RPA2HFH_Q2_10to1_1ug.11978.11978.3	0.0143	K.IPAIDYSK[425.27]VR.V	YJL148W	1457.83	126.127	236557	127.13	41594.4	256196	23335.5	0.0910845	10.9788
1	JL033021_040221_RPA2HFH_Q2_10to1_1ug.11986.11986.3	0.00504	R.DNIQGITK[425.27]PAIR.R	P62799_H4,YBR009C,YNL030W	1621.92	126.127	112784	127.13	18688.8	122157	9901.64	0.0810569	12.337
1	JL033021_040221_RPA2HFH_Q2_10to1_1ug.11998.11998.3	4.34e-05	R.EK[425.27]YSFLEGGSK.L	YGL009C	1540.79	126.127	85164.5	127.131	15620.8	92229.5	9093.48	0.0985962	10.1424
0.9864	JL033021_040221_RPA2HFH_Q2_10to1_1ug.12025.12025.5	8.55e-06	R.IVLVHLGK[425.27]DGSQDKFR.M	YPR010C	2108.18	126.127	237963	127.13	48129.6	257667	30212.3	0.117253	8.52854
1	JL033021_040221_RPA2HFH_Q2_10to1_1ug.12037.12037.5	1.8e-15	R.HIIPSK[425.27]ANVNETASHNEIFYAR.L	YOR123C	2807.44	126.127	91230	127.13	17448.7	98792.3	10507.7	0.106362	9.40189
1	JL033021_040221_RPA2HFH_Q2_10to1_1ug.12040.12040.4	1.18e-07	R.HIIPSK[425.27]ANVNETASHNEIFYAR.L	YOR123C	2807.44	126.127	199204	127.13	36195.7	215733	20903.5	0.0968952	10.3204
1	JL033021_040221_RPA2HFH_Q2_10to1_1ug.12059.12059.4	0.000104	K.DGETTDANGK[425.27]TIVTGGNGPEDFQQHEQIR.R	YPR187W	3410.61	126.127	80521	127.13	16929.6	87183	10912.9	0.125172	7.98899
1	JL033021_040221_RPA2HFH_Q2_10to1_1ug.12077.12077.3	0.000878	R.K[425.27]NILLGSTDSVR.N	YKL209C	1598.91	126.127	69015	127.13	12509.2	74741.6	7208.98	0.0964521	10.3678
0.9999	JL033021_040221_RPA2HFH_Q2_10to1_1ug.12086.12086.3	0.00115	R.EGLIDTAVK[407.26]TSR.S	YOR341W	1567.87	126.127	102233	127.131	19606.8	110707	11832.5	0.106882	9.35612
1	JL033021_040221_RPA2HFH_Q2_10to1_1ug.12100.12100.3	0.00522	K.K[425.27]ELQFIR.V	YNL248C	1229.72	126.127	156567	127.13	23213.5	169601	10819.7	0.0637949	15.6752
1	JL033021_040221_RPA2HFH_Q2_10to1_1ug.12110.12110.5	4.76e-08	R.NPDAPK[425.27]GSTDPK[425.27]ELYNNAHVYAR.D	YPR110C	3150.59	126.127	262646	127.13	58863	284347	39498	0.138908	7.19902
1	JL033021_040221_RPA2HFH_Q2_10to1_1ug.12111.12111.4	3.12e-10	R.K[425.27]ALANQLLTPSSNVSTHTLNK.K	YOR341W	2533.39	126.127	129398	127.131	25021.3	140122	15195.9	0.108447	9.22107
1	JL033021_040221_RPA2HFH_Q2_10to1_1ug.12112.12112.3	3.99e-10	R.K[425.27]ALANQLLTPSSNVSTHTLNK.K	YOR341W	2533.39	126.127	157384	127.131	28618.2	170443	16537.9	0.0970289	10.3062
1	JL033021_040221_RPA2HFH_Q2_10to1_1ug.12128.12128.4	1.2e-09	R.NPDAPK[425.27]GSTDPK[425.27]ELYNNAHVYAR.D	YPR110C	3150.59	126.127	212292	127.131	44553.7	229857	28684.9	0.124795	8.01317
1	JL033021_040221_RPA2HFH_Q2_10to1_1ug.12150.12150.5	1.6e-06	R.NPDAPK[425.27]GSTDPK[425.27]ELYNNAHVYAR.D	YPR110C	3150.59	126.127	355836	127.13	78666.7	385245	52353.4	0.135896	7.35854
0.9969	JL033021_040221_RPA2HFH_Q2_10to1_1ug.12154.12154.3	0.0298	R.NTASFAGSK[425.27]K[425.27]TFD.-	YGR159C	1967.02	126.127	179550	127.131	32175.7	194451	18360.2	0.0944208	10.5909
0.9979	JL033021_040221_RPA2HFH_Q2_10to1_1ug.12159.12159.4	0.229	R.K[425.27]ALANQLLTPSSNVSTHTLNK[425.27].K	YOR341W	2830.57	126.127	92424.7	127.13	17681.1	100086	10649.5	0.106403	9.39819
0.9999	JL033021_040221_RPA2HFH_Q2_10to1_1ug.12184.12184.4	0.0259	R.IINSSEIQSAIRPAGQATQK[425.27]R.T	YBR031W,YDR012W	2564.41	126.127	124818	127.13	22744.7	135174	13167.5	0.0974116	10.2657
0.9862	JL033021_040221_RPA2HFH_Q2_10to1_1ug.12186.12186.3	3.12e-07	K.APVLVSK[425.27]VVSK.S	YNL248C	1422.89	126.127	78839	127.13	14601.4	85378.1	8568.96	0.100365	9.96365
0.9958	JL033021_040221_RPA2HFH_Q2_10to1_1ug.12196.12196.3	2.07e-11	K.VTAVEKSTGK[407.26]SSNITISNAVGR.L	YDL229W,YNL209W	2497.36	126.127	136304	127.131	27073.3	147594	16774.9	0.113655	8.79854
0.9888	JL033021_040221_RPA2HFH_Q2_10to1_1ug.12197.12197.3	2.22e-08	K.ILDADPLSK[425.27]EDTSEK.L	YOR340C	1957	126.127	149260	127.13	25202.9	161660	13607.5	0.0841734	11.8802
1	JL033021_040221_RPA2HFH_Q2_10to1_1ug.12218.12218.3	3.18e-08	R.K[425.27]ALANQLLTPSSNVSTHTLNK.K	YOR341W	2533.39	126.127	104469	127.131	18756.7	113139	10720.9	0.0947584	10.5532
1	JL033021_040221_RPA2HFH_Q2_10to1_1ug.12253.12253.3	4.21e-05	R.VEK[425.27]IPGGDVLDSR.V	YJL014W	1680.91	126.127	84754.5	127.13	15269.2	91787.9	8753.55	0.0953672	10.4858
0.9994	JL033021_040221_RPA2HFH_Q2_10to1_1ug.12254.12254.3	0.122	K.AIYPK[425.27]SQFSNLK.V	YJR063W	1691.93	126.127	89530.2	127.13	13404	96982.3	6326.15	0.0652299	15.3304
0.9995	JL033021_040221_RPA2HFH_Q2_10to1_1ug.12256.12256.4	0.075	R.EGLIDTAVK[425.27]TSRSGYLQR.C	YOR341W	2290.24	126.127	105648	127.13	19560.3	114411	11476.2	0.100307	9.96937
1	JL033021_040221_RPA2HFH_Q2_10to1_1ug.12260.12260.5	7.79e-11	R.IPTHPETEQPK[425.27]GFGYVQFSNM[147.04]EDAKK.A	YGR159C	3290.6	126.127	116495	127.13	18232.9	126185	9079.93	0.071957	13.8972
1	JL033021_040221_RPA2HFH_Q2_10to1_1ug.12261.12261.4	8.5e-12	R.K[425.27]ALANQLLTPSSNVSTHTLNK.K	YOR341W	2533.39	126.127	98309.4	127.131	19602.2	106452	12179.8	0.114416	8.74002
1	JL033021_040221_RPA2HFH_Q2_10to1_1ug.12262.12262.3	9.95e-07	R.K[425.27]ALANQLLTPSSNVSTHTLNK.K	YOR341W	2533.39	126.127	102937	127.13	17353.5	111489	9354.79	0.0839079	11.9178
1	JL033021_040221_RPA2HFH_Q2_10to1_1ug.12277.12277.3	1.4e-05	R.VGK[425.27]NDVAVVLR.V	YJR007W	1465.87	126.127	71373.5	127.13	11829.3	77304.8	6268.7	0.0810907	12.3319
0.98	JL033021_040221_RPA2HFH_Q2_10to1_1ug.12286.12286.4	0.22	K.LYVPPADNK[425.27]HIELQTGPDGK.V	YJL130C	2488.3	126.127	83997.7	127.13	15755.4	90963	9342.44	0.102706	9.73653
0.9937	JL033021_040221_RPA2HFH_Q2_10to1_1ug.12292.12292.4	0.033	R.IPTHPETEQPK[425.27]GFGYVQFSNM[147.04]EDAKK.A	YGR159C	3290.6	126.127	79529.6	127.13	15451.6	86120	9418.01	0.109359	9.14419
1	JL033021_040221_RPA2HFH_Q2_10to1_1ug.12298.12298.3	1.26e-06	M.GEEHK[407.26]PLLDASGVDPR.E	YDL126C	1998.03	126.127	119709	127.13	22580.7	129635	13450.4	0.103756	9.63798
1	JL033021_040221_RPA2HFH_Q2_10to1_1ug.12313.12313.3	1.51e-12	R.LIGDAAK[425.27]NQAAM[147.04]NPSNTVFDAK.R	YAL005C	2588.3	126.127	102254	127.131	17370.1	110748	9433.88	0.0851829	11.7394
1	JL033021_040221_RPA2HFH_Q2_10to1_1ug.12321.12321.4	5.85e-05	R.K[425.27]HFNDFETPHPVVTIESK.K	YMR319C	2421.24	126.126	81471.8	127.13	14597.8	88233.3	8328.73	0.0943944	10.5938
0.9743	JL033021_040221_RPA2HFH_Q2_10to1_1ug.12334.12334.5	0.0222	R.KALANQLLTPSSNVSTHTLNK[425.27]K[425.27]VYR.H	YOR341W	3376.9	126.127	107323	127.13	19082.5	116231	10813.8	0.093037	10.7484
0.9992	JL033021_040221_RPA2HFH_Q2_10to1_1ug.12370.12370.4	0.0599	R.LIGDAAK[425.27]NQAAM[147.04]NPANTVFDAKR.L	YLL024C	2728.4	126.127	84605.9	127.13	15334.7	91626.1	8837.07	0.096447	10.3684
0.9978	JL033021_040221_RPA2HFH_Q2_10to1_1ug.12371.12371.5	5.6e-07	R.K[425.27]ALANQLLTPSSNVSTHTLNK[425.27]K.V	YOR341W	2958.67	126.127	111248	127.13	20852	120473	12357.6	0.102576	9.74891
0.9989	JL033021_040221_RPA2HFH_Q2_10to1_1ug.12384.12384.4	0.228	R.QIRPPIYSLK[425.27]QTR.L	YLR342W	1896.1	126.127	80921.9	127.13	15180.2	87632.2	9002.19	0.102727	9.73455
0.9978	JL033021_040221_RPA2HFH_Q2_10to1_1ug.12385.12385.5	4.31e-07	R.K[425.27]ALANQLLTPSSNVSTHTLNK[425.27]K.V	YOR341W	2958.67	126.127	108086	127.13	18434.4	117064	10050.7	0.0858566	11.6473
1	JL033021_040221_RPA2HFH_Q2_10to1_1ug.12401.12401.4	4.61e-08	R.K[425.27]EIELAEHEM[147.04]PGLM[147.04]AIR.K	YER043C	2295.17	126.127	83564.6	127.13	15633.3	90494.4	9250.54	0.102222	9.78262
1	JL033021_040221_RPA2HFH_Q2_10to1_1ug.12424.12424.4	0.00015	R.NM[147.04]SVIAHVDHGK[425.27]STLTDSLVQR.A	YDR385W,YOR133W	2720.4	126.127	83773.4	127.131	15877.5	90718.8	9493.46	0.104647	9.55592
0.9965	JL033021_040221_RPA2HFH_Q2_10to1_1ug.12449.12449.3	5.82e-05	R.APSDTTFDLYK[425.27]K.K	YNL248C	1681.86	126.127	78618.7	127.13	14940.8	85136.4	8952.5	0.105155	9.50979
1	JL033021_040221_RPA2HFH_Q2_10to1_1ug.12492.12492.5	0.000265	R.IEEELGDKAVYAGENFHHGDK[425.27]L.-	YHR174W	2767.35	126.127	60615.8	127.131	8941.32	65662.3	4139.71	0.0630454	15.8616
0.9998	JL033021_040221_RPA2HFH_Q2_10to1_1ug.12526.12526.3	0.0247	K.VPFK[425.27]LPEM[147.04]TR.R	YNL248C	1529.84	126.127	77823.5	127.131	13245.1	84288	7206.82	0.0855023	11.6956
0.9696	JL033021_040221_RPA2HFH_Q2_10to1_1ug.12552.12552.3	0.676	R.FM[147.04]PLTAVK[425.27]PR.C	YDR211W	1471.83	126.127	83104.1	127.131	14172.7	90007	7726.74	0.085846	11.6488
0.9875	JL033021_040221_RPA2HFH_Q2_10to1_1ug.12557.12557.3	0.643	K.LVTDYFNGK[425.27]EPNR.S	YAL005C,YLL024C	1848.95	126.127	102233	127.13	17940	110721	10046.4	0.0907365	11.0209
1	JL033021_040221_RPA2HFH_Q2_10to1_1ug.12602.12602.3	1.23e-07	R.ENVK[425.27]ILGTSPDM[147.04]IDSAENR.Y	YJL130C	2401.19	126.127	82536.5	127.13	16156.5	89375.1	9903.52	0.110809	9.02458
1	JL033021_040221_RPA2HFH_Q2_10to1_1ug.12613.12613.3	2.73e-05	R.VVDLVEHVAK[425.27]A.-	YGR192C,YJR009C	1475.84	126.127	97012.5	127.13	20012.2	105042	12735.6	0.121243	8.24792
0.9944	JL033021_040221_RPA2HFH_Q2_10to1_1ug.12650.12650.3	0.000242	Y.STRVVDLVEHVAK[425.27]A.-	YGR192C,YJR009C	1820.02	126.127	85455.2	127.131	15406.6	92546.5	8837.91	0.0954969	10.4715
1	JL033021_040221_RPA2HFH_Q2_10to1_1ug.12652.12652.4	0.000415	Q.RC[160.03]LTK[425.27]QLEGVHVSYDNSIR.D	YOR341W	2571.33	126.127	83371.6	127.13	12442	90311.4	5848.07	0.0647545	15.4429
0.9816	JL033021_040221_RPA2HFH_Q2_10to1_1ug.12656.12656.3	0.868	R.GYSFM[147.04]TAK[425.27]LPEAR.Q	YBL017C	1782.91	126.126	74102.2	127.13	15351.9	80235.1	9798.44	0.122122	8.18856
0.9972	JL033021_040221_RPA2HFH_Q2_10to1_1ug.12676.12676.3	0.0798	K.LK[425.27]APLVIR.D	DECOY_YNL288W_UNMAPPED	1205.79	126.127	137709	127.13	18622.8	149187	7593.36	0.0508981	19.6471
1	JL033021_040221_RPA2HFH_Q2_10to1_1ug.12681.12681.3	0.00309	R.M[147.04]FTK[425.27]PEYWDR.V	YLR418C	1684.8	126.126	63429.6	127.13	10468.5	68701.1	5523.56	0.0803999	12.4378
1	JL033021_040221_RPA2HFH_Q2_10to1_1ug.12690.12690.3	7.97e-06	R.ENVK[425.27]ILGTSPDM[147.04]IDSAENR.Y	YJL130C	2401.19	126.127	78367	127.13	14410.5	84867.8	8406.8	0.0990576	10.0951
1	JL033021_040221_RPA2HFH_Q2_10to1_1ug.12693.12693.3	4.62e-08	R.FITK[425.27]YNFDDESGK.W	YOR341W	1859.9	126.127	95194.4	127.13	17365.3	103092	10062.5	0.0976068	10.2452
0.9995	JL033021_040221_RPA2HFH_Q2_10to1_1ug.12709.12709.4	0.0365	K.LSVSVEQVSIAK[425.27]PM[147.04]SNDGVSSAVER.K	YPR010C	2901.48	126.127	57267.8	127.13	10629.5	62017.5	6249.29	0.100767	9.92393
0.9834	JL033021_040221_RPA2HFH_Q2_10to1_1ug.12747.12747.3	9.46e-07	K.KQK[407.26]NEETEEPATIFVGR.L	YGR159C	2254.17	126.127	113556	127.13	20801.3	122976	12096.1	0.0983608	10.1667
0.9574	JL033021_040221_RPA2HFH_Q2_10to1_1ug.12761.12761.5	0.00431	K.LSVSVEQVSIAK[425.27]PM[147.04]SNDGVSSAVERKVYPSESR.Q	YPR010C	3847.97	126.127	246486	127.13	50586.6	266890	32079.9	0.120199	8.31954
1	JL033021_040221_RPA2HFH_Q2_10to1_1ug.12763.12763.4	1.56e-05	R.DLEAHPAEESQAQPPAYDEDDEAGADVPLM[147.04]DNK[425.27]QQLSSGR.T	YJL151C	4636.09	126.127	21932.8	127.13	3806.21	23754.1	2109.7	0.0888143	11.2594
0.9906	JL033021_040221_RPA2HFH_Q2_10to1_1ug.12767.12767.5	0.00085	K.LSVSVEQVSIAK[407.26]PM[147.04]SNDGVSSAVERK[407.26]VYPSESR.Q	YPR010C	4109.13	126.127	66443.8	127.13	13636	71943.8	8647.29	0.120195	8.31981
1	JL033021_040221_RPA2HFH_Q2_10to1_1ug.12768.12768.4	1.81e-09	R.C[160.03]LTK[425.27]QLEGVHVSYDNSIR.D	YOR341W	2415.23	126.127	62929.4	127.131	10471.9	68158.7	5572.12	0.0817522	12.2321
1	JL033021_040221_RPA2HFH_Q2_10to1_1ug.12784.12784.4	4.02e-08	R.C[160.03]LTK[425.27]QLEGVHVSYDNSIR.D	YOR341W	2415.23	126.127	86043.2	127.13	15066.2	93187.1	8420.33	0.0903594	11.0669
1	JL033021_040221_RPA2HFH_Q2_10to1_1ug.12790.12790.3	3.27e-07	R.C[160.03]LTK[425.27]QLEGVHVSYDNSIR.D	YOR341W	2415.23	126.127	131290	127.13	22163.5	142198	11963.6	0.0841339	11.8858
1	JL033021_040221_RPA2HFH_Q2_10to1_1ug.12830.12830.3	4.14e-06	K.IFETALNEK[425.27]QITNNR.V	YOR341W	2087.11	126.127	163614	127.131	27001.3	177212	14246	0.0803896	12.4394
0.9743	JL033021_040221_RPA2HFH_Q2_10to1_1ug.12840.12840.4	0.000533	E.DEISNSGYLGNK[425.27]LSVSVEQVSIAKPM[147.04]SNDGVSSAVER.K	YPR010C	4179.07	126.126	42602.5	127.13	9366.2	46124	6212.1	0.134683	7.42485
0.996	JL033021_040221_RPA2HFH_Q2_10to1_1ug.12858.12858.3	0.113	K.NTISEAGDK[425.27]LEQADKDAVTK.K	YLL024C	2429.24	126.126	105776	127.13	19507.1	114550	11407.6	0.0995857	10.0416
1	JL033021_040221_RPA2HFH_Q2_10to1_1ug.12880.12880.4	0.0121	K.KNLTHTSVNSSPTLLQNALAK[407.26].V	DECOY_YOR341W_UNMAPPED	2515.38	126.127	73508.6	127.13	11627	79622	5860.15	0.0735996	13.587
0.9934	JL033021_040221_RPA2HFH_Q2_10to1_1ug.12911.12911.3	0.0271	K.NTISEAGDK[425.27]LEQADKDAVTK.K	YLL024C	2429.24	126.126	127938	127.13	24071.6	138546	14309.4	0.103283	9.68217
1	JL033021_040221_RPA2HFH_Q2_10to1_1ug.12916.12916.3	2.64e-06	R.SK[425.27]FSPLNNAVVAR.F	YDR264C	1698.95	126.127	79718.5	127.13	14276.7	86334.6	8142.08	0.0943084	10.6035
1	JL033021_040221_RPA2HFH_Q2_10to1_1ug.12924.12924.3	1.58e-05	K.SLDTFIK[425.27]QTDSR.L	YGL009C	1706.89	126.127	135663	127.13	22011.6	146941	11408.3	0.0776388	12.8802
0.9698	JL033021_040221_RPA2HFH_Q2_10to1_1ug.12928.12928.3	0.154	R.FTVDK[407.26]KIAER.S	YDR328C	1484.84	126.127	75004.9	127.13	12216.3	81239.8	6357.39	0.0782545	12.7788
1	JL033021_040221_RPA2HFH_Q2_10to1_1ug.12944.12944.3	0.000437	K.ELIK[425.27]NYITAR.L	YKL182W	1516.87	126.127	52991.2	127.13	9787.07	57386.6	5730.48	0.0998574	10.0143
0.9982	JL033021_040221_RPA2HFH_Q2_10to1_1ug.12956.12956.3	4.23e-15	R.EAAAEVTNLDK[425.27]DTPADDPELLKR.L	YOR341W	2807.43	126.127	119389	127.131	22464.6	129289	13354.8	0.103294	9.68108
1	JL033021_040221_RPA2HFH_Q2_10to1_1ug.12959.12959.3	1.29e-09	K.K[425.27]IENTM[147.04]LENITLR.G	RPB1-msCTD,YDL140C	1887.02	126.127	114880	127.131	21758.8	124404	13003.2	0.104524	9.56722
1	JL033021_040221_RPA2HFH_Q2_10to1_1ug.12972.12972.5	5.33e-09	R.EAAAEVTNLDK[425.27]DTPADDPELLKR.L	YOR341W	2807.43	126.127	56162.8	127.13	9533.77	60828.3	5174.31	0.0850643	11.7558
1	JL033021_040221_RPA2HFH_Q2_10to1_1ug.12998.12998.5	6.15e-05	R.EAAAEVTNLDK[425.27]DTPADDPELLKR.L	YOR341W	2807.43	126.127	56976.4	127.13	13113.7	61681.1	8937.45	0.144898	6.90142
1	JL033021_040221_RPA2HFH_Q2_10to1_1ug.13029.13029.3	6.43e-08	R.SK[425.27]ALDISM[147.04]DLATSR.N	YDR238C	1819.94	126.127	87774.7	127.13	16973.2	95049.1	10308.4	0.108453	9.22055
1	JL033021_040221_RPA2HFH_Q2_10to1_1ug.13064.13064.4	0.00204	R.SLGHWVDSNGEPIDGK[425.27]LR.F	YOR340C	2276.16	126.127	60189.1	127.13	11718.5	65176.7	7153.94	0.109762	9.11059
0.9886	JL033021_040221_RPA2HFH_Q2_10to1_1ug.13078.13078.5	2.79e-08	R.IPTHPETEQPK[425.27]GFGYVQFSNM[147.04]EDAK[425.27]K.A	YGR159C	3587.78	126.127	103716	127.13	16027.6	112345	7863.98	0.0699983	14.2861
1	JL033021_040221_RPA2HFH_Q2_10to1_1ug.13091.13091.4	0.000247	K.TLPSFKPYETDAM[147.04]AGGYVK[425.27]GR.F	YOR341W	2600.3	126.127	131729	127.13	23178.6	142665	13012.1	0.0912069	10.9641
0.9961	JL033021_040221_RPA2HFH_Q2_10to1_1ug.13158.13158.3	0.408	R.FFK[425.27]QDFEENGSLER.T	YBR127C	2041.98	126.127	118164	127.13	21741.1	127966	12689.4	0.0991624	10.0845
0.9997	JL033021_040221_RPA2HFH_Q2_10to1_1ug.13165.13165.3	0.0671	R.FFK[425.27]QDFEENGSLER.T	YBR127C	2041.98	126.127	121462	127.13	21555.5	131544	12194.5	0.0927033	10.7871
1	JL033021_040221_RPA2HFH_Q2_10to1_1ug.13172.13172.4	8.73e-15	R.IPTHPETEQPK[425.27]GFGYVQFSNM[147.04]EDAK.K	YGR159C	3162.5	126.127	101890	127.13	16999.7	110357	9069.6	0.0821843	12.1678
1	JL033021_040221_RPA2HFH_Q2_10to1_1ug.13192.13192.3	0.000574	R.LDSYK[425.27]VIEQPITSETAM[147.04]K.K	YOL127W	2365.22	126.127	102573	127.13	17858.4	111090	9928.43	0.0893727	11.1891
1	JL033021_040221_RPA2HFH_Q2_10to1_1ug.13203.13203.3	0.000862	R.GFAFSQAEEGGQEK[425.27]IVR.M	YAL026C	2149.09	126.127	113779	127.13	20216.4	123223	11449.3	0.092915	10.7625
0.9997	JL033021_040221_RPA2HFH_Q2_10to1_1ug.13214.13214.3	1.94e-17	R.LIGDAAK[425.27]NQAAM[147.04]NPANTVFDAK.R	YLL024C	2572.3	126.127	112190	127.131	21350.9	121491	12807.6	0.105421	9.48581
0.9998	JL033021_040221_RPA2HFH_Q2_10to1_1ug.13231.13231.3	0.00119	A.AEVTNLDK[425.27]DTPADDPELLKR.L	YOR341W	2536.31	126.128	64483.6	127.131	13644.7	69818	8832.55	0.126508	7.90462
0.9921	JL033021_040221_RPA2HFH_Q2_10to1_1ug.13240.13240.3	1.65e-07	-.M[147.04]QIFVK[425.27]TLTGK.T	YIL148W,YKR094C,YLL039C,YLR167W	1577.89	126.127	114249	127.13	19890.2	123736	11057.5	0.0893637	11.1902
0.9742	JL033021_040221_RPA2HFH_Q2_10to1_1ug.13256.13256.3	6.24e-09	R.EAAAEVTNLDKDTPADDPELLK[425.27]R.L	YOR341W	2807.43	126.126	83752.7	127.13	14493.8	90707.8	8012.53	0.0883334	11.3208
0.9916	JL033021_040221_RPA2HFH_Q2_10to1_1ug.13263.13263.5	0.453	R.K[425.27]ALANQLLTPSSNVSTHTLNK[425.27]K[425.27]VYR.H	YOR341W	3674.08	126.127	92767.4	127.13	17150	100462	10049.6	0.100034	9.99662
0.9755	JL033021_040221_RPA2HFH_Q2_10to1_1ug.13264.13264.4	0.862	R.YEEFADK[425.27]VK[425.27]LGR.V	YPR110C	2048.11	126.127	130522	127.131	28203.7	141314	18505.2	0.130951	7.63645
0.999	JL033021_040221_RPA2HFH_Q2_10to1_1ug.13277.13277.6	0.00133	R.K[425.27]ALANQLLTPSSNVSTHTLNK[425.27]K[425.27]VYR.H	YOR341W	3674.08	126.127	113831	127.13	21476.4	123269	12794.8	0.103795	9.63436
1	JL033021_040221_RPA2HFH_Q2_10to1_1ug.13280.13280.4	8.2e-09	R.FYSGIK[425.27]PQEYYFHC[160.03]M[147.04]AGR.E	YOR341W	2566.19	126.127	119365	127.13	17857.3	129301	8419.77	0.0651177	15.3568
0.9781	JL033021_040221_RPA2HFH_Q2_10to1_1ug.13284.13284.5	4.25e-08	R.EAAAEVTNLDKDTPADDPELLK[425.27]R.L	YOR341W	2807.43	126.127	91106.4	127.13	16970.3	98662.3	10006.2	0.101419	9.86009
1	JL033021_040221_RPA2HFH_Q2_10to1_1ug.13298.13298.3	0.00472	R.GLSGEYK[425.27]FLR.Y	YAR010C,YBR012W-A,YBR012W-B,YDR098C-A,YDR098C-B,YDR170W-A,YDR210C-C,YDR210C-D,YDR261C-C,YDR261C-D,YDR316W-A,YDR316W-B,YDR365W-A,YDR365W-B,YER137C-A,YER138C,YER159C-A,YER160C,YGR027W-A,YGR027W-B,YGR038C-A,YGR038C-B,YGR161C-C,YGR161C-D,YHR214C-B,YHR214C-C,YJR026W,YJR027W,YJR028W,YJR029W,YLR157C-A,YLR157C-B,YLR227W-A,YLR227W-B,YLR256W-A,YML039W,YML040W,YML045W,YML045W-A,YMR045C,YMR046C,YMR050C,YMR05…	1465.8	126.127	160853	127.13	27849.3	174211	15402.5	0.0884128	11.3106
1	JL033021_040221_RPA2HFH_Q2_10to1_1ug.13330.13330.4	2.88e-11	R.SLGHWVDSNGEPIDGK[425.27]LR.F	YOR340C	2276.16	126.127	101646	127.131	18376.6	110080	10567	0.095994	10.4173
1	JL033021_040221_RPA2HFH_Q2_10to1_1ug.13338.13338.4	4.66e-11	R.SLGHWVDSNGEPIDGK[425.27]LR.F	YOR340C	2276.16	126.127	135652	127.13	22348.5	146926	11770.4	0.0801112	12.4826
1	JL033021_040221_RPA2HFH_Q2_10to1_1ug.13345.13345.3	0.00054	R.SLGHWVDSNGEPIDGK[425.27]LR.F	YOR340C	2276.16	126.127	135855	127.131	22187.5	147148	11579.6	0.0786936	12.7075
1	JL033021_040221_RPA2HFH_Q2_10to1_1ug.13346.13346.3	4.13e-07	R.DNNK[425.27]SGILDAVTSSK.V	YOR341W	1844.96	126.127	83299.6	127.13	16573.3	90199.3	10281.6	0.113988	8.77288
1	JL033021_040221_RPA2HFH_Q2_10to1_1ug.13349.13349.3	2.45e-05	R.VK[425.27]VIPYSTFR.L	RPB1-msCTD,YDL140C	1505.87	126.127	58727.6	127.13	12866.3	63582.2	8515.16	0.133924	7.46694
0.9529	JL033021_040221_RPA2HFH_Q2_10to1_1ug.13384.13384.3	0.0995	K.QALEK[407.26]KEGLFR.K	YOR341W	1596.91	126.127	73010.8	127.13	14994	79054.4	9512.9	0.120334	8.31023
0.9929	JL033021_040221_RPA2HFH_Q2_10to1_1ug.13387.13387.3	0.0429	R.LVNHFIQEFK[425.27]R.K	YAL005C,YLL024C	1726.96	126.127	144480	127.13	24856.2	156479	13665.1	0.0873284	11.451
1	JL033021_040221_RPA2HFH_Q2_10to1_1ug.13389.13389.4	0.00652	R.LVNHFIQEFK[425.27]R.K	YAL005C,YLL024C	1726.96	126.127	149331	127.131	24096.9	161746	12415.9	0.0767618	13.0273
0.9542	JL033021_040221_RPA2HFH_Q2_10to1_1ug.13402.13402.3	0.00048	R.NTASFAGSKK[407.26]TFD.-	YGR159C	1651.83	126.127	76399.9	127.13	14262.4	82735.8	8424.71	0.101827	9.82061
1	JL033021_040221_RPA2HFH_Q2_10to1_1ug.13405.13405.4	6.9e-10	R.VFGALK[425.27]GASDGGLYVPHSENR.F	YPL131W	2470.27	126.127	80207.2	127.13	13646.5	86869.7	7422.86	0.0854482	11.703
1	JL033021_040221_RPA2HFH_Q2_10to1_1ug.13417.13417.4	1.46e-13	R.VFGALK[425.27]GASDGGLYVPHSENR.F	YPL131W	2470.27	126.127	108648	127.13	22018.9	117644	13841.5	0.117656	8.49938
0.9993	JL033021_040221_RPA2HFH_Q2_10to1_1ug.13460.13460.3	0.117	R.EVLRYEEFADK[425.27]VK.L	YPR110C	1922.02	126.128	95183.3	127.131	16639.5	103086	9285.67	0.0900767	11.1016
1	JL033021_040221_RPA2HFH_Q2_10to1_1ug.13481.13481.3	1.64e-06	R.ITM[147.04]AALNPEAIDEENK[425.27]PSTLR.L	YML074C	2625.34	126.127	105086	127.13	20469.5	113794	12500.8	0.109855	9.10295
1	JL033021_040221_RPA2HFH_Q2_10to1_1ug.13491.13491.3	4.75e-05	R.IADSGLGWK[425.27]ISTSGGSAANQAR.K	YML069W	2443.25	126.127	95861.5	127.13	17647.9	103813	10305.4	0.0992682	10.0737
1	JL033021_040221_RPA2HFH_Q2_10to1_1ug.13496.13496.3	0.00122	R.K[425.27]ALANQLLTPSSNVSTHTLN.K	YOR341W	2405.3	126.126	86016.8	127.13	16082	93150.1	9511.17	0.102106	9.79376
1	JL033021_040221_RPA2HFH_Q2_10to1_1ug.13510.13510.3	4.22e-08	R.DNNK[425.27]SGILDAVTSSK.V	YOR341W	1844.96	126.127	79917.1	127.13	15413.1	86540.6	9342.06	0.10795	9.26354
1	JL033021_040221_RPA2HFH_Q2_10to1_1ug.13603.13603.3	0.00024	R.LIFAGK[425.27]QLEDGR.T	YIL148W,YKR094C,YLL039C,YLR167W	1642.91	126.127	112976	127.13	20743.2	122348	12085.9	0.098783	10.1232
1	JL033021_040221_RPA2HFH_Q2_10to1_1ug.13606.13606.3	1.73e-05	K.DM[147.04]LDENTK[425.27]YFIQPSGR.F	YDR502C,YLR180W	2226.07	126.127	151766	127.131	28970.8	164347	17420.1	0.105996	9.43431
1	JL033021_040221_RPA2HFH_Q2_10to1_1ug.13619.13619.3	0.00566	K.TK[425.27]EVM[147.04]DFVNTPLTDK.T	YGL244W	2050.04	126.127	117950	127.13	21926.3	127733	12907.1	0.101047	9.89634
0.9932	JL033021_040221_RPA2HFH_Q2_10to1_1ug.13668.13668.4	0.0776	R.SLGHWVDSNGEPIDGK[425.27]LR.F	YOR340C	2276.16	126.128	86094.8	127.131	15260.1	93241.4	8623.45	0.0924852	10.8125
0.9987	JL033021_040221_RPA2HFH_Q2_10to1_1ug.13672.13672.6	0.00439	R.SLHK[425.27]EHLTEGGNM[147.04]AFHNHLNDFAHIEDPLER.R	YML123C	3920.87	126.127	106548	127.13	17188	115406	8853.22	0.0767138	13.0355
1	JL033021_040221_RPA2HFH_Q2_10to1_1ug.13680.13680.4	4.95e-06	K.GGISAVTGM[147.04]AEPEYGK[425.27]DYIHSVADR.V	YDR346C	2935.41	126.127	110495	127.13	19057.1	119671	10501.8	0.0877555	11.3953
0.9884	JL033021_040221_RPA2HFH_Q2_10to1_1ug.13683.13683.6	0.00123	R.SLHK[425.27]EHLTEGGNM[147.04]AFHNHLNDFAHIEDPLER.R	YML123C	3920.87	126.127	104099	127.13	18851.8	112736	10856	0.0962955	10.3847
1	JL033021_040221_RPA2HFH_Q2_10to1_1ug.13685.13685.3	0.00108	R.FTVIK[425.27]PGQFGR.S	YNL248C	1545.87	126.127	90033.8	127.13	16423.9	97503.5	9516.93	0.097606	10.2453
1	JL033021_040221_RPA2HFH_Q2_10to1_1ug.13709.13709.4	0.00018	R.FRLPSK[425.27]LGEEVHENSQNQLLSK.V	YOR341W	2849.51	126.127	97369.3	127.13	17008.5	105454	9484.86	0.0899432	11.1181
1	JL033021_040221_RPA2HFH_Q2_10to1_1ug.13781.13781.3	0.00214	R.LIFAGK[425.27]QLEDGR.T	YIL148W,YKR094C,YLL039C,YLR167W	1642.91	126.127	71131	127.13	11885.4	77041.4	6350.51	0.0824298	12.1315
1	JL033021_040221_RPA2HFH_Q2_10to1_1ug.13784.13784.3	0.000818	R.EVDPNISESNILPSKK[407.26]R.S	YAR009C,YBL005W-B,YBR012W-B,YDR098C-B,YDR210C-D,YDR261C-D,YDR316W-B,YDR365W-B,YER138C,YER160C,YGR027W-B,YGR038C-B,YGR161C-D,YHR214C-B,YJR027W,YJR029W,YLR035C-A,YLR157C-B,YLR227W-B,YML039W,YML045W,YMR045C,YMR050C,YOL103W-B,YOR142W-B,YPL257W-B,YPR137C-B,YPR158C-D,YPR158W-B	2204.19	126.128	201470	127.131	38157.5	218174	22802.3	0.104514	9.56805
0.9547	JL033021_040221_RPA2HFH_Q2_10to1_1ug.13793.13793.5	0.0369	R.KQTGNK[407.26]EVDPQSARRQR.G	YBR214W	2276.22	126.127	16331.5	127.131	2405.09	17691.2	1111.12	0.0628064	15.9219
1	JL033021_040221_RPA2HFH_Q2_10to1_1ug.13810.13810.3	0.00313	R.SIAVHPTK[425.27]PYVLSGSDDLTVK.L	YGL137W	2523.37	126.127	116244	127.13	22040.8	125882	13183	0.104725	9.54881
1	JL033021_040221_RPA2HFH_Q2_10to1_1ug.13820.13820.4	0.000546	R.SLGHWVDSNGEPIDGK[425.27]LR.F	YOR340C	2276.16	126.127	171767	127.13	29775.5	186031	16486.9	0.0886245	11.2836
1	JL033021_040221_RPA2HFH_Q2_10to1_1ug.13846.13846.3	0.0376	R.FTVIK[425.27]PGQFGR.S	YNL248C	1545.87	126.126	54029	127.13	11469.4	58498.3	7440.11	0.127185	7.86255
0.9998	JL033021_040221_RPA2HFH_Q2_10to1_1ug.13870.13870.5	1.93e-07	F.RK[425.27]EQC[160.03]VLQYVFHSRPNLSR.K	YOR341W	2713.43	126.127	57110.7	127.131	7107.3	61876.2	2489.06	0.0402264	24.8593
1	JL033021_040221_RPA2HFH_Q2_10to1_1ug.13917.13917.5	7.46e-06	R.FRLPSK[425.27]LGEEVHENSQNQLLSK.V	YOR341W	2849.51	126.127	70620	127.131	13480.7	76474.1	8105.91	0.105995	9.43437
1	JL033021_040221_RPA2HFH_Q2_10to1_1ug.13928.13928.3	0.000923	E.K[425.27]VIFDGK[425.27]PLNSEDEISNSGYLGNK.L	YPR010C	3217.67	126.127	33096.9	127.131	6351.26	35840.3	3834.69	0.106994	9.34633
0.9995	JL033021_040221_RPA2HFH_Q2_10to1_1ug.13939.13939.3	9.84e-05	E.K[407.26]VIFDGK[407.26]PLNSEDEISNSGYLGNK.L	YPR010C	3181.65	126.127	35452.6	127.13	5175.31	38404.7	2363.09	0.0615313	16.2519
0.9861	JL033021_040221_RPA2HFH_Q2_10to1_1ug.13965.13965.4	0.0258	K.TK[425.27]EVM[147.04]DFVNTPLTDKTTDEVVR.H	YGL244W	2850.44	126.127	88349.1	127.13	16696.4	95674.3	9960.25	0.104106	9.60561
0.9994	JL033021_040221_RPA2HFH_Q2_10to1_1ug.13970.13970.3	0.0296	R.IPNVPVIVK[425.27]AR.F	YGL103W	1501.94	126.127	69852	127.131	12749.4	75647.2	7391.24	0.0977067	10.2347
1	JL033021_040221_RPA2HFH_Q2_10to1_1ug.13977.13977.4	1.39e-07	R.LVK[425.27]ALEDIM[147.04]VHYDNTTR.N	RPB1-msCTD,YDL140C	2330.2	126.127	46659.2	127.13	12922.2	50494	9658.49	0.19128	5.22793
1	JL033021_040221_RPA2HFH_Q2_10to1_1ug.13987.13987.4	0.000718	K.SQYGASK[425.27]YGIVHSLHEVYGPEVAAK.V	YOR341W	2986.53	126.127	86083.5	127.13	17776	93208.5	11320.5	0.121453	8.23363
1	JL033021_040221_RPA2HFH_Q2_10to1_1ug.14000.14000.4	7.5e-07	R.LVK[425.27]ALEDIM[147.04]VHYDNTTR.N	RPB1-msCTD,YDL140C	2330.2	126.127	44756.9	127.13	11839.9	48439.9	8669.44	0.178973	5.58743
1	JL033021_040221_RPA2HFH_Q2_10to1_1ug.14007.14007.5	1.4e-08	K.SQYGASK[425.27]YGIVHSLHEVYGPEVAAK.V	YOR341W	2986.53	126.127	65617.4	127.13	11834.8	71062.5	6791.34	0.0955684	10.4637
1	JL033021_040221_RPA2HFH_Q2_10to1_1ug.14018.14018.4	1.2e-10	K.SQYGASK[425.27]YGIVHSLHEVYGPEVAAK.V	YOR341W	2986.53	126.127	101145	127.131	17481.8	109545	9653.09	0.0881202	11.3481
0.9981	JL033021_040221_RPA2HFH_Q2_10to1_1ug.14021.14021.5	4.14e-06	F.RK[425.27]EQC[160.03]VLQYVFHSRPNLSR.K	YOR341W	2713.43	126.127	74883.8	127.13	10805.7	81120.1	4856.66	0.05987	16.7029
1	JL033021_040221_RPA2HFH_Q2_10to1_1ug.14027.14027.3	3.47e-08	R.QATK[425.27]DAGAISGLNVLR.L	YDL229W,YNL209W	1910.07	126.127	106275	127.13	19343.8	115093	11187.8	0.0972068	10.2873
0.9888	JL033021_040221_RPA2HFH_Q2_10to1_1ug.14050.14050.5	5.2e-11	R.RVPVM[147.04]VSGK[425.27]TLPSFKPYETDAM[147.04]AGGYVK.G	YOR341W	3356.72	126.127	83673.9	127.13	14986.3	90618.3	8547.37	0.0943228	10.6019
0.9986	JL033021_040221_RPA2HFH_Q2_10to1_1ug.14051.14051.3	6.63e-12	K.FK[425.27]KDFEVNISSLDAR.E	YPR110C	2065.09	126.127	104855	127.13	20626.7	113542	12690.1	0.111766	8.94723
1	JL033021_040221_RPA2HFH_Q2_10to1_1ug.14067.14067.5	0.000177	K.SQYGASK[425.27]YGIVHSLHEVYGPEVAAK.V	YOR341W	2986.53	126.127	57282.7	127.131	10848.2	62032	6482.28	0.104499	9.56946
1	JL033021_040221_RPA2HFH_Q2_10to1_1ug.14086.14086.3	7.13e-06	R.SK[425.27]LNDLLEQR.Q	YMR054W	1511.84	126.127	55783.2	127.13	10046.6	60412.3	5757.92	0.0953104	10.492
0.9954	JL033021_040221_RPA2HFH_Q2_10to1_1ug.14089.14089.3	1.16e-10	R.EAAAEVTNLDK[425.27]DTPADDPELLK.R	YOR341W	2651.33	126.127	125574	127.131	21758.8	136002	12043.2	0.0885517	11.2928
1	JL033021_040221_RPA2HFH_Q2_10to1_1ug.14095.14095.3	9.82e-06	K.SK[425.27]LGANAILGVSM[147.04]AAAR.A	YHR174W	1942.08	126.127	103117	127.13	18434.2	111675	10496.7	0.0939934	10.639
0.9977	JL033021_040221_RPA2HFH_Q2_10to1_1ug.14099.14099.3	3.66e-10	R.EAAAEVTNLDK[425.27]DTPADDPELLK.R	YOR341W	2651.33	126.128	157649	127.131	25850.7	170753	13548.6	0.0793461	12.603
1	JL033021_040221_RPA2HFH_Q2_10to1_1ug.14110.14110.3	5.92e-06	R.C[160.03]LTK[425.27]QLEGVHVSYDNSIR.D	YOR341W	2415.23	126.127	112203	127.13	17821.6	121534	9024.55	0.0742555	13.467
1	JL033021_040221_RPA2HFH_Q2_10to1_1ug.14129.14129.3	0.00422	R.LASFK[425.27]NYLTR.S	YMR319C	1508.84	126.127	94718.8	127.13	15993.6	102588	8635.29	0.0841746	11.8801
0.9998	JL033021_040221_RPA2HFH_Q2_10to1_1ug.14152.14152.3	0.0127	R.EAAAEVTNLDK[425.27]DTPADDPELLK[425.27]R.L	YOR341W	3104.6	126.127	113558	127.13	24029.9	122952	15555.6	0.126517	7.90407
1	JL033021_040221_RPA2HFH_Q2_10to1_1ug.14168.14168.4	4.05e-10	R.EAAAEVTNLDK[425.27]DTPADDPELLK[425.27]R.L	YOR341W	3104.6	126.127	291256	127.13	69973.6	315281	48835.6	0.154895	6.45597
1	JL033021_040221_RPA2HFH_Q2_10to1_1ug.14182.14182.3	0.000502	K.GWK[425.27]IGDYAGIK.W	YMR303C,YOL086C	1503.82	126.127	52338	127.131	9406.89	56681.4	5381.72	0.0949468	10.5322
1	JL033021_040221_RPA2HFH_Q2_10to1_1ug.14189.14189.3	4.01e-14	K.LSVSVEQVSIAK[425.27]PM[147.04]SNDGVSSAVER.K	YPR010C	2901.48	126.127	226169	127.131	47378.7	244883	30466.3	0.124411	8.03785
0.9967	JL033021_040221_RPA2HFH_Q2_10to1_1ug.14197.14197.3	9.43e-14	R.DAK[425.27]LDKSQVDEIVLVGGSTR.L	YAL005C,YLL024C	2426.31	126.127	131254	127.13	22836	142152	12687.6	0.0892536	11.204
1	JL033021_040221_RPA2HFH_Q2_10to1_1ug.14212.14212.4	3.68e-11	K.LSVSVEQVSIAK[425.27]PM[147.04]SNDGVSSAVER.K	YPR010C	2901.48	126.127	104539	127.131	20321.2	113202	12391.1	0.10946	9.13576
1	JL033021_040221_RPA2HFH_Q2_10to1_1ug.14238.14238.3	0.000139	R.LAK[425.27]LNQLLR.L	YGR254W,YHR174W	1364.86	126.127	174022	127.13	31571.8	188461	18209.3	0.0966208	10.3497
0.9873	JL033021_040221_RPA2HFH_Q2_10to1_1ug.14254.14254.5	0.00322	R.VK[425.27]ADEVDYFHEEDRFFEK.Y	YDR361C	2599.23	126.127	42074	127.13	7790.94	45563.7	4571.53	0.100333	9.96685
1	JL033021_040221_RPA2HFH_Q2_10to1_1ug.14316.14316.3	0.00103	K.LSVSVEQVSIAK[407.26]PM[147.04]SNDGVSSAVER.K	YPR010C	2883.47	126.127	68089.3	127.13	12105.5	73741	6859.45	0.0930208	10.7503
1	JL033021_040221_RPA2HFH_Q2_10to1_1ug.14322.14322.3	0.000618	K.TLPSFK[425.27]PYETDAM[147.04]AGGYVK.G	YOR341W	2387.18	126.127	115730	127.131	22717	125318	13953.7	0.111346	8.98098
1	JL033021_040221_RPA2HFH_Q2_10to1_1ug.14336.14336.4	1.02e-05	R.K[425.27]EQC[160.03]VLQYVFHSRPNLSR.K	YOR341W	2557.33	126.127	57750.7	127.13	9962.04	62546.8	5490.69	0.0877853	11.3914
1	JL033021_040221_RPA2HFH_Q2_10to1_1ug.14343.14343.3	2.69e-12	K.LSVSVEQVSIAK[425.27]PM[147.04]SNDGVSSAVER.K	YPR010C	2901.48	126.127	81755.9	127.13	16113.5	88529	9927.53	0.112139	8.91753
1	JL033021_040221_RPA2HFH_Q2_10to1_1ug.14373.14373.3	4.55e-05	R.VVGVIVEPVSIK[425.27]R.S	YLR083C	1691.04	126.127	101574	127.131	18180.2	110005	10362.9	0.0942045	10.6152
0.9959	JL033021_040221_RPA2HFH_Q2_10to1_1ug.14386.14386.3	4.64e-09	R.QATK[425.27]DAGTIAGLNVLR.L	YAL005C,YER103W,YJL034W,YLL024C	1924.08	126.127	206154	127.13	33444.7	223293	17331.6	0.0776185	12.8835
0.9999	JL033021_040221_RPA2HFH_Q2_10to1_1ug.14432.14432.5	0.000247	R.K[425.27]EQC[160.03]VLQYVFHSRPNLSR.K	YOR341W	2557.33	126.127	52009.2	127.131	10971.4	56311.9	7087.76	0.125866	7.94495
1	JL033021_040221_RPA2HFH_Q2_10to1_1ug.14453.14453.3	0.000477	R.EK[425.27]ELLVAQFR.R	YGL244W	1528.87	126.127	45248.1	127.13	8117.68	49003.3	4636.7	0.0946202	10.5686
1	JL033021_040221_RPA2HFH_Q2_10to1_1ug.14456.14456.3	5.36e-06	R.EAAAEYAQLLAK[425.27]R.L	YBR181C,YPL090C	1729.94	126.127	92771.8	127.13	16863.1	100469	9741.79	0.096963	10.3132
0.9999	JL033021_040221_RPA2HFH_Q2_10to1_1ug.14459.14459.3	0.00184	L.NNLK[425.27]QENAYLLIR.R	YOR224C	1885.05	126.127	56491.6	127.13	11066.3	61172.2	6786.99	0.110949	9.01316
1	JL033021_040221_RPA2HFH_Q2_10to1_1ug.14473.14473.3	2.64e-07	R.LGEHNIDVLEGNEQFINAAK[407.26]II.T	TRYP_PIG	2715.43	126.127	49424.7	127.131	9604.44	53520.4	5854.95	0.109397	9.14104
0.9984	JL033021_040221_RPA2HFH_Q2_10to1_1ug.14478.14478.3	8.34e-05	R.LGEHNIDVLEGNEQFINAAK[425.27]II.T	TRYP_PIG	2733.44	126.127	45121.7	127.13	8217.61	48865.4	4755.13	0.0973108	10.2763
1	JL033021_040221_RPA2HFH_Q2_10to1_1ug.14489.14489.3	5.31e-07	R.LGEHNIDVLEGNEQFINAAK[425.27]II.T	TRYP_PIG	2733.44	126.127	46628.6	127.131	6802.69	50511.3	3103.65	0.0614448	16.2748
1	JL033021_040221_RPA2HFH_Q2_10to1_1ug.14544.14544.3	3.74e-05	R.STLDPVEK[425.27]VLR.D	YAL005C,YLL024C	1552.89	126.127	500107	127.13	87125.9	541632	48466.5	0.0894822	11.1754
0.9817	JL033021_040221_RPA2HFH_Q2_10to1_1ug.14571.14571.3	0.0019	R.LGEHNIDVLEGNEQFINAAK[407.26]II.T	TRYP_PIG	2715.43	126.127	54271.5	127.131	9696.58	58775.8	5518.58	0.093892	10.6505
0.9978	JL033021_040221_RPA2HFH_Q2_10to1_1ug.14596.14596.3	0.0021	N.SQNQLLSK[407.26]VLTTSLLIR.D	YOR341W	2192.3	126.128	100581	127.131	18654	108924	10959.8	0.100619	9.93848
0.9993	JL033021_040221_RPA2HFH_Q2_10to1_1ug.14598.14598.3	0.000153	R.LGEHNIDVLEGNEQFINAAK[425.27]IITH.P	TRYP_PIG	2971.55	126.127	39882.7	127.13	7722.14	43187.9	4694.52	0.1087	9.19964
0.9995	JL033021_040221_RPA2HFH_Q2_10to1_1ug.14603.14603.3	4.44e-05	R.LGEHNIDVLEGNEQFINAAK[407.26]IITHP.N	TRYP_PIG	3050.59	126.127	35695.3	127.131	7393.6	38649.6	4718.37	0.122081	8.19129
0.9991	JL033021_040221_RPA2HFH_Q2_10to1_1ug.14608.14608.3	7.66e-06	R.LGEHNIDVLEGNEQFINAAK[407.26]IITH.P	TRYP_PIG	2953.54	126.127	47299.2	127.131	8378.41	51225.4	4731.97	0.0923755	10.8254
1	JL033021_040221_RPA2HFH_Q2_10to1_1ug.14623.14623.3	0.00106	R.DLNDDLSKLQK[407.26]DK.V	YOR341W	1809.96	126.127	147355	127.131	23276.6	159610	11714.3	0.0733932	13.6252
0.9999	JL033021_040221_RPA2HFH_Q2_10to1_1ug.14633.14633.3	9.13e-05	R.LGEHNIDVLEGNEQFINAAK[407.26]IITH.P	TRYP_PIG	2953.54	126.127	44399.1	127.131	8717.59	48077.6	5355.78	0.111399	8.97677
1	JL033021_040221_RPA2HFH_Q2_10to1_1ug.14665.14665.3	1.24e-07	K.K[425.27]DFEVNISSLDAR.E	YPR110C	1789.93	126.127	116221	127.131	22212.1	125855	13368.6	0.106222	9.41424
1	JL033021_040221_RPA2HFH_Q2_10to1_1ug.14667.14667.3	0.00035	R.LGEHNIDVLEGNEQFINAAK[425.27].L	TRYP_PIG	2507.27	126.127	87078	127.131	14845.6	94311	8091.05	0.0857911	11.6562
0.994	JL033021_040221_RPA2HFH_Q2_10to1_1ug.14690.14690.3	0.00024	R.LGEHNIDVLEGNEQFINAAK[407.26]IIT.H	TRYP_PIG	2816.48	126.127	73970.9	127.13	13111	80111.2	7408.9	0.0924828	10.8128
0.9904	JL033021_040221_RPA2HFH_Q2_10to1_1ug.14703.14703.3	8.29e-10	R.ALAYM[147.04]GLEPNTPLK[425.27]SIK.V	YGL009C	2158.18	126.127	112184	127.13	20495.6	121491	11891.6	0.0978805	10.2165
0.997	JL033021_040221_RPA2HFH_Q2_10to1_1ug.14707.14707.3	2.01e-09	K.FKK[425.27]DFEVNISSLDAR.E	YPR110C	2065.09	126.127	130712	127.131	24434.2	141552	14448.8	0.102074	9.79681
0.9969	JL033021_040221_RPA2HFH_Q2_10to1_1ug.14731.14731.4	0.0973	R.GFGYGTM[147.04]YK[425.27]TEK[425.27]VDLALNR.N	YPR010C	2772.43	126.127	119780	127.13	23542.3	129703	14474.6	0.111598	8.96075
1	JL033021_040221_RPA2HFH_Q2_10to1_1ug.14762.14762.3	7.5e-06	R.LGEHNIDVLEGNEQFINAAK[407.26]I.L	TRYP_PIG	2602.35	126.127	88048.7	127.13	17250.1	95343.9	10580.6	0.110973	9.01123
1	JL033021_040221_RPA2HFH_Q2_10to1_1ug.14815.14815.3	2.68e-05	R.LGEHNIDVLEGNEQFINAAK[425.27].L	TRYP_PIG	2507.27	126.127	84178.1	127.13	14673.7	91167.7	8167.17	0.0895841	11.1627
1	JL033021_040221_RPA2HFH_Q2_10to1_1ug.14846.14846.3	7.63e-06	R.LGEHNIDVLEGNEQFINAAK[425.27].L	TRYP_PIG	2507.27	126.127	88278.6	127.13	16372.6	95600.5	9619.61	0.100623	9.93808
1	JL033021_040221_RPA2HFH_Q2_10to1_1ug.14919.14919.5	4.12e-06	K.LRPGQEISLK[425.27]AHC[160.03]ILGIGGDHAK.F	YPR110C	2766.5	126.127	34884.2	127.13	7613.38	37768.1	5026.71	0.133094	7.51348
1	JL033021_040221_RPA2HFH_Q2_10to1_1ug.15060.15060.3	2.18e-13	K.VIFDGK[425.27]PLNSEDEISNSGYLGNK.L	YPR010C	2792.39	126.127	158482	127.13	31965.5	171605	20026.2	0.116699	8.56904
0.999	JL033021_040221_RPA2HFH_Q2_10to1_1ug.15071.15071.4	0.215	K.ELAEK[425.27]K[425.27]IPLVIR.R	YPR187W	2002.24	126.127	113451	127.13	28096.6	122802	19923	0.162237	6.16384
1	JL033021_040221_RPA2HFH_Q2_10to1_1ug.15135.15135.3	2.47e-12	F.VLK[425.27]YLDSELSAM[147.04]GIR.L	YPR010C	2007.08	126.127	121316	127.13	26184	131348	17167.4	0.130702	7.651
0.961	JL033021_040221_RPA2HFH_Q2_10to1_1ug.15178.15178.3	0.00146	K.YSAVLM[147.04]EFTTPK[425.27]SYANTK.L	YDR346C	2363.18	126.127	118633	127.13	24330.9	128454	15422.5	0.120063	8.32896
1	JL033021_040221_RPA2HFH_Q2_10to1_1ug.15214.15214.3	4.3e-16	K.VIFDGK[425.27]PLNSEDEISNSGYLGNK.L	YPR010C	2792.39	126.127	126324	127.131	29738.7	136749	20527	0.150108	6.66189
1	JL033021_040221_RPA2HFH_Q2_10to1_1ug.15228.15228.3	8.68e-11	R.LTPGAK[425.27]IGDDPATYYGNNINEPWGSM[147.04]R.H	YDR346C	3249.55	126.127	58132.3	127.13	11845.3	62945	7474.49	0.118746	8.42131
0.9947	JL033021_040221_RPA2HFH_Q2_10to1_1ug.15250.15250.3	0.0102	F.VLK[425.27]YLDSELSAM[147.04]GIR.L	YPR010C	2007.08	126.127	92852.5	127.13	20240.9	100529	13354.2	0.132839	7.5279
0.9999	JL033021_040221_RPA2HFH_Q2_10to1_1ug.15276.15276.5	0.00461	R.TQYLNSK[425.27]DVQTTYQHVLTK[425.27]VR.E	YPL260W	3115.68	126.127	89483.4	127.131	16724.8	96904.2	9888.83	0.102048	9.79935
0.9997	JL033021_040221_RPA2HFH_Q2_10to1_1ug.15285.15285.3	0.0401	K.VIFDGK[425.27]PLNSEDEISNSGYLGNK.L	YPR010C	2792.39	126.127	94598.2	127.13	19840.5	102425	12768.3	0.12466	8.02184
0.9952	JL033021_040221_RPA2HFH_Q2_10to1_1ug.15290.15290.3	0.0506	K.VIFDGK[425.27]PLNSEDEISNSGYLGNK.L	YPR010C	2792.39	126.127	91898.8	127.13	16553.8	99525	9488.75	0.0953404	10.4887
1	JL033021_040221_RPA2HFH_Q2_10to1_1ug.15335.15335.4	4.03e-08	K.TK[425.27]EVM[147.04]DFVNTPLTDK[425.27]TTDEVVR.H	YGL244W	3147.62	126.127	111510	127.13	20626.9	120759	12092.8	0.10014	9.98603
1	JL033021_040221_RPA2HFH_Q2_10to1_1ug.15371.15371.4	0.00133	R.GVQK[425.27]YQIADLEEVPHGIVR.Q	YLR328W	2447.33	126.127	40862.3	127.131	7697.87	44250.4	4580.57	0.103515	9.66047
1	JL033021_040221_RPA2HFH_Q2_10to1_1ug.15420.15420.3	0.00797	K.VFSVSETAK[425.27]IPAIDYSK.V	YJL148W	2151.15	126.127	111443	127.13	18894.1	120701	10241.9	0.0848537	11.785
1	JL033021_040221_RPA2HFH_Q2_10to1_1ug.15465.15465.3	0.000617	K.VIFDGK[425.27]PLNSEDEISNSGYLGNK.L	YPR010C	2792.39	126.127	79916.8	127.13	16127.4	86534.4	10107.5	0.116803	8.5614
0.986	JL033021_040221_RPA2HFH_Q2_10to1_1ug.15470.15470.3	0.478	K.RSEYVDM[147.04]AIAK[425.27]ALSDGR.T	YOR341W	2194.11	126.127	146048	127.131	26513.4	158166	15300.1	0.0967344	10.3376
0.9979	JL033021_040221_RPA2HFH_Q2_10to1_1ug.15479.15479.3	1.14e-11	R.VTNTTSTDFPGFSK[425.27]DAENEWNVEK.F	YPR110C	3012.41	126.128	162403	127.131	25476.8	175911	12721.1	0.0723155	13.8283
1	JL033021_040221_RPA2HFH_Q2_10to1_1ug.15488.15488.4	5.14e-12	K.RSEYVDM[147.04]AIAK[425.27]ALSDGR.T	YOR341W	2194.11	126.127	70119.9	127.131	12475.6	75940.1	7073.74	0.093149	10.7355
0.9893	JL033021_040221_RPA2HFH_Q2_10to1_1ug.15490.15490.3	9.1e-07	K.KAVK[407.26]ELYEVDVLK.V	YOL127W	1812.05	126.126	47015.1	127.13	7683.94	50923.1	4013.29	0.0788109	12.6886
0.9901	JL033021_040221_RPA2HFH_Q2_10to1_1ug.15514.15514.4	0.068	R.VPRPVTEK[425.27]LSADYPLLTGQR.V	YDL185W	2536.41	126.127	39526.3	127.13	8081.13	42798.4	5111.2	0.119425	8.37346
1	JL033021_040221_RPA2HFH_Q2_10to1_1ug.15516.15516.4	3.7e-06	K.FK[425.27]K[425.27]DFEVNISSLDAR.E	YPR110C	2362.27	126.127	82539.5	127.131	15874.7	89380.7	9601.19	0.107419	9.30933
1	JL033021_040221_RPA2HFH_Q2_10to1_1ug.15554.15554.3	0.00897	R.SDTLFLGGEK[425.27]ISGDDIR.N	YDR212W	2119.09	126.127	75942	127.13	13105.8	82248.7	7226.41	0.0878605	11.3817
1	JL033021_040221_RPA2HFH_Q2_10to1_1ug.15561.15561.4	4.99e-09	K.RSEYVDM[147.04]AIAK[425.27]ALSDGR.T	YOR341W	2194.11	126.127	75141.1	127.13	12726.1	81383.3	6891.4	0.0846783	11.8094
1	JL033021_040221_RPA2HFH_Q2_10to1_1ug.15576.15576.3	8.8e-06	R.GEVIK[425.27]GWDIGVAGM[147.04]SVGGER.R	YML074C	2329.18	126.127	91841.6	127.13	17313.8	99456.7	10308.2	0.103646	9.64827
1	JL033021_040221_RPA2HFH_Q2_10to1_1ug.15578.15578.4	9.58e-05	K.TPSLTVYLEPGHAADQEQAK[425.27]LIR.S	RPB1-msCTD,YDL140C	2833.51	126.127	64404.1	127.13	13007.3	69737	8156.69	0.116964	8.54967
1	JL033021_040221_RPA2HFH_Q2_10to1_1ug.15628.15628.3	1.23e-05	R.GEVIK[425.27]GWDIGVAGM[147.04]SVGGER.R	YML074C	2329.18	126.127	79531.1	127.13	11667.1	86152.9	5362.55	0.0622446	16.0657
1	JL033021_040221_RPA2HFH_Q2_10to1_1ug.15671.15671.3	6.84e-08	R.NLNNLK[425.27]QENAYLLIR.R	YOR224C	2112.18	126.127	107023	127.131	19218.7	115905	10986.6	0.0947902	10.5496
0.9951	JL033021_040221_RPA2HFH_Q2_10to1_1ug.15756.15756.3	0.159	R.FYPGTLSSFQTDSINNDAK[425.27]SSLR.S	YFL026W	2844.4	126.126	94449.9	127.129	18690.3	102274	11549.1	0.112923	8.85556
0.9979	JL033021_040221_RPA2HFH_Q2_10to1_1ug.15758.15758.3	0.00274	H.INSASQDENK[407.26]TLTNDAM[147.04]NKDLR.T	YGR249W	2772.34	126.126	96428.3	127.13	18008.4	104425	10640.8	0.101899	9.81361
0.9597	JL033021_040221_RPA2HFH_Q2_10to1_1ug.15777.15777.3	0.00864	C.AGPHC[160.03]VAWTLIEK[407.26]LTMMALSGDEKK.L	DECOY_YPL206C_UNMAPPED	3064.56	126.126	55501.5	127.13	12063.2	60090.3	7944.19	0.132204	7.56406
0.9561	JL033021_040221_RPA2HFH_Q2_10to1_1ug.15800.15800.3	2.2e-06	R.EHAPWALK[425.27]DFGIK.S	YGL009C	1807.97	126.127	103241	127.131	16795.3	111823	8729.27	0.078063	12.8102
1	JL033021_040221_RPA2HFH_Q2_10to1_1ug.15806.15806.3	1.3e-10	K.VEK[425.27]AVITVPAYFNDAQR.Q	YDL229W,YNL209W	2217.19	126.127	134255	127.131	24421.8	145394	14117.6	0.0970987	10.2988
1	JL033021_040221_RPA2HFH_Q2_10to1_1ug.15844.15844.3	1.88e-11	K.LDK[425.27]SQVDEIVLVGGSTR.L	YAL005C,YLL024C	2112.15	126.127	101617	127.13	19374.9	110041	11639.3	0.105773	9.45424
1	JL033021_040221_RPA2HFH_Q2_10to1_1ug.15872.15872.4	1.15e-08	R.TLSDYNIQK[425.27]ESTLHLVLR.L	YIL148W,YKR094C,YLL039C,YLR167W	2426.32	126.127	143688	127.131	28804.2	155588	17966.8	0.115477	8.65976
1	JL033021_040221_RPA2HFH_Q2_10to1_1ug.15874.15874.3	4.93e-05	R.TLSDYNIQK[425.27]ESTLHLVLR.L	YIL148W,YKR094C,YLL039C,YLR167W	2426.32	126.127	159546	127.131	30765.7	172769	18645.1	0.107919	9.2662
1	JL033021_040221_RPA2HFH_Q2_10to1_1ug.15878.15878.3	6.72e-07	R.GSFFAQLK[425.27]TTTVR.K	YPR010C	1751.97	126.127	353516	127.131	65772.5	382835	38744.4	0.101204	9.88105
1	JL033021_040221_RPA2HFH_Q2_10to1_1ug.15879.15879.3	6.04e-06	R.TLSDYNIQK[425.27]ESTLHLVLR.L	YIL148W,YKR094C,YLL039C,YLR167W	2426.32	126.127	177261	127.13	32684.1	191964	19110.5	0.0995525	10.0449
1	JL033021_040221_RPA2HFH_Q2_10to1_1ug.15892.15892.3	0.000772	K.IIGWVSHEQGK[425.27]IIADTLR.Y	YPR010C	2332.3	126.127	157469	127.13	25844.2	170558	13557.7	0.0794903	12.5801
0.9746	JL033021_040221_RPA2HFH_Q2_10to1_1ug.15908.15908.3	0.000112	R.K[407.26]NFKSLDTFIK.Q	YGL009C	1618.92	126.127	63189.9	127.131	10739.5	68439	5835.49	0.0852655	11.7281
1	JL033021_040221_RPA2HFH_Q2_10to1_1ug.15968.15968.4	0.000527	R.DAK[425.27]LDK[425.27]SQVDEIVLVGGSTR.L	YAL005C,YLL024C	2723.49	126.127	105645	127.131	20580.5	114399	12569.6	0.109875	9.10126
0.9767	JL033021_040221_RPA2HFH_Q2_10to1_1ug.15995.15995.3	1.45e-08	R.GFGYGTM[147.04]YKTEK[407.26]VDLALNR.N	YPR010C	2457.24	126.127	340568	127.13	61295.4	368831	35109.2	0.0951907	10.5052
0.9997	JL033021_040221_RPA2HFH_Q2_10to1_1ug.15997.15997.3	4.41e-10	R.IINEPTAAAIAYGLDK[425.27]K.G	YAL005C,YBL075C,YER103W,YLL024C	2084.16	126.127	167267	127.131	25946.9	181182	12788.2	0.0705819	14.1679
0.9999	JL033021_040221_RPA2HFH_Q2_10to1_1ug.16017.16017.3	6.51e-06	F.INAAK[407.26]IITHPNFNGNTLDNDIM[147.04]LIK.L	TRYP_PIG	3074.63	126.128	44600.7	127.131	8129.52	48301.1	4707.52	0.097462	10.2604
1	JL033021_040221_RPA2HFH_Q2_10to1_1ug.16029.16029.3	2.36e-06	Q.FINAAK[407.26]IITHPNFNGNTLDNDIM[147.04]LIK.L	TRYP_PIG	3221.7	126.127	38865.5	127.13	7217.63	42088.9	4245.21	0.100863	9.91444
0.9979	JL033021_040221_RPA2HFH_Q2_10to1_1ug.16048.16048.3	0.000297	K.IITHPNFNGNTLDNDIM[147.04]LIK[407.26]LSSPA.T	TRYP_PIG	3032.57	126.127	45158.3	127.13	9229.26	48896.7	5835.93	0.119352	8.37856
1	JL033021_040221_RPA2HFH_Q2_10to1_1ug.16052.16052.3	2.29e-10	R.NLNNLK[425.27]QENAYLLIR.R	YOR224C	2112.18	126.127	604469	127.13	117655	654559	71811.9	0.10971	9.1149
0.9969	JL033021_040221_RPA2HFH_Q2_10to1_1ug.16061.16061.3	0.000541	K.IITHPNFNGNTLDNDIM[147.04]LIK[407.26]LSSPAT.L	TRYP_PIG	3133.62	126.127	44691.9	127.13	7807.78	48402.6	4354.56	0.0899654	11.1154
1	JL033021_040221_RPA2HFH_Q2_10to1_1ug.16067.16067.3	1.97e-09	R.IASK[425.27]NQLESIAYSLK.N	YAL005C,YLL024C	1961.09	126.127	67506.7	127.13	11433	73114.7	6191.18	0.0846776	11.8095
1	JL033021_040221_RPA2HFH_Q2_10to1_1ug.16085.16085.3	9.23e-06	K.IITHPNFNGNTLDNDIM[147.04]LIK[425.27].L	TRYP_PIG	2595.34	126.128	76306.9	127.131	12884.3	82646.3	6956.28	0.0841693	11.8808
1	JL033021_040221_RPA2HFH_Q2_10to1_1ug.16096.16096.3	1.73e-05	K.IITHPNFNGNTLDNDIMLIK[407.26]LS.S	TRYP_PIG	2761.46	126.127	60835.2	127.13	12443.2	65871.4	7872.6	0.119515	8.36717
1	JL033021_040221_RPA2HFH_Q2_10to1_1ug.16117.16117.3	5.41e-06	K.QSK[425.27]DISSTLLNELK.S	YOR341W	1872.03	126.126	54019.4	127.13	8992.56	58508.3	4786.78	0.0818137	12.2229
0.9523	JL033021_040221_RPA2HFH_Q2_10to1_1ug.16125.16125.3	0.0387	N.YRNLNNLK[407.26]QENAYLLIR.R	YOR224C	2413.33	126.127	119205	127.131	23832.5	129078	14837.1	0.114947	8.69964
0.9978	JL033021_040221_RPA2HFH_Q2_10to1_1ug.16132.16132.3	0.00266	K.IITHPNFNGNTLDNDIM[147.04]LIK[425.27]LSSPA.T	TRYP_PIG	3050.58	126.127	57675.1	127.13	10089.7	62463.7	5634.25	0.0902004	11.0864
0.9938	JL033021_040221_RPA2HFH_Q2_10to1_1ug.16136.16136.3	1.93e-05	K.IITHPNFNGNTLDNDIMLIK[407.26]LS.S	TRYP_PIG	2761.46	126.127	75958.3	127.13	14500.6	82254.9	8719.59	0.106007	9.43334
1	JL033021_040221_RPA2HFH_Q2_10to1_1ug.16141.16141.3	8.67e-05	K.IITHPNFNGNTLDNDIMLIK[407.26]LSSPA.T	TRYP_PIG	3016.58	126.127	54188.8	127.13	11861.8	58668.3	7846.21	0.133739	7.47727
1	JL033021_040221_RPA2HFH_Q2_10to1_1ug.16145.16145.3	0.00397	R.QATK[407.26]DAGAISGLNVLR.L	YDL229W,YNL209W	1892.06	126.127	97970.5	127.131	18481.2	106094	11009.1	0.103768	9.63692
1	JL033021_040221_RPA2HFH_Q2_10to1_1ug.16190.16190.3	3.52e-06	R.NDK[425.27]FTVSAIYSDLPQQER.D	YJL138C,YKR059W	2407.21	126.127	95658.1	127.13	18069.7	103589	10775.6	0.104022	9.61332
1	JL033021_040221_RPA2HFH_Q2_10to1_1ug.16212.16212.3	1.14e-08	G.DK[425.27]FRVVFQASPDQSDLEVGQEVLDR.L	YPR010C	3173.61	126.127	48744.1	127.13	8788.72	52789.1	5041.93	0.0955109	10.47
1	JL033021_040221_RPA2HFH_Q2_10to1_1ug.16238.16238.3	1.49e-07	R.NLNNLK[425.27]QENAYLLIR.R	YOR224C	2112.18	126.126	102820	127.13	21762.8	111326	14090.2	0.126567	7.90096
1	JL033021_040221_RPA2HFH_Q2_10to1_1ug.16243.16243.3	7e-09	R.NLNNLK[425.27]QENAYLLIR.R	YOR224C	2112.18	126.127	106223	127.13	20681.6	115025	12626	0.109767	9.11017
1	JL033021_040221_RPA2HFH_Q2_10to1_1ug.16244.16244.3	2e-07	K.AIFEILNK[425.27]SNYDTNR.K	YOR270C	2094.08	126.127	134520	127.13	25280.7	145675	15014.1	0.103066	9.70255
0.9896	JL033021_040221_RPA2HFH_Q2_10to1_1ug.16281.16281.3	0.0363	R.PVPEEYLQTDPSYGLTSDEVLK[425.27]R.R	YGL008C	2932.48	126.127	81258.6	127.13	13657.1	88009.9	7339.92	0.0833988	11.9906
0.9929	JL033021_040221_RPA2HFH_Q2_10to1_1ug.16341.16341.3	2.32e-10	K.DAK[407.26]ISKSQIDEVVLVGGSTR.L	YDL229W,YNL209W	2380.3	126.127	92751.5	127.13	17662.9	100441	10600.7	0.105542	9.47494
1	JL033021_040221_RPA2HFH_Q2_10to1_1ug.16360.16360.4	6.38e-08	R.SAIEHTTLK[425.27]SVTIASEIYYDPDPR.S	RPB1-msCTD,YDL140C	3002.53	126.127	67264.7	127.131	18744.7	72792.1	14047.9	0.192987	5.18169
0.9682	JL033021_040221_RPA2HFH_Q2_10to1_1ug.16369.16369.3	2.86e-08	K.DAK[407.26]ISKSQIDEVVLVGGSTR.L	YDL229W,YNL209W	2380.3	126.127	114488	127.13	22800	123971	14154.2	0.114174	8.75858
1	JL033021_040221_RPA2HFH_Q2_10to1_1ug.16386.16386.4	7.67e-09	R.SAIEHTTLK[425.27]SVTIASEIYYDPDPR.S	RPB1-msCTD,YDL140C	3002.53	126.127	70231.6	127.131	19229.2	76005.6	14300.7	0.188154	5.3148
0.9984	JL033021_040221_RPA2HFH_Q2_10to1_1ug.16441.16441.3	0.0182	R.NLNNLK[425.27]QENAYLLIR.R	YOR224C	2112.18	126.128	134282	127.131	26198	145409	16018.4	0.110161	9.07765
1	JL033021_040221_RPA2HFH_Q2_10to1_1ug.16453.16453.3	0.000551	K.FLQNSNLGGIIPTVNGK[425.27]PVR.Q	YAR010C,YBR012W-A,YBR012W-B,YDR098C-A,YDR098C-B,YDR210C-C,YDR210C-D,YDR261C-C,YDR261C-D,YDR316W-A,YDR316W-B,YDR365W-A,YDR365W-B,YER137C-A,YER138C,YER159C-A,YER160C,YGR027W-A,YGR027W-B,YGR038C-A,YGR038C-B,YGR161C-C,YGR161C-D,YHR214C-B,YHR214C-C,YJR026W,YJR027W,YJR028W,YJR029W,YLR157C-A,YLR157C-B,YLR227W-A,YLR227W-B,YLR256W-A,YML039W,YML040W,YML045W,YML045W-A,YMR050C,YMR051C,YNL054W-A,YNL054W-B,YOL…	2420.36	126.127	111085	127.13	20476.5	120300	11969.8	0.0994999	10.0503
1	JL033021_040221_RPA2HFH_Q2_10to1_1ug.16454.16454.3	0.000317	R.ISPK[425.27]ILDEFYDR.A	YBR127C	1791.95	126.127	93528.6	127.13	18973	101272	11934.8	0.117848	8.48551
0.9707	JL033021_040221_RPA2HFH_Q2_10to1_1ug.16481.16481.4	0.158	R.IINEPTAAAIAYGLGAGK[425.27]SEK[425.27]ER.H	YDL229W,YNL209W	2952.61	126.127	96627	127.131	17272.1	104647	9833.96	0.0939731	10.6413
0.9999	JL033021_040221_RPA2HFH_Q2_10to1_1ug.16504.16504.3	0.0095	R.NLNNLK[425.27]QENAYLLIR.R	YOR224C	2112.18	126.127	103039	127.13	19106.8	111585	11224.4	0.100591	9.94129
0.9971	JL033021_040221_RPA2HFH_Q2_10to1_1ug.16510.16510.3	0.000592	R.QATK[407.26]DAGTIAGLNVLR.L	YAL005C,YER103W,YJL034W,YLL024C	1906.07	126.127	77398.8	127.13	15393.2	83809.7	9546.78	0.11391	8.77885
0.9736	JL033021_040221_RPA2HFH_Q2_10to1_1ug.16536.16536.3	0.0392	Q.AISLVNYNVEK[407.26]FGTER.R	YNL104C	2118.12	126.127	82616.7	127.13	16234.2	89461.5	9979.56	0.111551	8.96448
0.9698	JL033021_040221_RPA2HFH_Q2_10to1_1ug.16557.16557.3	3.07e-06	R.ALAYM[147.04]GLEPNTPLKSIK[407.26]VDK.V	YGL009C	2482.36	126.127	121088	127.13	19834.2	131152	10383.6	0.0791721	12.6307
0.9862	JL033021_040221_RPA2HFH_Q2_10to1_1ug.16563.16563.3	1.02e-09	R.ALAYM[147.04]GLEPNTPLKSIK[407.26]VDK.V	YGL009C	2482.36	126.127	145335	127.13	26530.5	157392	15382.5	0.0977335	10.2319
0.9999	JL033021_040221_RPA2HFH_Q2_10to1_1ug.16584.16584.3	1.56e-05	L.NAAK[407.26]IITHPNFNGNTLDNDIM[147.04]LIK.L	TRYP_PIG	2961.55	126.127	61655.6	127.131	12320.5	66762	7667.45	0.114848	8.7072
0.9976	JL033021_040221_RPA2HFH_Q2_10to1_1ug.16586.16586.3	2.38e-05	Q.FINAAK[407.26]IITHPNFNGNTLDNDIM[147.04]LIK.L	TRYP_PIG	3221.7	126.127	44879	127.13	9380.01	48592.6	6022.53	0.123939	8.06847
1	JL033021_040221_RPA2HFH_Q2_10to1_1ug.16588.16588.3	0.00028	R.K[425.27]LAVNLVPFPR.L	YFL037W	1549.94	126.127	47825.9	127.131	9141.96	51790.3	5502.89	0.106253	9.41147
0.9994	JL033021_040221_RPA2HFH_Q2_10to1_1ug.16591.16591.3	5.03e-05	N.AAK[425.27]IITHPNFNGNTLDNDIM[147.04]LIK.L	TRYP_PIG	2865.51	126.127	71659.9	127.131	13921.4	77598.2	8484.76	0.109342	9.1456
1	JL033021_040221_RPA2HFH_Q2_10to1_1ug.16592.16592.3	1.19e-10	R.IVVGK[425.27]LNNVGTGSFDVLAK.V	YOR341W	2227.27	126.127	174903	127.13	25411	189468	11528.5	0.0608466	16.4348
1	JL033021_040221_RPA2HFH_Q2_10to1_1ug.16620.16620.3	1.84e-06	F.INAAK[425.27]IITHPNFNGNTLDNDIM[147.04]LIK.L	TRYP_PIG	3092.64	126.127	56284.6	127.131	12442.4	60936.3	8280.2	0.135883	7.35928
1	JL033021_040221_RPA2HFH_Q2_10to1_1ug.16626.16626.3	6.21e-06	R.GQKLASNIK[407.26]LAM[147.04]VVPGSGLVK.K	YGL009C	2404.4	126.127	97284.4	127.13	18127.7	105353	10691.8	0.101486	9.8536
0.9989	JL033021_040221_RPA2HFH_Q2_10to1_1ug.16669.16669.3	0.339	R.SEYVDM[147.04]AIAK[425.27]ALSDGR.T	YOR341W	2038.01	126.127	76497.9	127.13	16682.4	82822.1	11009.1	0.132925	7.52304
0.9995	JL033021_040221_RPA2HFH_Q2_10to1_1ug.16715.16715.3	0.0519	Q.AISLVNYNVEK[407.26]FGTER.R	YNL104C	2118.12	126.127	86421.9	127.131	15873.7	93591	9251.61	0.0988514	10.1162
0.9998	JL033021_040221_RPA2HFH_Q2_10to1_1ug.16753.16753.3	5.62e-11	R.DAK[407.26]LDKSQVDEIVLVGGSTR.L	YAL005C,YLL024C	2408.3	126.127	124125	127.131	21723.8	134430	12135.8	0.0902761	11.0771
1	JL033021_040221_RPA2HFH_Q2_10to1_1ug.16775.16775.3	1e-06	R.DFK[425.27]GLPPAQDFSAAPIQVSTTEK.K	YDR156W	2743.41	126.127	95493	127.13	17761.2	103413	10459.9	0.101147	9.88661
0.9948	JL033021_040221_RPA2HFH_Q2_10to1_1ug.16779.16779.3	6.57e-08	K.FK[407.26]KDFEVNISSLDAR.E	YPR110C	2047.08	126.127	96504.6	127.131	18675	104502	11348.3	0.108594	9.20862
1	JL033021_040221_RPA2HFH_Q2_10to1_1ug.16818.16818.3	0.00351	R.IFEFPK[425.27]TTVAALR.F	YNL301C,YOL120C	1789.02	126.127	76204	127.13	15043.4	82517	9279.2	0.112452	8.89268
0.9599	JL033021_040221_RPA2HFH_Q2_10to1_1ug.16833.16833.3	0.245	R.LETIYLEGNPIQLENK[425.27]TSYR.R	YKL193C	2677.4	126.127	102659	127.13	20296	111163	12532.8	0.112743	8.86977
1	JL033021_040221_RPA2HFH_Q2_10to1_1ug.16838.16838.3	0.000744	R.LETIYLEGNPIQLENK[425.27]TSYR.R	YKL193C	2677.4	126.127	103487	127.13	19407.4	112069	11506.2	0.102671	9.73985
0.9999	JL033021_040221_RPA2HFH_Q2_10to1_1ug.16845.16845.3	0.00107	R.IVVGK[425.27]LNNVGTGSFDVLAK.V	YOR341W	2227.27	126.127	106740	127.13	21032.1	115582	12955.3	0.112087	8.92166
1	JL033021_040221_RPA2HFH_Q2_10to1_1ug.16850.16850.3	0.000785	R.EGLIDTAVK[425.27]TAETGYIQR.R	RPB1-msCTD,YDL140C	2261.2	126.127	115436	127.131	20522.8	125018	11628.8	0.0930176	10.7506
1	JL033021_040221_RPA2HFH_Q2_10to1_1ug.16852.16852.3	6.06e-06	R.LETIYLEGNPIQLENK[425.27]TSYR.R	YKL193C	2677.4	126.127	121755	127.13	21877.4	131859	12513.2	0.0948982	10.5376
1	JL033021_040221_RPA2HFH_Q2_10to1_1ug.16866.16866.3	0.00602	R.IVVGK[425.27]LNNVGTGSFDVLAK.V	YOR341W	2227.27	126.127	109696	127.13	19705.9	118800	11268.8	0.0948552	10.5424
1	JL033021_040221_RPA2HFH_Q2_10to1_1ug.16929.16929.3	2.44e-07	R.SEYVDM[147.04]AIAK[425.27]ALSDGR.T	YOR341W	2038.01	126.128	137149	127.131	28192.9	148502	17898.7	0.120528	8.29681
1	JL033021_040221_RPA2HFH_Q2_10to1_1ug.16932.16932.3	1.42e-08	K.FKK[407.26]DFEVNISSLDAR.E	YPR110C	2047.08	126.128	309610	127.131	54184	335316	30268	0.0902672	11.0782
0.994	JL033021_040221_RPA2HFH_Q2_10to1_1ug.16971.16971.3	0.00287	K.FK[407.26]PNNIILQTLNRGPIS.K	DECOY_YML091C_UNMAPPED	2203.26	126.127	59277.7	127.13	11225.1	64192.3	6707.06	0.104484	9.57085
1	JL033021_040221_RPA2HFH_Q2_10to1_1ug.17061.17061.3	7.29e-05	R.LGTLVNQK[425.27]TSAVAALTEVR.A	YHL033C,YLL045C	2267.29	126.127	99439.4	127.13	19050.9	107682	11487.7	0.106681	9.3737
1	JL033021_040221_RPA2HFH_Q2_10to1_1ug.17082.17082.3	1.48e-10	R.SEYVDM[147.04]AIAK[425.27]ALSDGR.T	YOR341W	2038.01	126.127	450204	127.13	97148.8	487432	63686.8	0.130658	7.65358
1	JL033021_040221_RPA2HFH_Q2_10to1_1ug.17092.17092.3	2.23e-09	K.FK[407.26]KDFEVNISSLDAR.E	YPR110C	2047.08	126.127	114716	127.131	22167.8	124223	13456.3	0.108323	9.23164
1	JL033021_040221_RPA2HFH_Q2_10to1_1ug.17097.17097.3	1.36e-07	R.TSIIGTIGPK[425.27]TNNPETLVALR.K	YAL038W	2491.41	126.127	165704	127.131	34973.6	179413	22601.3	0.125974	7.93816
0.9978	JL033021_040221_RPA2HFH_Q2_10to1_1ug.17136.17136.3	0.171	L.QLYLAM[147.04]LYSGK[407.26].Y	DECOY_YGR110W_UNMAPPED	1580.84	126.127	9054.08	127.131	1318.46	9808	600.028	0.0611774	16.3459
1	JL033021_040221_RPA2HFH_Q2_10to1_1ug.17161.17161.3	2.03e-05	R.TNTLTK[425.27]AAIVQIDATPFR.Q	YBL072C,YER102W	2256.26	126.127	113390	127.13	22852.7	122779	14309.2	0.116544	8.58042
1	JL033021_040221_RPA2HFH_Q2_10to1_1ug.17191.17191.3	1.15e-05	R.TQVLQYLGDK[425.27]FR.V	YPR010C	1763.97	126.127	150364	127.131	28634.4	162829	17185.5	0.105543	9.47482
1	JL033021_040221_RPA2HFH_Q2_10to1_1ug.17194.17194.3	1.94e-15	R.K[425.27]VFQM[147.04]NYFSDGLFAEDEYQR.Y	YGL244W	2799.29	126.127	126539	127.13	26348.4	137010	16874.7	0.123164	8.11925
1	JL033021_040221_RPA2HFH_Q2_10to1_1ug.17205.17205.3	6.26e-06	T.NEIGVPPVFAVK[407.26]LTYPEPVTAYNIAELR.Q	YOR341W	3378.83	126.127	58447.5	127.13	11861.6	63286.7	7463.66	0.117934	8.47931
1	JL033021_040221_RPA2HFH_Q2_10to1_1ug.17225.17225.4	9.36e-17	K.IK[425.27]LLTQATSEDGTSASFQIVEEDHTLGNALR.Y	YNL113W	3640.87	126.127	108710	127.13	20832.8	117721	12564.8	0.106734	9.3691
1	JL033021_040221_RPA2HFH_Q2_10to1_1ug.17248.17248.3	5.33e-12	K.IK[425.27]LLTQATSEDGTSASFQIVEEDHTLGNALR.Y	YNL113W	3640.87	126.127	61994.3	127.13	12588.1	67127.2	7923.73	0.118041	8.47166
1	JL033021_040221_RPA2HFH_Q2_10to1_1ug.17271.17271.3	2.62e-10	K.IK[425.27]LLTQATSEDGTSASFQIVEEDHTLGNALR.Y	YNL113W	3640.87	126.127	58419.8	127.13	11593.2	63258.9	7178.55	0.113479	8.81221
0.9998	JL033021_040221_RPA2HFH_Q2_10to1_1ug.17274.17274.3	0.00071	Q.NRTQVLQYLGDK[425.27]FR.V	YPR010C	2034.11	126.127	215878	127.131	40792.6	233777	24332.6	0.104085	9.60755
1	JL033021_040221_RPA2HFH_Q2_10to1_1ug.17307.17307.3	2.11e-05	K.K[425.27]YNPSALIEHLDVESALK.Y	YOR341W	2323.25	126.127	135632	127.131	23736.3	146893	13259.3	0.0902649	11.0785
1	JL033021_040221_RPA2HFH_Q2_10to1_1ug.17331.17331.4	3.61e-10	K.K[425.27]YNPSALIEHLDVESALK.Y	YOR341W	2323.25	126.127	110963	127.131	18902.6	120181	10294.1	0.0856557	11.6747
1	JL033021_040221_RPA2HFH_Q2_10to1_1ug.17356.17356.3	5.16e-07	R.TQVLQYLGDK[425.27]FR.V	YPR010C	1763.97	126.127	688684	127.131	139310	745709	87457	0.11728	8.52658
1	JL033021_040221_RPA2HFH_Q2_10to1_1ug.17366.17366.3	1.2e-05	K.SISK[425.27]VLLSEVIDK.V	YOR341W	1727.02	126.127	60914	127.13	10973	65968.9	6290	0.095348	10.4879
1	JL033021_040221_RPA2HFH_Q2_10to1_1ug.17381.17381.3	2.61e-05	R.ADPVALYLGLK[425.27]R.G	YBR154C	1611.94	126.127	143242	127.13	29698	155096	18964.6	0.122276	8.17819
1	JL033021_040221_RPA2HFH_Q2_10to1_1ug.17398.17398.3	5.92e-05	R.YQALSDPK[425.27]QLETEPDLFIR.L	YMR186W	2559.33	126.127	122697	127.13	23366.9	132869	14024.7	0.105553	9.47395
1	JL033021_040221_RPA2HFH_Q2_10to1_1ug.17412.17412.4	2.96e-17	K.IK[425.27]LLTQATSEDGTSASFQIVEEDHTLGNALR.Y	YNL113W	3640.87	126.127	87092.1	127.13	18234.2	94298.5	11720.9	0.124296	8.04533
1	JL033021_040221_RPA2HFH_Q2_10to1_1ug.17413.17413.3	2.76e-17	K.SQFSNLK[425.27]VVTTTADDAFPSSLR.A	YJR063W	2680.38	126.127	134579	127.131	26107.3	145731	15894.6	0.109068	9.1686
1	JL033021_040221_RPA2HFH_Q2_10to1_1ug.17441.17441.4	5.37e-18	K.IK[425.27]LLTQATSEDGTSASFQIVEEDHTLGNALR.Y	YNL113W	3640.87	126.127	85568.4	127.13	17378.1	92653.1	10940.4	0.118079	8.46891
1	JL033021_040221_RPA2HFH_Q2_10to1_1ug.17448.17448.4	3.63e-09	K.SQFSNLK[425.27]VVTTTADDAFPSSLR.A	YJR063W	2680.38	126.127	50904.3	127.131	9142.9	55128.8	5227.54	0.0948241	10.5458
0.9623	JL033021_040221_RPA2HFH_Q2_10to1_1ug.17460.17460.3	4.18e-07	R.IINEPTAAAIAYGLGAGKSEK[407.26]ER.H	YDL229W,YNL209W	2637.42	126.127	242245	127.131	41518.4	262365	22743.3	0.0866857	11.5359
0.9853	JL033021_040221_RPA2HFH_Q2_10to1_1ug.17483.17483.3	0.357	R.AVNTGM[147.04]EPGK[425.27]TSFFQALGVPTK.L	YLR340W	2592.33	126.127	101163	127.13	21758.7	109529	14234.5	0.129961	7.69461
0.9761	JL033021_040221_RPA2HFH_Q2_10to1_1ug.17484.17484.3	3.22e-06	R.IINEPTAAAIAYGLDKK[407.26]GK.E	YAL005C,YLL024C	2251.27	126.127	107287	127.13	19002.1	116192	10730.9	0.0923545	10.8278
1	JL033021_040221_RPA2HFH_Q2_10to1_1ug.17510.17510.3	3.02e-06	R.TQVLQYLGDK[425.27]FR.V	YPR010C	1763.97	126.127	181167	127.131	40034.1	196140	26635.9	0.135801	7.36373
0.9995	JL033021_040221_RPA2HFH_Q2_10to1_1ug.17543.17543.3	0.0742	R.ADPVALYLGLK[425.27]R.G	YBR154C	1611.94	126.127	47674.4	127.13	10684	51613.4	7168.9	0.138896	7.19962
0.9948	JL033021_040221_RPA2HFH_Q2_10to1_1ug.17550.17550.3	0.302	R.ADPVALYLGLK[425.27]R.G	YBR154C	1611.94	126.127	37080.3	127.13	9880.33	40131	7258.78	0.180877	5.52862
1	JL033021_040221_RPA2HFH_Q2_10to1_1ug.17558.17558.4	2.37e-07	R.IVQIM[147.04]QNPTHYK[425.27]IPAWFLNR.Q	YDR450W,YML026C	2781.49	126.127	77242.6	127.13	15176.4	83642.1	9328.45	0.111528	8.96634
1	JL033021_040221_RPA2HFH_Q2_10to1_1ug.17559.17559.3	3.46e-06	R.TGLK[407.26]KGLFYEWR.F	YGL009C	1775.98	126.126	54931.9	127.13	9185.71	59496.3	4911.84	0.0825571	12.1128
1	JL033021_040221_RPA2HFH_Q2_10to1_1ug.17584.17584.3	0.0109	R.SEYVDM[147.04]AIAK[407.26]ALSDGR.T	YOR341W	2020	126.127	87114.2	127.13	15687.1	94343.4	8989.48	0.0952847	10.4949
0.998	JL033021_040221_RPA2HFH_Q2_10to1_1ug.17585.17585.3	0.0624	R.TQVLQYLGDK[425.27]FR.V	YPR010C	1763.97	126.127	45919.6	127.13	8655.4	49727.1	5152.63	0.103618	9.65081
1	JL033021_040221_RPA2HFH_Q2_10to1_1ug.17607.17607.4	1.63e-11	K.IK[425.27]LLTQATSEDGTSASFQIVEEDHTLGNALR.Y	YNL113W	3640.87	126.127	69241.2	127.131	12859	74983.9	7563.48	0.100868	9.91394
1	JL033021_040221_RPA2HFH_Q2_10to1_1ug.17661.17661.4	0.000664	R.LQVK[425.27]TLENNVK[425.27]QFGVPYFGM[147.04]SDAR.Q	YGL009C	3350.75	126.127	93944	127.13	17953.6	101731	10805.1	0.106212	9.41513
1	JL033021_040221_RPA2HFH_Q2_10to1_1ug.17680.17680.4	3.93e-09	K.IK[425.27]LLTQATSEDGTSASFQIVEEDHTLGNALR.Y	YNL113W	3640.87	126.127	67988.6	127.13	15139.6	73606.8	10119.8	0.137484	7.27358
0.9973	JL033021_040221_RPA2HFH_Q2_10to1_1ug.17729.17729.4	0.052	R.LQVK[425.27]TLENNVK[425.27]QFGVPYFGM[147.04]SDAR.Q	YGL009C	3350.75	126.127	83418.7	127.13	15734.6	90335.4	9372.23	0.103749	9.63862
0.9962	JL033021_040221_RPA2HFH_Q2_10to1_1ug.17772.17772.3	2.23e-11	R.K[407.26]DDQGKDQETDFVLNVEPWR.E	YGL009C	2697.31	126.127	146204	127.13	29876.7	158307	18890.2	0.119326	8.38038
1	JL033021_040221_RPA2HFH_Q2_10to1_1ug.17778.17778.3	0.00406	R.TQVLQYLGDK[425.27]FR.V	YPR010C	1763.97	126.127	68601.1	127.131	19559.2	74234.6	14800.8	0.199379	5.01558
1	JL033021_040221_RPA2HFH_Q2_10to1_1ug.17796.17796.4	2.03e-10	R.NRIDSDK[425.27]LTDSAIDIVDSVR.T	YNL248C	2528.32	126.127	105734	127.131	19971.9	114500	11909.5	0.104013	9.61418
0.999	JL033021_040221_RPA2HFH_Q2_10to1_1ug.17835.17835.3	0.0329	R.NRIDSDK[425.27]LTDSAIDIVDSVR.T	YNL248C	2528.32	126.127	180900	127.13	36110.5	195883	22455.4	0.114637	8.72318
0.9968	JL033021_040221_RPA2HFH_Q2_10to1_1ug.17866.17866.3	0.0388	R.ELYPYQM[147.04]K[425.27]LASLDNLR.T	YPL260W	2266.17	126.127	112619	127.13	22081.9	121950	13552.5	0.111132	8.99833
1	JL033021_040221_RPA2HFH_Q2_10to1_1ug.17877.17877.3	2.38e-05	R.LPLQDVYK[425.27]IGGIGTVPVGR.V	YBR118W,YPR080W	2278.31	126.127	145354	127.13	28243.7	157399	17216.6	0.109382	9.14227
0.9839	JL033021_040221_RPA2HFH_Q2_10to1_1ug.17884.17884.3	0.00205	E.RM[147.04]QK[407.26]EITALAPSSM[147.04]KVK.L	YFL039C	2228.21	126.128	98323.5	127.131	21916.8	106448	14658.9	0.137709	7.26168
1	JL033021_040221_RPA2HFH_Q2_10to1_1ug.17895.17895.4	5.31e-05	K.IK[425.27]LLTQATSEDGTSASFQIVEEDHTLGNALR.Y	YNL113W	3640.87	126.127	80341.6	127.131	14782.1	87006.2	8627.73	0.0991623	10.0845
1	JL033021_040221_RPA2HFH_Q2_10to1_1ug.17899.17899.3	8.79e-05	R.LPLQDVYK[425.27]IGGIGTVPVGR.V	YBR118W,YPR080W	2278.31	126.127	133665	127.13	25034.3	144749	14826.8	0.102431	9.76268
1	JL033021_040221_RPA2HFH_Q2_10to1_1ug.17906.17906.3	2.06e-07	R.K[425.27]NEYLVPVVM[147.04]ILK.A	YPR010C	1858.07	126.127	73928.2	127.13	12955.2	80066	7245.81	0.090498	11.05
1	JL033021_040221_RPA2HFH_Q2_10to1_1ug.17921.17921.4	3.12e-12	R.K[425.27]EGGLGPINIPLLADTNHSLSR.D	YML028W	2598.42	126.127	50446.9	127.13	10676.6	54620.1	6912.11	0.126549	7.90208
1	JL033021_040221_RPA2HFH_Q2_10to1_1ug.17933.17933.4	1.24e-05	R.RM[147.04]ILTHVDLIEK[425.27]FLR.Y	YOR210W	2196.25	126.127	71212.2	127.13	15632.4	77098.6	10358.5	0.134354	7.44304
1	JL033021_040221_RPA2HFH_Q2_10to1_1ug.17937.17937.3	8.22e-09	K.VEGK[425.27]TPGLPIDLEIGYVPPSTR.G	YPR010C	2634.43	126.127	118943	127.131	24011.7	128792	15052.6	0.116875	8.55614
1	JL033021_040221_RPA2HFH_Q2_10to1_1ug.17953.17953.3	6.92e-08	K.VEGK[425.27]TPGLPIDLEIGYVPPSTR.G	YPR010C	2634.43	126.127	115379	127.13	22951.2	124935	14236.2	0.113948	8.7759
1	JL033021_040221_RPA2HFH_Q2_10to1_1ug.17956.17956.4	8.47e-06	K.NQGVIQLDGFSQDDYNLIK[425.27]NDFHR.R	YML069W	3132.53	126.127	85893.2	127.13	15773.3	93018.5	9191.48	0.0988135	10.1201
1	JL033021_040221_RPA2HFH_Q2_10to1_1ug.17960.17960.3	7.32e-10	K.VEGK[425.27]TPGLPIDLEIGYVPPSTR.G	YPR010C	2634.43	126.127	115894	127.13	23772	125487	15069.6	0.120089	8.32718
1	JL033021_040221_RPA2HFH_Q2_10to1_1ug.17964.17964.5	1.83e-09	R.RM[147.04]ILTHVDLIEK[425.27]FLR.Y	YOR210W	2196.25	126.127	121414	127.131	23935.3	131473	14748.9	0.112182	8.9141
1	JL033021_040221_RPA2HFH_Q2_10to1_1ug.17981.17981.4	3.41e-05	K.NQGVIQLDGFSQDDYNLIK[425.27]NDFHR.R	YML069W	3132.53	126.127	76841.7	127.13	17036.2	83192	11357.4	0.13652	7.32492
1	JL033021_040221_RPA2HFH_Q2_10to1_1ug.17991.17991.3	0.00103	R.K[425.27]TLEEINELYHDEIDPATLNFR.N	YML123C	2956.49	126.126	91020.8	127.13	20067.1	98543.9	13332.3	0.135294	7.39134
1	JL033021_040221_RPA2HFH_Q2_10to1_1ug.17997.17997.4	3.52e-15	R.K[425.27]TLEEINELYHDEIDPATLNFR.N	YML123C	2956.49	126.127	79945.5	127.131	17328.5	86555.6	11391.9	0.131614	7.59798
1	JL033021_040221_RPA2HFH_Q2_10to1_1ug.18000.18000.4	1.35e-15	R.K[425.27]TLEEINELYHDEIDPATLNFR.N	YML123C	2956.49	126.127	76386.6	127.131	14427.5	82720.1	8602.77	0.103999	9.61551
1	JL033021_040221_RPA2HFH_Q2_10to1_1ug.18060.18060.4	1.05e-09	R.IPKVQK[407.26]LVTDYFNGKEPNR.S	YAL005C,YLL024C	2524.39	126.127	41922.1	127.131	5813.2	45415.3	2465.86	0.0542958	18.4176
1	JL033021_040221_RPA2HFH_Q2_10to1_1ug.18065.18065.3	8.57e-07	R.K[425.27]NEYLVPVVM[147.04]ILK.A	YPR010C	1858.07	126.127	73144.4	127.131	16006	79191	10585.4	0.133669	7.48115
0.9999	JL033021_040221_RPA2HFH_Q2_10to1_1ug.18071.18071.3	0.016	R.QGM[147.04]K[425.27]TIFGWFR.W	YNL246W	1682.87	126.127	50372.5	127.13	7578.68	54564.9	3599.1	0.0659599	15.1607
0.9944	JL033021_040221_RPA2HFH_Q2_10to1_1ug.18124.18124.3	0.000105	N.DVAAVLK[407.26]TYGVEAARNTIVNEINNVFSR.Y	YOR341W	3341.78	126.127	53446.3	127.13	9914.57	57879.1	5826.25	0.100662	9.9342
1	JL033021_040221_RPA2HFH_Q2_10to1_1ug.18132.18132.4	1.19e-05	R.K[425.27]ILIAEGWIPRDELATLQAR.L	YOR270C	2589.47	126.127	38166.5	127.13	8126.18	41323.4	5281.55	0.12781	7.82411
1	JL033021_040221_RPA2HFH_Q2_10to1_1ug.18140.18140.3	0.000627	R.FPFK[425.27]IPTFR.G	YOL129W	1448.83	126.127	49247.9	127.13	9431.91	53330.1	5685.94	0.106618	9.3793
0.9979	JL033021_040221_RPA2HFH_Q2_10to1_1ug.18147.18147.3	3.49e-05	N.DVAAVLK[407.26]TYGVEAARNTIVNEINNVFSR.Y	YOR341W	3341.78	126.127	57329.2	127.131	11702.5	62075.4	7393.54	0.119106	8.39589
1	JL033021_040221_RPA2HFH_Q2_10to1_1ug.18254.18254.3	1.59e-13	K.VEGK[425.27]TPGLPIDLEIGYVPPSTR.G	YPR010C	2634.43	126.127	105834	127.13	21368.7	114598	13397.3	0.116907	8.5538
1	JL033021_040221_RPA2HFH_Q2_10to1_1ug.18277.18277.4	2.39e-09	K.VEGK[425.27]TPGLPIDLEIGYVPPSTR.G	YPR010C	2634.43	126.127	45055.8	127.131	9517.14	48783.2	6153.6	0.126142	7.92758
1	JL033021_040221_RPA2HFH_Q2_10to1_1ug.18284.18284.3	0.00134	R.LLPQINILQPIK[425.27]GESAR.R	YPR110C	2186.29	126.127	135425	127.13	25709.1	146652	15392	0.104956	9.52783
0.9611	JL033021_040221_RPA2HFH_Q2_10to1_1ug.18300.18300.4	0.174	R.AVNTGM[147.04]EPGK[425.27]TSFFQALGVPTK[425.27]IAR.G	YLR340W	3229.73	126.127	80931.6	127.13	16648.7	87630.6	10575	0.120677	8.2866
1	JL033021_040221_RPA2HFH_Q2_10to1_1ug.18333.18333.4	5.04e-05	R.LLPQINILQPIK[425.27]GESAR.R	YPR110C	2186.29	126.127	56026.3	127.13	11629.9	60663	7432.74	0.122525	8.16159
1	JL033021_040221_RPA2HFH_Q2_10to1_1ug.18409.18409.3	5.13e-15	K.VEGK[425.27]TPGLPIDLEIGYVPPSTR.G	YPR010C	2634.43	126.128	247112	127.131	47183.9	267596	28377.5	0.106046	9.42988
1	JL033021_040221_RPA2HFH_Q2_10to1_1ug.18432.18432.3	0.000133	R.LM[147.04]NAFVTIQNDVNAFIDSTK[425.27]AQGR.T	YOR341W	2965.5	126.127	156557	127.13	32163.3	169516	20411.1	0.120408	8.30508
1	JL033021_040221_RPA2HFH_Q2_10to1_1ug.18441.18441.4	2.96e-11	K.VEGK[425.27]TPGLPIDLEIGYVPPSTR.G	YPR010C	2634.43	126.127	34107.5	127.13	7096.54	36930.1	4542.59	0.123005	8.12974
0.9982	JL033021_040221_RPA2HFH_Q2_10to1_1ug.18442.18442.3	0.00262	R.K[407.26]WPTIDMPFSETGIQPDIIINPHAFPSR.M	YPR010C	3485.79	126.127	55807.8	127.13	13481	60410.8	9436	0.156197	6.40215
1	JL033021_040221_RPA2HFH_Q2_10to1_1ug.18448.18448.3	0.00502	R.LLPQINILQPIK[425.27]GESAR.R	YPR110C	2186.29	126.127	106036	127.131	22231.1	114810	14303.3	0.124582	8.02684
1	JL033021_040221_RPA2HFH_Q2_10to1_1ug.18457.18457.3	0.00111	R.LM[147.04]NAFVTIQNDVNAFIDSTK[425.27]AQGR.T	YOR341W	2965.5	126.126	178085	127.13	38317.4	192811	25073.1	0.130039	7.68998
1	JL033021_040221_RPA2HFH_Q2_10to1_1ug.18461.18461.4	6.03e-05	R.LM[147.04]NAFVTIQNDVNAFIDSTK[425.27]AQGR.T	YOR341W	2965.5	126.126	77131.2	127.13	16685.2	83508.9	10955.3	0.131187	7.6227
0.984	JL033021_040221_RPA2HFH_Q2_10to1_1ug.18495.18495.3	1.45e-05	K.DISSTLLNELK[425.27]SK.R	YOR341W	1743.97	126.127	59232.8	127.13	9334.01	64159.2	4684.65	0.0730161	13.6956
1	JL033021_040221_RPA2HFH_Q2_10to1_1ug.18514.18514.3	1.72e-05	K.K[425.27]AM[147.04]YTLSAQDEVFSLAFSPNR.Y	YMR116C	2687.33	126.127	121110	127.13	23862.1	131143	14697.8	0.112075	8.92261
1	JL033021_040221_RPA2HFH_Q2_10to1_1ug.18575.18575.3	3.18e-13	K.VEGK[425.27]TPGLPIDLEIGYVPPSTR.G	YPR010C	2634.43	126.127	116776	127.131	24457.1	126438	15724.5	0.124365	8.04085
1	JL033021_040221_RPA2HFH_Q2_10to1_1ug.18605.18605.4	2.65e-07	C.SRK[407.26]WPTIDMPFSETGIQPDIIINPHAFPSR.M	YPR010C	3728.92	126.127	72723.7	127.13	14764.1	78745	9292.34	0.118006	8.47418
1	JL033021_040221_RPA2HFH_Q2_10to1_1ug.18621.18621.3	1.63e-05	C.SRK[407.26]WPTIDM[147.04]PFSETGIQPDIIINPHAFPSR.M	YPR010C	3744.92	126.127	38793	127.13	9859.47	41988.6	7082.67	0.168681	5.92835
1	JL033021_040221_RPA2HFH_Q2_10to1_1ug.18662.18662.3	8.15e-11	R.K[425.27]NVEVVALNDPFISNDYSAYM[147.04]FK.Y	YJR009C	2976.47	126.127	98527.5	127.13	21455.9	106673	14146.7	0.132617	7.54049
1	JL033021_040221_RPA2HFH_Q2_10to1_1ug.18700.18700.4	9.3e-07	R.VNDIIK[407.26]PLVKEHDIDQLNVTLR.N	YBR279W	2850.6	126.127	72200.1	127.13	15143.3	78174	9745.64	0.124666	8.02143
1	JL033021_040221_RPA2HFH_Q2_10to1_1ug.18720.18720.4	1.18e-09	R.K[425.27]LVK[425.27]ADSFFM[147.04]DVLVVPPTR.F	YOR341W	2771.55	126.127	61044.6	127.13	14838.3	66078.7	10420.3	0.157695	6.34135
1	JL033021_040221_RPA2HFH_Q2_10to1_1ug.18740.18740.5	3.82e-08	R.TLYDK[425.27]VFDAHVVHQDENGSFLLYIDR.H	YGL009C	3390.7	126.127	47782.9	127.131	9516.31	51740.6	5907.9	0.114183	8.75786
1	JL033021_040221_RPA2HFH_Q2_10to1_1ug.18761.18761.4	1.82e-15	R.TLYDK[425.27]VFDAHVVHQDENGSFLLYIDR.H	YGL009C	3390.7	126.128	89687	127.131	16365.1	97127.9	9485.14	0.0976561	10.24
0.9994	JL033021_040221_RPA2HFH_Q2_10to1_1ug.18763.18763.3	0.0193	R.VDFK[425.27]NPHDIIEGINAGEIEIPEN.-	YDR418W,YEL054C	2859.44	126.127	95604.3	127.13	19984.7	103515	12832.6	0.123968	8.06658
1	JL033021_040221_RPA2HFH_Q2_10to1_1ug.18800.18800.5	1.6e-09	R.TLYDK[425.27]VFDAHVVHQDENGSFLLYIDR.H	YGL009C	3390.7	126.127	41378.4	127.131	9091.42	44798.7	6027.54	0.134547	7.43234
1	JL033021_040221_RPA2HFH_Q2_10to1_1ug.18805.18805.3	1.32e-07	R.GFTLAEVK[425.27]AAGLTAAYAR.T	YDL082W,YMR142C	2106.16	126.127	59426.3	127.13	13808.1	64332.2	9461.6	0.147074	6.79929
1	JL033021_040221_RPA2HFH_Q2_10to1_1ug.18831.18831.5	2.03e-10	R.VRNHFIFNVESAGAM[147.04]TPEEIFFK[425.27]SVR.L	YPR110C	3337.7	126.127	60083.1	127.13	15325.8	65032	11029	0.169594	5.89643
1	JL033021_040221_RPA2HFH_Q2_10to1_1ug.18860.18860.5	1.4e-10	R.VRNHFIFNVESAGAM[147.04]TPEEIFFK[425.27]SVR.L	YPR110C	3337.7	126.127	74073.3	127.13	19078.8	80172.9	13794.7	0.172061	5.81188
0.9998	JL033021_040221_RPA2HFH_Q2_10to1_1ug.18867.18867.4	0.0976	K.DISSTLLNELK[425.27]SK[425.27]R.S	YOR341W	2197.25	126.127	82351.3	127.13	14910.3	89184.6	8584.7	0.0962576	10.3888
1	JL033021_040221_RPA2HFH_Q2_10to1_1ug.18892.18892.4	4.54e-09	R.K[425.27]LVK[425.27]ADSFFM[147.04]DVLVVPPTR.F	YOR341W	2771.55	126.127	61849.8	127.13	13616.9	66962	9039.17	0.134989	7.40799
1	JL033021_040221_RPA2HFH_Q2_10to1_1ug.18907.18907.3	2.12e-08	R.K[425.27]PFLLPATELSTVQWSR.G	YML069W	2269.26	126.127	86053.4	127.13	18466.7	93170.1	12063.3	0.129476	7.72342
1	JL033021_040221_RPA2HFH_Q2_10to1_1ug.18916.18916.4	9.08e-08	R.K[425.27]LVK[425.27]ADSFFM[147.04]DVLVVPPTR.F	YOR341W	2771.55	126.127	53205	127.13	11033.1	57608.3	7046.48	0.122317	8.17547
0.9999	JL033021_040221_RPA2HFH_Q2_10to1_1ug.18922.18922.5	1.15e-05	R.IALSRPNVEVVALNDPFITNDYAAYM[147.04]FK[425.27]YDSTHGR.Y	YGR192C	4300.13	126.126	114618	127.13	23693.7	124104	15100.2	0.121673	8.21872
0.9996	JL033021_040221_RPA2HFH_Q2_10to1_1ug.18979.18979.5	0.000141	R.TLYDK[425.27]VFDAHVVHQDENGSFLLYIDR.H	YGL009C	3390.7	126.127	41604	127.131	7734.97	45054.5	4553.75	0.101072	9.89394
1	JL033021_040221_RPA2HFH_Q2_10to1_1ug.19094.19094.4	1.67e-09	K.GVC[160.03]SRK[407.26]WPTIDMPFSETGIQPDIIINPHAFPSR.M	YPR010C	4045.04	126.127	62125.5	127.13	11471.1	67278.7	6714.99	0.0998086	10.0192
1	JL033021_040221_RPA2HFH_Q2_10to1_1ug.19098.19098.4	1.16e-08	K.GVC[160.03]SRK[407.26]WPTIDMPFSETGIQPDIIINPHAFPSR.M	YPR010C	4045.04	126.127	57731.7	127.13	11229.7	62515.7	6850.76	0.109585	9.12537
1	JL033021_040221_RPA2HFH_Q2_10to1_1ug.19104.19104.4	2.06e-09	K.GVC[160.03]SRK[407.26]WPTIDMPFSETGIQPDIIINPHAFPSR.M	YPR010C	4045.04	126.126	60766.5	127.13	13065	65791.7	8545.07	0.129881	7.69937
1	JL033021_040221_RPA2HFH_Q2_10to1_1ug.19111.19111.4	4.84e-07	C.SRK[407.26]WPTIDMPFSETGIQPDIIINPHAFPSR.M	YPR010C	3728.92	126.127	74273.2	127.131	14938.8	80423.9	9340.46	0.11614	8.61027
1	JL033021_040221_RPA2HFH_Q2_10to1_1ug.19132.19132.3	1.54e-09	R.IVVGK[425.27]LNNVGTGSFDVLAK[425.27]VPNAA.-	YOR341W	2976.68	126.127	165621	127.131	30797.1	179358	18133.3	0.101101	9.89106
1	JL033021_040221_RPA2HFH_Q2_10to1_1ug.19136.19136.4	5.19e-11	R.IVVGK[425.27]LNNVGTGSFDVLAK[425.27]VPNAA.-	YOR341W	2976.68	126.127	72079.2	127.131	15502.3	78040	10141.3	0.12995	7.69529
0.9996	JL033021_040221_RPA2HFH_Q2_10to1_1ug.19143.19143.4	0.00173	P.EIAALNPDTLLISPGPGHPK[425.27]TDSGISRDC[160.03]IR.Y	YKL211C	3596.87	126.127	79145.5	127.131	16631.3	85693.8	10716.6	0.125058	7.99632
1	JL033021_040221_RPA2HFH_Q2_10to1_1ug.19164.19164.3	1.44e-14	R.IDSDK[425.27]LTDSAIDIVDSVR.T	YNL248C	2258.17	126.127	88144	127.13	16655.4	95452.2	9934.65	0.10408	9.60801
0.9965	JL033021_040221_RPA2HFH_Q2_10to1_1ug.19181.19181.4	0.13	R.HDGGFDLVHIK[425.27]DSLDNTFVTR.L	YHR203C,YJR145C	2682.35	126.127	35668.7	127.13	7855.66	38616.9	5215.9	0.135068	7.40369
1	JL033021_040221_RPA2HFH_Q2_10to1_1ug.19224.19224.3	2.77e-05	R.IVVGK[425.27]LNNVGTGSFDVLAK[425.27]VPNAA.-	YOR341W	2976.68	126.127	125905	127.13	25599.3	136329	16128.9	0.118308	8.45248
1	JL033021_040221_RPA2HFH_Q2_10to1_1ug.19237.19237.3	2.9e-08	K.DGFTK[425.27]IFETALNEK.Q	YOR341W	1908.99	126.127	43761.4	127.13	6511.98	47404.3	3049.53	0.0643303	15.5448
1	JL033021_040221_RPA2HFH_Q2_10to1_1ug.19263.19263.3	5.47e-06	R.NHFIFNVESAGAMTPEEIFFK[407.26]SVRI.L	YPR110C	3161.61	126.127	73830.7	127.13	13886.4	79952.7	8252.44	0.103217	9.68837
1	JL033021_040221_RPA2HFH_Q2_10to1_1ug.19266.19266.3	0.0258	K.STLEPVEQVLK[407.26]DAKISK.S	YDL229W,YNL209W	2163.22	126.127	56796	127.13	9874.83	61512.1	5482.95	0.0891362	11.2188
1	JL033021_040221_RPA2HFH_Q2_10to1_1ug.19269.19269.3	3.69e-06	R.NHFIFNVESAGAMTPEEIFFK[407.26]SVRI.L	YPR110C	3161.61	126.128	70895	127.131	14126.4	76767	8773.1	0.114282	8.75028
1	JL033021_040221_RPA2HFH_Q2_10to1_1ug.19297.19297.3	8.27e-07	R.NHFIFNVESAGAMTPEEIFFK[407.26]SVRI.L	YPR110C	3161.61	126.127	72999.7	127.131	16844.9	79027.1	11497.3	0.145485	6.87355
0.9903	JL033021_040221_RPA2HFH_Q2_10to1_1ug.19304.19304.3	5.92e-05	A.DK[425.27]VKLGRVRNHFIFNVESAGAM[147.04]TPEEIFFK.S	YPR110C	3791.99	126.127	37190	127.13	7782	40267.3	5000.39	0.12418	8.05283
0.9999	JL033021_040221_RPA2HFH_Q2_10to1_1ug.19312.19312.3	7.51e-05	R.NHFIFNVESAGAM[147.04]TPEEIFFK[425.27]SVRIL.K	YPR110C	3308.7	126.127	63911.9	127.13	13316.1	69200.7	8531.72	0.123289	8.111
0.959	JL033021_040221_RPA2HFH_Q2_10to1_1ug.19369.19369.3	0.000651	R.NHFIFNVESAGAMTPEEIFFK[407.26]SVRI.L	YPR110C	3161.61	126.127	73719.5	127.13	17378.3	79803.3	12004.3	0.150424	6.64789
1	JL033021_040221_RPA2HFH_Q2_10to1_1ug.19423.19423.3	6.76e-06	K.M[147.04]K[407.26]ETAESYLGAKVNDAVVTVPAYFNDSQR.Q	YAL005C,YLL024C	3497.72	126.127	65178.4	127.13	13154.2	70575.6	8244.6	0.116819	8.56022
1	JL033021_040221_RPA2HFH_Q2_10to1_1ug.19454.19454.4	6.15e-09	R.K[425.27]WPTIDM[147.04]PFSETGIQPDIIINPHAFPSR.M	YPR010C	3519.79	126.127	66471.3	127.13	14041.2	71970.4	9078.99	0.126149	7.92714
0.9779	JL033021_040221_RPA2HFH_Q2_10to1_1ug.19466.19466.3	0.00281	E.LSRAELEELEEFEFK[407.26]HGPMSLINDAM[147.04]VTR.T	YLR275W	3685.82	126.127	48406.5	127.13	10957.4	52405	7396.17	0.141135	7.08543
0.9992	JL033021_040221_RPA2HFH_Q2_10to1_1ug.19480.19480.3	0.00406	R.SK[425.27]IVTLPPTIFKPYPLWTGK.Q	YOR341W	2582.5	126.126	91819.2	127.13	20408.6	99406.9	13626.6	0.137079	7.29505
1	JL033021_040221_RPA2HFH_Q2_10to1_1ug.19484.19484.3	0.00101	K.DISSTLLNELKSK[407.26]R.S	YOR341W	1882.06	126.127	73441	127.131	13391.4	79534.1	7757.02	0.0975307	10.2532
1	JL033021_040221_RPA2HFH_Q2_10to1_1ug.19501.19501.3	2.1e-06	K.DNNLLGK[425.27]FELSGIPPAPR.G	YAL005C,YBL075C,YER103W,YLL024C	2234.21	126.127	68502	127.13	13920	74173.5	8766.81	0.118193	8.46073
1	JL033021_040221_RPA2HFH_Q2_10to1_1ug.19563.19563.3	0.000147	R.M[147.04]ILTHVDLIEK[425.27]FLR.Y	YOR210W	2040.15	126.128	84716.1	127.131	14360.2	91753.6	7782.92	0.0848241	11.7891
1	JL033021_040221_RPA2HFH_Q2_10to1_1ug.19572.19572.4	1.75e-07	R.M[147.04]ILTHVDLIEK[425.27]FLR.Y	YOR210W	2040.15	126.127	149476	127.13	27988.1	161871	16572.7	0.102382	9.76738
1	JL033021_040221_RPA2HFH_Q2_10to1_1ug.19582.19582.4	5.91e-06	R.SK[425.27]IVTLPPTIFKPYPLWTGK.Q	YOR341W	2582.5	126.127	23432.1	127.13	4783.11	25371.9	3021.93	0.119105	8.39594
0.999	JL033021_040221_RPA2HFH_Q2_10to1_1ug.19617.19617.4	0.0218	Y.C[160.03]C[160.03]RRM[147.04]ILTHVDLIEK[425.27]FLR.Y	YOR210W	2672.42	126.127	45356.3	127.13	8090.61	49120.8	4597.99	0.0936057	10.6831
1	JL033021_040221_RPA2HFH_Q2_10to1_1ug.19641.19641.3	8.45e-08	R.EIFDGIIGNDVK[425.27]DSFLTDR.L	YPR010C	2450.24	126.127	128540	127.13	25089.9	139191	15346.4	0.110254	9.06995
1	JL033021_040221_RPA2HFH_Q2_10to1_1ug.19644.19644.4	2.36e-15	R.K[425.27]WPTIDM[147.04]PFSETGIQPDIIINPHAFPSR.M	YPR010C	3519.79	126.127	95936.6	127.13	18729.6	103886	11457.8	0.110292	9.06682
1	JL033021_040221_RPA2HFH_Q2_10to1_1ug.19670.19670.5	6.19e-12	R.K[425.27]WPTIDM[147.04]PFSETGIQPDIIINPHAFPSR.M	YPR010C	3519.79	126.127	45460.7	127.13	8387.24	49231.6	4906.48	0.0996612	10.034
1	JL033021_040221_RPA2HFH_Q2_10to1_1ug.19676.19676.3	3.4e-08	R.K[425.27]WPTIDM[147.04]PFSETGIQPDIIINPHAFPSR.M	YPR010C	3519.79	126.127	53323.1	127.13	11594.4	57731.7	7637.38	0.132291	7.55909
1	JL033021_040221_RPA2HFH_Q2_10to1_1ug.19679.19679.6	4.28e-09	R.K[425.27]WPTIDM[147.04]PFSETGIQPDIIINPHAFPSR.M	YPR010C	3519.79	126.127	30323	127.13	5698.76	32837.4	3384.51	0.103069	9.70227
1	JL033021_040221_RPA2HFH_Q2_10to1_1ug.19687.19687.3	0.000496	K.ETAESYLGAK[425.27]VNDAVVTVPAYFNDSQR.Q	YAL005C,YLL024C	3240.6	126.126	72165.3	127.13	14327.5	78143	8874.61	0.113569	8.80523
1	JL033021_040221_RPA2HFH_Q2_10to1_1ug.19695.19695.3	0.000394	K.ETAESYLGAK[425.27]VNDAVVTVPAYFNDSQR.Q	YAL005C,YLL024C	3240.6	126.127	83374.7	127.13	18737.4	90262.9	12593.8	0.139524	7.16722
0.9999	JL033021_040221_RPA2HFH_Q2_10to1_1ug.19722.19722.3	0.0553	R.M[147.04]ILTHVDLIEK[425.27]FLR.Y	YOR210W	2040.15	126.126	51126.6	127.13	10437.1	55359.3	6594.39	0.11912	8.3949
0.9999	JL033021_040221_RPA2HFH_Q2_10to1_1ug.19741.19741.3	0.00258	R.TQVLQYLGDK[407.26]FR.V	YPR010C	1745.95	126.127	68081.3	127.131	13018.5	73724.8	7838.56	0.106322	9.4054
1	JL033021_040221_RPA2HFH_Q2_10to1_1ug.19780.19780.3	0.000628	M.ILK[425.27]EK[425.27]IDEYLQNIIAQVR.M	YPR010C	2779.6	126.127	88178.4	127.131	20520.9	95457.6	14073.8	0.147436	6.78263
0.9979	JL033021_040221_RPA2HFH_Q2_10to1_1ug.19825.19825.3	4.18e-08	R.GYFITQEEVELPLEDFK[425.27]AK.Y	YBR154C	2552.31	126.127	171776	127.13	33416.8	186011	20388	0.109607	9.12354
0.9947	JL033021_040221_RPA2HFH_Q2_10to1_1ug.19826.19826.3	6.03e-05	R.KDGFTK[407.26]IFETALNEK.Q	YOR341W	2019.08	126.127	42523.7	127.13	8325.45	46047	5103.93	0.110842	9.02188
0.9616	JL033021_040221_RPA2HFH_Q2_10to1_1ug.19868.19868.3	3.55e-05	K.TK[407.26]DNNLLGKFELSGIPPAPR.G	YAL005C,YBL075C,YER103W,YLL024C	2445.35	126.127	68236.9	127.131	14779.4	73879	9711.47	0.131451	7.60739
1	JL033021_040221_RPA2HFH_Q2_10to1_1ug.19901.19901.4	6.01e-07	K.DGFTK[425.27]IFETALNEK[425.27]QITNNR.V	YOR341W	2932.55	126.127	69614.2	127.131	13733.9	75381.2	8467.51	0.112329	8.90241
1	JL033021_040221_RPA2HFH_Q2_10to1_1ug.19906.19906.4	5.97e-12	R.NHFIFNVESAGAM[147.04]TPEEIFFK[425.27]SVR.L	YPR110C	3082.53	126.127	145829	127.13	29899.7	157901	18948.5	0.120003	8.33316
1	JL033021_040221_RPA2HFH_Q2_10to1_1ug.19907.19907.3	0.0003	R.NHFIFNVESAGAM[147.04]TPEEIFFK[425.27]SVR.L	YPR110C	3082.53	126.127	102123	127.13	23097	110559	15582.4	0.140942	7.09512
1	JL033021_040221_RPA2HFH_Q2_10to1_1ug.19911.19911.3	1.18e-05	R.AALYK[425.27]EVYNVIASDGSYVNYR.H	RPB1-msCTD,YDL140C	2691.36	126.127	92034.5	127.13	22533	99622.8	15883.7	0.159439	6.272
1	JL033021_040221_RPA2HFH_Q2_10to1_1ug.19996.19996.3	2.17e-12	K.K[425.27]SEVFSTYADNQPGVLIQVFEGER.T	YER103W,YLL024C	3009.52	126.127	96628.2	127.13	20857.2	104618	13675.6	0.130719	7.64999
1	JL033021_040221_RPA2HFH_Q2_10to1_1ug.20010.20010.3	8.78e-12	K.K[425.27]SEVFSTYADNQPGVLIQVFEGER.T	YER103W,YLL024C	3009.52	126.127	99575.5	127.13	21207.7	107812	13786.6	0.127876	7.82006
1	JL033021_040221_RPA2HFH_Q2_10to1_1ug.20018.20018.4	1.79e-09	K.K[425.27]SEVFSTYADNQPGVLIQVFEGER.T	YER103W,YLL024C	3009.52	126.127	38960.6	127.13	8173.5	42184.2	5260.97	0.124714	8.01833
1	JL033021_040221_RPA2HFH_Q2_10to1_1ug.20043.20043.3	3.98e-08	R.VNENIGSK[425.27]M[147.04]QYFLSTGNLVSQSGLDLQQVSGYTVVAEK.L	YPR010C	4416.22	126.127	25821	127.13	5670.6	27955.4	3758.49	0.134446	7.43793
1	JL033021_040221_RPA2HFH_Q2_10to1_1ug.20068.20068.4	2.03e-05	R.NHFIFNVESAGAM[147.04]TPEEIFFK[425.27]SVR.L	YPR110C	3082.53	126.127	52539.7	127.13	13267.1	56868.4	9500.13	0.167055	5.98606
1	JL033021_040221_RPA2HFH_Q2_10to1_1ug.20079.20079.4	3.68e-13	R.VNENIGSK[425.27]M[147.04]QYFLSTGNLVSQSGLDLQQVSGYTVVAEK.L	YPR010C	4416.22	126.127	55460.6	127.131	12698.4	60040.7	8628.55	0.143712	6.95838
0.9977	JL033021_040221_RPA2HFH_Q2_10to1_1ug.20139.20139.3	1.11e-10	R.KLVK[407.26]ADSFFM[147.04]DVLVVPPTR.F	YOR341W	2456.36	126.127	91631.6	127.131	21102.3	99197.7	14386.8	0.145032	6.89505
1	JL033021_040221_RPA2HFH_Q2_10to1_1ug.20150.20150.4	6.06e-10	R.VNENIGSK[425.27]M[147.04]QYFLSTGNLVSQSGLDLQQVSGYTVVAEK.L	YPR010C	4416.22	126.127	56134.5	127.13	13250.5	60766.9	9159.65	0.150734	6.6342
1	JL033021_040221_RPA2HFH_Q2_10to1_1ug.20167.20167.3	5.13e-07	R.VNENIGSK[425.27]M[147.04]QYFLSTGNLVSQSGLDLQQVSGYTVVAEK.L	YPR010C	4416.22	126.127	20581.3	127.13	4374.52	22283.7	2840.02	0.127448	7.84633
1	JL033021_040221_RPA2HFH_Q2_10to1_1ug.20291.20291.3	1.03e-11	K.VTK[425.27]TIAQDSFDILSFDDSNTLIR.K	YBL017C	2895.49	126.126	100502	127.13	22558.5	108805	15150.9	0.139248	7.18143
0.9996	JL033021_040221_RPA2HFH_Q2_10to1_1ug.20302.20302.3	2.09e-15	R.KLVK[407.26]ADSFFM[147.04]DVLVVPPTR.F	YOR341W	2456.36	126.127	137515	127.131	28813.8	148893	18531.2	0.12446	8.0347
1	JL033021_040221_RPA2HFH_Q2_10to1_1ug.20322.20322.3	5.59e-16	K.VTK[425.27]TIAQDSFDILSFDDSNTLIR.K	YBL017C	2895.49	126.127	133902	127.131	27971.1	144982	17952.6	0.123826	8.07586
1	JL033021_040221_RPA2HFH_Q2_10to1_1ug.20407.20407.3	4.5e-05	R.LDQQIIIDK[425.27]LIPIANK.G	YGL009C	2131.27	126.127	54381.7	127.13	11516	58880.4	7458.32	0.126669	7.89459
0.9956	JL033021_040221_RPA2HFH_Q2_10to1_1ug.20462.20462.3	1.8e-08	R.KLVK[407.26]ADSFFM[147.04]DVLVVPPTR.F	YOR341W	2456.36	126.127	68766	127.13	14993.5	74451.1	9893.48	0.132886	7.52527
0.9797	JL033021_040221_RPA2HFH_Q2_10to1_1ug.20549.20549.3	4.03e-10	R.YWK[407.26]VEGKTPGLPIDLEIGYVPPSTR.G	YPR010C	3093.66	126.127	95888.2	127.131	21337.1	103812	14256.3	0.137328	7.28184
0.9924	JL033021_040221_RPA2HFH_Q2_10to1_1ug.20578.20578.3	5.56e-11	R.YWKVEGK[407.26]TPGLPIDLEIGYVPPSTR.G	YPR010C	3093.66	126.127	94660.7	127.13	18925.7	102501	11782.5	0.11495	8.6994
0.9541	JL033021_040221_RPA2HFH_Q2_10to1_1ug.20593.20593.3	1.69e-05	R.LQVKTLENNVK[407.26]QFGVPYFGM[147.04]SDAR.Q	YGL009C	3035.56	126.126	92777.9	127.13	21355.8	100439	14555.6	0.14492	6.90036
0.986	JL033021_040221_RPA2HFH_Q2_10to1_1ug.20598.20598.3	3.15e-08	R.LQVK[407.26]TLENNVKQFGVPYFGM[147.04]SDAR.Q	YGL009C	3035.56	126.126	95118.5	127.13	22293.5	102969	15350.3	0.149076	6.70798
1	JL033021_040221_RPA2HFH_Q2_10to1_1ug.20602.20602.3	0.000347	R.VLDEVVVDNFDQK[425.27]LGVDIIR.K	YLR259C	2582.4	126.127	81180.4	127.13	19203.9	87879.4	13290.7	0.151238	6.61208
1	JL033021_040221_RPA2HFH_Q2_10to1_1ug.20624.20624.3	1.1e-06	R.QAVINGPDK[425.27]WPGATQIQNEDGSLVSLIGM[147.04]SVEQR.K	YOR341W	3949.99	126.127	37740.2	127.13	8128.04	40861.1	5321.82	0.130242	7.67803
1	JL033021_040221_RPA2HFH_Q2_10to1_1ug.20649.20649.3	1.76e-06	R.QAVINGPDK[425.27]WPGATQIQNEDGSLVSLIGM[147.04]SVEQR.K	YOR341W	3949.99	126.126	46242.4	127.13	9279.23	50072	5792.14	0.115676	8.64481
0.9999	JL033021_040221_RPA2HFH_Q2_10to1_1ug.20680.20680.4	0.00548	K.LSNSMNEVVQITSVLTM[147.04]IK[425.27]PFK[425.27].L	YKL038W	3088.67	126.127	68465.7	127.13	12346	74147.2	7083.41	0.0955317	10.4677
1	JL033021_040221_RPA2HFH_Q2_10to1_1ug.20736.20736.4	5.41e-05	R.SVSEIEIESVQDQPSVAVGSFFK[425.27]GFR.A	YNL248C	3138.6	126.126	57040	127.13	11867.6	61760.4	7596.42	0.122998	8.13019
1	JL033021_040221_RPA2HFH_Q2_10to1_1ug.20742.20742.3	2.51e-09	R.SVSEIEIESVQDQPSVAVGSFFK[425.27]GFR.A	YNL248C	3138.6	126.127	142486	127.13	30485.6	154270	19876.4	0.128842	7.76146
1	JL033021_040221_RPA2HFH_Q2_10to1_1ug.20753.20753.4	3.65e-06	R.SVSEIEIESVQDQPSVAVGSFFK[425.27]GFR.A	YNL248C	3138.6	126.126	54950.2	127.13	11888.6	59493.8	7806.56	0.131216	7.621
1	JL033021_040221_RPA2HFH_Q2_10to1_1ug.20772.20772.4	0.000977	R.SVSEIEIESVQDQPSVAVGSFFK[425.27]GFR.A	YNL248C	3138.6	126.127	53705.9	127.13	10607.6	58155	6545.53	0.112553	8.88469
1	JL033021_040221_RPA2HFH_Q2_10to1_1ug.20774.20774.4	0.00211	R.QAVINGPDK[425.27]WPGATQIQNEDGSLVSLIGM[147.04]SVEQR.K	YOR341W	3949.99	126.127	67076	127.13	15365.7	72615.2	10444	0.143827	6.95278
1	JL033021_040221_RPA2HFH_Q2_10to1_1ug.20788.20788.4	2.13e-07	R.NHFIFNVESAGAM[147.04]TPEEIFFK[407.26]SVR.L	YPR110C	3064.52	126.127	59106.1	127.13	11868.7	64000.9	7412.17	0.115813	8.63457
1	JL033021_040221_RPA2HFH_Q2_10to1_1ug.20818.20818.3	2.3e-09	K.TLLAK[425.27]AVATEVSANFISVK.G	YDL126C	2258.3	126.127	52679.3	127.13	11105.1	57037.5	7170.88	0.125722	7.95405
1	JL033021_040221_RPA2HFH_Q2_10to1_1ug.20841.20841.3	2.1e-07	K.TLLAK[425.27]AVATEVSANFISVK.G	YDL126C	2258.3	126.127	47738.9	127.13	10265.3	51686.8	6714.44	0.129906	7.69785
1	JL033021_040221_RPA2HFH_Q2_10to1_1ug.20846.20846.3	3e-07	R.FLEQQNQVLQTK[425.27]WELLQQVDTSTR.T	K2C1_HUMAN	3228.69	126.127	95122.9	127.13	19515.7	102997	12373.2	0.120132	8.32417
1	JL033021_040221_RPA2HFH_Q2_10to1_1ug.20853.20853.3	3.47e-06	R.FLEQQNQVLQTK[425.27]WELLQQVDTSTR.T	K2C1_HUMAN	3228.69	126.127	91089.4	127.13	20018.1	98618.7	13273.7	0.134596	7.42964
1	JL033021_040221_RPA2HFH_Q2_10to1_1ug.21028.21028.3	2.66e-13	K.EK[425.27]IDEYLQNIIAQVR.M	YPR010C	2128.16	126.127	50548	127.131	11645.6	54721.7	7941.34	0.145122	6.89074
0.999	JL033021_040221_RPA2HFH_Q2_10to1_1ug.21054.21054.5	4.24e-05	R.FRLPSK[425.27]LGEEVHENSQNQLLSK[425.27]VLTTSLLIR.D	YOR341W	4143.32	126.127	88378.2	127.13	19996.7	95678.7	13494.1	0.141036	7.09041
1	JL033021_040221_RPA2HFH_Q2_10to1_1ug.21063.21063.6	2.84e-12	R.FRLPSK[425.27]LGEEVHENSQNQLLSK[425.27]VLTTSLLIR.D	YOR341W	4143.32	126.127	86418.5	127.13	19766	93555.3	13422.8	0.143475	6.96987
1	JL033021_040221_RPA2HFH_Q2_10to1_1ug.21074.21074.5	8.41e-10	R.FRLPSK[425.27]LGEEVHENSQNQLLSK[425.27]VLTTSLLIR.D	YOR341W	4143.32	126.127	148605	127.13	32890.5	160887	21904.2	0.136146	7.34505
1	JL033021_040221_RPA2HFH_Q2_10to1_1ug.21078.21078.6	1.27e-12	R.FRLPSK[425.27]LGEEVHENSQNQLLSK[425.27]VLTTSLLIR.D	YOR341W	4143.32	126.127	112332	127.13	26043.9	121606	17823.8	0.14657	6.82267
1	JL033021_040221_RPA2HFH_Q2_10to1_1ug.21141.21141.5	4.08e-11	R.LPSK[425.27]LGEEVHENSQNQLLSK[425.27]VLTTSLLIR.D	YOR341W	3840.15	126.127	80214.7	127.13	20908.6	86818.1	15204.2	0.175127	5.71014
0.9841	JL033021_040221_RPA2HFH_Q2_10to1_1ug.21159.21159.3	7.04e-05	K.IVTLPPTIFK[425.27]PYPLWTGK.Q	YOR341W	2367.37	126.127	71723.5	127.13	17149.8	77640.6	11938.6	0.153768	6.5033
1	JL033021_040221_RPA2HFH_Q2_10to1_1ug.21160.21160.6	5.58e-07	R.FRLPSK[425.27]LGEEVHENSQNQLLSK[425.27]VLTTSLLIR.D	YOR341W	4143.32	126.126	46734.8	127.13	12440.8	50579.9	9135.86	0.180622	5.53642
0.9995	JL033021_040221_RPA2HFH_Q2_10to1_1ug.21217.21217.3	0.00119	V.INGPDK[425.27]WPGATQIQNEDGSLVSLIGM[147.04]SVEQR.K	YOR341W	3651.83	126.127	62575.6	127.13	13848	67747.2	9221.65	0.136119	7.34654
1	JL033021_040221_RPA2HFH_Q2_10to1_1ug.21229.21229.4	3.65e-11	R.IVSLPK[425.27]ADDIHHLLVLAIEPPLR.Q	YML069W	2855.67	126.127	31817	127.13	8348.43	34435.8	6089.72	0.176843	5.65474
1	JL033021_040221_RPA2HFH_Q2_10to1_1ug.21237.21237.4	1.66e-11	R.IVSLPK[425.27]ADDIHHLLVLAIEPPLR.Q	YML069W	2855.67	126.127	30627.9	127.13	6360.86	33162.6	4066.64	0.122627	8.15479
1	JL033021_040221_RPA2HFH_Q2_10to1_1ug.21245.21245.4	1.42e-09	R.IFSPYGHIM[147.04]QINIK[425.27]NAFGFIQFDNPQSVR.D	YPL190C	3693.88	126.127	67378	127.13	14891.9	72946.7	9909.21	0.135842	7.3615
0.9993	JL033021_040221_RPA2HFH_Q2_10to1_1ug.21254.21254.4	0.0174	R.NHFIFNVESAGAM[147.04]TPEEIFFK[425.27]SVR.L	YPR110C	3082.53	126.127	59543.3	127.13	14161.1	64456.2	9829.41	0.152498	6.55748
1	JL033021_040221_RPA2HFH_Q2_10to1_1ug.21279.21279.4	0.000566	R.NHFIFNVESAGAM[147.04]TPEEIFFK[425.27]SVR.L	YPR110C	3082.53	126.127	65186.1	127.13	14686.7	70571.3	9886.1	0.140087	7.13844
1	JL033021_040221_RPA2HFH_Q2_10to1_1ug.21280.21280.5	9.95e-13	R.IVSLPK[425.27]ADDIHHLLVLAIEPPLR.Q	YML069W	2855.67	126.127	17715.4	127.13	3465.31	19183.3	2123	0.110669	9.03592
1	JL033021_040221_RPA2HFH_Q2_10to1_1ug.21289.21289.4	1.21e-05	R.NSTIPTKK[407.26]SETFSTYADNQPGVLIQVFEGER.T	YBL075C	3734.89	126.126	68087.6	127.13	15402.5	73712	10392.6	0.140989	7.09273
1	JL033021_040221_RPA2HFH_Q2_10to1_1ug.21302.21302.4	6.59e-12	K.YGIVHSLHEVYGPEVAAK[425.27]VLSVLGR.L	YOR341W	2989.65	126.127	64313.4	127.13	12208.4	69645.3	7308.66	0.104941	9.52915
1	JL033021_040221_RPA2HFH_Q2_10to1_1ug.21320.21320.5	1.68e-12	K.YGIVHSLHEVYGPEVAAK[425.27]VLSVLGR.L	YOR341W	2989.65	126.128	52136.2	127.131	9177.49	56464.5	5154.01	0.0912788	10.9554
1	JL033021_040221_RPA2HFH_Q2_10to1_1ug.21384.21384.5	7.57e-10	R.IVSLPK[425.27]ADDIHHLLVLAIEPPLR.Q	YML069W	2855.67	126.127	12505	127.13	3346.66	13533.7	2463.6	0.182034	5.49348
0.9803	JL033021_040221_RPA2HFH_Q2_10to1_1ug.21403.21403.3	3e-06	R.LDQQIIIDK[407.26]LIPIANKGGK.L	YGL009C	2355.4	126.127	79398.7	127.13	15971.8	85973.9	9987.23	0.116166	8.60838
1	JL033021_040221_RPA2HFH_Q2_10to1_1ug.21413.21413.3	0.000309	S.QFSNLK[425.27]VVTTTADDAFPSSLR.A	YJR063W	2593.35	126.127	71649.1	127.131	15830.8	77570.8	10531.9	0.135771	7.36533
1	JL033021_040221_RPA2HFH_Q2_10to1_1ug.21430.21430.3	4.81e-06	S.QFSNLK[425.27]VVTTTADDAFPSSLR.A	YJR063W	2593.35	126.127	65327	127.13	17299.5	70702.6	12673.2	0.179247	5.5789
1	JL033021_040221_RPA2HFH_Q2_10to1_1ug.21462.21462.4	6.5e-11	K.YGIVHSLHEVYGPEVAAK[425.27]VLSVLGR.L	YOR341W	2989.65	126.127	39437.5	127.13	9134.71	42693.4	6248.18	0.14635	6.83294
1	JL033021_040221_RPA2HFH_Q2_10to1_1ug.21504.21504.4	7.44e-19	K.LGEEVHENSQNQLLSK[425.27]VLTTSLLIR.D	YOR341W	3117.71	126.126	73533.8	127.13	14092.8	79629	8500.27	0.106748	9.36783
0.9917	JL033021_040221_RPA2HFH_Q2_10to1_1ug.21602.21602.5	5.45e-16	R.FINPPKDK[425.27]SAFPLLQEAVQPHIGSFNALTEGPDGGLLNLGVK.D	YPR010C	4725.53	126.127	73028.5	127.13	17659.8	79051.6	12368	0.156454	6.39165
1	JL033021_040221_RPA2HFH_Q2_10to1_1ug.21605.21605.6	4.29e-06	K.LVPSIPPATIETFNEAALVVNITHHELVPK[425.27]HIR.L	YBR154C	3952.2	126.127	43866.4	127.13	7482.09	47510.1	4079.66	0.0858694	11.6456
0.9782	JL033021_040221_RPA2HFH_Q2_10to1_1ug.21609.21609.3	2.61e-07	K.IQGLEGIILTNIVSNSDKVAENK[407.26]EDK.Q	YBL017C	3105.66	126.126	100585	127.13	24450.9	108880	17171.3	0.157709	6.3408
1	JL033021_040221_RPA2HFH_Q2_10to1_1ug.21627.21627.6	1.22e-07	K.LVPSIPPATIETFNEAALVVNITHHELVPK[425.27]HIR.L	YBR154C	3952.2	126.127	57364.7	127.13	9674.36	62130.5	5217.07	0.0839696	11.9091
1	JL033021_040221_RPA2HFH_Q2_10to1_1ug.21636.21636.6	8.55e-10	K.SQYGASK[425.27]YGIVHSLHEVYGPEVAAK[425.27]VLSVLGR.L	YOR341W	4008.16	126.127	38045.2	127.13	7340.53	41198.3	4450.55	0.108027	9.25691
0.9969	JL033021_040221_RPA2HFH_Q2_10to1_1ug.21647.21647.5	0.000665	K.LVPSIPPATIETFNEAALVVNITHHELVPK[425.27]HIR.L	YBR154C	3952.2	126.127	55820.1	127.13	13285.4	60425.7	9225.21	0.15267	6.55006
1	JL033021_040221_RPA2HFH_Q2_10to1_1ug.21654.21654.5	8.39e-10	K.SQYGASK[425.27]YGIVHSLHEVYGPEVAAK[425.27]VLSVLGR.L	YOR341W	4008.16	126.127	69356.2	127.13	16681.3	75077.2	11649	0.155161	6.44492
1	JL033021_040221_RPA2HFH_Q2_10to1_1ug.21681.21681.5	2.17e-06	K.M[147.04]SPYELVQHKEESDEIGGYFIVNGIEK[425.27]LIR.M	YPR010C	3805.93	126.127	57081.9	127.13	13779.3	61790	9641.22	0.156032	6.40894
1	JL033021_040221_RPA2HFH_Q2_10to1_1ug.21688.21688.6	6.29e-11	K.SQYGASK[425.27]YGIVHSLHEVYGPEVAAK[425.27]VLSVLGR.L	YOR341W	4008.16	126.127	47548.1	127.13	8524.51	51494.2	4866.18	0.0944996	10.5821
1	JL033021_040221_RPA2HFH_Q2_10to1_1ug.21918.21918.3	0.00508	K.IITHPNFNGNTLDNDIM[147.04]LIK[425.27]LSSPATLNSR.V	TRYP_PIG	3621.89	126.127	54369.5	127.13	11921.6	58863.7	7894.09	0.134108	7.45669
0.982	JL033021_040221_RPA2HFH_Q2_10to1_1ug.21955.21955.5	1.67e-09	R.VPIALYVSLAPM[147.04]YLENPLQGVM[147.04]K[425.27]QHLNPLVM[147.04]K.Y	YOR340C	3951.12	126.126	41469.2	127.13	9624.8	44892.7	6590.95	0.146816	6.81126
0.9847	JL033021_040221_RPA2HFH_Q2_10to1_1ug.21970.21970.5	3.09e-08	R.VPIALYVSLAPM[147.04]YLENPLQGVM[147.04]K[425.27]QHLNPLVM[147.04]K.Y	YOR340C	3951.12	126.127	45980.9	127.13	10140.5	49781.3	6738.58	0.135364	7.3875
1	JL033021_040221_RPA2HFH_Q2_10to1_1ug.22271.22271.3	5.82e-07	R.DLGFGTILNFTTK[425.27]IGAGM[147.04]GEQM[147.04]LSR.E	YGR032W,YLR342W	2985.5	126.127	87551.7	127.13	19624.1	94785.4	13169.1	0.138936	7.19756
1	JL033021_040221_RPA2HFH_Q2_10to1_1ug.22277.22277.3	8.27e-07	R.DLGFGTILNFTTK[425.27]IGAGM[147.04]GEQM[147.04]LSR.E	YGR032W,YLR342W	2985.5	126.127	87181.6	127.13	20601.7	94376	14249.8	0.15099	6.62296
0.9976	JL033021_040221_RPA2HFH_Q2_10to1_1ug.22338.22338.4	0.00162	R.QAVINGPDK[407.26]WPGATQIQNEDGSLVSLIGM[147.04]SVEQR.K	YOR341W	3931.98	126.127	61596.7	127.13	15195	66674.4	10752.9	0.161275	6.20058
0.995	JL033021_040221_RPA2HFH_Q2_10to1_1ug.22339.22339.3	0.0102	R.QAVINGPDK[407.26]WPGATQIQNEDGSLVSLIGM[147.04]SVEQR.K	YOR341W	3931.98	126.127	37889.8	127.13	9849.78	41009.1	7153.38	0.174434	5.73283
1	JL033021_040221_RPA2HFH_Q2_10to1_1ug.22402.22402.3	0.000328	R.QAVINGPDK[407.26]WPGATQIQNEDGSLVSLIGM[147.04]SVEQR.K	YOR341W	3931.98	126.126	40039.6	127.129	9868.03	43340.3	6979.93	0.161049	6.20928
0.9993	JL033021_040221_RPA2HFH_Q2_10to1_1ug.22404.22404.3	0.000161	L.SAK[425.27]QITNPTVLDNLGHPVSGGLYDLALGAFLR.N	YOR341W	3633.96	126.127	47360.2	127.13	11552.7	51265.4	8128.05	0.158548	6.30722
1	JL033021_040221_RPA2HFH_Q2_10to1_1ug.22406.22406.4	2.78e-07	L.SAK[425.27]QITNPTVLDNLGHPVSGGLYDLALGAFLR.N	YOR341W	3633.96	126.127	44148.8	127.131	10140.1	47794.4	6902.55	0.144422	6.92417
1	JL033021_040221_RPA2HFH_Q2_10to1_1ug.22407.22407.4	8.59e-06	R.QAVINGPDK[407.26]WPGATQIQNEDGSLVSLIGM[147.04]SVEQR.K	YOR341W	3931.98	126.127	63673.1	127.131	15442.7	68924.2	10832	0.157158	6.36302
1	JL033021_040221_RPA2HFH_Q2_10to1_1ug.22409.22409.4	6.98e-07	L.SAK[425.27]QITNPTVLDNLGHPVSGGLYDLALGAFLR.N	YOR341W	3633.96	126.128	41712.1	127.131	11055.9	45144.3	8102.66	0.179484	5.57154
1	JL033021_040221_RPA2HFH_Q2_10to1_1ug.22436.22436.4	1.23e-07	K.VLLSEVIDK[425.27]VIVTETTGTSNTAGGNAAR.S	YOR341W	3112.67	126.126	26236.7	127.13	6713.52	28397.6	4838.74	0.170393	5.8688
1	JL033021_040221_RPA2HFH_Q2_10to1_1ug.22478.22478.3	4.35e-08	K.VLLSEVIDK[425.27]VIVTETTGTSNTAGGNAAR.S	YOR341W	3112.67	126.127	82881.8	127.13	19344.8	89723.3	13289	0.148111	6.75167
0.99	JL033021_040221_RPA2HFH_Q2_10to1_1ug.22542.22542.4	0.00336	R.QAVINGPDK[407.26]WPGATQIQNEDGSLVSLIGM[147.04]SVEQR.K	YOR341W	3931.98	126.127	57385.5	127.13	14461	62113.6	10344.5	0.166541	6.00451
1	JL033021_040221_RPA2HFH_Q2_10to1_1ug.22682.22682.3	0.000652	R.DLTDYLM[147.04]K[425.27]ILSER.G	YFL039C	1908.99	126.127	18105.2	127.13	3867.53	19602.7	2519.02	0.128504	7.78189
1	JL033021_040221_RPA2HFH_Q2_10to1_1ug.22706.22706.4	7.81e-09	R.NLSAK[425.27]QITNPTVLDNLGHPVSGGLYDLALGAFLR.N	YOR341W	3861.09	126.127	57908.2	127.13	14103	62683.4	9913.97	0.158159	6.32274
0.9979	JL033021_040221_RPA2HFH_Q2_10to1_1ug.22714.22714.4	5.29e-08	N.EWNVEKFK[425.27]KDFEVNISSLDAREANFDLINIDTSIANAFR.R	YPR110C	4855.45	126.127	32435.9	127.13	10142.8	35092.2	7957.02	0.226746	4.41022
0.9513	JL033021_040221_RPA2HFH_Q2_10to1_1ug.22720.22720.4	0.14	K.KDLKIEEIIDKTFALC[160.03]AASAAISYMEEIISK[425.27]SSRNLNAFR.K	YFL003C	4842.54	126.127	34558.8	127.13	9273.6	37401.5	6834.98	0.182746	5.47207
1	JL033021_040221_RPA2HFH_Q2_10to1_1ug.22782.22782.4	1.1e-11	K.DK[425.27]SAFPLLQEAVQPHIGSFNALTEGPDGGLLNLGVK.D	YPR010C	4029.13	126.127	60341.6	127.13	14696.3	65317.5	10331.3	0.15817	6.32231
1	JL033021_040221_RPA2HFH_Q2_10to1_1ug.22802.22802.4	0.00164	R.NLSAK[407.26]QITNPTVLDNLGHPVSGGLYDLALGAFLR.N	YOR341W	3843.08	126.126	53526.7	127.129	12505.6	57945	8595.56	0.14834	6.74127
1	JL033021_040221_RPA2HFH_Q2_10to1_1ug.22803.22803.3	1.98e-19	K.VLLSEVIDK[425.27]VIVTETTGTSNTAGGNAAR.S	YOR341W	3112.67	126.126	70041.5	127.13	19814.2	75794.6	14944.7	0.197173	5.07168
1	JL033021_040221_RPA2HFH_Q2_10to1_1ug.22806.22806.4	1.7e-11	K.VLLSEVIDK[425.27]VIVTETTGTSNTAGGNAAR.S	YOR341W	3112.67	126.126	22854.1	127.13	6210.51	24733.4	4603.39	0.186121	5.37286
1	JL033021_040221_RPA2HFH_Q2_10to1_1ug.22810.22810.3	3.02e-20	K.VLLSEVIDK[425.27]VIVTETTGTSNTAGGNAAR.S	YOR341W	3112.67	126.127	68260.4	127.13	17645.5	73880.9	12780.6	0.17299	5.7807
1	JL033021_040221_RPA2HFH_Q2_10to1_1ug.22825.22825.4	4.4e-16	K.VLLSEVIDK[425.27]VIVTETTGTSNTAGGNAAR.S	YOR341W	3112.67	126.127	36599.5	127.13	8123.2	39624.1	5419.04	0.136761	7.31201
1	JL033021_040221_RPA2HFH_Q2_10to1_1ug.22941.22941.4	1.08e-15	R.NLSAK[425.27]QITNPTVLDNLGHPVSGGLYDLALGAFLR.N	YOR341W	3861.09	126.127	64869.8	127.131	18285.1	70198.6	13770.4	0.196164	5.09779
1	JL033021_040221_RPA2HFH_Q2_10to1_1ug.22959.22959.5	1.92e-08	R.NLSAK[425.27]QITNPTVLDNLGHPVSGGLYDLALGAFLR.N	YOR341W	3861.09	126.127	29276.9	127.13	6947.63	31692.6	4816.68	0.151981	6.57976
1	JL033021_040221_RPA2HFH_Q2_10to1_1ug.22972.22972.3	4.44e-09	K.VLLSEVIDK[425.27]VIVTETTGTSNTAGGNAAR.S	YOR341W	3112.67	126.127	72443	127.13	18135.1	78412.7	12929.8	0.164894	6.06449
0.9999	JL033021_040221_RPA2HFH_Q2_10to1_1ug.22973.22973.5	1.91e-06	R.FINPPK[407.26]DKSAFPLLQEAVQPHIGSFNALTEGPDGGLLNLGVK.D	YPR010C	4707.51	126.126	50656.7	127.13	13498.8	54824.4	9917.48	0.180895	5.52805
1	JL033021_040221_RPA2HFH_Q2_10to1_1ug.22975.22975.3	0.00348	K.K[425.27]LFDDVIALINSAGK.T	YGL207W	1900.08	126.127	14855.4	127.13	3549.73	16081	2470.22	0.153611	6.50994
1	JL033021_040221_RPA2HFH_Q2_10to1_1ug.22986.22986.3	1.09e-06	K.VLLSEVIDK[425.27]VIVTETTGTSNTAGGNAAR.S	YOR341W	3112.67	126.127	76062	127.13	19257.7	82328.2	13807.9	0.167718	5.96238
1	JL033021_040221_RPA2HFH_Q2_10to1_1ug.23008.23008.4	7.06e-06	K.VLLSEVIDK[425.27]VIVTETTGTSNTAGGNAAR.S	YOR341W	3112.67	126.127	36939.9	127.13	8781.49	39987.8	6093.88	0.152394	6.56195
0.9961	JL033021_040221_RPA2HFH_Q2_10to1_1ug.23024.23024.3	0.023	K.VLLSEVIDK[425.27]VIVTETTGTSNTAGGNAAR.S	YOR341W	3112.67	126.127	69847	127.13	19285.2	75588	14395.3	0.190444	5.25088
0.994	JL033021_040221_RPA2HFH_Q2_10to1_1ug.23029.23029.4	0.000137	R.NLSAK[407.26]QITNPTVLDNLGHPVSGGLYDLALGAFLR.N	YOR341W	3843.08	126.127	44813.8	127.13	10974.9	48508.8	7737.46	0.159506	6.26934
0.9995	JL033021_040221_RPA2HFH_Q2_10to1_1ug.23032.23032.4	1.59e-09	D.PNIETNEIGVPPVFAVK[425.27]LTYPEPVTAYNIAELR.Q	YOR341W	3951.11	126.127	52117.4	127.13	13318.5	56409.9	9593.09	0.17006	5.88027
1	JL033021_040221_RPA2HFH_Q2_10to1_1ug.23036.23036.3	8.21e-05	R.NLSAK[425.27]QITNPTVLDNLGHPVSGGLYDLALGAFLR.N	YOR341W	3861.09	126.127	53651.1	127.13	13651.9	58070.5	9812.71	0.168979	5.91788
1	JL033021_040221_RPA2HFH_Q2_10to1_1ug.23055.23055.3	5.91e-05	D.PNIETNEIGVPPVFAVK[425.27]LTYPEPVTAYNIAELR.Q	YOR341W	3951.11	126.127	51557.8	127.13	11899	55814.8	8122.29	0.145522	6.87181
1	JL033021_040221_RPA2HFH_Q2_10to1_1ug.23063.23063.4	1.45e-15	D.PNIETNEIGVPPVFAVK[425.27]LTYPEPVTAYNIAELR.Q	YOR341W	3951.11	126.127	62263.7	127.131	16616.5	67386.1	12216.4	0.181289	5.51604
1	JL033021_040221_RPA2HFH_Q2_10to1_1ug.23078.23078.4	2.86e-07	R.NLSAK[407.26]QITNPTVLDNLGHPVSGGLYDLALGAFLR.N	YOR341W	3843.08	126.127	50417	127.13	13238.1	54566.6	9659.62	0.177024	5.64894
1	JL033021_040221_RPA2HFH_Q2_10to1_1ug.23101.23101.3	0.000144	R.IPNFLTIDPIPFDPPSFEAK[425.27]VNER.A	YOR123C	3052.6	126.127	78850.7	127.13	20223.7	85344.5	14592.6	0.170985	5.84846
1	JL033021_040221_RPA2HFH_Q2_10to1_1ug.23106.23106.4	1.65e-10	R.NLSAK[425.27]QITNPTVLDNLGHPVSGGLYDLALGAFLR.N	YOR341W	3861.09	126.127	45837	127.13	11996.7	49610	8740.52	0.176185	5.67586
1	JL033021_040221_RPA2HFH_Q2_10to1_1ug.23113.23113.4	3.74e-09	D.PNIETNEIGVPPVFAVK[425.27]LTYPEPVTAYNIAELR.Q	YOR341W	3951.11	126.127	49130.8	127.13	12833.7	53175.1	9341.72	0.175679	5.69221
0.9863	JL033021_040221_RPA2HFH_Q2_10to1_1ug.23137.23137.3	0.747	K.TLTPEDVPIPKPASVEHDVTMAELK[407.26]PDR.V	DECOY_YER101C_UNMAPPED	3363.75	126.127	50502.8	127.13	14584.5	54648.5	11094.7	0.203019	4.92566
0.9697	JL033021_040221_RPA2HFH_Q2_10to1_1ug.23180.23180.4	0.0036	K.VLLSEVIDK[425.27]VIVTETTGTSNTAGGNAAR.S	YOR341W	3112.67	126.127	23066.7	127.13	6176	24964.2	4547.33	0.182154	5.48985
1	JL033021_040221_RPA2HFH_Q2_10to1_1ug.23188.23188.3	5.74e-09	R.AAAPTVVFLDELDSIAK[425.27]AR.G	YDL126C	2283.26	126.127	38030.2	127.131	9861.12	41161.3	7152.92	0.173778	5.75447
0.9834	JL033021_040221_RPA2HFH_Q2_10to1_1ug.23255.23255.4	0.0115	R.NLSAK[425.27]QITNPTVLDNLGHPVSGGLYDLALGAFLR.N	YOR341W	3861.09	126.127	45788.6	127.13	11632.3	49560.5	8354.39	0.16857	5.93227
0.9999	JL033021_040221_RPA2HFH_Q2_10to1_1ug.23499.23499.4	0.000243	R.NLSAK[407.26]QITNPTVLDNLGHPVSGGLYDLALGAFLR.N	YOR341W	3843.08	126.127	46095.2	127.13	10886.3	49899.1	7527.44	0.150853	6.62896
1	JL033021_040221_RPA2HFH_Q2_10to1_1ug.23545.23545.4	4.3e-09	K.M[147.04]QYFLSTGNLVSQSGLDLQQVSGYTVVAEK[425.27]INFYR.F	YPR010C	4268.15	126.127	61609.7	127.13	13801.6	66700.1	9258.66	0.13881	7.20408
1	JL033021_040221_RPA2HFH_Q2_10to1_1ug.23567.23567.4	2.7e-11	R.SVISPDPNIETNEIGVPPVFAVK[425.27]LTYPEPVTAYNIAELR.Q	YOR341W	4549.41	126.127	51567	127.13	12580.9	55819.2	8852.1	0.158585	6.30575
1	JL033021_040221_RPA2HFH_Q2_10to1_1ug.23613.23613.4	9.66e-17	R.SVISPDPNIETNEIGVPPVFAVK[425.27]LTYPEPVTAYNIAELR.Q	YOR341W	4549.41	126.128	329885	127.131	64962.9	357214	39998.3	0.111973	8.93073
1	JL033021_040221_RPA2HFH_Q2_10to1_1ug.23619.23619.5	1.67e-16	R.SVISPDPNIETNEIGVPPVFAVK[425.27]LTYPEPVTAYNIAELR.Q	YOR341W	4549.41	126.128	80952.4	127.131	17034.6	87650	10986.7	0.125347	7.97783
1	JL033021_040221_RPA2HFH_Q2_10to1_1ug.23654.23654.3	2.9e-06	L.SAK[407.26]QITNPTVLDNLGHPVSGGLYDLALGAFLR.N	YOR341W	3615.95	126.126	44422.4	127.13	11839.1	48077.2	8698.68	0.180931	5.52696
1	JL033021_040221_RPA2HFH_Q2_10to1_1ug.23668.23668.3	0.000139	K.EIRNLSAK[425.27]QITNPTVLDNLGHPVSGGLYDLALGAFLR.N	YOR341W	4259.31	126.127	20053.3	127.13	4398.9	21710.9	2913.54	0.134197	7.45172
0.9992	JL033021_040221_RPA2HFH_Q2_10to1_1ug.23770.23770.3	0.25	K.EESDEIGGYFIVNGIEK[425.27]LIR.M	YPR010C	2577.34	126.126	52977.6	127.13	13946.9	57337.6	10189.2	0.177706	5.62726
1	JL033021_040221_RPA2HFH_Q2_10to1_1ug.23795.23795.3	4.05e-06	K.EESDEIGGYFIVNGIEK[425.27]LIR.M	YPR010C	2577.34	126.127	55350	127.13	14397.1	59906.7	10458.8	0.174584	5.7279
1	JL033021_040221_RPA2HFH_Q2_10to1_1ug.23842.23842.5	3.12e-08	K.FGDTPSEPSDTLFLGNLSFNADRDAIFELFAK[425.27]HGEVVSVR.L	YGR159C	4694.34	126.127	54851.2	127.13	13096.3	59376.5	9109.59	0.153421	6.51802
1	JL033021_040221_RPA2HFH_Q2_10to1_1ug.23878.23878.4	6.33e-05	R.EIFDGIIGNDVK[425.27]DSFLTDRLELLLR.G	YPR010C	3187.72	126.126	34890.4	127.13	8978.92	37763.5	6489.43	0.171844	5.81923
1	JL033021_040221_RPA2HFH_Q2_10to1_1ug.23956.23956.4	1.63e-06	R.SVISPDPNIETNEIGVPPVFAVK[425.27]LTYPEPVTAY.N	YOR341W	3853.02	126.127	41792.9	127.13	10914.7	45233.1	7944.08	0.175625	5.69394
1	JL033021_040221_RPA2HFH_Q2_10to1_1ug.24177.24177.4	3.46e-06	R.EIFDGIIGNDVK[425.27]DSFLTDRLELLLR.G	YPR010C	3187.72	126.127	81282.4	127.131	15764.2	88018.4	9595.65	0.109019	9.17273
1	JL033021_040221_RPA2HFH_Q2_10to1_1ug.24189.24189.3	9.8e-07	R.GLNFIISDVIEGVK[425.27]TGEDIDR.A	YGL161C	2586.36	126.127	39273.1	127.13	10757.7	42501.8	8002.05	0.188275	5.31137
0.9998	JL033021_040221_RPA2HFH_Q2_10to1_1ug.24240.24240.4	0.000349	R.NLSAK[425.27]QITNPTVLDNLGHPVSGGLYDLALGAFLR.N	YOR341W	3861.09	126.127	30541.5	127.13	7434.12	33060.1	5224.47	0.158029	6.32794
1	JL033021_040221_RPA2HFH_Q2_10to1_1ug.24274.24274.3	3.39e-13	K.SK[425.27]IEAALSDALAALQIEDPSADELR.K	YDL229W,YNL209W	2922.53	126.127	49558.9	127.131	11729.1	53648.5	8119.66	0.151349	6.60723
0.9991	JL033021_040221_RPA2HFH_Q2_10to1_1ug.24375.24375.4	8.16e-06	V.ISPDPNIETNEIGVPPVFAVK[425.27]LTYPEPVTAYNIAELR.Q	YOR341W	4363.31	126.126	21894.4	127.129	6343.13	23691.5	4831.66	0.20394	4.90339
1	JL033021_040221_RPA2HFH_Q2_10to1_1ug.24421.24421.3	0.000136	R.ELEK[425.27]FYSTQIEELPSDIATLLN.-	YJL138C,YKR059W	2849.47	126.127	38964.8	127.13	11093	42164.7	8389.08	0.19896	5.02614
1	JL033021_040221_RPA2HFH_Q2_10to1_1ug.24422.24422.3	1.25e-11	R.ALQLNPK[425.27]NTSASILVLLGEFR.E	YOL145C	2580.47	126.127	50308.8	127.13	13155.5	54450	9580.84	0.175957	5.68322
0.9692	JL033021_040221_RPA2HFH_Q2_10to1_1ug.24445.24445.4	0.115	R.EIFDGIIGNDVK[425.27]DSFLTDRLELLLR.G	YPR010C	3187.72	126.126	27551.7	127.13	5855.98	29830.7	3801.77	0.127445	7.84655
1	JL033021_040221_RPA2HFH_Q2_10to1_1ug.24447.24447.3	1.51e-05	R.ELEK[425.27]FYSTQIEELPSDIATLLN.-	YJL138C,YKR059W	2849.47	126.127	40193.2	127.13	10564.5	43501.2	7712.51	0.177294	5.64035
1	JL033021_040221_RPA2HFH_Q2_10to1_1ug.24491.24491.3	8.21e-07	R.LM[147.04]NAFVTIQNDVNAFIDSTK[425.27]AQGR.T	YOR341W	2965.5	126.126	59744.4	127.13	15437.3	64663.8	11178.9	0.172878	5.78443
1	JL033021_040221_RPA2HFH_Q2_10to1_1ug.24494.24494.4	1.68e-21	K.SISK[425.27]VLLSEVIDK[425.27]VIVTETTGTSNTAGGNAAR.S	YOR341W	3825.09	126.127	45972.4	127.13	11145	49763.8	7815.72	0.157056	6.36714
0.9896	JL033021_040221_RPA2HFH_Q2_10to1_1ug.24514.24514.5	3.55e-08	K.SISK[425.27]VLLSEVIDK[425.27]VIVTETTGTSNTAGGNAAR.S	YOR341W	3825.09	126.127	16804.8	127.13	5714.27	18177.2	4614.69	0.253873	3.93898
1	JL033021_040221_RPA2HFH_Q2_10to1_1ug.24538.24538.4	5.24e-06	R.LM[147.04]NAFVTIQNDVNAFIDSTK[425.27]AQGR.T	YOR341W	2965.5	126.127	34641.4	127.13	7794.16	37503.3	5242.23	0.139781	7.15407
1	JL033021_040221_RPA2HFH_Q2_10to1_1ug.24591.24591.3	1.73e-05	R.LM[147.04]NAFVTIQNDVNAFIDSTK[425.27]AQGR.T	YOR341W	2965.5	126.127	56764.7	127.131	16857	61420.7	12967.7	0.21113	4.73642
1	JL033021_040221_RPA2HFH_Q2_10to1_1ug.24660.24660.5	5.57e-08	R.NPTTRPK[425.27]TGSTYILSTEVK[425.27]NILDTVFR.K	YOR341W	3644.99	126.127	54847.7	127.13	11913.7	59382.5	7842.71	0.132071	7.57168
1	JL033021_040221_RPA2HFH_Q2_10to1_1ug.24718.24718.4	0.00024	R.DYTLEVELAPLIQLIK[425.27]ADHNDYNYTVNQEEAAR.A	YCL034W	4145.07	126.127	40277	127.13	11904.8	43581.1	9141.14	0.20975	4.76757
1	JL033021_040221_RPA2HFH_Q2_10to1_1ug.24752.24752.4	4.57e-06	R.LK[425.27]ILLPFLEQSLSQGIQDQAVYNALAK.L	YGL206C	3296.85	126.127	19876.2	127.13	6479.04	21501.7	5158.48	0.23991	4.16823
1	JL033021_040221_RPA2HFH_Q2_10to1_1ug.24755.24755.3	1.93e-08	R.LM[147.04]NAFVTIQNDVNAFIDSTK[425.27]AQGR.T	YOR341W	2965.5	126.126	56891.9	127.13	14967.6	61574.2	10931.6	0.177536	5.63265
1	JL033021_040221_RPA2HFH_Q2_10to1_1ug.24765.24765.3	3.06e-09	K.FEEVSK[425.27]DLIAVYYSFGGLLM[147.04]R.L	YOR224C	2749.41	126.127	39231.2	127.13	11383.1	42451.2	8676.05	0.204377	4.89292
1	JL033021_040221_RPA2HFH_Q2_10to1_1ug.24786.24786.4	3.5e-13	R.LM[147.04]NAFVTIQNDVNAFIDSTK[425.27]AQGR.T	YOR341W	2965.5	126.127	72757.5	127.131	14225.8	78786	8712.45	0.110584	9.04292
1	JL033021_040221_RPA2HFH_Q2_10to1_1ug.24923.24923.3	5.9e-08	R.LM[147.04]NAFVTIQNDVNAFIDSTK[425.27]AQGR.T	YOR341W	2965.5	126.127	93146.4	127.13	20123.9	100849	13202.4	0.130913	7.63865
1	JL033021_040221_RPA2HFH_Q2_10to1_1ug.24945.24945.4	1.08e-11	R.LM[147.04]NAFVTIQNDVNAFIDSTK[425.27]AQGR.T	YOR341W	2965.5	126.126	39911.1	127.13	9381.25	43205	6469.85	0.149747	6.67791
1	JL033021_040221_RPA2HFH_Q2_10to1_1ug.24983.24983.3	4.96e-12	K.FEEVSK[425.27]DLIAVYYSFGGLLM[147.04]R.L	YOR224C	2749.41	126.127	34429.9	127.13	10588.3	37250.9	8255.36	0.221615	4.51233
1	JL033021_040221_RPA2HFH_Q2_10to1_1ug.25056.25056.3	0.00167	R.LM[147.04]NAFVTIQNDVNAFIDSTK[425.27].A	YOR341W	2553.29	126.127	24170	127.13	7598.93	26149	5973.06	0.228424	4.37783
1	JL033021_040221_RPA2HFH_Q2_10to1_1ug.25091.25091.3	1.23e-05	R.LM[147.04]NAFVTIQNDVNAFIDSTK[425.27]AQGR.T	YOR341W	2965.5	126.126	53911.3	127.13	17063.3	58324.5	13444.9	0.230519	4.33804
1	JL033021_040221_RPA2HFH_Q2_10to1_1ug.25206.25206.3	1.98e-10	K.TNEGIK[425.27]LIEM[147.04]ALDVFQNSER.A	YOL145C	2619.33	126.127	32367.4	127.13	9550.3	35022.7	7328.22	0.209242	4.77916
1	JL033021_040221_RPA2HFH_Q2_10to1_1ug.25307.25307.4	0.000145	R.FINDGNK[425.27]HLSGNDEIIDLIDNLLR.Y	YIL035C	3034.58	126.127	14915	127.13	5303.1	16131.1	4343.74	0.269277	3.71364
1	JL033021_040221_RPA2HFH_Q2_10to1_1ug.25337.25337.3	2.39e-08	K.TNEGIK[425.27]LIEM[147.04]ALDVFQNSER.A	YOL145C	2619.33	126.127	33900	127.13	9167.25	36687.9	6780.17	0.184807	5.41106
0.999	JL033021_040221_RPA2HFH_Q2_10to1_1ug.25362.25362.3	2.09e-16	R.GSKSK[407.26]IEAALSDALAALQIEDPSADELR.K	YDL229W,YNL209W	3176.66	126.127	47770.5	127.13	12487.3	51702.8	9092.67	0.175864	5.6862
0.9918	JL033021_040221_RPA2HFH_Q2_10to1_1ug.25405.25405.3	1.61e-12	R.GSKSK[407.26]IEAALSDALAALQIEDPSADELR.K	YDL229W,YNL209W	3176.66	126.126	38215.3	127.13	13272.2	41334	10791.6	0.261083	3.83021
1	JL033021_040221_RPA2HFH_Q2_10to1_1ug.25417.25417.3	0.000111	K.TNEGIK[425.27]LIEM[147.04]ALDVFQNSER.A	YOL145C	2619.33	126.127	32131.1	127.13	9503.32	34766.9	7299.08	0.209944	4.76319
0.9999	JL033021_040221_RPA2HFH_Q2_10to1_1ug.25597.25597.4	0.000947	R.LM[147.04]NAFVTIQNDVNAFIDSTK[425.27]AQGR.T	YOR341W	2965.5	126.127	16892.8	127.13	3628.95	18289.8	2372.2	0.1297	7.71008
1	JL033021_040221_RPA2HFH_Q2_10to1_1ug.25716.25716.3	0.00563	R.TIGHSVQSPDDTVK[425.27]ILTELFNL.-	YFL045C	2723.45	126.127	42873.8	127.13	13537.9	46383.8	10658	0.22978	4.352
1	JL033021_040221_RPA2HFH_Q2_10to1_1ug.25952.25952.3	0.000269	K.DILSVDYTDIM[147.04]KILSK[407.26]SIEK.M	YAR010C,YBR012W-A,YBR012W-B,YDR098C-A,YDR098C-B,YDR210C-C,YDR210C-D,YDR261C-C,YDR261C-D,YDR316W-A,YDR316W-B,YDR365W-A,YDR365W-B,YER137C-A,YER138C,YER159C-A,YER160C,YGR027W-A,YGR027W-B,YGR038C-A,YGR038C-B,YGR161C-C,YGR161C-D,YHR214C-B,YHR214C-C,YJR026W,YJR027W,YJR028W,YJR029W,YLR157C-A,YLR157C-B,YLR227W-A,YLR227W-B,YLR256W-A,YML039W,YML040W,YML045W,YML045W-A,YMR050C,YMR051C,YNL054W-A,YNL054W-B,YOL…	2605.4	126.127	34318.5	127.13	7537.86	37155.3	4996.56	0.134478	7.43618
0.9995	JL033021_040221_RPA2HFH_Q2_10to1_1ug.26129.26129.3	0.00129	L.SAK[407.26]QITNPTVLDNLGHPVSGGLYDLALGAFLR.N	YOR341W	3615.95	126.127	26158	127.13	7702.48	28304.1	5905.55	0.208647	4.79279
1	JL033021_040221_RPA2HFH_Q2_10to1_1ug.26164.26164.3	7.2e-05	A.K[425.27]QITNPTVLDNLGHPVSGGLYDLALGAFLR.N	YOR341W	3475.89	126.127	28026.2	127.13	9675.69	30313.8	7852.31	0.259035	3.86049
1	JL033021_040221_RPA2HFH_Q2_10to1_1ug.26708.26708.3	6.35e-11	K.FVGGNETTTVAIPFVLK[425.27]YLDSELSAM[147.04]GIR.L	YPR010C	3440.8	126.127	69932.6	127.13	16103.4	75707.1	10978	0.145007	6.89624
1	JL033021_040221_RPA2HFH_Q2_10to1_1ug.26709.26709.4	1.24e-09	K.FVGGNETTTVAIPFVLK[425.27]YLDSELSAM[147.04]GIR.L	YPR010C	3440.8	126.127	40862.2	127.13	9069.92	44239.1	6050.84	0.136776	7.31123
1	JL033021_040221_RPA2HFH_Q2_10to1_1ug.26723.26723.3	1.11e-10	K.FVGGNETTTVAIPFVLK[425.27]YLDSELSAM[147.04]GIR.L	YPR010C	3440.8	126.127	99129.4	127.13	21715.8	107324	14371.1	0.133904	7.46805
1	JL033021_040221_RPA2HFH_Q2_10to1_1ug.26752.26752.3	0.000945	R.IDVM[147.04]GEIPSFVK[407.26]NIVSGVAGTKPFIYQYADPK.S	YDR346C	3777.98	126.127	27526.4	127.13	7975.21	29785.8	6074.96	0.203955	4.90305
1	JL033021_040221_RPA2HFH_Q2_10to1_1ug.26833.26833.3	0.00198	K.FVGGNETTTVAIPFVLK[425.27]YLDSELSAM[147.04]GIR.L	YPR010C	3440.8	126.127	43278.5	127.13	11750.8	46837.4	8706.75	0.185893	5.37943
0.9987	JL033021_040221_RPA2HFH_Q2_10to1_1ug.26920.26920.3	0.00106	V.LLSEVIDK[425.27]VIVTETTGTSNTAGGNAAR.S	YOR341W	3013.6	126.127	26937.1	127.13	11301.9	29119.3	9692.67	0.332861	3.00426
0.9999	JL033021_040221_RPA2HFH_Q2_10to1_1ug.27137.27137.4	0.0181	S.VISPDPNIETNEIGVPPVFAVK[425.27]LTYPEPVTAYNIAELR.Q	YOR341W	4462.38	126.127	19133.1	127.13	7354.08	20688.6	6162.86	0.297887	3.35698
0.9967	JL033021_040221_RPA2HFH_Q2_10to1_1ug.27165.27165.4	0.00229	S.VISPDPNIETNEIGVPPVFAVK[425.27]LTYPEPVTAYNIAELR.Q	YOR341W	4462.38	126.127	18356.8	127.13	6833.54	19851.1	5674.75	0.285866	3.49814
1	JL033021_040221_RPA2HFH_Q2_10to1_1ug.27681.27681.3	7.85e-11	K.TGSTYILSTEVK[425.27]NILDTVFR.K	YOR341W	2553.38	126.127	103896	127.13	18567.9	112519	10570	0.0939397	10.6451
1	JL033021_040221_RPA2HFH_Q2_10to1_1ug.27783.27783.4	2.33e-12	R.FTNK[425.27]DIIC[160.03]QIISSTITGDVVLAAAYSHELPR.Y	YPL131W	3728.95	126.127	16474.4	127.13	6112.62	17815.6	5071.22	0.28465	3.51308
0.9908	JL033021_040221_RPA2HFH_Q2_10to1_1ug.27953.27953.4	0.0318	R.TFLIDPSEEM[147.04]ANNYDFLLTLQK[425.27]EIVTNILKPGR.T	YGL207W	4135.16	126.127	28324.4	127.13	9954.08	30634.9	8123.85	0.265183	3.77098
1	JL033021_040221_RPA2HFH_Q2_10to1_1ug.29082.29082.4	1.37e-08	R.FFDNNEYSEEYDVSK[425.27]EELQNVISNQFIHLLEAAIVK.E	YOR341W	4571.25	126.127	17990.7			19510.4	-1615.08	-0.0827804	-12.0802
1	JL033021_040221_RPA2HFH_Q2_10to1_1ug.29128.29128.5	1.72e-12	R.FFDNNEYSEEYDVSK[425.27]EELQNVISNQFIHLLEAAIVK.E	YOR341W	4571.25	126.127	17639.6	127.13	6444.62	19076.5	5322.38	0.279002	3.5842
1	JL033021_040221_RPA2HFH_Q2_10to1_1ug.29132.29132.5	4.91e-14	R.FFDNNEYSEEYDVSK[425.27]EELQNVISNQFIHLLEAAIVK.E	YOR341W	4571.25	126.127	17100	127.13	5186.7	18501.7	4022.85	0.217432	4.59915
0.9998	JL033021_040221_RPA2HFH_Q2_10to1_1ug.29202.29202.4	0.00108	R.FFDNNEYSEEYDVSK[425.27]EELQNVISNQFIHLLEAAIVK.E	YOR341W	4571.25	126.127	17902.9	127.13	6666.69	19360.2	5536.71	0.285985	3.49669
0.9942	JL033021_040221_RPA2HFH_Q2_10to1_1ug.29294.29294.3	0.0479	-.M[147.04]K[407.26]PEVEQELAHILLTELLAYQFASPVR.W	YPL231W	3419.82	126.127	22059.1	127.13	8685.31	23850.8	7326.72	0.30719	3.25532
0.9691	JL033021_040221_RPA2HFH_Q2_10to1_1ug.30476.30476.4	2.13	R.LMIKNMC[160.03]QELQHGIISKPPAFEWDNFVTQHPSC[160.03]LLNWK[425.27].S	YGR097W	4906.43	126.127	14496.1	127.13	4977.08	15679.6	4031.99	0.257149	3.88879
1	JL033021_040221_RPA2HFH_Q2_10to1_1ug.30680.30680.4	3.87e-05	R.SLADDYDYVM[147.04]YGTAYK[425.27]FEEVSK[425.27]DLIAVYYSFGGLLM[147.04]R.L	YOR224C	4918.38	126.127	21659.2	127.13	11208.5	23396.4	10066.4	0.430256	2.3242
1	JL033021_040221_RPA2HFH_Q2_10to1_1ug.30688.30688.4	9.57e-05	R.SLADDYDYVM[147.04]YGTAYK[425.27]FEEVSK[425.27]DLIAVYYSFGGLLM[147.04]R.L	YOR224C	4918.38	126.127	19895.3	127.13	11382	21482.1	10410.7	0.484623	2.06346
1	JL033021_040221_RPA2HFH_Q2_10to1_1ug.30735.30735.3	1.95e-06	R.AALDKEFK[407.26]YFADAIAEASNGLLTVENTFR.D	YGL207W	3482.78	126.127	15059.1	127.13	5402.95	16286.6	4437.8	0.272481	3.66998
1	JL033021_040221_RPA2HFH_Q2_10to1_1ug.30755.30755.3	2.36e-10	L.SK[425.27]VLLSEVIDK[425.27]VIVTETTGTSNTAGGNAAR.S	YOR341W	3624.97	126.127	15311	127.13	5781.82	16556.6	4821.18	0.291193	3.43414
0.9917	JL033021_040221_RPA2HFH_Q2_10to1_50B.02681.02681.3	0.36	K.KK[425.27]LETVSK.D	YLR319C	1228.75	126.126	58191	127.13	9860.02	63025.1	5341.84	0.0847573	11.7984
1	JL033021_040221_RPA2HFH_Q2_10to1_50B.02805.02805.3	0.00872	R.K[425.27]NSHETPAK.S	YPL260W	1307.69	126.127	26458.1	127.13	4977.69	28652	2958.78	0.103266	9.68371
1	JL033021_040221_RPA2HFH_Q2_10to1_50B.03504.03504.3	0.0118	R.VEHIK[425.27]HSK.C	YBR191W,YPL079W	1273.72	126.127	79604.3	127.13	13941.4	86213.5	7793.04	0.0903923	11.0629
1	JL033021_040221_RPA2HFH_Q2_10to1_50B.03543.03543.3	0.00675	R.VEHIK[425.27]HSK.C	YBR191W,YPL079W	1273.72	126.127	83786.1	127.13	12905.8	90757.1	6307.92	0.0695033	14.3878
0.9817	JL033021_040221_RPA2HFH_Q2_10to1_50B.03783.03783.3	0.319	R.HGQK[425.27]GVC[160.03]SR.K	YPR010C	1324.68	126.127	372769	127.13	42456	403906	12030.6	0.0297856	33.5733
0.9838	JL033021_040221_RPA2HFH_Q2_10to1_50B.03794.03794.3	0.945	R.RNPSDEK[425.27]NDSR.S	YAR010C,YBR012W-A,YBR012W-B,YDR098C-A,YDR098C-B,YDR261C-C,YDR261C-D,YDR316W-A,YDR316W-B,YER159C-A,YER160C,YGR038C-A,YGR038C-B,YGR161C-C,YGR161C-D,YHR214C-B,YHR214C-C,YJR028W,YJR029W,YML045W,YML045W-A,YMR050C,YMR051C,YNL054W-A,YNL054W-B,YOR142W-A,YOR142W-B,YPR137C-A,YPR137C-B,YPR158W-A,YPR158W-B	1613.78	126.127	40649.2	127.13	7424.14	44021.6	4306.38	0.0978243	10.2224
0.9866	JL033021_040221_RPA2HFH_Q2_10to1_50B.03876.03876.3	4.76e-06	R.VK[425.27]NKQPYR.E	YDR346C	1328.76	126.127	320688	127.13	51877.4	347349	26801.8	0.0771609	12.9599
1	JL033021_040221_RPA2HFH_Q2_10to1_50B.03959.03959.3	0.00277	R.HGQK[425.27]GVC[160.03]SR.K	YPR010C	1324.68	126.127	127062	127.13	21296.2	137620	11413.8	0.0829373	12.0573
0.9846	JL033021_040221_RPA2HFH_Q2_10to1_50B.03960.03960.3	0.0302	R.AARPTRPDK[425.27]AR.R	YLR029C,YMR121C	1534.88	126.126	48492.5	127.13	8849.37	52515.7	5129.52	0.0976759	10.2379
0.9984	JL033021_040221_RPA2HFH_Q2_10to1_50B.04257.04257.3	0.087	L.ISLAETTSK[407.26].K	YDR097C	1227.68	126.127	83420.2	127.13	13097.1	90358.7	6545.77	0.0724421	13.8041
0.9922	JL033021_040221_RPA2HFH_Q2_10to1_50B.04747.04747.4	2.82	R.C[160.03]VHPEPENGK[425.27]R.V	YOR341W	1618.8	126.127	154962	127.13	26156.7	167836	14117.7	0.0841159	11.8884
0.9993	JL033021_040221_RPA2HFH_Q2_10to1_50B.04753.04753.3	0.14	R.AYNTTK[425.27]QR.V	YMR309C	1277.68	126.127	146636	127.13	25362.7	158813	14014.2	0.0882434	11.3323
0.9971	JL033021_040221_RPA2HFH_Q2_10to1_50B.04825.04825.3	0.0461	R.VVTK[425.27]AM[147.04]SSR.-	YDL229W,YNL209W	1290.7	126.127	235113	127.13	41888.9	254627	23780.6	0.0933939	10.7073
1	JL033021_040221_RPA2HFH_Q2_10to1_50B.04861.04861.4	0.0067	K.AK[425.27]YC[160.03]DSM[147.04]GRPQR.K	YBR154C	1780.84	126.127	157239	127.13	22713.3	170333	10223.3	0.0600196	16.6612
1	JL033021_040221_RPA2HFH_Q2_10to1_50B.04890.04890.3	0.0205	K.AK[425.27]YC[160.03]DSM[147.04]GRPQR.K	YBR154C	1780.84	126.127	127797	127.13	16109.6	138460	5790.05	0.0418176	23.9134
0.9995	JL033021_040221_RPA2HFH_Q2_10to1_50B.04967.04967.4	4.93e-06	E.GGQEDFESSGAGK[425.27]IGLGGRGGSGGSYGRGSRGGSGGSYGGGGSGGGYGGGSGSR.G	K1CI_HUMAN	4969.24					0	0	#DIV/0!	#DIV/0!
0.9992	JL033021_040221_RPA2HFH_Q2_10to1_50B.04994.04994.4	8.55e-06	E.GGQEDFESSGAGK[425.27]IGLGGRGGSGGSYGRGSRGGSGGSYGGGGSGGGYGGGSGSR.G	K1CI_HUMAN	4969.24					0	0	#DIV/0!	#DIV/0!
0.9947	JL033021_040221_RPA2HFH_Q2_10to1_50B.05037.05037.4	0.000148	E.GGQEDFESSGAGK[425.27]IGLGGRGGSGGSYGRGSRGGSGGSYGGGGSGGGYGGGSGSR.G	K1CI_HUMAN	4969.24					0	0	#DIV/0!	#DIV/0!
1	JL033021_040221_RPA2HFH_Q2_10to1_50B.05161.05161.4	2.46e-07	E.GGQEDFESSGAGK[425.27]IGLGGRGGSGGSYGRGSRGGSGGSYGGGGSGGGYGGGSGSR.G	K1CI_HUMAN	4969.24					0	0	#DIV/0!	#DIV/0!
1	JL033021_040221_RPA2HFH_Q2_10to1_50B.05270.05270.4	6.86e-05	R.AGHSATGGM[147.04]K[425.27]LGGGAGR.R	YFR051C	1796.9	126.127	88279.6	127.13	14544.5	95616.6	7660.47	0.0801165	12.4818
0.9615	JL033021_040221_RPA2HFH_Q2_10to1_50B.05300.05300.3	0.915	R.NAC[160.03]HGTIK[425.27]VK.K	YDR346C	1423.77	126.127	123812	127.131	21025.6	134097	11415.6	0.0851297	11.7468
0.9931	JL033021_040221_RPA2HFH_Q2_10to1_50B.05331.05331.3	0.0395	R.AGHSATGGM[147.04]K[425.27]LGGGAGR.R	YFR051C	1796.9	126.127	51798.3	127.13	10501.9	56087.1	6603.52	0.117737	8.49351
1	JL033021_040221_RPA2HFH_Q2_10to1_50B.05354.05354.3	0.0112	K.LSAK[425.27]GQQEAAR.A	YKL152C	1454.79	126.127	120057	127.13	22102.3	130016	12906.6	0.0992694	10.0736
0.9989	JL033021_040221_RPA2HFH_Q2_10to1_50B.05358.05358.4	1.37e-05	E.GGQEDFESSGAGK[425.27]IGLGGRGGSGGSYGRGSRGGSGGSYGGGGSGGGYGGGSGSR.G	K1CI_HUMAN	4969.24					0	0	#DIV/0!	#DIV/0!
1	JL033021_040221_RPA2HFH_Q2_10to1_50B.05510.05510.3	0.000627	R.DGIHDTNK[425.27]QAQAENSR.Q	YPL232W	2080	126.126	23034.9	127.13	3869.9	24948.8	2079	0.0833308	12.0004
1	JL033021_040221_RPA2HFH_Q2_10to1_50B.05515.05515.4	8.84e-05	R.DGIHDTNK[425.27]QAQAENSR.Q	YPL232W	2080	126.127	46590.7	127.13	7583.71	50463.7	3943.98	0.0781548	12.7951
1	JL033021_040221_RPA2HFH_Q2_10to1_50B.05543.05543.4	4.19e-09	E.GGQEDFESSGAGK[425.27]IGLGGRGGSGGSYGRGSRGGSGGSYGGGGSGGGYGGGSGSR.G	K1CI_HUMAN	4969.24					0	0	#DIV/0!	#DIV/0!
1	JL033021_040221_RPA2HFH_Q2_10to1_50B.05593.05593.3	5.48e-05	R.K[425.27]QNSPTTYGASR.R	YOR123C	1605.82	126.127	150357	127.131	26058.7	162843	14426	0.0885889	11.2881
1	JL033021_040221_RPA2HFH_Q2_10to1_50B.05608.05608.4	1.13e-08	E.GGQEDFESSGAGK[425.27]IGLGGRGGSGGSYGRGSRGGSGGSYGGGGSGGGYGGGSGSR.G	K1CI_HUMAN	4969.24					0	0	#DIV/0!	#DIV/0!
0.9999	JL033021_040221_RPA2HFH_Q2_10to1_50B.05708.05708.4	0.000486	E.GGQEDFESSGAGK[425.27]IGLGGRGGSGGSYGRGSRGGSGGSYGGGGSGGGYGGGSGSR.G	K1CI_HUMAN	4969.24					0	0	#DIV/0!	#DIV/0!
1	JL033021_040221_RPA2HFH_Q2_10to1_50B.05717.05717.4	0.000168	R.M[147.04]SVYEK[425.27]HHENDQSDIK.K	YGL244W	2272.05	126.127	43199.4	127.13	7389.27	46787.5	4040.07	0.0863494	11.5809
0.9999	JL033021_040221_RPA2HFH_Q2_10to1_50B.05758.05758.4	6.5e-06	E.GGQEDFESSGAGK[425.27]IGLGGRGGSGGSYGRGSRGGSGGSYGGGGSGGGYGGGSGSR.G	K1CI_HUMAN	4969.24					0	0	#DIV/0!	#DIV/0!
1	JL033021_040221_RPA2HFH_Q2_10to1_50B.05761.05761.3	0.00119	R.K[407.26]QNSPTTYGASR.R	YOR123C	1587.81	126.127	47911.4	127.131	9211.55	51882.6	5569.79	0.107354	9.315
1	JL033021_040221_RPA2HFH_Q2_10to1_50B.05764.05764.3	5.14e-06	R.NAC[160.03]HGTIK[407.26]VKK.E	YDR346C	1533.85	126.127	129654	127.13	21135.1	140431	11008.6	0.0783915	12.7565
0.9999	JL033021_040221_RPA2HFH_Q2_10to1_50B.05956.05956.3	0.139	R.NLSDEK[425.27]NDSR.S	YDR365W-A,YDR365W-B,YER137C-A,YER138C,YGR027W-A,YGR027W-B,YJR026W,YJR027W,YLR157C-A,YLR157C-B,YLR227W-A,YLR227W-B,YLR256W-A,YML039W,YML040W,YOL103W-A,YOL103W-B,YPL257W-A,YPL257W-B,YPR158C-C,YPR158C-D	1473.71	126.127	127234	127.131	21164.2	137807	11257	0.0816868	12.2419
0.9664	JL033021_040221_RPA2HFH_Q2_10to1_50B.05968.05968.4	4.89e-05	E.GGQEDFESSGAGK[425.27]IGLGGRGGSGGSYGRGSRGGSGGSYGGGGSGGGYGGGSGSR.G	K1CI_HUMAN	4969.24					0	0	#DIV/0!	#DIV/0!
0.9999	JL033021_040221_RPA2HFH_Q2_10to1_50B.05990.05990.3	0.0197	R.TSPNTTNTK[425.27]VTTR.N	YBL100W-A,YBL100W-B,YCL019W,YCL020W,YDR034C-C,YDR034C-D,YDR210W-A,YDR210W-B,YFL002W-A,YFL002W-B,YGR161W-A,YGR161W-B,YLR410W-A,YLR410W-B,YOR192C-A,YOR192C-B,YOR343W-A,YOR343W-B	1716.91	126.127	48265.8	127.13	9053.47	52268.2	5368.58	0.102712	9.73594
1	JL033021_040221_RPA2HFH_Q2_10to1_50B.06004.06004.3	0.000131	R.K[425.27]VYPSESR.Q	YPR010C	1261.67	126.127	986521	127.13	172942	1.06843e+06	96758.7	0.0905619	11.0422
0.9999	JL033021_040221_RPA2HFH_Q2_10to1_50B.06020.06020.3	0.00715	R.LQTDVANSSSNSK[425.27]R.L	YOR341W	1802.92	126.127	61932	127.13	10277.2	67078.7	5453.08	0.0812938	12.3011
1	JL033021_040221_RPA2HFH_Q2_10to1_50B.06039.06039.3	0.000637	R.TGQIK[425.27]TGAPAR.S	YGR254W,YHR174W	1395.79	126.127	137064	127.13	25035.3	148435	14522.8	0.0978393	10.2208
0.9555	JL033021_040221_RPA2HFH_Q2_10to1_50B.06112.06112.3	0.104	K.LVHEFHK[425.27]K.L	YOR341W	1333.76	126.127	215171	127.13	37680.7	233036	21061.4	0.0903784	11.0646
0.9608	JL033021_040221_RPA2HFH_Q2_10to1_50B.06130.06130.3	0.0161	K.LGK[425.27]YPPTFN.L	YJL093C	1332.72	126.127	255300	127.13	40310.9	276533	20277.4	0.0733272	13.6375
0.9998	JL033021_040221_RPA2HFH_Q2_10to1_50B.06185.06185.4	9.83e-08	E.GGQEDFESSGAGK[425.27]IGLGGRGGSGGSYGRGSRGGSGGSYGGGGSGGGYGGGSGSR.G	K1CI_HUMAN	4969.24					0	0	#DIV/0!	#DIV/0!
1	JL033021_040221_RPA2HFH_Q2_10to1_50B.06188.06188.3	4.8e-07	R.LQTDVANSSSNSK[425.27]R.L	YOR341W	1802.92	126.127	448786	127.131	81615.4	486022	47168.8	0.0970508	10.3039
0.9603	JL033021_040221_RPA2HFH_Q2_10to1_50B.06234.06234.4	4.07e-05	E.GGQEDFESSGAGK[425.27]IGLGGRGGSGGSYGRGSRGGSGGSYGGGGSGGGYGGGSGSR.G	K1CI_HUMAN	4969.24					0	0	#DIV/0!	#DIV/0!
1	JL033021_040221_RPA2HFH_Q2_10to1_50B.06249.06249.3	0.00018	R.K[425.27]VYPSESR.Q	YPR010C	1261.67	126.127	301818	127.131	54967.9	326859	31807.5	0.0973125	10.2762
1	JL033021_040221_RPA2HFH_Q2_10to1_50B.06312.06312.3	9.69e-07	R.K[425.27]TDEPVADAER.S	YNL124W	1526.77	126.127	68532.9	127.13	13445.9	74211	8255.98	0.11125	8.98875
1	JL033021_040221_RPA2HFH_Q2_10to1_50B.06354.06354.3	7.08e-06	R.LQTDVANSSSNSK[425.27]R.L	YOR341W	1802.92	126.127	294355	127.131	57513.1	318745	35204.9	0.110449	9.05398
1	JL033021_040221_RPA2HFH_Q2_10to1_50B.06375.06375.3	0.00115	R.LQTDVANSSSNSK[425.27]R.L	YOR341W	1802.92	126.127	269803	127.131	51972.9	292164	31472.2	0.107721	9.28326
1	JL033021_040221_RPA2HFH_Q2_10to1_50B.06381.06381.3	0.00581	R.NPSTK[425.27]EANIR.D	YBR279W	1425.77	126.127	134784	127.13	23168.8	145978	12727.4	0.0871872	11.4696
0.9616	JL033021_040221_RPA2HFH_Q2_10to1_50B.06409.06409.3	0.197	R.K[425.27]VYPSESR.Q	YPR010C	1261.67	126.128	142045	127.131	25170.4	153836	14220.4	0.0924387	10.818
1	JL033021_040221_RPA2HFH_Q2_10to1_50B.06540.06540.3	0.00319	R.LQTDVANSSSNSK[425.27]R.L	YOR341W	1802.92	126.127	123931	127.13	24848.7	134195	15501.8	0.115517	8.65675
0.9998	JL033021_040221_RPA2HFH_Q2_10to1_50B.06541.06541.3	0.0243	-.LVGFLESM[147.04]K[425.27].S	DECOY_YJR002W_UNMAPPED	1335.72	126.127	106671	127.13	19331.5	115522	11139.2	0.096425	10.3707
0.9737	JL033021_040221_RPA2HFH_Q2_10to1_50B.06544.06544.3	0.0257	K.K[425.27]DVDGAYM[147.04]TK.V	K2C1_HUMAN	1439.7	126.127	91766.5	127.13	14639.3	99397.3	7449.04	0.074942	13.3436
0.9818	JL033021_040221_RPA2HFH_Q2_10to1_50B.06563.06563.4	1.96e-06	E.GGQEDFESSGAGK[425.27]IGLGGRGGSGGSYGRGSRGGSGGSYGGGGSGGGYGGGSGSR.G	K1CI_HUMAN	4969.24					0	0	#DIV/0!	#DIV/0!
1	JL033021_040221_RPA2HFH_Q2_10to1_50B.06586.06586.3	7.83e-07	R.GM[147.04]ATNSENSGSGEK[425.27]YEPR.L	YCL034W	2225.99	126.127	38256.5	127.13	6957.35	41430.6	4020.98	0.0970532	10.3036
1	JL033021_040221_RPA2HFH_Q2_10to1_50B.06590.06590.3	0.013	R.LQTDVANSSSNSK[407.26]R.L	YOR341W	1784.91	126.127	72043.3	127.13	13936.5	78013.8	8466.59	0.108527	9.21432
0.9998	JL033021_040221_RPA2HFH_Q2_10to1_50B.06629.06629.3	0.0302	R.GGAEDAQK[425.27]EQIR.K	YGL207W	1597.81	126.127	74318.2	127.13	13275.5	80486.4	7554.05	0.0938549	10.6547
1	JL033021_040221_RPA2HFH_Q2_10to1_50B.06680.06680.3	0.00013	R.LK[425.27]SVEVHR.Y	YOR341W	1263.74	126.127	314879	127.13	56913.2	341008	32719.5	0.0959495	10.4221
0.9959	JL033021_040221_RPA2HFH_Q2_10to1_50B.06774.06774.4	9.95e-06	E.GGQEDFESSGAGK[425.27]IGLGGRGGSGGSYGRGSRGGSGGSYGGGGSGGGYGGGSGSR.G	K1CI_HUMAN	4969.24					0	0	#DIV/0!	#DIV/0!
1	JL033021_040221_RPA2HFH_Q2_10to1_50B.06848.06848.3	0.00442	R.LK[425.27]SVEVHR.Y	YOR341W	1263.74	126.127	204949	127.13	32293.2	221994	16206	0.0730017	13.6983
1	JL033021_040221_RPA2HFH_Q2_10to1_50B.06856.06856.3	0.00014	R.LK[425.27]SVEVHR.Y	YOR341W	1263.74	126.127	189785	127.13	37097.5	205510	22715.5	0.110532	9.04715
0.9849	JL033021_040221_RPA2HFH_Q2_10to1_50B.06860.06860.4	3.39	R.VGQAVETVGQAGRPK[425.27]K.L	YHR027C	1921.08	126.127	99827.5	127.13	16065.1	108127	8253.29	0.0763293	13.1011
1	JL033021_040221_RPA2HFH_Q2_10to1_50B.06879.06879.3	0.00143	R.LK[407.26]SVEVHR.Y	YOR341W	1245.73	126.127	171842	127.13	34741.5	186071	21801.6	0.117168	8.53472
1	JL033021_040221_RPA2HFH_Q2_10to1_50B.06884.06884.3	0.00721	R.RFDDESVQK[425.27]DM[147.04]K.T	YDL229W,YNL209W	1809.86	126.127	72852.2	127.13	13605.4	78893.8	8039.14	0.101898	9.81371
1	JL033021_040221_RPA2HFH_Q2_10to1_50B.06888.06888.3	1.11e-05	R.LK[425.27]SVEVHR.Y	YOR341W	1263.74	126.127	163362	127.13	31322.2	176903	18898.8	0.106831	9.36055
0.962	JL033021_040221_RPA2HFH_Q2_10to1_50B.06920.06920.4	0.171	Q.QSLLLSQRESLVESSK[407.26].Q	DECOY_YAL041W_UNMAPPED	2082.14	126.127	99241.3	127.131	20153.9	107458	12687.4	0.118068	8.46968
0.9914	JL033021_040221_RPA2HFH_Q2_10to1_50B.06958.06958.4	3.43e-05	E.GGQEDFESSGAGK[425.27]IGLGGRGGSGGSYGRGSRGGSGGSYGGGGSGGGYGGGSGSR.G	K1CI_HUMAN	4969.24					0	0	#DIV/0!	#DIV/0!
0.9701	JL033021_040221_RPA2HFH_Q2_10to1_50B.06967.06967.3	0.37	R.LQTDVANSSSNSK[407.26]R.L	YOR341W	1784.91	126.127	61050	127.13	11723.9	66110.2	7082.5	0.107132	9.3343
1	JL033021_040221_RPA2HFH_Q2_10to1_50B.06978.06978.3	0.000779	R.LK[425.27]SVEVHR.Y	YOR341W	1263.74	126.127	113614	127.13	20133.6	123045	11375.3	0.0924484	10.8169
0.9998	JL033021_040221_RPA2HFH_Q2_10to1_50B.06983.06983.3	0.106	R.LQTDVANSSSNSK[407.26]R.L	YOR341W	1784.91	126.127	72653.4	127.13	13910.3	78675.7	8383.68	0.10656	9.38438
1	JL033021_040221_RPA2HFH_Q2_10to1_50B.06987.06987.4	2.13e-07	E.GGQEDFESSGAGK[425.27]IGLGGRGGSGGSYGRGSRGGSGGSYGGGGSGGGYGGGSGSR.G	K1CI_HUMAN	4969.24					0	0	#DIV/0!	#DIV/0!
1	JL033021_040221_RPA2HFH_Q2_10to1_50B.07033.07033.3	2.56e-07	R.K[425.27]DHGDVSNQLYAK.Y	YBR127C	1770.9	126.127	54658.7	127.13	8975.81	59201.8	4711.44	0.0795828	12.5655
0.9694	JL033021_040221_RPA2HFH_Q2_10to1_50B.07036.07036.3	0.253	R.SQIM[147.04]QK[425.27]YQER.K	YGL244W	1622.82	126.127	88671.4	127.13	15832	96030.9	9004.95	0.0937714	10.6642
1	JL033021_040221_RPA2HFH_Q2_10to1_50B.07146.07146.3	0.00437	R.TASK[425.27]DLPTR.A	YNL248C	1284.71	126.127	145572	127.13	27177.4	157645	16054.4	0.101839	9.81943
1	JL033021_040221_RPA2HFH_Q2_10to1_50B.07172.07172.3	0.0012	R.TASK[425.27]DLPTR.A	YNL248C	1284.71	126.127	201830	127.13	38589.6	218560	23233.1	0.106301	9.40726
1	JL033021_040221_RPA2HFH_Q2_10to1_50B.07213.07213.3	4.19e-05	K.HISSNVNK[425.27]LTK.L	YKL193C	1536.87	126.127	136013	127.13	20323.9	147334	9568.41	0.0649436	15.398
0.9997	JL033021_040221_RPA2HFH_Q2_10to1_50B.07216.07216.3	0.0263	R.SQIM[147.04]QK[425.27]YQER.K	YGL244W	1622.82	126.127	103835	127.13	19322.6	112446	11384.2	0.101241	9.87744
1	JL033021_040221_RPA2HFH_Q2_10to1_50B.07222.07222.3	0.000182	K.SIVEANNNM[147.04]NK[425.27]VQR.D	YOR341W	1928.98	126.128	456986	127.131	66009.1	495043	29709.2	0.0600132	16.663
1	JL033021_040221_RPA2HFH_Q2_10to1_50B.07250.07250.3	0.0347	R.GQK[425.27]LASNIK.L	YGL009C	1254.74	126.127	277820	127.13	44499	300921	22743.7	0.0755803	13.231
0.9999	JL033021_040221_RPA2HFH_Q2_10to1_50B.07312.07312.3	0.00378	K.DK[425.27]VSLEDRR.V	YOR341W	1413.77	126.127	141632	127.13	21841.4	153416	10690.1	0.0696806	14.3512
0.9997	JL033021_040221_RPA2HFH_Q2_10to1_50B.07385.07385.3	0.0405	K.SIVEANNNM[147.04]NK[425.27]VQR.D	YOR341W	1928.98	126.127	55770	127.131	9933.19	60398.9	5637.6	0.0933394	10.7136
0.998	JL033021_040221_RPA2HFH_Q2_10to1_50B.07389.07389.5	0.0156	R.QPTLHK[407.26]ASM[147.04]M[147.04]GHK[425.27]VR.V	YOR341W	2328.24	126.127	254275	127.13	48288.4	275356	28917.9	0.10502	9.52196
1	JL033021_040221_RPA2HFH_Q2_10to1_50B.07440.07440.3	1.07e-06	R.TK[425.27]TPGPGGQAALR.A	YCR031C,YJL191W	1549.87	126.127	79338.8	127.13	14302	85922.6	8203.31	0.0954732	10.4741
0.9942	JL033021_040221_RPA2HFH_Q2_10to1_50B.07645.07645.3	0.00106	K.AADEAFAK[425.27]K.H	YDL229W,YNL209W	1246.66	126.127	96770.9	127.13	18094.2	104796	10702	0.102122	9.79222
1	JL033021_040221_RPA2HFH_Q2_10to1_50B.07750.07750.3	0.00718	R.LK[425.27]ESQLPR.L	YBR154C	1266.74	126.127	846911	127.131	153570	917183	88533.3	0.0965274	10.3598
1	JL033021_040221_RPA2HFH_Q2_10to1_50B.07834.07834.3	0.000492	K.AADEAFAKK[407.26]HEAR.Q	YDL229W,YNL209W	1721.89	126.127	125157	127.13	20776.9	135558	11028.4	0.0813553	12.2918
0.9791	JL033021_040221_RPA2HFH_Q2_10to1_50B.07843.07843.5	6.68e-05	R.STGPVNSLTM[147.04]QPVK[425.27]GRKR.H	YPR010C	2268.25	126.127	727291	127.13	137253	787594	81786.3	0.103843	9.6299
0.995	JL033021_040221_RPA2HFH_Q2_10to1_50B.07891.07891.3	0.0544	K.NVTDPIK[425.27]K.S	YGL009C	1210.7	126.127	165165	127.13	25063.9	178909	12030.7	0.0672447	14.8711
1	JL033021_040221_RPA2HFH_Q2_10to1_50B.07899.07899.4	0.000508	R.RPSSSSYTGK[425.27]SPLSR.Y	YHR082C	1906	126.127	122725	127.13	23693.4	132896	14372.1	0.108145	9.2468
1	JL033021_040221_RPA2HFH_Q2_10to1_50B.07905.07905.3	0.0137	R.LK[425.27]ESQLPR.L	YBR154C	1266.74	126.127	222458	127.13	42669.5	240897	25753.3	0.106906	9.35402
1	JL033021_040221_RPA2HFH_Q2_10to1_50B.08024.08024.3	1.62e-06	R.TK[425.27]GEVNENSAPDLQR.R	YJR072C	1953.98	126.127	57311.4	127.13	10846.6	62063.1	6478	0.104378	9.5806
1	JL033021_040221_RPA2HFH_Q2_10to1_50B.08058.08058.3	0.00108	K.IQDK[425.27]EGIPPDQQR.L	YIL148W,YKR094C,YLL039C,YLR167W	1819.95	126.127	64464.6	127.13	10803.4	69820.8	5789.55	0.0829201	12.0598
1	JL033021_040221_RPA2HFH_Q2_10to1_50B.08103.08103.3	2.9e-05	K.IQDK[425.27]EGIPPDQQR.L	YIL148W,YKR094C,YLL039C,YLR167W	1819.95	126.126	58275.7	127.13	11104	63106.7	6667.29	0.105651	9.46512
1	JL033021_040221_RPA2HFH_Q2_10to1_50B.08118.08118.3	1.31e-06	R.AAM[147.04]NDK[425.27]DLTM[147.04]GQVGER.L	RPB1-msCTD,YDL140C	2063.97	126.127	51276.1	127.13	13020.9	55500.1	9349.73	0.168463	5.93601
0.9995	JL033021_040221_RPA2HFH_Q2_10to1_50B.08180.08180.3	0.175	R.ATTPYM[147.04]TK[425.27]YER.A	YPR187W	1672.82	126.127	199985	127.131	37282.8	216570	21998.4	0.101577	9.84479
0.9836	JL033021_040221_RPA2HFH_Q2_10to1_50B.08232.08232.3	0.894	K.NELK[425.27]DGATIK.E	YJR063W	1384.76	126.127	119529	127.13	22504	129440	13384.4	0.103403	9.67091
1	JL033021_040221_RPA2HFH_Q2_10to1_50B.08252.08252.3	3.66e-06	K.K[425.27]QVTNPIDEK.N	YOR340C	1467.8	126.127	105652	127.13	18973.4	114420	10846.8	0.0947979	10.5488
0.9981	JL033021_040221_RPA2HFH_Q2_10to1_50B.08253.08253.3	0.00677	K.IQDK[425.27]EGIPPDQQR.L	YIL148W,YKR094C,YLL039C,YLR167W	1819.95	126.127	93933.3	127.13	17511.9	101723	10332.7	0.101577	9.84477
1	JL033021_040221_RPA2HFH_Q2_10to1_50B.08301.08301.3	3.2e-06	R.GK[425.27]NEIIQNAQR.D	RPB1-msCTD,YDL140C	1566.86	126.127	151858	127.131	28142.8	164453	16524.6	0.100482	9.95201
0.9906	JL033021_040221_RPA2HFH_Q2_10to1_50B.08320.08320.4	0.323	-.M[147.04]DYK[407.26]DHDGDYK[425.27]DH.D	3XFLAG	2229.98	126.127	154801	127.13	25511.1	167667	13440.3	0.0801605	12.475
1	JL033021_040221_RPA2HFH_Q2_10to1_50B.08353.08353.3	0.00195	R.EFEYK[425.27]DQDQSSPK.V	YGL009C	1896.88	126.127	58098.4	127.13	9421.72	62928.3	4880.48	0.0775563	12.8939
1	JL033021_040221_RPA2HFH_Q2_10to1_50B.08364.08364.3	0.00859	K.SK[425.27]TVHSILR.Y	YJR007W	1336.79	126.127	88255.5	127.13	14648.9	95589.7	7774.57	0.0813327	12.2952
0.9987	JL033021_040221_RPA2HFH_Q2_10to1_50B.08371.08371.3	0.498	K.DK[425.27]VSLEDR.R	YOR341W	1257.66	126.127	105640	127.13	17936.1	114415	9736.36	0.0850966	11.7513
1	JL033021_040221_RPA2HFH_Q2_10to1_50B.08416.08416.3	1.16e-07	R.K[425.27]GAGSIFTSHTR.L	YFR031C-A,YIL018W	1557.83	126.127	115567	127.13	22585.3	125143	13827.3	0.110492	9.05044
0.9553	JL033021_040221_RPA2HFH_Q2_10to1_50B.08423.08423.3	0.000285	R.VSSILK[425.27]EADKEK.K	YNL248C	1642.92	126.127	103195	127.13	18333.4	111761	10381.6	0.0928907	10.7653
0.9998	JL033021_040221_RPA2HFH_Q2_10to1_50B.08468.08468.3	0.0689	R.NGPNEHPGAK[425.27]YVIR.D	RPB1-msCTD,YDL140C	1847.97	126.127	108800	127.13	22434.6	117806	14273.2	0.121159	8.25364
1	JL033021_040221_RPA2HFH_Q2_10to1_50B.08476.08476.4	1.5e-05	R.NGPNEHPGAK[425.27]YVIR.D	RPB1-msCTD,YDL140C	1847.97	126.127	215665	127.13	43336.6	233525	27077.8	0.115952	8.62424
0.9999	JL033021_040221_RPA2HFH_Q2_10to1_50B.08499.08499.3	0.00861	R.HM[147.04]VNDK[425.27]FQVR.S	YPR010C	1585.81	126.127	383925	127.13	68904.6	415787	39370.8	0.0946898	10.5608
1	JL033021_040221_RPA2HFH_Q2_10to1_50B.08562.08562.3	0.00144	K.K[425.27]LNTNVIR.V	YMR307W	1253.75	126.127	209966	127.13	37098.9	227396	20905.3	0.0919337	10.8774
1	JL033021_040221_RPA2HFH_Q2_10to1_50B.08585.08585.3	0.000693	R.AK[425.27]IGGLNDPR.L	RPB1-msCTD,YDL140C	1336.75	126.127	140168	127.13	34575.6	151723	24467.3	0.161263	6.20106
0.9877	JL033021_040221_RPA2HFH_Q2_10to1_50B.08673.08673.3	0.0877	R.HM[147.04]VNDK[425.27]FQVR.S	YPR010C	1585.81	126.127	352778	127.13	61873.8	382067	34632.9	0.0906461	11.0319
0.9929	JL033021_040221_RPA2HFH_Q2_10to1_50B.08679.08679.3	0.267	R.NTTVPTIK[425.27]R.R	YDL229W,YNL209W	1325.77	126.127	436531	127.13	80619.6	472740	47201.8	0.0998473	10.0153
0.9969	JL033021_040221_RPA2HFH_Q2_10to1_50B.08792.08792.3	0.249	R.ILK[425.27]M[147.04]SPM[147.04]IAK.L	YOL145C	1459.82	126.127	50549.4	127.13	8617.16	54748.3	4696.03	0.0857749	11.6584
1	JL033021_040221_RPA2HFH_Q2_10to1_50B.08839.08839.4	2.02e-06	K.YK[425.27]DESDREHLESLPEM[147.04]ER.E	YGL244W	2575.19	126.127	54889.1	127.131	9145.17	59450.2	4872.25	0.0819551	12.2018
0.9671	JL033021_040221_RPA2HFH_Q2_10to1_50B.08857.08857.3	0.318	R.HM[147.04]VNDK[425.27]FQVR.S	YPR010C	1585.81	126.127	257984	127.13	51819.3	279348	32368.7	0.115872	8.6302
0.9535	JL033021_040221_RPA2HFH_Q2_10to1_50B.08969.08969.3	0.206	R.HGQK[425.27]GTIGITYR.R	YOR151C	1626.89	126.127	123168	127.131	23473.7	133379	14096.8	0.10569	9.46161
1	JL033021_040221_RPA2HFH_Q2_10to1_50B.08976.08976.3	6.17e-10	D.PK[425.27]ELYNNAHVYAR.D	YPR110C	1870.98	126.127	70674.5	127.13	12011.7	76545.3	6526.82	0.0852674	11.7278
1	JL033021_040221_RPA2HFH_Q2_10to1_50B.08994.08994.4	2.01e-09	R.RTEYVSNTIAAHDNTSLK[425.27]R.K	YBR279W	2472.28	126.127	94116.4	127.13	19756.9	101903	12722	0.124844	8.01
1	JL033021_040221_RPA2HFH_Q2_10to1_50B.09036.09036.3	1.86e-06	R.NK[425.27]NNDIESSSPSQLQHEA.-	YML123C	2294.09	126.127	42021.4	127.13	6579.69	45516.7	3278.3	0.072024	13.8843
1	JL033021_040221_RPA2HFH_Q2_10to1_50B.09051.09051.3	5.68e-06	R.NK[425.27]NNDIESSSPSQLQHEA.-	YML123C	2294.09	126.126	39263.2	127.13	7122.14	42521.1	4107.18	0.0965917	10.3529
0.9962	JL033021_040221_RPA2HFH_Q2_10to1_50B.09070.09070.4	0.0816	K.LQK[425.27]DK[425.27]VSLEDRR.V	YOR341W	2080.18	126.127	136542	127.13	21476.7	147899	10756.3	0.0727276	13.7499
1	JL033021_040221_RPA2HFH_Q2_10to1_50B.09118.09118.3	6.71e-07	R.NK[425.27]NNDIESSSPSQLQHEA.-	YML123C	2294.09	126.126	32420.2	127.13	5279.73	35115.2	2747.2	0.0782339	12.7822
1	JL033021_040221_RPA2HFH_Q2_10to1_50B.09143.09143.3	2.16e-06	R.NK[425.27]NNDIESSSPSQLQHEA.-	YML123C	2294.09	126.126	31643.3	127.13	5403.51	34271.7	2949.59	0.0860649	11.6191
1	JL033021_040221_RPA2HFH_Q2_10to1_50B.09163.09163.3	1.3e-11	R.K[425.27]M[147.04]M[147.04]SFQANPTEESISK.F	YBR154C	2156.02	126.127	139902	127.13	23300.6	151528	12409.1	0.081893	12.2111
0.9742	JL033021_040221_RPA2HFH_Q2_10to1_50B.09217.09217.3	0.202	K.RGEVVK[425.27]IIR.K	YBR154C	1365.85	126.127	1.67471e+06	127.13	286848	1.8138e+06	157038	0.0865794	11.5501
0.9873	JL033021_040221_RPA2HFH_Q2_10to1_50B.09233.09233.3	0.783	-.MSK[407.26]VIKPPGQAR.T	YPR010C	1589.92	126.127	114892	127.13	20114.9	124431	11240.6	0.0903364	11.0697
1	JL033021_040221_RPA2HFH_Q2_10to1_50B.09319.09319.3	1.16e-09	R.K[425.27]M[147.04]M[147.04]SFQANPTEESISK.F	YBR154C	2156.02	126.127	101567	127.13	17074.8	110006	9179.11	0.0834421	11.9844
1	JL033021_040221_RPA2HFH_Q2_10to1_50B.09332.09332.4	2.57e-05	R.M[147.04]NFSHGSYEYHK[425.27]SVIDNAR.K	YAL038W	2567.19	126.127	99034.3	127.13	17075.9	107259	9407.66	0.0877099	11.4012
0.9999	JL033021_040221_RPA2HFH_Q2_10to1_50B.09379.09379.3	3.92e-05	K.AK[425.27]M[147.04]NQLSPLER.V	YLR342W	1598.85	126.127	87630.6	127.131	17680.7	94887	11079.5	0.116765	8.56419
0.9995	JL033021_040221_RPA2HFH_Q2_10to1_50B.09409.09409.3	0.219	R.ALM[147.04]QLK[425.27]YM[147.04]R.S	YOR341W	1481.78	126.127	92680.9	127.13	17053.3	100369	9953.82	0.0991722	10.0835
0.9999	JL033021_040221_RPA2HFH_Q2_10to1_50B.09416.09416.3	0.0541	-.MSK[407.26]VIKPPGQAR.T	YPR010C	1589.92	126.127	113316	127.13	17671	122742	8763.27	0.0713961	14.0064
1	JL033021_040221_RPA2HFH_Q2_10to1_50B.09432.09432.3	0.0294	R.VLPNEK[425.27]TLR.L	YOR341W	1365.81	126.127	924848	127.13	173820	1.00154e+06	103236	0.103078	9.70139
0.9997	JL033021_040221_RPA2HFH_Q2_10to1_50B.09439.09439.3	0.0351	R.RKPDQKLLDK[407.26].L	DECOY_YHR152W_UNMAPPED	1518.9	126.127	184638	127.131	28272.9	200001	13721.3	0.068606	14.576
0.9622	JL033021_040221_RPA2HFH_Q2_10to1_50B.09454.09454.3	9.94e-05	R.APKYASK[407.26]AVPHYNR.L	YOL127W	1880.01	126.126	57698.7	127.129	8753.33	62500.4	4200.13	0.0672016	14.8806
0.9988	JL033021_040221_RPA2HFH_Q2_10to1_50B.09492.09492.3	0.011	K.AK[425.27]M[147.04]NQLSPLER.V	YLR342W	1598.85	126.127	52836.1	127.13	9013.19	57224.9	4915.12	0.0858914	11.6426
1	JL033021_040221_RPA2HFH_Q2_10to1_50B.09536.09536.4	0.04	R.M[147.04]HSAGK[425.27]GISSSAIPYSR.N	YDR064W	2061.04	126.127	52018.1	127.13	9782.27	56331.4	5812.69	0.103187	9.6911
1	JL033021_040221_RPA2HFH_Q2_10to1_50B.09544.09544.3	0.000467	R.M[147.04]HSAGK[425.27]GISSSAIPYSR.N	YDR064W	2061.04	126.127	59892.8	127.13	10193.5	64867.9	5546.43	0.0855034	11.6954
1	JL033021_040221_RPA2HFH_Q2_10to1_50B.09577.09577.3	0.000551	R.ALM[147.04]QLK[425.27]YM[147.04]R.S	YOR341W	1481.78	126.127	380252	127.13	63700.5	411847	34124	0.082856	12.0691
1	JL033021_040221_RPA2HFH_Q2_10to1_50B.09624.09624.3	0.0158	R.K[425.27]FGHAYEAFK.L	YJR007W	1493.77	126.127	61124.3	127.13	10967.1	66197	6264.83	0.0946391	10.5665
0.9997	JL033021_040221_RPA2HFH_Q2_10to1_50B.09625.09625.4	0.0465	R.TASAQLEGGVHNLHSYEK[425.27]R.L	YHR216W,YLR432W,YML056C	2393.22	126.127	54425.9	127.13	9065.57	58948.5	4828.53	0.0819111	12.2084
0.9701	JL033021_040221_RPA2HFH_Q2_10to1_50B.09769.09769.3	0.182	R.STGPVNSLTM[147.04]QPVK[425.27]GR.K	YPR010C	1984.05	126.127	186119	127.13	33375.5	201566	19056.2	0.0945406	10.5775
0.9994	JL033021_040221_RPA2HFH_Q2_10to1_50B.09777.09777.4	0.049	R.RTPQIGDK[425.27]FSSR.H	YPR010C	1687.91	126.127	234527	127.13	43574.8	253978	25639.8	0.100953	9.90561
0.9776	JL033021_040221_RPA2HFH_Q2_10to1_50B.09788.09788.3	0.83	R.YNPLEK[425.27]RD.-	YOR210W	1330.7	126.127	206874	127.13	43898.5	223987	28469.1	0.127102	7.86771
0.9729	JL033021_040221_RPA2HFH_Q2_10to1_50B.09818.09818.3	0.264	R.ALM[147.04]QLK[425.27]YM[147.04]R.S	YOR341W	1481.78	126.127	83971.5	127.13	16514.9	90928.4	10158.7	0.111722	8.95078
0.9883	JL033021_040221_RPA2HFH_Q2_10to1_50B.09880.09880.3	0.0299	R.IKK[407.26]YASVVR.V	YOR063W	1341.82	126.127	166111	127.13	33584.4	179866	21076.1	0.117177	8.5341
0.9506	JL033021_040221_RPA2HFH_Q2_10to1_50B.09903.09903.3	0.0905	R.NILAEK[425.27]PR.V	YJL115W	1236.73	126.127	275784	127.13	48398.4	298680	27104.9	0.0907491	11.0194
0.9998	JL033021_040221_RPA2HFH_Q2_10to1_50B.09904.09904.3	0.0175	K.FTEK[425.27]IK[425.27]SM[147.04].-	YNL113W	1592.86	126.127	181127	127.13	40639.8	196091	27288.6	0.139163	7.18583
0.9998	JL033021_040221_RPA2HFH_Q2_10to1_50B.09931.09931.4	0.013	R.RTPQIGDK[425.27]FSSR.H	YPR010C	1687.91	126.127	419403	127.13	77285.9	454192	45167.2	0.0994452	10.0558
0.9638	JL033021_040221_RPA2HFH_Q2_10to1_50B.10005.10005.3	0.157	K.QVDNDLGK[425.27]GRRLC[160.03]VE.F	YPL043W	2055.06	126.127	82673.9	127.13	11791.9	89560.1	5214.08	0.0582188	17.1766
0.9995	JL033021_040221_RPA2HFH_Q2_10to1_50B.10048.10048.3	0.0224	K.STGK[425.27]SSNITISNAVGR.L	YDL229W,YNL209W	1888.01	126.127	42275.9	127.131	6654.68	45792.1	3335.8	0.0728467	13.7275
1	JL033021_040221_RPA2HFH_Q2_10to1_50B.10110.10110.3	0.00623	R.STGPVNSLTM[147.04]QPVK[425.27]GR.K	YPR010C	1984.05	126.127	170573	127.13	30212.9	184732	17062.8	0.0923653	10.8266
1	JL033021_040221_RPA2HFH_Q2_10to1_50B.10201.10201.4	4.34e-06	R.STGPVNSLTM[147.04]QPVK[425.27]GR.K	YPR010C	1984.05	126.127	81876	127.13	12841.4	88686.2	6410.35	0.0722813	13.8348
1	JL033021_040221_RPA2HFH_Q2_10to1_50B.10278.10278.3	1.34e-05	R.STGPVNSLTM[147.04]QPVK[425.27]GR.K	YPR010C	1984.05	126.127	340417	127.13	61101.1	368668	34914.6	0.0947047	10.5591
1	JL033021_040221_RPA2HFH_Q2_10to1_50B.10279.10279.3	7.6e-05	R.GAVSGQK[425.27]AGLIAAR.R	YFR031C-A,YIL018W	1594.92	126.127	92993.6	127.131	18834.2	100693	11834.1	0.117526	8.50875
0.9999	JL033021_040221_RPA2HFH_Q2_10to1_50B.10348.10348.3	0.0554	R.AFQK[425.27]QPHIFNNPK.V	YBR048W,YDR025W	1865	126.127	75694.9	127.13	14362.9	81970.5	8595.68	0.104863	9.53624
0.9711	JL033021_040221_RPA2HFH_Q2_10to1_50B.10383.10383.5	0.000804	K.TATEVTPQEPK[425.27]HIQEEEEQDVDM[147.04]TGDEEQEEEPDREK.L	YNL113W	4667.05	126.127	32937.3	127.13	5208.84	35676.6	2624.82	0.0735727	13.592
1	JL033021_040221_RPA2HFH_Q2_10to1_50B.10386.10386.3	0.000135	R.M[147.04]DAFK[425.27]NHGLYYR.S	YPR159W	1826.89	126.127	85699.9	127.13	14845.2	92816.6	8214.27	0.0885	11.2994
1	JL033021_040221_RPA2HFH_Q2_10to1_50B.10388.10388.4	0.000322	R.M[147.04]DAFK[425.27]NHGLYYR.S	YPR159W	1826.89	126.127	74166.1	127.13	13490.7	80319.7	7798.34	0.0970913	10.2996
1	JL033021_040221_RPA2HFH_Q2_10to1_50B.10396.10396.5	1.74e-07	K.TATEVTPQEPK[425.27]HIQEEEEQDVDM[147.04]TGDEEQEEEPDREK.L	YNL113W	4667.05	126.127	32183.7	127.13	6058.63	34852.2	3603.1	0.103382	9.67286
0.9999	JL033021_040221_RPA2HFH_Q2_10to1_50B.10406.10406.4	0.0294	K.TATEVTPQEPK[425.27]HIQEEEEQDVDM[147.04]TGDEEQEEEPDREK.L	YNL113W	4667.05	126.127	9944.03	127.13	2289.51	10765.1	1560.69	0.144976	6.89768
0.9933	JL033021_040221_RPA2HFH_Q2_10to1_50B.10407.10407.3	0.289	R.TPQIGDK[425.27]FSSR.H	YPR010C	1531.81	126.127	73322.7	127.13	12816.7	79410.6	7151.78	0.0900608	11.1036
1	JL033021_040221_RPA2HFH_Q2_10to1_50B.10408.10408.3	5.86e-12	K.K[425.27]LDGSNEASANDEESFDVGR.N	YOR341W	2436.11	126.127	83748.9	127.13	13959.4	90708	7440.23	0.082024	12.1916
1	JL033021_040221_RPA2HFH_Q2_10to1_50B.10411.10411.3	9.18e-16	K.TK[425.27]QAVSYDEPDEDEIETM[147.04]R.E	YOR341W	2568.16	126.127	68210.6	127.131	11682	73876	6394.76	0.0865606	11.5526
0.9675	JL033021_040221_RPA2HFH_Q2_10to1_50B.10414.10414.3	0.875	R.TPQIGDK[425.27]FSSR.H	YPR010C	1531.81	126.127	78051.1	127.13	12963.4	84537.1	6884.53	0.0814379	12.2793
0.9929	JL033021_040221_RPA2HFH_Q2_10to1_50B.10423.10423.3	0.367	R.HAIK[425.27]QFLSR.V	YDR170C	1395.81	126.128	141956	127.131	25160.5	153740	14217.7	0.0924792	10.8132
1	JL033021_040221_RPA2HFH_Q2_10to1_50B.10443.10443.3	8.74e-12	K.K[425.27]LDGSNEASANDEESFDVGR.N	YOR341W	2436.11	126.127	69027.1	127.13	11887	74759.8	6541.16	0.0874956	11.4291
1	JL033021_040221_RPA2HFH_Q2_10to1_50B.10462.10462.3	0.000618	R.LIGDAAK[425.27]NQAALNPR.N	YDL229W,YNL209W	1848.03	126.127	109798	127.131	18422.4	118921	9884.23	0.0831163	12.0313
1	JL033021_040221_RPA2HFH_Q2_10to1_50B.10485.10485.3	0.000247	K.TK[425.27]QAVSYDEPDEDEIETM[147.04]R.E	YOR341W	2568.16	126.127	54280.4	127.13	8111.88	58798.6	3819.64	0.0649613	15.3938
0.9969	JL033021_040221_RPA2HFH_Q2_10to1_50B.10591.10591.3	6.62e-12	K.KTK[407.26]QAVSYDEPDEDEIETM[147.04]R.E	YOR341W	2678.25	126.126	62135.2	127.13	10943.5	67293.5	6148.78	0.0913726	10.9442
0.9962	JL033021_040221_RPA2HFH_Q2_10to1_50B.10596.10596.3	3.22e-10	K.KTK[407.26]QAVSYDEPDEDEIETM[147.04]R.E	YOR341W	2678.25	126.126	67704.3	127.13	10549.2	73336.3	5226.35	0.0712655	14.032
0.999	JL033021_040221_RPA2HFH_Q2_10to1_50B.10615.10615.4	0.00295	F.TPQERLIGDAAK[425.27]NQAALNPR.N	YNL209W	2459.33	126.127	59109.4	127.13	9755.56	64021.9	5147.46	0.0804014	12.4376
1	JL033021_040221_RPA2HFH_Q2_10to1_50B.10633.10633.3	0.000473	R.APK[425.27]GQNTLILR.G	YNL301C,YOL120C	1506.9	126.127	65991.5	127.13	11930.6	71467.5	6860.32	0.0959922	10.4175
1	JL033021_040221_RPA2HFH_Q2_10to1_50B.10635.10635.3	0.00118	R.LIGDAAK[425.27]NQAALNPR.N	YDL229W,YNL209W	1848.03	126.127	79841	127.13	14619.3	86464.7	8498.21	0.0982854	10.1745
0.9644	JL033021_040221_RPA2HFH_Q2_10to1_50B.10654.10654.5	1.9e-05	R.LEEDNDEEQSHKK[425.27]TK[407.26]QAVSYDEPDEDEIETM[147.04]R.E	YOR341W	4429.02	126.126	55052.8	127.129	9569.89	59624.2	5312.67	0.0891025	11.223
0.9776	JL033021_040221_RPA2HFH_Q2_10to1_50B.10671.10671.5	6.2e-07	R.LEEDNDEEQSHK[425.27]KTK[407.26]QAVSYDEPDEDEIETM[147.04]R.E	YOR341W	4429.02	126.127	71476.3	127.13	13424.8	77403.2	7969.17	0.102957	9.71283
0.9869	JL033021_040221_RPA2HFH_Q2_10to1_50B.10691.10691.3	1.87e-07	K.KK[407.26]TGLDISDDAR.A	YDL229W,YNL209W	1596.86	126.127	54870.6	127.13	9256.4	59429.2	4993.1	0.0840176	11.9023
1	JL033021_040221_RPA2HFH_Q2_10to1_50B.10725.10725.3	0.000369	R.DLK[425.27]FEPQGR.Q	YPR110C	1385.74	126.127	100272	127.13	19862.9	108578	12283	0.113126	8.83968
0.9873	JL033021_040221_RPA2HFH_Q2_10to1_50B.10777.10777.5	5.42e-09	R.NPDAPK[425.27]GSTDPKELYNNAHVYAR.D	YPR110C	2853.41	126.127	62178.6	127.131	14199.8	67313.8	9634.3	0.143125	6.98689
0.9999	JL033021_040221_RPA2HFH_Q2_10to1_50B.10793.10793.3	0.0136	K.TNIAHAISK[425.27]IR.G	YBL017C	1519.89	126.127	111157	127.13	20831.8	120375	12344	0.102546	9.7517
1	JL033021_040221_RPA2HFH_Q2_10to1_50B.10884.10884.3	0.000742	R.DLK[425.27]FEPQGR.Q	YPR110C	1385.74	126.127	118295	127.13	22315.1	128103	13292.9	0.103767	9.63696
0.9768	JL033021_040221_RPA2HFH_Q2_10to1_50B.10910.10910.3	2.9e-07	R.AADTPETSDAVHTEQK[407.26]PEEEKETLQEE.-	YBR279W	3319.53	126.127	48057.9	127.13	8680.44	52045.8	4987.51	0.0958293	10.4352
1	JL033021_040221_RPA2HFH_Q2_10to1_50B.10919.10919.3	4.96e-05	R.TPQIGDK[425.27]FSSR.H	YPR010C	1531.81	126.127	184574	127.13	33352.4	199890	19170.1	0.0959034	10.4272
1	JL033021_040221_RPA2HFH_Q2_10to1_50B.10968.10968.4	3.31e-05	R.NPTTRPK[425.27]TGSTYILSTEVK.N	YOR341W	2389.29	126.127	97846.5	127.131	18889.6	105956	11457.8	0.108137	9.24752
1	JL033021_040221_RPA2HFH_Q2_10to1_50B.10971.10971.3	4.3e-07	R.TDILK[425.27]TSVDTGR.E	YOR341W	1601.87	126.127	469112	127.13	85406.9	508034	49406.9	0.0972511	10.2827
0.9932	JL033021_040221_RPA2HFH_Q2_10to1_50B.10974.10974.3	0.0673	R.NPTTRPK[425.27]TGSTYILSTEVK.N	YOR341W	2389.29	126.127	136388	127.131	22157.9	147725	11500.1	0.0778481	12.8455
0.9901	JL033021_040221_RPA2HFH_Q2_10to1_50B.11005.11005.3	4.85e-05	R.K[407.26]KVM[147.04]PAIVVR.Q	YBL087C,YER117W	1434.88	126.127	62616.4	127.13	12074	67806	7317.06	0.107912	9.26683
0.9815	JL033021_040221_RPA2HFH_Q2_10to1_50B.11011.11011.5	2.39e-08	R.LEEDNDEEQSHK[407.26]K[425.27]TKQAVSYDEPDEDEIETM[147.04]R.E	YOR341W	4429.02	126.127	75690.5	127.13	13868.8	81969.8	8066.63	0.0984098	10.1616
1	JL033021_040221_RPA2HFH_Q2_10to1_50B.11034.11034.3	0.000177	R.DLK[425.27]FEPQGR.Q	YPR110C	1385.74	126.127	68590.2	127.13	16380.3	74248.9	11395.3	0.153474	6.51575
0.9803	JL033021_040221_RPA2HFH_Q2_10to1_50B.11066.11066.5	1.17e-08	R.LEEDNDEEQSHK[407.26]K[425.27]TKQAVSYDEPDEDEIETM[147.04]R.E	YOR341W	4429.02	126.127	76316.4	127.13	14468.8	82643.5	8653.35	0.104707	9.55046
1	JL033021_040221_RPA2HFH_Q2_10to1_50B.11068.11068.3	0.00243	R.TPQIGDK[425.27]FSSR.H	YPR010C	1531.81	126.127	128730	127.13	24351.1	139403	14537.7	0.104286	9.58902
0.9751	JL033021_040221_RPA2HFH_Q2_10to1_50B.11084.11084.5	2.47e-07	R.LEEDNDEEQSHK[407.26]K[425.27]TKQAVSYDEPDEDEIETM[147.04]R.E	YOR341W	4429.02	126.127	69639.9	127.13	12929.4	75415.7	7603.17	0.100817	9.91899
1	JL033021_040221_RPA2HFH_Q2_10to1_50B.11152.11152.5	4.67e-10	R.K[425.27]ALANQLLTPSSNVSTHTLNKK.V	YOR341W	2661.49	126.127	114406	127.13	22085.4	123888	13395.7	0.108128	9.24832
1	JL033021_040221_RPA2HFH_Q2_10to1_50B.11159.11159.4	3.5e-08	R.K[425.27]ALANQLLTPSSNVSTHTLNKK.V	YOR341W	2661.49	126.127	93130.2	127.131	15790.3	100867	8560.06	0.0848651	11.7834
0.981	JL033021_040221_RPA2HFH_Q2_10to1_50B.11160.11160.3	0.000192	R.KK[407.26]VM[147.04]PAIVVR.Q	YBL087C,YER117W	1434.88	126.127	72560.8	127.13	13557.2	78578.2	8013.63	0.101983	9.80557
1	JL033021_040221_RPA2HFH_Q2_10to1_50B.11168.11168.3	1.95e-11	R.K[425.27]ALANQLLTPSSNVSTHTLNKK.V	YOR341W	2661.49	126.127	93616.4	127.13	14873.8	101402	7534.3	0.0743017	13.4586
0.9902	JL033021_040221_RPA2HFH_Q2_10to1_50B.11169.11169.3	4.12e-05	R.KK[407.26]VM[147.04]PAIVVR.Q	YBL087C,YER117W	1434.88	126.127	79973.7	127.13	15176.5	86603.9	9083.41	0.104885	9.53429
0.9576	JL033021_040221_RPA2HFH_Q2_10to1_50B.11212.11212.5	0.00143	R.AGM[147.04]IKPDETTFQYTK[425.27]GRPLAPK.G	YGL009C	2761.46	126.128	85612.6	127.131	14701.7	92723	8068.37	0.0870158	11.4922
1	JL033021_040221_RPA2HFH_Q2_10to1_50B.11215.11215.3	0.00687	R.TSGK[425.27]VPIPGVK.Q	YOR341W	1378.83	126.127	54548	127.13	8631.03	59084.5	4351.93	0.0736562	13.5766
1	JL033021_040221_RPA2HFH_Q2_10to1_50B.11216.11216.3	0.000378	R.AGM[147.04]IK[425.27]PDETTFQYTK.G	YGL009C	2042.01	126.126	70537	127.13	11548.3	76400	6042.65	0.0790922	12.6435
0.9718	JL033021_040221_RPA2HFH_Q2_10to1_50B.11229.11229.4	0.000681	R.ALDNSQM[147.04]IK[425.27]PSLHSLSNK.T	YGL244W	2295.2	126.127	43253.5	127.13	10101.7	46823.8	6941.85	0.148255	6.74515
0.9986	JL033021_040221_RPA2HFH_Q2_10to1_50B.11246.11246.3	0.235	R.VTPTK[425.27]TEVIIR.A	YNL178W	1552.93	126.127	72857.5	127.131	13638.8	78899.3	8074.51	0.102339	9.77141
0.9951	JL033021_040221_RPA2HFH_Q2_10to1_50B.11257.11257.3	2.08e-05	R.SQAESLPIVSNK[425.27]K.L	YOR340C	1696.94	126.128	61198.9	127.131	10469.4	66282	5724.83	0.0863707	11.578
1	JL033021_040221_RPA2HFH_Q2_10to1_50B.11262.11262.3	2.34e-05	K.TEK[425.27]VDLALNR.N	YPR010C	1454.82	126.127	83577.6	127.131	13653.2	90524.8	7127.47	0.0787349	12.7008
0.9693	JL033021_040221_RPA2HFH_Q2_10to1_50B.11307.11307.5	0.264	R.K[425.27]ALANQLLTPSSNVSTHTLNKK.V	YOR341W	2661.49	126.127	100671	127.13	18638.8	109021	10935.4	0.100305	9.96957
0.9994	JL033021_040221_RPA2HFH_Q2_10to1_50B.11308.11308.3	0.000576	N.NK[425.27]SGILDAVTSSK.V	YOR341W	1615.89	126.127	55704.1	127.13	10605.2	60322	6363.59	0.105494	9.47925
1	JL033021_040221_RPA2HFH_Q2_10to1_50B.11318.11318.3	0.00989	R.TDILK[407.26]TSVDTGR.E	YOR341W	1583.86	126.126	79009.3	127.13	14792	85561.2	8757.93	0.102359	9.76958
0.9926	JL033021_040221_RPA2HFH_Q2_10to1_50B.11322.11322.4	0.119	R.AADTPETSDAVHTEQK[425.27]PEEEK[425.27]ETLQEE.-	YBR279W	3634.72	126.127	64926.3	127.13	13168.7	70302	8282.73	0.117816	8.48778
0.9992	JL033021_040221_RPA2HFH_Q2_10to1_50B.11330.11330.4	0.074	R.AADTPETSDAVHTEQK[425.27]PEEEK[425.27]ETLQEE.-	YBR279W	3634.72	126.126	58393.3	127.13	13482.9	63214.6	9205.87	0.145629	6.86677
1	JL033021_040221_RPA2HFH_Q2_10to1_50B.11351.11351.3	0.00247	R.K[425.27]HFPSINTSVSYSK.Y	YDL185W	1890.99	126.127	76260.7	127.13	14599.3	82582.1	8798.15	0.106538	9.38631
1	JL033021_040221_RPA2HFH_Q2_10to1_50B.11376.11376.3	0.000271	R.TSGK[425.27]VPIPGVK.Q	YOR341W	1378.83	126.127	34084.4	127.131	6275.35	36911.7	3664.7	0.0992827	10.0722
0.9652	JL033021_040221_RPA2HFH_Q2_10to1_50B.11386.11386.3	0.292	R.GKLLLK[425.27]IK.W	YPR010C	1208.83	126.127	150056	127.131	28284.2	162498	16837.8	0.103619	9.65078
1	JL033021_040221_RPA2HFH_Q2_10to1_50B.11403.11403.3	0.000657	R.YASK[425.27]EM[147.04]SATFSLR.N	YLR359W	1802.9	126.127	54500.6	127.13	8550.46	59033.7	4269.85	0.0723289	13.8257
0.9787	JL033021_040221_RPA2HFH_Q2_10to1_50B.11409.11409.3	0.00254	R.SQAESLPIVSNK[425.27]K.L	YOR340C	1696.94	126.126	42734.3	127.13	7770.71	46280	4490.58	0.0970307	10.306
1	JL033021_040221_RPA2HFH_Q2_10to1_50B.11449.11449.3	0.0017	K.TEK[425.27]VDLALNR.N	YPR010C	1454.82	126.127	67149.4	127.13	12803.6	72716	7691.87	0.10578	9.45362
1	JL033021_040221_RPA2HFH_Q2_10to1_50B.11475.11475.3	0.000788	K.IASTAK[425.27]DNAPLQFDK.V	YJL148W	1915.01	126.127	50644.7	127.13	8603.88	54851.7	4673.24	0.0851977	11.7374
1	JL033021_040221_RPA2HFH_Q2_10to1_50B.11489.11489.3	0.000162	K.IASTAK[425.27]DNAPLQFDK.V	YJL148W	1915.01	126.126	52677.8	127.13	10090.9	57044.3	6084.14	0.106656	9.3759
1	JL033021_040221_RPA2HFH_Q2_10to1_50B.11534.11534.3	0.00113	R.DLK[425.27]FEPQGR.Q	YPR110C	1385.74	126.127	34470.5	127.13	6041.78	37332.4	3379.74	0.0905311	11.0459
0.9999	JL033021_040221_RPA2HFH_Q2_10to1_50B.11578.11578.4	1.24e-08	K.GSTDPK[425.27]ELYNNAHVYAR.D	YPR110C	2231.11	126.127	73400.5	127.131	13322.2	79490.8	7686.47	0.0966964	10.3417
1	JL033021_040221_RPA2HFH_Q2_10to1_50B.11604.11604.3	3.24e-06	K.K[425.27]EFEHIGGVIGAR.V	YGR159C	1708.93	126.127	65322.7	127.13	13148.9	70732.1	8225.91	0.116297	8.5987
1	JL033021_040221_RPA2HFH_Q2_10to1_50B.11620.11620.4	2.93e-07	K.K[425.27]EFEHIGGVIGAR.V	YGR159C	1708.93	126.127	67472.5	127.13	10985.3	73081.3	5714.48	0.0781935	12.7888
0.996	JL033021_040221_RPA2HFH_Q2_10to1_50B.11641.11641.3	0.00171	R.EGLIDTAVK[425.27]TSR.S	YOR341W	1585.88	126.127	86956.3	127.131	17691.7	94155.6	11151.8	0.11844	8.44308
1	JL033021_040221_RPA2HFH_Q2_10to1_50B.11796.11796.4	0.00185	R.LNDK[425.27]DGIAYYKPLR.S	YBR279W	1962.07	126.127	53896.7	127.13	9307.4	58372.6	5135.18	0.0879725	11.3672
0.997	JL033021_040221_RPA2HFH_Q2_10to1_50B.11874.11874.3	0.0319	R.VNTK[425.27]TGEIVNRD.E	YDR057W	1641.88	126.127	26444.4	127.131	5343.82	28634.1	3352.35	0.117075	8.54151
1	JL033021_040221_RPA2HFH_Q2_10to1_50B.11891.11891.3	1.5e-06	R.AVLK[425.27]FAAHTGATPIAGR.F	YGR214W,YLR048W	1977.12	126.127	73516.3	127.13	14455.1	79607	8890.08	0.111675	8.95458
1	JL033021_040221_RPA2HFH_Q2_10to1_50B.11900.11900.4	8.25e-08	R.AVLK[425.27]FAAHTGATPIAGR.F	YGR214W,YLR048W	1977.12	126.127	58135	127.13	12286.8	62944.3	7947.33	0.12626	7.92019
1	JL033021_040221_RPA2HFH_Q2_10to1_50B.11935.11935.3	3.09e-05	R.PK[425.27]TGSTYILSTEVK.N	YOR341W	1820	126.127	43700.4	127.131	8805.23	47319.2	5512.41	0.116494	8.58412
1	JL033021_040221_RPA2HFH_Q2_10to1_50B.11943.11943.3	3.71e-08	R.PK[425.27]TGSTYILSTEVK.N	YOR341W	1820	126.127	51497.9	127.131	9744	55767.6	5818.39	0.104333	9.58471
1	JL033021_040221_RPA2HFH_Q2_10to1_50B.11961.11961.4	4.42e-10	R.VLSHQAAAVVK[425.27]EEGGENDLIER.V	YLR359W	2660.39	126.127	40910.5	127.13	7131.49	44307.4	3969.32	0.089586	11.1625
1	JL033021_040221_RPA2HFH_Q2_10to1_50B.11982.11982.4	0.00393	K.DGETTDANGK[425.27]TIVTGGNGPEDFQQHEQIR.R	YPR187W	3410.61	126.127	42541.2	127.13	8413.04	46065.2	5196.22	0.112801	8.86515
1	JL033021_040221_RPA2HFH_Q2_10to1_50B.11997.11997.4	0.00386	R.ASGNYVIIIGHNPDENK[425.27]TR.V	YFR031C-A,YIL018W	2394.24	126.127	35634.7	127.13	5178.01	38602.1	2349.63	0.060868	16.429
1	JL033021_040221_RPA2HFH_Q2_10to1_50B.12017.12017.4	5.34e-10	R.LPSK[425.27]LGEEVHENSQNQLLSK.V	YOR341W	2546.34	126.127	51044.2	127.13	9453.37	55277.9	5547.67	0.10036	9.96416
1	JL033021_040221_RPA2HFH_Q2_10to1_50B.12019.12019.3	0.000531	R.LPSK[425.27]LGEEVHENSQNQLLSK.V	YOR341W	2546.34	126.127	60005.5	127.13	11361.4	64980.5	6787.78	0.104459	9.57316
1	JL033021_040221_RPA2HFH_Q2_10to1_50B.12057.12057.3	1.2e-06	R.SRNTASFAGSKK[407.26]TFD.-	YGR159C	1894.96	126.127	74285.6	127.13	14468.8	80441.2	8835.67	0.10984	9.10414
1	JL033021_040221_RPA2HFH_Q2_10to1_50B.12112.12112.3	9.1e-08	R.EAAAEVTNLDK[425.27]DTPADDPELLKR.L	YOR341W	2807.43	126.127	31152.6	127.13	5520.67	33738.5	3119.19	0.0924519	10.8164
1	JL033021_040221_RPA2HFH_Q2_10to1_50B.12125.12125.4	0.000152	R.EAAAEVTNLDK[425.27]DTPADDPELLKR.L	YOR341W	2807.43	126.127	31880.8	127.131	6517.68	34520.1	4122.2	0.119414	8.3742
1	JL033021_040221_RPA2HFH_Q2_10to1_50B.12128.12128.3	1.7e-06	R.EAAAEVTNLDK[407.26]DTPADDPELLKR.L	YOR341W	2789.42	126.127	33343.5	127.13	6961.94	36102.6	4466.95	0.123729	8.08217
0.9999	JL033021_040221_RPA2HFH_Q2_10to1_50B.12182.12182.3	0.00382	R.EK[425.27]YSFLEGGSK.L	YGL009C	1540.79	126.127	90790.4	127.13	16042.8	98327.1	9040.71	0.0919453	10.876
0.9593	JL033021_040221_RPA2HFH_Q2_10to1_50B.12183.12183.3	3.63e-06	K.VNAITSQVVSK[425.27]C[160.03]VPDGTM[147.04]K.K	YOR341W	2346.2	126.127	73111.3	127.13	15241.3	79161.3	9768.9	0.123405	8.1034
1	JL033021_040221_RPA2HFH_Q2_10to1_50B.12199.12199.4	4.19e-09	R.HIIPSK[425.27]ANVNETASHNEIFYAR.L	YOR123C	2807.44	126.127	95742	127.131	19750	103667	12568.7	0.121242	8.24798
0.9812	JL033021_040221_RPA2HFH_Q2_10to1_50B.12205.12205.5	3.33e-05	R.IVLVHLGK[425.27]DGSQDKFR.M	YPR010C	2108.18	126.127	197611	127.13	36448.4	214003	21317.3	0.0996123	10.0389
1	JL033021_040221_RPA2HFH_Q2_10to1_50B.12210.12210.5	9.17e-15	R.HIIPSK[425.27]ANVNETASHNEIFYAR.L	YOR123C	2807.44	126.127	69875	127.13	12726.1	75672.4	7364.14	0.0973161	10.2758
1	JL033021_040221_RPA2HFH_Q2_10to1_50B.12229.12229.3	0.017	R.EGLIDTAVK[407.26]TSR.S	YOR341W	1567.87	126.127	57876.9	127.13	11632.2	62669.9	7269.04	0.115989	8.62148
0.9979	JL033021_040221_RPA2HFH_Q2_10to1_50B.12234.12234.3	0.033	R.HIIPSK[425.27]ANVNETASHNEIFYAR.L	YOR123C	2807.44	126.127	57229.3	127.13	11129.2	61971.6	6788.2	0.109537	9.12932
1	JL033021_040221_RPA2HFH_Q2_10to1_50B.12239.12239.3	7.03e-11	R.K[425.27]ALANQLLTPSSNVSTHTLNK.K	YOR341W	2533.39	126.127	77371.8	127.13	15200.9	83782	9343.14	0.111517	8.96722
1	JL033021_040221_RPA2HFH_Q2_10to1_50B.12241.12241.5	3.4e-05	R.NPDAPK[425.27]GSTDPK[425.27]ELYNNAHVYAR.D	YPR110C	3150.59	126.127	120100	127.131	25923.8	130031	16997.7	0.130721	7.64988
1	JL033021_040221_RPA2HFH_Q2_10to1_50B.12242.12242.4	4.48e-11	R.K[425.27]ALANQLLTPSSNVSTHTLNK.K	YOR341W	2533.39	126.127	67866.2	127.131	12646.7	73494.6	7459.44	0.101496	9.85257
1	JL033021_040221_RPA2HFH_Q2_10to1_50B.12249.12249.3	0.119	R.EGLIDTAVK[407.26]TSR.S	YOR341W	1567.87	126.127	65392	127.13	11915.8	70817.5	6898.33	0.0974101	10.2659
0.9525	JL033021_040221_RPA2HFH_Q2_10to1_50B.12263.12263.3	7.71e-05	R.IVLVHLGK[425.27]DGSQDKFR.M	YPR010C	2108.18	126.128	129527	127.131	26344.5	140251	16602.3	0.118375	8.4477
1	JL033021_040221_RPA2HFH_Q2_10to1_50B.12264.12264.4	1.66e-06	R.NPDAPK[425.27]GSTDPK[425.27]ELYNNAHVYAR.D	YPR110C	3150.59	126.127	85989	127.13	17834.7	93105.4	11391.9	0.122354	8.17298
0.9998	JL033021_040221_RPA2HFH_Q2_10to1_50B.12271.12271.5	0.048	R.K[425.27]ALANQLLTPSSNVSTHTLNK[425.27].K	YOR341W	2830.57	126.127	43988.2	127.13	8435.27	47634.4	5090.14	0.106858	9.35817
1	JL033021_040221_RPA2HFH_Q2_10to1_50B.12274.12274.5	4.14e-06	R.NPDAPK[425.27]GSTDPK[425.27]ELYNNAHVYAR.D	YPR110C	3150.59	126.127	151349	127.13	31541.5	163874	20212.2	0.12334	8.10766
0.9851	JL033021_040221_RPA2HFH_Q2_10to1_50B.12291.12291.4	0.143	R.K[425.27]ALANQLLTPSSNVSTHTLNK[425.27].K	YOR341W	2830.57	126.127	42995	127.13	7980.83	46561	4692.32	0.100778	9.92281
0.9822	JL033021_040221_RPA2HFH_Q2_10to1_50B.12303.12303.3	1.54e-06	K.APVLVSK[425.27]VVSK.S	YNL248C	1422.89	126.127	55074.6	127.13	10306.3	59641.8	6099.82	0.102274	9.77763
0.9791	JL033021_040221_RPA2HFH_Q2_10to1_50B.12332.12332.3	3.12e-07	K.VTAVEKSTGK[407.26]SSNITISNAVGR.L	YDL229W,YNL209W	2497.36	126.127	41397.8	127.13	7023.07	44836.7	3809.39	0.0849614	11.7701
0.9686	JL033021_040221_RPA2HFH_Q2_10to1_50B.12343.12343.3	7.95e-06	K.ILDADPLSK[425.27]EDTSEK.L	YOR340C	1957	126.127	60903.2	127.13	10251.3	65963.1	5517.7	0.0836483	11.9548
0.9646	JL033021_040221_RPA2HFH_Q2_10to1_50B.12384.12384.5	0.00265	R.ITM[147.04]AALNPEAIDEENK[425.27]PSTLRIIKR.N	YML074C	3135.7	126.127	62543.4	127.13	12970.3	67719.4	8284.03	0.122329	8.1747
1	JL033021_040221_RPA2HFH_Q2_10to1_50B.12399.12399.3	4.71e-10	R.K[425.27]ALANQLLTPSSNVSTHTLNK.K	YOR341W	2533.39	126.127	64986.2	127.13	13922.3	70360.8	9084.9	0.129119	7.7448
1	JL033021_040221_RPA2HFH_Q2_10to1_50B.12400.12400.4	1.04e-10	R.K[425.27]ALANQLLTPSSNVSTHTLNK.K	YOR341W	2533.39	126.127	51669.3	127.131	12907.1	55927.3	9192.57	0.164366	6.08397
1	JL033021_040221_RPA2HFH_Q2_10to1_50B.12407.12407.4	1.96e-06	R.IPTHPETEQPK[425.27]GFGYVQFSNM[147.04]EDAKK.A	YGR159C	3290.6	126.127	36859.5	127.13	4626.13	39934.8	1648.3	0.0412747	24.2279
1	JL033021_040221_RPA2HFH_Q2_10to1_50B.12439.12439.3	0.000179	R.VGK[425.27]NDVAVVLR.V	YJR007W	1465.87	126.127	31083.1	127.13	5098.34	33666.6	2672.87	0.0793924	12.5957
0.9968	JL033021_040221_RPA2HFH_Q2_10to1_50B.12455.12455.3	0.277	M.GEEHK[407.26]PLLDASGVDPR.E	YDL126C	1998.03	126.127	53354	127.13	10475.1	57774.4	6435.19	0.111385	8.97789
1	JL033021_040221_RPA2HFH_Q2_10to1_50B.12467.12467.3	1.94e-09	R.LIGDAAK[425.27]NQAAM[147.04]NPSNTVFDAK.R	YAL005C	2588.3	126.127	53216.8	127.13	8120.53	57645.1	3924.39	0.0680785	14.6889
0.9978	JL033021_040221_RPA2HFH_Q2_10to1_50B.12488.12488.4	0.217	R.QIRPPIYSLK[425.27]QTR.L	YLR342W	1896.1	126.127	72734.4	127.131	12693.2	78773.6	7072.23	0.0897792	11.1384
1	JL033021_040221_RPA2HFH_Q2_10to1_50B.12499.12499.5	0.000821	R.KALANQLLTPSSNVSTHTLNK[425.27]K[425.27]VYR.H	YOR341W	3376.9	126.127	86132.6	127.13	13286.7	93298.7	6505.38	0.0697263	14.3418
1	JL033021_040221_RPA2HFH_Q2_10to1_50B.12507.12507.3	1.6e-06	R.LIGDAAK[425.27]NQAAM[147.04]NPSNTVFDAK.R	YAL005C	2588.3	126.127	45948.6	127.13	7227.44	49770.3	3619.86	0.0727314	13.7492
0.9973	JL033021_040221_RPA2HFH_Q2_10to1_50B.12515.12515.5	1.23e-06	R.K[425.27]ALANQLLTPSSNVSTHTLNK[425.27]K.V	YOR341W	2958.67	126.127	54133.8	127.13	10163.4	58622.6	6031.12	0.10288	9.72002
0.9984	JL033021_040221_RPA2HFH_Q2_10to1_50B.12522.12522.5	4.79e-09	R.K[425.27]ALANQLLTPSSNVSTHTLNK[425.27]K.V	YOR341W	2958.67	126.127	67629.8	127.131	12556.1	73238.9	7383.61	0.100815	9.91912
0.9689	JL033021_040221_RPA2HFH_Q2_10to1_50B.12527.12527.4	5.12e-06	R.K[425.27]ALANQLLTPSSNVSTHTLNK[425.27]K.V	YOR341W	2958.67	126.127	52894.8	127.131	8392.76	57293.6	4245.01	0.0740923	13.4967
1	JL033021_040221_RPA2HFH_Q2_10to1_50B.12546.12546.6	0.0288	R.KALANQLLTPSSNVSTHTLNK[425.27]K[425.27]VYR.H	YOR341W	3376.9	126.127	48054.3	127.13	7835.88	52048.8	4082.82	0.078442	12.7483
1	JL033021_040221_RPA2HFH_Q2_10to1_50B.12552.12552.4	8.63e-05	R.K[425.27]EIELAEHEM[147.04]PGLM[147.04]AIR.K	YER043C	2295.17	126.127	36842.5	127.13	6367.69	39902.1	3516.04	0.0881168	11.3486
0.995	JL033021_040221_RPA2HFH_Q2_10to1_50B.12576.12576.5	0.147	R.KALANQLLTPSSNVSTHTLNK[425.27]K[425.27]VYR.H	YOR341W	3376.9	126.128	54580.6	127.131	9613.17	59111.7	5401.44	0.0913769	10.9437
0.9548	JL033021_040221_RPA2HFH_Q2_10to1_50B.12590.12590.5	0.000537	R.K[425.27]ALANQLLTPSSNVSTHTLNK[425.27]K.V	YOR341W	2958.67	126.127	39544.1	127.13	7277.1	42824.4	4248.02	0.0991962	10.081
1	JL033021_040221_RPA2HFH_Q2_10to1_50B.12670.12670.3	0.00232	K.K[425.27]ALDALQGEYIDNRPVR.L	YGR159C	2254.22	126.127	67519.6	127.131	13212.2	73114	8096.54	0.110739	9.03028
1	JL033021_040221_RPA2HFH_Q2_10to1_50B.12756.12756.3	0.000136	R.VVDLVEHVAK[425.27]A.-	YGR192C,YJR009C	1475.84	126.127	56884.6	127.13	10080.9	61606.5	5695.78	0.0924541	10.8162
0.9996	JL033021_040221_RPA2HFH_Q2_10to1_50B.12842.12842.4	0.000363	Q.RC[160.03]LTK[425.27]QLEGVHVSYDNSIR.D	YOR341W	2571.33	126.127	42119.9	127.13	6575.66	45623.5	3265.14	0.071567	13.9729
1	JL033021_040221_RPA2HFH_Q2_10to1_50B.12843.12843.4	0.00399	R.EAAAEVTNLDK[425.27]DTPADDPELLKR.L	YOR341W	2807.43	126.127	32358.4	127.13	5951.42	35042.7	3472.52	0.0990941	10.0914
1	JL033021_040221_RPA2HFH_Q2_10to1_50B.12845.12845.3	0.000623	R.FITK[425.27]YNFDDESGK.W	YOR341W	1859.9	126.127	41235.6	127.13	6772.91	44663	3555.88	0.0796159	12.5603
0.9543	JL033021_040221_RPA2HFH_Q2_10to1_50B.12894.12894.5	0.0983	K.LSVSVEQVSIAK[425.27]PM[147.04]SNDGVSSAVERKVYPSESR.Q	YPR010C	3847.97	126.127	45500.4	127.13	7834.46	49279.2	4310.57	0.0874723	11.4322
0.9603	JL033021_040221_RPA2HFH_Q2_10to1_50B.12898.12898.5	0.0962	K.LSVSVEQVSIAK[425.27]PM[147.04]SNDGVSSAVERKVYPSESR.Q	YPR010C	3847.97	126.127	46935.3	127.13	9547.74	50821.2	6017.67	0.118409	8.44533
0.9964	JL033021_040221_RPA2HFH_Q2_10to1_50B.12917.12917.3	1.23e-06	K.KQK[407.26]NEETEEPATIFVGR.L	YGR159C	2254.17	126.127	53637.4	127.13	10010	58085.6	5911.39	0.10177	9.82604
1	JL033021_040221_RPA2HFH_Q2_10to1_50B.12984.12984.3	0.000122	K.IFETALNEK[425.27]QITNNR.V	YOR341W	2087.11	126.127	80280.6	127.13	14038.4	86946.2	7836.3	0.0901281	11.0953
1	JL033021_040221_RPA2HFH_Q2_10to1_50B.13007.13007.4	0.00751	R.C[160.03]LTK[425.27]QLEGVHVSYDNSIR.D	YOR341W	2415.23	126.127	30195.6	127.13	5090.12	32704.3	2743.74	0.0838952	11.9196
0.9754	JL033021_040221_RPA2HFH_Q2_10to1_50B.13013.13013.5	0.00152	K.LSVSVEQVSIAKPM[147.04]SNDGVSSAVERK[407.26]VYPSESR.Q	YPR010C	3829.96	126.127	61087.5	127.13	10752.7	66158.9	6038.37	0.0912707	10.9564
1	JL033021_040221_RPA2HFH_Q2_10to1_50B.13049.13049.3	0.000265	R.SK[425.27]FSPLNNAVVAR.F	YDR264C	1698.95	126.127	40425.1	127.13	7568.18	43777.4	4480.85	0.102356	9.76987
0.9981	JL033021_040221_RPA2HFH_Q2_10to1_50B.13068.13068.3	0.102	K.NTISEAGDK[425.27]LEQADKDAVTK.K	YLL024C	2429.24	126.127	56806.3	127.13	11193.2	61512.5	6894.8	0.112088	8.92158
1	JL033021_040221_RPA2HFH_Q2_10to1_50B.13075.13075.3	0.00121	K.K[425.27]IENTM[147.04]LENITLR.G	RPB1-msCTD,YDL140C	1887.02	126.127	52613.8	127.13	9703.52	56978.1	5674.82	0.0995965	10.0405
0.95	JL033021_040221_RPA2HFH_Q2_10to1_50B.13100.13100.3	0.736	R.NFNDPEVQGDM[147.04]K[425.27]HFPFK.L	YLL024C	2362.11	126.127	44131.4	127.13	7328.69	47798.7	3891.49	0.0814141	12.2829
0.9979	JL033021_040221_RPA2HFH_Q2_10to1_50B.13105.13105.3	2.27e-13	R.EAAAEVTNLDK[425.27]DTPADDPELLKR.L	YOR341W	2807.43	126.128	50144.1	127.131	10319.5	54294.6	6556.61	0.12076	8.2809
0.9863	JL033021_040221_RPA2HFH_Q2_10to1_50B.13116.13116.3	0.435	K.LSVSVEQVSIAK[425.27]PM[147.04]SNDGVSSAVER.K	YPR010C	2901.48	126.127	24759.2	127.13	6245.69	26799.1	4470.07	0.166799	5.99523
1	JL033021_040221_RPA2HFH_Q2_10to1_50B.13218.13218.3	0.000243	R.EAAAEVTNLDK[425.27]DTPADDPELLK.R	YOR341W	2651.33	126.126	29184.7	127.13	6286.16	31598.1	4116.14	0.130266	7.67662
1	JL033021_040221_RPA2HFH_Q2_10to1_50B.13231.13231.3	5.61e-05	R.EAAAEVTNLDK[425.27]DTPADDPELLK.R	YOR341W	2651.33	126.127	31520.6	127.13	6929.78	34126	4596.13	0.134681	7.42495
1	JL033021_040221_RPA2HFH_Q2_10to1_50B.13276.13276.4	0.00104	K.TLPSFKPYETDAM[147.04]AGGYVK[425.27]GR.F	YOR341W	2600.3	126.128	56924.4	127.131	11627.4	61637	7349.48	0.119238	8.38658
0.9999	JL033021_040221_RPA2HFH_Q2_10to1_50B.13292.13292.3	0.0177	K.TLPSFKPYETDAM[147.04]AGGYVK[425.27]GR.F	YOR341W	2600.3	126.127	69596	127.13	13297.1	75365.2	8001.05	0.106164	9.4194
0.9728	JL033021_040221_RPA2HFH_Q2_10to1_50B.13307.13307.3	0.0032	K.TLPSFK[425.27]PYETDAM[147.04]AGGYVK.G	YOR341W	2387.18	126.127	31881.6	127.13	6464.29	34521.3	4064.91	0.117751	8.49251
1	JL033021_040221_RPA2HFH_Q2_10to1_50B.13375.13375.4	1.15e-10	R.IPTHPETEQPK[425.27]GFGYVQFSNM[147.04]EDAK.K	YGR159C	3162.5	126.127	34756.2	127.131	6714.48	37636.7	4074.96	0.108271	9.23608
0.9996	JL033021_040221_RPA2HFH_Q2_10to1_50B.13385.13385.3	1.36e-13	R.LIGDAAK[425.27]NQAAM[147.04]NPANTVFDAK.R	YLL024C	2572.3	126.127	53459.1	127.13	9661.28	57895.1	5553.67	0.0959265	10.4247
0.9946	JL033021_040221_RPA2HFH_Q2_10to1_50B.13393.13393.4	0.402	K.K[425.27]EQQNQSAERESADTGK.V	YGR047C	2202.06	126.127	18000.7	127.13	3822.75	19489.7	2480.42	0.127269	7.8574
0.9525	JL033021_040221_RPA2HFH_Q2_10to1_50B.13405.13405.3	0.0188	-.M[147.04]QIFVK[425.27]TLTGK.T	YIL148W,YKR094C,YLL039C,YLR167W	1577.89	126.127	42061.7	127.13	8164.41	45547.3	4972.84	0.10918	9.15921
1	JL033021_040221_RPA2HFH_Q2_10to1_50B.13419.13419.3	3.66e-08	R.EAAAEVTNLDKDTPADDPELLK[425.27]R.L	YOR341W	2807.43	126.127	56309.7	127.13	10961.3	60975.8	6690.79	0.109729	9.11339
1	JL033021_040221_RPA2HFH_Q2_10to1_50B.13421.13421.6	4.19e-05	R.K[425.27]ALANQLLTPSSNVSTHTLNK[425.27]K[425.27]VYR.H	YOR341W	3674.08	126.128	191533	127.131	37952.1	207399	23474.3	0.113185	8.83512
0.9835	JL033021_040221_RPA2HFH_Q2_10to1_50B.13428.13428.3	3.05e-11	R.EAAAEVTNLDKDTPADDPELLK[425.27]R.L	YOR341W	2807.43	126.127	76747.4	127.13	14563.9	83110.2	8716.55	0.104879	9.53476
1	JL033021_040221_RPA2HFH_Q2_10to1_50B.13436.13436.5	2.49e-05	R.K[425.27]ALANQLLTPSSNVSTHTLNK[425.27]K[425.27]VYR.H	YOR341W	3674.08	126.127	101224	127.131	22085.6	109592	14579.4	0.133034	7.5169
1	JL033021_040221_RPA2HFH_Q2_10to1_50B.13447.13447.4	7.32e-10	R.FYSGIK[425.27]PQEYYFHC[160.03]M[147.04]AGR.E	YOR341W	2566.19	126.127	70871.8	127.13	12510	76755.1	7043.09	0.0917606	10.8979
1	JL033021_040221_RPA2HFH_Q2_10to1_50B.13448.13448.5	2.17e-08	R.EAAAEVTNLDKDTPADDPELLK[425.27]R.L	YOR341W	2807.43	126.127	55421.1	127.131	11186.7	60010.3	7012.14	0.116849	8.55805
1	JL033021_040221_RPA2HFH_Q2_10to1_50B.13473.13473.3	9.89e-09	R.FYSGIK[425.27]PQEYYFHC[160.03]M[147.04]AGR.E	YOR341W	2566.19	126.127	82881.1	127.13	14848	89759.6	8470.4	0.0943676	10.5969
0.999	JL033021_040221_RPA2HFH_Q2_10to1_50B.13519.13519.3	0.06	R.GLSGEYK[425.27]FLR.Y	YAR010C,YBR012W-A,YBR012W-B,YDR098C-A,YDR098C-B,YDR170W-A,YDR210C-C,YDR210C-D,YDR261C-C,YDR261C-D,YDR316W-A,YDR316W-B,YDR365W-A,YDR365W-B,YER137C-A,YER138C,YER159C-A,YER160C,YGR027W-A,YGR027W-B,YGR038C-A,YGR038C-B,YGR161C-C,YGR161C-D,YHR214C-B,YHR214C-C,YJR026W,YJR027W,YJR028W,YJR029W,YLR157C-A,YLR157C-B,YLR227W-A,YLR227W-B,YLR256W-A,YML039W,YML040W,YML045W,YML045W-A,YMR045C,YMR046C,YMR050C,YMR05…	1465.8	126.127	100741	127.131	19985.5	109086	12372.3	0.113419	8.8169
1	JL033021_040221_RPA2HFH_Q2_10to1_50B.13522.13522.3	6.87e-06	R.DNNK[425.27]SGILDAVTSSK.V	YOR341W	1844.96	126.127	36619.1	127.13	5955.92	39663.2	3094.86	0.0780284	12.8158
1	JL033021_040221_RPA2HFH_Q2_10to1_50B.13533.13533.3	0.00815	R.VK[425.27]VIPYSTFR.L	RPB1-msCTD,YDL140C	1505.87	126.127	22358	127.13	5267.79	24203.2	3637.73	0.1503	6.65338
1	JL033021_040221_RPA2HFH_Q2_10to1_50B.13541.13541.3	0.000493	R.SLGHWVDSNGEPIDGK[425.27]LR.F	YOR340C	2276.16	126.127	61937.1	127.13	9143.21	67093.5	4237.43	0.063157	15.8336
1	JL033021_040221_RPA2HFH_Q2_10to1_50B.13550.13550.4	8.82e-11	R.SLGHWVDSNGEPIDGK[425.27]LR.F	YOR340C	2276.16	126.127	79475.8	127.13	13440.7	86078.2	7268.04	0.0844353	11.8434
1	JL033021_040221_RPA2HFH_Q2_10to1_50B.13575.13575.3	0.000715	R.SLGHWVDSNGEPIDGK[425.27]LR.F	YOR340C	2276.16	126.127	59001.8	127.13	10774.9	63896.9	6249.44	0.0978051	10.2244
0.9911	JL033021_040221_RPA2HFH_Q2_10to1_50B.13577.13577.3	0.201	R.NFNDPEVQADM[147.04]K[425.27]HFPFK.L	YAL005C	2376.13	126.127	46757.2	127.13	7785.34	50642.6	4145.1	0.0818502	12.2174
0.9574	JL033021_040221_RPA2HFH_Q2_10to1_50B.13589.13589.3	2.46	R.LVNHFIQEFK[425.27]R.K	YAL005C,YLL024C	1726.96	126.127	82438.5	127.13	14761.1	89280.4	8416.94	0.0942754	10.6072
1	JL033021_040221_RPA2HFH_Q2_10to1_50B.13599.13599.4	2.57e-14	R.VFGALK[425.27]GASDGGLYVPHSENR.F	YPL131W	2470.27	126.127	97754.7	127.13	18814.9	105857	11386	0.10756	9.29712
0.9997	JL033021_040221_RPA2HFH_Q2_10to1_50B.13600.13600.4	0.004	R.LVNHFIQEFK[425.27]R.K	YAL005C,YLL024C	1726.96	126.127	189157	127.13	35286.3	204845	20831	0.101692	9.83366
0.9811	JL033021_040221_RPA2HFH_Q2_10to1_50B.13611.13611.3	0.0318	R.GK[425.27]LLLK[425.27]IK.W	YPR010C	1506.01	126.127	100122	127.13	20596.7	108410	13082.8	0.120679	8.28643
1	JL033021_040221_RPA2HFH_Q2_10to1_50B.13631.13631.3	3.67e-07	R.ITM[147.04]AALNPEAIDEENK[425.27]PSTLR.L	YML074C	2625.34	126.127	71504.1	127.13	13519.4	77432.5	8068.04	0.104195	9.59743
0.9999	JL033021_040221_RPA2HFH_Q2_10to1_50B.13687.13687.3	0.0129	K.KLELFPYQNNSK[425.27]YVAK.K	YNL248C	2238.21	126.127	62831.8	127.13	13165.7	68030.6	8467.51	0.124466	8.03431
0.9654	JL033021_040221_RPA2HFH_Q2_10to1_50B.13707.13707.4	0.0979	R.KALANQLLTPSSNVSTHTLNK[407.26]KVYR.H	YOR341W	3061.71	126.127	45485.1	127.131	8015.72	49261.1	4506.18	0.0914753	10.9319
1	JL033021_040221_RPA2HFH_Q2_10to1_50B.13721.13721.4	1.43e-05	R.KALANQLLTPSSNVSTHTLNK[407.26]KVYR.H	YOR341W	3061.71	126.127	60892.3	127.13	8560.13	65965.2	3706.41	0.0561873	17.7976
1	JL033021_040221_RPA2HFH_Q2_10to1_50B.13738.13738.3	2.29e-07	K.DM[147.04]LDENTK[425.27]YFIQPSGR.F	YDR502C,YLR180W	2226.07	126.127	48920.9	127.13	10548.8	52966.3	6912.18	0.130502	7.66274
0.9778	JL033021_040221_RPA2HFH_Q2_10to1_50B.13742.13742.5	3.47e-05	R.KALANQLLTPSSNVSTHTLNKK[407.26]VYR.H	YOR341W	3061.71	126.127	58107.2	127.131	10842	62926.1	6401.68	0.101733	9.82963
1	JL033021_040221_RPA2HFH_Q2_10to1_50B.13751.13751.3	0.00169	R.LIFAGK[425.27]QLEDGR.T	YIL148W,YKR094C,YLL039C,YLR167W	1642.91	126.127	43770.7	127.131	8239.23	47400.1	4899.59	0.103367	9.6743
1	JL033021_040221_RPA2HFH_Q2_10to1_50B.13815.13815.4	0.00797	R.LVSK[425.27]YRPNC[160.03]PIILVTR.C	YAL038W	2225.28	126.127	25512.3	127.13	5143.31	27624.9	3221.17	0.116604	8.57606
0.9813	JL033021_040221_RPA2HFH_Q2_10to1_50B.13821.13821.4	0.753	K.GGISAVTGM[147.04]AEPEYGK[425.27]DYIHSVADR.V	YDR346C	2935.41	126.127	33194.1	127.131	6518.25	35944.3	4004.91	0.11142	8.97505
1	JL033021_040221_RPA2HFH_Q2_10to1_50B.13842.13842.3	0.000442	R.FTVIK[425.27]PGQFGR.S	YNL248C	1545.87	126.127	84528.8	127.13	14913	91546	8392.06	0.0916704	10.9086
0.9997	JL033021_040221_RPA2HFH_Q2_10to1_50B.13868.13868.3	0.15	R.SSK[425.27]IAGLLHNTIK.F	YLR106C	1677.99	126.126	25820.7	127.13	4217.94	27967	2201.88	0.0787314	12.7014
1	JL033021_040221_RPA2HFH_Q2_10to1_50B.13899.13899.5	1.29e-08	R.FRLPSK[425.27]LGEEVHENSQNQLLSK.V	YOR341W	2849.51	126.127	28928.8	127.13	5291.71	31328.8	3073.47	0.0981036	10.1933
1	JL033021_040221_RPA2HFH_Q2_10to1_50B.13909.13909.3	0.0447	R.LIFAGK[425.27]QLEDGR.T	YIL148W,YKR094C,YLL039C,YLR167W	1642.91	126.127	42760.1	127.131	7931.46	46306.6	4660.52	0.100645	9.93593
0.9978	JL033021_040221_RPA2HFH_Q2_10to1_50B.13985.13985.4	0.249	R.SIAVHPTK[425.27]PYVLSGSDDLTVK.L	YGL137W	2523.37	126.127	40284.1	127.131	8321.28	43618.3	5300.51	0.12152	8.22908
1	JL033021_040221_RPA2HFH_Q2_10to1_50B.14042.14042.3	7.43e-05	E.K[407.26]VIFDGK[407.26]PLNSEDEISNSGYLGNK.L	YPR010C	3181.65	126.127	12222.5	127.131	3338.45	13227.4	2480.17	0.187503	5.33325
1	JL033021_040221_RPA2HFH_Q2_10to1_50B.14051.14051.4	1.65e-05	R.FRLPSK[425.27]LGEEVHENSQNQLLSK.V	YOR341W	2849.51	126.127	56557.7	127.131	11254.4	61242.4	6982.69	0.114017	8.7706
1	JL033021_040221_RPA2HFH_Q2_10to1_50B.14059.14059.4	0.00195	R.EAAAEVTNLDK[425.27]DTPADDPELLK[425.27]R.L	YOR341W	3104.6	126.127	39468.8	127.13	7344.68	42742.2	4327.2	0.101239	9.87757
1	JL033021_040221_RPA2HFH_Q2_10to1_50B.14064.14064.5	7.37e-09	R.FRLPSK[425.27]LGEEVHENSQNQLLSK.V	YOR341W	2849.51	126.127	33011.8	127.13	6096.28	35750	3569.11	0.0998351	10.0165
1	JL033021_040221_RPA2HFH_Q2_10to1_50B.14066.14066.3	0.00118	E.K[407.26]VIFDGK[407.26]PLNSEDEISNSGYLGNK.L	YPR010C	3181.65	126.127	13128.8	127.13	2606.9	14216.3	1614.9	0.113595	8.80322
1	JL033021_040221_RPA2HFH_Q2_10to1_50B.14090.14090.4	0.00327	R.FRLPSK[425.27]LGEEVHENSQNQLLSK.V	YOR341W	2849.51	126.127	52417.5	127.13	11304.1	56752	7407.56	0.130525	7.66136
1	JL033021_040221_RPA2HFH_Q2_10to1_50B.14124.14124.4	2.18e-07	R.LVK[425.27]ALEDIM[147.04]VHYDNTTR.N	RPB1-msCTD,YDL140C	2330.2	126.127	27360.9	127.131	12149	29571.9	10562.4	0.357177	2.79973
0.9863	JL033021_040221_RPA2HFH_Q2_10to1_50B.14147.14147.3	3.47e-05	K.KLELFPYQNNSK[407.26]YVAKK.L	YNL248C	2348.3	126.127	127246	127.13	23597.5	137799	13863.5	0.100606	9.93974
0.9663	JL033021_040221_RPA2HFH_Q2_10to1_50B.14155.14155.5	0.00664	R.RVPVM[147.04]VSGK[425.27]TLPSFKPYETDAM[147.04]AGGYVK[425.27]GR.F	YOR341W	3867.02	126.127	60049.6	127.13	10764.2	65033.2	6143.92	0.0944736	10.585
1	JL033021_040221_RPA2HFH_Q2_10to1_50B.14158.14158.4	8.16e-09	R.LVK[425.27]ALEDIM[147.04]VHYDNTTR.N	RPB1-msCTD,YDL140C	2330.2	126.127	26870.2	127.13	12052.1	29040.6	10502.6	0.361653	2.76508
1	JL033021_040221_RPA2HFH_Q2_10to1_50B.14164.14164.4	9.98e-07	K.SQYGASK[425.27]YGIVHSLHEVYGPEVAAK.V	YOR341W	2986.53	126.127	41557.6	127.13	7734.43	45004.2	4557.33	0.101264	9.87514
0.9995	JL033021_040221_RPA2HFH_Q2_10to1_50B.14166.14166.3	0.0206	K.VIFDGK[425.27]PLNSEDEISNSGYLGNK.L	YPR010C	2792.39	126.126	27351	127.13	5314.49	29617.5	3239.53	0.109379	9.14252
1	JL033021_040221_RPA2HFH_Q2_10to1_50B.14177.14177.5	2.64e-08	K.SQYGASK[425.27]YGIVHSLHEVYGPEVAAK.V	YOR341W	2986.53	126.127	34600.5	127.131	5309.41	37479.4	2583.28	0.0689254	14.5084
1	JL033021_040221_RPA2HFH_Q2_10to1_50B.14197.14197.3	0.000888	R.LVK[425.27]ALEDIM[147.04]VHYDNTTR.N	RPB1-msCTD,YDL140C	2330.2	126.127	39366.2	127.13	14380	42572.9	11875.4	0.278943	3.58497
1	JL033021_040221_RPA2HFH_Q2_10to1_50B.14202.14202.3	3.51e-08	R.QATK[425.27]DAGAISGLNVLR.L	YDL229W,YNL209W	1910.07	126.127	65557.9	127.131	12186	70995.1	7173.01	0.101035	9.89754
0.9802	JL033021_040221_RPA2HFH_Q2_10to1_50B.14222.14222.3	3.98e-07	K.FK[425.27]KDFEVNISSLDAR.E	YPR110C	2065.09	126.127	46177.7	127.13	9792.96	49997.5	6348.46	0.126975	7.87554
0.9971	JL033021_040221_RPA2HFH_Q2_10to1_50B.14244.14244.3	2.83e-10	R.EAAAEVTNLDK[425.27]DTPADDPELLK.R	YOR341W	2651.33	126.127	51499.8	127.131	9991.48	55767.6	6083.4	0.109085	9.16717
1	JL033021_040221_RPA2HFH_Q2_10to1_50B.14246.14246.4	1.41e-09	R.LVK[425.27]ALEDIM[147.04]VHYDNTTR.N	RPB1-msCTD,YDL140C	2330.2	126.127	22850.1	127.13	6115.2	24729.9	4501.62	0.182032	5.49354
0.9978	JL033021_040221_RPA2HFH_Q2_10to1_50B.14253.14253.3	1.41e-11	R.EAAAEVTNLDK[425.27]DTPADDPELLK.R	YOR341W	2651.33	126.127	51531	127.131	9096.22	55808.8	5121.26	0.0917643	10.8975
1	JL033021_040221_RPA2HFH_Q2_10to1_50B.14266.14266.3	4.8e-05	K.SK[425.27]LGANAILGVSM[147.04]AAAR.A	YHR174W	1942.08	126.127	39405.4	127.13	9221.56	42658	6344.12	0.14872	6.72402
0.9934	JL033021_040221_RPA2HFH_Q2_10to1_50B.14285.14285.3	0.0013	Q.RC[160.03]LTK[425.27]QLEGVHVSYDNSIR.D	YOR341W	2571.33	126.126	31533	127.13	6475.46	34143.2	4108.18	0.120322	8.31103
1	JL033021_040221_RPA2HFH_Q2_10to1_50B.14298.14298.4	1.35e-09	R.EAAAEVTNLDK[425.27]DTPADDPELLK[425.27]R.L	YOR341W	3104.6	126.127	104889	127.13	23267.6	113557	15516.9	0.136644	7.31829
1	JL033021_040221_RPA2HFH_Q2_10to1_50B.14303.14303.3	0.00168	R.AYSGLYQLGQTVK[425.27]QR.Y	YCL034W	2008.08	126.127	54198.2	127.13	10275.1	58691.6	6145.06	0.104701	9.55103
0.9995	JL033021_040221_RPA2HFH_Q2_10to1_50B.14309.14309.3	0.021	R.EAAAEVTNLDK[425.27]DTPADDPELLK[425.27]R.L	YOR341W	3104.6	126.126	48498.2	127.13	10661.8	52507	7071.2	0.134672	7.42547
1	JL033021_040221_RPA2HFH_Q2_10to1_50B.14333.14333.3	1.55e-12	K.LSVSVEQVSIAK[425.27]PM[147.04]SNDGVSSAVER.K	YPR010C	2901.48	126.126	59364.5	127.129	12150.9	64278.9	7691.31	0.119655	8.35733
0.9862	JL033021_040221_RPA2HFH_Q2_10to1_50B.14349.14349.3	0.286	T.SVNFYQK[425.27]ALENAK.T	YOL145C	1807.95	126.128	42532.8	127.131	6991.75	46067.9	3673.94	0.0797506	12.5391
0.996	JL033021_040221_RPA2HFH_Q2_10to1_50B.14354.14354.3	9.97e-11	R.DAK[425.27]LDKSQVDEIVLVGGSTR.L	YAL005C,YLL024C	2426.31	126.126	52229.3	127.13	9375.38	56563.8	5357.72	0.0947199	10.5574
1	JL033021_040221_RPA2HFH_Q2_10to1_50B.14384.14384.4	4.22e-12	K.LSVSVEQVSIAK[425.27]PM[147.04]SNDGVSSAVER.K	YPR010C	2901.48	126.127	50741.2	127.131	9732.62	54947	5874.12	0.106905	9.35409
1	JL033021_040221_RPA2HFH_Q2_10to1_50B.14416.14416.3	0.000491	R.LAK[425.27]LNQLLR.L	YGR254W,YHR174W	1364.86	126.127	110082	127.13	18906.7	119225	10377.6	0.0870426	11.4886
1	JL033021_040221_RPA2HFH_Q2_10to1_50B.14439.14439.3	0.00193	R.NLYIIAVK[425.27]GSGSR.L	YBL087C,YER117W	1673.95	126.127	48394.9	127.13	10256.1	52398.3	6645.71	0.126831	7.88453
1	JL033021_040221_RPA2HFH_Q2_10to1_50B.14492.14492.3	3.4e-07	K.LSVSVEQVSIAK[425.27]PM[147.04]SNDGVSSAVER.K	YPR010C	2901.48	126.127	31730.7	127.13	5168.34	34368.4	2689.74	0.0782619	12.7776
1	JL033021_040221_RPA2HFH_Q2_10to1_50B.14515.14515.3	0.000408	K.LSVSVEQVSIAK[425.27]PM[147.04]SNDGVSSAVER.K	YPR010C	2901.48	126.127	32231.8	127.13	5475.73	34909.2	2974.15	0.0851967	11.7375
0.9992	JL033021_040221_RPA2HFH_Q2_10to1_50B.14516.14516.3	0.0303	K.THIVLSHVLK[425.27]GLTDR.R	YML069W	1985.15	126.127	48548.4	127.13	9531.2	52570.7	5855.14	0.111377	8.97855
1	JL033021_040221_RPA2HFH_Q2_10to1_50B.14534.14534.3	5.6e-07	K.TLPSFK[425.27]PYETDAM[147.04]AGGYVK.G	YOR341W	2387.18	126.127	64342.1	127.13	13065.6	69669.4	8224.66	0.118053	8.4708
1	JL033021_040221_RPA2HFH_Q2_10to1_50B.14555.14555.3	0.00566	R.VVGVIVEPVSIK[425.27]R.S	YLR083C	1691.04	126.127	53260.5	127.13	9993.31	57677	5927.3	0.102767	9.73073
0.9979	JL033021_040221_RPA2HFH_Q2_10to1_50B.14578.14578.3	9.12e-09	R.QATK[425.27]DAGTIAGLNVLR.L	YAL005C,YER103W,YJL034W,YLL024C	1924.08	126.127	69595.5	127.13	10435.1	75388.2	4934.28	0.0654517	15.2785
1	JL033021_040221_RPA2HFH_Q2_10to1_50B.14582.14582.5	2e-05	R.K[425.27]EQC[160.03]VLQYVFHSRPNLSR.K	YOR341W	2557.33	126.127	39054.8	127.13	5313.02	42310	2187.28	0.0516965	19.3437
0.9835	JL033021_040221_RPA2HFH_Q2_10to1_50B.14621.14621.5	3.04e-07	R.K[425.27]ALANQLLTPSSNVSTHTLNK[407.26]KVYR.H	YOR341W	3358.89	126.127	136101	127.13	24393	147396	13920.9	0.0944457	10.5881
1	JL033021_040221_RPA2HFH_Q2_10to1_50B.14623.14623.3	0.000368	R.SADEGATVFYTC[160.03]TSC[160.03]GYK[425.27]FR.T	YJR063W	2616.17	126.126	47188.8	127.13	7944.47	51109.3	4276.87	0.0836809	11.9502
1	JL033021_040221_RPA2HFH_Q2_10to1_50B.14627.14627.3	3.24e-05	R.M[147.04]DTM[147.04]ANILYYPQK[425.27]PLGTTR.A	YOR151C	2541.27	126.127	54724.8	127.13	11612.6	59251.7	7531.03	0.127102	7.86767
1	JL033021_040221_RPA2HFH_Q2_10to1_50B.14647.14647.3	1.19e-06	R.SADEGATVFYTC[160.03]TSC[160.03]GYK[425.27]FR.T	YJR063W	2616.17	126.127	66102.9	127.13	11081.7	71595.2	5940.66	0.0829756	12.0517
1	JL033021_040221_RPA2HFH_Q2_10to1_50B.14648.14648.4	5.19e-08	R.K[425.27]EQC[160.03]VLQYVFHSRPNLSR.K	YOR341W	2557.33	126.127	30352.9	127.13	4799.84	32877.2	2418.56	0.0735634	13.5937
1	JL033021_040221_RPA2HFH_Q2_10to1_50B.14666.14666.3	0.000666	R.EAAAEYAQLLAK[425.27]R.L	YBR181C,YPL090C	1729.94	126.126	43635.3	127.13	7688.7	47257.7	4321.8	0.0914518	10.9347
0.9999	JL033021_040221_RPA2HFH_Q2_10to1_50B.14669.14669.3	0.00196	L.NNLK[425.27]QENAYLLIR.R	YOR224C	1885.05	126.128	27691.1	127.131	5233.95	29987	3122.7	0.104135	9.6029
1	JL033021_040221_RPA2HFH_Q2_10to1_50B.14678.14678.3	2.37e-06	R.LGEHNIDVLEGNEQFINAAK[407.26]IITH.P	TRYP_PIG	2953.54	126.127	16070.7	127.131	3202.65	17401.8	1989.19	0.11431	8.74816
1	JL033021_040221_RPA2HFH_Q2_10to1_50B.14715.14715.4	9.01e-09	R.K[425.27]EQC[160.03]VLQYVFHSR.P	YOR341W	1990.02	126.127	49635.1	127.13	8869.24	53754.7	5048.23	0.0939123	10.6482
1	JL033021_040221_RPA2HFH_Q2_10to1_50B.14717.14717.3	7.2e-08	R.K[425.27]EQC[160.03]VLQYVFHSR.P	YOR341W	1990.02	126.127	33135.5	127.13	5189.53	35891.6	2586.34	0.0720598	13.8774
1	JL033021_040221_RPA2HFH_Q2_10to1_50B.14735.14735.3	8.75e-07	R.LGEHNIDVLEGNEQFINAAK[425.27]IITHP.N	TRYP_PIG	3068.6	126.127	13650.9	127.131	2514.15	14783.3	1468.63	0.0993441	10.066
1	JL033021_040221_RPA2HFH_Q2_10to1_50B.14743.14743.3	8.76e-06	R.LGEHNIDVLEGNEQFINAAK[425.27]IIT.H	TRYP_PIG	2834.49	126.127	16480.9	127.131	2821.98	17849.7	1544.45	0.0865249	11.5574
1	JL033021_040221_RPA2HFH_Q2_10to1_50B.14749.14749.3	1.83e-11	K.YNNK[425.27]VGGVVLGYEGLK.L	YOR340C	2006.09	126.127	37806.7	127.13	5687.52	40953.3	2700.63	0.0659443	15.1643
1	JL033021_040221_RPA2HFH_Q2_10to1_50B.14755.14755.3	3.07e-05	R.STLDPVEK[425.27]VLR.D	YAL005C,YLL024C	1552.89	126.127	267870	127.13	46099.2	290117	25351.6	0.087384	11.4437
1	JL033021_040221_RPA2HFH_Q2_10to1_50B.14757.14757.3	1.31e-07	R.LGEHNIDVLEGNEQFINAAK[407.26]IITH.P	TRYP_PIG	2953.54	126.127	17270.1	127.131	2672.73	18706.9	1313.66	0.0702234	14.2403
1	JL033021_040221_RPA2HFH_Q2_10to1_50B.14801.14801.3	1.3e-05	R.LGEHNIDVLEGNEQFINAAK[425.27].L	TRYP_PIG	2507.27	126.127	22659.7	127.131	3965.77	24541.1	2215.42	0.0902741	11.0774
1	JL033021_040221_RPA2HFH_Q2_10to1_50B.14806.14806.3	0.012	R.DLNDDLSK[407.26]LQKDK.V	YOR341W	1809.96	126.127	80485.3	127.13	13849.4	87169.7	7615.37	0.0873626	11.4466
0.9925	JL033021_040221_RPA2HFH_Q2_10to1_50B.14835.14835.3	2.38e-09	R.ALAYM[147.04]GLEPNTPLK[425.27]SIK.V	YGL009C	2158.18	126.127	46156.1	127.13	9463.27	49976.9	5997.1	0.119997	8.33351
1	JL033021_040221_RPA2HFH_Q2_10to1_50B.14848.14848.3	0.00106	R.ITM[147.04]AAIDPEPFDDDKK[407.26]PSTLR.L	YLR449W	2654.33	126.127	50081.4	127.13	9017.56	54237.5	5167.11	0.0952682	10.4967
1	JL033021_040221_RPA2HFH_Q2_10to1_50B.14850.14850.3	8.67e-08	K.K[425.27]DFEVNISSLDAR.E	YPR110C	1789.93	126.127	82980.9	127.131	15787.9	89860.1	9468.55	0.10537	9.49038
0.9869	JL033021_040221_RPA2HFH_Q2_10to1_50B.14904.14904.3	0.000787	R.LGEHNIDVLEGNEQFINAAK[425.27]I.L	TRYP_PIG	2620.36	126.127	30931.8	127.131	6050.43	33494.7	3706.7	0.110665	9.03625
1	JL033021_040221_RPA2HFH_Q2_10to1_50B.14988.14988.3	0.000129	R.LGEHNIDVLEGNEQFINAAK[425.27].L	TRYP_PIG	2507.27	126.127	30271.2	127.13	4665.19	32789.8	2281.6	0.0695828	14.3714
1	JL033021_040221_RPA2HFH_Q2_10to1_50B.15184.15184.3	3.98e-15	K.VIFDGK[425.27]PLNSEDEISNSGYLGNK.L	YPR010C	2792.39	126.128	157715	127.131	33908.9	170758	22177.6	0.129877	7.69958
0.9995	JL033021_040221_RPA2HFH_Q2_10to1_50B.15210.15210.4	0.0441	K.ELAEK[425.27]K[425.27]IPLVIR.R	YPR187W	2002.24	126.127	76303	127.13	18922.9	82592.4	13427.5	0.162575	6.15099
1	JL033021_040221_RPA2HFH_Q2_10to1_50B.15263.15263.3	2.78e-09	F.VLK[425.27]YLDSELSAM[147.04]GIR.L	YPR010C	2007.08	126.127	49020.8	127.13	11774.7	53064.5	8216.79	0.154845	6.45805
1	JL033021_040221_RPA2HFH_Q2_10to1_50B.15300.15300.3	3.3e-07	K.VIFDGK[425.27]PLNSEDEISNSGYLGNK.L	YPR010C	2792.39	126.127	37059.1	127.13	8374.19	40120.5	5646.73	0.140744	7.10508
0.9978	JL033021_040221_RPA2HFH_Q2_10to1_50B.15322.15322.3	0.561	K.YSAVLM[147.04]EFTTPK[425.27]SYANTK.L	YDR346C	2363.18	126.127	43404.7	127.13	7512.55	47009.1	4153.75	0.0883605	11.3173
1	JL033021_040221_RPA2HFH_Q2_10to1_50B.15338.15338.3	0.00356	K.VIFDGK[425.27]PLNSEDEISNSGYLGNK.L	YPR010C	2792.39	126.127	24464.5	127.13	6089.71	26480.8	4329.37	0.163491	6.11656
0.9989	JL033021_040221_RPA2HFH_Q2_10to1_50B.15367.15367.3	0.0394	K.VIFDGK[425.27]PLNSEDEISNSGYLGNK.L	YPR010C	2792.39	126.126	29464.3	127.13	6134.23	31902.6	3928.24	0.123132	8.12136
1	JL033021_040221_RPA2HFH_Q2_10to1_50B.15429.15429.4	8.63e-09	K.TK[425.27]EVM[147.04]DFVNTPLTDK[425.27]TTDEVVR.H	YGL244W	3147.62	126.126	41189.1	127.129	6656.99	44613.4	3435.85	0.0770137	12.9847
1	JL033021_040221_RPA2HFH_Q2_10to1_50B.15445.15445.4	8.43e-12	K.TK[425.27]EVM[147.04]DFVNTPLTDK[425.27]TTDEVVR.H	YGL244W	3147.62	126.127	46207.8	127.131	7763.37	50047	4170.88	0.0833393	11.9991
1	JL033021_040221_RPA2HFH_Q2_10to1_50B.15497.15497.3	0.196	R.K[425.27]ELYGNIVM[147.04]SGGTTM[147.04]FPGIAER.M	YFL039C	2699.34	126.127	28989.6	127.13	5735.06	31391	3543.11	0.11287	8.85974
1	JL033021_040221_RPA2HFH_Q2_10to1_50B.15512.15512.3	0.000667	K.VFSVSETAK[425.27]IPAIDYSK.V	YJL148W	2151.15	126.127	40612.5	127.131	7082.89	43984.7	3943.99	0.0896673	11.1523
1	JL033021_040221_RPA2HFH_Q2_10to1_50B.15533.15533.4	0.00686	R.VFNYNTGEK[425.27]VVDFEAHPDYIR.S	YGL137W	2809.38	126.127	44080.4	127.131	9212.17	47727.9	5914.37	0.123919	8.06982
0.9949	JL033021_040221_RPA2HFH_Q2_10to1_50B.15571.15571.3	3.9e-10	R.VTNTTSTDFPGFSK[425.27]DAENEWNVEK.F	YPR110C	3012.41	126.126	30002.6	127.13	5582.38	32490.9	3288.56	0.101215	9.88
0.9964	JL033021_040221_RPA2HFH_Q2_10to1_50B.15585.15585.3	2.75e-13	R.VTNTTSTDFPGFSK[425.27]DAENEWNVEK.F	YPR110C	3012.41	126.127	42925.4	127.13	7263.96	46491.4	3930.4	0.0845404	11.8287
1	JL033021_040221_RPA2HFH_Q2_10to1_50B.15642.15642.4	4.78e-06	K.RSEYVDM[147.04]AIAK[425.27]ALSDGR.T	YOR341W	2194.11	126.127	30899.8	127.13	4183.01	33475.4	1708.47	0.0510367	19.5938
0.9999	JL033021_040221_RPA2HFH_Q2_10to1_50B.15672.15672.4	0.0142	K.FK[425.27]K[425.27]DFEVNISSLDAR.E	YPR110C	2362.27	126.127	21680.9	127.13	3989.88	23479.4	2329.13	0.0991988	10.0808
0.9999	JL033021_040221_RPA2HFH_Q2_10to1_50B.15700.15700.4	0.0168	R.RTSIIGTIGPK[425.27]TNNPETLVALR.K	YAL038W	2647.51	126.127	28320.6	127.13	6135.94	30662.3	4032.74	0.131521	7.60334
0.9976	JL033021_040221_RPA2HFH_Q2_10to1_50B.15738.15738.3	0.0245	R.GEVIK[425.27]GWDIGVAGM[147.04]SVGGER.R	YML074C	2329.18	126.127	29842.1	127.13	6348.82	32310.5	4124.27	0.127645	7.83424
1	JL033021_040221_RPA2HFH_Q2_10to1_50B.15761.15761.3	0.00839	R.NLNNLK[425.27]QENAYLLIR.R	YOR224C	2112.18	126.127	71941.9	127.131	14045.7	77903	8592.64	0.110299	9.06625
1	JL033021_040221_RPA2HFH_Q2_10to1_50B.15884.15884.3	1.19e-09	K.VEK[425.27]AVITVPAYFNDAQR.Q	YDL229W,YNL209W	2217.19	126.127	33407	127.13	5863.89	36180.5	3284.59	0.0907834	11.0152
1	JL033021_040221_RPA2HFH_Q2_10to1_50B.15918.15918.3	2.38e-08	K.LDK[425.27]SQVDEIVLVGGSTR.L	YAL005C,YLL024C	2112.15	126.127	43054.1	127.131	8211.66	46623.2	4934.38	0.105835	9.44864
1	JL033021_040221_RPA2HFH_Q2_10to1_50B.15979.15979.3	4.73e-07	R.GSFFAQLK[425.27]TTTVR.K	YPR010C	1751.97	126.127	121086	127.13	22395.3	131129	13128.2	0.100117	9.98836
1	JL033021_040221_RPA2HFH_Q2_10to1_50B.15981.15981.4	2.2e-07	R.HIAVGK[425.27]QIVNIPSFM[147.04]VR.L	YBR189W,YPL081W	2221.25	126.127	29498.7	127.13	5667.41	31943.7	3424.91	0.107217	9.32688
1	JL033021_040221_RPA2HFH_Q2_10to1_50B.15983.15983.3	2.01e-05	R.TLSDYNIQK[425.27]ESTLHLVLR.L	YIL148W,YKR094C,YLL039C,YLR167W	2426.32	126.127	73294.6	127.131	15880.4	79354.9	10437.3	0.131527	7.60299
1	JL033021_040221_RPA2HFH_Q2_10to1_50B.15992.15992.4	7.84e-06	R.TLSDYNIQK[425.27]ESTLHLVLR.L	YIL148W,YKR094C,YLL039C,YLR167W	2426.32	126.127	62815.5	127.131	13686.3	68008.7	9026.9	0.132732	7.534
1	JL033021_040221_RPA2HFH_Q2_10to1_50B.16035.16035.3	0.000724	K.IIGWVSHEQGK[425.27]IIADTLR.Y	YPR010C	2332.3	126.127	60796	127.13	10642	65843.7	5945.9	0.0903032	11.0738
1	JL033021_040221_RPA2HFH_Q2_10to1_50B.16079.16079.4	0.0205	R.DAK[425.27]LDK[425.27]SQVDEIVLVGGSTR.L	YAL005C,YLL024C	2723.49	126.127	37399.5	127.131	8878.48	40485.5	6156.56	0.152068	6.57599
1	JL033021_040221_RPA2HFH_Q2_10to1_50B.16088.16088.3	0.00406	R.C[160.03]LTK[407.26]QLEGVHVSYDNSIR.D	YOR341W	2397.22	126.127	83393.6	127.13	13431.1	90327.1	6906.09	0.0764565	13.0793
0.9802	JL033021_040221_RPA2HFH_Q2_10to1_50B.16096.16096.3	0.591	R.GSFFAQLK[407.26]TTTVR.K	YPR010C	1733.95	126.127	32268.9	127.13	5997.62	34945.2	3530.07	0.101017	9.8993
1	JL033021_040221_RPA2HFH_Q2_10to1_50B.16116.16116.3	0.0054	R.GSFFAQLK[407.26]TTTVR.K	YPR010C	1733.95	126.127	55218.1	127.13	9416.44	59804.7	5133.4	0.0858361	11.6501
1	JL033021_040221_RPA2HFH_Q2_10to1_50B.16128.16128.3	1.58e-06	R.GSFFAQLK[425.27]TTTVR.K	YPR010C	1751.97	126.127	134526	127.131	27169.4	145666	17037.4	0.116963	8.54975
0.9996	JL033021_040221_RPA2HFH_Q2_10to1_50B.16130.16130.3	1.4e-09	R.IINEPTAAAIAYGLDK[425.27]K.G	YAL005C,YBL075C,YER103W,YLL024C	2084.16	126.127	100473	127.131	15761	108830	7869.43	0.0723095	13.8294
1	JL033021_040221_RPA2HFH_Q2_10to1_50B.16142.16142.3	5.76e-10	R.GFGYGTM[147.04]YKTEK[407.26]VDLALNR.N	YPR010C	2457.24	126.127	318806	127.13	60731.2	345234	36458.4	0.105605	9.46927
1	JL033021_040221_RPA2HFH_Q2_10to1_50B.16150.16150.3	4.26e-06	K.IITHPNFNGNTLDNDIM[147.04]LIK[425.27].L	TRYP_PIG	2595.34	126.128	24492.2	127.131	5316.6	26517.2	3498.44	0.131931	7.57974
1	JL033021_040221_RPA2HFH_Q2_10to1_50B.16156.16156.3	0.000204	K.IITHPNFNGNTLDNDIMLIK[425.27].L	TRYP_PIG	2579.35	126.128	19685.6	127.131	3558.07	21319.1	2045.53	0.0959482	10.4223
1	JL033021_040221_RPA2HFH_Q2_10to1_50B.16189.16189.3	4.01e-06	K.IITHPNFNGNTLDNDIM[147.04]LIK[425.27]LSSPA.T	TRYP_PIG	3050.58	126.127	12310.7	127.13	2843.5	13327.2	1941.88	0.145708	6.86304
1	JL033021_040221_RPA2HFH_Q2_10to1_50B.16195.16195.3	7.5e-09	R.NLNNLK[425.27]QENAYLLIR.R	YOR224C	2112.18	126.127	406708	127.13	80465.6	440399	49714.1	0.112884	8.85863
1	JL033021_040221_RPA2HFH_Q2_10to1_50B.16197.16197.3	1.98e-09	R.NLNNLK[425.27]QENAYLLIR.R	YOR224C	2112.18	126.127	443415	127.13	88349.2	480141	54866.8	0.114272	8.75103
1	JL033021_040221_RPA2HFH_Q2_10to1_50B.16218.16218.3	0.000126	R.IASK[425.27]NQLESIAYSLK.N	YAL005C,YLL024C	1961.09	126.127	36467.3	127.13	7598.23	39485	4868.36	0.123296	8.11054
1	JL033021_040221_RPA2HFH_Q2_10to1_50B.16233.16233.3	0.00159	R.QATK[407.26]DAGAISGLNVLR.L	YDL229W,YNL209W	1892.06	126.127	35284.6	127.13	7249.03	38205.3	4600.33	0.120411	8.30491
0.9794	JL033021_040221_RPA2HFH_Q2_10to1_50B.16245.16245.3	0.0418	N.YRNLNNLK[407.26]QENAYLLIR.R	YOR224C	2413.33	126.127	46208	127.131	9590.3	50032.1	6128.57	0.122493	8.16374
0.9874	JL033021_040221_RPA2HFH_Q2_10to1_50B.16251.16251.3	0.00287	K.IITHPNFNGNTLDNDIM[147.04]LIK[425.27]LSS.P	TRYP_PIG	2882.49	126.126	20008.1	127.13	3203.01	21671.7	1636.1	0.0754947	13.246
0.9998	JL033021_040221_RPA2HFH_Q2_10to1_50B.16295.16295.3	0.0819	K.IITHPNFNGNTLDNDIM[147.04]LIK[425.27].L	TRYP_PIG	2595.34	126.127	29673.8	127.13	5558.39	32134.6	3292.36	0.102456	9.76033
0.9991	JL033021_040221_RPA2HFH_Q2_10to1_50B.16313.16313.3	0.00781	R.TQVLQYLGDK[407.26]FR.V	YPR010C	1745.95	126.127	52489.2	127.13	10907.2	56833	6975.91	0.122744	8.14704
1	JL033021_040221_RPA2HFH_Q2_10to1_50B.16346.16346.3	1.36e-08	R.NLNNLK[425.27]QENAYLLIR.R	YOR224C	2112.18	126.127	53517.1	127.131	11713.8	57941.1	7747.88	0.13372	7.47832
1	JL033021_040221_RPA2HFH_Q2_10to1_50B.16371.16371.3	4.47e-05	K.AIFEILNK[425.27]SNYDTNR.K	YOR270C	2094.08	126.127	49603.6	127.13	9936.88	53711.7	6195.13	0.11534	8.66999
1	JL033021_040221_RPA2HFH_Q2_10to1_50B.16414.16414.4	1.64e-05	R.SAIEHTTLK[425.27]SVTIASEIYYDPDPR.S	RPB1-msCTD,YDL140C	3002.53	126.127	19324.2	127.13	5595.9	20910.4	4261.67	0.203806	4.90663
0.9509	JL033021_040221_RPA2HFH_Q2_10to1_50B.16415.16415.3	6.67e-10	K.DAK[407.26]ISKSQIDEVVLVGGSTR.L	YDL229W,YNL209W	2380.3	126.127	32271.9	127.131	5724.71	34950.8	3237.35	0.0926262	10.7961
0.97	JL033021_040221_RPA2HFH_Q2_10to1_50B.16534.16534.3	0.946	K.FLQNSNLGGIIPTVNGK[425.27]PVR.Q	YAR010C,YBR012W-A,YBR012W-B,YDR098C-A,YDR098C-B,YDR210C-C,YDR210C-D,YDR261C-C,YDR261C-D,YDR316W-A,YDR316W-B,YDR365W-A,YDR365W-B,YER137C-A,YER138C,YER159C-A,YER160C,YGR027W-A,YGR027W-B,YGR038C-A,YGR038C-B,YGR161C-C,YGR161C-D,YHR214C-B,YHR214C-C,YJR026W,YJR027W,YJR028W,YJR029W,YLR157C-A,YLR157C-B,YLR227W-A,YLR227W-B,YLR256W-A,YML039W,YML040W,YML045W,YML045W-A,YMR050C,YMR051C,YNL054W-A,YNL054W-B,YOL…	2420.36	126.126	39920.3	127.13	6456.07	43239.1	3334.45	0.0771166	12.9674
1	JL033021_040221_RPA2HFH_Q2_10to1_50B.16561.16561.3	0.000813	R.ISPK[425.27]ILDEFYDR.A	YBR127C	1791.95	126.127	34117.6	127.131	6799.74	36943.4	4223.64	0.114327	8.74681
0.9998	JL033021_040221_RPA2HFH_Q2_10to1_50B.16587.16587.3	0.00762	R.QATK[407.26]DAGTIAGLNVLR.L	YAL005C,YER103W,YJL034W,YLL024C	1906.07	126.127	41662.4	127.131	7492.28	45119.9	4288.43	0.0950454	10.5213
0.9992	JL033021_040221_RPA2HFH_Q2_10to1_50B.16599.16599.3	0.00364	R.QATK[407.26]DAGTIAGLNVLR.L	YAL005C,YER103W,YJL034W,YLL024C	1906.07	126.127	51787.4	127.13	8340.1	56093.1	4288	0.0764443	13.0814
1	JL033021_040221_RPA2HFH_Q2_10to1_50B.16614.16614.4	0.000714	R.SAIEHTTLK[425.27]SVTIASEIYYDPDPR.S	RPB1-msCTD,YDL140C	3002.53	126.127	19603.6	127.13	6609.67	21205	5322.93	0.251022	3.98372
0.9816	JL033021_040221_RPA2HFH_Q2_10to1_50B.16631.16631.3	5.65e-07	R.ALAYM[147.04]GLEPNTPLKSIK[407.26]VDK.V	YGL009C	2482.36	126.126	52744	127.13	9453.39	57121.3	5395.11	0.09445	10.5876
1	JL033021_040221_RPA2HFH_Q2_10to1_50B.16664.16664.3	9.69e-07	R.IVVGK[425.27]LNNVGTGSFDVLAK.V	YOR341W	2227.27	126.128	39760.5	127.131	7529.89	43056.9	4499.48	0.104501	9.56931
0.9927	JL033021_040221_RPA2HFH_Q2_10to1_50B.16671.16671.3	1.06e-10	R.GQKLASNIK[407.26]LAM[147.04]VVPGSGLVK.K	YGL009C	2404.4	126.127	31311.9	127.13	6374.07	33904.2	4019.39	0.118551	8.43517
1	JL033021_040221_RPA2HFH_Q2_10to1_50B.16779.16779.4	3.5e-08	R.QLHNK[425.27]GIYPPINVLPSLSR.L	YBR127C	2442.38	126.127	29843.6	127.13	4545.4	32327	2191.63	0.0677956	14.7502
0.9996	JL033021_040221_RPA2HFH_Q2_10to1_50B.16794.16794.3	2.11e-11	R.DAKLDK[407.26]SQVDEIVLVGGSTR.L	YAL005C,YLL024C	2408.3	126.127	29737.5	127.13	5823.21	32201.4	3570.42	0.110878	9.01894
1	JL033021_040221_RPA2HFH_Q2_10to1_50B.16834.16834.3	0.000755	R.DFK[425.27]GLPPAQDFSAAPIQVSTTEK.K	YDR156W	2743.41	126.127	22430	127.13	4619.7	24286.6	2936.78	0.120922	8.26982
1	JL033021_040221_RPA2HFH_Q2_10to1_50B.16864.16864.4	0.000275	K.YTQVLKPIAFPGGLLEDNVK[425.27]AHPR.L	YJL130C	2959.64	126.127	29315.9	127.13	6210.03	31741.1	4022.78	0.126737	7.89033
1	JL033021_040221_RPA2HFH_Q2_10to1_50B.16910.16910.3	6.85e-06	K.FKK[407.26]DFEVNISSLDAR.E	YPR110C	2047.08	126.127	66018.6	127.13	11368.3	71501.4	6255.35	0.0874857	11.4304
1	JL033021_040221_RPA2HFH_Q2_10to1_50B.16913.16913.3	1.41e-05	R.LETIYLEGNPIQLENK[425.27]TSYR.R	YKL193C	2677.4	126.127	40591.3	127.13	9376.9	43942.7	6404.11	0.145738	6.86164
1	JL033021_040221_RPA2HFH_Q2_10to1_50B.16924.16924.3	1.81e-05	R.EGLIDTAVK[425.27]TAETGYIQR.R	RPB1-msCTD,YDL140C	2261.2	126.127	47072.5	127.13	22480.5	50863.4	19863.8	0.390533	2.5606
0.9999	JL033021_040221_RPA2HFH_Q2_10to1_50B.16937.16937.3	0.0156	R.GSFFAQLK[407.26]TTTVR.K	YPR010C	1733.95	126.127	42915.6	127.13	7018.02	46482.8	3667.73	0.0789051	12.6734
0.9945	JL033021_040221_RPA2HFH_Q2_10to1_50B.16997.16997.3	2.23e-08	K.FKK[407.26]DFEVNISSLDAR.E	YPR110C	2047.08	126.127	55718.7	127.131	10922.7	60335.2	6702.56	0.111089	9.00182
1	JL033021_040221_RPA2HFH_Q2_10to1_50B.17021.17021.3	0.000108	R.SEYVDM[147.04]AIAK[425.27]ALSDGR.T	YOR341W	2038.01	126.127	80107.7	127.13	16721.9	86736.5	10727.4	0.123678	8.08549
1	JL033021_040221_RPA2HFH_Q2_10to1_50B.17097.17097.4	0.000154	Y.RLLPQINILQPIK[425.27]GESAR.R	YPR110C	2342.39	126.127	77625.4	127.131	17750.7	84036.1	12052.7	0.143423	6.97241
1	JL033021_040221_RPA2HFH_Q2_10to1_50B.17120.17120.3	0.000413	R.TSIIGTIGPK[425.27]TNNPETLVALR.K	YAL038W	2491.41	126.126	48985.2	127.129	9638.66	53043.5	5931.07	0.111815	8.94333
1	JL033021_040221_RPA2HFH_Q2_10to1_50B.17134.17134.4	3.76e-09	K.M[147.04]SYETTC[160.03]QFLTK[425.27]AVLDNEREQLDSPSAR.L	YOR341W	3601.71	126.127	31022.4	127.13	4656.54	33604.5	2204.9	0.0656132	15.2408
0.9977	JL033021_040221_RPA2HFH_Q2_10to1_50B.17147.17147.3	7.48e-09	K.FK[407.26]KDFEVNISSLDAR.E	YPR110C	2047.08	126.127	45359.2	127.131	8644.73	49119.4	5191.52	0.105692	9.46147
1	JL033021_040221_RPA2HFH_Q2_10to1_50B.17173.17173.3	2.95e-11	R.SEYVDM[147.04]AIAK[425.27]ALSDGR.T	YOR341W	2038.01	126.128	150424	127.131	32520.6	162862	21344.5	0.131059	7.63017
1	JL033021_040221_RPA2HFH_Q2_10to1_50B.17187.17187.3	4.46e-10	R.TVK[425.27]EVQFGLFSPEEVR.A	RPB1-msCTD,YDL140C	2161.15	126.127	31100.5	127.13	7206.95	33668.1	4930.85	0.146455	6.82806
0.9996	JL033021_040221_RPA2HFH_Q2_10to1_50B.17218.17218.3	0.0198	R.FGVK[425.27]NGVHM[147.04]VFASFIR.T	YAL038W	2121.13	126.127	32844.5	127.13	6638.88	35564.1	4165.56	0.117128	8.53766
1	JL033021_040221_RPA2HFH_Q2_10to1_50B.17236.17236.4	2.51e-05	R.FGVK[425.27]NGVHM[147.04]VFASFIR.T	YAL038W	2121.13	126.127	8166.08	127.13	1946.43	8839.82	1352.67	0.15302	6.5351
1	JL033021_040221_RPA2HFH_Q2_10to1_50B.17237.17237.3	5.95e-05	K.M[147.04]SYETTC[160.03]QFLTK[425.27]AVLDNER.E	YOR341W	2618.24	126.127	27718	127.13	5191.66	30016.5	3074.97	0.102442	9.76158
1	JL033021_040221_RPA2HFH_Q2_10to1_50B.17252.17252.3	7.18e-05	R.TQVLQYLGDK[425.27]FR.V	YPR010C	1763.97	126.127	97878.6	127.131	16457.8	106011	8849.05	0.0834732	11.9799
1	JL033021_040221_RPA2HFH_Q2_10to1_50B.17295.17295.3	1.39e-11	R.K[425.27]VFQM[147.04]NYFSDGLFAEDEYQR.Y	YGL244W	2799.29	126.127	24743.5	127.13	6011.95	26784	4221	0.157594	6.34542
0.9999	JL033021_040221_RPA2HFH_Q2_10to1_50B.17354.17354.3	0.0012	Q.NRTQVLQYLGDK[425.27]FR.V	YPR010C	2034.11	126.127	75839.2	127.131	14893.9	82122.6	9151.69	0.111439	8.97349
0.9901	JL033021_040221_RPA2HFH_Q2_10to1_50B.17372.17372.3	0.0187	K.SQFSNLK[425.27]VVTTTADDAFPSSLRA.K	YJR063W	2751.42	126.127	40720	127.13	8207.74	44091.9	5139.72	0.116568	8.57867
1	JL033021_040221_RPA2HFH_Q2_10to1_50B.17401.17401.3	3.27e-06	K.K[425.27]YNPSALIEHLDVESALK.Y	YOR341W	2323.25	126.127	36228.9	127.13	7915.95	39223.9	5230.21	0.133342	7.49949
1	JL033021_040221_RPA2HFH_Q2_10to1_50B.17402.17402.4	1.71e-07	K.K[425.27]YNPSALIEHLDVESALK.Y	YOR341W	2323.25	126.127	34562.5	127.13	5997.01	37432.5	3323.51	0.0887868	11.2629
1	JL033021_040221_RPA2HFH_Q2_10to1_50B.17409.17409.3	1.43e-06	R.TQVLQYLGDK[425.27]FR.V	YPR010C	1763.97	126.128	821613	127.131	156561	889724	94008.9	0.105661	9.46425
1	JL033021_040221_RPA2HFH_Q2_10to1_50B.17424.17424.3	1.51e-06	R.YQALSDPK[425.27]QLETEPDLFIR.L	YMR186W	2559.33	126.127	40640.3	127.13	7747.33	44009.3	4653.5	0.105739	9.45726
1	JL033021_040221_RPA2HFH_Q2_10to1_50B.17436.17436.3	1.77e-05	K.SISK[425.27]VLLSEVIDK.V	YOR341W	1727.02	126.127	24174.5	127.13	3975.86	26183.7	2090.24	0.0798298	12.5266
1	JL033021_040221_RPA2HFH_Q2_10to1_50B.17437.17437.4	1.99e-12	K.IK[425.27]LLTQATSEDGTSASFQIVEEDHTLGNALR.Y	YNL113W	3640.87	126.127	13795.5	127.13	4226.38	14925.9	3290.45	0.220452	4.53614
0.9996	JL033021_040221_RPA2HFH_Q2_10to1_50B.17447.17447.3	0.0471	R.ADPVALYLGLK[425.27]R.G	YBR154C	1611.94	126.127	98964.9	127.13	18712.5	107170	11167.6	0.104205	9.59651
1	JL033021_040221_RPA2HFH_Q2_10to1_50B.17451.17451.3	0.000269	R.SEYVDM[147.04]AIAK[407.26]ALSDGR.T	YOR341W	2020	126.126	38981.2	127.13	7655.6	42210.8	4704.15	0.111444	8.97308
0.9933	JL033021_040221_RPA2HFH_Q2_10to1_50B.17460.17460.3	0.0131	R.YQALSDPK[425.27]QLETEPDLFIR.L	YMR186W	2559.33	126.127	20540.7	127.13	4889.46	22235.5	3395.46	0.152705	6.54859
1	JL033021_040221_RPA2HFH_Q2_10to1_50B.17475.17475.3	7.35e-18	K.SQFSNLK[425.27]VVTTTADDAFPSSLR.A	YJR063W	2680.38	126.126	32345.7	127.13	6971.15	35020.5	4566.39	0.130392	7.66918
1	JL033021_040221_RPA2HFH_Q2_10to1_50B.17507.17507.3	1.46e-06	R.IINEPTAAAIAYGLGAGK[407.26]SEKER.H	YDL229W,YNL209W	2637.42	126.127	74700.3	127.131	17229.7	80868.2	11756.9	0.145384	6.87834
1	JL033021_040221_RPA2HFH_Q2_10to1_50B.17550.17550.4	0.167	K.SQFSNLK[425.27]VVTTTADDAFPSSLR.A	YJR063W	2680.38	126.127	12759	127.13	2796.7	13813.7	1851.48	0.134032	7.46092
0.9977	JL033021_040221_RPA2HFH_Q2_10to1_50B.17574.17574.3	0.0552	R.AVFSLLNHAANK[425.27]FIR.F	YKR026C	1997.13	126.127	30609.2	127.13	6458.08	33141.5	4172.49	0.125899	7.94285
1	JL033021_040221_RPA2HFH_Q2_10to1_50B.17603.17603.3	0.000187	R.SEYVDM[147.04]AIAK[407.26]ALSDGR.T	YOR341W	2020	126.127	32885.8	127.13	5614.16	35617.4	3063.78	0.086019	11.6253
1	JL033021_040221_RPA2HFH_Q2_10to1_50B.17615.17615.3	5.34e-05	R.YNSTK[425.27]SVDELTSLTDYVTR.M	YMR186W,YPL240C	2488.24	126.127	22545.2	127.13	5125.41	24407.4	3468.35	0.142102	7.03718
0.9993	JL033021_040221_RPA2HFH_Q2_10to1_50B.17642.17642.3	0.00617	K.SQFSNLK[425.27]VVTTTADDAFPSSLR.A	YJR063W	2680.38	126.126	17119.8	127.13	4517.45	18528.7	3303.92	0.178314	5.60809
1	JL033021_040221_RPA2HFH_Q2_10to1_50B.17773.17773.4	2.15e-09	R.LQVK[425.27]TLENNVK[425.27]QFGVPYFGM[147.04]SDAR.Q	YGL009C	3350.75	126.127	28656	127.13	6402.11	31023.8	4287.86	0.138212	7.23526
1	JL033021_040221_RPA2HFH_Q2_10to1_50B.17814.17814.4	2.65e-07	R.LQVK[425.27]TLENNVK[425.27]QFGVPYFGM[147.04]SDAR.Q	YGL009C	3350.75	126.127	21696.8	127.13	4505.71	23492.4	2880.45	0.122612	8.15581
0.9992	JL033021_040221_RPA2HFH_Q2_10to1_50B.17830.17830.4	0.000265	P.K[407.26]VQK[407.26]LVTDYFNGKEPNR.S	YAL005C,YLL024C	2593.42	126.127	12866.5	127.13	2241.88	13934.9	1247.29	0.0895085	11.1721
0.9501	JL033021_040221_RPA2HFH_Q2_10to1_50B.17832.17832.4	0.00178	P.K[407.26]VQK[407.26]LVTDYFNGKEPNR.S	YAL005C,YLL024C	2593.42	126.127	14933.2	127.13	2907.91	16170.6	1775.47	0.109796	9.10779
0.9986	JL033021_040221_RPA2HFH_Q2_10to1_50B.17852.17852.3	0.0469	R.TQVLQYLGDK[425.27]FR.V	YPR010C	1763.97	126.127	27838.6	127.13	7262.45	30130.3	5283.16	0.175344	5.70308
0.9997	JL033021_040221_RPA2HFH_Q2_10to1_50B.17877.17877.3	0.0199	R.NRIDSDK[425.27]LTDSAIDIVDSVR.T	YNL248C	2528.32	126.127	29884.1	127.13	7900.45	32343.2	5783.2	0.178807	5.59262
1	JL033021_040221_RPA2HFH_Q2_10to1_50B.17928.17928.3	1.96e-05	R.LPLQDVYK[425.27]IGGIGTVPVGR.V	YBR118W,YPR080W	2278.31	126.127	43664	127.13	7377.54	47291.4	3985.8	0.0842816	11.865
1	JL033021_040221_RPA2HFH_Q2_10to1_50B.17932.17932.3	0.000104	R.ELYPYQM[147.04]K[425.27]LASLDNLR.T	YPL260W	2266.17	126.126	32215.4	127.13	6431.57	34883.6	3999.88	0.114664	8.72117
1	JL033021_040221_RPA2HFH_Q2_10to1_50B.17977.17977.4	0.00125	R.YVIM[147.04]K[425.27]NPDVEFC[160.03]GYSIPHPSENLLNIR.L	YNL113W	3517.75	126.127	14616.2	127.13	3572.35	15821.4	2515.92	0.15902	6.28851
1	JL033021_040221_RPA2HFH_Q2_10to1_50B.17983.17983.3	5.82e-05	R.K[425.27]NEYLVPVVM[147.04]ILK.A	YPR010C	1858.07	126.127	67425.1	127.131	12074.9	73020.9	6886.29	0.0943057	10.6038
0.97	JL033021_040221_RPA2HFH_Q2_10to1_50B.18012.18012.4	0.0334	E.YNNK[407.26]WAVTWGLATGSGDTAPASDYRGTLVYRSEANGVASR.N	DECOY_sp|P22629|SAV_STRAV_UNMAPPED	4540.22	126.126	7100.43	127.13	2168.24	7682.33	1686.02	0.219467	4.55649
0.9838	JL033021_040221_RPA2HFH_Q2_10to1_50B.18077.18077.3	0.00177	K.SGIGIAGIGTFK[425.27]PELIM[147.04]K.S	YPL234C	2144.2	126.127	32563.5	127.13	7121.66	35255.4	4708.12	0.133543	7.48821
1	JL033021_040221_RPA2HFH_Q2_10to1_50B.18081.18081.3	4.4e-08	R.NEM[147.04]VFALNGK[425.27]PTFEIPYAR.L	YML069W	2509.28	126.127	38614.3	127.13	9766.88	41795.6	6999.49	0.16747	5.97123
0.9945	JL033021_040221_RPA2HFH_Q2_10to1_50B.18090.18090.3	0.00215	K.SGIGIAGIGTFK[425.27]PELIM[147.04]K.S	YPL234C	2144.2	126.127	30916	127.13	5611.06	33481.2	3237.29	0.0966898	10.3423
1	JL033021_040221_RPA2HFH_Q2_10to1_50B.18168.18168.3	2.18e-06	K.LNNVGTGSFDVLAK[425.27]VPNAA.-	YOR341W	2183.17	126.127	41236	127.13	7902.49	44654	4766.3	0.106738	9.36871
1	JL033021_040221_RPA2HFH_Q2_10to1_50B.18235.18235.3	0.000526	R.FPFK[425.27]IPTFR.G	YOL129W	1448.83	126.127	56186.2	127.13	11283.4	60839.2	7047.05	0.115831	8.63329
1	JL033021_040221_RPA2HFH_Q2_10to1_50B.18261.18261.3	7.34e-12	K.VEGK[425.27]TPGLPIDLEIGYVPPSTR.G	YPR010C	2634.43	126.127	28846	127.13	6257.84	31231.1	4116.19	0.131798	7.58737
1	JL033021_040221_RPA2HFH_Q2_10to1_50B.18302.18302.4	1.93e-10	K.VEGK[425.27]TPGLPIDLEIGYVPPSTR.G	YPR010C	2634.43	126.127	11597.1	127.131	2457.35	12556.5	1592.15	0.126799	7.88651
1	JL033021_040221_RPA2HFH_Q2_10to1_50B.18310.18310.3	0.00129	R.LLPQINILQPIK[425.27]GESAR.R	YPR110C	2186.29	126.127	103789	127.13	22451.9	112371	14741.6	0.131188	7.62267
0.9996	JL033021_040221_RPA2HFH_Q2_10to1_50B.18336.18336.3	0.0264	R.NLPSVPNGLVNIEK[425.27]NFER.L	YLR418C	2336.26	126.127	42540.4	127.131	9514.77	46055.3	6376.89	0.138462	7.22222
1	JL033021_040221_RPA2HFH_Q2_10to1_50B.18348.18348.4	6.98e-05	R.EASK[425.27]DNVDFILSNVDLAM[147.04]ANSLRR.V	YIL021W	2990.52	126.126	15990.5	127.13	6501.84	17287.6	5531.75	0.319984	3.12516
0.9946	JL033021_040221_RPA2HFH_Q2_10to1_50B.18385.18385.3	0.106	K.SLNNQFASFIDK[425.27]VR.F	K2C1_HUMAN	1935.03	126.127	24638	127.13	3743.24	26688.3	1799.37	0.0674216	14.832
1	JL033021_040221_RPA2HFH_Q2_10to1_50B.18423.18423.3	4.5e-15	K.VEGK[425.27]TPGLPIDLEIGYVPPSTR.G	YPR010C	2634.43	126.127	78757.5	127.13	15035.7	85286.2	9041.7	0.106016	9.43254
0.9587	JL033021_040221_RPA2HFH_Q2_10to1_50B.18467.18467.4	0.138	K.VEGK[425.27]TPGLPIDLEIGYVPPSTR.G	YPR010C	2634.43	126.127	8145.08	127.13	2858.17	8809.53	2331.56	0.264663	3.77839
1	JL033021_040221_RPA2HFH_Q2_10to1_50B.18475.18475.3	0.00178	R.LLPQINILQPIK[425.27]GESAR.R	YPR110C	2186.29	126.127	60576.9	127.13	14126.9	65577.3	9699.99	0.147917	6.76056
0.983	JL033021_040221_RPA2HFH_Q2_10to1_50B.18478.18478.3	0.00396	R.LM[147.04]NAFVTIQNDVNAFIDSTK[425.27]AQGR.T	YOR341W	2965.5	126.126	31205.9	127.129	7776.64	33777.8	5531.86	0.163772	6.10604
0.984	JL033021_040221_RPA2HFH_Q2_10to1_50B.18493.18493.4	0.116	K.SREKKESSSSSK[407.26]TSDPSITGTAPAKPSHR.L	DECOY_YMR021C_UNMAPPED	3321.7	126.127	11489	127.131	2575.89	12438.3	1728.87	0.138996	7.19443
1	JL033021_040221_RPA2HFH_Q2_10to1_50B.18507.18507.4	2.62e-07	V.C[160.03]SRK[425.27]WPTIDM[147.04]PFSETGIQPDIIINPHAFPSR.M	YPR010C	3922.96	126.126	11203.4	127.13	2621.38	12128.1	1803.26	0.148685	6.72563
1	JL033021_040221_RPA2HFH_Q2_10to1_50B.18570.18570.3	1.08e-12	K.VEGK[425.27]TPGLPIDLEIGYVPPSTR.G	YPR010C	2634.43	126.127	32633	127.13	10045.5	35306.7	7834.98	0.221912	4.50629
1	JL033021_040221_RPA2HFH_Q2_10to1_50B.18581.18581.3	0.000644	R.QLHNK[407.26]GIYPPINVLPSLSR.L	YBR127C	2424.37	126.127	48535.2	127.13	10130.9	52551.5	6498.9	0.123667	8.0862
0.9939	JL033021_040221_RPA2HFH_Q2_10to1_50B.18617.18617.4	0.00783	P.LIKQNKTITK[407.26]K[407.26]EHSDVR.G	YPL159C	2595.5	126.127	23600.4	127.131	6574.31	25539.7	4926.23	0.192885	5.18444
1	JL033021_040221_RPA2HFH_Q2_10to1_50B.18661.18661.4	0.000593	K.LIDLTQFPAFVTPM[147.04]GK[425.27]GSIDEQHPR.Y	YLR044C	3109.6	126.127	15120.9	127.13	2932.94	16374	1785.43	0.109041	9.17089
0.9989	JL033021_040221_RPA2HFH_Q2_10to1_50B.18685.18685.3	0.0357	R.IVGSELIQK[425.27]YLGDGPR.L	YDL007W	2041.13	126.127	18645.5	127.13	5113.98	20178.4	3806.18	0.188627	5.30147
1	JL033021_040221_RPA2HFH_Q2_10to1_50B.18702.18702.3	1.14e-07	R.K[425.27]NVEVVALNDPFISNDYSAYM[147.04]FK.Y	YJR009C	2976.47	126.127	15383.7	127.13	5223	16640.1	4215.84	0.253354	3.94705
1	JL033021_040221_RPA2HFH_Q2_10to1_50B.18744.18744.3	3.08e-07	R.K[425.27]NVEVVALNDPFISNDYSAYM[147.04]FK.Y	YJR009C	2976.47	126.127	19086.4	127.13	5263.38	20655.2	3926.71	0.190107	5.26019
1	JL033021_040221_RPA2HFH_Q2_10to1_50B.18802.18802.4	2.59e-05	R.K[425.27]LVK[425.27]ADSFFM[147.04]DVLVVPPTR.F	YOR341W	2771.55	126.127	14336.1	127.13	3637.33	15517.1	2610.7	0.168247	5.94365
0.9543	JL033021_040221_RPA2HFH_Q2_10to1_50B.18846.18846.4	0.0457	R.TLYDK[425.27]VFDAHVVHQDENGSFLLYIDR.H	YGL009C	3390.7	126.127	16311.4	127.13	3584.55	17659.6	2376.83	0.134591	7.42993
1	JL033021_040221_RPA2HFH_Q2_10to1_50B.18879.18879.3	3.16e-05	R.GFTLAEVK[425.27]AAGLTAAYAR.T	YDL082W,YMR142C	2106.16	126.126	23081.7	127.13	6057.75	24981.5	4419.27	0.176902	5.65286
1	JL033021_040221_RPA2HFH_Q2_10to1_50B.18884.18884.3	0.000276	R.GFTLAEVK[425.27]AAGLTAAYAR.T	YDL082W,YMR142C	2106.16	126.127	22850.3	127.13	5713.31	24733.3	4070.95	0.164593	6.07558
0.998	JL033021_040221_RPA2HFH_Q2_10to1_50B.19011.19011.3	0.0285	R.M[147.04]VPLAM[147.04]GIVSVSDPQM[147.04]K[425.27]VFDTLTR.F	YHR027C	2979.52	126.127	18198.8	127.13	5865.71	19687.7	4651.82	0.23628	4.23227
0.9985	JL033021_040221_RPA2HFH_Q2_10to1_50B.19121.19121.4	0.00659	R.SK[425.27]IVTLPPTIFKPYPLWTGK.Q	YOR341W	2582.5	126.127	11237.1	127.13	2390.01	12166.6	1552.31	0.127588	7.83773
1	JL033021_040221_RPA2HFH_Q2_10to1_50B.19151.19151.3	5.1e-07	R.IVVGK[425.27]LNNVGTGSFDVLAK[425.27]VPNAA.-	YOR341W	2976.68	126.127	34520	127.13	9138.64	37360.5	6693.84	0.179169	5.58132
1	JL033021_040221_RPA2HFH_Q2_10to1_50B.19161.19161.3	2.95e-12	R.IVVGK[425.27]LNNVGTGSFDVLAK[425.27]VPNAA.-	YOR341W	2976.68	126.127	50951	127.13	10800.6	55165.8	6999.67	0.126884	7.8812
1	JL033021_040221_RPA2HFH_Q2_10to1_50B.19172.19172.4	2.19e-06	R.IVVGK[425.27]LNNVGTGSFDVLAK[425.27]VPNAA.-	YOR341W	2976.68	126.127	21872.9	127.13	5144.91	23678.1	3549.59	0.14991	6.67066
1	JL033021_040221_RPA2HFH_Q2_10to1_50B.19179.19179.4	4.32e-06	R.IVVGK[425.27]LNNVGTGSFDVLAK[425.27]VPNAA.-	YOR341W	2976.68	126.127	24644.7	127.13	4291.16	26691.1	2385.9	0.0893893	11.187
1	JL033021_040221_RPA2HFH_Q2_10to1_50B.19196.19196.4	1.56e-06	R.K[425.27]WPTIDMPFSETGIQPDIIINPHAFPSR.M	YPR010C	3503.8	126.127	9207.39	127.13	2922.56	9961.05	2305.19	0.23142	4.32114
1	JL033021_040221_RPA2HFH_Q2_10to1_50B.19236.19236.3	6.78e-05	R.IDSDK[425.27]LTDSAIDIVDSVR.T	YNL248C	2258.17	126.126	20844.6	127.13	3852.95	22573.5	2257.47	0.100005	9.99946
1	JL033021_040221_RPA2HFH_Q2_10to1_50B.19266.19266.3	3.27e-05	K.DGFTK[425.27]IFETALNEK.Q	YOR341W	1908.99	126.127	9970.08	127.13	1530.07	10799.6	744.556	0.0689427	14.5048
1	JL033021_040221_RPA2HFH_Q2_10to1_50B.19301.19301.3	0.000396	K.DNNLLGK[425.27]FELSGIPPAPR.G	YAL005C,YBL075C,YER103W,YLL024C	2234.21	126.127	21561.8	127.13	4194.72	23348.6	2559.32	0.109613	9.12297
1	JL033021_040221_RPA2HFH_Q2_10to1_50B.19362.19362.3	0.000481	R.NHFIFNVESAGAMTPEEIFFK[407.26]S.V	YPR110C	2793.36	126.127	14210.6	127.13	4537.97	15373.6	3587.08	0.233327	4.28583
1	JL033021_040221_RPA2HFH_Q2_10to1_50B.19369.19369.3	2.82e-05	R.NHFIFNVESAGAMTPEEIFFK[425.27]S.V	YPR110C	2811.37	126.127	13931.3	127.13	4114.86	15074.2	3158.75	0.209547	4.7722
1	JL033021_040221_RPA2HFH_Q2_10to1_50B.19388.19388.3	4.99e-05	R.NHFIFNVESAGAM[147.04]TPEEIFFK[425.27]S.V	YPR110C	2827.36	126.127	16967.1	127.13	5700.83	18353.3	4585.72	0.249858	4.00228
1	JL033021_040221_RPA2HFH_Q2_10to1_50B.19391.19391.3	5.35e-08	R.NHFIFNVESAGAM[147.04]TPEEIFFK[425.27].S	YPR110C	2740.33	126.126	16817.9	127.13	5143.96	18196.1	4002.37	0.219957	4.54634
1	JL033021_040221_RPA2HFH_Q2_10to1_50B.19413.19413.3	0.00101	K.DNNLLGK[425.27]FELSGIPPAPR.G	YAL005C,YBL075C,YER103W,YLL024C	2234.21	126.127	17936.9	127.13	4041.87	19418.8	2720.94	0.140119	7.13678
0.9995	JL033021_040221_RPA2HFH_Q2_10to1_50B.19419.19419.3	0.222	K.DGFTK[425.27]IFETALNEK.Q	YOR341W	1908.99	126.127	6628.61	127.13	1486.41	7176.27	997.738	0.139033	7.19254
1	JL033021_040221_RPA2HFH_Q2_10to1_50B.19427.19427.3	3.36e-06	R.NHFIFNVESAGAM[147.04]TPEEIFFK[425.27]S.V	YPR110C	2827.36	126.127	14997.3	127.13	5839.37	16215.9	4911.02	0.302851	3.30195
0.9771	JL033021_040221_RPA2HFH_Q2_10to1_50B.19431.19431.3	0.00796	R.DNNK[407.26]SGILDAVTSSKVNAITSQVVSK.C	YOR341W	2953.58	126.127	21202.6	127.13	4749.82	22954.5	3186.4	0.138814	7.20389
0.9625	JL033021_040221_RPA2HFH_Q2_10to1_50B.19447.19447.3	0.0889	R.NHFIFNVESAGAM[147.04]TPEEIFFK[425.27]S.V	YPR110C	2827.36	126.127	18937.7	127.13	6507.1	20483.7	5272.8	0.257414	3.88479
1	JL033021_040221_RPA2HFH_Q2_10to1_50B.19462.19462.3	3.58e-08	R.SK[425.27]IVTLPPTIFKPYPLWTGK.Q	YOR341W	2582.5	126.126	20297.9	127.13	5453.58	21967.6	4021.75	0.183077	5.46219
0.9991	JL033021_040221_RPA2HFH_Q2_10to1_50B.19470.19470.3	0.00015	K.M[147.04]K[407.26]ETAESYLGAKVNDAVVTVPAYFNDSQR.Q	YAL005C,YLL024C	3497.72	126.127	10016.6	127.13	2892.74	10838.9	2200.59	0.203028	4.92543
1	JL033021_040221_RPA2HFH_Q2_10to1_50B.19479.19479.3	0.015	K.DNNLLGK[425.27]FELSGIPPAPR.G	YAL005C,YBL075C,YER103W,YLL024C	2234.21	126.127	18453.4	127.13	4489.54	19975.1	3154.29	0.157911	6.33269
1	JL033021_040221_RPA2HFH_Q2_10to1_50B.19490.19490.3	1.71e-11	R.EASK[425.27]DNVDFILSNVDLAM[147.04]ANSLR.R	YIL021W	2834.42	126.126	20310.8	127.13	8788.41	21954	7594.14	0.345911	2.89092
1	JL033021_040221_RPA2HFH_Q2_10to1_50B.19492.19492.3	0.000461	K.DISSTLLNELKSK[407.26]R.S	YOR341W	1882.06	126.127	39297.7	127.131	6150.85	42566.5	3063.27	0.0719642	13.8958
0.9733	JL033021_040221_RPA2HFH_Q2_10to1_50B.19498.19498.3	0.345	K.DISSTLLNELK[425.27]SK[425.27].R	YOR341W	2041.15	126.127	17837	127.13	4687.78	19305.1	3422.06	0.177262	5.64136
1	JL033021_040221_RPA2HFH_Q2_10to1_50B.19513.19513.4	2.61e-06	R.K[425.27]WPTIDM[147.04]PFSETGIQPDIIINPHAFPSR.M	YPR010C	3519.79	126.127	13398.9	127.13	4548.46	14493.2	3671.19	0.253305	3.94781
0.9573	JL033021_040221_RPA2HFH_Q2_10to1_50B.19584.19584.3	0.75	R.EASK[425.27]DNVDFILSNVDLAM[147.04]ANSLR.R	YIL021W	2834.42	126.126	15731	127.13	4569.01	17022.1	3483.85	0.204666	4.886
0.9953	JL033021_040221_RPA2HFH_Q2_10to1_50B.19620.19620.3	0.111	R.SK[425.27]IVTLPPTIFKPYPLWTGK.Q	YOR341W	2582.5	126.127	20007.9	127.13	5864.13	21649.6	4487.72	0.207289	4.82419
1	JL033021_040221_RPA2HFH_Q2_10to1_50B.19625.19625.4	1.82e-05	R.SK[425.27]IVTLPPTIFKPYPLWTGK.Q	YOR341W	2582.5	126.127	20025.8	127.13	3872.16	21685.4	2351.56	0.108439	9.22173
1	JL033021_040221_RPA2HFH_Q2_10to1_50B.19628.19628.4	0.00523	R.TASGNIIPSSTGAAKAVGK[407.26]VLPELQGK.L	YGR192C,YJL052W,YJR009C	2872.61	126.127	14322.9	127.13	4130.42	15498.7	3140.28	0.202615	4.93546
0.9513	JL033021_040221_RPA2HFH_Q2_10to1_50B.19660.19660.3	2.76e-06	R.TASGNIIPSSTGAAKAVGK[407.26]VLPELQGK.L	YGR192C,YJL052W,YJR009C	2872.61	126.127	46265.3	127.13	9305.68	50096.6	5818.43	0.116144	8.60999
0.9994	JL033021_040221_RPA2HFH_Q2_10to1_50B.19691.19691.3	0.0219	R.M[147.04]ILTHVDLIEK[425.27]FLR.Y	YOR210W	2040.15	126.127	23558.9	127.13	6012.94	25499.4	4328.4	0.169745	5.89118
1	JL033021_040221_RPA2HFH_Q2_10to1_50B.19698.19698.4	1.79e-14	R.K[425.27]WPTIDM[147.04]PFSETGIQPDIIINPHAFPSR.M	YPR010C	3519.79	126.127	27173.3	127.13	5779.97	29421	3754.29	0.127606	7.83664
1	JL033021_040221_RPA2HFH_Q2_10to1_50B.19703.19703.3	0.00232	K.LVK[425.27]ADSFFM[147.04]DVLVVPPTR.F	YOR341W	2346.27	126.126	15230.2	127.13	4061.6	16483.2	2985.07	0.181098	5.52189
1	JL033021_040221_RPA2HFH_Q2_10to1_50B.19709.19709.3	1.09e-07	R.EIFDGIIGNDVK[425.27]DSFLTDR.L	YPR010C	2450.24	126.126	28115.9	127.13	6474.88	30437.5	4414.32	0.145029	6.89517
1	JL033021_040221_RPA2HFH_Q2_10to1_50B.19722.19722.3	6.46e-06	R.IPK[407.26]VQKLVTDYFNGK.E	YAL005C,YLL024C	2028.15	126.127	11593.3	127.13	3257.86	12545.7	2450.31	0.19531	5.12006
0.9552	JL033021_040221_RPA2HFH_Q2_10to1_50B.19723.19723.3	0.0265	R.K[425.27]WPTIDM[147.04]PFSETGIQPDIIINPHAFPSR.M	YPR010C	3519.79	126.127	12481.7	127.13	4375.79	13500	3568.5	0.264335	3.78308
0.9784	JL033021_040221_RPA2HFH_Q2_10to1_50B.19878.19878.3	3.26e-05	R.KDGFTK[407.26]IFETALNEK.Q	YOR341W	2019.08	126.127	13312.6	127.13	3431.34	14408.9	2481.85	0.172245	5.80568
0.9908	JL033021_040221_RPA2HFH_Q2_10to1_50B.19893.19893.3	6.09e-07	R.GYFITQEEVELPLEDFK[425.27]AK.Y	YBR154C	2552.31	126.127	24804.5	127.13	7350.78	26839.1	5650.19	0.210521	4.75012
0.9997	JL033021_040221_RPA2HFH_Q2_10to1_50B.19913.19913.3	0.00873	R.AALYK[425.27]EVYNVIASDGSYVNYR.H	RPB1-msCTD,YDL140C	2691.36	126.127	16900.5	127.13	6187.25	18277.1	5112.94	0.279745	3.57468
1	JL033021_040221_RPA2HFH_Q2_10to1_50B.19947.19947.4	0.000218	K.DGFTK[425.27]IFETALNEK[425.27]QITNNR.V	YOR341W	2932.55	126.126	21978	127.13	4447.09	23797.8	2792.4	0.117339	8.52235
1	JL033021_040221_RPA2HFH_Q2_10to1_50B.19968.19968.3	2.55e-14	R.AALYK[425.27]EVYNVIASDGSYVNYR.H	RPB1-msCTD,YDL140C	2691.36	126.127	20508.2	127.13	13198.7	22131.8	12302.4	0.55587	1.79898
0.9992	JL033021_040221_RPA2HFH_Q2_10to1_50B.20014.20014.3	0.00396	N.K[407.26]TK[407.26]LLERLNSPPEILVDGILSR.F	YNL248C	3048.79	126.127	13952.4	127.13	6476.51	15077.6	5687.56	0.377219	2.65098
1	JL033021_040221_RPA2HFH_Q2_10to1_50B.20049.20049.4	2.7e-08	R.AALYK[425.27]EVYNVIASDGSYVNYR.H	RPB1-msCTD,YDL140C	2691.36	126.127	6096.61	127.13	2499.66	6590.98	2131.28	0.323363	3.0925
1	JL033021_040221_RPA2HFH_Q2_10to1_50B.20065.20065.3	0.000718	R.VNENIGSK[425.27]M[147.04]QYFLSTGNLVSQSGLDLQQVSGYTVVAEK.L	YPR010C	4416.22	126.127	4469.62			4847.17	-401.251	-0.0827804	-12.0802
1	JL033021_040221_RPA2HFH_Q2_10to1_50B.20079.20079.4	8.12e-09	R.NHFIFNVESAGAM[147.04]TPEEIFFK[425.27]SVR.L	YPR110C	3082.53	126.127	16603.9	127.13	4481.84	17969.5	3312.07	0.184316	5.42546
1	JL033021_040221_RPA2HFH_Q2_10to1_50B.20080.20080.3	0.000822	R.VNENIGSK[425.27]M[147.04]QYFLSTGNLVSQSGLDLQQVSGYTVVAEK.L	YPR010C	4416.22	126.127	3290.55	127.13	1055.09	3559.81	835.218	0.234624	4.26213
1	JL033021_040221_RPA2HFH_Q2_10to1_50B.20112.20112.3	5.26e-05	R.VNENIGSK[425.27]M[147.04]QYFLSTGNLVSQSGLDLQQVSGYTVVAEK.L	YPR010C	4416.22	126.127	2798.37	127.131	790.768	3028.23	596.155	0.196866	5.0796
1	JL033021_040221_RPA2HFH_Q2_10to1_50B.20135.20135.3	2.92e-07	R.AALYK[425.27]EVYNVIASDGSYVNYR.H	RPB1-msCTD,YDL140C	2691.36	126.127	14395.7	127.13	5899.03	15563.1	5028.95	0.323133	3.09471
1	JL033021_040221_RPA2HFH_Q2_10to1_50B.20140.20140.4	3.73e-07	R.VNENIGSK[425.27]M[147.04]QYFLSTGNLVSQSGLDLQQVSGYTVVAEK.L	YPR010C	4416.22	126.127	9679.58	127.13	2673.13	10475.2	1995.52	0.1905	5.24935
1	JL033021_040221_RPA2HFH_Q2_10to1_50B.20160.20160.3	2.37e-08	K.AIYPK[407.26]SQFSNLKVVTTTADDAFPSSLR.A	YJR063W	3234.7	126.127	14964.8	127.13	4737.01	16189.8	3732.66	0.230555	4.33735
0.9893	JL033021_040221_RPA2HFH_Q2_10to1_50B.20177.20177.3	5.48e-09	R.KLVK[407.26]ADSFFM[147.04]DVLVVPPTR.F	YOR341W	2456.36	126.126	24551.6	127.13	5991.85	26576.1	4216.68	0.158664	6.30261
0.9808	JL033021_040221_RPA2HFH_Q2_10to1_50B.20183.20183.3	8.06e-07	K.TK[407.26]DNNLLGKFELSGIPPAPR.G	YAL005C,YBL075C,YER103W,YLL024C	2445.35	126.127	20574	127.131	6275.17	22260.2	4877.36	0.219107	4.56398
1	JL033021_040221_RPA2HFH_Q2_10to1_50B.20281.20281.3	1.33e-06	S.K[425.27]IVTLPPTIFKPYPLWTGK.Q	YOR341W	2495.46	126.127	14793.6	127.131	5323.84	15999.4	4376.87	0.273565	3.65544
0.9991	JL033021_040221_RPA2HFH_Q2_10to1_50B.20329.20329.3	5.73e-14	R.KLVK[407.26]ADSFFM[147.04]DVLVVPPTR.F	YOR341W	2456.36	126.127	85720	127.131	18337.2	92809.6	11954.4	0.128806	7.7636
0.9999	JL033021_040221_RPA2HFH_Q2_10to1_50B.20338.20338.3	0.00024	C.GK[407.26]VVGDK[407.26]WESYLNLLQEDELDEGTALSR.L	YOR210W	3721.9	126.127	7905.89	127.13	2453.89	8553.47	1919.81	0.224448	4.45537
1	JL033021_040221_RPA2HFH_Q2_10to1_50B.20341.20341.3	2.62e-07	K.VTK[425.27]TIAQDSFDILSFDDSNTLIR.K	YBL017C	2895.49	126.127	18909.3	127.13	6631.08	20452	5408.2	0.264435	3.78165
1	JL033021_040221_RPA2HFH_Q2_10to1_50B.20423.20423.3	8.78e-07	K.VTK[425.27]TIAQDSFDILSFDDSNTLIR.K	YBL017C	2895.49	126.127	19176.4	127.13	6689.95	20741.1	5447.31	0.262633	3.80759
0.9926	JL033021_040221_RPA2HFH_Q2_10to1_50B.20485.20485.3	8.31e-10	R.KLVK[407.26]ADSFFM[147.04]DVLVVPPTR.F	YOR341W	2456.36	126.127	23627.4	127.13	6778.18	25567.4	5142.28	0.201127	4.97199
1	JL033021_040221_RPA2HFH_Q2_10to1_50B.20501.20501.3	0.00177	R.LESYVASIEQTVTDPVLSSK[407.26]LKR.G	YDL229W,YNL209W	2841.56	126.127	20790.1	127.13	5606.23	22500.1	4141.15	0.184051	5.43329
0.9773	JL033021_040221_RPA2HFH_Q2_10to1_50B.20585.20585.3	2.45e-08	R.K[407.26]LVKADSFFM[147.04]DVLVVPPTR.F	YOR341W	2456.36	126.127	15357.3	127.13	5073.36	16612.7	4057.85	0.244261	4.09397
1	JL033021_040221_RPA2HFH_Q2_10to1_50B.20636.20636.3	1.26e-05	R.LQVK[407.26]TLENNVKQFGVPYFGM[147.04]SDAR.Q	YGL009C	3035.56	126.127	18839.6	127.13	6599.33	20376.6	5380.43	0.264049	3.78717
0.9517	JL033021_040221_RPA2HFH_Q2_10to1_50B.20675.20675.3	3.04e-06	K.VGGVVLGYEGLK[425.27]ILDADPLSK.E	YOR340C	2439.37	126.127	19112.8	127.13	6042.32	20677.5	4759.03	0.230155	4.3449
1	JL033021_040221_RPA2HFH_Q2_10to1_50B.20793.20793.3	1.7e-05	R.SVSEIEIESVQDQPSVAVGSFFK[425.27]GFR.A	YNL248C	3138.6	126.127	16466.2	127.13	7510.9	17795.2	6570.32	0.369219	2.70842
1	JL033021_040221_RPA2HFH_Q2_10to1_50B.20831.20831.3	0.000346	K.TLLAK[425.27]AVATEVSANFISVK.G	YDL126C	2258.3	126.127	14093	127.13	4253.98	15248.4	3293.32	0.215978	4.6301
1	JL033021_040221_RPA2HFH_Q2_10to1_50B.20837.20837.3	5.16e-07	K.TLLAK[425.27]AVATEVSANFISVK.G	YDL126C	2258.3	126.127	14171.3	127.13	4590.55	15330.5	3646.95	0.237889	4.20365
1	JL033021_040221_RPA2HFH_Q2_10to1_50B.20919.20919.3	0.000138	K.TLLAK[425.27]AVATEVSANFISVK.G	YDL126C	2258.3	126.127	15641.6	127.13	4183.45	16928.3	3078.72	0.181868	5.4985
0.9995	JL033021_040221_RPA2HFH_Q2_10to1_50B.20986.20986.3	0.0174	R.GLVK[407.26]SPIKVVGLSTLPEIYEK.M	YOL086C	2548.5	126.127	13764.7	127.13	5125.7	14885.2	4256.91	0.285983	3.49671
0.9754	JL033021_040221_RPA2HFH_Q2_10to1_50B.20996.20996.4	0.0061	V.INGPDK[425.27]WPGATQIQNEDGSLVSLIGM[147.04]SVEQR.K	YOR341W	3651.83	126.127	10573.9	127.13	4890.29	11426.7	4291.1	0.375532	2.66289
1	JL033021_040221_RPA2HFH_Q2_10to1_50B.21051.21051.3	0.000765	K.EK[425.27]IDEYLQNIIAQVR.M	YPR010C	2128.16	126.127	7067.62	127.13	2917.71	7640.56	2492.08	0.326165	3.06594
0.9853	JL033021_040221_RPA2HFH_Q2_10to1_50B.21149.21149.3	1.12	K.IVTLPPTIFK[425.27]PYPLWTGK.Q	YOR341W	2367.37	126.126	15229.2	127.13	4433.73	16479	3383.93	0.205348	4.86978
0.9997	JL033021_040221_RPA2HFH_Q2_10to1_50B.21153.21153.3	0.134	K.IVTLPPTIFK[425.27]PYPLWTGK.Q	YOR341W	2367.37	126.126	17207.3	127.13	4290.15	18625.5	3052.5	0.163888	6.10172
0.9998	JL033021_040221_RPA2HFH_Q2_10to1_50B.21164.21164.3	0.000311	V.INGPDK[425.27]WPGATQIQNEDGSLVSLIGM[147.04]SVEQR.K	YOR341W	3651.83	126.127	6636.71	127.13	3550.01	7168.05	3208.33	0.447587	2.2342
0.9709	JL033021_040221_RPA2HFH_Q2_10to1_50B.21312.21312.3	0.00043	K.IVTLPPTIFK[425.27]PYPLWTGK.Q	YOR341W	2367.37	126.127	21742.9	127.13	6211.74	23528.3	4704.47	0.19995	5.00126
0.9839	JL033021_040221_RPA2HFH_Q2_10to1_50B.21391.21391.3	0.411	K.IVTLPPTIFK[425.27]PYPLWTGK.Q	YOR341W	2367.37	126.126	13638.1	127.13	4442.93	14753.5	3536.63	0.239715	4.17161
0.9761	JL033021_040221_RPA2HFH_Q2_10to1_50B.21392.21392.3	0.0231	S.QFSNLK[425.27]VVTTTADDAFPSSLR.A	YJR063W	2593.35	126.127	15186.5	127.13	4844.87	16429.4	3828.34	0.233017	4.29153
1	JL033021_040221_RPA2HFH_Q2_10to1_50B.21420.21420.3	2.37e-05	R.IK[407.26]QTFKNDLFVIWSEDNDEKLIIR.C	RPB1-msCTD,YDL140C	3242.74	126.127	18604.5	127.13	8434.53	20106.5	7368.11	0.366453	2.72886
1	JL033021_040221_RPA2HFH_Q2_10to1_50B.21447.21447.4	9.4e-11	R.IKQTFK[407.26]NDLFVIWSEDNDEKLIIR.C	RPB1-msCTD,YDL140C	3242.74	126.127	11907.5	127.13	6899.22	12856.4	6324.11	0.491903	2.03292
1	JL033021_040221_RPA2HFH_Q2_10to1_50B.21474.21474.3	6.81e-07	R.IK[407.26]QTFKNDLFVIWSEDNDEKLIIR.C	RPB1-msCTD,YDL140C	3242.74	126.127	15794.1	127.13	8276.6	17060	7451.17	0.436761	2.28958
0.9999	JL033021_040221_RPA2HFH_Q2_10to1_50B.21493.21493.3	0.015	K.SIIAPSYGDIFYNNSFK[425.27]NGLLPIR.L	YGL009C	2995.59	126.127	26130.1	127.13	8024.76	28271.1	6253.42	0.221195	4.5209
1	JL033021_040221_RPA2HFH_Q2_10to1_50B.21600.21600.4	0.00688	K.LGEEVHENSQNQLLSK[425.27]VLTTSLLIR.D	YOR341W	3117.71	126.127	9497.75	127.13	4058.45	10266.6	3496.32	0.340554	2.93639
0.9786	JL033021_040221_RPA2HFH_Q2_10to1_50B.21601.21601.4	0.143	R.QAVINGPDK[425.27]WPGATQIQNEDGSLVSLIGM[147.04]SVEQR.K	YOR341W	3949.99	126.127	13135.8	127.13	4688.54	14206.8	3844.91	0.270639	3.69496
1	JL033021_040221_RPA2HFH_Q2_10to1_50B.21668.21668.3	0.000818	K.IQGLEGIILTNIVSNSDKVAENKEDK[407.26].Q	YBL017C	3105.66	126.127	15569	127.13	7295.19	16824	6419.72	0.381581	2.62067
0.9983	JL033021_040221_RPA2HFH_Q2_10to1_50B.21736.21736.3	0.000601	V.INGPDK[407.26]WPGATQIQNEDGSLVSLIGM[147.04]SVEQR.K	YOR341W	3633.82	126.127	8979.48	127.13	5151.28	9695.51	4713.9	0.486194	2.05679
0.9586	JL033021_040221_RPA2HFH_Q2_10to1_50B.21832.21832.6	0.26	K.LVPSIPPATIETFNEAALVVNITHHELVPK[425.27]HIR.L	YBR154C	3952.2	126.127	7647.74	127.13	2912.33	8269.73	2434.24	0.294355	3.39725
0.9994	JL033021_040221_RPA2HFH_Q2_10to1_50B.21844.21844.5	0.018	K.LVPSIPPATIETFNEAALVVNITHHELVPK[425.27]HIR.L	YBR154C	3952.2	126.127	11069.9	127.13	4075.6	11971.4	3373.57	0.281803	3.54858
0.974	JL033021_040221_RPA2HFH_Q2_10to1_50B.21861.21861.3	0.0815	R.SK[407.26]IVTLPPTIFKPYPLWTGK.Q	YOR341W	2564.49	126.127	19875.5	127.13	6543.84	21500.4	5227.98	0.243157	4.11256
1	JL033021_040221_RPA2HFH_Q2_10to1_50B.22302.22302.3	0.000828	R.DLGFGTILNFTTK[425.27]IGAGM[147.04]GEQM[147.04]LSR.E	YGR032W,YLR342W	2985.5	126.127	19858.2	127.13	7891.7	21470.6	6673.87	0.310838	3.21711
1	JL033021_040221_RPA2HFH_Q2_10to1_50B.22527.22527.3	1.82e-07	K.VLLSEVIDK[425.27]VIVTETTGTSNTAGGNAAR.S	YOR341W	3112.67	126.127	14507.5	127.13	6813.3	15676.7	5998.63	0.382645	2.61339
1	JL033021_040221_RPA2HFH_Q2_10to1_50B.22536.22536.3	2.41e-05	K.VLLSEVIDK[425.27]VIVTETTGTSNTAGGNAAR.S	YOR341W	3112.67	126.127	14808.6	127.13	7365.22	15998.7	6563.03	0.410222	2.43771
1	JL033021_040221_RPA2HFH_Q2_10to1_50B.22542.22542.3	7.01e-07	K.VLLSEVIDK[425.27]VIVTETTGTSNTAGGNAAR.S	YOR341W	3112.67	126.127	17809.5	127.13	7315.8	19253.5	6240.67	0.324131	3.08517
1	JL033021_040221_RPA2HFH_Q2_10to1_50B.22876.22876.3	2.12e-06	K.VLLSEVIDK[425.27]VIVTETTGTSNTAGGNAAR.S	YOR341W	3112.67	126.127	13496	127.13	6666.68	14581.1	5932.32	0.406851	2.4579
1	JL033021_040221_RPA2HFH_Q2_10to1_50B.22887.22887.3	3.02e-08	K.VLLSEVIDK[425.27]VIVTETTGTSNTAGGNAAR.S	YOR341W	3112.67	126.127	17716	127.13	7222.07	19152.9	6148.62	0.321029	3.11499
1	JL033021_040221_RPA2HFH_Q2_10to1_50B.22905.22905.4	7.33e-07	K.VLLSEVIDK[425.27]VIVTETTGTSNTAGGNAAR.S	YOR341W	3112.67	126.127	6530.28	127.13	3449.45	7053.46	3110.13	0.440937	2.2679
1	JL033021_040221_RPA2HFH_Q2_10to1_50B.22916.22916.4	2.9e-07	K.VLLSEVIDK[425.27]VIVTETTGTSNTAGGNAAR.S	YOR341W	3112.67	126.127	6442.67	127.13	2597.07	6965.47	2204.59	0.316503	3.15953
1	JL033021_040221_RPA2HFH_Q2_10to1_50B.23054.23054.3	1.32e-15	K.VLLSEVIDK[425.27]VIVTETTGTSNTAGGNAAR.S	YOR341W	3112.67	126.127	25561.4	127.13	9139.6	27645.2	7499.11	0.271263	3.68646
1	JL033021_040221_RPA2HFH_Q2_10to1_50B.23074.23074.4	3.7e-05	R.NLSAK[425.27]QITNPTVLDNLGHPVSGGLYDLALGAFLR.N	YOR341W	3861.09	126.127	11234.6	127.13	5931.39	12134.7	5347.4	0.440669	2.26928
1	JL033021_040221_RPA2HFH_Q2_10to1_50B.23088.23088.4	3.07e-10	K.VLLSEVIDK[425.27]VIVTETTGTSNTAGGNAAR.S	YOR341W	3112.67	126.127	7664.25	127.13	3444.24	8283.25	3002.75	0.362508	2.75856
1	JL033021_040221_RPA2HFH_Q2_10to1_50B.23099.23099.3	1.15e-10	R.M[147.04]K[425.27]AIAPNLTQLVGELVGAR.L	YOR310C	2293.29	126.127	8033.77	127.13	4235.96	8677.47	3817.96	0.439986	2.2728
1	JL033021_040221_RPA2HFH_Q2_10to1_50B.23102.23102.4	0.00175	K.VLLSEVIDK[425.27]VIVTETTGTSNTAGGNAAR.S	YOR341W	3112.67	126.127	6822.92	127.13	2566.53	7378.1	2137.74	0.289741	3.45136
1	JL033021_040221_RPA2HFH_Q2_10to1_50B.23103.23103.3	2.37e-15	K.VLLSEVIDK[425.27]VIVTETTGTSNTAGGNAAR.S	YOR341W	3112.67	126.127	20509.4	127.13	8518.87	22171.6	7287.48	0.328685	3.04243
1	JL033021_040221_RPA2HFH_Q2_10to1_50B.23109.23109.4	3.4e-12	R.NLSAK[425.27]QITNPTVLDNLGHPVSGGLYDLALGAFLR.N	YOR341W	3861.09	126.127	13626.5	127.13	4914.29	14737	4042.77	0.274328	3.64527
0.9999	JL033021_040221_RPA2HFH_Q2_10to1_50B.23132.23132.3	0.000601	K.VLLSEVIDK[425.27]VIVTETTGTSNTAGGNAAR.S	YOR341W	3112.67	126.127	17946.2	127.13	6614.06	19407.6	5476.43	0.28218	3.54384
1	JL033021_040221_RPA2HFH_Q2_10to1_50B.23296.23296.3	5.89e-06	R.AAAPTVVFLDELDSIAK[425.27]AR.G	YDL126C	2283.26	126.127	9012.7	127.13	3181.11	9747.78	2599.72	0.266699	3.74955
1	JL033021_040221_RPA2HFH_Q2_10to1_50B.23333.23333.3	2.35e-07	R.AAAPTVVFLDELDSIAK[425.27]AR.G	YDL126C	2283.26	126.127	16136.7	127.13	4864.67	17459.7	3764.25	0.215597	4.63829
1	JL033021_040221_RPA2HFH_Q2_10to1_50B.23529.23529.4	2.23e-06	K.M[147.04]QYFLSTGNLVSQSGLDLQQVSGYTVVAEK[425.27]INFYR.F	YPR010C	4268.15	126.127	13797.8	127.13	5666.95	14916.6	4833.94	0.324065	3.0858
1	JL033021_040221_RPA2HFH_Q2_10to1_50B.23551.23551.4	0.00909	K.M[147.04]QYFLSTGNLVSQSGLDLQQVSGYTVVAEK[425.27]INFYR.F	YPR010C	4268.15	126.127	13467.8	127.13	6936.41	14548.2	6223.89	0.427812	2.33748
0.9989	JL033021_040221_RPA2HFH_Q2_10to1_50B.24315.24315.4	0.00412	R.EIFDGIIGNDVK[425.27]DSFLTDRLELLLR.G	YPR010C	3187.72	126.127	10732.5	127.13	4145.52	11604.9	3478.77	0.299768	3.33591
0.9651	JL033021_040221_RPA2HFH_Q2_10to1_50B.24658.24658.3	0.0742	R.LM[147.04]NAFVTIQNDVNAFIDSTK[425.27]AQGR.T	YOR341W	2965.5	126.127	17621.7	127.13	7836.04	19045.6	6815	0.357825	2.79466
1	JL033021_040221_RPA2HFH_Q2_10to1_50B.24679.24679.3	0.00143	R.LM[147.04]NAFVTIQNDVNAFIDSTK[425.27]AQGR.T	YOR341W	2965.5	126.127	18827.3	127.13	6968.6	20360.2	5777.24	0.283752	3.52421
1	JL033021_040221_RPA2HFH_Q2_10to1_50B.24920.24920.3	0.00516	K.FEEVSK[425.27]DLIAVYYSFGGLLM[147.04]R.L	YOR224C	2749.41	126.127	11631.1	127.13	5875.87	12565.2	5252.31	0.418005	2.39231
1	JL033021_040221_RPA2HFH_Q2_10to1_50B.24954.24954.3	3.99e-09	R.LM[147.04]NAFVTIQNDVNAFIDSTK[425.27]AQGR.T	YOR341W	2965.5	126.127	20454.1	127.13	9200.24	22106	8022.58	0.362913	2.75548
1	JL033021_040221_RPA2HFH_Q2_10to1_50B.24998.24998.4	1.07e-09	R.LM[147.04]NAFVTIQNDVNAFIDSTK[425.27]AQGR.T	YOR341W	2965.5	126.127	21591.7	127.13	6693.61	23360.4	5234.4	0.224072	4.46285
1	JL033021_040221_RPA2HFH_Q2_10to1_50B.25114.25114.3	5.63e-12	R.LM[147.04]NAFVTIQNDVNAFIDSTK[425.27]AQGR.T	YOR341W	2965.5	126.127	32421.9	127.13	11087.5	35069.2	8970.56	0.255796	3.90937
1	JL033021_040221_RPA2HFH_Q2_10to1_50B.25136.25136.4	4.51e-06	R.LM[147.04]NAFVTIQNDVNAFIDSTK[425.27]AQGR.T	YOR341W	2965.5	126.127	12029	127.13	4061.98	13011.6	3272.87	0.251535	3.97558
1	JL033021_040221_RPA2HFH_Q2_10to1_50B.25154.25154.3	2.81e-08	K.FEEVSK[425.27]DLIAVYYSFGGLLM[147.04]R.L	YOR224C	2749.41	126.127	13314.5	127.13	5939.06	14390.2	5168.9	0.359196	2.784
1	JL033021_040221_RPA2HFH_Q2_10to1_50B.25165.25165.3	7.57e-07	R.LM[147.04]NAFVTIQNDVNAFIDSTK[425.27]AQGR.T	YOR341W	2965.5	126.127	20735	127.13	7729.03	22422.8	6420.85	0.286354	3.49218
1	JL033021_040221_RPA2HFH_Q2_10to1_50B.25176.25176.3	9.2e-10	K.FEEVSK[425.27]DLIAVYYSFGGLLM[147.04]R.L	YOR224C	2749.41	126.127	11850.3	127.131	7217.34	12791.8	6670.14	0.52144	1.91776
1	JL033021_040221_RPA2HFH_Q2_10to1_50B.25282.25282.3	4.11e-08	K.FEEVSK[425.27]DLIAVYYSFGGLLM[147.04]R.L	YOR224C	2749.41	126.127	13715.6	127.13	7966.81	14808.5	7305.79	0.493351	2.02695
1	JL033021_040221_RPA2HFH_Q2_10to1_50B.30703.30703.4	0.00208	R.SLADDYDYVM[147.04]YGTAYK[425.27]FEEVSK[425.27]DLIAVYYSFGGLLM[147.04]R.L	YOR224C	4918.38	126.127	11045.8	127.13	7965.33	11913.2	7543.89	0.633236	1.57919
0.9997	JL033021_040221_RPA2HFH_Q2_10to1_50B.30719.30719.4	0.34	R.SLADDYDYVM[147.04]YGTAYK[425.27]FEEVSK[425.27]DLIAVYYSFGGLLM[147.04]R.L	YOR224C	4918.38	126.127	10742.7	127.13	8863.78	11577	8533.87	0.737138	1.3566
0.9999	JL033021_040221_RPA2HFH_Q2_10to1_D.05663.05663.3	0.00157	R.LQTDVANSSSNSK[425.27]R.L	YOR341W	1802.92	126.126	12339.7	127.13	2492.73	13361.5	1563.39	0.117008	8.54644
1	JL033021_040221_RPA2HFH_Q2_10to1_D.05748.05748.3	0.00192	R.K[425.27]VYPSESR.Q	YPR010C	1261.67	126.127	12292.9	127.13	3081.28	13305.8	2198.28	0.165212	6.05285
1	JL033021_040221_RPA2HFH_Q2_10to1_D.05792.05792.3	0.000528	R.LQTDVANSSSNSK[425.27]R.L	YOR341W	1802.92	126.127	14576.6	127.13	2370.23	15788.3	1231.32	0.0779892	12.8223
1	JL033021_040221_RPA2HFH_Q2_10to1_D.07139.07139.3	0.0222	R.LK[425.27]ESQLPR.L	YBR154C	1266.74	126.127	48036.8	127.13	13530.1	51982.9	10186.2	0.195954	5.10325
1	JL033021_040221_RPA2HFH_Q2_10to1_D.07411.07411.3	4.7e-06	R.AAM[147.04]NDK[425.27]DLTM[147.04]GQVGER.L	RPB1-msCTD,YDL140C	2063.97	126.127	3165.18	127.13	2689.96	3410.37	2598.36	0.761899	1.31251
0.9976	JL033021_040221_RPA2HFH_Q2_10to1_D.07711.07711.3	0.08	R.GK[425.27]NEIIQNAQR.D	RPB1-msCTD,YDL140C	1566.86	126.127	7576.73	127.131	2116.42	8199.29	1587.73	0.193642	5.16416
1	JL033021_040221_RPA2HFH_Q2_10to1_D.08548.08548.3	3.84e-07	R.K[425.27]M[147.04]M[147.04]SFQANPTEESISK.F	YBR154C	2156.02	126.127	5310.94	127.13	1404.66	5747.97	1028.43	0.178921	5.58905
1	JL033021_040221_RPA2HFH_Q2_10to1_D.08552.08552.3	3.59e-07	R.K[425.27]M[147.04]M[147.04]SFQANPTEESISK.F	YBR154C	2156.02	126.127	6572.56	127.13	1976.08	7111.45	1527.49	0.214793	4.65563
1	JL033021_040221_RPA2HFH_Q2_10to1_D.08592.08592.3	3.08e-06	R.K[425.27]M[147.04]M[147.04]SFQANPTEESISK.F	YBR154C	2156.02	126.127	8105.01	127.131	1473.96	8777.49	851.861	0.0970506	10.3039
0.988	JL033021_040221_RPA2HFH_Q2_10to1_D.08886.08886.3	0.07	R.ALM[147.04]QLK[425.27]YM[147.04]R.S	YOR341W	1481.78	126.127	21935.3	127.13	4803.3	23748.5	3177.94	0.133816	7.47293
1	JL033021_040221_RPA2HFH_Q2_10to1_D.09916.09916.3	1.41e-05	R.LIGDAAK[425.27]NQAALNPR.N	YDL229W,YNL209W	1848.03	126.127	18492.8	127.13	4429.59	20018.4	3086.52	0.154184	6.48574
1	JL033021_040221_RPA2HFH_Q2_10to1_D.10468.10468.3	0.0019	R.TPQIGDK[425.27]FSSR.H	YPR010C	1531.81	126.127	26323.7	127.13	5096.38	28505.3	3098.03	0.108683	9.2011
1	JL033021_040221_RPA2HFH_Q2_10to1_D.10499.10499.3	4.83e-06	R.TDILK[425.27]TSVDTGR.E	YOR341W	1601.87	126.127	25417.5	127.13	4376.08	27528.4	2407.52	0.0874559	11.4343
1	JL033021_040221_RPA2HFH_Q2_10to1_D.10519.10519.3	0.0127	R.TPQIGDK[425.27]FSSR.H	YPR010C	1531.81	126.127	34848.1	127.131	5627.09	37745.3	2901.48	0.0768701	13.009
1	JL033021_040221_RPA2HFH_Q2_10to1_D.12018.12018.3	0.000795	R.K[425.27]ALANQLLTPSSNVSTHTLNK.K	YOR341W	2533.39	126.126	9726.56	127.13	2295.17	10529.2	1586.28	0.150655	6.6377
0.9986	JL033021_040221_RPA2HFH_Q2_10to1_D.12029.12029.3	0.0309	R.K[425.27]ALANQLLTPSSNVSTHTLNK.K	YOR341W	2533.39	126.126	10190.2	127.129	2640.66	11029.2	1914.87	0.173618	5.75978
0.9986	JL033021_040221_RPA2HFH_Q2_10to1_D.13615.13615.3	0.0391	R.ITM[147.04]AALNPEAIDEENK[425.27]PSTLR.L	YML074C	2625.34	126.127	10081.4	127.13	2296.3	10914	1555.64	0.142536	7.01576
0.9999	JL033021_040221_RPA2HFH_Q2_10to1_D.13626.13626.3	0.0286	R.ITM[147.04]AALNPEAIDEENK[425.27]PSTLR.L	YML074C	2625.34	126.127	8712.64	127.13	2374.81	9429.02	1762.65	0.186939	5.34935
1	JL033021_040221_RPA2HFH_Q2_10to1_D.13832.13832.3	6.6e-08	R.NTYQSAM[147.04]GK[425.27]QAM[147.04]GVFLTNYNVR.M	YOR151C	2821.36	126.127	8005.81	127.13	4354.11	8646.17	3947.08	0.456512	2.19052
1	JL033021_040221_RPA2HFH_Q2_10to1_D.14296.14296.4	7.74e-05	R.LVK[425.27]ALEDIM[147.04]VHYDNTTR.N	RPB1-msCTD,YDL140C	2330.2	126.127	10318.4	127.13	3941.47	11157.5	3297.3	0.295524	3.38382
1	JL033021_040221_RPA2HFH_Q2_10to1_D.14339.14339.4	3.02e-06	R.LVK[425.27]ALEDIM[147.04]VHYDNTTR.N	RPB1-msCTD,YDL140C	2330.2	126.127	12127.8	127.13	4484.96	13115.2	3717.26	0.28343	3.5282
1	JL033021_040221_RPA2HFH_Q2_10to1_D.14365.14365.4	0.00255	R.LVK[425.27]ALEDIM[147.04]VHYDNTTR.N	RPB1-msCTD,YDL140C	2330.2	126.127	12077.4	127.13	4203.78	13062.9	3420.47	0.261846	3.81904
1	JL033021_040221_RPA2HFH_Q2_10to1_D.14429.14429.4	1.28e-05	R.LVK[425.27]ALEDIM[147.04]VHYDNTTR.N	RPB1-msCTD,YDL140C	2330.2	126.127	9048.28	127.13	5524.9	9767.05	5108.09	0.522993	1.91207
1	JL033021_040221_RPA2HFH_Q2_10to1_D.14449.14449.3	0.00039	K.LSVSVEQVSIAK[425.27]PM[147.04]SNDGVSSAVER.K	YPR010C	2901.48	126.127	8452.83	127.13	1843.29	9151.64	1216.4	0.132916	7.52354
1	JL033021_040221_RPA2HFH_Q2_10to1_D.14456.14456.4	8.43e-05	R.LVK[425.27]ALEDIM[147.04]VHYDNTTR.N	RPB1-msCTD,YDL140C	2330.2	126.127	9717.75	127.13	3765.83	10507.6	3163	0.301021	3.32202
1	JL033021_040221_RPA2HFH_Q2_10to1_D.14468.14468.4	4.85e-06	R.LVK[425.27]ALEDIM[147.04]VHYDNTTR.N	RPB1-msCTD,YDL140C	2330.2	126.127	10220	127.13	3841.92	11051.6	3199.45	0.289501	3.45422
1	JL033021_040221_RPA2HFH_Q2_10to1_D.14793.14793.3	0.000197	R.EAAAEVTNLDK[407.26]DTPADDPELLKR.L	YOR341W	2789.42	126.127	11298.4	127.13	2547.18	12231.8	1715.23	0.140227	7.13128
0.9999	JL033021_040221_RPA2HFH_Q2_10to1_D.14847.14847.3	0.0363	R.M[147.04]DTM[147.04]ANILYYPQK[425.27]PLGTTR.A	YOR151C	2541.27	126.127	10782.8	127.13	5997.97	11644.2	5459.32	0.468845	2.1329
1	JL033021_040221_RPA2HFH_Q2_10to1_D.14858.14858.3	0.000368	R.M[147.04]DTM[147.04]ANILYYPQK[425.27]PLGTTR.A	YOR151C	2541.27	126.127	10988	127.13	5686.5	11869.3	5107.12	0.430279	2.32407
1	JL033021_040221_RPA2HFH_Q2_10to1_D.15013.15013.4	5.98e-06	R.K[425.27]EQC[160.03]VLQYVFHSRPNLSR.K	YOR341W	2557.33	126.127	10286	127.131	2283.41	11136	1523.46	0.136805	7.3097
1	JL033021_040221_RPA2HFH_Q2_10to1_D.15058.15058.3	0.00215	R.LGEHNIDVLEGNEQFINAAK[425.27].L	TRYP_PIG	2507.27	126.127	7855.69	127.13	1898.79	8503.6	1329.48	0.156344	6.39617
1	JL033021_040221_RPA2HFH_Q2_10to1_D.15449.15449.3	1.63e-06	K.VIFDGK[425.27]PLNSEDEISNSGYLGNK.L	YPR010C	2792.39	126.127	8894.55	127.131	2165.54	9628.02	1522.06	0.158087	6.32563
0.9999	JL033021_040221_RPA2HFH_Q2_10to1_D.15451.15451.3	0.00574	K.VIFDGK[425.27]PLNSEDEISNSGYLGNK.L	YPR010C	2792.39	126.127	9935.47	127.131	2118.61	10757.3	1378.33	0.12813	7.80458
1	JL033021_040221_RPA2HFH_Q2_10to1_D.15462.15462.3	1.61e-09	K.VIFDGK[425.27]PLNSEDEISNSGYLGNK.L	YPR010C	2792.39	126.127	10437	127.13	2151.94	11300.9	1369.02	0.121142	8.25474
1	JL033021_040221_RPA2HFH_Q2_10to1_D.15488.15488.3	0.00027	R.VSGEDVIIGK[425.27]TTPISPDEEELGQR.T	YOR151C	2865.47	126.127	5871.48	127.13	3307.01	6340.18	3016.63	0.475796	2.10174
1	JL033021_040221_RPA2HFH_Q2_10to1_D.16353.16353.3	0.00272	K.LDK[425.27]SQVDEIVLVGGSTR.L	YAL005C,YLL024C	2112.15	126.127	12223.5	127.131	2906.02	13232	2016.7	0.152411	6.56122
1	JL033021_040221_RPA2HFH_Q2_10to1_D.16534.16534.3	0.0024	R.GSFFAQLK[425.27]TTTVR.K	YPR010C	1751.97	126.127	21517.3	127.13	4676.09	23296.3	3079.15	0.132173	7.56583
0.9989	JL033021_040221_RPA2HFH_Q2_10to1_D.16540.16540.4	0.0272	R.DAK[425.27]LDK[425.27]SQVDEIVLVGGSTR.L	YAL005C,YLL024C	2723.49	126.127	8859.09	127.13	3906.75	9575.21	3391.1	0.354154	2.82363
0.9543	JL033021_040221_RPA2HFH_Q2_10to1_D.16772.16772.3	0.331	R.NLNNLK[425.27]QENAYLLIR.R	YOR224C	2112.18	126.127	11369.9	127.13	4473.78	12293.5	3773.31	0.306936	3.258
1	JL033021_040221_RPA2HFH_Q2_10to1_D.17080.17080.4	0.000451	R.SAIEHTTLK[425.27]SVTIASEIYYDPDPR.S	RPB1-msCTD,YDL140C	3002.53	126.127	5295.79	127.13	2324.14	5723.97	2015.09	0.352044	2.84056
0.9999	JL033021_040221_RPA2HFH_Q2_10to1_D.17084.17084.4	0.00121	R.SAIEHTTLK[425.27]SVTIASEIYYDPDPR.S	RPB1-msCTD,YDL140C	3002.53	126.127	5056.7	127.131	2251.92	5465.27	1959.16	0.358474	2.7896
1	JL033021_040221_RPA2HFH_Q2_10to1_D.17118.17118.4	3.15e-05	R.SAIEHTTLK[425.27]SVTIASEIYYDPDPR.S	RPB1-msCTD,YDL140C	3002.53	126.127	6383.62	127.13	2930.17	6898.7	2566.84	0.372076	2.68762
1	JL033021_040221_RPA2HFH_Q2_10to1_D.17138.17138.4	0.000465	R.SAIEHTTLK[425.27]SVTIASEIYYDPDPR.S	RPB1-msCTD,YDL140C	3002.53	126.127	5254.82	127.131	2397.52	5678.93	2097.4	0.369331	2.7076
1	JL033021_040221_RPA2HFH_Q2_10to1_D.17193.17193.3	0.00236	R.SAIEHTTLK[425.27]SVTIASEIYYDPDPR.S	RPB1-msCTD,YDL140C	3002.53	126.127	4429.82	127.13	2892.93	4780.16	2702.34	0.565324	1.7689
1	JL033021_040221_RPA2HFH_Q2_10to1_D.17202.17202.3	3.99e-05	R.SAIEHTTLK[425.27]SVTIASEIYYDPDPR.S	RPB1-msCTD,YDL140C	3002.53	126.127	4844.89	127.13	3483.48	5225.43	3297.89	0.631124	1.58448
1	JL033021_040221_RPA2HFH_Q2_10to1_D.17302.17302.4	2.35e-11	R.SAIEHTTLK[425.27]SVTIASEIYYDPDPR.S	RPB1-msCTD,YDL140C	3002.53	126.127	5926.18	127.131	3703.56	6396.23	3436.66	0.537294	1.86118
0.9934	JL033021_040221_RPA2HFH_Q2_10to1_D.17316.17316.3	0.175	R.SAIEHTTLK[425.27]SVTIASEIYYDPDPR.S	RPB1-msCTD,YDL140C	3002.53	126.127	4771.09	127.13	2103.58	5156.76	1825.84	0.354068	2.82432
1	JL033021_040221_RPA2HFH_Q2_10to1_D.17366.17366.4	1.34e-06	R.SAIEHTTLK[425.27]SVTIASEIYYDPDPR.S	RPB1-msCTD,YDL140C	3002.53	126.127	5147.18	127.13	2834.58	5558.59	2575.41	0.46332	2.15833
1	JL033021_040221_RPA2HFH_Q2_10to1_D.17419.17419.4	0.000307	R.SAIEHTTLK[425.27]SVTIASEIYYDPDPR.S	RPB1-msCTD,YDL140C	3002.53	126.127	5624.18	127.13	1627.77	6085.83	1239.39	0.203652	4.91033
1	JL033021_040221_RPA2HFH_Q2_10to1_D.17444.17444.4	0.00252	R.SAIEHTTLK[425.27]SVTIASEIYYDPDPR.S	RPB1-msCTD,YDL140C	3002.53	126.127	6390.66	127.131	2796	6907.43	2422.43	0.350699	2.85145
1	JL033021_040221_RPA2HFH_Q2_10to1_D.17503.17503.4	6.13e-07	R.SAIEHTTLK[425.27]SVTIASEIYYDPDPR.S	RPB1-msCTD,YDL140C	3002.53	126.127	5531.73	127.13	2576.83	5977.76	2264.68	0.378851	2.63956
1	JL033021_040221_RPA2HFH_Q2_10to1_D.17520.17520.4	0.00355	R.SAIEHTTLK[425.27]SVTIASEIYYDPDPR.S	RPB1-msCTD,YDL140C	3002.53	126.127	5946.57	127.13	2272.73	6430.14	1901.57	0.295728	3.38148
1	JL033021_040221_RPA2HFH_Q2_10to1_D.17546.17546.4	0.00118	R.SAIEHTTLK[425.27]SVTIASEIYYDPDPR.S	RPB1-msCTD,YDL140C	3002.53	126.127	4986.25	127.13	1401.58	5395.89	1054.28	0.195385	5.11809
1	JL033021_040221_RPA2HFH_Q2_10to1_D.17550.17550.3	0.00134	R.EGLIDTAVK[425.27]TAETGYIQR.R	RPB1-msCTD,YDL140C	2261.2	126.127	8441.1	127.13	4807.82	9114.49	4394.19	0.48211	2.07421
1	JL033021_040221_RPA2HFH_Q2_10to1_D.17560.17560.3	2.8e-05	R.EGLIDTAVK[425.27]TAETGYIQR.R	RPB1-msCTD,YDL140C	2261.2	126.127	9960.92	127.13	7941.1	10736.9	7615.32	0.709269	1.4099
1	JL033021_040221_RPA2HFH_Q2_10to1_D.17570.17570.3	2.55e-06	R.EGLIDTAVK[425.27]TAETGYIQR.R	RPB1-msCTD,YDL140C	2261.2	126.127	14380.9	127.13	12841.6	15489.8	12469.8	0.805035	1.24218
1	JL033021_040221_RPA2HFH_Q2_10to1_D.17669.17669.3	2.62e-07	R.EGLIDTAVK[425.27]TAETGYIQR.R	RPB1-msCTD,YDL140C	2261.2	126.127	12337.5	127.13	10432.2	13293.7	10071.4	0.757607	1.31994
1	JL033021_040221_RPA2HFH_Q2_10to1_D.17675.17675.3	1.77e-06	R.EGLIDTAVK[425.27]TAETGYIQR.R	RPB1-msCTD,YDL140C	2261.2	126.127	13257.1	127.13	10901.9	14287	10492.1	0.734383	1.36169
0.9988	JL033021_040221_RPA2HFH_Q2_10to1_D.17684.17684.3	0.00498	K.RAHGNQIM[147.04]EK[425.27]LC[160.03]EQQVPAQNR.M	DECOY_YOR377W_UNMAPPED	2819.4	126.127	5149.61	127.13	1136.12	5575.23	755.149	0.135447	7.38295
0.9993	JL033021_040221_RPA2HFH_Q2_10to1_D.17742.17742.4	0.017	R.SAIEHTTLK[425.27]SVTIASEIYYDPDPR.S	RPB1-msCTD,YDL140C	3002.53	126.127	6974.8	127.13	2329.47	7544.75	1870.07	0.247864	4.03448
0.9943	JL033021_040221_RPA2HFH_Q2_10to1_D.17817.17817.3	0.229	R.SEYVDM[147.04]AIAK[425.27]ALSDGR.T	YOR341W	2038.01	126.127	11447.4	127.13	2044.77	12397.5	1163.48	0.0938479	10.6555
0.9957	JL033021_040221_RPA2HFH_Q2_10to1_D.17986.17986.4	0.0108	R.ELK[425.27]YELIAEESEDDSESGK[425.27]VFIGR.L	YOR151C	3336.68	126.127	4926.14	127.13	2214.31	5323.99	1930.58	0.362619	2.75772
1	JL033021_040221_RPA2HFH_Q2_10to1_D.18055.18055.3	1.56e-08	R.K[425.27]VFQM[147.04]NYFSDGLFAEDEYQR.Y	YGL244W	2799.29	126.127	4962.53	127.13	2141.26	5364.07	1849.03	0.344708	2.90101
1	JL033021_040221_RPA2HFH_Q2_10to1_D.18058.18058.3	1.28e-07	R.K[425.27]VFQM[147.04]NYFSDGLFAEDEYQR.Y	YGL244W	2799.29	126.127	4880.2	127.13	1704.12	5278.38	1388	0.262959	3.80287
1	JL033021_040221_RPA2HFH_Q2_10to1_D.18104.18104.3	1.88e-11	R.K[425.27]VFQM[147.04]NYFSDGLFAEDEYQR.Y	YGL244W	2799.29	126.127	4967.34	127.13	2714.01	5364.56	2462.35	0.459003	2.17864
1	JL033021_040221_RPA2HFH_Q2_10to1_D.18176.18176.3	4.15e-05	R.TQVLQYLGDK[425.27]FR.V	YPR010C	1763.97	126.128	84806.8	127.131	14953.6	91847.1	8410.68	0.0915726	10.9203
1	JL033021_040221_RPA2HFH_Q2_10to1_D.18180.18180.4	2.9e-05	K.IK[425.27]LLTQATSEDGTSASFQIVEEDHTLGNALR.Y	YNL113W	3640.87	126.127	3009.75	127.13	1046.15	3255.35	850.845	0.261368	3.82603
1	JL033021_040221_RPA2HFH_Q2_10to1_D.18321.18321.3	4.98e-08	K.SQFSNLK[425.27]VVTTTADDAFPSSLR.A	YJR063W	2680.38	126.127	5634.84	127.13	1547.63	6098.06	1152.55	0.189003	5.29092
1	JL033021_040221_RPA2HFH_Q2_10to1_D.18401.18401.3	3.21e-12	K.SQFSNLK[425.27]VVTTTADDAFPSSLR.A	YJR063W	2680.38	126.127	7973.26	127.13	1808.2	8631.85	1221.85	0.141552	7.06456
0.9809	JL033021_040221_RPA2HFH_Q2_10to1_D.18846.18846.3	0.466	R.IDTSVK[425.27]APQALM[147.04]LAPTR.E	YJL138C,YKR059W	2124.17	126.127	5998.35	127.131	1044.65	6496.41	580.94	0.0894247	11.1826
0.9832	JL033021_040221_RPA2HFH_Q2_10to1_D.18995.18995.3	4.06e-10	R.SLADDYDYVM[147.04]YGTAYK[425.27]FEEVSK.D	YOR224C	2906.33	126.127	9146.42	127.13	3932.45	9886.6	3392.84	0.343176	2.91396
1	JL033021_040221_RPA2HFH_Q2_10to1_D.19019.19019.3	0.00113	R.K[425.27]NEYLVPVVM[147.04]ILK.A	YPR010C	1858.07	126.127	8853.23	127.13	1370.9	9589.76	674.253	0.0703097	14.2228
0.9958	JL033021_040221_RPA2HFH_Q2_10to1_D.19310.19310.4	0.0269	R.EASK[425.27]DNVDFILSNVDLAM[147.04]ANSLRR.V	YIL021W	2990.52	126.127	5166.78	127.13	1642.18	5589.68	1295.9	0.231837	4.31337
1	JL033021_040221_RPA2HFH_Q2_10to1_D.19345.19345.3	5.91e-06	K.VEGK[425.27]TPGLPIDLEIGYVPPSTR.G	YPR010C	2634.43	126.127	6673.65	127.131	1747.96	7222.96	1273.97	0.176377	5.66967
1	JL033021_040221_RPA2HFH_Q2_10to1_D.19361.19361.3	3.8e-08	K.VEGK[425.27]TPGLPIDLEIGYVPPSTR.G	YPR010C	2634.43	126.127	6304.27	127.13	2013.98	6820.18	1592.19	0.233453	4.28352
1	JL033021_040221_RPA2HFH_Q2_10to1_D.19386.19386.4	4.42e-06	R.EASK[425.27]DNVDFILSNVDLAM[147.04]ANSLRR.V	YIL021W	2990.52	126.127	6287.83	127.13	3870.97	6787.05	3583.59	0.528003	1.89393
1	JL033021_040221_RPA2HFH_Q2_10to1_D.19392.19392.4	4.45e-06	R.EASK[425.27]DNVDFILSNVDLAM[147.04]ANSLRR.V	YIL021W	2990.52	126.127	6075.6	127.131	3911.48	6556.56	3646.04	0.556091	1.79827
0.9577	JL033021_040221_RPA2HFH_Q2_10to1_D.19466.19466.3	0.437	R.LLPQINILQPIK[425.27]GESAR.R	YPR110C	2186.29	126.127	18790.7	127.13	4132.44	20343.8	2741.35	0.134751	7.42109
1	JL033021_040221_RPA2HFH_Q2_10to1_D.20634.20634.3	4.46e-05	R.EASK[425.27]DNVDFILSNVDLAM[147.04]ANSLR.R	YIL021W	2834.42	126.127	4449.9	127.13	1973.72	4809.51	1715.52	0.356694	2.80352
1	JL033021_040221_RPA2HFH_Q2_10to1_D.20790.20790.3	2.58e-06	R.EASK[425.27]DNVDFILSNVDLAM[147.04]ANSLR.R	YIL021W	2834.42	126.127	4070.12	127.13	2540.69	4392.98	2357.18	0.536578	1.86366
1	JL033021_040221_RPA2HFH_Q2_10to1_D.20895.20895.3	0.00072	R.AALYK[425.27]EVYNVIASDGSYVNYR.H	RPB1-msCTD,YDL140C	2691.36	126.127	4022.21	127.13	3014.7	4337.12	2869.41	0.661593	1.5115
1	JL033021_040221_RPA2HFH_Q2_10to1_D.20900.20900.3	9.92e-07	R.AALYK[425.27]EVYNVIASDGSYVNYR.H	RPB1-msCTD,YDL140C	2691.36	126.127	4527.31	127.13	3068.82	4884.44	2882.06	0.59005	1.69477
0.9973	JL033021_040221_RPA2HFH_Q2_10to1_D.20906.20906.3	0.0135	R.AALYK[425.27]EVYNVIASDGSYVNYR.H	RPB1-msCTD,YDL140C	2691.36	126.127	3926.43	127.13	2236.91	4239.66	2044.54	0.482241	2.07365
1	JL033021_040221_RPA2HFH_Q2_10to1_D.21218.21218.3	7.37e-05	R.AALYK[425.27]EVYNVIASDGSYVNYR.H	RPB1-msCTD,YDL140C	2691.36	126.127	4522.41	127.13	2576.65	4883.18	2355.1	0.482288	2.07345
1	JL033021_040221_RPA2HFH_Q2_10to1_D.21225.21225.3	2.15e-08	R.AALYK[425.27]EVYNVIASDGSYVNYR.H	RPB1-msCTD,YDL140C	2691.36	126.127	4408.77	127.13	2329.11	4761.98	2100.04	0.441001	2.26757
1	JL033021_040221_RPA2HFH_Q2_10to1_D.21402.21402.3	2.61e-13	R.AALYK[425.27]EVYNVIASDGSYVNYR.H	RPB1-msCTD,YDL140C	2691.36	126.126	6438.08	127.13	6826.5	6925.64	6737.18	0.972789	1.02797
1	JL033021_040221_RPA2HFH_Q2_10to1_D.21467.21467.3	1.39e-07	R.AALYK[425.27]EVYNVIASDGSYVNYR.H	RPB1-msCTD,YDL140C	2691.36	126.127	4664.5	127.13	3134.82	5032.67	2940.47	0.584276	1.71152
0.9922	JL033021_040221_RPA2HFH_Q2_10to1_D.21648.21648.3	1.72e-10	R.K[407.26]LVKADSFFM[147.04]DVLVVPPTR.F	YOR341W	2456.36	126.127	7289.27	127.13	1286.21	7894.39	723.904	0.0916985	10.9053
1	JL033021_040221_RPA2HFH_Q2_10to1_D.21694.21694.3	3.82e-05	K.VTK[425.27]TIAQDSFDILSFDDSNTLIR.K	YBL017C	2895.49	126.127	3398.2	127.13	1753.22	3670.79	1573.65	0.428696	2.33265
0.9888	JL033021_040221_RPA2HFH_Q2_10to1_D.21774.21774.3	0.00472	K.VVGDK[425.27]WESYLNLLQEDELDEGTALSR.L	YOR210W	3275.63	126.126	2647.44	127.131	922.85	2863.46	751.241	0.262355	3.81164
1	JL033021_040221_RPA2HFH_Q2_10to1_D.24547.24547.3	4.74e-06	K.VLLSEVIDK[425.27]VIVTETTGTSNTAGGNAAR.S	YOR341W	3112.67	126.127	3130.16	127.131	1715.13	3380.43	1556.9	0.460562	2.17126
1	JL033021_040221_RPA2HFH_Q2_10to1_D.24553.24553.3	9.66e-07	K.VLLSEVIDK[425.27]VIVTETTGTSNTAGGNAAR.S	YOR341W	3112.67	126.127	3898.54	127.13	2447.51	4207.67	2272.73	0.540139	1.85138
1	JL033021_040221_RPA2HFH_Q2_10to1_D.24586.24586.4	2.76e-06	K.VLLSEVIDK[425.27]VIVTETTGTSNTAGGNAAR.S	YOR341W	3112.67	126.127	3632.42	127.131	1195.65	3929.39	955.149	0.243078	4.1139
1	JL033021_040221_RPA2HFH_Q2_10to1_D.32609.32609.4	0.000708	R.SLADDYDYVM[147.04]YGTAYK[425.27]FEEVSK[425.27]DLIAVYYSFGGLLM[147.04]R.L	YOR224C	4918.38	126.127	5953.38	127.13	6629.85	6401.62	6569.97	1.0263	0.974376
1	JL033021_040221_RPA2HFH_Q2_1to10_100B.02745.02745.3	2.36e-05	K.VEGK[425.27]TPGLPIDLEIGYVPPSTR.G	YPR010C	2634.43	126.127	10829.7	127.131	43061.4	11389.5	45171.6	3.96607	0.252139
1	JL033021_040221_RPA2HFH_Q2_1to10_100B.02815.02815.3	0.000129	R.LM[147.04]NAFVTIQNDVNAFIDSTK[425.27]AQGR.T	YOR341W	2965.5	126.127	14121.8	127.13	70565.6	14733	74349	5.04642	0.19816
1	JL033021_040221_RPA2HFH_Q2_1to10_100B.02816.02816.4	4.72e-05	R.LM[147.04]NAFVTIQNDVNAFIDSTK[425.27]AQGR.T	YOR341W	2965.5	126.127	8139.1	127.13	37169.9	8520.25	39099.9	4.58905	0.21791
1	JL033021_040221_RPA2HFH_Q2_1to10_100B.04618.04618.3	0.000268	R.VVTK[425.27]AM[147.04]SSR.-	YDL229W,YNL209W	1290.7	126.127	6279.35	127.13	36395.6	6509.79	38437.2	5.90452	0.169362
1	JL033021_040221_RPA2HFH_Q2_1to10_100B.04958.04958.3	0.00565	R.NPDAPK[425.27]GSTDPK.E	YPR110C	1522.77	126.127	2433.81	127.131	16321.6	2504.87	17271.4	6.89513	0.14503
1	JL033021_040221_RPA2HFH_Q2_1to10_100B.05250.05250.3	1.18e-05	R.K[425.27]QNSPTTYGASR.R	YOR123C	1605.82	126.127	1621.29	127.13	12214.2	1657.57	12943	7.80841	0.128067
0.9643	JL033021_040221_RPA2HFH_Q2_1to10_100B.05440.05440.3	0.106	R.K[425.27]QIENADLPPK.K	YNL084C	1548.86	126.127	4119.71	127.13	22642.6	4281.08	23893.6	5.58121	0.179173
0.9893	JL033021_040221_RPA2HFH_Q2_1to10_100B.05514.05514.3	0.136	R.NLSDEK[425.27]NDSR.S	YDR365W-A,YDR365W-B,YER137C-A,YER138C,YGR027W-A,YGR027W-B,YJR026W,YJR027W,YLR157C-A,YLR157C-B,YLR227W-A,YLR227W-B,YLR256W-A,YML039W,YML040W,YOL103W-A,YOL103W-B,YPL257W-A,YPL257W-B,YPR158C-C,YPR158C-D	1473.71	126.127	4251	127.13	22083.2	4428.07	23282.3	5.25789	0.19019
1	JL033021_040221_RPA2HFH_Q2_1to10_100B.05610.05610.3	0.000148	R.K[425.27]VYPSESR.Q	YPR010C	1261.67	126.127	7167.49	127.13	48474.6	7373.4	51301	6.95758	0.143728
1	JL033021_040221_RPA2HFH_Q2_1to10_100B.05659.05659.3	5.99e-05	R.TGQIK[425.27]TGAPAR.S	YGR254W,YHR174W	1395.79	126.127	6468.9	127.13	38087.2	6701.41	40232.8	6.00363	0.166566
0.9999	JL033021_040221_RPA2HFH_Q2_1to10_100B.05719.05719.3	0.000506	R.LQTDVANSSSNSK[425.27]R.L	YOR341W	1802.92	126.126	4048.61	127.129	29084.6	4150.88	30803.1	7.42087	0.134755
1	JL033021_040221_RPA2HFH_Q2_1to10_100B.05762.05762.3	0.000286	R.K[425.27]VYPSESR.Q	YPR010C	1261.67	126.127	15610.8	127.13	102742	16082.6	108695	6.75857	0.14796
0.9999	JL033021_040221_RPA2HFH_Q2_1to10_100B.05859.05859.3	0.14	R.K[425.27]LNM[147.04]SNIR.N	YGL244W	1287.7	126.127	8667.5	127.13	52566.7	8966.39	55551.4	6.19552	0.161407
1	JL033021_040221_RPA2HFH_Q2_1to10_100B.05861.05861.3	1.17e-06	R.LQTDVANSSSNSK[425.27]R.L	YOR341W	1802.92	126.127	11880.3	127.131	89988.1	12142.2	95363.1	7.85387	0.127326
1	JL033021_040221_RPA2HFH_Q2_1to10_100B.05868.05868.3	9.04e-05	R.K[425.27]TDEPVADAER.S	YNL124W	1526.77	126.127	2932.24	127.13	21863	2999.73	23164.7	7.72227	0.129496
1	JL033021_040221_RPA2HFH_Q2_1to10_100B.05898.05898.3	0.000199	R.LQTDVANSSSNSK[425.27]R.L	YOR341W	1802.92	126.127	11763.3	127.13	86298.6	12045.7	91420	7.58941	0.131762
1	JL033021_040221_RPA2HFH_Q2_1to10_100B.05904.05904.3	0.000211	R.K[425.27]VYPSESR.Q	YPR010C	1261.67	126.127	10227.2	127.13	72123.5	10496.6	76368.1	7.27551	0.137447
1	JL033021_040221_RPA2HFH_Q2_1to10_100B.05994.05994.3	0.000547	R.NPSTK[425.27]EANIR.D	YBR279W	1425.77	126.127	7219.09	127.131	34954.2	7540.79	36808.2	4.88122	0.204867
1	JL033021_040221_RPA2HFH_Q2_1to10_100B.06045.06045.3	0.000116	R.LQTDVANSSSNSK[425.27]R.L	YOR341W	1802.92	126.127	4027.18	127.131	28989.4	4128.42	30702.9	7.43697	0.134463
1	JL033021_040221_RPA2HFH_Q2_1to10_100B.06473.06473.3	0.00256	K.VIK[425.27]PPGQAR.T	YPR010C	1261.76	126.127	23651	127.13	130070	24576.7	137258	5.58488	0.179055
1	JL033021_040221_RPA2HFH_Q2_1to10_100B.06505.06505.3	0.0527	R.LK[425.27]SVEVHR.Y	YOR341W	1263.74	126.127	22526.3	127.13	127207	23380.6	134290	5.74367	0.174105
1	JL033021_040221_RPA2HFH_Q2_1to10_100B.06681.06681.3	0.00201	R.LK[425.27]SVEVHR.Y	YOR341W	1263.74	126.127	30570.1	127.13	160756	31827.4	169519	5.3262	0.187751
0.9925	JL033021_040221_RPA2HFH_Q2_1to10_100B.06710.06710.3	0.046	R.SQIM[147.04]QK[425.27]YQER.K	YGL244W	1622.82	126.127	9614.95	127.13	55405.4	9970.47	58508.2	5.86815	0.170411
0.967	JL033021_040221_RPA2HFH_Q2_1to10_100B.06731.06731.3	0.00187	K.LVHEFHK[425.27]K.L	YOR341W	1333.76	126.127	23980.8	127.13	137367	24874.3	145047	5.8312	0.171491
1	JL033021_040221_RPA2HFH_Q2_1to10_100B.06798.06798.4	0.0197	R.GSK[425.27]LPPGHK[425.27]GAHGR.L	YLR418C	1992.12	126.127	8631.19	127.13	44843.2	8990.67	47278.3	5.25859	0.190165
0.9999	JL033021_040221_RPA2HFH_Q2_1to10_100B.06824.06824.3	0.025	R.EGK[425.27]TDYYQR.K	YPL131W	1455.71	126.127	11178.2	127.13	61320	11617	64705.9	5.56994	0.179535
0.9946	JL033021_040221_RPA2HFH_Q2_1to10_100B.06854.06854.3	0.119	R.EGK[425.27]TDYYQR.K	YPL131W	1455.71	126.127	11054.6	127.13	59418.5	11498.7	62679.3	5.451	0.183453
1	JL033021_040221_RPA2HFH_Q2_1to10_100B.06869.06869.3	7.14e-05	R.EGK[425.27]TDYYQR.K	YPL131W	1455.71	126.127	11653.4	127.13	59595.4	12146.5	62815.2	5.17146	0.193369
1	JL033021_040221_RPA2HFH_Q2_1to10_100B.06893.06893.3	0.000126	K.SIVEANNNM[147.04]NK[425.27]VQR.D	YOR341W	1928.98	126.127	4256.42	127.13	22339.6	4431.84	23556.6	5.31531	0.188136
0.9983	JL033021_040221_RPA2HFH_Q2_1to10_100B.06933.06933.3	0.0733	R.GQK[425.27]LASNIK.L	YGL009C	1254.74	126.126	17878.8	127.129	109980	18482.5	116248	6.2896	0.158993
0.995	JL033021_040221_RPA2HFH_Q2_1to10_100B.06965.06965.4	0.125	R.GSK[425.27]LPPGHK[425.27]GAHGR.L	YLR418C	1992.12	126.127	7589.47	127.13	45273.5	7857.4	47833	6.08763	0.164267
0.9826	JL033021_040221_RPA2HFH_Q2_1to10_100B.07402.07402.3	0.00635	K.K[425.27]RYPHLQNR.T	YPR010C	1507.85	126.127	14846.4	127.13	107871	15211.3	114260	7.51151	0.133129
1	JL033021_040221_RPA2HFH_Q2_1to10_100B.07411.07411.3	0.024	R.LK[425.27]ESQLPR.L	YBR154C	1266.74	126.127	20107.3	127.13	123750	20785.8	130803	6.29292	0.158909
1	JL033021_040221_RPA2HFH_Q2_1to10_100B.07474.07474.3	8.06e-06	R.LM[147.04]K[425.27]SAIGEGM[147.04]TR.K	YBR127C	1621.82	126.127	7607.75	127.13	48317.8	7852.14	51093.5	6.50695	0.153682
0.9913	JL033021_040221_RPA2HFH_Q2_1to10_100B.07575.07575.3	0.0247	K.K[425.27]RYPHLQNR.T	YPR010C	1507.85	126.127	23003.5	127.13	157446	23648.9	166652	7.04691	0.141906
1	JL033021_040221_RPA2HFH_Q2_1to10_100B.07589.07589.3	0.0498	R.LK[425.27]ESQLPR.L	YBR154C	1266.74	126.127	21243.9	127.13	111864	22116.4	117964	5.3338	0.187483
1	JL033021_040221_RPA2HFH_Q2_1to10_100B.07608.07608.3	0.00555	R.LK[425.27]ESQLPR.L	YBR154C	1266.74	126.127	19020.4	127.13	112003	19703.9	118312	6.00452	0.166541
1	JL033021_040221_RPA2HFH_Q2_1to10_100B.07788.07788.3	6.22e-05	R.NAAYQK[425.27]EYETAER.N	YGL076C,YPL198W	1868.9	126.127	5617.18	127.13	36555.2	5790.37	38667.6	6.67791	0.149747
1	JL033021_040221_RPA2HFH_Q2_1to10_100B.07822.07822.3	1.28e-07	R.AAM[147.04]NDK[425.27]DLTM[147.04]GQVGER.L	RPB1-msCTD,YDL140C	2063.97	126.127	4975.75	127.13	26931.6	5174.08	28412.7	5.49136	0.182104
0.9602	JL033021_040221_RPA2HFH_Q2_1to10_100B.07840.07840.5	2.69	R.STGPVNSLTM[147.04]QPVK[425.27]GRKR.H	YPR010C	2268.25	126.127	16977.5	127.13	102316	17568.3	108116	6.15402	0.162496
0.9577	JL033021_040221_RPA2HFH_Q2_1to10_100B.07876.07876.6	0.896	R.GVAM[147.04]NPVDHPHGGGNHQHIGK[425.27]ASTISR.G	YFR031C-A,YIL018W	3086.53	126.127	12506.7	127.13	67120.4	13009.9	70802.2	5.44217	0.18375
1	JL033021_040221_RPA2HFH_Q2_1to10_100B.07940.07940.4	0.0251	R.GVAM[147.04]NPVDHPHGGGNHQHIGK[425.27]ASTISR.G	YFR031C-A,YIL018W	3086.53	126.127	2582.73	127.13	13431.7	2690.18	14161.3	5.26407	0.189967
1	JL033021_040221_RPA2HFH_Q2_1to10_100B.07960.07960.4	0.00765	R.GVAM[147.04]NPVDHPHGGGNHQHIGK[425.27]ASTISR.G	YFR031C-A,YIL018W	3086.53	126.127	2499.28	127.13	16158.8	2577.21	17091.1	6.63164	0.150792
0.9992	JL033021_040221_RPA2HFH_Q2_1to10_100B.07969.07969.3	0.0574	R.ATTPYM[147.04]TK[425.27]YER.A	YPR187W	1672.82	126.127	14739.6	127.13	87792.6	15261.1	92753.7	6.0778	0.164533
1	JL033021_040221_RPA2HFH_Q2_1to10_100B.07995.07995.5	8.04e-08	R.GVAM[147.04]NPVDHPHGGGNHQHIGK[425.27]ASTISR.G	YFR031C-A,YIL018W	3086.53	126.127	12926.1	127.13	78278.7	13372.8	82721.6	6.18582	0.16166
0.9948	JL033021_040221_RPA2HFH_Q2_1to10_100B.07999.07999.4	0.324	R.HIK[407.26]NRDVVLM[147.04]NR.Q	YOR341W	1788.99	126.127	11914.6	127.13	64197.4	12391.9	67723.1	5.46509	0.18298
1	JL033021_040221_RPA2HFH_Q2_1to10_100B.08047.08047.6	2.7e-08	R.GVAM[147.04]NPVDHPHGGGNHQHIGK[425.27]ASTISR.G	YFR031C-A,YIL018W	3086.53	126.127	14672.2	127.13	107126	15028.7	113477	7.5507	0.132438
0.9998	JL033021_040221_RPA2HFH_Q2_1to10_100B.08084.08084.3	0.000482	K.M[147.04]VAEAEKFK[407.26]EEDEKESQR.L	YAL005C,YLL024C	2477.18	126.127	2230.31	127.13	12522	2315.5	13218.1	5.70855	0.175176
1	JL033021_040221_RPA2HFH_Q2_1to10_100B.08118.08118.4	1.57e-05	R.GVAM[147.04]NPVDHPHGGGNHQHIGK[425.27]ASTISR.G	YFR031C-A,YIL018W	3086.53	126.126	3297.35	127.13	22479.2	3390.61	23792.3	7.01712	0.142509
1	JL033021_040221_RPA2HFH_Q2_1to10_100B.08158.08158.4	0.000748	R.GVAM[147.04]NPVDHPHGGGNHQHIGK[425.27]ASTISR.G	YFR031C-A,YIL018W	3086.53	126.127	2747.43	127.13	17078.8	2838.74	18054.7	6.3601	0.15723
1	JL033021_040221_RPA2HFH_Q2_1to10_100B.08173.08173.5	1.79e-08	R.GVAM[147.04]NPVDHPHGGGNHQHIGK[425.27]ASTISR.G	YFR031C-A,YIL018W	3086.53	126.127	9222.16	127.13	60956.2	9498.75	64491.7	6.78949	0.147287
1	JL033021_040221_RPA2HFH_Q2_1to10_100B.08217.08217.6	0.000453	R.GVAM[147.04]NPVDHPHGGGNHQHIGK[425.27]ASTISR.G	YFR031C-A,YIL018W	3086.53	126.127	12358.4	127.13	79001.8	12751.2	83547.4	6.55213	0.152622
1	JL033021_040221_RPA2HFH_Q2_1to10_100B.08268.08268.4	0.00337	R.HAEHIK[425.27]LYGSDNDM[147.04]R.L	YPR035W	2098	126.127	9705.22	127.13	53962	10080.3	56953.5	5.65	0.176991
1	JL033021_040221_RPA2HFH_Q2_1to10_100B.08471.08471.4	4.16e-06	R.SHFYPQGEK[425.27]ASPYGHHGAR.K	YDR481C	2422.16	126.127	7526.39	127.13	43201.1	7806.07	45617.9	5.8439	0.171119
0.9999	JL033021_040221_RPA2HFH_Q2_1to10_100B.08567.08567.3	0.0594	R.HM[147.04]VNDK[425.27]FQVR.S	YPR010C	1585.81	126.127	23338.7	127.13	148407	24086.9	156935	6.51538	0.153483
0.9948	JL033021_040221_RPA2HFH_Q2_1to10_100B.08579.08579.3	1.02	R.NTTVPTIK[425.27]R.R	YDL229W,YNL209W	1325.77	126.126	22131.3	127.13	141299	22836.2	149427	6.54342	0.152825
0.9997	JL033021_040221_RPA2HFH_Q2_1to10_100B.08739.08739.3	0.00594	R.HM[147.04]VNDK[425.27]FQVR.S	YPR010C	1585.81	126.127	38572.1	127.13	268444	39617.8	284197	7.17347	0.139402
1	JL033021_040221_RPA2HFH_Q2_1to10_100B.08823.08823.4	6.56e-08	D.PK[425.27]ELYNNAHVYAR.D	YPR110C	1870.98	126.127	12701.5	127.13	88210.3	13047.4	93384.3	7.15733	0.139717
1	JL033021_040221_RPA2HFH_Q2_1to10_100B.08833.08833.3	1.05e-06	R.NK[425.27]NNDIESSSPSQLQHEA.-	YML123C	2294.09	126.127	5204.86	127.13	24260.8	5444.55	25530.1	4.68911	0.21326
1	JL033021_040221_RPA2HFH_Q2_1to10_100B.08837.08837.3	0.000181	R.NK[425.27]NNDIESSSPSQLQHEA.-	YML123C	2294.09	126.127	4287.38	127.13	25210.8	4441.75	26630.5	5.99549	0.166792
1	JL033021_040221_RPA2HFH_Q2_1to10_100B.08858.08858.3	1.17e-08	D.PK[425.27]ELYNNAHVYAR.D	YPR110C	1870.98	126.127	10829.7	127.13	57650.2	11269.4	60804.7	5.39558	0.185337
1	JL033021_040221_RPA2HFH_Q2_1to10_100B.08892.08892.3	9.76e-06	D.PK[425.27]ELYNNAHVYAR.D	YPR110C	1870.98	126.127	9552.25	127.13	61474.9	9852.44	65017.9	6.59916	0.151534
1	JL033021_040221_RPA2HFH_Q2_1to10_100B.08910.08910.4	0.000495	R.RTEYVSNTIAAHDNTSLK[425.27]R.K	YBR279W	2472.28	126.127	7713.49	127.13	49686.4	7955.53	52550.6	6.60554	0.151388
[truncated: 16,728 more rows]
