# Supplementary material for: Isobaric crosslinking mass spectrometry technology for studying conformational and structural changes in proteins and complexes
Source: eLife. 2024 Nov 14;13:RP99809. doi: 10.7554/eLife.99809 (PMC11563578; doi:10.7554/eLife.99809)
Supplement: Figure 1—source data 2. — The information includes the peptide sequences and protein names, sites of Qlinker modification, score, search engine (N = Nexus, P = pLink2), reporter ion intensities, and reporter ion ratios. [file elife-99809-fig1-data2.xlsx]

## Sheet: RPA2HfH.intra
index	Protein-protein	Crosslinkingsites	Xcorr	Da	ppm	spectrum	engine	xcorr	Xcorr_norm	expect	immonium1	ion1	dot1	connective1	peptide1	protein1	Unique_protein1	subunit1	realpep1	position1	immonium2	ion2	dot2	connective2	peptide2	protein2	Unique_protein2	subunit2	realpep2	position2	Q2link0mz	Q2link0intensity	Q2link1mz	Q2link1intensity	corrected126	corrected127	127/126ratio	126/127ratio	Log2(126/127)
1	RPA12
	1	RPA12:68---RPA12:73	3.86975
				0	1.12313	JL033021_040221_RPA2HFH_Q2_10to1_50B.07050.07050.3	N	3.86975	0.185479		1//6	6//20	2.05325	1.3	K.K[1267.8]NELK.D	4YM7_9_RPA12	1	RPA12	KNELK	73	//10	7//30	1.8165	1.14286	K.SVVK[1037.63]TSLK.K	4YM7_9_RPA12	1	RPA12	SVVKTSLK	68	126.127	57378.9	127.13	8640.39	62155.3	4107.82	0.0660897	15.131	3.91943
				0	4.43336	JL033021_040221_RPA2HFH_Q2_5to1_50B.07121.07121.3	N	3.77825	0.1856		1//6	6//20	1.92575	1.3	K.K[1267.8]NELK.D	4YM7_9_RPA12	1	RPA12	KNELK	73	//10	9//30	1.8525	1.5	K.SVVK[1037.64]TSLK.K	4YM7_9_RPA12	1	RPA12	SVVKTSLK	68	126.127	88770	127.13	17465.2	96126.3	10746.2	0.111793	8.9451	3.1611
				-1	2.50354	JL033021_040221_RPA2HFH_Q2_5to1_50B.07138.07138.3	N	3.67525	0.17784		//6	5//20	2.0925	1.2	K.K[1267.79]NELK.D	4YM7_9_RPA12	1	RPA12	KNELK	73	//10	6//30	1.58275	0.928571	K.SVVK[1037.63]TSLK.K	4YM7_9_RPA12	1	RPA12	SVVKTSLK	68	126.127	65746.1	127.13	14324.4	71183.1	9447.5	0.132721	7.5346	2.91353
	2	RPA12:72---RPA12:77	4.27325
				0	1.96149	JL033021_040221_RPA2HFH_Q2_5to1_50B.07654.07654.3	N	4.27325	0.19525		//7	6//17	1.558	1.375	K.TSLK[1494.85]K.N	4YM7_9_RPA12	1	RPA12	TSLKK	72	//12	10//42	2.71525	1.22222	K.NELK[982.62]DGATIK.E	4YM7_9_RPA12	1	RPA12	NELKDGATIK	77	126.127	53947	127.13	11702.9	58408.7	7697.66	0.13179	7.58786	2.92369
2	RPB10
	1	RPB10:59---RPB10:68	1.532
				-141	37.127	JL033021_040221_RPA2HFH_Q2_1to10_D.20037.20037.4	P	1.532	0.0543301	0.00353	//17	8//88	1.30225	0.535714	R.M[147.04]ILTHVDLIEK[1299.68]FLR.Y	4YM7_10_RPB10	1	RPB10	MILTHVDLIEKFLR	59	//10	2//37	0.22975	0.125	R.YNPLEK[2009.14]RD.-	4YM7_10_RPB10	1	RPB10	YNPLEKRD	68	126.127	11499.6	127.13	77848.3	11837.8	82388.5	6.95979	0.143682	-2.79904
				-141	36.6618	JL033021_040221_RPA2HFH_Q2_5to1_1ug.18577.18577.5	P	1.47275	0.0478096	0.106	//17	4//113	1.163	0.321429	R.M[147.04]ILTHVDLIEK[1299.68]FLR.Y	4YM7_10_RPB10	1	RPB10	MILTHVDLIEKFLR	59	1//10	4//46	0.30975	0.25	R.YNPLEK[2009.14]RD.-	4YM7_10_RPB10	1	RPB10	YNPLEKRD	68	126.127	86457	127.131	24676.3	93559.3	18681.1	0.199672	5.00822	2.3243
				-141	32.4735	JL033021_040221_RPA2HFH_Q2_1to1_1ug.18579.18579.5	P	1.275	0.0403098	0.28	//17	5//113	0.943	0.357143	R.M[147.04]ILTHVDLIEK[1299.68]FLR.Y	4YM7_10_RPB10	1	RPB10	MILTHVDLIEKFLR	59	//10	4//46	0.332	0.25	R.YNPLEK[2009.14]RD.-	4YM7_10_RPB10	1	RPB10	YNPLEKRD	68	126.126	37539	127.13	36774.2	40410.8	36036.6	0.891756	1.12138	0.165279
				-141	33.9394	JL033021_040221_RPA2HFH_Q2_1to5_1ug.18684.18684.5	P	1.02875	0.0352143	0.0314	//17	3//113	0.23425	0.178571	R.M[147.04]ILTHVDLIEK[1299.68]FLR.Y	4YM7_10_RPB10	1	RPB10	MILTHVDLIEKFLR	59	//10	5//46	0.7945	0.625	R.YNPLEK[2009.14]RD.-	4YM7_10_RPB10	1	RPB10	YNPLEKRD	68	126.127	9025.12	127.13	35542.7	9498.38	37276.6	3.92453	0.254808	-1.97252
				-141	35.1959	JL033021_040221_RPA2HFH_Q2_2to1_D.19565.19565.5	P	0.93075	0.0352991	0.00999	//17	4//113	0.71325	0.321429	R.M[147.04]ILTHVDLIEK[1299.68]FLR.Y	4YM7_10_RPB10	1	RPB10	MILTHVDLIEKFLR	59	//10	2//46	0.2175	0.125	R.YNPLEK[2009.14]RD.-	4YM7_10_RPB10	1	RPB10	YNPLEKRD	68	126.127	38722.2	127.13	19912.3	41831	17861.5	0.426992	2.34197	1.22772
				-141	38.6348	JL033021_040221_RPA2HFH_Q2_1to10_D.20101.20101.4	P	0.9205	0.0326291	0.598	//17	7//88	0.6755	0.464286	R.M[147.04]ILTHVDLIEK[1299.68]FLR.Y	4YM7_10_RPB10	1	RPB10	MILTHVDLIEKFLR	59	//10	2//37	0.245	0.125	R.YNPLEK[2009.14]RD.-	4YM7_10_RPB10	1	RPB10	YNPLEKRD	68	126.127	10419.6	127.13	56038.5	10843.9	59114.4	5.45139	0.18344	-2.44662
				-141	32.3524	JL033021_040221_RPA2HFH_Q2_1to10_D.19888.19888.4	P	0.90875	0.03159	0.449	//17	6//88	0.5715	0.285714	R.M[147.04]ILTHVDLIEK[1299.68]FLR.Y	4YM7_10_RPB10	1	RPB10	MILTHVDLIEKFLR	59	//10	4//37	0.33725	0.25	R.YNPLEK[2009.14]RD.-	4YM7_10_RPB10	1	RPB10	YNPLEKRD	68	126.127	10193.8	127.13	62560.4	10546	66123.5	6.27002	0.159489	-2.64847
				-141	35.3006	JL033021_040221_RPA2HFH_Q2_1to2_D.19990.19990.5	P	0.883	0.0335639	0.577	//17	4//113	0.43225	0.321429	R.M[147.04]ILTHVDLIEK[1299.68]FLR.Y	4YM7_10_RPB10	1	RPB10	MILTHVDLIEKFLR	59	1//10	5//46	0.45075	0.3125	R.YNPLEK[2009.14]RD.-	4YM7_10_RPB10	1	RPB10	YNPLEKRD	68	126.127	19462.5	127.13	29136.7	20869.4	29475.1	1.41236	0.708036	-0.498106
				-141	31.0076	JL033021_040221_RPA2HFH_Q2_1to5_1ug.18695.18695.5	P	0.86	0.0268935	0.533	//17	3//113	0.268	0.178571	R.M[147.04]ILTHVDLIEK[1299.68]FLR.Y	4YM7_10_RPB10	1	RPB10	MILTHVDLIEKFLR	59	//10	4//46	0.592	0.5625	R.YNPLEK[2009.14]RD.-	4YM7_10_RPB10	1	RPB10	YNPLEKRD	68	126.127	10549.2	127.13	39010.4	11123	40855.8	3.67309	0.27225	-1.877
				1079	97.1498	JL033021_040221_RPA2HFH_Q2_1to5_1ug.18689.18689.3	P	0.839	0.0274044	0.161	//17	3//63	0.168	0.178571	R.M[147.04]ILTHVDLIEK[1299.68]FLR.Y	4YM7_10_RPB10	1	RPB10	MILTHVDLIEKFLR	59	//10	3//28	0.671	0.5	R.YNPLEK[2009.14]RD.-	4YM7_10_RPB10	1	RPB10	YNPLEKRD	68	126.126	11507.1	127.13	45046.7	12112.8	47238.2	3.89987	0.256419	-1.96343
				-141	33.6926	JL033021_040221_RPA2HFH_Q2_2to1_D.19574.19574.4	P	0.80475	0.0280059	0.446	//17	6//88	0.56325	0.357143	R.M[147.04]ILTHVDLIEK[1299.68]FLR.Y	4YM7_10_RPB10	1	RPB10	MILTHVDLIEKFLR	59	//10	2//37	0.2415	0.125	R.YNPLEK[2009.14]RD.-	4YM7_10_RPB10	1	RPB10	YNPLEKRD	68	126.127	64776.9	127.13	33368.9	69977.1	29942.3	0.427887	2.33706	1.2247
				-141	34.6723	JL033021_040221_RPA2HFH_Q2_1to10_1ug.18817.18817.5	P	0.804	0.0265785	0.138	//17	4//113	0.294	0.214286	R.M[147.04]ILTHVDLIEK[1299.68]FLR.Y	4YM7_10_RPB10	1	RPB10	MILTHVDLIEKFLR	59	//10	4//46	0.51	0.5625	R.YNPLEK[2009.14]RD.-	4YM7_10_RPB10	1	RPB10	YNPLEKRD	68	126.127	7258.65	127.13	58934.1	7392.44	62501.1	8.45473	0.118277	-3.07976
				-141	37.9183	JL033021_040221_RPA2HFH_Q2_1to10_1ug.18761.18761.5	P	0.7675	0.0245911	0.25	//17	5//113	0.3435	0.25	R.M[147.04]ILTHVDLIEK[1299.68]FLR.Y	4YM7_10_RPB10	1	RPB10	MILTHVDLIEKFLR	59	//10	3//46	0.424	0.3125	R.YNPLEK[2009.14]RD.-	4YM7_10_RPB10	1	RPB10	YNPLEKRD	68	126.127	7332.5	127.131	49998.5	7545.2	52919.3	7.01363	0.14258	-2.81016
				-142	37.1015	JL033021_040221_RPA2HFH_Q2_2to1_D.19643.19643.5	P	0.73625	0.0266951	0.166	//17	5//113	0.44725	0.25	R.M[147.04]ILTHVDLIEK[1299.68]FLR.Y	4YM7_10_RPB10	1	RPB10	MILTHVDLIEKFLR	59	1//10	3//46	0.289	0.1875	R.YNPLEK[2009.14]RD.-	4YM7_10_RPB10	1	RPB10	YNPLEKRD	68	126.127	30793	127.13	13775.2	33282	11996.9	0.360462	2.77422	1.47208
				-141	31.2634	JL033021_040221_RPA2HFH_Q2_1to2_D.19825.19825.4	P	0.69225	0.022948	0.396	//17	4//88	0.484	0.214286	R.M[147.04]ILTHVDLIEK[1299.68]FLR.Y	4YM7_10_RPB10	1	RPB10	MILTHVDLIEKFLR	59	//10	2//37	0.20825	0.125	R.YNPLEK[2009.14]RD.-	4YM7_10_RPB10	1	RPB10	YNPLEKRD	68	126.127	19342.9	127.13	35113.7	20691.2	35890.7	1.73459	0.576505	-0.794596
				-141	36.5571	JL033021_040221_RPA2HFH_Q2_1to10_D.19956.19956.5	P	0.5535	0.0208888	0.00276	//17	3//113	0.261	0.178571	R.M[147.04]ILTHVDLIEK[1299.68]FLR.Y	4YM7_10_RPB10	1	RPB10	MILTHVDLIEKFLR	59	//10	4//46	0.2925	0.25	R.YNPLEK[2009.14]RD.-	4YM7_10_RPB10	1	RPB10	YNPLEKRD	68	126.127	8187.57	127.13	58416	8404.05	61862.4	7.36103	0.135851	-2.87991
				-141	36.5571	JL033021_040221_RPA2HFH_Q2_1to2_D.19998.19998.5	P	0.3595	0.0138368	0.397	//17	2//113	0.12275	0.0714286	R.M[147.04]ILTHVDLIEK[1299.68]FLR.Y	4YM7_10_RPB10	1	RPB10	MILTHVDLIEKFLR	59	//10	3//46	0.23675	0.1875	R.YNPLEK[2009.14]RD.-	4YM7_10_RPB10	1	RPB10	YNPLEKRD	68	126.127	19572.4	127.13	29342	20987	29685.2	1.41446	0.706984	-0.50025
				-141	37.5459	JL033021_040221_RPA2HFH_Q2_1to1_D.20624.20624.4	P	0.3575	0.0182365	0.409	//17	2//88	0.3575	0.142857	R.M[147.04]ILTHVDLIEK[1299.68]FLR.Y	4YM7_10_RPB10	1	RPB10	MILTHVDLIEKFLR	59	//10	//37	0	0	R.YNPLEK[2009.14]RD.-	4YM7_10_RPB10	1	RPB10	YNPLEKRD	68	126.127	10753.4	127.13	10363.1	11577.5	10139.6	0.875801	1.14181	0.191324
				-142	38.1322	JL033021_040221_RPA2HFH_Q2_1to1_D.20629.20629.4	P	0.277	0.011596	0.00653	//17	2//88	0.277	0.142857	R.M[147.04]ILTHVDLIEK[1299.68]FLR.Y	4YM7_10_RPB10	1	RPB10	MILTHVDLIEKFLR	59	//10	//37	0	0	R.YNPLEK[2009.14]RD.-	4YM7_10_RPB10	1	RPB10	YNPLEKRD	68	126.126	12203.8	127.13	10838.1	13146.4	10518.4	0.800092	1.24986	0.321761
3	RPA49
	1	RPA49:170---RPA49:306	4.861
				-141	44.3297	JL033021_040221_RPA2HFH_Q2_2to1_50B.11852.11852.5	NP	4.861	0.186821	0.00196	1//13	12//78	2.533	1.40909	R.FTVIK[1253.7]PGQFGR.S	4YM7_13_RPA49	1	RPA49	FTVIKPGQFGR	306	3//11	11//52	2.328	1.44444	R.TASK[1514.86]DLPTR.A	4YM7_13_RPA49	1	RPA49	TASKDLPTR	170	126.127	170252	127.13	83982.2	183950	74709.8	0.406142	2.4622	1.29995
				-141	44.0726	JL033021_040221_RPA2HFH_Q2_1to10_50B.12326.12326.5	NP	4.8355	0.19081	0.000245	1//13	12//78	2.5355	1.40909	R.FTVIK[1253.7]PGQFGR.S	4YM7_13_RPA49	1	RPA49	FTVIKPGQFGR	306	1//11	9//52	2.3	1.27778	R.TASK[1514.86]DLPTR.A	4YM7_13_RPA49	1	RPA49	TASKDLPTR	170	126.127	18721.4	127.13	128995	19253.6	136548	7.0921	0.141002	-2.82621
				-141	42.9801	JL033021_040221_RPA2HFH_Q2_1to5_50B.12200.12200.5	NP	4.71625	0.205219	1.63e-05	//13	10//78	2.3945	1.31818	R.FTVIK[1253.7]PGQFGR.S	4YM7_13_RPA49	1	RPA49	FTVIKPGQFGR	306	2//11	10//52	2.32175	1.33333	R.TASK[1514.86]DLPTR.A	4YM7_13_RPA49	1	RPA49	TASKDLPTR	170	126.127	34705.5	127.13	124089	36627.8	129856	3.54529	0.282065	-1.8259
				-141	43.5585	JL033021_040221_RPA2HFH_Q2_1to2_50B.12083.12083.5	NP	4.45075	0.192482	0.0019	//13	12//78	2.22	1.40909	R.FTVIK[1253.7]PGQFGR.S	4YM7_13_RPA49	1	RPA49	FTVIKPGQFGR	306	1//11	9//52	2.23075	1.27778	R.TASK[1514.86]DLPTR.A	4YM7_13_RPA49	1	RPA49	TASKDLPTR	170	126.127	63133.1	127.13	107671	67590.2	109710	1.62317	0.616078	-0.698816
				-141	45.0366	JL033021_040221_RPA2HFH_Q2_10to1_50B.12588.12588.5	NP	4.346	0.181754	8.25e-08	//13	11//78	2.2275	1.36364	R.FTVIK[1253.7]PGQFGR.S	4YM7_13_RPA49	1	RPA49	FTVIKPGQFGR	306	1//11	8//52	2.1185	1.11111	R.TASK[1514.86]DLPTR.A	4YM7_13_RPA49	1	RPA49	TASKDLPTR	170	126.127	100960	127.13	19583.3	109329	11921.6	0.109043	9.1707	3.19703
				-141	45.1652	JL033021_040221_RPA2HFH_Q2_5to1_50B.12456.12456.5	NP	4.1515	0.190803	5.02e-06	//13	11//78	2.22725	1.36364	R.FTVIK[1253.7]PGQFGR.S	4YM7_13_RPA49	1	RPA49	FTVIKPGQFGR	306	1//11	8//52	1.92425	1.11111	R.TASK[1514.86]DLPTR.A	4YM7_13_RPA49	1	RPA49	TASKDLPTR	170	126.127	121869	127.13	31789.5	131905	23124.6	0.175313	5.70409	2.512
				-141	43.3014	JL033021_040221_RPA2HFH_Q2_1to1_50B.12545.12545.5	NP	4.0425	0.186492	3.63e-09	//13	10//78	1.92475	1.31818	R.FTVIK[1253.7]PGQFGR.S	4YM7_13_RPA49	1	RPA49	FTVIKPGQFGR	306	1//11	8//52	2.11775	1.11111	R.TASK[1514.86]DLPTR.A	4YM7_13_RPA49	1	RPA49	TASKDLPTR	170	126.127	62200.8	127.13	57160.6	66990	55668.4	0.830996	1.20338	0.267087
				-141	40.248	JL033021_040221_RPA2HFH_Q2_1to2_50B.12084.12084.4	P	3.265	0.109894	0.0578	//13	11//62	2.4265	1.36364	R.FTVIK[1253.7]PGQFGR.S	4YM7_13_RPA49	1	RPA49	FTVIKPGQFGR	306	//11	5//43	0.8385	0.388889	R.TASK[1514.86]DLPTR.A	4YM7_13_RPA49	1	RPA49	TASKDLPTR	170	126.127	79857.1	127.13	127891	85562.4	129877	1.51792	0.658796	-0.602096
				-141	42.613	JL033021_040221_RPA2HFH_Q2_2to1_50B.11859.11859.4	NP	3.193	0.105373	0.00069	//13	10//62	1.9985	1.18182	R.FTVIK[1253.7]PGQFGR.S	4YM7_13_RPA49	1	RPA49	FTVIKPGQFGR	306	//11	7//43	1.1945	0.666667	R.TASK[1514.86]DLPTR.A	4YM7_13_RPA49	1	RPA49	TASKDLPTR	170	126.128	192537	127.131	99876.5	207988	89741.2	0.431472	2.31765	1.21266
				-141	45.1836	JL033021_040221_RPA2HFH_Q2_1to10_50B.12321.12321.4	NP	3.061	0.106346	0.00233	//13	10//62	2.289	1.31818	R.FTVIK[1253.7]PGQFGR.S	4YM7_13_RPA49	1	RPA49	FTVIKPGQFGR	306	//11	5//43	0.772	0.388889	R.TASK[1514.86]DLPTR.A	4YM7_13_RPA49	1	RPA49	TASKDLPTR	170	126.127	22470	127.13	159700	23069.1	169115	7.33077	0.136411	-2.87396
				-141	34.901	JL033021_040221_RPA2HFH_Q2_1to5_50B.12179.12179.4	NP	3.0565	0.113431	0.00019	//13	8//62	1.94225	0.954545	R.FTVIK[1253.7]PGQFGR.S	4YM7_13_RPA49	1	RPA49	FTVIKPGQFGR	306	//11	6//43	1.11425	0.611111	R.TASK[1514.86]DLPTR.A	4YM7_13_RPA49	1	RPA49	TASKDLPTR	170	126.127	25036.4	127.13	103582	26308.8	108749	4.13358	0.241921	-2.04739
				-141	42.0988	JL033021_040221_RPA2HFH_Q2_1to1_1ug.12421.12421.4	P	3.00975	0.11523	0.256	//13	12//62	2.3185	1.40909	R.FTVIK[1253.7]PGQFGR.S	4YM7_13_RPA49	1	RPA49	FTVIKPGQFGR	306	//11	6//43	0.69125	0.444444	R.TASK[1514.86]DLPTR.A	4YM7_13_RPA49	1	RPA49	TASKDLPTR	170	126.127	48152.2	127.131	48933.2	51821.6	48113.2	0.928439	1.07708	0.107121
				-141	45.8006	JL033021_040221_RPA2HFH_Q2_5to1_50B.12432.12432.4	NP	2.902	0.120098	0.324	//13	8//62	1.74675	0.954545	R.FTVIK[1253.7]PGQFGR.S	4YM7_13_RPA49	1	RPA49	FTVIKPGQFGR	306	//11	6//43	1.15525	0.611111	R.TASK[1514.86]DLPTR.A	4YM7_13_RPA49	1	RPA49	TASKDLPTR	170	126.127	64558.1	127.13	16163.9	69879.8	11525.3	0.164931	6.06314	2.60007
				-141	43.4356	JL033021_040221_RPA2HFH_Q2_2to1_1ug.12455.12455.4	P	2.62575	0.0927794	0.182	//13	9//62	1.89125	1	R.FTVIK[1253.7]PGQFGR.S	4YM7_13_RPA49	1	RPA49	FTVIKPGQFGR	306	//11	5//43	0.7345	0.388889	R.TASK[1514.86]DLPTR.A	4YM7_13_RPA49	1	RPA49	TASKDLPTR	170	126.127	66243.1	127.13	33860	71563.2	30337	0.423918	2.35895	1.23814
				-141	46.1091	JL033021_040221_RPA2HFH_Q2_5to1_1ug.12446.12446.4	NP	2.56775	0.0917922	6.89e-05	//13	7//62	1.655	0.772727	R.FTVIK[1253.7]PGQFGR.S	4YM7_13_RPA49	1	RPA49	FTVIKPGQFGR	306	//11	5//43	0.91275	0.555556	R.TASK[1514.86]DLPTR.A	4YM7_13_RPA49	1	RPA49	TASKDLPTR	170	126.127	79929.2	127.13	20043.4	86517.8	14302.7	0.165315	6.04906	2.59671
				-141	37.1632	JL033021_040221_RPA2HFH_Q2_1to2_1ug.12489.12489.4	NP	2.53925	0.0919918	0.00682	//13	10//62	1.72075	1.31818	R.FTVIK[1253.7]PGQFGR.S	4YM7_13_RPA49	1	RPA49	FTVIKPGQFGR	306	//11	5//43	0.8185	0.555556	R.TASK[1514.86]DLPTR.A	4YM7_13_RPA49	1	RPA49	TASKDLPTR	170	126.127	32629.8	127.13	55572.8	34934	56621.5	1.62081	0.616975	-0.696716
				-141	43.2299	JL033021_040221_RPA2HFH_Q2_10to1_50B.12556.12556.4	P	2.4445	0.103028	0.000977	//13	8//62	1.8565	0.954545	R.FTVIK[1253.7]PGQFGR.S	4YM7_13_RPA49	1	RPA49	FTVIKPGQFGR	306	//11	3//43	0.588	0.277778	R.TASK[1514.86]DLPTR.A	4YM7_13_RPA49	1	RPA49	TASKDLPTR	170	126.127	53503.8	127.13	7700.45	57960.6	3448.48	0.059497	16.8076	4.07104
				-141	41.7903	JL033021_040221_RPA2HFH_Q2_1to10_1ug.12556.12556.4	NP	2.3625	0.0933204	0.0821	//13	8//62	1.35725	0.772727	R.FTVIK[1253.7]PGQFGR.S	4YM7_13_RPA49	1	RPA49	FTVIKPGQFGR	306	//11	4//43	1.00525	0.5	R.TASK[1514.86]DLPTR.A	4YM7_13_RPA49	1	RPA49	TASKDLPTR	170	126.127	9904.87	127.13	71584.9	10159.3	75819.9	7.46311	0.133992	-2.89978
				-141	41.5847	JL033021_040221_RPA2HFH_Q2_1to1_50B.12512.12512.4	P	2.301	0.0872153	9.7e-07	//13	8//62	1.493	0.681818	R.FTVIK[1253.7]PGQFGR.S	4YM7_13_RPA49	1	RPA49	FTVIKPGQFGR	306	//11	5//43	0.808	0.388889	R.TASK[1514.86]DLPTR.A	4YM7_13_RPA49	1	RPA49	TASKDLPTR	170	126.127	42691.4	127.13	45023.6	45931.3	44413.9	0.966963	1.03417	0.0484677
				-779	122.041	JL033021_040221_RPA2HFH_Q2_1to10_50B.12312.12312.5	P	2.28675	0.0739725	0.00144	//13	7//78	1.574	0.954545	R.FTVIK[1253.7]PGQFGR.S	4YM7_13_RPA49	1	RPA49	FTVIKPGQFGR	306	//11	5//52	0.71275	0.388889	R.TASK[1514.86]DLPTR.A	4YM7_13_RPA49	1	RPA49	TASKDLPTR	170	126.127	20960.4	127.131	147426	21531.8	156097	7.24962	0.137938	-2.85791
				-142	45.5949	JL033021_040221_RPA2HFH_Q2_1to5_1ug.12488.12488.4	P	2.09525	0.0797082	8.35e-06	//13	8//62	1.4855	0.818182	R.FTVIK[1253.7]PGQFGR.S	4YM7_13_RPA49	1	RPA49	FTVIKPGQFGR	306	//11	4//43	0.60975	0.333333	R.TASK[1514.86]DLPTR.A	4YM7_13_RPA49	1	RPA49	TASKDLPTR	170	126.127	18040.4	127.13	62762.3	19053.7	65635.4	3.44475	0.290297	-1.7844
				-141	38.3971	JL033021_040221_RPA2HFH_Q2_10to1_1ug.12406.12406.4	P	1.35725	0.0515526	0.166	//13	6//62	0.85975	0.454545	R.FTVIK[1253.7]PGQFGR.S	4YM7_13_RPA49	1	RPA49	FTVIKPGQFGR	306	//11	5//43	0.4975	0.555556	R.TASK[1514.86]DLPTR.A	4YM7_13_RPA49	1	RPA49	TASKDLPTR	170	126.127	86507.6	127.131	16862.1	93677.7	10303.1	0.109985	9.09217	3.18462
				-141	44.361	JL033021_040221_RPA2HFH_Q2_1to1_50B.12491.12491.4	P	1.16875	0.0470237	0.633	//13	5//62	0.9915	0.318182	R.FTVIK[1253.7]PGQFGR.S	4YM7_13_RPA49	1	RPA49	FTVIKPGQFGR	306	//11	1//43	0.17725	0.0555556	R.TASK[1514.86]DLPTR.A	4YM7_13_RPA49	1	RPA49	TASKDLPTR	170	126.126	27810.5	127.13	28635.2	29926.8	28188.4	0.941912	1.06167	0.0863364
				-149	-72.244	JL033021_040221_RPA2HFH_Q2_1to1_50B.12588.12588.4	P	1.00375	0.0325486	0.00409	//13	6//62	0.6585	0.363636	R.FTVIK[1253.7]PGQFGR.S	4YM7_13_RPA49	1	RPA49	FTVIKPGQFGR	306	//11	3//43	0.34525	0.166667	R.TASK[1514.86]DLPTR.A	4YM7_13_RPA49	1	RPA49	TASKDLPTR	170	126.127	34435.1	127.13	34277.4	37065	33639.7	0.907586	1.10182	0.139893
	2	RPA49:170---RPA49:211	3.776
				-141	62.3141	JL033021_040221_RPA2HFH_Q2_5to1_1ug.11329.11329.4	NP	3.776	0.15379	6.23e-14	//11	8//48	2.11825	1.16667	R.TASK[1198.71]DLPTR.A	4YM7_13_RPA49	1	RPA49	TASKDLPTR	170	//8	6//40	1.65775	1	K.K[1253.7]ELQFIR.V	4YM7_13_RPA49	1	RPA49	KELQFIR	211	126.127	71292.5	127.13	16847.6	77177.5	11653.4	0.150995	6.62274	2.72743
				-141	51.8754	JL033021_040221_RPA2HFH_Q2_5to1_50B.11335.11335.4	NP	3.37925	0.144849	1.37e-12	//11	7//48	1.91125	1	R.TASK[1198.71]DLPTR.A	4YM7_13_RPA49	1	RPA49	TASKDLPTR	170	//8	6//40	1.468	1	K.K[1253.7]ELQFIR.V	4YM7_13_RPA49	1	RPA49	KELQFIR	211	126.127	100957	127.131	24899.3	109283	17618.4	0.161219	6.20275	2.63291
				-141	45.7071	JL033021_040221_RPA2HFH_Q2_1to2_50B.10951.10951.4	NP	3.34	0.126081	0.000197	//11	6//48	1.89775	0.944444	R.TASK[1198.71]DLPTR.A	4YM7_13_RPA49	1	RPA49	TASKDLPTR	170	//8	6//40	1.44225	1	K.K[1253.7]ELQFIR.V	4YM7_13_RPA49	1	RPA49	KELQFIR	211	126.127	55240.9	127.13	78705.2	59266.9	79380	1.33936	0.746623	-0.421549
				-2340	171.776	JL033021_040221_RPA2HFH_Q2_1to1_50B.11417.11417.8	P	2.67225	0.111793	2.65e-13	//11	6//57	1.39525	0.611111	R.TASK[1198.71]DLPTR.A	4YM7_13_RPA49	1	RPA49	TASKDLPTR	170	//8	6//48	1.277	1	K.K[1253.7]ELQFIR.V	4YM7_13_RPA49	1	RPA49	KELQFIR	211	126.127	42295.7	127.13	35260.9	45581.5	33987.9	0.74565	1.34111	0.423429
				-141	51.2823	JL033021_040221_RPA2HFH_Q2_10to1_50B.11370.11370.4	NP	2.40825	0.0996112	0.000183	//11	6//48	1.15925	0.611111	R.TASK[1198.71]DLPTR.A	4YM7_13_RPA49	1	RPA49	TASKDLPTR	170	//8	4//40	1.249	0.857143	K.K[1253.7]ELQFIR.V	4YM7_13_RPA49	1	RPA49	KELQFIR	211	126.127	51658.7	127.13	8637.05	55952	4617.76	0.0825308	12.1167	3.59892
				-141	62.3141	JL033021_040221_RPA2HFH_Q2_5to1_1ug.11340.11340.4	P	2.38575	0.091682	0.000129	//11	5//48	0.84525	0.388889	R.TASK[1198.71]DLPTR.A	4YM7_13_RPA49	1	RPA49	TASKDLPTR	170	//8	5//40	1.5405	0.928571	K.K[1253.7]ELQFIR.V	4YM7_13_RPA49	1	RPA49	KELQFIR	211	126.127	67812	127.13	15500.3	73414	10522.2	0.143326	6.97709	2.80263
				-141	53.7734	JL033021_040221_RPA2HFH_Q2_1to2_1ug.11405.11405.4	P	2.0515	0.0819911	0.00313	//11	5//48	0.99	0.555556	R.TASK[1198.71]DLPTR.A	4YM7_13_RPA49	1	RPA49	TASKDLPTR	170	//8	5//40	1.0615	0.928571	K.K[1253.7]ELQFIR.V	4YM7_13_RPA49	1	RPA49	KELQFIR	211	126.127	29191.4	127.13	40899.3	31324.5	41206.3	1.31547	0.760187	-0.395573
				408	-161.103	JL033021_040221_RPA2HFH_Q2_5to1_50B.11385.11385.3	P	1.3685	0.0609781	0.221	//11	4//39	0.634	0.333333	R.TASK[1198.71]DLPTR.A	4YM7_13_RPA49	1	RPA49	TASKDLPTR	170	//8	5//32	0.7345	0.928571	K.K[1253.7]ELQFIR.V	4YM7_13_RPA49	1	RPA49	KELQFIR	211	126.127	77318.8	127.13	19918.9	83687.8	14403.6	0.172111	5.81022	2.53859
	3	RPA49:282---RPA49:306	5.019
				-141	48.3736	JL033021_040221_RPA2HFH_Q2_1to2_50B.12754.12754.5	NP	5.019	0.192912	0.000268	//13	14//82	3.0435	1.59091	R.FTVIK[1024.63]PGQFGR.S	4YM7_13_RPA49	1	RPA49	FTVIKPGQFGR	306	//6	4//35	1.9755	1	K.TK[1514.86]LLER.L	4YM7_13_RPA49	1	RPA49	TKLLER	282	126.127	80297.3	127.13	132294	86004	134556	1.56453	0.63917	-0.645729
				-141	47.3777	JL033021_040221_RPA2HFH_Q2_5to1_1ug.13146.13146.5	NP	5.01825	0.217029	1.12e-09	//13	12//82	3.06175	1.5	R.FTVIK[1024.63]PGQFGR.S	4YM7_13_RPA49	1	RPA49	FTVIKPGQFGR	306	//6	4//35	1.9565	1	K.TK[1514.86]LLER.L	4YM7_13_RPA49	1	RPA49	TKLLER	282	126.127	73219.5	127.13	18393.7	79254.7	13137.3	0.16576	6.03281	2.59283
				-141	46.3108	JL033021_040221_RPA2HFH_Q2_2to1_50B.12484.12484.5	NP	4.959	0.191693	5.2e-06	//13	12//82	2.987	1.5	R.FTVIK[1024.63]PGQFGR.S	4YM7_13_RPA49	1	RPA49	FTVIKPGQFGR	306	//6	4//35	1.972	1	K.TK[1514.86]LLER.L	4YM7_13_RPA49	1	RPA49	TKLLER	282	126.127	120060	127.13	62620.8	129692	56325.2	0.434298	2.30256	1.20324
				-141	47.5911	JL033021_040221_RPA2HFH_Q2_1to5_50B.12897.12897.5	NP	4.908	0.186804	1.61e-05	//13	12//82	2.943	1.5	R.FTVIK[1024.63]PGQFGR.S	4YM7_13_RPA49	1	RPA49	FTVIKPGQFGR	306	//6	4//35	1.965	1	K.TK[1514.86]LLER.L	4YM7_13_RPA49	1	RPA49	TKLLER	282	126.127	38131.5	127.13	145130	40172	152096	3.78611	0.264123	-1.92072
				-141	48.4447	JL033021_040221_RPA2HFH_Q2_1to2_1ug.13233.13233.5	NP	4.77075	0.190838	1.13e-05	//13	11//82	2.80825	1.31818	R.FTVIK[1024.63]PGQFGR.S	4YM7_13_RPA49	1	RPA49	FTVIKPGQFGR	306	//6	4//35	1.9625	1	K.TK[1514.86]LLER.L	4YM7_13_RPA49	1	RPA49	TKLLER	282	126.127	33086.8	127.13	56217.7	35424.4	57271.5	1.61672	0.618534	-0.693074
				-141	48.8715	JL033021_040221_RPA2HFH_Q2_1to1_1ug.13145.13145.5	NP	4.74775	0.19222	0.00014	//13	11//82	2.76125	1.31818	R.FTVIK[1024.63]PGQFGR.S	4YM7_13_RPA49	1	RPA49	FTVIKPGQFGR	306	//6	4//35	1.9865	1	K.TK[1514.86]LLER.L	4YM7_13_RPA49	1	RPA49	TKLLER	282	126.127	49473.5	127.13	48880.2	53254.9	47937.7	0.900155	1.11092	0.151754
				-141	48.8003	JL033021_040221_RPA2HFH_Q2_1to10_1ug.13268.13268.5	NP	4.6405	0.191927	0.000281	//13	11//82	2.67725	1.31818	R.FTVIK[1024.63]PGQFGR.S	4YM7_13_RPA49	1	RPA49	FTVIKPGQFGR	306	//6	5//35	1.96325	1.08333	K.TK[1514.86]LLER.L	4YM7_13_RPA49	1	RPA49	TKLLER	282	126.127	12031.1	127.13	82517.6	12376.2	87344.3	7.05746	0.141694	-2.81915
				-141	48.089	JL033021_040221_RPA2HFH_Q2_2to1_1ug.13166.13166.5	NP	4.62	0.186976	0.000426	//13	11//82	2.6525	1.45455	R.FTVIK[1024.63]PGQFGR.S	4YM7_13_RPA49	1	RPA49	FTVIKPGQFGR	306	//6	4//35	1.9675	1	K.TK[1514.86]LLER.L	4YM7_13_RPA49	1	RPA49	TKLLER	282	126.127	70185.2	127.13	36369.3	75817.9	32672	0.430928	2.32058	1.21448
				-141	53.3526	JL033021_040221_RPA2HFH_Q2_1to10_50B.12988.12988.5	NP	4.562	0.182626	0.000302	//13	11//82	2.6305	1.31818	R.FTVIK[1024.63]PGQFGR.S	4YM7_13_RPA49	1	RPA49	FTVIKPGQFGR	306	//6	4//35	1.9315	1	K.TK[1514.86]LLER.L	4YM7_13_RPA49	1	RPA49	TKLLER	282	126.127	13884	127.13	95492.3	14280.1	101081	7.07847	0.141273	-2.82344
				-141	44.2481	JL033021_040221_RPA2HFH_Q2_10to1_1ug.13096.13096.5	NP	4.48625	0.197802	0.00465	//13	11//82	2.55775	1.31818	R.FTVIK[1024.63]PGQFGR.S	4YM7_13_RPA49	1	RPA49	FTVIKPGQFGR	306	//6	4//35	1.9285	1	K.TK[1514.86]LLER.L	4YM7_13_RPA49	1	RPA49	TKLLER	282	126.127	87617.6	127.13	16441.3	94884.9	9752.54	0.102783	9.72925	3.28233
				-141	48.4447	JL033021_040221_RPA2HFH_Q2_1to1_100B.13816.13816.5	NP	4.33625	0.180286	6.9e-05	//13	11//82	2.41675	1.22727	R.FTVIK[1024.63]PGQFGR.S	4YM7_13_RPA49	1	RPA49	FTVIKPGQFGR	306	//6	4//35	1.9195	1	K.TK[1514.86]LLER.L	4YM7_13_RPA49	1	RPA49	TKLLER	282	126.127	46207.6	127.13	45280.6	49742.5	44373.7	0.892068	1.12099	0.164774
				-141	48.5158	JL033021_040221_RPA2HFH_Q2_5to1_100B.13775.13775.5	NP	3.9325	0.158773	0.00786	//13	10//82	2.3085	1.18182	R.FTVIK[1024.63]PGQFGR.S	4YM7_13_RPA49	1	RPA49	FTVIKPGQFGR	306	//6	4//35	1.624	1	K.TK[1514.86]LLER.L	4YM7_13_RPA49	1	RPA49	TKLLER	282	126.127	72865.2	127.13	19471.3	78861.7	14323.8	0.181632	5.50564	2.46091
				-141	47.52	JL033021_040221_RPA2HFH_Q2_10to1_100B.13815.13815.5	P	3.60475	0.144673	0.0725	//13	8//82	1.89975	1	R.FTVIK[1024.63]PGQFGR.S	4YM7_13_RPA49	1	RPA49	FTVIKPGQFGR	306	//6	4//35	1.705	1	K.TK[1514.86]LLER.L	4YM7_13_RPA49	1	RPA49	TKLLER	282	126.127	76604.7	127.13	12848.8	82970.9	6891.55	0.0830598	12.0395	3.58971
				-141	49.5116	JL033021_040221_RPA2HFH_Q2_10to1_50B.13318.13318.5	NP	3.53225	0.143517	2.91e-09	//13	8//82	1.78025	0.818182	R.FTVIK[1024.63]PGQFGR.S	4YM7_13_RPA49	1	RPA49	FTVIKPGQFGR	306	//6	4//35	1.752	1	K.TK[1514.86]LLER.L	4YM7_13_RPA49	1	RPA49	TKLLER	282	126.127	48814.6	127.13	8506.51	52868.8	4733.19	0.0895272	11.1698	3.48153
				-141	50.1518	JL033021_040221_RPA2HFH_Q2_1to1_50B.13252.13252.5	NP	3.4405	0.162787	4.38e-09	//13	9//82	1.8385	1.13636	R.FTVIK[1024.63]PGQFGR.S	4YM7_13_RPA49	1	RPA49	FTVIKPGQFGR	306	//6	4//35	1.602	1	K.TK[1514.86]LLER.L	4YM7_13_RPA49	1	RPA49	TKLLER	282	126.127	34829.5	127.13	33487.2	37499.1	32757.5	0.873553	1.14475	0.195032
				-141	48.209	JL033021_040221_RPA2HFH_Q2_1to2_50B.12753.12753.4	P	2.941	0.100942	0.00386	//13	11//66	2.361	1.36364	R.FTVIK[1024.63]PGQFGR.S	4YM7_13_RPA49	1	RPA49	FTVIKPGQFGR	306	//6	4//29	0.58	1	K.TK[1514.86]LLER.L	4YM7_13_RPA49	1	RPA49	TKLLER	282	126.127	107964	127.13	186734	115564	190408	1.64764	0.606929	-0.7204
				-141	46.2743	JL033021_040221_RPA2HFH_Q2_1to5_50B.12885.12885.4	P	2.53225	0.0896451	2.49e-05	//13	10//66	2.03275	1.31818	R.FTVIK[1024.63]PGQFGR.S	4YM7_13_RPA49	1	RPA49	FTVIKPGQFGR	306	//6	4//29	0.4995	1	K.TK[1514.86]LLER.L	4YM7_13_RPA49	1	RPA49	TKLLER	282	126.127	39185.8	127.13	146854	41301.3	153849	3.72503	0.268454	-1.89725
				-141	47.9814	JL033021_040221_RPA2HFH_Q2_2to1_50B.12491.12491.4	P	2.515	0.0827616	0.000657	//13	9//66	1.973	1.27273	R.FTVIK[1024.63]PGQFGR.S	4YM7_13_RPA49	1	RPA49	FTVIKPGQFGR	306	//6	4//29	0.542	1	K.TK[1514.86]LLER.L	4YM7_13_RPA49	1	RPA49	TKLLER	282	126.127	176036	127.13	89029.9	190182	79599.6	0.418545	2.38923	1.25655
				-141	50.599	JL033021_040221_RPA2HFH_Q2_2to1_1ug.13155.13155.4	P	2.1425	0.0838847	0.0166	//13	8//66	1.7355	1.09091	R.FTVIK[1024.63]PGQFGR.S	4YM7_13_RPA49	1	RPA49	FTVIKPGQFGR	306	//6	4//29	0.407	1	K.TK[1514.86]LLER.L	4YM7_13_RPA49	1	RPA49	TKLLER	282	126.127	83025.5	127.13	42328.4	89694.3	37904.9	0.422601	2.3663	1.24263
				-141	48.209	JL033021_040221_RPA2HFH_Q2_1to10_50B.12993.12993.4	P	2.12825	0.0764403	0.0319	//13	9//66	1.64825	1.13636	R.FTVIK[1024.63]PGQFGR.S	4YM7_13_RPA49	1	RPA49	FTVIKPGQFGR	306	//6	4//29	0.48	1	K.TK[1514.86]LLER.L	4YM7_13_RPA49	1	RPA49	TKLLER	282	126.127	26818.5	127.13	175958	27652.7	186146	6.73158	0.148553	-2.75095
				-141	46.9572	JL033021_040221_RPA2HFH_Q2_10to1_1ug.13106.13106.4	P	2.0545	0.0779475	0.0213	//13	8//66	1.6275	1.09091	R.FTVIK[1024.63]PGQFGR.S	4YM7_13_RPA49	1	RPA49	FTVIKPGQFGR	306	//6	4//29	0.427	1	K.TK[1514.86]LLER.L	4YM7_13_RPA49	1	RPA49	TKLLER	282	126.127	135485	127.13	26379.4	146715	16104.8	0.109769	9.11001	3.18745
				-141	47.5262	JL033021_040221_RPA2HFH_Q2_5to1_1ug.13142.13142.4	P	1.9475	0.074396	4.4e-07	//13	9//66	1.79875	1.13636	R.FTVIK[1024.63]PGQFGR.S	4YM7_13_RPA49	1	RPA49	FTVIKPGQFGR	306	//6	3//29	0.14875	0.416667	K.TK[1514.86]LLER.L	4YM7_13_RPA49	1	RPA49	TKLLER	282	126.127	91921	127.13	22985.7	99498.5	16379	0.164616	6.07475	2.60283
				-141	48.3228	JL033021_040221_RPA2HFH_Q2_1to1_1ug.13120.13120.4	P	1.937	0.0799736	0.598	//13	9//66	1.78375	1.13636	R.FTVIK[1024.63]PGQFGR.S	4YM7_13_RPA49	1	RPA49	FTVIKPGQFGR	306	//6	3//29	0.15325	0.416667	K.TK[1514.86]LLER.L	4YM7_13_RPA49	1	RPA49	TKLLER	282	126.127	51772.9	127.13	51708.4	55725.5	50762	0.910929	1.09778	0.13459
				-141	49.3471	JL033021_040221_RPA2HFH_Q2_5to1_50B.13166.13166.4	P	1.804	0.0698981	8.06e-06	//13	9//66	1.4785	1.13636	R.FTVIK[1024.63]PGQFGR.S	4YM7_13_RPA49	1	RPA49	FTVIKPGQFGR	306	//6	3//29	0.3255	0.666667	K.TK[1514.86]LLER.L	4YM7_13_RPA49	1	RPA49	TKLLER	282	126.127	72488.1	127.13	17239.4	78470.9	11965.9	0.152489	6.55786	2.71322
				-141	48.3228	JL033021_040221_RPA2HFH_Q2_1to1_50B.13251.13251.4	P	1.7065	0.0706933	2.06e-08	//13	8//66	1.527	1.09091	R.FTVIK[1024.63]PGQFGR.S	4YM7_13_RPA49	1	RPA49	FTVIKPGQFGR	306	//6	3//29	0.1795	0.666667	K.TK[1514.86]LLER.L	4YM7_13_RPA49	1	RPA49	TKLLER	282	126.127	54190.6	127.13	56414.4	58309.2	55587.8	0.953327	1.04896	0.0689563
				-141	49.9161	JL033021_040221_RPA2HFH_Q2_1to2_1ug.13202.13202.4	P	1.5915	0.0650667	0.256	//13	7//66	1.4085	0.727273	R.FTVIK[1024.63]PGQFGR.S	4YM7_13_RPA49	1	RPA49	FTVIKPGQFGR	306	//6	3//29	0.183	0.416667	K.TK[1514.86]LLER.L	4YM7_13_RPA49	1	RPA49	TKLLER	282	126.127	41454.8	127.13	63936.2	44436.4	64791.3	1.45807	0.685839	-0.544058
				-141	48.3228	JL033021_040221_RPA2HFH_Q2_10to1_50B.13293.13293.4	P	1.528	0.058184	0.000982	//13	8//66	1.47125	0.818182	R.FTVIK[1024.63]PGQFGR.S	4YM7_13_RPA49	1	RPA49	FTVIKPGQFGR	306	//6	1//29	0.05675	0.0833333	K.TK[1514.86]LLER.L	4YM7_13_RPA49	1	RPA49	TKLLER	282	126.127	57858.5	127.13	10985.2	62656.4	6577.39	0.104976	9.52603	3.25188
				-141	47.1848	JL033021_040221_RPA2HFH_Q2_1to5_1ug.13227.13227.4	P	1.31075	0.0562711	0.0188	//13	6//66	1.16825	0.590909	R.FTVIK[1024.63]PGQFGR.S	4YM7_13_RPA49	1	RPA49	FTVIKPGQFGR	306	//6	2//29	0.1425	0.333333	K.TK[1514.86]LLER.L	4YM7_13_RPA49	1	RPA49	TKLLER	282	126.127	20495.8	127.13	74154.2	21623.9	77622.3	3.58965	0.278579	-1.84384
				432	-160.363	JL033021_040221_RPA2HFH_Q2_2to1_50B.12470.12470.3	P	1.035	0.0360577	7.32e-05	//13	6//50	0.92675	0.590909	R.FTVIK[1024.63]PGQFGR.S	4YM7_13_RPA49	1	RPA49	FTVIKPGQFGR	306	//6	2//23	0.10825	0.166667	K.TK[1514.86]LLER.L	4YM7_13_RPA49	1	RPA49	TKLLER	282	126.127	114764	127.13	51408.1	124040	44785.3	0.361055	2.76966	1.46971
	4	RPA49:106---RPA49:170	2.39325
				-141	53.4674	JL033021_040221_RPA2HFH_Q2_1to10_50B.06852.06852.4	P	2.39325	0.115232	0.0905	//11	7//48	1.847	0.944444	R.TASK[969.56]DLPTR.A	4YM7_13_RPA49	1	RPA49	TASKDLPTR	170	1//8	4//29	0.54625	0.75	K.SSK[1253.7]NLR.G	4YM7_13_RPA49	1	RPA49	SSKNLR	106	126.127	18616	127.13	110021	19293.6	116226	6.02406	0.166001	-2.59074
				-141	56.671	JL033021_040221_RPA2HFH_Q2_5to1_50B.06804.06804.4	P	2.357	0.111455	0.00362	//11	7//48	1.773	1	R.TASK[969.56]DLPTR.A	4YM7_13_RPA49	1	RPA49	TASKDLPTR	170	1//8	4//29	0.584	0.75	K.SSK[1253.7]NLR.G	4YM7_13_RPA49	1	RPA49	SSKNLR	106	126.127	83040.4	127.13	21307.2	89881.5	15377.6	0.171088	5.84496	2.54719
	5	RPA49:106---RPA49:99	1.731
				-141	51.8887	JL033021_040221_RPA2HFH_Q2_5to1_50B.10574.10574.4	P	1.731	0.0615543	0.00113	//13	7//64	1.571	0.909091	K.APVLVSK[969.56]VVSK.S	4YM7_13_RPA49	1	RPA49	APVLVSKVVSK	99	//8	2//29	0.16	0.333333	K.SSK[1391.88]NLR.G	4YM7_13_RPA49	1	RPA49	SSKNLR	106	126.128	112305	127.131	29688	121550	21731.2	0.178784	5.59333	2.48371
				-141	51.7646	JL033021_040221_RPA2HFH_Q2_1to1_50B.10670.10670.4	P	1.55	0.0490235	1.9e-07	//13	6//64	1.225	0.727273	K.APVLVSK[969.56]VVSK.S	4YM7_13_RPA49	1	RPA49	APVLVSKVVSK	99	//8	4//29	0.325	0.75	K.SSK[1391.88]NLR.G	4YM7_13_RPA49	1	RPA49	SSKNLR	106	126.127	103839	127.13	106745	111742	105065	0.940241	1.06356	0.0888979
				-141	50.3994	JL033021_040221_RPA2HFH_Q2_10to1_50B.10589.10589.4	P	1.308	0.0463296	0.00228	//13	6//64	1.16	0.727273	K.APVLVSK[969.56]VVSK.S	4YM7_13_RPA49	1	RPA49	APVLVSKVVSK	99	//8	2//29	0.148	0.333333	K.SSK[1391.88]NLR.G	4YM7_13_RPA49	1	RPA49	SSKNLR	106	126.127	84372.3	127.131	15182.5	91375.7	8694.93	0.0951558	10.5091	3.39356
				386	-153.098	JL033021_040221_RPA2HFH_Q2_10to1_50B.10570.10570.3	P	1.19925	0.0459835	0.0074	//13	5//50	0.7555	0.545455	K.APVLVSK[969.56]VVSK.S	4YM7_13_RPA49	1	RPA49	APVLVSKVVSK	99	1//8	4//23	0.44375	0.75	K.SSK[1391.88]NLR.G	4YM7_13_RPA49	1	RPA49	SSKNLR	106	126.127	82004.6	127.13	14195.6	88816	7849.92	0.0883841	11.3143	3.50007
	6	RPA49:153---RPA49:170	7.5545
				-141	31.9753	JL033021_040221_RPA2HFH_Q2_2to1_50B.15609.15609.5	NP	7.5545	0.233336	2.47e-05	//15	22//156	5.85925	1.325	R.NRIDSDK[1253.7]LTDSAIDIVDSVR.T	4YM7_13_RPA49	1	RPA49	NRIDSDKLTDSAIDIVDSVR	153	//11	7//50	1.69525	1	R.TASK[2497.3]DLPTR.A	4YM7_13_RPA49	1	RPA49	TASKDLPTR	170	126.127	119885	127.13	68814.1	129452	62977.6	0.486495	2.05552	1.0395
				-142	32.2214	JL033021_040221_RPA2HFH_Q2_2to1_50B.16566.16566.5	NP	7.04675	0.234111	1e-05	//17	21//140	5.49375	1.52778	R.IDSDK[1253.7]LTDSAIDIVDSVR.T	4YM7_13_RPA49	1	RPA49	IDSDKLTDSAIDIVDSVR	153	//11	8//50	1.553	1.05556	R.TASK[2227.16]DLPTR.A	4YM7_13_RPA49	1	RPA49	TASKDLPTR	170	126.127	39504.3	127.13	20768	42672.3	18708.1	0.438414	2.28095	1.18963
				-1	3.8343	JL033021_040221_RPA2HFH_Q2_10to1_1ug.16232.16232.5	N	7.025	0.277981		//11	4//46	1.01925	0.5625	R.TASK[2638.39]DLPTR.A	4YM7_13_RPA49	1	RPA49	TASKDLPTR	170	//19	18//155	6.00575	1.36842	R.NRIDSDK[1394.78]LTDSAIDIVDSVR.T	4YM7_13_RPA49	1	RPA49	NRIDSDKLTDSAIDIVDSVR	153	126.127	77940.4	127.13	14450.7	84406.4	8488.16	0.100563	9.94401	3.31383
				-141	32.9753	JL033021_040221_RPA2HFH_Q2_5to1_50B.16089.16089.5	NP	6.8495	0.242615	7.67e-07	//15	18//156	5.06775	1.15	R.NRIDSDK[1253.7]LTDSAIDIVDSVR.T	4YM7_13_RPA49	1	RPA49	NRIDSDKLTDSAIDIVDSVR	153	//11	7//50	1.78175	1	R.TASK[2497.3]DLPTR.A	4YM7_13_RPA49	1	RPA49	TASKDLPTR	170	126.127	65080	127.131	18540.6	70426.5	14025.3	0.199149	5.02137	2.32808
				-142	38.3574	JL033021_040221_RPA2HFH_Q2_5to1_1ug.16140.16140.5	NP	6.46625	0.239517	9.54e-09	//15	14//156	4.716	0.85	R.NRIDSDK[1253.7]LTDSAIDIVDSVR.T	4YM7_13_RPA49	1	RPA49	NRIDSDKLTDSAIDIVDSVR	153	//11	8//50	1.75025	1.05556	R.TASK[2497.3]DLPTR.A	4YM7_13_RPA49	1	RPA49	TASKDLPTR	170	126.127	60588.5	127.13	15445.5	65580.7	11111.9	0.169438	5.90186	2.56117
				-142	40.8121	JL033021_040221_RPA2HFH_Q2_2to1_1ug.16178.16178.5	NP	6.456	0.239444	0.00115	//15	15//156	4.629	0.925	R.NRIDSDK[1253.7]LTDSAIDIVDSVR.T	4YM7_13_RPA49	1	RPA49	NRIDSDKLTDSAIDIVDSVR	153	//11	7//50	1.827	1	R.TASK[2497.3]DLPTR.A	4YM7_13_RPA49	1	RPA49	TASKDLPTR	170	126.126	51884	127.13	28996.9	56030.8	26414.7	0.471432	2.1212	1.08488
				-141	31.6116	JL033021_040221_RPA2HFH_Q2_1to2_50B.15727.15727.5	NP	6.44425	0.219188	0.00226	//15	16//156	4.753	0.9	R.NRIDSDK[1253.7]LTDSAIDIVDSVR.T	4YM7_13_RPA49	1	RPA49	NRIDSDKLTDSAIDIVDSVR	153	//11	7//50	1.69125	1	R.TASK[2497.3]DLPTR.A	4YM7_13_RPA49	1	RPA49	TASKDLPTR	170	126.127	49563.8	127.13	92360.4	52999.2	94522.2	1.78346	0.560706	-0.834683
				-142	35.7209	JL033021_040221_RPA2HFH_Q2_1to1_1ug.16120.16120.5	NP	6.39925	0.223282	0.000366	//15	14//156	4.51525	0.85	R.NRIDSDK[1253.7]LTDSAIDIVDSVR.T	4YM7_13_RPA49	1	RPA49	NRIDSDKLTDSAIDIVDSVR	153	//11	7//50	1.884	1	R.TASK[2497.3]DLPTR.A	4YM7_13_RPA49	1	RPA49	TASKDLPTR	170	126.127	37952.7	127.13	38677.9	40844	38039.5	0.931335	1.07373	0.102627
				-141	30.2479	JL033021_040221_RPA2HFH_Q2_1to5_50B.15930.15930.5	NP	6.35675	0.217757	3.72e-05	//15	16//156	4.69025	0.95	R.NRIDSDK[1253.7]LTDSAIDIVDSVR.T	4YM7_13_RPA49	1	RPA49	NRIDSDKLTDSAIDIVDSVR	153	//11	7//50	1.6665	1	R.TASK[2497.3]DLPTR.A	4YM7_13_RPA49	1	RPA49	TASKDLPTR	170	126.127	23738.1	127.131	96731.8	24956.5	101525	4.06808	0.245816	-2.02435
				-141	29.066	JL033021_040221_RPA2HFH_Q2_1to5_1ug.16215.16215.5	NP	6.3385	0.229577	1.12e-05	//15	13//156	4.51825	0.825	R.NRIDSDK[1253.7]LTDSAIDIVDSVR.T	4YM7_13_RPA49	1	RPA49	NRIDSDKLTDSAIDIVDSVR	153	//11	8//50	1.82025	1.05556	R.TASK[2497.3]DLPTR.A	4YM7_13_RPA49	1	RPA49	TASKDLPTR	170	126.127	12534.5	127.13	54143.3	13152.9	56893.7	4.32555	0.231184	-2.11288
				-141	34.9754	JL033021_040221_RPA2HFH_Q2_1to10_50B.16050.16050.5	NP	6.2885	0.204384	8.04e-05	//15	18//156	4.6485	1.125	R.NRIDSDK[1253.7]LTDSAIDIVDSVR.T	4YM7_13_RPA49	1	RPA49	NRIDSDKLTDSAIDIVDSVR	153	//11	8//50	1.64	1.05556	R.TASK[2497.3]DLPTR.A	4YM7_13_RPA49	1	RPA49	TASKDLPTR	170	126.128	11918.2	127.131	101128	12102.4	107297	8.86569	0.112794	-3.14823
				-2	6.24364	JL033021_040221_RPA2HFH_Q2_1to5_D.17758.17758.5	N	6.2155	0.267224		//11	5//46	0.918	0.625	R.TASK[2638.38]DLPTR.A	4YM7_13_RPA49	1	RPA49	TASKDLPTR	170	//19	14//155	5.2975	0.921053	R.NRIDSDK[1394.77]LTDSAIDIVDSVR.T	4YM7_13_RPA49	1	RPA49	NRIDSDKLTDSAIDIVDSVR	153	126.127	7152.67	127.13	22004.7	7577.87	22937.7	3.02694	0.330367	-1.59786
				-1	4.24644	JL033021_040221_RPA2HFH_Q2_2to1_50B.16584.16584.4	N	6.16125	0.163622		1//11	8//37	1.00375	0.9375	R.TASK[2368.24]DLPTR.A	4YM7_13_RPA49	1	RPA49	TASKDLPTR	170	//20	21//106	5.1575	1.38235	R.IDSDK[1394.78]LTDSAIDIVDSVR.T	4YM7_13_RPA49	1	RPA49	IDSDKLTDSAIDIVDSVR	153	126.127	76243.8	127.13	38260.9	82372.9	34155	0.41464	2.41173	1.27007
				-141	34.1572	JL033021_040221_RPA2HFH_Q2_1to2_1ug.16243.16243.5	NP	6.1165	0.22088	3.17e-06	//15	18//156	4.91675	1	R.NRIDSDK[1253.7]LTDSAIDIVDSVR.T	4YM7_13_RPA49	1	RPA49	NRIDSDKLTDSAIDIVDSVR	153	//11	5//50	1.19975	0.555556	R.TASK[2497.3]DLPTR.A	4YM7_13_RPA49	1	RPA49	TASKDLPTR	170	126.127	29355	127.13	46606	31455.5	47306.9	1.50393	0.664924	-0.588738
				-141	35.8599	JL033021_040221_RPA2HFH_Q2_1to2_50B.16572.16572.5	NP	5.97275	0.201922	0.00996	//17	14//140	4.93475	1	R.IDSDK[1253.7]LTDSAIDIVDSVR.T	4YM7_13_RPA49	1	RPA49	IDSDKLTDSAIDIVDSVR	153	//11	6//50	1.038	0.611111	R.TASK[2227.16]DLPTR.A	4YM7_13_RPA49	1	RPA49	TASKDLPTR	170	126.127	20827.8	127.13	33438.8	22315.1	33962.7	1.52196	0.657048	-0.605929
				-142	28.7205	JL033021_040221_RPA2HFH_Q2_10to1_1ug.16187.16187.5	NP	5.9485	0.204736	0.499	//15	15//156	4.7125	0.925	R.NRIDSDK[1253.7]LTDSAIDIVDSVR.T	4YM7_13_RPA49	1	RPA49	NRIDSDKLTDSAIDIVDSVR	153	//11	7//50	1.236	0.666667	R.TASK[2497.3]DLPTR.A	4YM7_13_RPA49	1	RPA49	TASKDLPTR	170	126.127	94322	127.13	20467.2	102123	13464.7	0.131848	7.58447	2.92305
				-142	32.2214	JL033021_040221_RPA2HFH_Q2_2to1_50B.16572.16572.5	NP	5.8875	0.193223	7.65e-06	//17	16//140	4.92575	1.16667	R.IDSDK[1253.7]LTDSAIDIVDSVR.T	4YM7_13_RPA49	1	RPA49	IDSDKLTDSAIDIVDSVR	153	//11	5//50	0.96175	0.555556	R.TASK[2227.16]DLPTR.A	4YM7_13_RPA49	1	RPA49	TASKDLPTR	170	126.127	44860	127.13	19686.1	48489.1	17068.1	0.351998	2.84092	1.50636
				-141	32.4298	JL033021_040221_RPA2HFH_Q2_1to10_1ug.16296.16296.5	NP	5.77	0.219684	0.0556	//15	18//156	4.56725	1	R.NRIDSDK[1253.7]LTDSAIDIVDSVR.T	4YM7_13_RPA49	1	RPA49	NRIDSDKLTDSAIDIVDSVR	153	//11	6//50	1.20275	0.611111	R.TASK[2497.3]DLPTR.A	4YM7_13_RPA49	1	RPA49	TASKDLPTR	170	126.127	10318.5	127.13	64781.2	10663.2	68492	6.42323	0.155685	-2.6833
				-141	29.3387	JL033021_040221_RPA2HFH_Q2_1to1_50B.16191.16191.5	NP	5.607	0.214581	6.45e-07	//15	11//156	4.28325	0.775	R.NRIDSDK[1253.7]LTDSAIDIVDSVR.T	4YM7_13_RPA49	1	RPA49	NRIDSDKLTDSAIDIVDSVR	153	//11	7//50	1.32375	0.666667	R.TASK[2497.3]DLPTR.A	4YM7_13_RPA49	1	RPA49	TASKDLPTR	170	126.126	27300.9	127.13	29790.8	29364.7	29472.4	1.00367	0.996348	-0.00527849
				-142	32.448	JL033021_040221_RPA2HFH_Q2_1to10_50B.16010.16010.5	NP	5.40975	0.189235	0.00271	//15	15//156	4.2535	0.925	R.NRIDSDK[1253.7]LTDSAIDIVDSVR.T	4YM7_13_RPA49	1	RPA49	NRIDSDKLTDSAIDIVDSVR	153	//11	7//50	1.15625	0.666667	R.TASK[2497.3]DLPTR.A	4YM7_13_RPA49	1	RPA49	TASKDLPTR	170	126.127	10700.7	127.13	73673.7	11005.3	77986.8	7.08629	0.141118	-2.82503
				-142	38.9292	JL033021_040221_RPA2HFH_Q2_1to10_50B.16885.16885.4	P	5.386	0.152866	0.0273	//17	16//108	4.76375	0.888889	R.IDSDK[1253.7]LTDSAIDIVDSVR.T	4YM7_13_RPA49	1	RPA49	IDSDKLTDSAIDIVDSVR	153	//11	4//41	0.62225	0.5	R.TASK[2227.16]DLPTR.A	4YM7_13_RPA49	1	RPA49	TASKDLPTR	170	126.126	9917.91	127.129	73048.3	10161.5	77386.9	7.61567	0.131308	-2.92897
				-141	34.8712	JL033021_040221_RPA2HFH_Q2_1to10_50B.16880.16880.5	NP	5.32625	0.187805	0.00124	//17	14//140	4.313	0.777778	R.IDSDK[1253.7]LTDSAIDIVDSVR.T	4YM7_13_RPA49	1	RPA49	IDSDKLTDSAIDIVDSVR	153	//11	5//50	1.01325	0.555556	R.TASK[2227.16]DLPTR.A	4YM7_13_RPA49	1	RPA49	TASKDLPTR	170	126.127	6336.22	127.131	42761.7	6523.63	45253.8	6.93691	0.144156	-2.79429
				-141	33.7935	JL033021_040221_RPA2HFH_Q2_5to1_1ug.16202.16202.5	NP	5.31225	0.245443	2.81e-05	//15	13//156	4.221	0.825	R.NRIDSDK[1253.7]LTDSAIDIVDSVR.T	4YM7_13_RPA49	1	RPA49	NRIDSDKLTDSAIDIVDSVR	153	//11	5//50	1.09125	0.555556	R.TASK[2497.3]DLPTR.A	4YM7_13_RPA49	1	RPA49	TASKDLPTR	170	126.127	58870	127.13	14670.3	63723.4	10435.4	0.163762	6.10644	2.61033
				-142	32.8117	JL033021_040221_RPA2HFH_Q2_2to1_D.16792.16792.5	NP	5.1255	0.193331	6.65e-05	//15	12//156	4.12	0.65	R.NRIDSDK[1253.7]LTDSAIDIVDSVR.T	4YM7_13_RPA49	1	RPA49	NRIDSDKLTDSAIDIVDSVR	153	//11	6//50	1.0055	0.611111	R.TASK[2497.3]DLPTR.A	4YM7_13_RPA49	1	RPA49	TASKDLPTR	170	126.127	36432.4	127.13	16871.7	39372.6	14808.8	0.376119	2.65873	1.41074
				-141	28.2511	JL033021_040221_RPA2HFH_Q2_1to5_50B.16831.16831.4	P	5.07425	0.161791	0.626	//17	15//108	4.34625	0.972222	R.IDSDK[1253.7]LTDSAIDIVDSVR.T	4YM7_13_RPA49	1	RPA49	IDSDKLTDSAIDIVDSVR	153	1//11	5//41	0.728	0.555556	R.TASK[2227.16]DLPTR.A	4YM7_13_RPA49	1	RPA49	TASKDLPTR	170	126.126	19392.5	127.13	66960.2	20485.9	70012.4	3.41759	0.292604	-1.77298
				-141	36.43	JL033021_040221_RPA2HFH_Q2_2to1_D.16680.16680.5	NP	4.93675	0.209553	1.2e-07	//15	12//156	3.9255	0.7	R.NRIDSDK[1253.7]LTDSAIDIVDSVR.T	4YM7_13_RPA49	1	RPA49	NRIDSDKLTDSAIDIVDSVR	153	//11	6//50	1.01125	0.611111	R.TASK[2497.3]DLPTR.A	4YM7_13_RPA49	1	RPA49	TASKDLPTR	170	126.127	38732.2	127.131	16822.2	41867.1	14549.2	0.34751	2.87761	1.52487
				-140	36.6846	JL033021_040221_RPA2HFH_Q2_1to5_D.17612.17612.5	P	4.925	0.202596	1.81e-05	//15	13//156	3.7955	0.725	R.NRIDSDK[1253.7]LTDSAIDIVDSVR.T	4YM7_13_RPA49	1	RPA49	NRIDSDKLTDSAIDIVDSVR	153	//11	6//50	1.1295	0.611111	R.TASK[2497.3]DLPTR.A	4YM7_13_RPA49	1	RPA49	TASKDLPTR	170	126.127	7381.15	127.13	26052.7	7792.73	27255	3.49749	0.28592	-1.80632
				-141	28.6114	JL033021_040221_RPA2HFH_Q2_1to2_D.16909.16909.5	NP	4.81675	0.186522	1.8e-09	//15	12//156	3.60925	0.65	R.NRIDSDK[1253.7]LTDSAIDIVDSVR.T	4YM7_13_RPA49	1	RPA49	NRIDSDKLTDSAIDIVDSVR	153	//11	6//50	1.2075	0.611111	R.TASK[2497.3]DLPTR.A	4YM7_13_RPA49	1	RPA49	TASKDLPTR	170	126.127	16375.2	127.13	23957.3	17563.6	24202.2	1.37798	0.725702	-0.462551
				-141	28.7347	JL033021_040221_RPA2HFH_Q2_1to5_50B.15964.15964.6	NP	4.785	0.205347	2.99e-05	//15	13//156	3.744	0.825	R.NRIDSDK[1253.7]LTDSAIDIVDSVR.T	4YM7_13_RPA49	1	RPA49	NRIDSDKLTDSAIDIVDSVR	153	//11	6//50	1.041	0.611111	R.TASK[2497.3]DLPTR.A	4YM7_13_RPA49	1	RPA49	TASKDLPTR	170	126.127	12971.8	127.13	46464.7	13689.6	48626.2	3.55207	0.281526	-1.82866
				-141	34.1572	JL033021_040221_RPA2HFH_Q2_1to5_D.17603.17603.5	NP	4.69025	0.187284	5.92e-07	//15	12//156	3.73925	0.65	R.NRIDSDK[1253.7]LTDSAIDIVDSVR.T	4YM7_13_RPA49	1	RPA49	NRIDSDKLTDSAIDIVDSVR	153	//11	5//50	0.951	0.555556	R.TASK[2497.3]DLPTR.A	4YM7_13_RPA49	1	RPA49	TASKDLPTR	170	126.127	6369.83	127.13	24659.2	6707.32	25852.5	3.85437	0.259445	-1.9465
				-141	28.9529	JL033021_040221_RPA2HFH_Q2_1to10_50B.16052.16052.6	P	4.65	0.191939	0.000157	//15	12//156	3.75425	0.8	R.NRIDSDK[1253.7]LTDSAIDIVDSVR.T	4YM7_13_RPA49	1	RPA49	NRIDSDKLTDSAIDIVDSVR	153	//11	6//50	0.89575	0.611111	R.TASK[2497.3]DLPTR.A	4YM7_13_RPA49	1	RPA49	TASKDLPTR	170	126.127	7048.71	127.13	48332.2	7251	51159.1	7.05546	0.141734	-2.81874
				-142	38.3574	JL033021_040221_RPA2HFH_Q2_1to1_50B.16165.16165.5	NP	4.629	0.189701	4.85e-08	//15	10//156	3.32525	0.525	R.NRIDSDK[1253.7]LTDSAIDIVDSVR.T	4YM7_13_RPA49	1	RPA49	NRIDSDKLTDSAIDIVDSVR	153	//11	7//50	1.30375	0.666667	R.TASK[2497.3]DLPTR.A	4YM7_13_RPA49	1	RPA49	TASKDLPTR	170	126.127	18883.1	127.13	20983.3	20307.5	20790.1	1.02377	0.976786	-0.0338863
				-142	37.165	JL033021_040221_RPA2HFH_Q2_2to1_D.17545.17545.5	NP	4.51075	0.175188	3.89e-06	//17	8//140	3.634	0.611111	R.IDSDK[1253.7]LTDSAIDIVDSVR.T	4YM7_13_RPA49	1	RPA49	IDSDKLTDSAIDIVDSVR	153	//11	6//50	0.87675	0.611111	R.TASK[2227.16]DLPTR.A	4YM7_13_RPA49	1	RPA49	TASKDLPTR	170	126.127	23363.7	127.13	11079.5	25247.1	9775.16	0.38718	2.58278	1.36892
				-141	34.5746	JL033021_040221_RPA2HFH_Q2_1to5_50B.16834.16834.5	NP	4.498	0.148131	0.000964	//17	11//140	3.47575	0.611111	R.IDSDK[1253.7]LTDSAIDIVDSVR.T	4YM7_13_RPA49	1	RPA49	IDSDKLTDSAIDIVDSVR	153	//11	5//50	1.02225	0.555556	R.TASK[2227.16]DLPTR.A	4YM7_13_RPA49	1	RPA49	TASKDLPTR	170	126.126	8721.62	127.13	32593.2	9193.23	34143.4	3.71397	0.269254	-1.89296
				-142	38.9938	JL033021_040221_RPA2HFH_Q2_1to10_D.17422.17422.5	NP	4.4525	0.179594	3.05e-07	//15	11//156	3.609	0.625	R.NRIDSDK[1253.7]LTDSAIDIVDSVR.T	4YM7_13_RPA49	1	RPA49	NRIDSDKLTDSAIDIVDSVR	153	//11	4//50	0.8435	0.5	R.TASK[2497.3]DLPTR.A	4YM7_13_RPA49	1	RPA49	TASKDLPTR	170	126.127	5476.36	127.13	31303.3	5684.34	33052.5	5.81465	0.171979	-2.53969
				-143	26.284	JL033021_040221_RPA2HFH_Q2_2to1_100B.17164.17164.5	NP	4.44775	0.168651	0.381	//15	13//156	3.4565	0.725	R.NRIDSDK[1253.7]LTDSAIDIVDSVR.T	4YM7_13_RPA49	1	RPA49	NRIDSDKLTDSAIDIVDSVR	153	//11	5//50	0.99125	0.555556	R.TASK[2497.3]DLPTR.A	4YM7_13_RPA49	1	RPA49	TASKDLPTR	170	126.127	55810	127.131	27060.2	60304.1	23987	0.397768	2.51403	1.33
				-142	33.7208	JL033021_040221_RPA2HFH_Q2_1to5_D.17787.17787.5	P	4.40225	0.175374	0.000387	//15	9//156	3.49325	0.575	R.NRIDSDK[1253.7]LTDSAIDIVDSVR.T	4YM7_13_RPA49	1	RPA49	NRIDSDKLTDSAIDIVDSVR	153	//11	5//50	0.909	0.555556	R.TASK[2497.3]DLPTR.A	4YM7_13_RPA49	1	RPA49	TASKDLPTR	170	126.127	7104.29	127.13	21439.3	7530.01	22336.2	2.96629	0.337121	-1.56866
				-141	32.8844	JL033021_040221_RPA2HFH_Q2_2to1_100B.17154.17154.5	NP	4.34475	0.157816	0.654	//15	13//156	3.21225	0.65	R.NRIDSDK[1253.7]LTDSAIDIVDSVR.T	4YM7_13_RPA49	1	RPA49	NRIDSDKLTDSAIDIVDSVR	153	1//11	7//50	1.1325	0.666667	R.TASK[2497.3]DLPTR.A	4YM7_13_RPA49	1	RPA49	TASKDLPTR	170	126.127	55748.9	127.13	27634	60233.2	24607.4	0.408536	2.44777	1.29147
				-141	31.2479	JL033021_040221_RPA2HFH_Q2_1to2_D.16853.16853.5	P	4.32875	0.170457	3.03e-11	//15	12//156	3.48225	0.65	R.NRIDSDK[1253.7]LTDSAIDIVDSVR.T	4YM7_13_RPA49	1	RPA49	NRIDSDKLTDSAIDIVDSVR	153	//11	5//50	0.8465	0.555556	R.TASK[2497.3]DLPTR.A	4YM7_13_RPA49	1	RPA49	TASKDLPTR	170	126.127	13393.4	127.13	23094.1	14336.9	23544.8	1.64226	0.608918	-0.715679
				-141	32.3389	JL033021_040221_RPA2HFH_Q2_1to10_D.17437.17437.5	P	4.2925	0.175731	1.87e-07	//15	10//156	3.379	0.6	R.NRIDSDK[1253.7]LTDSAIDIVDSVR.T	4YM7_13_RPA49	1	RPA49	NRIDSDKLTDSAIDIVDSVR	153	//11	5//50	0.9135	0.555556	R.TASK[2497.3]DLPTR.A	4YM7_13_RPA49	1	RPA49	TASKDLPTR	170	126.127	5257.37	127.13	25610.3	5493.15	26971.5	4.91003	0.203665	-2.29573
				-141	33.7935	JL033021_040221_RPA2HFH_Q2_1to10_D.17234.17234.5	NP	4.2645	0.18136	1.5e-06	//15	9//156	3.223	0.575	R.NRIDSDK[1253.7]LTDSAIDIVDSVR.T	4YM7_13_RPA49	1	RPA49	NRIDSDKLTDSAIDIVDSVR	153	//11	5//50	1.0415	0.555556	R.TASK[2497.3]DLPTR.A	4YM7_13_RPA49	1	RPA49	TASKDLPTR	170	126.127	5408.59	127.13	31650	5608.02	33430	5.96111	0.167754	-2.57558
				-143	30.3348	JL033021_040221_RPA2HFH_Q2_1to10_50B.16097.16097.6	NP	4.174	0.181616	0.000625	//15	12//156	3.153	0.725	R.NRIDSDK[1253.7]LTDSAIDIVDSVR.T	4YM7_13_RPA49	1	RPA49	NRIDSDKLTDSAIDIVDSVR	153	//11	5//50	1.021	0.555556	R.TASK[2497.3]DLPTR.A	4YM7_13_RPA49	1	RPA49	TASKDLPTR	170	126.127	7241.59	127.13	46051.8	7478.72	48698.2	6.51156	0.153573	-2.703
				-141	34.6118	JL033021_040221_RPA2HFH_Q2_1to5_D.17591.17591.5	NP	4.05725	0.160976	3.56e-06	//15	9//156	3.01575	0.5	R.NRIDSDK[1253.7]LTDSAIDIVDSVR.T	4YM7_13_RPA49	1	RPA49	NRIDSDKLTDSAIDIVDSVR	153	//11	6//50	1.0415	0.611111	R.TASK[2497.3]DLPTR.A	4YM7_13_RPA49	1	RPA49	TASKDLPTR	170	126.126	7455	127.13	22321.9	7903.16	23250.5	2.94192	0.339914	-1.55676
				-141	25.6113	JL033021_040221_RPA2HFH_Q2_1to10_D.17236.17236.5	NP	3.889	0.176616	9.2e-08	//15	10//156	2.92775	0.525	R.NRIDSDK[1253.7]LTDSAIDIVDSVR.T	4YM7_13_RPA49	1	RPA49	NRIDSDKLTDSAIDIVDSVR	153	//11	4//50	0.96125	0.5	R.TASK[2497.3]DLPTR.A	4YM7_13_RPA49	1	RPA49	TASKDLPTR	170	126.127	4526.44	127.13	31598.5	4651.78	33454.1	7.19167	0.13905	-2.84633
				-143	26.8295	JL033021_040221_RPA2HFH_Q2_1to2_D.16878.16878.5	NP	3.83175	0.146948	1.36e-11	//15	9//156	2.9365	0.5	R.NRIDSDK[1253.7]LTDSAIDIVDSVR.T	4YM7_13_RPA49	1	RPA49	NRIDSDKLTDSAIDIVDSVR	153	//11	5//50	0.89525	0.555556	R.TASK[2497.3]DLPTR.A	4YM7_13_RPA49	1	RPA49	TASKDLPTR	170	126.126	13452.8	127.13	22174.3	14408.8	22553.8	1.56528	0.638863	-0.646423
				-141	39.8848	JL033021_040221_RPA2HFH_Q2_1to5_D.17777.17777.5	P	3.82125	0.163406	0.00943	//15	9//156	3.104	0.575	R.NRIDSDK[1253.7]LTDSAIDIVDSVR.T	4YM7_13_RPA49	1	RPA49	NRIDSDKLTDSAIDIVDSVR	153	//11	4//50	0.71725	0.5	R.TASK[2497.3]DLPTR.A	4YM7_13_RPA49	1	RPA49	TASKDLPTR	170	126.127	7245.13	127.13	21366	7683.34	22245	2.89522	0.345397	-1.53367
				-142	36.7695	JL033021_040221_RPA2HFH_Q2_1to1_50B.17080.17080.5	P	2.9	0.112935	0.00188	//17	10//140	2.159	0.472222	R.IDSDK[1253.7]LTDSAIDIVDSVR.T	4YM7_13_RPA49	1	RPA49	IDSDKLTDSAIDIVDSVR	153	//11	5//50	0.741	0.555556	R.TASK[2227.16]DLPTR.A	4YM7_13_RPA49	1	RPA49	TASKDLPTR	170	126.127	12363	127.13	10119.4	13325	9733.88	0.730499	1.36893	0.453046
				-142	39.3402	JL033021_040221_RPA2HFH_Q2_2to1_D.17539.17539.5	NP	2.88775	0.100776	2.83e-05	//17	9//140	2.09725	0.444444	R.IDSDK[1253.7]LTDSAIDIVDSVR.T	4YM7_13_RPA49	1	RPA49	IDSDKLTDSAIDIVDSVR	153	//11	4//50	0.7905	0.5	R.TASK[2227.16]DLPTR.A	4YM7_13_RPA49	1	RPA49	TASKDLPTR	170	126.127	25003.1	127.13	11416.3	27022.2	9988.88	0.369654	2.70523	1.43575
				-141	31.6116	JL033021_040221_RPA2HFH_Q2_1to2_100B.17229.17229.5	P	1.8975	0.0722101	0.66	//15	9//156	1.19375	0.275	R.NRIDSDK[1253.7]LTDSAIDIVDSVR.T	4YM7_13_RPA49	1	RPA49	NRIDSDKLTDSAIDIVDSVR	153	//11	5//50	0.70375	0.555556	R.TASK[2497.3]DLPTR.A	4YM7_13_RPA49	1	RPA49	TASKDLPTR	170	126.127	25414.5	127.13	44595.2	27198.5	45505.8	1.6731	0.597693	-0.742523
				-141	29.9276	JL033021_040221_RPA2HFH_Q2_1to2_50B.16635.16635.5	P	1.749	0.0615174	0.0469	//17	7//140	1.05725	0.25	R.IDSDK[1253.7]LTDSAIDIVDSVR.T	4YM7_13_RPA49	1	RPA49	IDSDKLTDSAIDIVDSVR	153	//11	4//50	0.69175	0.5	R.TASK[2227.16]DLPTR.A	4YM7_13_RPA49	1	RPA49	TASKDLPTR	170	126.127	13866.2	127.13	23513.3	14846.2	23951.6	1.61332	0.619839	-0.690034
4	RPB5
	1	RPB5:201---RPB5:24	2.35225
				-141	58.536	JL033021_040221_RPA2HFH_Q2_2to1_50B.03264.03264.4	P	2.35225	0.0966096	0.133	//8	5//36	2.0765	1.14286	R.K[1058.54]SETSGR.Y	4YM7_5_RPB5	1	RPB5	KSETSGR	201	//8	3//30	0.27575	0.416667	K.EM[147.04]VK[1029.55]DR.G	4YM7_5_RPB5	1	RPB5	EMVKDR	24	126.127	79659.4	127.13	40781	86056.5	36548.9	0.424708	2.35456	1.23546
				-141	57.455	JL033021_040221_RPA2HFH_Q2_1to10_50B.03536.03536.4	P	2.073	0.0897986	0.629	//8	5//36	1.7725	1.14286	R.K[1058.54]SETSGR.Y	4YM7_5_RPB5	1	RPB5	KSETSGR	201	//8	3//30	0.3005	0.416667	K.EM[147.04]VK[1029.55]DR.G	4YM7_5_RPB5	1	RPB5	EMVKDR	24	126.127	10550.2	127.13	77167.6	10813.7	81744.2	7.55934	0.132287	-2.91826
	2	RPB5:201---RPB5:201	4.947
				0	6.06954	JL033021_040221_RPA2HFH_Q2_10to1_50B.02720.02720.4	N	4.947	0.282154		//8	7//35	2.4735	1.42857	R.K[1170.66]SETSGR.Y	4YM7_5_RPB5	1	RPB5	KSETSGR	201	//8	7//35	2.4735	1.42857	R.K[1170.66]SETSGR.Y	4YM7_5_RPB5	1	RPB5	KSETSGR	201	126.126	22206	127.13	3357.24	24054.4	1604.06	0.0666848	14.9959	3.9065
				310	-134.287	JL033021_040221_RPA2HFH_Q2_10to1_50B.02706.02706.3	P	4.599	0.23889	0.000641	//8	7//30	2.2995	1.5	R.K[1029.55]SETSGR.Y	4YM7_5_RPB5	1	RPB5	KSETSGR	201	//8	7//30	2.2995	1.5	R.K[1029.55]SETSGR.Y	4YM7_5_RPB5	1	RPB5	KSETSGR	201	126.126	46073.4	127.13	7433.88	49904.7	3829.87	0.0767435	13.0304	3.70381
				0	14.1131	JL033021_040221_RPA2HFH_Q2_1to2_50B.02719.02719.4	N	4.485	0.228424		//8	5//35	2.2425	1.14286	R.K[1170.67]SETSGR.Y	4YM7_5_RPB5	1	RPB5	KSETSGR	201	//8	5//35	2.2425	1.14286	R.K[1170.67]SETSGR.Y	4YM7_5_RPB5	1	RPB5	KSETSGR	201	126.127	12213.8	127.13	18351.5	13096.2	18568.6	1.41787	0.705285	-0.503721
	3	RPB5:20---RPB5:45	4.73925
				-1	0.795651	JL033021_040221_RPA2HFH_Q2_1to2_50B.05391.05391.5	N	4.73925	0.219924		//9	7//35	0.90875	1.25	R.TVK[1890.93]EM[147.04]VK.D	4YM7_5_RPB5	1	RPB5	TVKEMVK	20	//12	13//81	3.8305	1.40909	K.AK[1256.73]YC[160.03]DSM[147.04]GRPQR.K	4YM7_5_RPB5	1	RPB5	AKYCDSMGRPQR	45	126.127	60468.4	127.131	74236.6	64972.4	74122.2	1.14083	0.876558	-0.190079
				-141	42.1649	JL033021_040221_RPA2HFH_Q2_5to1_100B.05225.05225.5	NP	3.6885	0.186095	0.00168	//12	8//86	2.5945	0.875	K.AK[1115.63]YC[160.03]DSM[147.04]GRPQR.K	4YM7_5_RPB5	1	RPB5	AKYCDSMGRPQR	45	//9	5//39	1.094	0.928571	R.TVK[1749.83]EM[147.04]VK.D	4YM7_5_RPB5	1	RPB5	TVKEMVK	20	126.127	70746.3	127.13	14023.5	76608.2	8676.28	0.113255	8.82961	3.14235
				-142	37.6203	JL033021_040221_RPA2HFH_Q2_1to5_50B.05480.05480.5	P	3.663	0.150499	2.18e-05	//12	12//86	2.8815	1.16667	K.AK[1115.63]YC[160.03]DSM[147.04]GRPQR.K	4YM7_5_RPB5	1	RPB5	AKYCDSMGRPQR	45	//9	5//39	0.7815	0.928571	R.TVK[1749.83]EM[147.04]VK.D	4YM7_5_RPB5	1	RPB5	TVKEMVK	20	126.127	36070.9	127.13	103483	38276.1	107652	2.81253	0.355552	-1.49187
				-142	41.9426	JL033021_040221_RPA2HFH_Q2_1to5_50B.05495.05495.5	NP	3.593	0.140816	8.92e-06	//12	12//86	2.714	1.16667	K.AK[1115.63]YC[160.03]DSM[147.04]GRPQR.K	4YM7_5_RPB5	1	RPB5	AKYCDSMGRPQR	45	//9	5//39	0.879	0.928571	R.TVK[1749.83]EM[147.04]VK.D	4YM7_5_RPB5	1	RPB5	TVKEMVK	20	126.127	41054.5	127.13	118673	43557.1	123482	2.83495	0.35274	-1.50332
				-141	40.683	JL033021_040221_RPA2HFH_Q2_1to10_50B.05523.05523.5	P	3.58525	0.139211	0.000837	//12	9//86	2.987	1.04167	K.AK[1115.63]YC[160.03]DSM[147.04]GRPQR.K	4YM7_5_RPB5	1	RPB5	AKYCDSMGRPQR	45	//9	5//39	0.59825	0.928571	R.TVK[1749.83]EM[147.04]VK.D	4YM7_5_RPB5	1	RPB5	TVKEMVK	20	126.127	25984.5	127.13	129818	27123.5	136778	5.04279	0.198303	-2.33422
				-140	33.9896	JL033021_040221_RPA2HFH_Q2_1to10_50B.05515.05515.5	P	3.56375	0.14372	0.000406	//12	10//86	2.85125	1.08333	K.AK[1115.63]YC[160.03]DSM[147.04]GRPQR.K	4YM7_5_RPB5	1	RPB5	AKYCDSMGRPQR	45	//9	5//39	0.7125	0.928571	R.TVK[1749.83]EM[147.04]VK.D	4YM7_5_RPB5	1	RPB5	TVKEMVK	20	126.127	23151.6	127.13	121954	24115.2	128605	5.33295	0.187513	-2.41493
				-141	44.7282	JL033021_040221_RPA2HFH_Q2_10to1_100B.05208.05208.6	NP	3.51125	0.15936	0.0549	//12	8//86	2.45025	0.875	K.AK[1115.63]YC[160.03]DSM[147.04]GRPQR.K	4YM7_5_RPB5	1	RPB5	AKYCDSMGRPQR	45	//9	6//39	1.061	1	R.TVK[1749.83]EM[147.04]VK.D	4YM7_5_RPB5	1	RPB5	TVKEMVK	20	126.127	137332	127.13	20695	148764	9847.74	0.0661972	15.1064	3.91709
				-142	41.0781	JL033021_040221_RPA2HFH_Q2_1to2_50B.05374.05374.5	P	3.375	0.148849	0.00018	//12	8//86	2.655	0.875	K.AK[1115.63]YC[160.03]DSM[147.04]GRPQR.K	4YM7_5_RPB5	1	RPB5	AKYCDSMGRPQR	45	//9	5//39	0.72	0.928571	R.TVK[1749.83]EM[147.04]VK.D	4YM7_5_RPB5	1	RPB5	TVKEMVK	20	126.127	53020.4	127.13	64493.7	56974.4	64350.4	1.12946	0.885377	-0.175636
				-141	41.4239	JL033021_040221_RPA2HFH_Q2_2to1_50B.04990.04990.5	NP	3.35875	0.132409	6.37e-05	//12	8//86	2.59975	0.875	K.AK[1115.63]YC[160.03]DSM[147.04]GRPQR.K	4YM7_5_RPB5	1	RPB5	AKYCDSMGRPQR	45	//9	4//39	0.759	0.642857	R.TVK[1749.83]EM[147.04]VK.D	4YM7_5_RPB5	1	RPB5	TVKEMVK	20	126.127	149573	127.13	55055.8	161759	45569.2	0.281711	3.54974	1.82771
				-141	47.4751	JL033021_040221_RPA2HFH_Q2_1to1_100B.05667.05667.5	P	3.2335	0.192293	2.06e-05	//12	7//86	2.4425	0.625	K.AK[1115.63]YC[160.03]DSM[147.04]GRPQR.K	4YM7_5_RPB5	1	RPB5	AKYCDSMGRPQR	45	//9	4//39	0.791	0.642857	R.TVK[1749.83]EM[147.04]VK.D	4YM7_5_RPB5	1	RPB5	TVKEMVK	20	126.127	35728.1	127.13	22830.2	38560.3	21257	0.551267	1.814	0.859176
				-141	44.5112	JL033021_040221_RPA2HFH_Q2_1to1_100B.05645.05645.5	P	3.13975	0.180539	0.017	//12	8//86	2.73625	0.875	K.AK[1115.63]YC[160.03]DSM[147.04]GRPQR.K	4YM7_5_RPB5	1	RPB5	AKYCDSMGRPQR	45	//9	3//39	0.4035	0.357143	R.TVK[1749.83]EM[147.04]VK.D	4YM7_5_RPB5	1	RPB5	TVKEMVK	20	126.127	40444.4	127.13	25842.3	43650.6	24061.4	0.551227	1.81414	0.859283
				-141	44.1408	JL033021_040221_RPA2HFH_Q2_1to2_50B.05370.05370.5	P	3.062	0.137652	0.00867	//12	9//86	2.5415	0.916667	K.AK[1115.63]YC[160.03]DSM[147.04]GRPQR.K	4YM7_5_RPB5	1	RPB5	AKYCDSMGRPQR	45	//9	4//39	0.5205	0.642857	R.TVK[1749.83]EM[147.04]VK.D	4YM7_5_RPB5	1	RPB5	TVKEMVK	20	126.127	50161.2	127.13	62149.9	53892.8	62095.6	1.15221	0.8679	-0.204399
				-141	43.4685	JL033021_040221_RPA2HFH_Q2_1to1_100B.05557.05557.6	P	2.9775	0.138704	0.278	//12	8//86	1.963	0.875	K.AK[1115.63]YC[160.03]DSM[147.04]GRPQR.K	4YM7_5_RPB5	1	RPB5	AKYCDSMGRPQR	45	//9	5//39	1.0145	0.928571	R.TVK[1749.83]EM[147.04]VK.D	4YM7_5_RPB5	1	RPB5	TVKEMVK	20	126.127	99191.8	127.13	82248.9	106902	79231.7	0.741166	1.34923	0.432132
				-141	40.2083	JL033021_040221_RPA2HFH_Q2_2to1_50B.05033.05033.6	P	2.9245	0.111213	0.00323	//12	8//86	2.199	0.875	K.AK[1115.63]YC[160.03]DSM[147.04]GRPQR.K	4YM7_5_RPB5	1	RPB5	AKYCDSMGRPQR	45	//9	5//39	0.7255	0.928571	R.TVK[1749.83]EM[147.04]VK.D	4YM7_5_RPB5	1	RPB5	TVKEMVK	20	126.127	233569	127.13	100002	252485	86192.7	0.341378	2.9293	1.55056
				-141	43.2763	JL033021_040221_RPA2HFH_Q2_1to1_100B.05523.05523.5	P	2.85625	0.133267	0.024	//12	7//86	2.13775	0.625	K.AK[1115.63]YC[160.03]DSM[147.04]GRPQR.K	4YM7_5_RPB5	1	RPB5	AKYCDSMGRPQR	45	//9	4//39	0.7185	0.642857	R.TVK[1749.83]EM[147.04]VK.D	4YM7_5_RPB5	1	RPB5	TVKEMVK	20	126.126	41864.5	127.129	29507.1	45160.8	27860.9	0.616928	1.62094	0.696827
				-141	46.3636	JL033021_040221_RPA2HFH_Q2_10to1_100B.05178.05178.5	P	2.64325	0.134994	0.392	//12	7//86	1.93575	0.625	K.AK[1115.63]YC[160.03]DSM[147.04]GRPQR.K	4YM7_5_RPB5	1	RPB5	AKYCDSMGRPQR	45	//9	4//39	0.7075	0.642857	R.TVK[1749.83]EM[147.04]VK.D	4YM7_5_RPB5	1	RPB5	TVKEMVK	20	126.127	64702.5	127.13	9018.83	70094.6	3855.88	0.0550097	18.1786	4.18417
				-142	38.0348	JL033021_040221_RPA2HFH_Q2_2to1_50B.05017.05017.6	P	2.5455	0.102428	0.00356	//12	10//86	2.193	0.958333	K.AK[1115.63]YC[160.03]DSM[147.04]GRPQR.K	4YM7_5_RPB5	1	RPB5	AKYCDSMGRPQR	45	//9	4//39	0.3525	0.428571	R.TVK[1749.83]EM[147.04]VK.D	4YM7_5_RPB5	1	RPB5	TVKEMVK	20	126.127	206034	127.13	95819.3	222659	84181.9	0.378076	2.64497	1.40325
				-141	44.7582	JL033021_040221_RPA2HFH_Q2_1to1_100B.05693.05693.5	P	2.53625	0.173597	0.282	//12	7//86	2.297	0.625	K.AK[1115.63]YC[160.03]DSM[147.04]GRPQR.K	4YM7_5_RPB5	1	RPB5	AKYCDSMGRPQR	45	//9	3//39	0.23925	0.214286	R.TVK[1749.83]EM[147.04]VK.D	4YM7_5_RPB5	1	RPB5	TVKEMVK	20	126.127	30519	127.13	21838.4	32919.3	20661.9	0.627651	1.59324	0.671965
				-141	42.9058	JL033021_040221_RPA2HFH_Q2_1to10_50B.05689.05689.5	P	2.4115	0.0996179	0.175	//12	9//86	1.75525	0.708333	K.AK[1115.63]YC[160.03]DSM[147.04]GRPQR.K	4YM7_5_RPB5	1	RPB5	AKYCDSMGRPQR	45	//9	4//39	0.65625	0.642857	R.TVK[1749.83]EM[147.04]VK.D	4YM7_5_RPB5	1	RPB5	TVKEMVK	20	126.127	13047.8	127.13	82920.9	13475.5	87685.2	6.50698	0.153681	-2.70199
				-141	42.9058	JL033021_040221_RPA2HFH_Q2_10to1_100B.05307.05307.5	P	2.3835	0.154437	0.333	//12	8//86	2.134	0.666667	K.AK[1115.63]YC[160.03]DSM[147.04]GRPQR.K	4YM7_5_RPB5	1	RPB5	AKYCDSMGRPQR	45	//9	3//39	0.2495	0.214286	R.TVK[1749.83]EM[147.04]VK.D	4YM7_5_RPB5	1	RPB5	TVKEMVK	20	126.127	42735.2	127.13	7266.21	46285.9	3949.88	0.0853366	11.7183	3.55069
				-141	44.5166	JL033021_040221_RPA2HFH_Q2_5to1_100B.05223.05223.4	P	1.11475	0.0884968	0.456	//12	3//70	0.32925	0.125	K.AK[1115.63]YC[160.03]DSM[147.04]GRPQR.K	4YM7_5_RPB5	1	RPB5	AKYCDSMGRPQR	45	//9	4//32	0.7855	0.642857	R.TVK[1749.83]EM[147.04]VK.D	4YM7_5_RPB5	1	RPB5	TVKEMVK	20	126.127	37477.9	127.13	7890.73	40579.4	5091.07	0.125459	7.9707	2.99471
				-141	44.5166	JL033021_040221_RPA2HFH_Q2_10to1_100B.05173.05173.4	P	0.98225	0.0697918	0.367	//12	3//70	0.29975	0.125	K.AK[1115.63]YC[160.03]DSM[147.04]GRPQR.K	4YM7_5_RPB5	1	RPB5	AKYCDSMGRPQR	45	//9	3//32	0.6825	0.571429	R.TVK[1749.83]EM[147.04]VK.D	4YM7_5_RPB5	1	RPB5	TVKEMVK	20	126.127	29768.7	127.13	4165.7	32249.3	1791.47	0.0555506	18.0016	4.17005
				-142	32.7848	JL033021_040221_RPA2HFH_Q2_10to1_D.16893.16893.3	P	0.1125	0.00588697	0.474	//9	1//39	0.1125	0.0555556	K.AK[1099.63]YC[160.03]DSM[147.04]GR.P	4YM7_5_RPB5	1	RPB5	AKYCDSMGR	45	//9	//29	0	0	R.TVK[1368.62]EMVK.D	4YM7_5_RPB5	1	RPB5	TVKEMVK	20	126.127	8188.86	127.13	1930.58	8864.87	1333.64	0.150441	6.64712	2.73273
	4	RPB5:197---RPB5:201	5.06125
				0	1.44227	JL033021_040221_RPA2HFH_Q2_2to1_100B.07653.07653.4	N	5.06125	0.211467		//8	7//36	2.22275	1.21429	R.K[1319.84]SETSGR.Y	4YM7_5_RPB5	1	RPB5	KSETSGR	201	//10	8//39	2.8385	1.28571	R.GEVVK[1170.65]IIR.K	4YM7_5_RPB5	1	RPB5	GEVVKIIR	197	126.127	112612	127.13	58332.4	121650	52398.4	0.430731	2.32164	1.21514
				0	1.69202	JL033021_040221_RPA2HFH_Q2_5to1_100B.07617.07617.4	N	4.62075	0.235518		//8	6//36	2.25	1.14286	R.K[1319.84]SETSGR.Y	4YM7_5_RPB5	1	RPB5	KSETSGR	201	//10	8//39	2.37075	1.28571	R.GEVVK[1170.65]IIR.K	4YM7_5_RPB5	1	RPB5	GEVVKIIR	197	126.127	109119	127.13	29254.6	118098	21552.7	0.182498	5.47952	2.45405
				0	2.10465	JL033021_040221_RPA2HFH_Q2_2to1_50B.07091.07091.3	N	4.3005	0.168185		//8	8//28	2.221	1.42857	R.K[1319.84]SETSGR.Y	4YM7_5_RPB5	1	RPB5	KSETSGR	201	//10	8//31	2.0795	1.42857	R.GEVVK[1170.65]IIR.K	4YM7_5_RPB5	1	RPB5	GEVVKIIR	197	126.128	337686	127.131	160979	364901	142187	0.389659	2.56635	1.35972
				0	2.12907	JL033021_040221_RPA2HFH_Q2_1to1_100B.07788.07788.4	N	3.958	0.225636		//8	6//36	1.789	1.14286	R.K[1319.84]SETSGR.Y	4YM7_5_RPB5	1	RPB5	KSETSGR	201	//10	8//39	2.169	1.28571	R.GEVVK[1170.65]IIR.K	4YM7_5_RPB5	1	RPB5	GEVVKIIR	197	126.127	55651.6	127.13	45873.8	59979.3	44161.5	0.736279	1.35818	0.441675
				-141	55.6055	JL033021_040221_RPA2HFH_Q2_1to10_1ug.07967.07967.4	NP	3.714	0.158613	0.00013	//10	6//43	1.8	1	R.GEVVK[1029.55]IIR.K	4YM7_5_RPB5	1	RPB5	GEVVKIIR	197	//8	6//37	1.914	1.21429	R.K[1178.74]SETSGR.Y	4YM7_5_RPB5	1	RPB5	KSETSGR	201	126.127	14250	127.131	106807	14585	113173	7.75956	0.128873	-2.95597
				-141	54.5961	JL033021_040221_RPA2HFH_Q2_1to2_50B.07632.07632.4	NP	3.458	0.120211	2.23e-06	//10	5//43	1.24525	0.625	R.GEVVK[1029.55]IIR.K	4YM7_5_RPB5	1	RPB5	GEVVKIIR	197	//8	6//37	2.21275	1.21429	R.K[1178.74]SETSGR.Y	4YM7_5_RPB5	1	RPB5	KSETSGR	201	126.127	345770	127.13	591796	370163	603117	1.62933	0.61375	-0.704278
				-141	56.8168	JL033021_040221_RPA2HFH_Q2_1to2_1ug.08124.08124.4	NP	3.4395	0.136067	3.25e-07	//10	5//43	1.391	0.75	R.GEVVK[1029.55]IIR.K	4YM7_5_RPB5	1	RPB5	GEVVKIIR	197	//8	5//37	2.0485	1.14286	R.K[1178.74]SETSGR.Y	4YM7_5_RPB5	1	RPB5	KSETSGR	201	126.127	52825	127.13	93709.5	56524.9	95675.1	1.69262	0.5908	-0.759258
				-141	54.3943	JL033021_040221_RPA2HFH_Q2_1to1_50B.07991.07991.4	NP	3.3945	0.130701	6.95e-15	//10	4//43	1.258	0.5625	R.GEVVK[1029.55]IIR.K	4YM7_5_RPB5	1	RPB5	GEVVKIIR	197	//8	5//37	2.1365	1.14286	R.K[1178.74]SETSGR.Y	4YM7_5_RPB5	1	RPB5	KSETSGR	201	126.127	172398	127.13	188229	185430	186226	1.0043	0.995723	-0.00618357
				-141	56.7495	JL033021_040221_RPA2HFH_Q2_2to1_1ug.07848.07848.4	NP	3.39375	0.134739	5.11e-05	//10	4//43	1.244	0.5625	R.GEVVK[1029.55]IIR.K	4YM7_5_RPB5	1	RPB5	GEVVKIIR	197	//8	6//37	2.14975	1.21429	R.K[1178.74]SETSGR.Y	4YM7_5_RPB5	1	RPB5	KSETSGR	201	126.127	222926	127.13	106198	240892	93787.4	0.389333	2.56849	1.36092
				-141	55.2018	JL033021_040221_RPA2HFH_Q2_1to5_50B.07751.07751.4	NP	3.363	0.121102	3.08e-09	//10	4//43	1.202	0.5625	R.GEVVK[1029.55]IIR.K	4YM7_5_RPB5	1	RPB5	GEVVKIIR	197	//8	6//37	2.161	1.21429	R.K[1178.74]SETSGR.Y	4YM7_5_RPB5	1	RPB5	KSETSGR	201	126.127	139136	127.13	524703	146621	549772	3.74961	0.266695	-1.90674
				-141	56.2112	JL033021_040221_RPA2HFH_Q2_1to1_50B.08152.08152.4	NP	3.35225	0.134742	1.1e-14	//10	4//43	1.2285	0.5625	R.GEVVK[1029.55]IIR.K	4YM7_5_RPB5	1	RPB5	GEVVKIIR	197	//8	6//37	2.12375	1.21429	R.K[1178.74]SETSGR.Y	4YM7_5_RPB5	1	RPB5	KSETSGR	201	126.127	127660	127.13	126276	137416	123855	0.901313	1.10949	0.149899
				-141	54.9326	JL033021_040221_RPA2HFH_Q2_1to10_1ug.08122.08122.4	NP	3.352	0.135489	2.21e-05	//10	5//43	1.3515	0.75	R.GEVVK[1029.55]IIR.K	4YM7_5_RPB5	1	RPB5	GEVVKIIR	197	//8	5//37	2.0005	1.14286	R.K[1178.74]SETSGR.Y	4YM7_5_RPB5	1	RPB5	KSETSGR	201	126.127	21245.5	127.13	137701	21920.1	145650	6.64459	0.150498	-2.73218
				-141	56.8168	JL033021_040221_RPA2HFH_Q2_5to1_1ug.07938.07938.4	NP	3.323	0.134772	6.26e-14	//10	4//43	1.2155	0.5625	R.GEVVK[1029.55]IIR.K	4YM7_5_RPB5	1	RPB5	GEVVKIIR	197	//8	5//37	2.1075	1.14286	R.K[1178.74]SETSGR.Y	4YM7_5_RPB5	1	RPB5	KSETSGR	201	126.127	261310	127.13	68661.7	282824	50118.1	0.177206	5.64315	2.4965
				-141	54.1251	JL033021_040221_RPA2HFH_Q2_1to5_50B.07912.07912.4	NP	3.305	0.133288	4.31e-05	//10	5//43	1.2965	0.75	R.GEVVK[1029.55]IIR.K	4YM7_5_RPB5	1	RPB5	GEVVKIIR	197	//8	6//37	2.0085	1.21429	R.K[1178.74]SETSGR.Y	4YM7_5_RPB5	1	RPB5	KSETSGR	201	126.127	54762.6	127.13	205758	57714.9	215571	3.7351	0.267731	-1.90115
				-141	55.6728	JL033021_040221_RPA2HFH_Q2_5to1_50B.07997.07997.4	NP	3.2905	0.121958	0.000522	//10	5//43	1.12825	0.625	R.GEVVK[1029.55]IIR.K	4YM7_5_RPB5	1	RPB5	GEVVKIIR	197	//8	7//37	2.16225	1.28571	R.K[1178.74]SETSGR.Y	4YM7_5_RPB5	1	RPB5	KSETSGR	201	126.127	151965	127.13	41214.9	164466	30522.8	0.185588	5.38828	2.42983
				-141	55.4036	JL033021_040221_RPA2HFH_Q2_5to1_50B.07838.07838.4	NP	3.22775	0.11579	3.21e-10	//10	5//43	1.329	0.75	R.GEVVK[1029.55]IIR.K	4YM7_5_RPB5	1	RPB5	GEVVKIIR	197	//8	6//37	1.89875	1.21429	R.K[1178.74]SETSGR.Y	4YM7_5_RPB5	1	RPB5	KSETSGR	201	126.127	707431	127.131	177980	765740	127212	0.166129	6.01942	2.58962
				-141	56.4803	JL033021_040221_RPA2HFH_Q2_1to5_1ug.08149.08149.4	NP	3.205	0.13258	2.5e-10	//10	5//43	1.2775	0.75	R.GEVVK[1029.55]IIR.K	4YM7_5_RPB5	1	RPB5	GEVVKIIR	197	//8	5//37	1.9275	1.14286	R.K[1178.74]SETSGR.Y	4YM7_5_RPB5	1	RPB5	KSETSGR	201	126.127	23097.6	127.13	89935.9	24317.1	94300.2	3.87794	0.257869	-1.95529
				-141	54.0578	JL033021_040221_RPA2HFH_Q2_1to10_50B.07987.07987.4	NP	3.18775	0.128999	0.000172	//10	4//43	1.171	0.5625	R.GEVVK[1029.55]IIR.K	4YM7_5_RPB5	1	RPB5	GEVVKIIR	197	//8	6//37	2.01675	1.21429	R.K[1178.74]SETSGR.Y	4YM7_5_RPB5	1	RPB5	KSETSGR	201	126.127	41390.1	127.13	265005	42730.9	280259	6.55871	0.152469	-2.71341
				-141	55.2691	JL033021_040221_RPA2HFH_Q2_10to1_50B.07766.07766.4	NP	3.1805	0.118098	1.02e-14	//10	4//43	1.14525	0.5625	R.GEVVK[1029.55]IIR.K	4YM7_5_RPB5	1	RPB5	GEVVKIIR	197	//8	6//37	2.03525	1.21429	R.K[1178.74]SETSGR.Y	4YM7_5_RPB5	1	RPB5	KSETSGR	201	126.127	363012	127.13	64369.4	393152	36388.5	0.0925558	10.8043	3.43353
				-141	56.0766	JL033021_040221_RPA2HFH_Q2_1to10_50B.07835.07835.4	NP	3.16975	0.116131	1.12e-06	//10	5//43	1.4225	0.75	R.GEVVK[1029.55]IIR.K	4YM7_5_RPB5	1	RPB5	GEVVKIIR	197	//8	5//37	1.74725	0.928571	R.K[1178.74]SETSGR.Y	4YM7_5_RPB5	1	RPB5	KSETSGR	201	126.127	89139	127.13	612572	91686.1	648419	7.07216	0.1414	-2.82215
				-141	57.6916	JL033021_040221_RPA2HFH_Q2_1to1_1ug.08096.08096.4	NP	3.14225	0.123349	2.66e-05	//10	4//43	1.09675	0.5625	R.GEVVK[1029.55]IIR.K	4YM7_5_RPB5	1	RPB5	GEVVKIIR	197	//8	5//37	2.0455	1.14286	R.K[1178.74]SETSGR.Y	4YM7_5_RPB5	1	RPB5	KSETSGR	201	126.127	72558.8	127.13	72694.7	78096.6	71384.5	0.914054	1.09403	0.129649
				-141	55.3364	JL033021_040221_RPA2HFH_Q2_10to1_1ug.07717.07717.4	NP	3.09475	0.117388	0.00227	//10	4//43	1.1165	0.5625	R.GEVVK[1029.55]IIR.K	4YM7_5_RPB5	1	RPB5	GEVVKIIR	197	//8	6//37	1.97825	1.21429	R.K[1178.74]SETSGR.Y	4YM7_5_RPB5	1	RPB5	KSETSGR	201	126.127	416922	127.13	76375.4	451518	44414.2	0.0983662	10.1661	3.34569
				-141	55.2018	JL033021_040221_RPA2HFH_Q2_1to1_50B.08311.08311.4	NP	3.0935	0.123296	4.04e-13	//10	4//43	1.0515	0.5625	R.GEVVK[1029.55]IIR.K	4YM7_5_RPB5	1	RPB5	GEVVKIIR	197	//8	5//37	2.042	1.14286	R.K[1178.74]SETSGR.Y	4YM7_5_RPB5	1	RPB5	KSETSGR	201	126.127	72726.3	127.13	72832.7	78277.1	71517.3	0.913644	1.09452	0.130296
				-141	54.6634	JL033021_040221_RPA2HFH_Q2_1to2_50B.07795.07795.4	NP	3.08425	0.125785	0.00884	//10	6//43	1.4025	1	R.GEVVK[1029.55]IIR.K	4YM7_5_RPB5	1	RPB5	GEVVKIIR	197	//8	5//37	1.68175	0.928571	R.K[1178.74]SETSGR.Y	4YM7_5_RPB5	1	RPB5	KSETSGR	201	126.127	87337.8	127.131	147649	93514.3	150377	1.60807	0.621865	-0.685326
				-141	56.4564	JL033021_040221_RPA2HFH_Q2_2to1_100B.07499.07499.5	P	2.91	0.128104	0.00427	//11	7//60	0.828	1.11111	K.RGEVVK[1029.55]IIR.K	4YM7_5_RPB5	1	RPB5	RGEVVKIIR	197	//8	5//46	2.082	1.14286	R.K[1334.84]SETSGR.Y	4YM7_5_RPB5	1	RPB5	KSETSGR	201	126.127	192220	127.13	88992.4	207733	78106.5	0.375995	2.65961	1.41122
				-141	53.5195	JL033021_040221_RPA2HFH_Q2_1to1_1ug.07934.07934.4	NP	2.85125	0.117073	6.03e-06	//10	4//43	1.19925	0.5625	R.GEVVK[1029.55]IIR.K	4YM7_5_RPB5	1	RPB5	GEVVKIIR	197	//8	4//37	1.652	0.857143	R.K[1178.74]SETSGR.Y	4YM7_5_RPB5	1	RPB5	KSETSGR	201	126.127	67831	127.13	66907	73016.5	65607	0.898523	1.11294	0.154373
				-141	54.7307	JL033021_040221_RPA2HFH_Q2_1to5_50B.08010.08010.4	NP	2.8135	0.121965	0.000357	//10	5//43	1.0815	0.75	R.GEVVK[1029.55]IIR.K	4YM7_5_RPB5	1	RPB5	GEVVKIIR	197	//8	5//37	1.732	1.14286	R.K[1178.74]SETSGR.Y	4YM7_5_RPB5	1	RPB5	KSETSGR	201	126.127	33227.1	127.13	127986	34992.8	134165	3.83407	0.260819	-1.93888
				-141	58.7683	JL033021_040221_RPA2HFH_Q2_1to2_1ug.07966.07966.4	NP	2.781	0.112939	2.5e-07	//10	5//43	1.1635	0.75	R.GEVVK[1029.55]IIR.K	4YM7_5_RPB5	1	RPB5	GEVVKIIR	197	//8	4//37	1.6175	0.857143	R.K[1178.74]SETSGR.Y	4YM7_5_RPB5	1	RPB5	KSETSGR	201	126.127	52401.4	127.13	89955.4	56096.1	91690.4	1.63452	0.611799	-0.708871
				-141	57.557	JL033021_040221_RPA2HFH_Q2_1to2_100B.07854.07854.4	NP	2.762	0.118808	0.000103	//10	3//43	0.839	0.5	R.GEVVK[1029.55]IIR.K	4YM7_5_RPB5	1	RPB5	GEVVKIIR	197	//8	5//37	1.923	1.14286	R.K[1178.74]SETSGR.Y	4YM7_5_RPB5	1	RPB5	KSETSGR	201	126.127	44298.4	127.13	72744.3	47448.5	73974.7	1.55905	0.641416	-0.640668
				-141	47.7045	JL033021_040221_RPA2HFH_Q2_1to2_100B.08595.08595.5	P	2.693	0.14055	0.000932	//11	7//60	0.6825	0.944444	K.RGEVVK[1029.55]IIR.K	4YM7_5_RPB5	1	RPB5	RGEVVKIIR	197	//8	5//46	2.0105	1.14286	R.K[1334.84]SETSGR.Y	4YM7_5_RPB5	1	RPB5	KSETSGR	201	126.127	94394.6	127.13	132728	101289	133755	1.32053	0.757271	-0.401118
				-141	56.0093	JL033021_040221_RPA2HFH_Q2_1to5_1ug.07986.07986.4	NP	2.63875	0.116268	3.2e-06	//10	4//43	1.054	0.5625	R.GEVVK[1029.55]IIR.K	4YM7_5_RPB5	1	RPB5	GEVVKIIR	197	//8	5//37	1.58475	0.928571	R.K[1178.74]SETSGR.Y	4YM7_5_RPB5	1	RPB5	KSETSGR	201	126.127	25699.6	127.13	92518.1	27117.9	96833.6	3.57084	0.280046	-1.83626
				-141	58.4991	JL033021_040221_RPA2HFH_Q2_1to5_1ug.08168.08168.4	NP	2.609	0.106096	5.12e-10	//10	4//43	1.1905	0.5625	R.GEVVK[1029.55]IIR.K	4YM7_5_RPB5	1	RPB5	GEVVKIIR	197	//8	4//37	1.4185	0.857143	R.K[1178.74]SETSGR.Y	4YM7_5_RPB5	1	RPB5	KSETSGR	201	126.127	25051.5	127.13	89884	26436.5	94069.1	3.55831	0.281033	-1.83119
				343	-102.743	JL033021_040221_RPA2HFH_Q2_1to1_50B.08032.08032.3	P	2.54225	0.100423	1.11e-06	//10	5//35	1.05	0.75	R.GEVVK[1029.55]IIR.K	4YM7_5_RPB5	1	RPB5	GEVVKIIR	197	//8	5//30	1.49225	0.928571	R.K[1178.74]SETSGR.Y	4YM7_5_RPB5	1	RPB5	KSETSGR	201	126.127	170178	127.13	193768	182977	192361	1.05129	0.951216	-0.0721554
				-142	57.0187	JL033021_040221_RPA2HFH_Q2_1to1_1ug.08141.08141.4	NP	2.53275	0.116733	0.000454	//10	4//43	0.74275	0.5625	R.GEVVK[1029.55]IIR.K	4YM7_5_RPB5	1	RPB5	GEVVKIIR	197	1//8	7//37	1.79	1.28571	R.K[1178.74]SETSGR.Y	4YM7_5_RPB5	1	RPB5	KSETSGR	201	126.127	48261.8	127.13	47768.1	51949.9	46854.9	0.901924	1.10874	0.148922
				-141	51.4334	JL033021_040221_RPA2HFH_Q2_1to2_1ug.08159.08159.4	NP	2.47625	0.112526	4.51e-05	//10	4//43	0.7065	0.5625	R.GEVVK[1029.55]IIR.K	4YM7_5_RPB5	1	RPB5	GEVVKIIR	197	1//8	6//37	1.76975	1.21429	R.K[1178.74]SETSGR.Y	4YM7_5_RPB5	1	RPB5	KSETSGR	201	126.127	44131.6	127.13	73917.7	47258.1	75247	1.59226	0.62804	-0.671072
				-141	53.5867	JL033021_040221_RPA2HFH_Q2_1to5_100B.08465.08465.4	NP	2.45225	0.117011	4.68e-06	//10	4//43	0.88475	0.5625	R.GEVVK[1029.55]IIR.K	4YM7_5_RPB5	1	RPB5	GEVVKIIR	197	//8	5//37	1.5675	1.14286	R.K[1178.74]SETSGR.Y	4YM7_5_RPB5	1	RPB5	KSETSGR	201	126.127	21195.5	127.13	69853.2	22417.7	72950.6	3.25416	0.307299	-1.70228
				345	-176.462	JL033021_040221_RPA2HFH_Q2_2to1_1ug.07909.07909.3	P	2.411	0.0992406	0.0157	//10	5//35	0.8695	0.75	R.GEVVK[1029.55]IIR.K	4YM7_5_RPB5	1	RPB5	GEVVKIIR	197	//8	4//30	1.5415	0.857143	R.K[1178.74]SETSGR.Y	4YM7_5_RPB5	1	RPB5	KSETSGR	201	126.127	148756	127.13	74423.5	160716	66396.5	0.413129	2.42055	1.27533
				-141	56.6822	JL033021_040221_RPA2HFH_Q2_5to1_50B.08060.08060.4	NP	2.4	0.0981294	0.00528	//10	4//43	0.885	0.5625	R.GEVVK[1029.55]IIR.K	4YM7_5_RPB5	1	RPB5	GEVVKIIR	197	//8	6//37	1.515	1	R.K[1178.74]SETSGR.Y	4YM7_5_RPB5	1	RPB5	KSETSGR	201	126.127	103590	127.13	27459.1	112117	20125.1	0.1795	5.57103	2.47794
				-141	48.479	JL033021_040221_RPA2HFH_Q2_1to1_100B.08881.08881.5	P	2.37625	0.106329	1.58e-05	//11	5//60	0.41075	0.5	K.RGEVVK[1029.55]IIR.K	4YM7_5_RPB5	1	RPB5	RGEVVKIIR	197	//8	5//46	1.9655	1.14286	R.K[1334.84]SETSGR.Y	4YM7_5_RPB5	1	RPB5	KSETSGR	201	126.127	122294	127.13	114562	131692	111784	0.848825	1.1781	0.236461
				-141	54.798	JL033021_040221_RPA2HFH_Q2_10to1_100B.07564.07564.4	NP	2.3555	0.114723	0.185	//10	5//43	0.9865	0.75	R.GEVVK[1029.55]IIR.K	4YM7_5_RPB5	1	RPB5	GEVVKIIR	197	//8	5//37	1.369	1.14286	R.K[1178.74]SETSGR.Y	4YM7_5_RPB5	1	RPB5	KSETSGR	201	126.126	89452.4	127.129	17591.9	96865.3	10820.7	0.111709	8.95183	3.16218
				-141	51.4334	JL033021_040221_RPA2HFH_Q2_1to10_1ug.08169.08169.4	NP	2.31075	0.102162	5.68e-05	//10	4//43	0.8295	0.5625	R.GEVVK[1029.55]IIR.K	4YM7_5_RPB5	1	RPB5	GEVVKIIR	197	1//8	6//37	1.48125	1.21429	R.K[1178.74]SETSGR.Y	4YM7_5_RPB5	1	RPB5	KSETSGR	201	126.127	15757.4	127.131	103024	16250.5	108984	6.7065	0.149109	-2.74556
				-141	49.3309	JL033021_040221_RPA2HFH_Q2_5to1_100B.07421.07421.5	P	2.30375	0.117427	0.0509	//11	7//60	0.805	1.11111	K.RGEVVK[1029.55]IIR.K	4YM7_5_RPB5	1	RPB5	RGEVVKIIR	197	//8	5//46	1.49875	0.928571	R.K[1334.84]SETSGR.Y	4YM7_5_RPB5	1	RPB5	KSETSGR	201	126.127	185968	127.13	47157.9	201293	33838.7	0.168107	5.9486	2.57255
				343	-103.298	JL033021_040221_RPA2HFH_Q2_1to10_50B.07890.07890.3	P	2.28075	0.0784896	0.425	//10	4//35	0.92675	0.5625	R.GEVVK[1029.55]IIR.K	4YM7_5_RPB5	1	RPB5	GEVVKIIR	197	//8	4//30	1.354	0.857143	R.K[1178.74]SETSGR.Y	4YM7_5_RPB5	1	RPB5	KSETSGR	201	126.127	79132.4	127.13	592226	80999.7	627515	7.74712	0.12908	-2.95366
				-141	58.9701	JL033021_040221_RPA2HFH_Q2_2to1_1ug.08030.08030.4	NP	2.265	0.0962765	0.037	//10	5//43	0.7785	0.75	R.GEVVK[1029.55]IIR.K	4YM7_5_RPB5	1	RPB5	GEVVKIIR	197	//8	5//37	1.4865	1.14286	R.K[1178.74]SETSGR.Y	4YM7_5_RPB5	1	RPB5	KSETSGR	201	126.127	64670.7	127.13	31165.1	69879.9	27590.3	0.394825	2.53277	1.34072
				343	-127.271	JL033021_040221_RPA2HFH_Q2_5to1_1ug.08055.08055.3	P	2.1915	0.0931147	0.0456	//10	5//35	0.766	0.75	R.GEVVK[1029.55]IIR.K	4YM7_5_RPB5	1	RPB5	GEVVKIIR	197	//8	4//30	1.4255	0.857143	R.K[1178.74]SETSGR.Y	4YM7_5_RPB5	1	RPB5	KSETSGR	201	126.127	111371	127.131	26218.9	120565	18097.7	0.150107	6.66192	2.73594
				-141	53.654	JL033021_040221_RPA2HFH_Q2_2to1_1ug.08017.08017.4	NP	2.18475	0.0910578	0.00765	//10	4//43	0.75625	0.5625	R.GEVVK[1029.55]IIR.K	4YM7_5_RPB5	1	RPB5	GEVVKIIR	197	//8	4//37	1.4285	0.857143	R.K[1178.74]SETSGR.Y	4YM7_5_RPB5	1	RPB5	KSETSGR	201	126.127	66540.9	127.13	32871.3	71894.2	29250.7	0.406858	2.45786	1.2974
				-141	55.8747	JL033021_040221_RPA2HFH_Q2_10to1_50B.07950.07950.4	NP	2.1805	0.0871189	0.0662	//10	6//43	0.81325	0.6875	R.GEVVK[1029.55]IIR.K	4YM7_5_RPB5	1	RPB5	GEVVKIIR	197	//8	6//37	1.36725	1	R.K[1178.74]SETSGR.Y	4YM7_5_RPB5	1	RPB5	KSETSGR	201	126.127	90556.6	127.13	16944.1	98068	10027.4	0.10225	9.77999	3.28983
				702	-250.886	JL033021_040221_RPA2HFH_Q2_2to1_100B.07529.07529.3	P	2.1085	0.0892978	0.0699	//11	7//40	0.6475	1.11111	K.RGEVVK[1029.55]IIR.K	4YM7_5_RPB5	1	RPB5	RGEVVKIIR	197	//8	4//30	1.461	0.857143	R.K[1334.84]SETSGR.Y	4YM7_5_RPB5	1	RPB5	KSETSGR	201	126.127	298665	127.13	138230	322768	121313	0.375851	2.66063	1.41177
				-142	58.8356	JL033021_040221_RPA2HFH_Q2_1to10_100B.08199.08199.4	NP	2.105	0.112228	0.0134	//10	4//43	0.8325	0.5625	R.GEVVK[1029.55]IIR.K	4YM7_5_RPB5	1	RPB5	GEVVKIIR	197	//8	4//37	1.2725	0.857143	R.K[1178.74]SETSGR.Y	4YM7_5_RPB5	1	RPB5	KSETSGR	201	126.127	12927.9	127.13	72445.7	13430.6	76470.9	5.69377	0.175631	-2.50938
				-137	19.5368	JL033021_040221_RPA2HFH_Q2_5to1_100B.07677.07677.4	P	2.08675	0.0905983	0.158	//10	5//43	0.721	0.75	R.GEVVK[1029.55]IIR.K	4YM7_5_RPB5	1	RPB5	GEVVKIIR	197	//8	5//37	1.36575	0.928571	R.K[1178.74]SETSGR.Y	4YM7_5_RPB5	1	RPB5	KSETSGR	201	126.127	138407	127.13	32386	149835	22279.1	0.148691	6.72537	2.74961
				-141	52.5064	JL033021_040221_RPA2HFH_Q2_10to1_100B.07274.07274.5	P	2.0695	0.105436	0.0536	//11	6//60	0.4985	0.888889	K.RGEVVK[1029.55]IIR.K	4YM7_5_RPB5	1	RPB5	RGEVVKIIR	197	//8	4//46	1.571	0.857143	R.K[1334.84]SETSGR.Y	4YM7_5_RPB5	1	RPB5	KSETSGR	201	126.127	235243	127.13	40528.3	254784	22310.9	0.0875679	11.4197	3.51345
				343	-122.679	JL033021_040221_RPA2HFH_Q2_1to2_1ug.08218.08218.3	P	1.928	0.0837369	0.496	//10	5//35	0.606	0.625	R.GEVVK[1029.55]IIR.K	4YM7_5_RPB5	1	RPB5	GEVVKIIR	197	//8	4//30	1.322	0.857143	R.K[1178.74]SETSGR.Y	4YM7_5_RPB5	1	RPB5	KSETSGR	201	126.127	53646.8	127.13	80603.2	57522.7	81556.9	1.41782	0.705308	-0.503675
				-141	50.5701	JL033021_040221_RPA2HFH_Q2_5to1_100B.07771.07771.5	P	1.886	0.0965644	0.0118	//11	6//60	0.544	0.888889	K.RGEVVK[1029.55]IIR.K	4YM7_5_RPB5	1	RPB5	RGEVVKIIR	197	//8	4//46	1.342	0.857143	R.K[1334.84]SETSGR.Y	4YM7_5_RPB5	1	RPB5	KSETSGR	201	126.128	230150	127.131	52020.4	249167	35082.9	0.140801	7.10224	2.82827
				-141	46.3878	JL033021_040221_RPA2HFH_Q2_1to2_100B.08402.08402.5	P	1.8675	0.0910221	0.0282	//11	4//60	0.371	0.444444	K.RGEVVK[1029.55]IIR.K	4YM7_5_RPB5	1	RPB5	RGEVVKIIR	197	//8	4//46	1.4965	0.857143	R.K[1334.84]SETSGR.Y	4YM7_5_RPB5	1	RPB5	KSETSGR	201	126.127	78315.8	127.13	110282	84034.1	111145	1.32262	0.756076	-0.403396
				-141	46.1554	JL033021_040221_RPA2HFH_Q2_5to1_100B.07957.07957.5	P	1.8555	0.0908312	0.58	//11	5//60	0.4015	0.5	K.RGEVVK[1029.55]IIR.K	4YM7_5_RPB5	1	RPB5	RGEVVKIIR	197	//8	4//46	1.454	0.857143	R.K[1334.84]SETSGR.Y	4YM7_5_RPB5	1	RPB5	KSETSGR	201	126.127	242714	127.13	60355	262725	42886.2	0.163236	6.12611	2.61497
				-141	50.028	JL033021_040221_RPA2HFH_Q2_1to1_100B.08642.08642.5	P	1.8535	0.0934554	0.105	//11	4//60	0.383	0.444444	K.RGEVVK[1029.55]IIR.K	4YM7_5_RPB5	1	RPB5	RGEVVKIIR	197	//8	4//46	1.4705	0.857143	R.K[1334.84]SETSGR.Y	4YM7_5_RPB5	1	RPB5	KSETSGR	201	126.127	84288.7	127.13	72523.8	90818.7	70148.3	0.7724	1.29467	0.37258
				345	-178.582	JL033021_040221_RPA2HFH_Q2_1to5_1ug.07954.07954.3	P	1.84375	0.0757156	0.0713	//10	4//35	0.51775	0.5625	R.GEVVK[1029.55]IIR.K	4YM7_5_RPB5	1	RPB5	GEVVKIIR	197	//8	4//30	1.326	0.857143	R.K[1178.74]SETSGR.Y	4YM7_5_RPB5	1	RPB5	KSETSGR	201	126.127	23764.2	127.13	91277.1	25029.2	95677.5	3.82264	0.261599	-1.93457
				-141	57.8935	JL033021_040221_RPA2HFH_Q2_1to5_100B.08293.08293.4	NP	1.71	0.0885483	0.000116	//10	3//43	0.5715	0.5	R.GEVVK[1029.55]IIR.K	4YM7_5_RPB5	1	RPB5	GEVVKIIR	197	//8	4//37	1.1385	0.857143	R.K[1178.74]SETSGR.Y	4YM7_5_RPB5	1	RPB5	KSETSGR	201	126.127	15171.7	127.13	51527.4	16034.2	53853.8	3.35869	0.297735	-1.7479
				-139	36.8309	JL033021_040221_RPA2HFH_Q2_10to1_1ug.07825.07825.4	P	1.62875	0.0806891	0.471	//10	6//43	0.67625	0.8125	R.GEVVK[1029.55]IIR.K	4YM7_5_RPB5	1	RPB5	GEVVKIIR	197	//8	4//37	0.9525	0.857143	R.K[1178.74]SETSGR.Y	4YM7_5_RPB5	1	RPB5	KSETSGR	201	126.127	124119	127.131	21577.4	134428	11979.4	0.0891136	11.2216	3.48821
				-141	56.3457	JL033021_040221_RPA2HFH_Q2_1to10_100B.08027.08027.4	NP	1.535	0.0745779	0.00093	//10	3//43	0.249	0.1875	R.GEVVK[1029.55]IIR.K	4YM7_5_RPB5	1	RPB5	GEVVKIIR	197	//8	4//37	1.286	0.857143	R.K[1178.74]SETSGR.Y	4YM7_5_RPB5	1	RPB5	KSETSGR	201	126.127	14390.4	127.13	80763.5	14949	85252.8	5.70289	0.17535	-2.51169
				348	-127.658	JL033021_040221_RPA2HFH_Q2_5to1_50B.08104.08104.3	P	1.2275	0.0509389	0.279	//10	4//35	0.4625	0.5	R.GEVVK[1029.55]IIR.K	4YM7_5_RPB5	1	RPB5	GEVVKIIR	197	//8	3//30	0.765	0.571429	R.K[1178.74]SETSGR.Y	4YM7_5_RPB5	1	RPB5	KSETSGR	201	126.127	111664	127.131	31355.2	120841	23575.3	0.195094	5.12574	2.35776
				-665	163.85	JL033021_040221_RPA2HFH_Q2_10to1_100B.07728.07728.5	P	1.11825	0.0512947	0.458	//11	7//60	0.29	0.5	K.RGEVVK[1029.55]IIR.K	4YM7_5_RPB5	1	RPB5	RGEVVKIIR	197	//8	5//46	0.82825	0.928571	R.K[1334.84]SETSGR.Y	4YM7_5_RPB5	1	RPB5	KSETSGR	201	126.127	189427	127.13	34790.2	205145	20275.2	0.0988332	10.1181	3.33886
				-141	53.8453	JL033021_040221_RPA2HFH_Q2_10to1_100B.07201.07201.4	P	0.54	0.036691	0.595	//11	1//50	0.05225	0.0555556	K.RGEVVK[1029.55]IIR.K	4YM7_5_RPB5	1	RPB5	RGEVVKIIR	197	//8	3//38	0.48775	0.357143	R.K[1334.84]SETSGR.Y	4YM7_5_RPB5	1	RPB5	KSETSGR	201	126.127	88919.7	127.13	14748.2	96310.7	7821.36	0.0812097	12.3138	3.6222
				-141	51.6147	JL033021_040221_RPA2HFH_Q2_1to5_100B.09872.09872.4	P	0.21525	0.0107916	0.666	//11	3//50	0.13	0.166667	K.RGEVVK[1029.55]IIR.K	4YM7_5_RPB5	1	RPB5	RGEVVKIIR	197	//8	2//38	0.08525	0.142857	R.K[1334.84]SETSGR.Y	4YM7_5_RPB5	1	RPB5	KSETSGR	201	126.127	31170.5	127.13	114262	32874.1	119642	3.63941	0.27477	-1.8637
	5	RPB5:161---RPB5:201	4.83025
				0	1.03314	JL033021_040221_RPA2HFH_Q2_1to2_50B.03715.03715.4	N	4.83025	0.23705		//8	10//36	3.29225	1.85714	R.K[1240.69]SETSGR.Y	4YM7_5_RPB5	1	RPB5	KSETSGR	201	//9	8//32	1.538	1.58333	R.LSSDEK[1170.65]R.E	4YM7_5_RPB5	1	RPB5	LSSDEKR	161	126.127	91494.8	127.131	146809	98029.3	149104	1.52102	0.657454	-0.605039
				0	5.4579	JL033021_040221_RPA2HFH_Q2_10to1_1ug.03541.03541.4	N	4.2775	0.234255		//8	9//36	3.25475	1.78571	R.K[1240.7]SETSGR.Y	4YM7_5_RPB5	1	RPB5	KSETSGR	201	//9	6//32	1.02275	0.833333	R.LSSDEK[1170.65]R.E	4YM7_5_RPB5	1	RPB5	LSSDEKR	161	126.127	93228.1	127.131	14657.8	100984	7337.7	0.0726621	13.7623	3.78265
				-1	5.70569	JL033021_040221_RPA2HFH_Q2_1to5_50B.03795.03795.4	N	3.6095	0.182866		//8	8//36	2.65125	1.5	R.K[1240.68]SETSGR.Y	4YM7_5_RPB5	1	RPB5	KSETSGR	201	//9	6//32	0.95825	0.833333	R.LSSDEK[1170.63]R.E	4YM7_5_RPB5	1	RPB5	LSSDEKR	161	126.127	26942.1	127.13	98503.8	28416.7	103136	3.62942	0.275526	-1.85974
				0	1.87906	JL033021_040221_RPA2HFH_Q2_2to1_1ug.03567.03567.4	N	3.45475	0.205237		//8	7//36	2.509	1.42857	R.K[1240.69]SETSGR.Y	4YM7_5_RPB5	1	RPB5	KSETSGR	201	//9	6//32	0.94575	0.833333	R.LSSDEK[1170.65]R.E	4YM7_5_RPB5	1	RPB5	LSSDEKR	161	126.127	32301.2	127.13	15511.4	34903.5	13721.9	0.393139	2.54363	1.34689
				0	1.68385	JL033021_040221_RPA2HFH_Q2_2to1_1ug.03563.03563.4	N	3.2745	0.177711		2//8	9//36	2.36975	1.57143	R.K[1240.69]SETSGR.Y	4YM7_5_RPB5	1	RPB5	KSETSGR	201	//9	5//32	0.90475	0.583333	R.LSSDEK[1170.65]R.E	4YM7_5_RPB5	1	RPB5	LSSDEKR	161	126.127	42410.5	127.13	18326	45843.8	15830.5	0.345313	2.89592	1.53402
				0	2.79004	JL033021_040221_RPA2HFH_Q2_1to2_1ug.03716.03716.4	N	3.2535	0.192072		1//8	7//36	2.29725	1.21429	R.K[1240.69]SETSGR.Y	4YM7_5_RPB5	1	RPB5	KSETSGR	201	//9	5//32	0.95625	0.583333	R.LSSDEK[1170.65]R.E	4YM7_5_RPB5	1	RPB5	LSSDEKR	161	126.127	21118.1	127.13	30490.8	22654	30777.6	1.3586	0.736054	-0.442116
				-141	60.106	JL033021_040221_RPA2HFH_Q2_1to10_50B.03761.03761.4	NP	2.1485	0.111936	0.271	//9	2//35	0.141	0.142857	R.LSSDEK[1029.55]R.E	4YM7_5_RPB5	1	RPB5	LSSDEKR	161	//8	6//36	2.0075	1.21429	R.K[1099.59]SETSGR.Y	4YM7_5_RPB5	1	RPB5	KSETSGR	201	126.127	26136.5	127.131	174488	26925	184631	6.85725	0.145831	-2.77763
				-141	61.3725	JL033021_040221_RPA2HFH_Q2_5to1_1ug.03753.03753.4	P	1.79275	0.114806	0.00181	//9	2//35	0.15575	0.142857	R.LSSDEK[1029.55]R.E	4YM7_5_RPB5	1	RPB5	LSSDEKR	161	//8	6//36	1.637	1.21429	R.K[1099.59]SETSGR.Y	4YM7_5_RPB5	1	RPB5	KSETSGR	201	126.127	39167.3	127.13	9242.57	42400.6	6388.01	0.150659	6.63752	2.73064
	6	RPB5:161---RPB5:191	0.45725
				-141	40.0057	JL033021_040221_RPA2HFH_Q2_1to5_1ug.14917.14917.4	P	0.45725	0.0176361	0.0497	//14	4//69	0.33725	0.25	R.ADPVALYLGLK[1099.59]R.G	4YM7_5_RPB5	1	RPB5	ADPVALYLGLKR	191	//9	2//33	0.12	0.142857	R.LSSDEK[1580.93]R.E	4YM7_5_RPB5	1	RPB5	LSSDEKR	161	126.127	14348.6	127.13	68313.2	15005	71915	4.79273	0.208649	-2.26085
				-141	41.268	JL033021_040221_RPA2HFH_Q2_1to5_1ug.14923.14923.5	P	0.2175	0.00760902	0.176	//14	2//85	0.07625	0.0833333	R.ADPVALYLGLK[1099.59]R.G	4YM7_5_RPB5	1	RPB5	ADPVALYLGLKR	191	//9	3//40	0.14125	0.214286	R.LSSDEK[1580.93]R.E	4YM7_5_RPB5	1	RPB5	LSSDEKR	161	126.127	22640.5	127.13	105029	23698.7	110514	4.66331	0.21444	-2.22135
	7	RPB5:161---RPB5:171	7.624
				0	2.18829	JL033021_040221_RPA2HFH_Q2_10to1_1ug.06834.06834.4	N	7.624	0.277959		//9	5//32	1.2305	0.833333	R.LSSDEK[1376.83]R.E	4YM7_5_RPB5	1	RPB5	LSSDEKR	161	//8	15//38	6.3935	3.21429	R.LK[1240.69]ESQLPR.I	4YM7_5_RPB5	1	RPB5	LKESQLPR	171	126.127	182458	127.13	33753.9	197595	19790.3	0.100156	9.98445	3.31968
				0	1.36751	JL033021_040221_RPA2HFH_Q2_2to1_50B.06442.06442.4	N	7.13275	0.259429		//9	6//32	1.54125	1.16667	R.LSSDEK[1376.83]R.E	4YM7_5_RPB5	1	RPB5	LSSDEKR	161	//8	14//38	5.5915	2.71429	R.LK[1240.69]ESQLPR.I	4YM7_5_RPB5	1	RPB5	LKESQLPR	171	126.127	410368	127.13	222975	443217	202096	0.455975	2.1931	1.13297
				0	0.274043	JL033021_040221_RPA2HFH_Q2_5to1_50B.06964.06964.4	N	6.8305	0.278489		//9	6//32	1.7375	1.16667	R.LSSDEK[1376.82]R.E	4YM7_5_RPB5	1	RPB5	LSSDEKR	161	//8	13//38	5.093	2.64286	R.LK[1240.68]ESQLPR.I	4YM7_5_RPB5	1	RPB5	LKESQLPR	171	126.127	88331.1	127.13	24611.3	95592.2	18443.3	0.192937	5.18303	2.3738
				0	2.42279	JL033021_040221_RPA2HFH_Q2_1to10_1ug.06958.06958.4	N	6.44325	0.247574		//9	6//32	1.45975	1.16667	R.LSSDEK[1376.83]R.E	4YM7_5_RPB5	1	RPB5	LSSDEKR	161	//8	14//38	4.9835	2.71429	R.LK[1240.69]ESQLPR.I	4YM7_5_RPB5	1	RPB5	LKESQLPR	171	126.127	9710.11	127.13	60973.2	10034.4	64466.1	6.42451	0.155654	-2.68359
				0	0.546735	JL033021_040221_RPA2HFH_Q2_2to1_1ug.06824.06824.4	N	6.17425	0.228228		//9	6//32	1.49275	1.16667	R.LSSDEK[1376.82]R.E	4YM7_5_RPB5	1	RPB5	LSSDEKR	161	//8	13//38	4.6815	2.5	R.LK[1240.69]ESQLPR.I	4YM7_5_RPB5	1	RPB5	LKESQLPR	171	126.127	72306.8	127.13	33513.9	78141.9	29421.7	0.376516	2.65593	1.40922
				0	0.781242	JL033021_040221_RPA2HFH_Q2_1to2_1ug.06969.06969.4	N	6.013	0.244819		//9	6//32	1.49175	1.16667	R.LSSDEK[1376.82]R.E	4YM7_5_RPB5	1	RPB5	LSSDEKR	161	//8	14//38	4.52125	2.71429	R.LK[1240.69]ESQLPR.I	4YM7_5_RPB5	1	RPB5	LKESQLPR	171	126.127	34886.7	127.13	63048.1	37320.8	64429.3	1.72636	0.579252	-0.787737
				0	0.391297	JL033021_040221_RPA2HFH_Q2_1to1_1ug.06919.06919.4	N	5.73125	0.211072		//9	5//32	1.283	0.833333	R.LSSDEK[1376.82]R.E	4YM7_5_RPB5	1	RPB5	LSSDEKR	161	//8	12//38	4.44825	2.42857	R.LK[1240.68]ESQLPR.I	4YM7_5_RPB5	1	RPB5	LKESQLPR	171	126.127	38756.8	127.13	39977.2	41705.4	39359.5	0.943749	1.0596	0.0835245
				0	3.59533	JL033021_040221_RPA2HFH_Q2_1to10_1ug.06952.06952.4	N	5.6865	0.231455		//9	5//32	1.3415	0.833333	R.LSSDEK[1376.83]R.E	4YM7_5_RPB5	1	RPB5	LSSDEKR	161	//8	14//38	4.345	2.71429	R.LK[1240.69]ESQLPR.I	4YM7_5_RPB5	1	RPB5	LKESQLPR	171	126.127	10036	127.13	68766.9	10324.4	72788.4	7.05014	0.141841	-2.81765
				0	0.781242	JL033021_040221_RPA2HFH_Q2_1to2_50B.06834.06834.4	N	5.6295	0.224453		//9	7//32	1.90875	1.5	R.LSSDEK[1376.82]R.E	4YM7_5_RPB5	1	RPB5	LSSDEKR	161	//8	12//38	3.72075	2.42857	R.LK[1240.69]ESQLPR.I	4YM7_5_RPB5	1	RPB5	LKESQLPR	171	126.127	72361.4	127.13	120539	77493.4	122672	1.58299	0.631714	-0.662656
				0	2.26737	JL033021_040221_RPA2HFH_Q2_1to5_50B.06891.06891.4	N	4.71425	0.199296		//9	7//32	1.7885	1.5	R.LSSDEK[1376.82]R.E	4YM7_5_RPB5	1	RPB5	LSSDEKR	161	//8	12//38	2.92575	2.42857	R.LK[1240.68]ESQLPR.I	4YM7_5_RPB5	1	RPB5	LKESQLPR	171	126.127	38000.3	127.131	152128	39972.9	159606	3.99285	0.250448	-1.99742
				0	1.71927	JL033021_040221_RPA2HFH_Q2_5to1_100B.06738.06738.4	N	4.25525	0.204309		//9	4//32	1.0915	0.75	R.LSSDEK[1376.83]R.E	4YM7_5_RPB5	1	RPB5	LSSDEKR	161	//8	9//38	3.16375	1.35714	R.LK[1240.69]ESQLPR.I	4YM7_5_RPB5	1	RPB5	LKESQLPR	171	126.126	69041.5	127.13	17563.6	74730.5	12622.7	0.16891	5.92031	2.56567
				-141	52.7007	JL033021_040221_RPA2HFH_Q2_1to10_50B.07017.07017.5	P	3.67375	0.139665	0.059	//8	8//49	3.5545	1.5	R.LK[1099.59]ESQLPR.I	4YM7_5_RPB5	1	RPB5	LKESQLPR	171	//9	2//42	0.11925	0.142857	R.LSSDEK[1235.72]R.E	4YM7_5_RPB5	1	RPB5	LSSDEKR	161	126.127	47018.4	127.13	309040	48476.4	326941	6.74434	0.148273	-2.75368
				-141	52.3077	JL033021_040221_RPA2HFH_Q2_1to1_50B.07056.07056.5	P	3.643	0.1513	0.246	//8	8//49	3.468	1.375	R.LK[1099.59]ESQLPR.I	4YM7_5_RPB5	1	RPB5	LKESQLPR	171	//9	3//42	0.175	0.214286	R.LSSDEK[1235.72]R.E	4YM7_5_RPB5	1	RPB5	LSSDEKR	161	126.127	124877	127.13	124231	134415	121913	0.90699	1.10255	0.140841
				-141	51.5216	JL033021_040221_RPA2HFH_Q2_1to5_1ug.06946.06946.5	P	3.5655	0.148229	0.00644	//8	8//49	3.3815	1.5	R.LK[1099.59]ESQLPR.I	4YM7_5_RPB5	1	RPB5	LKESQLPR	171	//9	3//42	0.184	0.357143	R.LSSDEK[1235.72]R.E	4YM7_5_RPB5	1	RPB5	LSSDEKR	161	126.128	30838.8	127.131	117324	32489.5	122954	3.78442	0.264241	-1.92007
				-141	54.6257	JL033021_040221_RPA2HFH_Q2_10to1_50B.06920.06920.4	NP	3.26025	0.127373	0.000127	//8	8//41	3.1515	1.375	R.LK[1099.59]ESQLPR.I	4YM7_5_RPB5	1	RPB5	LKESQLPR	171	//9	2//35	0.10875	0.142857	R.LSSDEK[1235.72]R.E	4YM7_5_RPB5	1	RPB5	LSSDEKR	161	126.127	99241.3	127.131	20153.9	107460	12687.4	0.118066	8.46985	3.08234
				-141	53.6195	JL033021_040221_RPA2HFH_Q2_5to1_1ug.06922.06922.4	NP	3.07925	0.116501	0.00226	//8	8//41	2.972	1.375	R.LK[1099.59]ESQLPR.I	4YM7_5_RPB5	1	RPB5	LKESQLPR	171	//9	2//35	0.10725	0.142857	R.LSSDEK[1235.72]R.E	4YM7_5_RPB5	1	RPB5	LSSDEKR	161	126.127	105550	127.131	26365.4	114251	18777.1	0.164349	6.0846	2.60516
				-141	52.1101	JL033021_040221_RPA2HFH_Q2_2to1_100B.06778.06778.4	NP	3.07675	0.130098	0.319	//8	8//41	2.9695	1.375	R.LK[1099.59]ESQLPR.I	4YM7_5_RPB5	1	RPB5	LKESQLPR	171	//9	2//35	0.10725	0.142857	R.LSSDEK[1235.72]R.E	4YM7_5_RPB5	1	RPB5	LSSDEKR	161	126.127	67540.3	127.131	32909.8	72977.7	29202.3	0.400154	2.49904	1.32137
				-141	53.1163	JL033021_040221_RPA2HFH_Q2_2to1_100B.06771.06771.4	NP	2.81375	0.130887	0.503	//8	7//41	2.70425	1.3125	R.LK[1099.59]ESQLPR.I	4YM7_5_RPB5	1	RPB5	LKESQLPR	171	//9	2//35	0.1095	0.142857	R.LSSDEK[1235.72]R.E	4YM7_5_RPB5	1	RPB5	LSSDEKR	161	126.127	60379.5	127.13	29409.4	65240.5	26094.1	0.399968	2.5002	1.32204
				-141	50.8524	JL033021_040221_RPA2HFH_Q2_1to1_50B.07038.07038.4	NP	2.70975	0.103784	5.47e-05	//8	8//41	2.579	1.375	R.LK[1099.59]ESQLPR.I	4YM7_5_RPB5	1	RPB5	LKESQLPR	171	//9	2//35	0.13075	0.142857	R.LSSDEK[1235.72]R.E	4YM7_5_RPB5	1	RPB5	LSSDEKR	161	126.127	52501	127.131	56920.8	56472.8	56282.1	0.996624	1.00339	0.00487943
				-141	52.3617	JL033021_040221_RPA2HFH_Q2_1to5_100B.07169.07169.4	NP	2.51225	0.119854	0.0766	//8	9//41	2.42525	1.4375	R.LK[1099.59]ESQLPR.I	4YM7_5_RPB5	1	RPB5	LKESQLPR	171	//9	2//35	0.087	0.142857	R.LSSDEK[1235.72]R.E	4YM7_5_RPB5	1	RPB5	LSSDEKR	161	126.127	10853.1	127.13	39614.4	11447.7	41475.7	3.62307	0.276009	-1.85721
				-141	51.2297	JL033021_040221_RPA2HFH_Q2_1to10_50B.06996.06996.4	NP	2.40325	0.102696	0.0533	//8	8//41	2.247	1.375	R.LK[1099.59]ESQLPR.I	4YM7_5_RPB5	1	RPB5	LKESQLPR	171	//9	3//35	0.15625	0.214286	R.LSSDEK[1235.72]R.E	4YM7_5_RPB5	1	RPB5	LSSDEKR	161	126.127	28035.3	127.131	208407	28708.3	220808	7.69144	0.130015	-2.94325
	8	RPB5:171---RPB5:24	2.98575
				-141	57.9263	JL033021_040221_RPA2HFH_Q2_1to10_50B.06833.06833.4	P	2.98575	0.118208	0.217	//8	7//40	2.639	1.3125	R.LK[1058.54]ESQLPR.I	4YM7_5_RPB5	1	RPB5	LKESQLPR	171	1//8	3//30	0.34675	0.416667	K.EM[147.04]VK[1235.72]DR.G	4YM7_5_RPB5	1	RPB5	EMVKDR	24	126.127	17156.2	127.13	97954	17808.6	103426	5.80761	0.172188	-2.53794
				-143	59.0185	JL033021_040221_RPA2HFH_Q2_1to10_50B.06811.06811.4	P	2.6405	0.111618	0.45	//8	6//40	2.3725	1.25	R.LK[1058.54]ESQLPR.I	4YM7_5_RPB5	1	RPB5	LKESQLPR	171	1//8	3//30	0.268	0.416667	K.EM[147.04]VK[1235.72]DR.G	4YM7_5_RPB5	1	RPB5	EMVKDR	24	126.127	16949.3	127.13	97756.2	17585.9	103232	5.87016	0.170353	-2.5534
	9	RPB5:171---RPB5:191	1.4155
				-141	40.2884	JL033021_040221_RPA2HFH_Q2_2to1_50B.15081.15081.5	P	1.4155	0.0477782	0.294	//14	3//84	0.11525	0.125	R.ADPVALYLGLK[1235.72]R.G	4YM7_5_RPB5	1	RPB5	ADPVALYLGLKR	191	2//8	6//46	1.30025	0.8125	R.LK[1580.93]ESQLPR.I	4YM7_5_RPB5	1	RPB5	LKESQLPR	171	126.127	61948.1	127.13	29498.6	66940.9	26048.9	0.389133	2.56981	1.36166
	10	RPB5:171---RPB5:201	4.756
				-1	4.02429	JL033021_040221_RPA2HFH_Q2_10to1_100B.05740.05740.4	N	4.756	0.245452		//8	5//36	1.22575	0.928571	R.K[1376.81]SETSGR.Y	4YM7_5_RPB5	1	RPB5	KSETSGR	201	//8	11//38	3.53025	1.92857	R.LK[1170.64]ESQLPR.I	4YM7_5_RPB5	1	RPB5	LKESQLPR	171	126.127	70822.9	127.13	12447.7	76704.1	6980.78	0.0910092	10.9879	3.45784
				-141	54.9062	JL033021_040221_RPA2HFH_Q2_1to5_50B.05927.05927.4	NP	3.70775	0.144467	6.21e-16	//8	6//40	2.07275	0.875	R.LK[1029.55]ESQLPR.I	4YM7_5_RPB5	1	RPB5	LKESQLPR	171	//8	6//38	1.635	1.42857	R.K[1235.72]SETSGR.Y	4YM7_5_RPB5	1	RPB5	KSETSGR	201	126.127	69140.4	127.13	241544	73016.1	252628	3.45989	0.289027	-1.79073
				-141	53.9928	JL033021_040221_RPA2HFH_Q2_2to1_50B.05452.05452.4	NP	3.707	0.154048	1.99e-13	//8	5//40	2.059	0.8125	R.LK[1029.55]ESQLPR.I	4YM7_5_RPB5	1	RPB5	LKESQLPR	171	1//8	7//38	1.648	1.5	R.K[1235.72]SETSGR.Y	4YM7_5_RPB5	1	RPB5	KSETSGR	201	126.127	215822	127.13	107375	233179	95686.1	0.410355	2.43691	1.28506
				-141	59.147	JL033021_040221_RPA2HFH_Q2_1to1_50B.06034.06034.4	NP	3.65	0.16957	1.23e-23	//8	7//40	2.136	1.0625	R.LK[1029.55]ESQLPR.I	4YM7_5_RPB5	1	RPB5	LKESQLPR	171	//8	6//38	1.514	1.42857	R.K[1235.72]SETSGR.Y	4YM7_5_RPB5	1	RPB5	KSETSGR	201	126.127	61690.6	127.13	53734.7	66464.5	52042.9	0.783019	1.27711	0.352882
				-141	55.0367	JL033021_040221_RPA2HFH_Q2_1to2_50B.05849.05849.4	NP	3.499	0.153441	3.81e-10	//8	6//40	2.008	0.875	R.LK[1029.55]ESQLPR.I	4YM7_5_RPB5	1	RPB5	LKESQLPR	171	//8	5//38	1.491	1.14286	R.K[1235.72]SETSGR.Y	4YM7_5_RPB5	1	RPB5	KSETSGR	201	126.127	67396.8	127.131	106996	72219.5	108604	1.50381	0.664978	-0.588621
				-141	54.841	JL033021_040221_RPA2HFH_Q2_10to1_1ug.05763.05763.4	NP	3.46475	0.153219	4.64e-07	//8	6//40	1.99675	0.875	R.LK[1029.55]ESQLPR.I	4YM7_5_RPB5	1	RPB5	LKESQLPR	171	//8	6//38	1.468	1.42857	R.K[1235.72]SETSGR.Y	4YM7_5_RPB5	1	RPB5	KSETSGR	201	126.127	127430	127.131	21842.3	138016	11966	0.0867001	11.534	3.52782
				-141	54.3843	JL033021_040221_RPA2HFH_Q2_1to10_50B.05986.05986.4	NP	3.43625	0.148332	1.93e-10	//8	6//40	1.91875	0.875	R.LK[1029.55]ESQLPR.I	4YM7_5_RPB5	1	RPB5	LKESQLPR	171	//8	6//38	1.5175	1.42857	R.K[1235.72]SETSGR.Y	4YM7_5_RPB5	1	RPB5	KSETSGR	201	126.127	34350.1	127.13	197513	35645.2	208567	5.85121	0.170905	-2.54873
				-141	53.9276	JL033021_040221_RPA2HFH_Q2_10to1_50B.05882.05882.4	NP	3.39125	0.156095	1.76e-19	//8	6//40	1.909	0.875	R.LK[1029.55]ESQLPR.I	4YM7_5_RPB5	1	RPB5	LKESQLPR	171	//8	6//38	1.48225	1.21429	R.K[1235.72]SETSGR.Y	4YM7_5_RPB5	1	RPB5	KSETSGR	201	126.127	87096.6	127.13	14439.4	94336.1	7654.12	0.0811367	12.3249	3.6235
				-141	56.0153	JL033021_040221_RPA2HFH_Q2_5to1_1ug.05832.05832.4	NP	3.29875	0.149184	2.84e-18	//8	6//40	1.8615	0.875	R.LK[1029.55]ESQLPR.I	4YM7_5_RPB5	1	RPB5	LKESQLPR	171	//8	6//38	1.43725	1.21429	R.K[1235.72]SETSGR.Y	4YM7_5_RPB5	1	RPB5	KSETSGR	201	126.127	69755.9	127.13	15815.9	75519.4	10685.9	0.141498	7.06723	2.82114
				-141	58.5598	JL033021_040221_RPA2HFH_Q2_1to1_1ug.05861.05861.4	NP	3.23	0.147934	2.76e-09	//8	6//40	2.1115	0.875	R.LK[1029.55]ESQLPR.I	4YM7_5_RPB5	1	RPB5	LKESQLPR	171	//8	4//38	1.1185	0.857143	R.K[1235.72]SETSGR.Y	4YM7_5_RPB5	1	RPB5	KSETSGR	201	126.127	39339.5	127.131	35327.4	42375.1	34324.6	0.810017	1.23454	0.303976
				-141	62.8658	JL033021_040221_RPA2HFH_Q2_1to2_100B.05913.05913.4	NP	3.062	0.181124	3.04e-05	//8	6//40	1.451	0.875	R.LK[1029.55]ESQLPR.I	4YM7_5_RPB5	1	RPB5	LKESQLPR	171	//8	5//38	1.611	1.14286	R.K[1235.72]SETSGR.Y	4YM7_5_RPB5	1	RPB5	KSETSGR	201	126.127	26948.8	127.13	39175.8	28906.5	39560.8	1.36858	0.730686	-0.452676
				-141	54.5147	JL033021_040221_RPA2HFH_Q2_5to1_50B.05884.05884.4	NP	2.90125	0.153408	7.35e-13	//8	5//40	1.88575	0.8125	R.LK[1029.55]ESQLPR.I	4YM7_5_RPB5	1	RPB5	LKESQLPR	171	//8	5//38	1.0155	0.928571	R.K[1235.72]SETSGR.Y	4YM7_5_RPB5	1	RPB5	KSETSGR	201	126.127	83727	127.13	20258.9	90634.6	14192.7	0.156593	6.386	2.67491
				-142	56.0153	JL033021_040221_RPA2HFH_Q2_1to2_1ug.05955.05955.4	NP	2.896	0.143242	0.00147	//8	6//40	1.8815	0.875	R.LK[1029.55]ESQLPR.I	4YM7_5_RPB5	1	RPB5	LKESQLPR	171	//8	4//38	1.0145	0.857143	R.K[1235.72]SETSGR.Y	4YM7_5_RPB5	1	RPB5	KSETSGR	201	126.127	22560.2	127.13	32962.2	24197.8	33296.4	1.37601	0.72674	-0.460489
				-141	59.4732	JL033021_040221_RPA2HFH_Q2_2to1_100B.05819.05819.4	NP	2.85	0.153094	0.0967	//8	6//40	1.7715	0.875	R.LK[1029.55]ESQLPR.I	4YM7_5_RPB5	1	RPB5	LKESQLPR	171	//8	4//38	1.0785	0.857143	R.K[1235.72]SETSGR.Y	4YM7_5_RPB5	1	RPB5	KSETSGR	201	126.127	51756.6	127.13	23257	55939.3	20275.4	0.362454	2.75897	1.46413
				-141	52.5575	JL033021_040221_RPA2HFH_Q2_2to1_1ug.05772.05772.4	NP	2.741	0.121031	1.92e-05	//8	6//40	1.8735	0.875	R.LK[1029.55]ESQLPR.I	4YM7_5_RPB5	1	RPB5	LKESQLPR	171	//8	4//38	0.8675	0.857143	R.K[1235.72]SETSGR.Y	4YM7_5_RPB5	1	RPB5	KSETSGR	201	126.127	60729.8	127.13	28433.2	65628.3	25016.6	0.381186	2.62339	1.39143
				-141	55.8196	JL033021_040221_RPA2HFH_Q2_1to10_100B.06248.06248.4	P	2.72775	0.1961	0.000127	//8	5//40	1.84725	0.8125	R.LK[1029.55]ESQLPR.I	4YM7_5_RPB5	1	RPB5	LKESQLPR	171	//8	4//38	0.8805	0.857143	R.K[1235.72]SETSGR.Y	4YM7_5_RPB5	1	RPB5	KSETSGR	201	126.127	5905.02	127.13	31439.6	6148.1	33160	5.39354	0.185407	-2.43123
				-142	48.5776	JL033021_040221_RPA2HFH_Q2_1to10_50B.06116.06116.4	NP	2.72075	0.131886	0.000382	//8	8//40	1.80975	1	R.LK[1029.55]ESQLPR.I	4YM7_5_RPB5	1	RPB5	LKESQLPR	171	//8	4//38	0.911	0.857143	R.K[1235.72]SETSGR.Y	4YM7_5_RPB5	1	RPB5	KSETSGR	201	126.126	20018.5	127.13	125373	20689.7	132550	6.40658	0.15609	-2.67955
				-142	50.8611	JL033021_040221_RPA2HFH_Q2_1to5_1ug.05940.05940.4	NP	2.71125	0.130754	5.71e-09	//8	6//40	1.86475	0.875	R.LK[1029.55]ESQLPR.I	4YM7_5_RPB5	1	RPB5	LKESQLPR	171	//8	4//38	0.8465	0.857143	R.K[1235.72]SETSGR.Y	4YM7_5_RPB5	1	RPB5	KSETSGR	201	126.126	14414.7	127.13	49996.4	15225.7	52281.2	3.43375	0.291227	-1.77978
				-139	52.5575	JL033021_040221_RPA2HFH_Q2_1to2_100B.05907.05907.4	P	2.55875	0.179921	0.00131	//8	5//40	1.72725	0.8125	R.LK[1029.55]ESQLPR.I	4YM7_5_RPB5	1	RPB5	LKESQLPR	171	//8	4//38	0.8315	0.642857	R.K[1235.72]SETSGR.Y	4YM7_5_RPB5	1	RPB5	KSETSGR	201	126.127	23403.6	127.13	34569.3	25099.3	34942.8	1.39218	0.718297	-0.477347
				-141	59.2122	JL033021_040221_RPA2HFH_Q2_1to10_1ug.05901.05901.4	NP	2.398	0.123844	6e-06	//8	7//40	1.5565	0.9375	R.LK[1029.55]ESQLPR.I	4YM7_5_RPB5	1	RPB5	LKESQLPR	171	//8	4//38	0.8415	0.857143	R.K[1235.72]SETSGR.Y	4YM7_5_RPB5	1	RPB5	KSETSGR	201	126.127	5274.3	127.13	39052.7	5402.18	41374.7	7.65888	0.130567	-2.93713
				-142	50.8611	JL033021_040221_RPA2HFH_Q2_1to5_50B.06047.06047.4	NP	2.3675	0.110908	0.0143	//8	6//40	1.4635	0.875	R.LK[1029.55]ESQLPR.I	4YM7_5_RPB5	1	RPB5	LKESQLPR	171	//8	4//38	0.904	0.857143	R.K[1235.72]SETSGR.Y	4YM7_5_RPB5	1	RPB5	KSETSGR	201	126.127	34238.8	127.131	120903	36147.6	126483	3.49908	0.285789	-1.80698
	11	RPB5:171---RPB5:197	4.47725
				0	3.52728	JL033021_040221_RPA2HFH_Q2_10to1_1ug.10638.10638.4	N	4.47725	0.164294		//10	7//39	1.28225	1.21429	R.GEVVK[1376.81]IIR.K	4YM7_5_RPB5	1	RPB5	GEVVKIIR	197	//8	9//38	3.195	2	R.LK[1319.83]ESQLPR.I	4YM7_5_RPB5	1	RPB5	LKESQLPR	171	126.127	141024	127.13	26646	152719	15893.2	0.104068	9.60907	3.2644
				-141	49.4699	JL033021_040221_RPA2HFH_Q2_1to2_50B.10272.10272.4	NP	4.0885	0.140873	3e-05	//8	7//41	3.07975	1.3125	R.LK[1178.74]ESQLPR.I	4YM7_5_RPB5	1	RPB5	LKESQLPR	171	//10	7//43	1.00875	0.75	R.GEVVK[1235.72]IIR.K	4YM7_5_RPB5	1	RPB5	GEVVKIIR	197	126.127	82413	127.13	143748	88205.2	146639	1.66247	0.601513	-0.733331
				-141	50.5359	JL033021_040221_RPA2HFH_Q2_5to1_50B.10665.10665.5	P	4.04825	0.165844	0.0224	//8	8//49	3.309	1.375	R.LK[1178.74]ESQLPR.I	4YM7_5_RPB5	1	RPB5	LKESQLPR	171	//10	4//51	0.73925	0.5625	R.GEVVK[1235.72]IIR.K	4YM7_5_RPB5	1	RPB5	GEVVKIIR	197	126.127	124165	127.13	31246.4	134399	22336.4	0.166195	6.01704	2.58905
				-141	47.6572	JL033021_040221_RPA2HFH_Q2_5to1_50B.10662.10662.4	NP	3.91975	0.140334	2.46e-09	//8	9//41	3.025	1.4375	R.LK[1178.74]ESQLPR.I	4YM7_5_RPB5	1	RPB5	LKESQLPR	171	//10	6//43	0.89475	0.6875	R.GEVVK[1235.72]IIR.K	4YM7_5_RPB5	1	RPB5	GEVVKIIR	197	126.127	154685	127.13	42311.3	167407	31453.4	0.187886	5.32239	2.41207
				-141	48.8657	JL033021_040221_RPA2HFH_Q2_2to1_50B.09920.09920.4	NP	3.768	0.138785	8.17e-06	//8	6//41	2.846	1.25	R.LK[1178.74]ESQLPR.I	4YM7_5_RPB5	1	RPB5	LKESQLPR	171	//10	6//43	0.922	0.8125	R.GEVVK[1235.72]IIR.K	4YM7_5_RPB5	1	RPB5	GEVVKIIR	197	126.127	177909	127.13	88304.2	192218	78653.8	0.40919	2.44385	1.28916
				-141	47.4155	JL033021_040221_RPA2HFH_Q2_1to10_50B.10500.10500.4	NP	3.17225	0.111198	0.000209	//8	5//41	2.2885	1	R.LK[1178.74]ESQLPR.I	4YM7_5_RPB5	1	RPB5	LKESQLPR	171	//10	6//43	0.88375	0.6875	R.GEVVK[1235.72]IIR.K	4YM7_5_RPB5	1	RPB5	GEVVKIIR	197	126.127	30711.2	127.13	223765	31485.3	237025	7.52811	0.132835	-2.91229
				-141	48.7448	JL033021_040221_RPA2HFH_Q2_1to5_50B.10426.10426.4	NP	3.10575	0.105249	0.0105	//8	6//41	2.3415	1.0625	R.LK[1178.74]ESQLPR.I	4YM7_5_RPB5	1	RPB5	LKESQLPR	171	//10	6//43	0.76425	0.6875	R.GEVVK[1235.72]IIR.K	4YM7_5_RPB5	1	RPB5	GEVVKIIR	197	126.127	58356.6	127.13	229416	61420	240599	3.91728	0.255279	-1.96985
				-141	47.3148	JL033021_040221_RPA2HFH_Q2_10to1_100B.10248.10248.5	P	2.83475	0.141645	0.366	//11	2//59	0.193	0.111111	K.RGEVVK[1235.72]IIR.K	4YM7_5_RPB5	1	RPB5	RGEVVKIIR	197	//8	8//48	2.64175	1.375	R.LK[1334.84]ESQLPR.I	4YM7_5_RPB5	1	RPB5	LKESQLPR	171	126.127	56084.1	127.13	9814.41	60741.7	5482.11	0.0902528	11.08	3.46988
				-141	53.3371	JL033021_040221_RPA2HFH_Q2_1to1_50B.10770.10770.4	NP	1.6855	0.0630223	5.45e-09	//8	4//41	0.8485	0.5	R.LK[1178.74]ESQLPR.I	4YM7_5_RPB5	1	RPB5	LKESQLPR	171	//10	6//43	0.837	0.6875	R.GEVVK[1235.72]IIR.K	4YM7_5_RPB5	1	RPB5	GEVVKIIR	197	126.127	65830.7	127.131	70711.1	70816.2	69862.9	0.986538	1.01365	0.0195538
5	RPA2
	1	RPA2:441---RPA2:77	11.9987
				-141	26.0882	JL033021_040221_RPA2HFH_Q2_2to1_50B.13072.13072.4	NP	11.9987	0.332219	0.000209	//12	26//136	10.7368	1.56522	K.VIFDGK[1460.78]PLNSEDEISNSGYLGNK.L	4YM7_2_RPA2	1	RPA2	VIFDGKPLNSEDEISNSGYLGNK	77	//12	8//51	1.262	1.05	R.GM[147.04]AINFK[2761.38]DKR.Y	4YM7_2_RPA2	1	RPA2	GMAINFKDKR	441	126.127	162890	127.131	79465.6	176002	70530.8	0.400738	2.4954	1.31927
				-141	26.5346	JL033021_040221_RPA2HFH_Q2_5to1_50B.13679.13679.4	P	10.4358	0.306988	5.69e-05	//12	23//136	9.59825	1.5	K.VIFDGK[1460.78]PLNSEDEISNSGYLGNK.L	4YM7_2_RPA2	1	RPA2	VIFDGKPLNSEDEISNSGYLGNK	77	//12	7//51	0.8375	0.7	R.GM[147.04]AINFK[2761.38]DKR.Y	4YM7_2_RPA2	1	RPA2	GMAINFKDKR	441	126.127	69616.6	127.131	18318.8	75348	13380.4	0.177582	5.63121	2.49344
				-141	25.7055	JL033021_040221_RPA2HFH_Q2_1to2_50B.13245.13245.4	NP	10.204	0.288293	0.0415	//12	22//136	9.23475	1.36957	K.VIFDGK[1460.78]PLNSEDEISNSGYLGNK.L	4YM7_2_RPA2	1	RPA2	VIFDGKPLNSEDEISNSGYLGNK	77	//12	7//51	0.96925	0.7	R.GM[147.04]AINFK[2761.38]DKR.Y	4YM7_2_RPA2	1	RPA2	GMAINFKDKR	441	126.127	54489.1	127.131	81011.2	58432.8	81918.5	1.40193	0.713305	-0.487409
				-438	74.8279	JL033021_040221_RPA2HFH_Q2_1to1_50B.14397.14397.5	P	10.034	0.273276	6.63e-05	//12	27//184	9.98275	1.73913	K.VIFDGK[1460.78]PLNSEDEISNSGYLGNK.L	4YM7_2_RPA2	1	RPA2	VIFDGKPLNSEDEISNSGYLGNK	77	//12	2//65	0.05125	0.1	R.GM[147.04]AINFK[2761.38]DKR.Y	4YM7_2_RPA2	1	RPA2	GMAINFKDKR	441	126.127	141471	127.13	217500	151652	220369	1.45312	0.688175	-0.539153
				-141	29.6598	JL033021_040221_RPA2HFH_Q2_1to5_50B.13440.13440.4	NP	9.89425	0.29758	0.333	//12	21//136	8.7095	1.34783	K.VIFDGK[1460.78]PLNSEDEISNSGYLGNK.L	4YM7_2_RPA2	1	RPA2	VIFDGKPLNSEDEISNSGYLGNK	77	1//12	7//51	1.18475	0.7	R.GM[147.04]AINFK[2761.38]DKR.Y	4YM7_2_RPA2	1	RPA2	GMAINFKDKR	441	126.127	20937	127.131	80755.3	22048.7	84656.4	3.83952	0.260449	-1.94092
				-141	26.4708	JL033021_040221_RPA2HFH_Q2_1to1_1ug.13685.13685.4	NP	9.8675	0.302336	0.0341	//12	20//136	9.20525	1.30435	K.VIFDGK[1460.78]PLNSEDEISNSGYLGNK.L	4YM7_2_RPA2	1	RPA2	VIFDGKPLNSEDEISNSGYLGNK	77	//12	5//51	0.66225	0.45	R.GM[147.04]AINFK[2761.38]DKR.Y	4YM7_2_RPA2	1	RPA2	GMAINFKDKR	441	126.127	33323.5	127.131	31849.2	35879.3	31137.5	0.867841	1.15229	0.204498
				-141	27.5197	JL033021_040221_RPA2HFH_Q2_1to2_50B.13244.13244.5	NP	9.79825	0.259103	0.00146	//12	25//184	8.97325	1.45652	K.VIFDGK[1460.78]PLNSEDEISNSGYLGNK.L	4YM7_2_RPA2	1	RPA2	VIFDGKPLNSEDEISNSGYLGNK	77	//12	5//65	0.825	0.6	R.GM[147.04]AINFK[2761.38]DKR.Y	4YM7_2_RPA2	1	RPA2	GMAINFKDKR	441	126.127	110194	127.13	182140	118021	185285	1.56994	0.636968	-0.650707
				-141	32.7815	JL033021_040221_RPA2HFH_Q2_1to1_50B.13755.13755.5	NP	9.6945	0.293911	1.96e-08	//12	20//184	8.81325	1.34783	K.VIFDGK[1460.78]PLNSEDEISNSGYLGNK.L	4YM7_2_RPA2	1	RPA2	VIFDGKPLNSEDEISNSGYLGNK	77	//12	6//65	0.88125	0.65	R.GM[147.04]AINFK[2761.38]DKR.Y	4YM7_2_RPA2	1	RPA2	GMAINFKDKR	441	126.127	35080.7	127.13	33045	37775.2	32261.1	0.85403	1.17092	0.227642
				-438	76.7413	JL033021_040221_RPA2HFH_Q2_1to1_50B.14376.14376.5	P	9.68775	0.303335	0.00284	//12	25//184	9.54575	1.56522	K.VIFDGK[1460.78]PLNSEDEISNSGYLGNK.L	4YM7_2_RPA2	1	RPA2	VIFDGKPLNSEDEISNSGYLGNK	77	//12	3//65	0.142	0.25	R.GM[147.04]AINFK[2761.38]DKR.Y	4YM7_2_RPA2	1	RPA2	GMAINFKDKR	441	126.127	59331.1	127.13	79043.2	63699.9	79374.9	1.24608	0.802519	-0.317393
				-141	27.3603	JL033021_040221_RPA2HFH_Q2_1to1_1ug.13652.13652.5	P	9.673	0.253137	0.000762	//12	23//184	8.8785	1.41304	K.VIFDGK[1460.78]PLNSEDEISNSGYLGNK.L	4YM7_2_RPA2	1	RPA2	VIFDGKPLNSEDEISNSGYLGNK	77	//12	5//65	0.7945	0.6	R.GM[147.04]AINFK[2761.38]DKR.Y	4YM7_2_RPA2	1	RPA2	GMAINFKDKR	441	126.127	58862.6	127.13	54280.2	63393.2	52881.4	0.83418	1.19878	0.261569
				-141	30.3101	JL033021_040221_RPA2HFH_Q2_1to10_50B.13522.13522.5	NP	9.661	0.259297	5.51e-06	//12	25//184	8.8675	1.45652	K.VIFDGK[1460.78]PLNSEDEISNSGYLGNK.L	4YM7_2_RPA2	1	RPA2	VIFDGKPLNSEDEISNSGYLGNK	77	//12	5//65	0.7935	0.6	R.GM[147.04]AINFK[2761.38]DKR.Y	4YM7_2_RPA2	1	RPA2	GMAINFKDKR	441	126.127	31141.9	127.13	193628	32197.6	204693	6.35739	0.157297	-2.66843
				-141	31.0276	JL033021_040221_RPA2HFH_Q2_5to1_50B.13672.13672.5	NP	9.585	0.261928	0.000131	//12	23//184	8.7635	1.41304	K.VIFDGK[1460.78]PLNSEDEISNSGYLGNK.L	4YM7_2_RPA2	1	RPA2	VIFDGKPLNSEDEISNSGYLGNK	77	//12	6//65	0.8215	0.65	R.GM[147.04]AINFK[2761.38]DKR.Y	4YM7_2_RPA2	1	RPA2	GMAINFKDKR	441	126.127	89645.4	127.13	24435.7	97018.9	18137.1	0.186944	5.34919	2.41932
				-141	27.9184	JL033021_040221_RPA2HFH_Q2_5to1_1ug.13705.13705.5	P	9.53	0.229855	6.09e-09	//12	22//184	8.72225	1.3913	K.VIFDGK[1460.78]PLNSEDEISNSGYLGNK.L	4YM7_2_RPA2	1	RPA2	VIFDGKPLNSEDEISNSGYLGNK	77	//12	6//65	0.80775	0.65	R.GM[147.04]AINFK[2761.38]DKR.Y	4YM7_2_RPA2	1	RPA2	GMAINFKDKR	441	126.127	115897	127.13	28913.5	125452	20578.8	0.164037	6.09617	2.6079
				-438	74.4293	JL033021_040221_RPA2HFH_Q2_1to5_1ug.14408.14408.5	P	9.468	0.272704	0.00251	//12	24//184	9.32825	1.54348	K.VIFDGK[1460.78]PLNSEDEISNSGYLGNK.L	4YM7_2_RPA2	1	RPA2	VIFDGKPLNSEDEISNSGYLGNK	77	//12	3//65	0.13975	0.25	R.GM[147.04]AINFK[2761.38]DKR.Y	4YM7_2_RPA2	1	RPA2	GMAINFKDKR	441	126.127	37644.7	127.13	217467	39055.8	229654	5.88015	0.170064	-2.55585
				-141	31.5857	JL033021_040221_RPA2HFH_Q2_1to10_1ug.13790.13790.5	P	9.4645	0.240012	0.00128	//12	20//184	8.68	1.23913	K.VIFDGK[1460.78]PLNSEDEISNSGYLGNK.L	4YM7_2_RPA2	1	RPA2	VIFDGKPLNSEDEISNSGYLGNK	77	//12	5//65	0.7845	0.6	R.GM[147.04]AINFK[2761.38]DKR.Y	4YM7_2_RPA2	1	RPA2	GMAINFKDKR	441	126.127	12384.4	127.13	85851.3	12732.2	90884.8	7.13817	0.140092	-2.83555
				-141	30.3614	JL033021_040221_RPA2HFH_Q2_1to10_50B.13512.13512.4	NP	9.24125	0.277311	0.000747	//12	19//136	8.05025	1.21739	K.VIFDGK[1460.78]PLNSEDEISNSGYLGNK.L	4YM7_2_RPA2	1	RPA2	VIFDGKPLNSEDEISNSGYLGNK	77	//12	6//51	1.191	0.65	R.GM[147.04]AINFK[2761.38]DKR.Y	4YM7_2_RPA2	1	RPA2	GMAINFKDKR	441	126.127	13064.8	127.131	73799.8	13568.2	77909.6	5.7421	0.174152	-2.52158
				-438	75.1468	JL033021_040221_RPA2HFH_Q2_1to10_50B.14190.14190.5	P	9.19575	0.25448	0.0157	//12	26//184	9.1255	1.63043	K.VIFDGK[1460.78]PLNSEDEISNSGYLGNK.L	4YM7_2_RPA2	1	RPA2	VIFDGKPLNSEDEISNSGYLGNK	77	//12	3//65	0.07025	0.15	R.GM[147.04]AINFK[2761.38]DKR.Y	4YM7_2_RPA2	1	RPA2	GMAINFKDKR	441	126.127	63741.1	127.13	664962	63716.8	706839	11.0934	0.0901433	-3.47164
				-141	28.7156	JL033021_040221_RPA2HFH_Q2_1to2_1ug.13757.13757.5	P	9.1905	0.226253	3.96e-05	//12	21//184	8.5995	1.36957	K.VIFDGK[1460.78]PLNSEDEISNSGYLGNK.L	4YM7_2_RPA2	1	RPA2	VIFDGKPLNSEDEISNSGYLGNK	77	//12	4//65	0.591	0.4	R.GM[147.04]AINFK[2761.38]DKR.Y	4YM7_2_RPA2	1	RPA2	GMAINFKDKR	441	126.128	45358.6	127.131	70223.7	48618.8	71178.4	1.46401	0.683056	-0.549925
				-141	27.2008	JL033021_040221_RPA2HFH_Q2_2to1_50B.13055.13055.5	NP	8.966	0.248555	0.0241	//12	20//184	8.11275	1.34783	K.VIFDGK[1460.78]PLNSEDEISNSGYLGNK.L	4YM7_2_RPA2	1	RPA2	VIFDGKPLNSEDEISNSGYLGNK	77	//12	6//65	0.85325	0.65	R.GM[147.04]AINFK[2761.38]DKR.Y	4YM7_2_RPA2	1	RPA2	GMAINFKDKR	441	126.127	201160	127.13	95776.1	217373	84573.2	0.389069	2.57024	1.3619
				-438	73.8713	JL033021_040221_RPA2HFH_Q2_10to1_50B.14576.14576.5	P	8.83925	0.258476	0.0143	//12	25//184	8.68275	1.54348	K.VIFDGK[1460.78]PLNSEDEISNSGYLGNK.L	4YM7_2_RPA2	1	RPA2	VIFDGKPLNSEDEISNSGYLGNK	77	//12	3//65	0.1565	0.25	R.GM[147.04]AINFK[2761.38]DKR.Y	4YM7_2_RPA2	1	RPA2	GMAINFKDKR	441	126.127	153929	127.131	34750.8	166648	23419.7	0.140534	7.11574	2.83101
				-438	74.1902	JL033021_040221_RPA2HFH_Q2_1to10_1ug.14466.14466.5	P	8.784	0.25865	0.383	//12	21//184	8.72975	1.41304	K.VIFDGK[1460.78]PLNSEDEISNSGYLGNK.L	4YM7_2_RPA2	1	RPA2	VIFDGKPLNSEDEISNSGYLGNK	77	//12	2//65	0.05425	0.1	R.GM[147.04]AINFK[2761.38]DKR.Y	4YM7_2_RPA2	1	RPA2	GMAINFKDKR	441	126.127	21481.8	127.13	211236	21578.2	224429	10.4007	0.0961473	-3.37861
				-438	73.6321	JL033021_040221_RPA2HFH_Q2_1to1_1ug.14308.14308.5	P	8.7685	0.258803	0.241	//12	24//184	8.7075	1.47826	K.VIFDGK[1460.78]PLNSEDEISNSGYLGNK.L	4YM7_2_RPA2	1	RPA2	VIFDGKPLNSEDEISNSGYLGNK	77	//12	3//65	0.061	0.15	R.GM[147.04]AINFK[2761.38]DKR.Y	4YM7_2_RPA2	1	RPA2	GMAINFKDKR	441	126.128	84655.2	127.131	127463	90769.3	128987	1.42104	0.703708	-0.506952
				-438	71.8782	JL033021_040221_RPA2HFH_Q2_1to2_1ug.14436.14436.5	P	8.7605	0.255565	0.0465	//12	24//184	8.7075	1.47826	K.VIFDGK[1460.78]PLNSEDEISNSGYLGNK.L	4YM7_2_RPA2	1	RPA2	VIFDGKPLNSEDEISNSGYLGNK	77	//12	2//65	0.053	0.1	R.GM[147.04]AINFK[2761.38]DKR.Y	4YM7_2_RPA2	1	RPA2	GMAINFKDKR	441	126.127	77514.9	127.13	202302	82417.1	209825	2.54589	0.39279	-1.34817
				-438	74.1104	JL033021_040221_RPA2HFH_Q2_1to2_1ug.14413.14413.5	P	8.75925	0.293801	0.289	//12	20//184	8.6925	1.34783	K.VIFDGK[1460.78]PLNSEDEISNSGYLGNK.L	4YM7_2_RPA2	1	RPA2	VIFDGKPLNSEDEISNSGYLGNK	77	//12	2//65	0.06675	0.1	R.GM[147.04]AINFK[2761.38]DKR.Y	4YM7_2_RPA2	1	RPA2	GMAINFKDKR	441	126.127	32447.4	127.13	65279.6	34657.3	67039.6	1.93436	0.516968	-0.951854
				-438	76.4224	JL033021_040221_RPA2HFH_Q2_5to1_50B.14338.14338.5	P	8.709	0.238179	0.321	//12	23//184	8.655	1.45652	K.VIFDGK[1460.78]PLNSEDEISNSGYLGNK.L	4YM7_2_RPA2	1	RPA2	VIFDGKPLNSEDEISNSGYLGNK	77	//12	2//65	0.054	0.1	R.GM[147.04]AINFK[2761.38]DKR.Y	4YM7_2_RPA2	1	RPA2	GMAINFKDKR	441	126.127	240976	127.13	87107.9	260623	71710.1	0.275149	3.63439	1.86171
				-141	27.2806	JL033021_040221_RPA2HFH_Q2_1to5_50B.13439.13439.5	NP	8.66375	0.217898	0.00333	//12	24//184	7.84575	1.30435	K.VIFDGK[1460.78]PLNSEDEISNSGYLGNK.L	4YM7_2_RPA2	1	RPA2	VIFDGKPLNSEDEISNSGYLGNK	77	//12	5//65	0.818	0.6	R.GM[147.04]AINFK[2761.38]DKR.Y	4YM7_2_RPA2	1	RPA2	GMAINFKDKR	441	126.127	49318.7	127.13	166105	52133.6	173568	3.32929	0.300364	-1.73521
				-141	29.1939	JL033021_040221_RPA2HFH_Q2_10to1_1ug.13696.13696.5	P	8.61175	0.220151	0.139	//12	22//184	7.99475	1.3913	K.VIFDGK[1460.78]PLNSEDEISNSGYLGNK.L	4YM7_2_RPA2	1	RPA2	VIFDGKPLNSEDEISNSGYLGNK	77	//12	4//65	0.617	0.4	R.GM[147.04]AINFK[2761.38]DKR.Y	4YM7_2_RPA2	1	RPA2	GMAINFKDKR	441	126.127	137943	127.13	23982.7	149400	13315.8	0.0891286	11.2197	3.48797
				-141	28.9548	JL033021_040221_RPA2HFH_Q2_2to1_1ug.13745.13745.5	P	8.4425	0.208681	0.00733	//12	19//184	7.77225	1.26087	K.VIFDGK[1460.78]PLNSEDEISNSGYLGNK.L	4YM7_2_RPA2	1	RPA2	VIFDGKPLNSEDEISNSGYLGNK	77	//12	5//65	0.67025	0.45	R.GM[147.04]AINFK[2761.38]DKR.Y	4YM7_2_RPA2	1	RPA2	GMAINFKDKR	441	126.127	73581	127.13	35204.4	79510	31118.8	0.391382	2.55505	1.35335
				-141	31.3181	JL033021_040221_RPA2HFH_Q2_1to10_1ug.13812.13812.4	NP	8.30025	0.257848	0.139	//12	17//136	7.39425	1.06522	K.VIFDGK[1460.78]PLNSEDEISNSGYLGNK.L	4YM7_2_RPA2	1	RPA2	VIFDGKPLNSEDEISNSGYLGNK	77	//12	6//51	0.906	0.5	R.GM[147.04]AINFK[2761.38]DKR.Y	4YM7_2_RPA2	1	RPA2	GMAINFKDKR	441	126.127	7576.5	127.13	48164.5	7824.74	50932	6.5091	0.153631	-2.70246
				-438	76.1833	JL033021_040221_RPA2HFH_Q2_5to1_1ug.14378.14378.5	P	8.2765	0.237152	3.4e-05	//12	24//184	8.22275	1.47826	K.VIFDGK[1460.78]PLNSEDEISNSGYLGNK.L	4YM7_2_RPA2	1	RPA2	VIFDGKPLNSEDEISNSGYLGNK	77	//12	2//65	0.05375	0.1	R.GM[147.04]AINFK[2761.38]DKR.Y	4YM7_2_RPA2	1	RPA2	GMAINFKDKR	441	126.127	225167	127.13	79352.4	243542	64818.7	0.26615	3.75728	1.90969
				-141	25.4504	JL033021_040221_RPA2HFH_Q2_2to1_1ug.13761.13761.4	P	8.274	0.276279	0.204	//12	15//136	7.5625	1.02174	K.VIFDGK[1460.78]PLNSEDEISNSGYLGNK.L	4YM7_2_RPA2	1	RPA2	VIFDGKPLNSEDEISNSGYLGNK	77	//12	4//51	0.7115	0.4	R.GM[147.04]AINFK[2761.38]DKR.Y	4YM7_2_RPA2	1	RPA2	GMAINFKDKR	441	126.127	42652.7	127.13	20515.2	46088.7	18154.6	0.393906	2.53868	1.34408
				-141	29.8317	JL033021_040221_RPA2HFH_Q2_10to1_50B.13866.13866.5	NP	8.26525	0.235085	2.74e-08	//12	21//184	7.477	1.23913	K.VIFDGK[1460.78]PLNSEDEISNSGYLGNK.L	4YM7_2_RPA2	1	RPA2	VIFDGKPLNSEDEISNSGYLGNK	77	//12	6//65	0.78825	0.65	R.GM[147.04]AINFK[2761.38]DKR.Y	4YM7_2_RPA2	1	RPA2	GMAINFKDKR	441	126.127	64620.4	127.13	11839.7	69982.6	6886.01	0.0983961	10.163	3.34525
				-438	75.5455	JL033021_040221_RPA2HFH_Q2_1to5_50B.14109.14109.5	P	8.207	0.22876	0.284	//12	22//184	8.14525	1.43478	K.VIFDGK[1460.78]PLNSEDEISNSGYLGNK.L	4YM7_2_RPA2	1	RPA2	VIFDGKPLNSEDEISNSGYLGNK	77	//12	3//65	0.06175	0.15	R.GM[147.04]AINFK[2761.38]DKR.Y	4YM7_2_RPA2	1	RPA2	GMAINFKDKR	441	126.127	140165	127.13	871395	144917	921188	6.35667	0.157315	-2.66827
				-141	28.1575	JL033021_040221_RPA2HFH_Q2_1to5_1ug.13716.13716.5	P	8.0275	0.197973	0.00041	//12	17//184	7.40925	1.06522	K.VIFDGK[1460.78]PLNSEDEISNSGYLGNK.L	4YM7_2_RPA2	1	RPA2	VIFDGKPLNSEDEISNSGYLGNK	77	//12	6//65	0.61825	0.5	R.GM[147.04]AINFK[2761.38]DKR.Y	4YM7_2_RPA2	1	RPA2	GMAINFKDKR	441	126.127	18126.8	127.13	64319.1	19134.8	67295.8	3.51693	0.284339	-1.81432
				-141	29.3409	JL033021_040221_RPA2HFH_Q2_1to5_1ug.13748.13748.4	P	7.83825	0.256336	0.005	//12	19//136	6.87125	1.08696	K.VIFDGK[1460.78]PLNSEDEISNSGYLGNK.L	4YM7_2_RPA2	1	RPA2	VIFDGKPLNSEDEISNSGYLGNK	77	1//12	7//51	0.967	0.55	R.GM[147.04]AINFK[2761.38]DKR.Y	4YM7_2_RPA2	1	RPA2	GMAINFKDKR	441	126.127	11121.3	127.13	36742	11761.8	38373.7	3.26256	0.306508	-1.706
				0	2.62176	JL033021_040221_RPA2HFH_Q2_1to5_50B.13425.13425.4	N	7.72525	0.24651		3//12	8//45	1.0125	0.666667	R.GM[147.04]AINFK[2902.49]DKR.Y	4YM7_2_RPA2	1	RPA2	GMAINFKDKR	441	2//16	23//134	6.71275	1.29545	K.VIFDGK[1601.89]PLNSEDEISNSGYLGNK.L	4YM7_2_RPA2	1	RPA2	VIFDGKPLNSEDEISNSGYLGNK	77	126.127	16304.5	127.13	55178.3	17232.9	57664.3	3.34617	0.298849	-1.74251
				-141	28.875	JL033021_040221_RPA2HFH_Q2_1to2_50B.13220.13220.5	NP	7.6965	0.222282	0.0292	//12	20//184	6.9195	1.1087	K.VIFDGK[1460.78]PLNSEDEISNSGYLGNK.L	4YM7_2_RPA2	1	RPA2	VIFDGKPLNSEDEISNSGYLGNK	77	//12	5//65	0.777	0.6	R.GM[147.04]AINFK[2761.38]DKR.Y	4YM7_2_RPA2	1	RPA2	GMAINFKDKR	441	126.127	47352.3	127.13	75944.5	50734.4	77129.8	1.52027	0.65778	-0.604323
				1444	42.6423	JL033021_040221_RPA2HFH_Q2_1to5_1ug.13724.13724.3	P	7.20525	0.182742	0.00663	//12	17//88	6.58675	1.1087	K.VIFDGK[1460.78]PLNSEDEISNSGYLGNK.L	4YM7_2_RPA2	1	RPA2	VIFDGKPLNSEDEISNSGYLGNK	77	//12	4//37	0.6185	0.4	R.GM[147.04]AINFK[2761.38]DKR.Y	4YM7_2_RPA2	1	RPA2	GMAINFKDKR	441	126.127	26131.9	127.13	86609.4	27634.8	90463.1	3.27352	0.305481	-1.71084
				-141	26.5984	JL033021_040221_RPA2HFH_Q2_1to5_1ug.13722.13722.4	P	6.6865	0.252078	0.188	//12	14//136	6.131	1	K.VIFDGK[1460.78]PLNSEDEISNSGYLGNK.L	4YM7_2_RPA2	1	RPA2	VIFDGKPLNSEDEISNSGYLGNK	77	//12	4//51	0.5555	0.4	R.GM[147.04]AINFK[2761.38]DKR.Y	4YM7_2_RPA2	1	RPA2	GMAINFKDKR	441	126.127	7051.28	127.13	23851.4	7452.9	24925.7	3.34443	0.299005	-1.74176
				-438	73.5648	JL033021_040221_RPA2HFH_Q2_10to1_50B.14567.14567.6	P	6.57525	0.216316	0.000108	//12	20//184	6.289	1.19565	K.VIFDGK[1460.78]PLNSEDEISNSGYLGNK.L	4YM7_2_RPA2	1	RPA2	VIFDGKPLNSEDEISNSGYLGNK	77	//12	3//65	0.28625	0.25	R.GM[147.04]AINFK[2761.38]DKR.Y	4YM7_2_RPA2	1	RPA2	GMAINFKDKR	441	126.127	123780	127.131	31528.3	133979	22673.1	0.169228	5.90917	2.56296
				-141	33.2883	JL033021_040221_RPA2HFH_Q2_2to1_1ug.13773.13773.6	P	6.47325	0.221478	0.0507	//12	19//184	5.66075	1.06522	K.VIFDGK[1460.78]PLNSEDEISNSGYLGNK.L	4YM7_2_RPA2	1	RPA2	VIFDGKPLNSEDEISNSGYLGNK	77	1//12	6//65	0.8125	0.65	R.GM[147.04]AINFK[2761.38]DKR.Y	4YM7_2_RPA2	1	RPA2	GMAINFKDKR	441	126.127	87551.9	127.13	41686.2	94608.3	36810.4	0.389082	2.57015	1.36185
				-141	25.8331	JL033021_040221_RPA2HFH_Q2_5to1_1ug.13697.13697.4	P	6.473	0.222712	0.0504	//12	15//136	5.98	0.869565	K.VIFDGK[1460.78]PLNSEDEISNSGYLGNK.L	4YM7_2_RPA2	1	RPA2	VIFDGKPLNSEDEISNSGYLGNK	77	//12	3//51	0.493	0.25	R.GM[147.04]AINFK[2761.38]DKR.Y	4YM7_2_RPA2	1	RPA2	GMAINFKDKR	441	126.126	35083.5	127.13	9614.27	37968.8	7152.93	0.18839	5.30814	2.40821
				-141	28.6962	JL033021_040221_RPA2HFH_Q2_1to10_50B.13537.13537.6	P	6.421	0.179187	0.0021	//12	19//184	5.696	1.06522	K.VIFDGK[1460.78]PLNSEDEISNSGYLGNK.L	4YM7_2_RPA2	1	RPA2	VIFDGKPLNSEDEISNSGYLGNK	77	//12	5//65	0.725	0.6	R.GM[147.04]AINFK[2761.38]DKR.Y	4YM7_2_RPA2	1	RPA2	GMAINFKDKR	441	126.127	28348.8	127.13	175785	29313.7	185823	6.33914	0.15775	-2.66429
				-141	32.3316	JL033021_040221_RPA2HFH_Q2_10to1_1ug.13720.13720.6	P	6.415	0.214337	0.0649	//12	19//184	5.712	1.02174	K.VIFDGK[1460.78]PLNSEDEISNSGYLGNK.L	4YM7_2_RPA2	1	RPA2	VIFDGKPLNSEDEISNSGYLGNK	77	//12	5//65	0.703	0.6	R.GM[147.04]AINFK[2761.38]DKR.Y	4YM7_2_RPA2	1	RPA2	GMAINFKDKR	441	126.127	139833	127.13	23413.4	151455	12536.1	0.0827717	12.0814	3.59472
				-438	73.8588	JL033021_040221_RPA2HFH_Q2_1to1_50B.14419.14419.4	P	6.39625	0.195079	0.58	//12	19//136	6.30375	0.956522	K.VIFDGK[1460.78]PLNSEDEISNSGYLGNK.L	4YM7_2_RPA2	1	RPA2	VIFDGKPLNSEDEISNSGYLGNK	77	//12	2//51	0.0925	0.1	R.GM[147.04]AINFK[2761.38]DKR.Y	4YM7_2_RPA2	1	RPA2	GMAINFKDKR	441	126.127	52573.6	127.13	81573.5	56351	82693	1.46746	0.681448	-0.553325
				-141	28.8875	JL033021_040221_RPA2HFH_Q2_1to10_1ug.13806.13806.6	P	6.3765	0.20921	0.00146	//12	19//184	5.5615	1.02174	K.VIFDGK[1460.78]PLNSEDEISNSGYLGNK.L	4YM7_2_RPA2	1	RPA2	VIFDGKPLNSEDEISNSGYLGNK	77	1//12	6//65	0.815	0.65	R.GM[147.04]AINFK[2761.38]DKR.Y	4YM7_2_RPA2	1	RPA2	GMAINFKDKR	441	126.128	14081.6	127.131	91568.9	14526.3	96859.4	6.66787	0.149973	-2.73723
				-438	75.7652	JL033021_040221_RPA2HFH_Q2_1to1_50B.14391.14391.6	P	6.3645	0.187932	1.97e-07	//12	20//184	6.259	1.13043	K.VIFDGK[1460.78]PLNSEDEISNSGYLGNK.L	4YM7_2_RPA2	1	RPA2	VIFDGKPLNSEDEISNSGYLGNK	77	//12	2//65	0.1055	0.1	R.GM[147.04]AINFK[2761.38]DKR.Y	4YM7_2_RPA2	1	RPA2	GMAINFKDKR	441	126.127	97280.2	127.13	143919	104327	145487	1.39453	0.717086	-0.479783
				-438	74.7129	JL033021_040221_RPA2HFH_Q2_1to10_50B.14191.14191.6	P	6.30125	0.174166	0.00116	//12	21//184	6.19875	1.28261	K.VIFDGK[1460.78]PLNSEDEISNSGYLGNK.L	4YM7_2_RPA2	1	RPA2	VIFDGKPLNSEDEISNSGYLGNK	77	//12	2//65	0.1025	0.1	R.GM[147.04]AINFK[2761.38]DKR.Y	4YM7_2_RPA2	1	RPA2	GMAINFKDKR	441	126.127	65081.6	127.13	619661	65539	658175	10.0425	0.0995768	-3.32805
				-438	76.0522	JL033021_040221_RPA2HFH_Q2_2to1_1ug.14448.14448.6	P	6.29225	0.179144	0.018	//12	20//184	6.18275	1.19565	K.VIFDGK[1460.78]PLNSEDEISNSGYLGNK.L	4YM7_2_RPA2	1	RPA2	VIFDGKPLNSEDEISNSGYLGNK	77	//12	2//65	0.1095	0.1	R.GM[147.04]AINFK[2761.38]DKR.Y	4YM7_2_RPA2	1	RPA2	GMAINFKDKR	441	126.127	190618	127.13	140356	205578	133290	0.64837	1.54233	0.625112
				-142	32.0799	JL033021_040221_RPA2HFH_Q2_1to5_100B.14432.14432.5	P	6.278	0.212702	0.0271	//12	15//184	5.927	0.934783	K.VIFDGK[1460.78]PLNSEDEISNSGYLGNK.L	4YM7_2_RPA2	1	RPA2	VIFDGKPLNSEDEISNSGYLGNK	77	//12	3//65	0.351	0.25	R.GM[147.04]AINFK[2761.38]DKR.Y	4YM7_2_RPA2	1	RPA2	GMAINFKDKR	441	126.127	12932.2	127.13	46469.2	13646.6	48634.6	3.56387	0.280594	-1.83344
				-438	75.3825	JL033021_040221_RPA2HFH_Q2_5to1_1ug.14380.14380.6	P	6.26975	0.18716	3.08e-07	//12	21//184	6.16675	1.15217	K.VIFDGK[1460.78]PLNSEDEISNSGYLGNK.L	4YM7_2_RPA2	1	RPA2	VIFDGKPLNSEDEISNSGYLGNK	77	//12	2//65	0.103	0.1	R.GM[147.04]AINFK[2761.38]DKR.Y	4YM7_2_RPA2	1	RPA2	GMAINFKDKR	441	126.128	191867	127.131	67574.7	207525	55187.4	0.265932	3.76036	1.91087
				-438	74.3302	JL033021_040221_RPA2HFH_Q2_1to5_50B.14101.14101.6	P	6.24175	0.177363	0.0148	//12	20//184	6.14325	1.13043	K.VIFDGK[1460.78]PLNSEDEISNSGYLGNK.L	4YM7_2_RPA2	1	RPA2	VIFDGKPLNSEDEISNSGYLGNK	77	//12	2//65	0.0985	0.1	R.GM[147.04]AINFK[2761.38]DKR.Y	4YM7_2_RPA2	1	RPA2	GMAINFKDKR	441	126.127	76054	127.131	434154	78947	458404	5.80647	0.172222	-2.53766
				-438	74.0432	JL033021_040221_RPA2HFH_Q2_1to5_1ug.14424.14424.6	P	6.22	0.176186	0.000107	//12	18//184	6.11375	1.08696	K.VIFDGK[1460.78]PLNSEDEISNSGYLGNK.L	4YM7_2_RPA2	1	RPA2	VIFDGKPLNSEDEISNSGYLGNK	77	//12	3//65	0.10625	0.15	R.GM[147.04]AINFK[2761.38]DKR.Y	4YM7_2_RPA2	1	RPA2	GMAINFKDKR	441	126.127	49039.7	127.13	263850	51036	278335	5.45369	0.183362	-2.44723
				-438	73.1822	JL033021_040221_RPA2HFH_Q2_2to1_50B.13753.13753.6	P	6.19325	0.17125	0.272	//12	18//184	6.073	1.08696	K.VIFDGK[1460.78]PLNSEDEISNSGYLGNK.L	4YM7_2_RPA2	1	RPA2	VIFDGKPLNSEDEISNSGYLGNK	77	//12	3//65	0.12025	0.15	R.GM[147.04]AINFK[2761.38]DKR.Y	4YM7_2_RPA2	1	RPA2	GMAINFKDKR	441	126.127	393275	127.13	274163	424265	258483	0.609249	1.64136	0.714896
				-438	75.9566	JL033021_040221_RPA2HFH_Q2_1to1_1ug.14316.14316.6	P	6.185	0.179499	0.00135	//12	18//184	6.0765	1.04348	K.VIFDGK[1460.78]PLNSEDEISNSGYLGNK.L	4YM7_2_RPA2	1	RPA2	VIFDGKPLNSEDEISNSGYLGNK	77	//12	2//65	0.1085	0.1	R.GM[147.04]AINFK[2761.38]DKR.Y	4YM7_2_RPA2	1	RPA2	GMAINFKDKR	441	126.128	114843	127.131	166387	123191	167988	1.36364	0.733332	-0.447462
				-141	29.0789	JL033021_040221_RPA2HFH_Q2_1to2_1ug.13769.13769.6	P	6.1845	0.218564	0.00319	//12	18//184	5.38125	1	K.VIFDGK[1460.78]PLNSEDEISNSGYLGNK.L	4YM7_2_RPA2	1	RPA2	VIFDGKPLNSEDEISNSGYLGNK	77	1//12	6//65	0.80325	0.65	R.GM[147.04]AINFK[2761.38]DKR.Y	4YM7_2_RPA2	1	RPA2	GMAINFKDKR	441	126.127	39348.1	127.13	67695	42121.2	69008.3	1.63833	0.610379	-0.712223
				-438	73.9475	JL033021_040221_RPA2HFH_Q2_5to1_50B.14344.14344.6	P	6.18225	0.16908	0.000112	//12	18//184	6.08475	1.08696	K.VIFDGK[1460.78]PLNSEDEISNSGYLGNK.L	4YM7_2_RPA2	1	RPA2	VIFDGKPLNSEDEISNSGYLGNK	77	//12	2//65	0.0975	0.1	R.GM[147.04]AINFK[2761.38]DKR.Y	4YM7_2_RPA2	1	RPA2	GMAINFKDKR	441	126.127	259899	127.13	98980.8	281048	82734.2	0.294378	3.39699	1.76426
				-141	27.3568	JL033021_040221_RPA2HFH_Q2_1to1_50B.13803.13803.6	P	6.1445	0.206945	4.88e-05	//12	21//184	5.389	1	K.VIFDGK[1460.78]PLNSEDEISNSGYLGNK.L	4YM7_2_RPA2	1	RPA2	VIFDGKPLNSEDEISNSGYLGNK	77	//12	5//65	0.7555	0.6	R.GM[147.04]AINFK[2761.38]DKR.Y	4YM7_2_RPA2	1	RPA2	GMAINFKDKR	441	126.127	57081.4	127.13	55098.9	61454.9	53918.6	0.877368	1.13977	0.188745
				-438	74.0432	JL033021_040221_RPA2HFH_Q2_1to2_50B.13922.13922.6	P	6.13925	0.164116	0.132	//12	20//184	6.0545	1.13043	K.VIFDGK[1460.78]PLNSEDEISNSGYLGNK.L	4YM7_2_RPA2	1	RPA2	VIFDGKPLNSEDEISNSGYLGNK	77	//12	2//65	0.08475	0.1	R.GM[147.04]AINFK[2761.38]DKR.Y	4YM7_2_RPA2	1	RPA2	GMAINFKDKR	441	126.127	380202	127.13	951864	404576	985868	2.43679	0.410375	-1.28498
				-141	30.3225	JL033021_040221_RPA2HFH_Q2_1to1_1ug.13665.13665.6	P	6.055	0.213528	0.0529	//12	17//184	5.321	0.913043	K.VIFDGK[1460.78]PLNSEDEISNSGYLGNK.L	4YM7_2_RPA2	1	RPA2	VIFDGKPLNSEDEISNSGYLGNK	77	1//12	6//65	0.734	0.65	R.GM[147.04]AINFK[2761.38]DKR.Y	4YM7_2_RPA2	1	RPA2	GMAINFKDKR	441	126.127	51835.8	127.131	47984.5	55824	46765.9	0.837738	1.19369	0.255429
				-438	74.9042	JL033021_040221_RPA2HFH_Q2_1to10_1ug.14468.14468.6	P	6.05075	0.174741	0.0104	//12	17//184	5.944	1.02174	K.VIFDGK[1460.78]PLNSEDEISNSGYLGNK.L	4YM7_2_RPA2	1	RPA2	VIFDGKPLNSEDEISNSGYLGNK	77	//12	2//65	0.10675	0.1	R.GM[147.04]AINFK[2761.38]DKR.Y	4YM7_2_RPA2	1	RPA2	GMAINFKDKR	441	126.127	25191.3	127.13	222173	25512.2	235815	9.24324	0.108187	-3.2084
				-141	28.1929	JL033021_040221_RPA2HFH_Q2_10to1_1ug.13704.13704.4	P	6.02825	0.221708	0.304	//12	15//136	5.38625	0.869565	K.VIFDGK[1460.78]PLNSEDEISNSGYLGNK.L	4YM7_2_RPA2	1	RPA2	VIFDGKPLNSEDEISNSGYLGNK	77	//12	4//51	0.642	0.4	R.GM[147.04]AINFK[2761.38]DKR.Y	4YM7_2_RPA2	1	RPA2	GMAINFKDKR	441	126.127	70355.7	127.13	13627.2	76187.7	8286.6	0.108766	9.19408	3.20071
				-141	30.2269	JL033021_040221_RPA2HFH_Q2_5to1_1ug.13717.13717.6	P	6.02575	0.21815	0.00135	//12	17//184	5.28125	0.978261	K.VIFDGK[1460.78]PLNSEDEISNSGYLGNK.L	4YM7_2_RPA2	1	RPA2	VIFDGKPLNSEDEISNSGYLGNK	77	//12	6//65	0.7445	0.65	R.GM[147.04]AINFK[2761.38]DKR.Y	4YM7_2_RPA2	1	RPA2	GMAINFKDKR	441	126.127	97387.2	127.13	24214.2	105417	17204.8	0.163208	6.12715	2.61522
				-141	25.259	JL033021_040221_RPA2HFH_Q2_1to2_1ug.13764.13764.4	P	6.01225	0.211457	0.441	//12	15//136	5.1785	0.782609	K.VIFDGK[1460.78]PLNSEDEISNSGYLGNK.L	4YM7_2_RPA2	1	RPA2	VIFDGKPLNSEDEISNSGYLGNK	77	//12	5//51	0.83375	0.45	R.GM[147.04]AINFK[2761.38]DKR.Y	4YM7_2_RPA2	1	RPA2	GMAINFKDKR	441	126.127	19928	127.13	31663.7	21353.7	32141.2	1.50518	0.664372	-0.589938
				-141	30.0355	JL033021_040221_RPA2HFH_Q2_1to5_1ug.13741.13741.6	P	5.87625	0.200261	0.00126	//12	16//184	5.03975	0.847826	K.VIFDGK[1460.78]PLNSEDEISNSGYLGNK.L	4YM7_2_RPA2	1	RPA2	VIFDGKPLNSEDEISNSGYLGNK	77	1//12	6//65	0.8365	0.65	R.GM[147.04]AINFK[2761.38]DKR.Y	4YM7_2_RPA2	1	RPA2	GMAINFKDKR	441	126.127	19736.7	127.13	70045.8	20834.2	73288	3.51768	0.284278	-1.81462
				-141	33.1677	JL033021_040221_RPA2HFH_Q2_10to1_50B.13867.13867.4	P	5.566	0.20233	0.00737	//12	16//136	4.78875	0.869565	K.VIFDGK[1460.78]PLNSEDEISNSGYLGNK.L	4YM7_2_RPA2	1	RPA2	VIFDGKPLNSEDEISNSGYLGNK	77	//12	5//51	0.77725	0.45	R.GM[147.04]AINFK[2761.38]DKR.Y	4YM7_2_RPA2	1	RPA2	GMAINFKDKR	441	126.127	32159.5	127.13	5440.5	34831.7	2942.89	0.0844887	11.8359	3.5651
				-141	28.2178	JL033021_040221_RPA2HFH_Q2_1to2_1ug.13753.13753.6	P	5.52225	0.202051	0.000917	//12	14//184	4.85875	0.804348	K.VIFDGK[1460.78]PLNSEDEISNSGYLGNK.L	4YM7_2_RPA2	1	RPA2	VIFDGKPLNSEDEISNSGYLGNK	77	//12	5//65	0.6635	0.6	R.GM[147.04]AINFK[2761.38]DKR.Y	4YM7_2_RPA2	1	RPA2	GMAINFKDKR	441	126.127	32825.9	127.13	50048.3	35191.6	50684	1.44023	0.694335	-0.526297
				-141	25.0608	JL033021_040221_RPA2HFH_Q2_1to10_1ug.13794.13794.6	P	5.29875	0.190877	0.00106	//12	15//184	4.66125	0.869565	K.VIFDGK[1460.78]PLNSEDEISNSGYLGNK.L	4YM7_2_RPA2	1	RPA2	VIFDGKPLNSEDEISNSGYLGNK	77	1//12	5//65	0.6375	0.45	R.GM[147.04]AINFK[2761.38]DKR.Y	4YM7_2_RPA2	1	RPA2	GMAINFKDKR	441	126.128	12212	127.131	73184.9	12648.3	77327.3	6.11367	0.163568	-2.61204
				-141	28.9548	JL033021_040221_RPA2HFH_Q2_1to5_100B.14386.14386.5	P	5.1925	0.177497	0.176	//12	13//184	4.88275	0.717391	K.VIFDGK[1460.78]PLNSEDEISNSGYLGNK.L	4YM7_2_RPA2	1	RPA2	VIFDGKPLNSEDEISNSGYLGNK	77	//12	3//65	0.30975	0.25	R.GM[147.04]AINFK[2761.38]DKR.Y	4YM7_2_RPA2	1	RPA2	GMAINFKDKR	441	126.127	14191.6	127.13	48180.7	14998.5	50355.6	3.35738	0.297851	-1.74734
				-141	31.9046	JL033021_040221_RPA2HFH_Q2_10to1_50B.13843.13843.5	P	5.1405	0.172422	0.00107	//12	14//184	4.551	0.869565	K.VIFDGK[1460.78]PLNSEDEISNSGYLGNK.L	4YM7_2_RPA2	1	RPA2	VIFDGKPLNSEDEISNSGYLGNK	77	//12	5//65	0.5895	0.45	R.GM[147.04]AINFK[2761.38]DKR.Y	4YM7_2_RPA2	1	RPA2	GMAINFKDKR	441	126.127	41034.7	127.13	7888.45	44436.7	4769.32	0.107328	9.3172	3.2199
				-141	23.2431	JL033021_040221_RPA2HFH_Q2_5to1_1ug.13774.13774.6	P	4.984	0.181705	0.0112	//12	12//184	4.49	0.76087	K.VIFDGK[1460.78]PLNSEDEISNSGYLGNK.L	4YM7_2_RPA2	1	RPA2	VIFDGKPLNSEDEISNSGYLGNK	77	//12	4//65	0.494	0.4	R.GM[147.04]AINFK[2761.38]DKR.Y	4YM7_2_RPA2	1	RPA2	GMAINFKDKR	441	126.127	79025.7	127.13	22559.1	85517.5	17079.6	0.19972	5.00701	2.32395
				-438	72.7995	JL033021_040221_RPA2HFH_Q2_1to5_100B.15205.15205.6	P	4.923	0.171122	0.118	//12	14//184	4.8315	0.782609	K.VIFDGK[1460.78]PLNSEDEISNSGYLGNK.L	4YM7_2_RPA2	1	RPA2	VIFDGKPLNSEDEISNSGYLGNK	77	//12	2//65	0.0915	0.1	R.GM[147.04]AINFK[2761.38]DKR.Y	4YM7_2_RPA2	1	RPA2	GMAINFKDKR	441	126.128	21245.8	127.131	94327	22273.2	99171.8	4.45251	0.224592	-2.15462
				-438	77.0602	JL033021_040221_RPA2HFH_Q2_1to10_D.14931.14931.5	P	4.79125	0.242356	1.87e-05	//12	12//184	4.59	0.73913	K.VIFDGK[1460.78]PLNSEDEISNSGYLGNK.L	4YM7_2_RPA2	1	RPA2	VIFDGKPLNSEDEISNSGYLGNK	77	//12	3//65	0.20125	0.25	R.GM[147.04]AINFK[2761.38]DKR.Y	4YM7_2_RPA2	1	RPA2	GMAINFKDKR	441	126.127	2814.64	127.13	20950.6	2881.98	22197.6	7.70219	0.129833	-2.94527
				-438	71.1801	JL033021_040221_RPA2HFH_Q2_1to5_1ug.14429.14429.4	P	4.683	0.150472	0.157	//12	15//136	4.65125	0.869565	K.VIFDGK[1460.78]PLNSEDEISNSGYLGNK.L	4YM7_2_RPA2	1	RPA2	VIFDGKPLNSEDEISNSGYLGNK	77	//12	1//51	0.03175	0.05	R.GM[147.04]AINFK[2761.38]DKR.Y	4YM7_2_RPA2	1	RPA2	GMAINFKDKR	441	126.127	13776.7	127.13	71208.6	14361.2	75069.1	5.2272	0.191307	-2.38604
				-439	79.7071	JL033021_040221_RPA2HFH_Q2_1to2_D.14534.14534.5	P	4.165	0.183569	0.424	//12	12//184	4.165	0.695652	K.VIFDGK[1460.78]PLNSEDEISNSGYLGNK.L	4YM7_2_RPA2	1	RPA2	VIFDGKPLNSEDEISNSGYLGNK	77	//12	//65	0	0	R.GM[147.04]AINFK[2761.38]DKR.Y	4YM7_2_RPA2	1	RPA2	GMAINFKDKR	441	126.127	7665.39	127.13	14447.3	8195.38	14793.3	1.80508	0.553991	-0.852065
				-142	30.4855	JL033021_040221_RPA2HFH_Q2_1to2_D.14105.14105.5	P	4.132	0.169514	0.21	//12	11//184	3.71675	0.608696	K.VIFDGK[1460.78]PLNSEDEISNSGYLGNK.L	4YM7_2_RPA2	1	RPA2	VIFDGKPLNSEDEISNSGYLGNK	77	//12	3//65	0.41525	0.25	R.GM[147.04]AINFK[2761.38]DKR.Y	4YM7_2_RPA2	1	RPA2	GMAINFKDKR	441	126.127	5556.57	127.13	10500	5940.53	10752.7	1.81006	0.552466	-0.856041
				-142	24.8251	JL033021_040221_RPA2HFH_Q2_1to2_100B.14352.14352.5	P	3.7605	0.125294	0.325	//12	9//184	3.384	0.543478	K.VIFDGK[1460.78]PLNSEDEISNSGYLGNK.L	4YM7_2_RPA2	1	RPA2	VIFDGKPLNSEDEISNSGYLGNK	77	//12	4//65	0.3765	0.3	R.GM[147.04]AINFK[2761.38]DKR.Y	4YM7_2_RPA2	1	RPA2	GMAINFKDKR	441	126.127	33266.8	127.13	54300.4	35635.1	55200.8	1.54906	0.645554	-0.63139
				-143	33.0526	JL033021_040221_RPA2HFH_Q2_10to1_100B.14510.14510.5	P	3.5195	0.114247	0.207	//12	13//184	3.227	0.847826	K.VIFDGK[1460.78]PLNSEDEISNSGYLGNK.L	4YM7_2_RPA2	1	RPA2	VIFDGKPLNSEDEISNSGYLGNK	77	//12	2//65	0.2925	0.2	R.GM[147.04]AINFK[2761.38]DKR.Y	4YM7_2_RPA2	1	RPA2	GMAINFKDKR	441	126.127	43366	127.131	9343.67	46953.1	6119.42	0.13033	7.6728	2.93975
				-141	28.0847	JL033021_040221_RPA2HFH_Q2_1to10_50B.13544.13544.3	P	3.17225	0.196005	0.168	//12	9//88	2.72675	0.478261	K.VIFDGK[1460.78]PLNSEDEISNSGYLGNK.L	4YM7_2_RPA2	1	RPA2	VIFDGKPLNSEDEISNSGYLGNK	77	//12	3//37	0.4455	0.25	R.GM[147.04]AINFK[2761.38]DKR.Y	4YM7_2_RPA2	1	RPA2	GMAINFKDKR	441	126.127	4824.05	127.13	33664.7	4957.72	35641.4	7.18906	0.1391	-2.8458
				-440	81.3972	JL033021_040221_RPA2HFH_Q2_5to1_D.14571.14571.5	P	2.678	0.159476	0.327	//12	10//184	2.6435	0.5	K.VIFDGK[1460.78]PLNSEDEISNSGYLGNK.L	4YM7_2_RPA2	1	RPA2	VIFDGKPLNSEDEISNSGYLGNK	77	//12	1//65	0.0345	0.05	R.GM[147.04]AINFK[2761.38]DKR.Y	4YM7_2_RPA2	1	RPA2	GMAINFKDKR	441	126.127	16333.9	127.13	5586.31	17668.2	4519.85	0.255819	3.90901	1.9668
				-142	24.267	JL033021_040221_RPA2HFH_Q2_2to1_1ug.13878.13878.5	P	2.546	0.0722885	0.204	//12	12//184	2.187	0.652174	K.VIFDGK[1460.78]PLNSEDEISNSGYLGNK.L	4YM7_2_RPA2	1	RPA2	VIFDGKPLNSEDEISNSGYLGNK	77	//12	4//65	0.359	0.3	R.GM[147.04]AINFK[2761.38]DKR.Y	4YM7_2_RPA2	1	RPA2	GMAINFKDKR	441	126.127	65481	127.13	35233.4	70725.5	31877	0.450715	2.2187	1.14971
				-141	35.0138	JL033021_040221_RPA2HFH_Q2_10to1_100B.14490.14490.5	P	2.346	0.0743617	0.179	//12	11//184	2.0705	0.586957	K.VIFDGK[1460.78]PLNSEDEISNSGYLGNK.L	4YM7_2_RPA2	1	RPA2	VIFDGKPLNSEDEISNSGYLGNK	77	//12	2//65	0.2755	0.2	R.GM[147.04]AINFK[2761.38]DKR.Y	4YM7_2_RPA2	1	RPA2	GMAINFKDKR	441	126.127	41736.3	127.13	7062.22	45204.3	3820.96	0.0845264	11.8306	3.56445
	2	RPA2:416---RPA2:460	11.2762
				-3	0.630786	JL033021_040221_RPA2HFH_Q2_10to1_1ug.22442.22442.5	N	11.2762	0.372578		1//15	9//110	3.355	1.03571	K.EK[4526.3]IDEYLQNIIAQVR.M	4YM7_2_RPA2	1	RPA2	EKIDEYLQNIIAQVR	416	//12	24//316	7.92125	0.756757	R.VNENIGSK[2238.24]M[147.04]QYFLSTGNLVSQSGLDLQQVSGYTVVAEK.I	4YM7_2_RPA2	1	RPA2	VNENIGSKMQYFLSTGNLVSQSGLDLQQVSGYTVVAEK	460	126.127	36120.5	127.13	10199.9	39088.6	7687.41	0.196666	5.08475	2.34618
				-2	1.18708	JL033021_040221_RPA2HFH_Q2_2to1_1ug.22375.22375.5	N	10.669	0.368208		//15	9//110	2.648	0.821429	K.EK[4526.3]IDEYLQNIIAQVR.M	4YM7_2_RPA2	1	RPA2	EKIDEYLQNIIAQVR	416	//12	24//316	8.021	0.77027	R.VNENIGSK[2238.24]M[147.04]QYFLSTGNLVSQSGLDLQQVSGYTVVAEK.I	4YM7_2_RPA2	1	RPA2	VNENIGSKMQYFLSTGNLVSQSGLDLQQVSGYTVVAEK	460	126.127	20873.9	127.13	10171.1	22554.4	9025.28	0.400157	2.49902	1.32136
				-3	0.544433	JL033021_040221_RPA2HFH_Q2_2to1_1ug.22437.22437.5	N	9.3165	0.309072		//15	7//110	2.261	0.75	K.EK[4526.31]IDEYLQNIIAQVR.M	4YM7_2_RPA2	1	RPA2	EKIDEYLQNIIAQVR	416	//12	22//316	7.0555	0.743243	R.VNENIGSK[2238.25]M[147.04]QYFLSTGNLVSQSGLDLQQVSGYTVVAEK.I	4YM7_2_RPA2	1	RPA2	VNENIGSKMQYFLSTGNLVSQSGLDLQQVSGYTVVAEK	460	126.127	20916.6	127.13	10688.3	22596.4	9575.6	0.423766	2.35979	1.23866
				-3	1.62171	JL033021_040221_RPA2HFH_Q2_5to1_1ug.22310.22310.5	N	9.18925	0.318612		//15	8//110	3.181	1	K.EK[4526.32]IDEYLQNIIAQVR.M	4YM7_2_RPA2	1	RPA2	EKIDEYLQNIIAQVR	416	//12	21//316	6.00825	0.689189	R.VNENIGSK[2238.26]M[147.04]QYFLSTGNLVSQSGLDLQQVSGYTVVAEK.I	4YM7_2_RPA2	1	RPA2	VNENIGSKMQYFLSTGNLVSQSGLDLQQVSGYTVVAEK	460	126.127	23901.1	127.13	5685.29	25873.7	3946.59	0.152533	6.55597	2.71281
				-2	7.92228	JL033021_040221_RPA2HFH_Q2_1to2_1ug.22334.22334.5	N	9.05575	0.295539		1//15	9//110	2.644	0.928571	K.EK[4526.36]IDEYLQNIIAQVR.M	4YM7_2_RPA2	1	RPA2	EKIDEYLQNIIAQVR	416	//12	18//316	6.41175	0.675676	R.VNENIGSK[2238.29]M[147.04]QYFLSTGNLVSQSGLDLQQVSGYTVVAEK.I	4YM7_2_RPA2	1	RPA2	VNENIGSKMQYFLSTGNLVSQSGLDLQQVSGYTVVAEK	460	126.127	10343.6	127.13	18344.3	11068.1	18728.8	1.69214	0.590969	-0.758846
				-143	20.0184	JL033021_040221_RPA2HFH_Q2_10to1_1ug.22400.22400.5	P	8.7335	0.296181	0.546	//9	13//317	5.3585	0.421053	R.VNENIGSK[2097.15]M[147.04]QYFLSTGNLVSQSGLDLQQVSGYTVVAEK.I	4YM7_2_RPA2	1	RPA2	VNENIGSKMQYFLSTGNLVSQSGLDLQQVSGYTVVAEK	460	//14	9//115	3.375	0.966667	K.EK[4385.21]IDEYLQNIIAQVR.M	4YM7_2_RPA2	1	RPA2	EKIDEYLQNIIAQVR	416	126.127	30361.2	127.13	9296.37	32850.2	7236.21	0.220279	4.53969	2.18259
				-141	22.8055	JL033021_040221_RPA2HFH_Q2_10to1_50B.22477.22477.5	P	6.70475	0.453269	4.21e-08	//9	10//317	4.44375	0.342105	R.VNENIGSK[2097.15]M[147.04]QYFLSTGNLVSQSGLDLQQVSGYTVVAEK.I	4YM7_2_RPA2	1	RPA2	VNENIGSKMQYFLSTGNLVSQSGLDLQQVSGYTVVAEK	460	//14	7//115	2.261	0.7	K.EK[4385.21]IDEYLQNIIAQVR.M	4YM7_2_RPA2	1	RPA2	EKIDEYLQNIIAQVR	416	126.127	7046.33	127.13	2460.97	7621.51	2004.56	0.263014	3.80208	1.92679
				-145	23.2466	JL033021_040221_RPA2HFH_Q2_5to1_1ug.22241.22241.5	P	6.509	0.263645	0.01	//9	14//317	5.53525	0.473684	R.VNENIGSK[2097.15]M[147.04]QYFLSTGNLVSQSGLDLQQVSGYTVVAEK.I	4YM7_2_RPA2	1	RPA2	VNENIGSKMQYFLSTGNLVSQSGLDLQQVSGYTVVAEK	460	//14	5//115	0.97375	0.3	K.EK[4385.21]IDEYLQNIIAQVR.M	4YM7_2_RPA2	1	RPA2	EKIDEYLQNIIAQVR	416	126.127	23181.6	127.13	6038.34	25090.6	4389.5	0.174946	5.71605	2.51502
	3	RPA2:416---RPA2:66	2.5395
				-142	28.9474	JL033021_040221_RPA2HFH_Q2_1to2_1ug.21030.21030.7	P	2.5395	0.0657433	0.621	//13	17//327	2.12925	0.346154	K.SAFPLLQEAVQPHIGSFNALTEGPDGGLLNLGVK[2079.14]DIGEK.V	4YM7_2_RPA2	1	RPA2	SAFPLLQEAVQPHIGSFNALTEGPDGGLLNLGVKDIGEK	66	//16	4//121	0.41025	0.2	K.E[111.03]K[4297.26]IDEYLQNIIAQVR.M	4YM7_2_RPA2	1	RPA2	EKIDEYLQNIIAQVR	416	126.127	27770.1	127.13	41243.1	29780.4	41702.3	1.40033	0.714118	-0.485766
	4	RPA2:416---RPA2:441	4.0555
				-439	76.2152	JL033021_040221_RPA2HFH_Q2_5to1_1ug.18716.18716.4	P	4.0555	0.111542	0.282	//16	12//92	3.721	0.966667	K.E[111.03]K[1917.98]IDEYLQNIIAQVR.M	4YM7_2_RPA2	1	RPA2	EKIDEYLQNIIAQVR	416	//16	3//79	0.3345	0.107143	R.MDINRGMAINFK[2079.14]DK.R	4YM7_2_RPA2	1	RPA2	MDINRGMAINFKDK	441	126.127	60490.1	127.13	15941.9	65470	11652.7	0.177985	5.61846	2.49017
	5	RPA2:266---RPA2:30	0.4405
				-141	27.1297	JL033021_040221_RPA2HFH_Q2_10to1_100B.18260.18260.5	P	0.4405	0.0217918	0.293	//14	2//101	0.4305	0.0769231	R.K[1577.86]NEYLVPVVM[147.04]ILK.A	4YM7_2_RPA2	1	RPA2	KNEYLVPVVMILK	266	//14	1//79	0.01	0.0454545	R.E[111.03]SRFINPPK[1827.06]DK.S	4YM7_2_RPA2	1	RPA2	ESRFINPPKDK	30	126.127	15489.4	127.131	1983.12	16781.6	734.546	0.0437709	22.8462	4.51388
	6	RPA2:266---RPA2:416	21.4178
				0	2.16645	JL033021_040221_RPA2HFH_Q2_1to2_1ug.22232.22232.4	N	21.4178	0.559451		//14	21//72	7.35475	2.38462	R.K[2238.25]NEYLVPVVM[147.04]ILK.A	4YM7_2_RPA2	1	RPA2	KNEYLVPVVMILK	266	1//15	33//85	14.063	3.75	K.EK[1968.16]IDEYLQNIIAQVR.M	4YM7_2_RPA2	1	RPA2	EKIDEYLQNIIAQVR	416	126.127	34888.6	127.13	54882.6	37389.2	55679.2	1.48918	0.671511	-0.574518
				-141	29.1877	JL033021_040221_RPA2HFH_Q2_5to1_1ug.22082.22082.4	NP	12.2825	0.344598	7.8e-29	//14	16//89	7.2135	1.86667	K.EK[1827.06]IDEYLQNIIAQVR.M	4YM7_2_RPA2	1	RPA2	EKIDEYLQNIIAQVR	416	2//14	18//76	5.069	2.07692	R.K[2097.15]NEYLVPVVM[147.04]ILK.A	4YM7_2_RPA2	1	RPA2	KNEYLVPVVMILK	266	126.127	72115.6	127.13	19909.8	78045.2	14861	0.190415	5.25168	2.39278
				-141	33.545	JL033021_040221_RPA2HFH_Q2_1to1_1ug.22064.22064.4	NP	12.2342	0.337702	9.52e-15	//14	17//89	7.2435	1.8	K.EK[1827.06]IDEYLQNIIAQVR.M	4YM7_2_RPA2	1	RPA2	EKIDEYLQNIIAQVR	416	2//14	18//76	4.99075	1.96154	R.K[2097.15]NEYLVPVVM[147.04]ILK.A	4YM7_2_RPA2	1	RPA2	KNEYLVPVVMILK	266	126.127	44392.3	127.131	43421.8	47788.9	42544.8	0.890265	1.12326	0.167693
				-141	26.8362	JL033021_040221_RPA2HFH_Q2_2to1_1ug.22172.22172.4	NP	12.2332	0.322662	2.77e-13	//14	17//89	7.3375	1.8	K.EK[1827.06]IDEYLQNIIAQVR.M	4YM7_2_RPA2	1	RPA2	EKIDEYLQNIIAQVR	416	2//14	18//76	4.89575	1.84615	R.K[2097.15]NEYLVPVVM[147.04]ILK.A	4YM7_2_RPA2	1	RPA2	KNEYLVPVVMILK	266	126.128	64687.8	127.131	34211	69873.7	30852.7	0.441549	2.26475	1.17935
				-141	29.3952	JL033021_040221_RPA2HFH_Q2_1to10_D.23223.23223.4	NP	11.738	0.326441	4.95e-37	1//14	19//89	7.434	1.86667	K.EK[1827.06]IDEYLQNIIAQVR.M	4YM7_2_RPA2	1	RPA2	EKIDEYLQNIIAQVR	416	2//14	16//76	4.304	1.76923	R.K[2097.15]NEYLVPVVM[147.04]ILK.A	4YM7_2_RPA2	1	RPA2	KNEYLVPVVMILK	266	126.127	10132.4	127.13	66069	10450.9	69888.7	6.68736	0.149536	-2.74144
				-141	28.9111	JL033021_040221_RPA2HFH_Q2_10to1_1ug.22185.22185.4	NP	11.6003	0.302078	1.02e-07	//14	15//89	7.0115	1.73333	K.EK[1827.06]IDEYLQNIIAQVR.M	4YM7_2_RPA2	1	RPA2	EKIDEYLQNIIAQVR	416	2//14	17//76	4.58875	1.80769	R.K[2097.15]NEYLVPVVM[147.04]ILK.A	4YM7_2_RPA2	1	RPA2	KNEYLVPVVMILK	266	126.128	86954.8	127.131	21539.6	94124.6	15275.3	0.162288	6.16188	2.62337
				-141	32.9917	JL033021_040221_RPA2HFH_Q2_5to1_1ug.22068.22068.4	NP	11.3458	0.309947	3.44e-26	//14	14//89	6.907	1.6	K.EK[1827.06]IDEYLQNIIAQVR.M	4YM7_2_RPA2	1	RPA2	EKIDEYLQNIIAQVR	416	1//14	14//76	4.43875	1.61538	R.K[2097.15]NEYLVPVVM[147.04]ILK.A	4YM7_2_RPA2	1	RPA2	KNEYLVPVVMILK	266	126.127	59530.2	127.13	16058.8	64428	11864.2	0.184146	5.43048	2.44108
				-141	31.3626	JL033021_040221_RPA2HFH_Q2_10to1_1ug.22186.22186.5	NP	11.0485	0.339109	7.24e-06	//14	15//116	7.06575	1.63333	K.EK[1827.06]IDEYLQNIIAQVR.M	4YM7_2_RPA2	1	RPA2	EKIDEYLQNIIAQVR	416	1//14	14//97	3.98275	1.5	R.K[2097.15]NEYLVPVVM[147.04]ILK.A	4YM7_2_RPA2	1	RPA2	KNEYLVPVVMILK	266	126.127	42168.1	127.13	8767.39	45658.7	5609.43	0.122856	8.13962	3.02496
				-141	33.5239	JL033021_040221_RPA2HFH_Q2_5to1_1ug.22069.22069.5	NP	11.0013	0.337353	2.41e-20	//14	14//116	7.017	1.53333	K.EK[1827.06]IDEYLQNIIAQVR.M	4YM7_2_RPA2	1	RPA2	EKIDEYLQNIIAQVR	416	1//14	14//97	3.98425	1.5	R.K[2097.15]NEYLVPVVM[147.04]ILK.A	4YM7_2_RPA2	1	RPA2	KNEYLVPVVMILK	266	126.127	31562.8	127.13	7803.21	34165.4	5528.29	0.161809	6.18011	2.62763
				-141	31.9678	JL033021_040221_RPA2HFH_Q2_2to1_1ug.22176.22176.5	NP	10.9795	0.327311	1.69e-09	//14	15//116	7.13975	1.63333	K.EK[1827.06]IDEYLQNIIAQVR.M	4YM7_2_RPA2	1	RPA2	EKIDEYLQNIIAQVR	416	1//14	14//97	3.83975	1.5	R.K[2097.15]NEYLVPVVM[147.04]ILK.A	4YM7_2_RPA2	1	RPA2	KNEYLVPVVMILK	266	126.127	36099	127.13	18827.1	38995.1	16934	0.43426	2.30277	1.20337
				-141	29.72	JL033021_040221_RPA2HFH_Q2_5to1_1ug.22086.22086.5	NP	10.8803	0.343063	2.38e-19	1//14	16//116	7.03825	1.66667	K.EK[1827.06]IDEYLQNIIAQVR.M	4YM7_2_RPA2	1	RPA2	EKIDEYLQNIIAQVR	416	1//14	14//97	3.842	1.5	R.K[2097.15]NEYLVPVVM[147.04]ILK.A	4YM7_2_RPA2	1	RPA2	KNEYLVPVVMILK	266	126.127	37038.7	127.13	11365.1	40074.9	8853.56	0.220925	4.52642	2.17837
				-141	28.8419	JL033021_040221_RPA2HFH_Q2_1to10_1ug.22250.22250.4	NP	10.7315	0.295065	7.89e-13	//14	17//89	7.24725	1.8	K.EK[1827.06]IDEYLQNIIAQVR.M	4YM7_2_RPA2	1	RPA2	EKIDEYLQNIIAQVR	416	//14	15//76	3.48425	1.5	R.K[2097.15]NEYLVPVVM[147.04]ILK.A	4YM7_2_RPA2	1	RPA2	KNEYLVPVVMILK	266	126.127	8983.53	127.13	52955.5	9311.65	55939.7	6.0075	0.166459	-2.58676
				-141	31.7949	JL033021_040221_RPA2HFH_Q2_1to5_1ug.22150.22150.5	NP	10.7115	0.324778	2.29e-12	//14	15//116	6.94675	1.56667	K.EK[1827.06]IDEYLQNIIAQVR.M	4YM7_2_RPA2	1	RPA2	EKIDEYLQNIIAQVR	416	1//14	14//97	3.76475	1.5	R.K[2097.15]NEYLVPVVM[147.04]ILK.A	4YM7_2_RPA2	1	RPA2	KNEYLVPVVMILK	266	126.127	8577.76	127.13	30446.8	9054.68	31856.2	3.5182	0.284236	-1.81484
				-1	4.46977	JL033021_040221_RPA2HFH_Q2_2to1_1ug.22147.22147.4	N	9.97225	0.333743		//14	11//72	2.47675	0.923077	R.K[2238.23]NEYLVPVVM[147.04]ILK.A	4YM7_2_RPA2	1	RPA2	KNEYLVPVVMILK	266	//15	18//85	7.4955	1.89286	K.EK[1968.14]IDEYLQNIIAQVR.M	4YM7_2_RPA2	1	RPA2	EKIDEYLQNIIAQVR	416	126.127	39211.4	127.13	18264.9	42375	16052.2	0.378813	2.63982	1.40044
				-141	32.5075	JL033021_040221_RPA2HFH_Q2_1to5_1ug.22142.22142.4	NP	9.9345	0.275217	1.37e-15	//14	14//89	6.683	1.6	K.EK[1827.06]IDEYLQNIIAQVR.M	4YM7_2_RPA2	1	RPA2	EKIDEYLQNIIAQVR	416	2//14	14//76	3.2515	1.42308	R.K[2097.15]NEYLVPVVM[147.04]ILK.A	4YM7_2_RPA2	1	RPA2	KNEYLVPVVMILK	266	126.127	11097.6	127.131	46174.7	11659.5	48483.7	4.1583	0.240483	-2.05599
				-141	32.3136	JL033021_040221_RPA2HFH_Q2_10to1_1ug.22175.22175.5	NP	9.8405	0.311956	6.36e-06	//14	16//116	6.846	1.76667	K.EK[1827.06]IDEYLQNIIAQVR.M	4YM7_2_RPA2	1	RPA2	EKIDEYLQNIIAQVR	416	1//14	12//97	2.9945	1.15385	R.K[2097.15]NEYLVPVVM[147.04]ILK.A	4YM7_2_RPA2	1	RPA2	KNEYLVPVVMILK	266	126.127	31918.8	127.13	7634.68	34552.9	5315.74	0.153844	6.50011	2.70046
				-141	32.0234	JL033021_040221_RPA2HFH_Q2_1to5_D.23355.23355.4	NP	9.83875	0.289031	7.83e-26	1//14	16//89	6.59675	1.56667	K.EK[1827.06]IDEYLQNIIAQVR.M	4YM7_2_RPA2	1	RPA2	EKIDEYLQNIIAQVR	416	1//14	14//76	3.242	1.34615	R.K[2097.15]NEYLVPVVM[147.04]ILK.A	4YM7_2_RPA2	1	RPA2	KNEYLVPVVMILK	266	126.127	11922.6	127.13	40086.3	12603.6	41885.4	3.32328	0.300908	-1.73261
				-141	32.8323	JL033021_040221_RPA2HFH_Q2_1to10_D.23255.23255.5	NP	9.60825	0.296309	8.71e-26	//14	15//116	6.7595	1.63333	K.EK[1827.06]IDEYLQNIIAQVR.M	4YM7_2_RPA2	1	RPA2	EKIDEYLQNIIAQVR	416	//14	11//97	2.84875	1.15385	R.K[2097.15]NEYLVPVVM[147.04]ILK.A	4YM7_2_RPA2	1	RPA2	KNEYLVPVVMILK	266	126.127	4459.8	127.131	31594.7	4579.54	33455.9	7.30551	0.136883	-2.86898
				-141	29.5471	JL033021_040221_RPA2HFH_Q2_1to2_1ug.22151.22151.5	NP	9.55525	0.310205	2.41e-11	//14	13//116	5.727	1.3	K.EK[1827.06]IDEYLQNIIAQVR.M	4YM7_2_RPA2	1	RPA2	EKIDEYLQNIIAQVR	416	//14	13//97	3.82825	1.46154	R.K[2097.15]NEYLVPVVM[147.04]ILK.A	4YM7_2_RPA2	1	RPA2	KNEYLVPVVMILK	266	126.127	11563.5	127.13	18238.3	12391.9	18505.8	1.49338	0.669623	-0.578579
				-141	26.4212	JL033021_040221_RPA2HFH_Q2_2to1_100B.23936.23936.4	NP	9.52325	0.254085	4.34e-11	//14	14//89	6.511	1.5	K.EK[1827.06]IDEYLQNIIAQVR.M	4YM7_2_RPA2	1	RPA2	EKIDEYLQNIIAQVR	416	//14	12//76	3.01225	1.15385	R.K[2097.15]NEYLVPVVM[147.04]ILK.A	4YM7_2_RPA2	1	RPA2	KNEYLVPVVMILK	266	126.127	21526.3	127.13	10191.2	23261.7	8988.26	0.386397	2.58801	1.37185
				-141	28.7036	JL033021_040221_RPA2HFH_Q2_1to2_1ug.22150.22150.4	NP	9.44175	0.268651	3.42e-14	//14	14//89	6.7175	1.6	K.EK[1827.06]IDEYLQNIIAQVR.M	4YM7_2_RPA2	1	RPA2	EKIDEYLQNIIAQVR	416	1//14	13//76	2.72425	1.30769	R.K[2097.15]NEYLVPVVM[147.04]ILK.A	4YM7_2_RPA2	1	RPA2	KNEYLVPVVMILK	266	126.127	19954.4	127.13	30470.1	21392.1	30859.8	1.44258	0.693204	-0.528647
				-141	27.8736	JL033021_040221_RPA2HFH_Q2_1to5_100B.24664.24664.4	NP	9.38875	0.30219	2.09e-13	1//14	15//89	6.213	1.53333	K.EK[1827.06]IDEYLQNIIAQVR.M	4YM7_2_RPA2	1	RPA2	EKIDEYLQNIIAQVR	416	//14	12//76	3.17575	1.26923	R.K[2097.15]NEYLVPVVM[147.04]ILK.A	4YM7_2_RPA2	1	RPA2	KNEYLVPVVMILK	266	126.127	6014.26	127.13	21699.1	6345.79	22712.4	3.57914	0.279397	-1.83961
				-141	31.1935	JL033021_040221_RPA2HFH_Q2_1to2_D.23251.23251.4	NP	9.317	0.313588	9.46e-36	//14	15//89	6.295	1.53333	K.EK[1827.06]IDEYLQNIIAQVR.M	4YM7_2_RPA2	1	RPA2	EKIDEYLQNIIAQVR	416	1//14	13//76	3.022	1.30769	R.K[2097.15]NEYLVPVVM[147.04]ILK.A	4YM7_2_RPA2	1	RPA2	KNEYLVPVVMILK	266	126.127	12926.4	127.13	17984.9	13872	18111.8	1.30564	0.765908	-0.384757
				-141	29.2877	JL033021_040221_RPA2HFH_Q2_1to2_1ug.22143.22143.5	NP	9.26825	0.328487	2.15e-10	1//14	13//116	5.75375	1.3	K.EK[1827.06]IDEYLQNIIAQVR.M	4YM7_2_RPA2	1	RPA2	EKIDEYLQNIIAQVR	416	1//14	14//97	3.5145	1.5	R.K[2097.15]NEYLVPVVM[147.04]ILK.A	4YM7_2_RPA2	1	RPA2	KNEYLVPVVMILK	266	126.127	10657.1	127.13	18790.5	11404.5	19178.9	1.6817	0.594636	-0.749921
				-141	28.012	JL033021_040221_RPA2HFH_Q2_1to5_D.23330.23330.4	NP	9.2	0.271647	3.25e-24	//14	13//89	6.13825	1.3	K.EK[1827.06]IDEYLQNIIAQVR.M	4YM7_2_RPA2	1	RPA2	EKIDEYLQNIIAQVR	416	1//14	14//76	3.06175	1.19231	R.K[2097.15]NEYLVPVVM[147.04]ILK.A	4YM7_2_RPA2	1	RPA2	KNEYLVPVVMILK	266	126.127	12292.6	127.13	43652	12975.9	45673.1	3.51985	0.284103	-1.81551
				-141	32.0542	JL033021_040221_RPA2HFH_Q2_1to1_1ug.22054.22054.5	NP	9.16725	0.300797	7.06e-09	//14	16//116	6.7455	1.66667	K.EK[1827.06]IDEYLQNIIAQVR.M	4YM7_2_RPA2	1	RPA2	EKIDEYLQNIIAQVR	416	//14	11//97	2.42175	1.15385	R.K[2097.15]NEYLVPVVM[147.04]ILK.A	4YM7_2_RPA2	1	RPA2	KNEYLVPVVMILK	266	126.127	18546.5	127.13	19170.1	19957.1	18877.4	0.945896	1.0572	0.0802471
				-141	29.72	JL033021_040221_RPA2HFH_Q2_1to10_1ug.22235.22235.5	NP	8.8665	0.323194	2.97e-07	//14	14//116	5.8515	1.33333	K.EK[1827.06]IDEYLQNIIAQVR.M	4YM7_2_RPA2	1	RPA2	EKIDEYLQNIIAQVR	416	//14	11//97	3.015	1.26923	R.K[2097.15]NEYLVPVVM[147.04]ILK.A	4YM7_2_RPA2	1	RPA2	KNEYLVPVVMILK	266	126.127	4139.1	127.13	26125.8	4276.24	27624.4	6.45997	0.1548	-2.69153
				-142	31.8986	JL033021_040221_RPA2HFH_Q2_1to10_D.23087.23087.5	NP	8.3725	0.269737	1.47e-23	//14	14//116	6.13475	1.53333	K.EK[1827.06]IDEYLQNIIAQVR.M	4YM7_2_RPA2	1	RPA2	EKIDEYLQNIIAQVR	416	//14	10//97	2.23775	0.884615	R.K[2097.15]NEYLVPVVM[147.04]ILK.A	4YM7_2_RPA2	1	RPA2	KNEYLVPVVMILK	266	126.127	6102.29	127.13	33764.6	6343.12	35633.8	5.6177	0.178009	-2.48998
				-141	31.9542	JL033021_040221_RPA2HFH_Q2_1to5_100B.24610.24610.4	NP	8.09675	0.244051	1.83e-14	//14	12//89	5.51725	1.26667	K.EK[1827.06]IDEYLQNIIAQVR.M	4YM7_2_RPA2	1	RPA2	EKIDEYLQNIIAQVR	416	2//14	12//76	2.5795	1.03846	R.K[2097.15]NEYLVPVVM[147.04]ILK.A	4YM7_2_RPA2	1	RPA2	KNEYLVPVVMILK	266	126.127	6724.94	127.13	24621.6	7092.73	25780.3	3.63475	0.275122	-1.86186
				-142	31.9851	JL033021_040221_RPA2HFH_Q2_1to10_D.23278.23278.5	NP	8.09625	0.262265	5.37e-22	//14	16//116	6.058	1.56667	K.EK[1827.06]IDEYLQNIIAQVR.M	4YM7_2_RPA2	1	RPA2	EKIDEYLQNIIAQVR	416	1//14	11//97	2.03825	0.923077	R.K[2097.15]NEYLVPVVM[147.04]ILK.A	4YM7_2_RPA2	1	RPA2	KNEYLVPVVMILK	266	126.127	5236.22	127.131	26817.9	5460.4	28267.5	5.17681	0.193169	-2.37206
				-142	37.1723	JL033021_040221_RPA2HFH_Q2_1to5_D.23393.23393.5	NP	8.01075	0.277611	1.29e-09	//14	13//116	5.20375	1.1	K.EK[1827.06]IDEYLQNIIAQVR.M	4YM7_2_RPA2	1	RPA2	EKIDEYLQNIIAQVR	416	//14	9//97	2.807	0.961538	R.K[2097.15]NEYLVPVVM[147.04]ILK.A	4YM7_2_RPA2	1	RPA2	KNEYLVPVVMILK	266	126.127	5145.2	127.13	17037.8	5441.23	17795.5	3.2705	0.305764	-1.70951
				-142	31.8986	JL033021_040221_RPA2HFH_Q2_1to10_D.23091.23091.5	NP	7.9595	0.243768	6.12e-27	1//14	16//116	6.08975	1.66667	K.EK[1827.06]IDEYLQNIIAQVR.M	4YM7_2_RPA2	1	RPA2	EKIDEYLQNIIAQVR	416	//14	10//97	1.86975	0.884615	R.K[2097.15]NEYLVPVVM[147.04]ILK.A	4YM7_2_RPA2	1	RPA2	KNEYLVPVVMILK	266	126.127	4550.24	127.13	30295.9	4688.19	32056	6.83761	0.14625	-2.77349
				-141	29.8102	JL033021_040221_RPA2HFH_Q2_2to1_D.23176.23176.4	NP	7.715	0.248538	3.91e-16	//14	10//89	5.13175	1.1	K.EK[1827.06]IDEYLQNIIAQVR.M	4YM7_2_RPA2	1	RPA2	EKIDEYLQNIIAQVR	416	//14	11//76	2.58325	0.961538	R.K[2097.15]NEYLVPVVM[147.04]ILK.A	4YM7_2_RPA2	1	RPA2	KNEYLVPVVMILK	266	126.127	28160.9	127.13	12091.6	30441.3	10429.1	0.342597	2.91888	1.54542
				-141	31.6776	JL033021_040221_RPA2HFH_Q2_1to10_D.23082.23082.4	NP	7.566	0.229342	1.18e-19	//14	11//89	5.818	1.23333	K.EK[1827.06]IDEYLQNIIAQVR.M	4YM7_2_RPA2	1	RPA2	EKIDEYLQNIIAQVR	416	//14	8//76	1.748	0.692308	R.K[2097.15]NEYLVPVVM[147.04]ILK.A	4YM7_2_RPA2	1	RPA2	KNEYLVPVVMILK	266	126.127	7891.57	127.13	49605.1	8154.7	52447.5	6.43156	0.155483	-2.68517
				-141	29.5471	JL033021_040221_RPA2HFH_Q2_1to5_D.23220.23220.5	NP	7.4295	0.261285	7.94e-13	//14	12//116	5.51825	1.26667	K.EK[1827.06]IDEYLQNIIAQVR.M	4YM7_2_RPA2	1	RPA2	EKIDEYLQNIIAQVR	416	//14	8//97	1.91125	0.807692	R.K[2097.15]NEYLVPVVM[147.04]ILK.A	4YM7_2_RPA2	1	RPA2	KNEYLVPVVMILK	266	126.127	5844.71	127.13	19695.4	6178.22	20580.5	3.33115	0.300197	-1.73602
				-142	30.3424	JL033021_040221_RPA2HFH_Q2_1to5_D.23416.23416.5	NP	7.01525	0.230621	1.75e-11	//14	11//116	5.269	1.13333	K.EK[1827.06]IDEYLQNIIAQVR.M	4YM7_2_RPA2	1	RPA2	EKIDEYLQNIIAQVR	416	1//14	10//97	1.74625	0.615385	R.K[2097.15]NEYLVPVVM[147.04]ILK.A	4YM7_2_RPA2	1	RPA2	KNEYLVPVVMILK	266	126.127	6622.93	127.13	18031.4	7035.71	18727.6	2.66179	0.375687	-1.4124
				-141	25.038	JL033021_040221_RPA2HFH_Q2_1to5_100B.24687.24687.4	NP	7.01375	0.232236	3.1e-08	//14	12//89	5.358	1.33333	K.EK[1827.06]IDEYLQNIIAQVR.M	4YM7_2_RPA2	1	RPA2	EKIDEYLQNIIAQVR	416	//14	7//76	1.65575	0.538462	R.K[2097.15]NEYLVPVVM[147.04]ILK.A	4YM7_2_RPA2	1	RPA2	KNEYLVPVVMILK	266	126.127	6134.73	127.13	21997.2	6474.02	23021.1	3.55592	0.281221	-1.83022
				-142	27.0572	JL033021_040221_RPA2HFH_Q2_1to5_1ug.22270.22270.5	NP	6.96425	0.248697	1.38e-08	//14	11//116	4.8795	1.13333	K.EK[1827.06]IDEYLQNIIAQVR.M	4YM7_2_RPA2	1	RPA2	EKIDEYLQNIIAQVR	416	//14	9//97	2.08475	0.730769	R.K[2097.15]NEYLVPVVM[147.04]ILK.A	4YM7_2_RPA2	1	RPA2	KNEYLVPVVMILK	266	126.126	5987.52	127.129	19225.4	6336.92	20064.1	3.16622	0.315834	-1.66276
				-141	25.6567	JL033021_040221_RPA2HFH_Q2_2to1_D.23189.23189.5	NP	6.6955	0.208388	1.4e-12	1//14	12//116	4.76975	1.16667	K.EK[1827.06]IDEYLQNIIAQVR.M	4YM7_2_RPA2	1	RPA2	EKIDEYLQNIIAQVR	416	1//14	10//97	1.92575	0.769231	R.K[2097.15]NEYLVPVVM[147.04]ILK.A	4YM7_2_RPA2	1	RPA2	KNEYLVPVVMILK	266	126.126	15754.6	127.13	7681.67	17022.9	6817.2	0.400472	2.49706	1.32023
				-141	30.4981	JL033021_040221_RPA2HFH_Q2_1to2_D.23133.23133.5	NP	6.545	0.230421	1.11e-19	//14	11//116	5.03375	1.23333	K.EK[1827.06]IDEYLQNIIAQVR.M	4YM7_2_RPA2	1	RPA2	EKIDEYLQNIIAQVR	416	//14	10//97	1.51125	0.653846	R.K[2097.15]NEYLVPVVM[147.04]ILK.A	4YM7_2_RPA2	1	RPA2	KNEYLVPVVMILK	266	126.127	8653.55	127.13	12649.3	9281.63	12777.9	1.37669	0.72638	-0.461203
				-141	28.0811	JL033021_040221_RPA2HFH_Q2_1to10_D.23325.23325.4	NP	6.46325	0.218453	2.47e-14	1//14	12//89	5.02525	1.23333	K.EK[1827.06]IDEYLQNIIAQVR.M	4YM7_2_RPA2	1	RPA2	EKIDEYLQNIIAQVR	416	//14	9//76	1.438	0.653846	R.K[2097.15]NEYLVPVVM[147.04]ILK.A	4YM7_2_RPA2	1	RPA2	KNEYLVPVVMILK	266	126.126	9796.95	127.13	43331.3	10272.1	45553.5	4.4347	0.225494	-2.14884
				-1	2.47879	JL033021_040221_RPA2HFH_Q2_2to1_D.23178.23178.5	N	6.41725	0.221284		//14	9//91	1.56625	0.615385	R.K[2238.24]NEYLVPVVM[147.04]ILK.A	4YM7_2_RPA2	1	RPA2	KNEYLVPVVMILK	266	//15	12//110	4.851	1.21429	K.EK[1968.15]IDEYLQNIIAQVR.M	4YM7_2_RPA2	1	RPA2	EKIDEYLQNIIAQVR	416	126.126	15681.7	127.13	6743.05	16951.5	5817.94	0.343211	2.91366	1.54283
				-141	31.3626	JL033021_040221_RPA2HFH_Q2_2to1_100B.23947.23947.5	NP	6.406	0.210876	5.35e-05	//14	11//116	5.05775	1.13333	K.EK[1827.06]IDEYLQNIIAQVR.M	4YM7_2_RPA2	1	RPA2	EKIDEYLQNIIAQVR	416	//14	6//97	1.34825	0.384615	R.K[2097.15]NEYLVPVVM[147.04]ILK.A	4YM7_2_RPA2	1	RPA2	KNEYLVPVVMILK	266	126.127	13422.3	127.13	7608.23	14494.2	6947.89	0.479358	2.08612	1.06082
				-142	32.158	JL033021_040221_RPA2HFH_Q2_1to5_100B.24676.24676.5	NP	6.29075	0.236463	2.95e-06	//14	10//116	4.58175	1	K.EK[1827.06]IDEYLQNIIAQVR.M	4YM7_2_RPA2	1	RPA2	EKIDEYLQNIIAQVR	416	//14	8//97	1.709	0.576923	R.K[2097.15]NEYLVPVVM[147.04]ILK.A	4YM7_2_RPA2	1	RPA2	KNEYLVPVVMILK	266	126.126	3687.4	127.13	14036.2	3884.71	14709.9	3.78663	0.264087	-1.92091
				-142	23.8584	JL033021_040221_RPA2HFH_Q2_1to1_1ug.22189.22189.5	NP	6.21775	0.226133	0.00234	//14	11//116	4.33025	1.03333	K.EK[1827.06]IDEYLQNIIAQVR.M	4YM7_2_RPA2	1	RPA2	EKIDEYLQNIIAQVR	416	//14	9//97	1.8875	0.730769	R.K[2097.15]NEYLVPVVM[147.04]ILK.A	4YM7_2_RPA2	1	RPA2	KNEYLVPVVMILK	266	126.126	13109.9	127.13	14926.1	14095.9	14817.6	1.0512	0.95129	-0.0720432
				-141	31.9678	JL033021_040221_RPA2HFH_Q2_1to5_D.23234.23234.5	NP	6.19425	0.201174	7.8e-15	//14	11//116	4.9645	1.2	K.EK[1827.06]IDEYLQNIIAQVR.M	4YM7_2_RPA2	1	RPA2	EKIDEYLQNIIAQVR	416	//14	8//97	1.22975	0.461538	R.K[2097.15]NEYLVPVVM[147.04]ILK.A	4YM7_2_RPA2	1	RPA2	KNEYLVPVVMILK	266	126.127	5136.11	127.13	20189.9	5405.74	21174.1	3.91696	0.2553	-1.96973
				-141	25.2455	JL033021_040221_RPA2HFH_Q2_1to10_D.23063.23063.4	NP	6.12375	0.210002	1.43e-10	//14	10//89	4.79075	1.1	K.EK[1827.06]IDEYLQNIIAQVR.M	4YM7_2_RPA2	1	RPA2	EKIDEYLQNIIAQVR	416	//14	7//76	1.333	0.538462	R.K[2097.15]NEYLVPVVM[147.04]ILK.A	4YM7_2_RPA2	1	RPA2	KNEYLVPVVMILK	266	126.127	8133.1	127.13	47756.2	8431.67	50444.6	5.98275	0.167147	-2.58081
				-142	30.6402	JL033021_040221_RPA2HFH_Q2_1to2_100B.24029.24029.4	NP	6.05025	0.203219	0.0034	//14	9//89	4.806	1.06667	K.EK[1827.06]IDEYLQNIIAQVR.M	4YM7_2_RPA2	1	RPA2	EKIDEYLQNIIAQVR	416	//14	7//76	1.24425	0.576923	R.K[2097.15]NEYLVPVVM[147.04]ILK.A	4YM7_2_RPA2	1	RPA2	KNEYLVPVVMILK	266	126.127	8154.58	127.13	14627.1	8724.43	14942	1.71267	0.583885	-0.776245
				-142	26.9708	JL033021_040221_RPA2HFH_Q2_2to1_100B.23904.23904.5	NP	6.00675	0.209069	0.000524	//14	10//116	4.09275	1.1	K.EK[1827.06]IDEYLQNIIAQVR.M	4YM7_2_RPA2	1	RPA2	EKIDEYLQNIIAQVR	416	1//14	8//97	1.914	0.692308	R.K[2097.15]NEYLVPVVM[147.04]ILK.A	4YM7_2_RPA2	1	RPA2	KNEYLVPVVMILK	266	126.127	12167.5	127.13	6561.61	13141.9	5939	0.451914	2.21281	1.14588
				-141	32.3001	JL033021_040221_RPA2HFH_Q2_1to10_D.23343.23343.4	NP	5.938	0.218024	2.74e-13	//14	10//89	4.92925	1.1	K.EK[1827.06]IDEYLQNIIAQVR.M	4YM7_2_RPA2	1	RPA2	EKIDEYLQNIIAQVR	416	//14	8//76	1.00875	0.461538	R.K[2097.15]NEYLVPVVM[147.04]ILK.A	4YM7_2_RPA2	1	RPA2	KNEYLVPVVMILK	266	126.127	7640.87	127.13	46720.6	7906.28	49379	6.24553	0.160114	-2.64283
				-141	33.2683	JL033021_040221_RPA2HFH_Q2_2to1_100B.23893.23893.4	NP	5.90725	0.191728	0.000495	//14	11//89	4.519	1.2	K.EK[1827.06]IDEYLQNIIAQVR.M	4YM7_2_RPA2	1	RPA2	EKIDEYLQNIIAQVR	416	//14	8//76	1.38825	0.538462	R.K[2097.15]NEYLVPVVM[147.04]ILK.A	4YM7_2_RPA2	1	RPA2	KNEYLVPVVMILK	266	126.127	17440.1	127.13	8725.88	18842.3	7784.84	0.413158	2.42038	1.27523
				-141	34.1674	JL033021_040221_RPA2HFH_Q2_1to10_100B.24279.24279.4	P	5.79075	0.19067	0.0171	//14	10//89	4.9595	1.1	K.EK[1827.06]IDEYLQNIIAQVR.M	4YM7_2_RPA2	1	RPA2	EKIDEYLQNIIAQVR	416	//14	8//76	0.83125	0.384615	R.K[2097.15]NEYLVPVVM[147.04]ILK.A	4YM7_2_RPA2	1	RPA2	KNEYLVPVVMILK	266	126.127	2810.08	127.13	18822.9	2894.35	19918	6.8817	0.145313	-2.78276
				-142	30.3635	JL033021_040221_RPA2HFH_Q2_1to2_D.23287.23287.4	P	5.7895	0.229233	5.21e-14	//14	9//89	4.723	1.06667	K.EK[1827.06]IDEYLQNIIAQVR.M	4YM7_2_RPA2	1	RPA2	EKIDEYLQNIIAQVR	416	//14	8//76	1.0665	0.461538	R.K[2097.15]NEYLVPVVM[147.04]ILK.A	4YM7_2_RPA2	1	RPA2	KNEYLVPVVMILK	266	126.127	8891.49	127.13	14939	9521.04	15210.2	1.59753	0.625966	-0.675845
				-141	31.2626	JL033021_040221_RPA2HFH_Q2_1to5_1ug.22278.22278.4	NP	5.78225	0.212442	3.68e-09	//14	10//89	4.2995	1.1	K.EK[1827.06]IDEYLQNIIAQVR.M	4YM7_2_RPA2	1	RPA2	EKIDEYLQNIIAQVR	416	//14	9//76	1.48275	0.692308	R.K[2097.15]NEYLVPVVM[147.04]ILK.A	4YM7_2_RPA2	1	RPA2	KNEYLVPVVMILK	266	126.126	8857.14	127.13	32336	9342.3	33855.5	3.62389	0.275946	-1.85754
				-141	28.4232	JL033021_040221_RPA2HFH_Q2_2to1_D.23229.23229.5	NP	5.77925	0.19672	1.03e-06	//14	11//116	4.41375	1.13333	K.EK[1827.06]IDEYLQNIIAQVR.M	4YM7_2_RPA2	1	RPA2	EKIDEYLQNIIAQVR	416	1//14	9//97	1.3655	0.5	R.K[2097.15]NEYLVPVVM[147.04]ILK.A	4YM7_2_RPA2	1	RPA2	KNEYLVPVVMILK	266	126.127	17984.5	127.13	7550.5	19442.2	6476.46	0.333114	3.00198	1.58591
				-141	25.3838	JL033021_040221_RPA2HFH_Q2_1to2_D.23074.23074.4	P	5.47625	0.23817	2.91e-09	//14	10//89	4.9215	1.1	K.EK[1827.06]IDEYLQNIIAQVR.M	4YM7_2_RPA2	1	RPA2	EKIDEYLQNIIAQVR	416	//14	6//76	0.55475	0.230769	R.K[2097.15]NEYLVPVVM[147.04]ILK.A	4YM7_2_RPA2	1	RPA2	KNEYLVPVVMILK	266	126.126	10797.8	127.13	15271.7	11585.6	15395.5	1.32885	0.752533	-0.410174
				-142	31.1935	JL033021_040221_RPA2HFH_Q2_1to5_D.23470.23470.4	P	5.4205	0.205567	1.63e-05	//14	12//89	4.932	1.16667	K.EK[1827.06]IDEYLQNIIAQVR.M	4YM7_2_RPA2	1	RPA2	EKIDEYLQNIIAQVR	416	//14	4//76	0.4885	0.153846	R.K[2097.15]NEYLVPVVM[147.04]ILK.A	4YM7_2_RPA2	1	RPA2	KNEYLVPVVMILK	266	126.127	8444.23	127.13	30370.1	8910.49	31786	3.56725	0.280328	-1.83481
				-142	26.9708	JL033021_040221_RPA2HFH_Q2_1to2_D.23113.23113.5	P	5.276	0.184318	8.77e-13	//14	11//116	4.18475	1.03333	K.EK[1827.06]IDEYLQNIIAQVR.M	4YM7_2_RPA2	1	RPA2	EKIDEYLQNIIAQVR	416	//14	6//97	1.09125	0.384615	R.K[2097.15]NEYLVPVVM[147.04]ILK.A	4YM7_2_RPA2	1	RPA2	KNEYLVPVVMILK	266	126.126	8255.84	127.13	12118.7	8854.64	12245.1	1.3829	0.723119	-0.467696
				-142	30.6402	JL033021_040221_RPA2HFH_Q2_1to2_100B.24027.24027.4	P	5.26925	0.186258	0.28	//14	10//89	4.3815	1	K.EK[1827.06]IDEYLQNIIAQVR.M	4YM7_2_RPA2	1	RPA2	EKIDEYLQNIIAQVR	416	//14	7//76	0.88775	0.346154	R.K[2097.15]NEYLVPVVM[147.04]ILK.A	4YM7_2_RPA2	1	RPA2	KNEYLVPVVMILK	266	126.127	9231.78	127.13	14357.3	9894.81	14556.3	1.4711	0.679763	-0.556897
				-142	29.6719	JL033021_040221_RPA2HFH_Q2_2to1_D.23151.23151.4	NP	5.21825	0.187984	1.16e-07	//14	12//89	4.21975	1.06667	K.EK[1827.06]IDEYLQNIIAQVR.M	4YM7_2_RPA2	1	RPA2	EKIDEYLQNIIAQVR	416	//14	7//76	0.9985	0.423077	R.K[2097.15]NEYLVPVVM[147.04]ILK.A	4YM7_2_RPA2	1	RPA2	KNEYLVPVVMILK	266	126.127	25752.5	127.13	13052.3	27821.6	11674.7	0.419628	2.38306	1.25282
				-141	25.3838	JL033021_040221_RPA2HFH_Q2_1to2_D.23070.23070.4	P	5.1035	0.213522	2.31e-09	//14	10//89	4.47575	1.1	K.EK[1827.06]IDEYLQNIIAQVR.M	4YM7_2_RPA2	1	RPA2	EKIDEYLQNIIAQVR	416	//14	5//76	0.62775	0.192308	R.K[2097.15]NEYLVPVVM[147.04]ILK.A	4YM7_2_RPA2	1	RPA2	KNEYLVPVVMILK	266	126.127	10619.5	127.13	17782.9	11371.9	18102.5	1.59186	0.628197	-0.670712
				-141	33.2683	JL033021_040221_RPA2HFH_Q2_2to1_100B.23890.23890.4	P	5.01925	0.182134	0.164	//14	9//89	4.4165	0.966667	K.EK[1827.06]IDEYLQNIIAQVR.M	4YM7_2_RPA2	1	RPA2	EKIDEYLQNIIAQVR	416	1//14	5//76	0.60275	0.192308	R.K[2097.15]NEYLVPVVM[147.04]ILK.A	4YM7_2_RPA2	1	RPA2	KNEYLVPVVMILK	266	126.127	16291.9	127.13	8838.3	17596.2	8008.4	0.455121	2.19722	1.13568
				-142	21.8565	JL033021_040221_RPA2HFH_Q2_1to10_100B.24262.24262.4	P	5.01725	0.167005	0.0663	//14	9//89	3.88125	0.866667	K.EK[1827.06]IDEYLQNIIAQVR.M	4YM7_2_RPA2	1	RPA2	EKIDEYLQNIIAQVR	416	//14	6//76	1.136	0.384615	R.K[2097.15]NEYLVPVVM[147.04]ILK.A	4YM7_2_RPA2	1	RPA2	KNEYLVPVVMILK	266	126.127	2713	127.13	16291.8	2809.66	17214.5	6.12689	0.163215	-2.61515
				-141	33.4375	JL033021_040221_RPA2HFH_Q2_1to5_100B.24553.24553.5	P	5.01275	0.205867	0.0021	//14	11//116	3.99525	1.03333	K.EK[1827.06]IDEYLQNIIAQVR.M	4YM7_2_RPA2	1	RPA2	EKIDEYLQNIIAQVR	416	//14	7//97	1.0175	0.423077	R.K[2097.15]NEYLVPVVM[147.04]ILK.A	4YM7_2_RPA2	1	RPA2	KNEYLVPVVMILK	266	126.127	3102.16	127.13	12560.6	3262.03	13181.3	4.04081	0.247475	-2.01464
				-145	31.4318	JL033021_040221_RPA2HFH_Q2_1to5_100B.24737.24737.5	P	4.98875	0.213944	0.000134	//14	11//116	4.02125	1	K.EK[1827.06]IDEYLQNIIAQVR.M	4YM7_2_RPA2	1	RPA2	EKIDEYLQNIIAQVR	416	//14	6//97	0.9675	0.307692	R.K[2097.15]NEYLVPVVM[147.04]ILK.A	4YM7_2_RPA2	1	RPA2	KNEYLVPVVMILK	266	126.127	2562.35	127.13	13047.2	2672.67	13751.1	5.14508	0.194361	-2.36319
				-143	30.3597	JL033021_040221_RPA2HFH_Q2_1to2_100B.24041.24041.5	P	4.931	0.170287	0.0535	1//14	10//116	4.29575	1	K.EK[1827.06]IDEYLQNIIAQVR.M	4YM7_2_RPA2	1	RPA2	EKIDEYLQNIIAQVR	416	//14	5//97	0.63525	0.192308	R.K[2097.15]NEYLVPVVM[147.04]ILK.A	4YM7_2_RPA2	1	RPA2	KNEYLVPVVMILK	266	126.126	7449.85	127.13	10979.2	7989.83	11096.3	1.3888	0.720047	-0.473838
				-144	26.3521	JL033021_040221_RPA2HFH_Q2_1to2_1ug.22300.22300.4	NP	4.80225	0.17238	4.17e-06	//14	10//89	3.94525	1.1	K.EK[1827.06]IDEYLQNIIAQVR.M	4YM7_2_RPA2	1	RPA2	EKIDEYLQNIIAQVR	416	1//14	8//76	0.857	0.461538	R.K[2097.15]NEYLVPVVM[147.04]ILK.A	4YM7_2_RPA2	1	RPA2	KNEYLVPVVMILK	266	126.126	16604.3	127.13	29125.8	17769.9	29720.1	1.67249	0.597909	-0.742001
				-142	27.8045	JL033021_040221_RPA2HFH_Q2_1to2_100B.24168.24168.4	P	4.736	0.180409	0.0894	//14	9//89	4.09275	0.966667	K.EK[1827.06]IDEYLQNIIAQVR.M	4YM7_2_RPA2	1	RPA2	EKIDEYLQNIIAQVR	416	//14	5//76	0.64325	0.192308	R.K[2097.15]NEYLVPVVM[147.04]ILK.A	4YM7_2_RPA2	1	RPA2	KNEYLVPVVMILK	266	126.126	8187.67	127.13	12238	8779.74	12379	1.40995	0.709247	-0.49564
				-142	27.0437	JL033021_040221_RPA2HFH_Q2_1to10_1ug.22389.22389.4	NP	4.71625	0.160901	6.51e-06	//14	10//89	3.44875	1	K.EK[1827.06]IDEYLQNIIAQVR.M	4YM7_2_RPA2	1	RPA2	EKIDEYLQNIIAQVR	416	//14	8//76	1.2675	0.692308	R.K[2097.15]NEYLVPVVM[147.04]ILK.A	4YM7_2_RPA2	1	RPA2	KNEYLVPVVMILK	266	126.127	6469.81	127.13	34651.5	6734.47	36551	5.42746	0.184248	-2.44028
				-142	30.7785	JL033021_040221_RPA2HFH_Q2_5to1_1ug.22197.22197.4	P	4.6835	0.175238	4.18e-07	//14	9//89	3.86	0.966667	K.EK[1827.06]IDEYLQNIIAQVR.M	4YM7_2_RPA2	1	RPA2	EKIDEYLQNIIAQVR	416	//14	7//76	0.8235	0.346154	R.K[2097.15]NEYLVPVVM[147.04]ILK.A	4YM7_2_RPA2	1	RPA2	KNEYLVPVVMILK	266	126.127	35221.7	127.13	10628.4	38110.4	8227.23	0.215879	4.63223	2.21171
				-144	26.2137	JL033021_040221_RPA2HFH_Q2_1to5_100B.24472.24472.4	P	4.36	0.157327	0.0249	//14	8//89	3.7755	0.833333	K.EK[1827.06]IDEYLQNIIAQVR.M	4YM7_2_RPA2	1	RPA2	EKIDEYLQNIIAQVR	416	//14	3//76	0.5845	0.192308	R.K[2097.15]NEYLVPVVM[147.04]ILK.A	4YM7_2_RPA2	1	RPA2	KNEYLVPVVMILK	266	126.127	5963.7	127.13	17242.2	6327.21	17941	2.83553	0.352668	-1.50362
				-143	27.7353	JL033021_040221_RPA2HFH_Q2_2to1_100B.24072.24072.4	P	3.774	0.134082	0.0972	//14	6//89	3.385	0.666667	K.EK[1827.06]IDEYLQNIIAQVR.M	4YM7_2_RPA2	1	RPA2	EKIDEYLQNIIAQVR	416	//14	3//76	0.389	0.115385	R.K[2097.15]NEYLVPVVM[147.04]ILK.A	4YM7_2_RPA2	1	RPA2	KNEYLVPVVMILK	266	126.127	14752.5	127.13	7931.91	15934.1	7175.31	0.450311	2.22069	1.15101
				-142	26.3521	JL033021_040221_RPA2HFH_Q2_2to1_D.23350.23350.4	P	3.61675	0.130524	0.0033	//14	8//89	3.1	0.933333	K.EK[1827.06]IDEYLQNIIAQVR.M	4YM7_2_RPA2	1	RPA2	EKIDEYLQNIIAQVR	416	//14	5//76	0.51675	0.269231	R.K[2097.15]NEYLVPVVM[147.04]ILK.A	4YM7_2_RPA2	1	RPA2	KNEYLVPVVMILK	266	126.127	20380.1	127.13	10782.3	22013.9	9724.49	0.441742	2.26376	1.17872
				-141	26.9745	JL033021_040221_RPA2HFH_Q2_1to5_100B.24469.24469.4	P	3.5865	0.130997	0.0278	//14	7//89	3.0455	0.666667	K.EK[1827.06]IDEYLQNIIAQVR.M	4YM7_2_RPA2	1	RPA2	EKIDEYLQNIIAQVR	416	//14	4//76	0.541	0.153846	R.K[2097.15]NEYLVPVVM[147.04]ILK.A	4YM7_2_RPA2	1	RPA2	KNEYLVPVVMILK	266	126.127	4747.43	127.13	17217.2	5008.4	18023.5	3.59865	0.277882	-1.84746
				-141	19.9199	JL033021_040221_RPA2HFH_Q2_1to10_D.23437.23437.4	P	3.3785	0.118567	9.86e-07	//14	9//89	2.8365	0.966667	K.EK[1827.06]IDEYLQNIIAQVR.M	4YM7_2_RPA2	1	RPA2	EKIDEYLQNIIAQVR	416	//14	5//76	0.542	0.192308	R.K[2097.15]NEYLVPVVM[147.04]ILK.A	4YM7_2_RPA2	1	RPA2	KNEYLVPVVMILK	266	126.127	7083.36	127.13	42504	7335.98	44910.6	6.12196	0.163346	-2.61399
				-142	22.3887	JL033021_040221_RPA2HFH_Q2_1to2_D.23293.23293.5	P	2.89275	0.110676	0.00139	//14	6//116	1.99825	0.433333	K.EK[1827.06]IDEYLQNIIAQVR.M	4YM7_2_RPA2	1	RPA2	EKIDEYLQNIIAQVR	416	//14	4//97	0.8945	0.230769	R.K[2097.15]NEYLVPVVM[147.04]ILK.A	4YM7_2_RPA2	1	RPA2	KNEYLVPVVMILK	266	126.126	7505.6	127.13	9968.57	8058.51	10008.3	1.24196	0.80518	-0.312616
	7	RPA2:266---RPA2:513	2.16125
				-143	29.9553	JL033021_040221_RPA2HFH_Q2_2to1_100B.20552.20552.5	P	2.16125	0.0680955	0.0809	//14	8//100	1.81975	0.692308	R.K[1720.95]NEYLVPVVM[147.04]ILK.A	4YM7_2_RPA2	1	RPA2	KNEYLVPVVMILK	266	//15	2//93	0.3415	0.153846	R.GSFFAQLK[1827.06]TTTVR.K	4YM7_2_RPA2	1	RPA2	GSFFAQLKTTTVR	513	126.127	28823.5	127.13	13490.7	31148.4	11868.9	0.381042	2.62438	1.39198
				-142	33.3227	JL033021_040221_RPA2HFH_Q2_1to2_100B.20614.20614.5	P	1.5695	0.0520296	0.0108	//14	7//100	1.4365	0.5	R.K[1720.95]NEYLVPVVM[147.04]ILK.A	4YM7_2_RPA2	1	RPA2	KNEYLVPVVMILK	266	//15	2//93	0.133	0.0769231	R.GSFFAQLK[1827.06]TTTVR.K	4YM7_2_RPA2	1	RPA2	GSFFAQLKTTTVR	513	126.127	12737.9	127.13	19226.3	13657.5	19459.1	1.4248	0.701855	-0.510755
				-141	31.6626	JL033021_040221_RPA2HFH_Q2_5to1_100B.20687.20687.4	P	1.561	0.0616899	0.501	//14	9//79	1.51875	0.692308	R.K[1720.95]NEYLVPVVM[147.04]ILK.A	4YM7_2_RPA2	1	RPA2	KNEYLVPVVMILK	266	//15	2//71	0.04225	0.0769231	R.GSFFAQLK[1827.06]TTTVR.K	4YM7_2_RPA2	1	RPA2	GSFFAQLKTTTVR	513	126.127	34847.8	127.13	9233.51	37716.2	6766.07	0.179394	5.57432	2.4788
	8	RPA2:314---RPA2:443	0.70175
				-140	24.472	JL033021_040221_RPA2HFH_Q2_10to1_100B.26965.26965.4	P	0.70175	0.0201902	0.235	//16	1//79	0.03225	0.0357143	R.GM[147.04]AINFKDK[1809.02]RYM[147.04]SR.V	4YM7_2_RPA2	1	RPA2	GMAINFKDKRYMSR	443	//14	5//66	0.6695	0.291667	R.GFK[2014.01]KRYPHLQNR.T	4YM7_2_RPA2	1	RPA2	GFKKRYPHLQNR	314	126.127	3524.58	127.13	2715.2	3800.22	2593.14	0.682367	1.46549	0.551381
				-141	24.116	JL033021_040221_RPA2HFH_Q2_10to1_100B.27003.27003.4	P	0.5245	0.0165429	0.158	//16	//79	0	0	R.GM[147.04]AINFKDK[1809.02]RYM[147.04]SR.V	4YM7_2_RPA2	1	RPA2	GMAINFKDKRYMSR	443	//14	3//66	0.5245	0.125	R.GFK[2014.01]KRYPHLQNR.T	4YM7_2_RPA2	1	RPA2	GFKKRYPHLQNR	314	126.126	3943.72	127.13	2329.98	4257.9	2142.73	0.503236	1.98714	0.990694
				-143	28.1034	JL033021_040221_RPA2HFH_Q2_10to1_100B.26747.26747.4	P	0.50225	0.018955	0.174	//16	//79	0	0	R.GM[147.04]AINFKDK[1809.02]RYM[147.04]SR.V	4YM7_2_RPA2	1	RPA2	GMAINFKDKRYMSR	443	//14	3//66	0.50225	0.125	R.GFK[2014.01]KRYPHLQNR.T	4YM7_2_RPA2	1	RPA2	GFKKRYPHLQNR	314	126.127	4152.57	127.131	1443.58	4491.59	1174.12	0.261405	3.82548	1.93564
	9	RPA2:30---RPA2:930	5.097
				-141	28.1596	JL033021_040221_RPA2HFH_Q2_1to10_D.19131.19131.6	P	5.097	0.182286	0.0332	//16	20//240	4.7965	0.696429	R.K[2095.14]WPTIDM[147.04]PFSETGIQPDIIINPHAFPSR.M	4YM7_2_RPA2	1	RPA2	KWPTIDMPFSETGIQPDIIINPHAFPSR	930	//16	4//113	0.3005	0.133333	R.TLERESRFINPPK[3488.78]DK.S	4YM7_2_RPA2	1	RPA2	TLERESRFINPPKDK	30	126.127	8412.94	127.13	61246.6	8625.42	64875.5	7.52142	0.132954	-2.91101
	10	RPA2:916---RPA2:924	5.86675
				0	1.34753	JL033021_040221_RPA2HFH_Q2_5to1_100B.08625.08625.4	N	5.86675	0.179703		//11	7//40	1.381	1.0625	R.HGQK[1641.9]GVC[160.03]SR.K	4YM7_2_RPA2	1	RPA2	HGQKGVCSR	924	1//13	16//51	4.48575	1.85	R.TPQIGDK[1434.76]FSSR.H	4YM7_2_RPA2	1	RPA2	TPQIGDKFSSR	916	126.127	120502	127.131	23405.9	130491	14263.6	0.109307	9.14853	3.19354
				0	5.28635	JL033021_040221_RPA2HFH_Q2_5to1_100B.08456.08456.4	N	3.96275	0.17666		//11	6//40	1.158	1	R.HGQK[1641.91]GVC[160.03]SR.K	4YM7_2_RPA2	1	RPA2	HGQKGVCSR	924	1//13	9//51	2.80475	0.95	R.TPQIGDK[1434.77]FSSR.H	4YM7_2_RPA2	1	RPA2	TPQIGDKFSSR	916	126.127	83276.4	127.13	17736.6	90166.4	11530.3	0.127878	7.81996	2.96716
				-141	37.9555	JL033021_040221_RPA2HFH_Q2_2to1_100B.08893.08893.5	P	1.83275	0.077832	0.364	//14	8//86	1.1035	0.666667	R.RTPQIGDK[1293.66]FSSR.H	4YM7_2_RPA2	1	RPA2	RTPQIGDKFSSR	916	//11	4//53	0.72925	0.5	R.HGQK[1656.89]GVC[160.03]SR.K	4YM7_2_RPA2	1	RPA2	HGQKGVCSR	924	126.127	144436	127.13	54338	156194	45261.2	0.289775	3.45096	1.787
				-141	44.6988	JL033021_040221_RPA2HFH_Q2_2to1_100B.08482.08482.5	P	1.7515	0.0634062	0.114	//13	7//75	0.77475	0.636364	R.TPQIGDK[1293.66]FSSR.H	4YM7_2_RPA2	1	RPA2	TPQIGDKFSSR	916	//11	8//55	0.97675	0.833333	R.HGQK[1500.79]GVC[160.03]SR.K	4YM7_2_RPA2	1	RPA2	HGQKGVCSR	924	126.127	172969	127.13	65897.7	187044	55086.8	0.294513	3.39544	1.7636
				-141	42.9823	JL033021_040221_RPA2HFH_Q2_10to1_100B.08404.08404.5	P	1.53975	0.0603776	0.232	//13	5//75	0.5725	0.545455	R.TPQIGDK[1293.66]FSSR.H	4YM7_2_RPA2	1	RPA2	TPQIGDKFSSR	916	//11	7//55	0.96725	0.777778	R.HGQK[1500.79]GVC[160.03]SR.K	4YM7_2_RPA2	1	RPA2	HGQKGVCSR	924	126.127	151905	127.13	23208.7	164547	11233.1	0.068267	14.6484	3.87267
				-141	37.5974	JL033021_040221_RPA2HFH_Q2_10to1_100B.08621.08621.5	P	1.391	0.0578282	0.308	//14	8//86	0.829	0.625	R.RTPQIGDK[1293.66]FSSR.H	4YM7_2_RPA2	1	RPA2	RTPQIGDKFSSR	916	//11	4//53	0.562	0.5	R.HGQK[1656.89]GVC[160.03]SR.K	4YM7_2_RPA2	1	RPA2	HGQKGVCSR	924	126.127	112627	127.13	13906.6	122027	4791.26	0.0392639	25.4687	4.67065
				-141	38.1943	JL033021_040221_RPA2HFH_Q2_10to1_100B.08626.08626.5	P	1.35875	0.0568967	0.185	//14	6//86	0.45575	0.333333	R.RTPQIGDK[1293.66]FSSR.H	4YM7_2_RPA2	1	RPA2	RTPQIGDKFSSR	916	//11	6//53	0.903	0.944444	R.HGQK[1656.89]GVC[160.03]SR.K	4YM7_2_RPA2	1	RPA2	HGQKGVCSR	924	126.127	110242	127.13	15900.9	119425	7142.35	0.0598061	16.7207	4.06356
				-141	40.3432	JL033021_040221_RPA2HFH_Q2_10to1_100B.08357.08357.4	NP	1.29925	0.0491675	0.248	1//13	8//60	0.975	0.818182	R.TPQIGDK[1293.66]FSSR.H	4YM7_2_RPA2	1	RPA2	TPQIGDKFSSR	916	//11	5//45	0.32425	0.388889	R.HGQK[1500.79]GVC[160.03]SR.K	4YM7_2_RPA2	1	RPA2	HGQKGVCSR	924	126.127	93074.6	127.131	14782.5	100816	7485.07	0.0742446	13.469	3.75157
				-141	41.4176	JL033021_040221_RPA2HFH_Q2_10to1_100B.08803.08803.5	P	1.29875	0.0630339	0.139	//14	6//86	0.55075	0.416667	R.RTPQIGDK[1293.66]FSSR.H	4YM7_2_RPA2	1	RPA2	RTPQIGDKFSSR	916	1//11	6//53	0.748	0.611111	R.HGQK[1656.89]GVC[160.03]SR.K	4YM7_2_RPA2	1	RPA2	HGQKGVCSR	924	126.126	137080	127.13	19720.4	148499	8825.97	0.0594347	16.8252	4.07255
				-141	37.9555	JL033021_040221_RPA2HFH_Q2_10to1_100B.08438.08438.5	P	1.2465	0.0460141	0.282	//14	7//86	0.74875	0.375	R.RTPQIGDK[1293.66]FSSR.H	4YM7_2_RPA2	1	RPA2	RTPQIGDKFSSR	916	//11	3//53	0.49775	0.277778	R.HGQK[1656.89]GVC[160.03]SR.K	4YM7_2_RPA2	1	RPA2	HGQKGVCSR	924	126.127	95848.1	127.131	16342.2	103811	8907.47	0.0858043	11.6544	3.54281
				-141	36.4036	JL033021_040221_RPA2HFH_Q2_5to1_100B.08799.08799.5	P	1.15225	0.0447154	0.479	//14	6//86	0.538	0.333333	R.RTPQIGDK[1293.66]FSSR.H	4YM7_2_RPA2	1	RPA2	RTPQIGDKFSSR	916	//11	4//53	0.61425	0.5	R.HGQK[1656.89]GVC[160.03]SR.K	4YM7_2_RPA2	1	RPA2	HGQKGVCSR	924	126.126	123840	127.13	24893.4	134098	15557.9	0.116018	8.61933	3.10758
				-141	40.4626	JL033021_040221_RPA2HFH_Q2_5to1_100B.08971.08971.5	P	0.942	0.0366252	0.324	//14	7//86	0.72425	0.375	R.RTPQIGDK[1293.66]FSSR.H	4YM7_2_RPA2	1	RPA2	RTPQIGDKFSSR	916	//11	5//53	0.21775	0.277778	R.HGQK[1656.89]GVC[160.03]SR.K	4YM7_2_RPA2	1	RPA2	HGQKGVCSR	924	126.127	177560	127.13	34739.1	192276	21285.7	0.110704	9.0331	3.17522
				-141	38.6718	JL033021_040221_RPA2HFH_Q2_10to1_100B.08799.08799.5	P	0.68225	0.0348977	0.0967	//14	6//86	0.4225	0.333333	R.RTPQIGDK[1293.66]FSSR.H	4YM7_2_RPA2	1	RPA2	RTPQIGDKFSSR	916	//11	4//53	0.25975	0.222222	R.HGQK[1656.89]GVC[160.03]SR.K	4YM7_2_RPA2	1	RPA2	HGQKGVCSR	924	126.126	133709	127.13	19937.6	144841	9361.36	0.0646319	15.4722	3.95161
				370	2.55537	JL033021_040221_RPA2HFH_Q2_10to1_100B.08539.08539.4	P	0.5185	0.0254578	0.318	//13	3//60	0.3385	0.363636	R.TPQIGDK[1293.66]FSSR.H	4YM7_2_RPA2	1	RPA2	TPQIGDKFSSR	916	//11	2//45	0.18	0.222222	R.HGQK[1500.79]GVC[160.03]SR.K	4YM7_2_RPA2	1	RPA2	HGQKGVCSR	924	126.127	111776	127.13	17977.7	121072	9230.09	0.0762366	13.1171	3.71337
	11	RPA2:916---RPA2:930	15.5828
				-142	22.7878	JL033021_040221_RPA2HFH_Q2_1to1_1ug.18483.18483.5	P	15.5828	0.421828	0.000776	//16	36//245	15.1675	2.03571	R.K[1500.79]WPTIDM[147.04]PFSETGIQPDIIINPHAFPSR.M	4YM7_2_RPA2	1	RPA2	KWPTIDMPFSETGIQPDIIINPHAFPSR	930	//13	5//71	0.41525	0.318182	R.TPQIGDK[3488.78]FSSR.H	4YM7_2_RPA2	1	RPA2	TPQIGDKFSSR	916	126.127	41710.2	127.13	35876.6	44941.6	34700.3	0.772119	1.29514	0.373106
				-141	18.7235	JL033021_040221_RPA2HFH_Q2_5to1_100B.20100.20100.5	P	14.904	0.387358	0.00286	//16	32//245	14.5095	1.89286	R.K[1500.79]WPTIDM[147.04]PFSETGIQPDIIINPHAFPSR.M	4YM7_2_RPA2	1	RPA2	KWPTIDMPFSETGIQPDIIINPHAFPSR	930	//13	5//71	0.3945	0.318182	R.TPQIGDK[3488.78]FSSR.H	4YM7_2_RPA2	1	RPA2	TPQIGDKFSSR	916	126.127	53397.9	127.13	12432.8	57807.3	8529.06	0.147543	6.77769	2.76079
				-142	28.2335	JL033021_040221_RPA2HFH_Q2_5to1_1ug.18527.18527.5	P	14.4955	0.398957	2.24e-08	//16	32//245	14.0565	1.83929	R.K[1500.79]WPTIDM[147.04]PFSETGIQPDIIINPHAFPSR.M	4YM7_2_RPA2	1	RPA2	KWPTIDMPFSETGIQPDIIINPHAFPSR	930	//13	5//71	0.439	0.318182	R.TPQIGDK[3488.78]FSSR.H	4YM7_2_RPA2	1	RPA2	TPQIGDKFSSR	916	126.127	69137.5	127.13	15929	74847.9	10862.6	0.145129	6.89042	2.78459
				-141	20.8723	JL033021_040221_RPA2HFH_Q2_1to1_1ug.18496.18496.6	P	13.6203	0.437458	0.0253	//16	32//245	13.322	1.83929	R.K[1500.79]WPTIDM[147.04]PFSETGIQPDIIINPHAFPSR.M	4YM7_2_RPA2	1	RPA2	KWPTIDMPFSETGIQPDIIINPHAFPSR	930	//13	5//71	0.29825	0.318182	R.TPQIGDK[3488.78]FSSR.H	4YM7_2_RPA2	1	RPA2	TPQIGDKFSSR	916	126.126	47526.1	127.13	37744.4	51233.6	36179.7	0.706171	1.41609	0.50191
				-142	22.1237	JL033021_040221_RPA2HFH_Q2_1to10_1ug.18636.18636.5	P	13.494	0.372069	0.211	//16	33//245	13.1197	1.80357	R.K[1500.79]WPTIDM[147.04]PFSETGIQPDIIINPHAFPSR.M	4YM7_2_RPA2	1	RPA2	KWPTIDMPFSETGIQPDIIINPHAFPSR	930	1//13	5//71	0.37425	0.318182	R.TPQIGDK[3488.78]FSSR.H	4YM7_2_RPA2	1	RPA2	TPQIGDKFSSR	916	126.127	10260.2	127.13	58195.2	10653.6	61439.8	5.76705	0.173399	-2.52783
				-141	21.8448	JL033021_040221_RPA2HFH_Q2_1to2_100B.19962.19962.5	P	13.4275	0.348861	0.00288	//16	33//245	13.167	1.76786	R.K[1500.79]WPTIDM[147.04]PFSETGIQPDIIINPHAFPSR.M	4YM7_2_RPA2	1	RPA2	KWPTIDMPFSETGIQPDIIINPHAFPSR	930	//13	4//71	0.2605	0.272727	R.TPQIGDK[3488.78]FSSR.H	4YM7_2_RPA2	1	RPA2	TPQIGDKFSSR	916	126.127	28163.7	127.13	45887.4	30169.5	46643.7	1.54606	0.646806	-0.628595
				-141	23.024	JL033021_040221_RPA2HFH_Q2_10to1_1ug.18587.18587.6	P	13.1602	0.411438	0.00985	//16	32//245	12.9027	1.71429	R.K[1500.79]WPTIDM[147.04]PFSETGIQPDIIINPHAFPSR.M	4YM7_2_RPA2	1	RPA2	KWPTIDMPFSETGIQPDIIINPHAFPSR	930	//13	4//71	0.2575	0.272727	R.TPQIGDK[3488.78]FSSR.H	4YM7_2_RPA2	1	RPA2	TPQIGDKFSSR	916	126.127	80983.9	127.13	17400.5	87683	11375.9	0.129739	7.70778	2.94632
				-143	23.1332	JL033021_040221_RPA2HFH_Q2_2to1_1ug.18594.18594.5	P	12.9253	0.376873	0.000492	//16	32//245	12.6542	1.75	R.K[1500.79]WPTIDM[147.04]PFSETGIQPDIIINPHAFPSR.M	4YM7_2_RPA2	1	RPA2	KWPTIDMPFSETGIQPDIIINPHAFPSR	930	//13	4//71	0.271	0.272727	R.TPQIGDK[3488.78]FSSR.H	4YM7_2_RPA2	1	RPA2	TPQIGDKFSSR	916	126.127	66620.4	127.13	27711.1	72022.4	23714	0.329258	3.03713	1.60271
				-141	23.024	JL033021_040221_RPA2HFH_Q2_10to1_1ug.18597.18597.6	P	12.528	0.395031	0.00108	//16	31//245	12.2855	1.57143	R.K[1500.79]WPTIDM[147.04]PFSETGIQPDIIINPHAFPSR.M	4YM7_2_RPA2	1	RPA2	KWPTIDMPFSETGIQPDIIINPHAFPSR	930	//13	5//71	0.2425	0.318182	R.TPQIGDK[3488.78]FSSR.H	4YM7_2_RPA2	1	RPA2	TPQIGDKFSSR	916	126.127	96397.1	127.131	18387.4	104390	11049.7	0.10585	9.44731	3.2399
				-141	25.5638	JL033021_040221_RPA2HFH_Q2_1to1_100B.20210.20210.5	P	12.2223	0.3717	8.44e-06	//16	29//245	11.9255	1.57143	R.K[1500.79]WPTIDM[147.04]PFSETGIQPDIIINPHAFPSR.M	4YM7_2_RPA2	1	RPA2	KWPTIDMPFSETGIQPDIIINPHAFPSR	930	//13	5//71	0.29675	0.318182	R.TPQIGDK[3488.78]FSSR.H	4YM7_2_RPA2	1	RPA2	TPQIGDKFSSR	916	126.127	26519.6	127.13	21498	28584.9	20656.2	0.722625	1.38384	0.46868
				-141	21.6693	JL033021_040221_RPA2HFH_Q2_1to10_1ug.18630.18630.6	P	11.793	0.383419	4.02e-05	//16	29//245	11.2257	1.44643	R.K[1500.79]WPTIDM[147.04]PFSETGIQPDIIINPHAFPSR.M	4YM7_2_RPA2	1	RPA2	KWPTIDMPFSETGIQPDIIINPHAFPSR	930	//13	6//71	0.56725	0.636364	R.TPQIGDK[3488.78]FSSR.H	4YM7_2_RPA2	1	RPA2	TPQIGDKFSSR	916	126.127	9836.64	127.13	56878.3	10204.9	60066.6	5.88605	0.169893	-2.5573
				-142	26.3977	JL033021_040221_RPA2HFH_Q2_1to5_1ug.18596.18596.6	P	11.7543	0.382122	7.11e-05	//16	29//245	11.3915	1.42857	R.K[1500.79]WPTIDM[147.04]PFSETGIQPDIIINPHAFPSR.M	4YM7_2_RPA2	1	RPA2	KWPTIDMPFSETGIQPDIIINPHAFPSR	930	//13	6//71	0.36275	0.363636	R.TPQIGDK[3488.78]FSSR.H	4YM7_2_RPA2	1	RPA2	TPQIGDKFSSR	916	126.127	12871.7	127.13	47350.7	13573.9	49584.6	3.65294	0.273752	-1.86906
				-142	23.449	JL033021_040221_RPA2HFH_Q2_1to10_1ug.18669.18669.6	P	11.2643	0.357839	4.12e-05	//16	26//245	10.8528	1.35714	R.K[1500.79]WPTIDM[147.04]PFSETGIQPDIIINPHAFPSR.M	4YM7_2_RPA2	1	RPA2	KWPTIDMPFSETGIQPDIIINPHAFPSR	930	//13	6//71	0.4115	0.5	R.TPQIGDK[3488.78]FSSR.H	4YM7_2_RPA2	1	RPA2	TPQIGDKFSSR	916	126.126	9177.24	127.13	58640	9475.48	62013.7	6.54464	0.152797	-2.71031
				-141	23.5701	JL033021_040221_RPA2HFH_Q2_1to2_1ug.18027.18027.6	P	11.2528	0.317166	0.0126	1//16	29//243	10.5747	1.53571	R.K[1656.89]WPTIDM[147.04]PFSETGIQPDIIINPHAFPSR.M	4YM7_2_RPA2	1	RPA2	KWPTIDMPFSETGIQPDIIINPHAFPSR	930	2//14	8//83	0.678	0.416667	R.RTPQIGDK[3488.78]FSSR.H	4YM7_2_RPA2	1	RPA2	RTPQIGDKFSSR	916	126.127	32045.6	127.13	50971	34337.9	51742.8	1.50687	0.663626	-0.591557
				-141	20.5536	JL033021_040221_RPA2HFH_Q2_5to1_1ug.18512.18512.6	P	10.9727	0.342818	2.29e-06	//16	27//245	10.7583	1.375	R.K[1500.79]WPTIDM[147.04]PFSETGIQPDIIINPHAFPSR.M	4YM7_2_RPA2	1	RPA2	KWPTIDMPFSETGIQPDIIINPHAFPSR	930	//13	4//71	0.2145	0.272727	R.TPQIGDK[3488.78]FSSR.H	4YM7_2_RPA2	1	RPA2	TPQIGDKFSSR	916	126.127	67461.6	127.13	18260.9	73011.5	13511.8	0.185064	5.40354	2.43391
				-143	27.1178	JL033021_040221_RPA2HFH_Q2_1to5_100B.20076.20076.5	P	10.7833	0.279019	0.00227	//16	30//245	10.4588	1.46429	R.K[1500.79]WPTIDM[147.04]PFSETGIQPDIIINPHAFPSR.M	4YM7_2_RPA2	1	RPA2	KWPTIDMPFSETGIQPDIIINPHAFPSR	930	//13	3//71	0.3245	0.227273	R.TPQIGDK[3488.78]FSSR.H	4YM7_2_RPA2	1	RPA2	TPQIGDKFSSR	916	126.127	14085.9	127.13	48672.7	14879.9	50892.2	3.42021	0.29238	-1.77408
				-142	23.449	JL033021_040221_RPA2HFH_Q2_1to10_100B.19898.19898.6	P	10.649	0.341522	0.0766	//16	32//245	10.4595	1.46429	R.K[1500.79]WPTIDM[147.04]PFSETGIQPDIIINPHAFPSR.M	4YM7_2_RPA2	1	RPA2	KWPTIDMPFSETGIQPDIIINPHAFPSR	930	//13	4//71	0.1895	0.272727	R.TPQIGDK[3488.78]FSSR.H	4YM7_2_RPA2	1	RPA2	TPQIGDKFSSR	916	126.127	10332.1	127.13	51448.9	10786.4	54204.2	5.02524	0.198996	-2.32919
				-142	21.4377	JL033021_040221_RPA2HFH_Q2_5to1_1ug.17955.17955.6	P	10.482	0.299135	0.00461	1//16	32//243	10.18	1.60714	R.K[1656.89]WPTIDM[147.04]PFSETGIQPDIIINPHAFPSR.M	4YM7_2_RPA2	1	RPA2	KWPTIDMPFSETGIQPDIIINPHAFPSR	930	1//14	5//83	0.302	0.208333	R.RTPQIGDK[3488.78]FSSR.H	4YM7_2_RPA2	1	RPA2	RTPQIGDKFSSR	916	126.127	67458.2	127.13	14936.5	73034.9	9949.73	0.136233	7.34039	2.87586
				-142	18.6675	JL033021_040221_RPA2HFH_Q2_10to1_1ug.18582.18582.6	P	10.2728	0.335464	0.296	//16	28//245	9.9775	1.33929	R.K[1500.79]WPTIDM[147.04]PFSETGIQPDIIINPHAFPSR.M	4YM7_2_RPA2	1	RPA2	KWPTIDMPFSETGIQPDIIINPHAFPSR	930	//13	4//71	0.29525	0.272727	R.TPQIGDK[3488.78]FSSR.H	4YM7_2_RPA2	1	RPA2	TPQIGDKFSSR	916	126.127	82545.5	127.13	17002.4	89379.7	10809.1	0.120935	8.26893	3.0477
				-142	25.6804	JL033021_040221_RPA2HFH_Q2_1to2_1ug.18574.18574.6	P	9.96575	0.320447	0.000159	//16	26//245	9.621	1.23214	R.K[1500.79]WPTIDM[147.04]PFSETGIQPDIIINPHAFPSR.M	4YM7_2_RPA2	1	RPA2	KWPTIDMPFSETGIQPDIIINPHAFPSR	930	//13	6//71	0.34475	0.363636	R.TPQIGDK[3488.78]FSSR.H	4YM7_2_RPA2	1	RPA2	TPQIGDKFSSR	916	126.126	21718.8	127.13	34143.4	23275.7	34637.7	1.48815	0.671975	-0.57352
				-143	21.4634	JL033021_040221_RPA2HFH_Q2_5to1_1ug.17972.17972.6	P	9.6055	0.268685	0.000462	1//16	31//243	9.20675	1.41071	R.K[1656.89]WPTIDM[147.04]PFSETGIQPDIIINPHAFPSR.M	4YM7_2_RPA2	1	RPA2	KWPTIDMPFSETGIQPDIIINPHAFPSR	930	1//14	6//83	0.39875	0.333333	R.RTPQIGDK[3488.78]FSSR.H	4YM7_2_RPA2	1	RPA2	RTPQIGDKFSSR	916	126.126	59336.8	127.13	14534.3	64230.7	10247.9	0.159548	6.26771	2.64794
				-142	27.354	JL033021_040221_RPA2HFH_Q2_1to10_100B.19968.19968.6	P	9.2545	0.293426	0.0408	//16	26//245	9.0635	1.21429	R.K[1500.79]WPTIDM[147.04]PFSETGIQPDIIINPHAFPSR.M	4YM7_2_RPA2	1	RPA2	KWPTIDMPFSETGIQPDIIINPHAFPSR	930	//13	4//71	0.191	0.181818	R.TPQIGDK[3488.78]FSSR.H	4YM7_2_RPA2	1	RPA2	TPQIGDKFSSR	916	126.127	9924.16	127.13	61681.2	10260.8	65205.5	6.35484	0.15736	-2.66786
				-143	32.485	JL033021_040221_RPA2HFH_Q2_2to1_100B.19237.19237.6	P	9.20225	0.263343	0.0626	//16	26//243	8.9035	1.26786	R.K[1656.89]WPTIDM[147.04]PFSETGIQPDIIINPHAFPSR.M	4YM7_2_RPA2	1	RPA2	KWPTIDMPFSETGIQPDIIINPHAFPSR	930	1//14	6//83	0.29875	0.25	R.RTPQIGDK[3488.78]FSSR.H	4YM7_2_RPA2	1	RPA2	RTPQIGDKFSSR	916	126.127	72202.4	127.13	33198	78031.3	29092.5	0.372831	2.68218	1.4234
				-143	26.1851	JL033021_040221_RPA2HFH_Q2_2to1_100B.19968.19968.6	P	9.1255	0.270851	0.176	//16	29//245	9.04	1.30357	R.K[1500.79]WPTIDM[147.04]PFSETGIQPDIIINPHAFPSR.M	4YM7_2_RPA2	1	RPA2	KWPTIDMPFSETGIQPDIIINPHAFPSR	930	//13	2//71	0.0855	0.0909091	R.TPQIGDK[3488.78]FSSR.H	4YM7_2_RPA2	1	RPA2	TPQIGDKFSSR	916	126.127	52732.2	127.13	24553.7	56986.7	21577.4	0.378639	2.64104	1.40111
				-142	26.4773	JL033021_040221_RPA2HFH_Q2_1to5_100B.20023.20023.6	P	8.8525	0.243951	0.0226	//16	24//245	8.725	1.08929	R.K[1500.79]WPTIDM[147.04]PFSETGIQPDIIINPHAFPSR.M	4YM7_2_RPA2	1	RPA2	KWPTIDMPFSETGIQPDIIINPHAFPSR	930	//13	3//71	0.1275	0.136364	R.TPQIGDK[3488.78]FSSR.H	4YM7_2_RPA2	1	RPA2	TPQIGDKFSSR	916	126.127	13868.8	127.13	46622.1	14661	48714.3	3.32271	0.300959	-1.73236
				-143	23.3162	JL033021_040221_RPA2HFH_Q2_1to2_100B.20000.20000.6	P	8.61125	0.255243	0.146	//16	26//245	8.31975	1.16071	R.K[1500.79]WPTIDM[147.04]PFSETGIQPDIIINPHAFPSR.M	4YM7_2_RPA2	1	RPA2	KWPTIDMPFSETGIQPDIIINPHAFPSR	930	//13	6//71	0.2915	0.363636	R.TPQIGDK[3488.78]FSSR.H	4YM7_2_RPA2	1	RPA2	TPQIGDKFSSR	916	126.127	26427	127.13	42842.8	28310.8	43537.1	1.53783	0.650268	-0.620894
				-142	28.4697	JL033021_040221_RPA2HFH_Q2_1to1_100B.20226.20226.6	P	8.39425	0.268534	7.26e-06	//16	25//245	8.31075	1.17857	R.K[1500.79]WPTIDM[147.04]PFSETGIQPDIIINPHAFPSR.M	4YM7_2_RPA2	1	RPA2	KWPTIDMPFSETGIQPDIIINPHAFPSR	930	//13	2//71	0.0835	0.0909091	R.TPQIGDK[3488.78]FSSR.H	4YM7_2_RPA2	1	RPA2	TPQIGDKFSSR	916	126.126	27269	127.13	23838.8	29378.5	23097.2	0.786193	1.27195	0.347044
				-141	26.576	JL033021_040221_RPA2HFH_Q2_1to1_1ug.17952.17952.6	P	8.3815	0.233566	0.0521	1//16	24//243	8.127	1.10714	R.K[1656.89]WPTIDM[147.04]PFSETGIQPDIIINPHAFPSR.M	4YM7_2_RPA2	1	RPA2	KWPTIDMPFSETGIQPDIIINPHAFPSR	930	1//14	4//83	0.2545	0.166667	R.RTPQIGDK[3488.78]FSSR.H	4YM7_2_RPA2	1	RPA2	RTPQIGDKFSSR	916	126.127	45641.4	127.13	39055.4	49179.1	37753.7	0.767679	1.30263	0.381425
				-141	24.1096	JL033021_040221_RPA2HFH_Q2_2to1_1ug.17993.17993.6	P	7.57225	0.21179	0.0136	1//16	25//243	7.2825	0.964286	R.K[1656.89]WPTIDM[147.04]PFSETGIQPDIIINPHAFPSR.M	4YM7_2_RPA2	1	RPA2	KWPTIDMPFSETGIQPDIIINPHAFPSR	930	1//14	4//83	0.28975	0.166667	R.RTPQIGDK[3488.78]FSSR.H	4YM7_2_RPA2	1	RPA2	RTPQIGDKFSSR	916	126.127	62996.6	127.131	30646.8	68068.6	27185.2	0.399379	2.50389	1.32417
				-145	19.3079	JL033021_040221_RPA2HFH_Q2_1to2_100B.19891.19891.5	P	6.912	0.203019	0.549	//16	24//245	6.81825	0.857143	R.K[1500.79]WPTIDM[147.04]PFSETGIQPDIIINPHAFPSR.M	4YM7_2_RPA2	1	RPA2	KWPTIDMPFSETGIQPDIIINPHAFPSR	930	//13	2//71	0.09375	0.0909091	R.TPQIGDK[3488.78]FSSR.H	4YM7_2_RPA2	1	RPA2	TPQIGDKFSSR	916	126.127	22598.7	127.13	36506.2	24210.7	37090.6	1.532	0.652744	-0.615412
				-142	38.1286	JL033021_040221_RPA2HFH_Q2_1to10_100B.19979.19979.5	P	5.80425	0.154815	0.381	//16	26//245	5.4135	0.803571	R.K[1500.79]WPTIDM[147.04]PFSETGIQPDIIINPHAFPSR.M	4YM7_2_RPA2	1	RPA2	KWPTIDMPFSETGIQPDIIINPHAFPSR	930	//13	4//71	0.39075	0.272727	R.TPQIGDK[3488.78]FSSR.H	4YM7_2_RPA2	1	RPA2	TPQIGDKFSSR	916	126.127	8831.44	127.13	57433.2	9110.29	60751.5	6.66845	0.14996	-2.73735
				-143	17.0234	JL033021_040221_RPA2HFH_Q2_5to1_100B.20065.20065.5	P	5.242	0.16078	0.522	//16	20//245	5.106	0.767857	R.K[1500.79]WPTIDM[147.04]PFSETGIQPDIIINPHAFPSR.M	4YM7_2_RPA2	1	RPA2	KWPTIDMPFSETGIQPDIIINPHAFPSR	930	//13	2//71	0.136	0.0909091	R.TPQIGDK[3488.78]FSSR.H	4YM7_2_RPA2	1	RPA2	TPQIGDKFSSR	916	126.127	40603.4	127.13	9432.56	43956.4	6462.68	0.147025	6.80158	2.76587
	12	RPA2:1043---RPA2:443	0.05925
				-141	41.4595	JL033021_040221_RPA2HFH_Q2_10to1_100B.21184.21184.3	P	0.05925	0.00263791	0.624	//12	//42	0	0	R.HMVNDK[1220.63]FQVR.S	4YM7_2_RPA2	1	RPA2	HMVNDKFQVR	1043	//7	2//26	0.05925	0.142857	K.DK[1538.8]RYMSR.V	4YM7_2_RPA2	1	RPA2	DKRYMSR	443	126.127	9925.79	127.13	2298.51	10745.5	1571.97	0.146291	6.83568	2.77309
	13	RPA2:1043---RPA2:916	0.9495
				-142	44.6307	JL033021_040221_RPA2HFH_Q2_5to1_1ug.11668.11668.5	P	0.9495	0.0321826	0.356	//13	5//71	0.58875	0.409091	R.TPQIGDK[1554.8]FSSR.H	4YM7_2_RPA2	1	RPA2	TPQIGDKFSSR	916	1//12	4//67	0.36075	0.2	R.HM[147.04]VNDK[1500.79]FQVR.S	4YM7_2_RPA2	1	RPA2	HMVNDKFQVR	1043	126.126	71666.1	127.13	18704.7	77567.5	13609.9	0.175459	5.69933	2.51079
	14	RPA2:1043---RPA2:805	1.57
				-142	41.0326	JL033021_040221_RPA2HFH_Q2_10to1_100B.10829.10829.4	P	1.57	0.0574523	0.224	//14	5//65	1.1985	0.5	R.GFGYGTM[147.04]YK[1554.8]TEK.V	4YM7_2_RPA2	1	RPA2	GFGYGTMYKTEK	805	//12	3//52	0.3715	0.25	R.HM[147.04]VNDK[1662.8]FQVR.S	4YM7_2_RPA2	1	RPA2	HMVNDKFQVR	1043	126.127	57308.1	127.13	8688.85	62078.3	4166.1	0.0671105	14.9008	3.89732
				-141	38.7579	JL033021_040221_RPA2HFH_Q2_5to1_1ug.10758.10758.5	P	0.876	0.0358436	0.168	//14	5//83	0.697	0.5	R.GFGYGTM[147.04]YK[1554.8]TEK.V	4YM7_2_RPA2	1	RPA2	GFGYGTMYKTEK	805	//12	3//67	0.179	0.25	R.HM[147.04]VNDK[1662.8]FQVR.S	4YM7_2_RPA2	1	RPA2	HMVNDKFQVR	1043	126.127	145230	127.13	40264.9	157170	30109.4	0.191573	5.21995	2.38404
				-141	36.2719	JL033021_040221_RPA2HFH_Q2_1to10_1ug.10910.10910.5	P	0.8025	0.0309911	0.138	//14	4//83	0.4805	0.25	R.GFGYGTM[147.04]YK[1554.8]TEK.V	4YM7_2_RPA2	1	RPA2	GFGYGTMYKTEK	805	//12	5//67	0.322	0.5	R.HM[147.04]VNDK[1662.8]FQVR.S	4YM7_2_RPA2	1	RPA2	HMVNDKFQVR	1043	126.127	14992.7	127.13	107975	15380.9	114359	7.43511	0.134497	-2.89435
				-142	35.3254	JL033021_040221_RPA2HFH_Q2_10to1_100B.10962.10962.4	P	0.19975	0.0084888	0.259	//14	3//65	0.09175	0.208333	R.GFGYGTM[147.04]YK[1554.8]TEK.V	4YM7_2_RPA2	1	RPA2	GFGYGTMYKTEK	805	//12	2//52	0.108	0.1	R.HM[147.04]VNDK[1662.8]FQVR.S	4YM7_2_RPA2	1	RPA2	HMVNDKFQVR	1043	126.127	48581	127.13	10004.1	52603.3	6358.93	0.120885	8.27235	3.0483
	15	RPA2:1043---RPA2:924	0.42025
				-141	36.6371	JL033021_040221_RPA2HFH_Q2_10to1_100B.08399.08399.5	P	0.42025	0.0237269	0.382	//12	2//70	0.0785	0.1	R.HM[147.04]VNDK[1293.66]FQVR.S	4YM7_2_RPA2	1	RPA2	HMVNDKFQVR	1043	//11	4//54	0.34175	0.5	R.HGQK[1554.8]GVC[160.03]SR.K	4YM7_2_RPA2	1	RPA2	HGQKGVCSR	924	126.127	83367.1	127.13	14316.2	90292.6	7856.86	0.0870155	11.4922	3.52258
				-143	43.526	JL033021_040221_RPA2HFH_Q2_10to1_100B.08758.08758.5	P	0.27025	0.0139632	0.439	//12	3//70	0.08675	0.15	R.HM[147.04]VNDK[1293.66]FQVR.S	4YM7_2_RPA2	1	RPA2	HMVNDKFQVR	1043	//11	3//54	0.1835	0.166667	R.HGQK[1554.8]GVC[160.03]SR.K	4YM7_2_RPA2	1	RPA2	HGQKGVCSR	924	126.127	87190	127.13	14111.7	94440.1	7294.6	0.0772405	12.9466	3.6945
	16	RPA2:1043---RPA2:1061	3.3815
				-141	34.6154	JL033021_040221_RPA2HFH_Q2_1to1_50B.10961.10961.6	P	3.3815	0.128905	0.00315	//18	9//121	1.02875	0.59375	R.STGPVNSLTM[147.04]QPVK[1554.8]GR.K	4YM7_2_RPA2	1	RPA2	STGPVNSLTMQPVKGR	1061	//12	9//67	2.35275	1.1	R.HM[147.04]VNDK[1953.04]FQVR.S	4YM7_2_RPA2	1	RPA2	HMVNDKFQVR	1043	126.127	69629.5	127.13	72683.6	74919.8	71635.5	0.956162	1.04585	0.0646723
				-141	33.3216	JL033021_040221_RPA2HFH_Q2_1to1_50B.10972.10972.6	P	2.9685	0.107757	0.000363	//18	9//121	0.8045	0.40625	R.STGPVNSLTM[147.04]QPVK[1554.8]GR.K	4YM7_2_RPA2	1	RPA2	STGPVNSLTMQPVKGR	1061	//12	8//67	2.164	0.9	R.HM[147.04]VNDK[1953.04]FQVR.S	4YM7_2_RPA2	1	RPA2	HMVNDKFQVR	1043	126.127	80515.9	127.13	79108	86673.6	77542.5	0.89465	1.11776	0.160605
				-141	34.6393	JL033021_040221_RPA2HFH_Q2_5to1_50B.10822.10822.5	P	2.556	0.0557762	1.43e-06	//18	10//121	1.7195	0.78125	R.STGPVNSLTM[147.04]QPVK[1554.8]GR.K	4YM7_2_RPA2	1	RPA2	STGPVNSLTMQPVKGR	1061	//12	8//67	0.8365	0.9	R.HM[147.04]VNDK[1953.04]FQVR.S	4YM7_2_RPA2	1	RPA2	HMVNDKFQVR	1043	126.127	300040	127.13	78732.6	324743	57433	0.176856	5.6543	2.49935
				-141	34.7373	JL033021_040221_RPA2HFH_Q2_1to5_50B.10613.10613.5	P	2.26225	0.05317	0.00338	//18	10//121	1.725	0.78125	R.STGPVNSLTM[147.04]QPVK[1554.8]GR.K	4YM7_2_RPA2	1	RPA2	STGPVNSLTMQPVKGR	1061	//12	6//67	0.53725	0.55	R.HM[147.04]VNDK[1953.04]FQVR.S	4YM7_2_RPA2	1	RPA2	HMVNDKFQVR	1043	126.127	83869.2	127.13	309980	88432.4	324640	3.67105	0.272402	-1.87619
				-141	34.0512	JL033021_040221_RPA2HFH_Q2_1to1_50B.10913.10913.5	P	2.14625	0.051425	7.18e-10	//18	9//121	1.49925	0.5625	R.STGPVNSLTM[147.04]QPVK[1554.8]GR.K	4YM7_2_RPA2	1	RPA2	STGPVNSLTMQPVKGR	1061	//12	6//67	0.647	0.5	R.HM[147.04]VNDK[1953.04]FQVR.S	4YM7_2_RPA2	1	RPA2	HMVNDKFQVR	1043	126.127	94921.5	127.13	90911.5	102200	88897.7	0.86984	1.14964	0.201177
				-141	36.5058	JL033021_040221_RPA2HFH_Q2_1to1_50B.10921.10921.4	P	2.12975	0.0724787	0.075	//18	10//94	1.9175	0.875	R.STGPVNSLTM[147.04]QPVK[1554.8]GR.K	4YM7_2_RPA2	1	RPA2	STGPVNSLTMQPVKGR	1061	//12	4//52	0.21225	0.2	R.HM[147.04]VNDK[1953.04]FQVR.S	4YM7_2_RPA2	1	RPA2	HMVNDKFQVR	1043	126.127	78529.6	127.13	80869.5	84505.2	79608.4	0.942053	1.06151	0.0861196
				-141	38.4618	JL033021_040221_RPA2HFH_Q2_1to10_50B.10674.10674.5	P	1.96025	0.0500255	0.000811	//18	10//121	1.2965	0.78125	R.STGPVNSLTM[147.04]QPVK[1554.8]GR.K	4YM7_2_RPA2	1	RPA2	STGPVNSLTMQPVKGR	1061	//12	7//67	0.66375	0.7	R.HM[147.04]VNDK[1953.04]FQVR.S	4YM7_2_RPA2	1	RPA2	HMVNDKFQVR	1043	126.127	45588.8	127.13	266768	47269.9	281771	5.9609	0.16776	-2.57553
				-141	33.5611	JL033021_040221_RPA2HFH_Q2_10to1_50B.10871.10871.5	P	1.85975	0.0430423	7.32e-08	//18	10//121	1.21525	0.6875	R.STGPVNSLTM[147.04]QPVK[1554.8]GR.K	4YM7_2_RPA2	1	RPA2	STGPVNSLTMQPVKGR	1061	//12	8//67	0.6445	0.75	R.HM[147.04]VNDK[1953.04]FQVR.S	4YM7_2_RPA2	1	RPA2	HMVNDKFQVR	1043	126.127	208656	127.13	39964.1	225956	24093.1	0.106627	9.37849	3.22936
				-141	33.5611	JL033021_040221_RPA2HFH_Q2_10to1_1ug.10819.10819.5	P	1.7565	0.0421223	0.0533	//18	8//121	1.1175	0.625	R.STGPVNSLTM[147.04]QPVK[1554.8]GR.K	4YM7_2_RPA2	1	RPA2	STGPVNSLTMQPVKGR	1061	//12	7//67	0.639	0.7	R.HM[147.04]VNDK[1953.04]FQVR.S	4YM7_2_RPA2	1	RPA2	HMVNDKFQVR	1043	126.127	218746	127.13	40698.7	236892	23974.5	0.101204	9.88101	3.30466
				-141	34.1492	JL033021_040221_RPA2HFH_Q2_1to2_1ug.10914.10914.5	P	1.6285	0.042268	4.51e-05	//18	10//121	0.9555	0.5	R.STGPVNSLTM[147.04]QPVK[1554.8]GR.K	4YM7_2_RPA2	1	RPA2	STGPVNSLTMQPVKGR	1061	//12	6//67	0.673	0.55	R.HM[147.04]VNDK[1953.04]FQVR.S	4YM7_2_RPA2	1	RPA2	HMVNDKFQVR	1043	126.127	61265.7	127.13	101225	65617.4	102971	1.56926	0.637242	-0.650086
				-141	34.0512	JL033021_040221_RPA2HFH_Q2_2to1_1ug.10856.10856.5	P	1.61875	0.040908	0.00161	//18	10//121	1.1005	0.59375	R.STGPVNSLTM[147.04]QPVK[1554.8]GR.K	4YM7_2_RPA2	1	RPA2	STGPVNSLTMQPVKGR	1061	//12	6//67	0.51825	0.55	R.HM[147.04]VNDK[1953.04]FQVR.S	4YM7_2_RPA2	1	RPA2	HMVNDKFQVR	1043	126.127	140955	127.13	68304.1	152306	60539.4	0.397485	2.51582	1.33103
				-141	35.0944	JL033021_040221_RPA2HFH_Q2_10to1_50B.10872.10872.4	P	1.60575	0.0452624	0.121	//18	9//94	1.2625	0.53125	R.STGPVNSLTM[147.04]QPVK[1554.8]GR.K	4YM7_2_RPA2	1	RPA2	STGPVNSLTMQPVKGR	1061	//12	6//52	0.34325	0.4	R.HM[147.04]VNDK[1953.04]FQVR.S	4YM7_2_RPA2	1	RPA2	HMVNDKFQVR	1043	126.127	139575	127.13	24779.8	151163	14023.5	0.0927706	10.7793	3.43019
				-141	30.6207	JL033021_040221_RPA2HFH_Q2_1to5_50B.10587.10587.5	P	1.26725	0.0352499	0.146	//18	8//121	0.92225	0.4375	R.STGPVNSLTM[147.04]QPVK[1554.8]GR.K	4YM7_2_RPA2	1	RPA2	STGPVNSLTMQPVKGR	1061	//12	5//67	0.345	0.35	R.HM[147.04]VNDK[1953.04]FQVR.S	4YM7_2_RPA2	1	RPA2	HMVNDKFQVR	1043	126.127	58691.8	127.13	219647	61863	230100	3.71952	0.268852	-1.89512
				-141	33.4631	JL033021_040221_RPA2HFH_Q2_1to2_1ug.10901.10901.5	P	1.133	0.0331514	0.0527	//18	8//121	0.84475	0.375	R.STGPVNSLTM[147.04]QPVK[1554.8]GR.K	4YM7_2_RPA2	1	RPA2	STGPVNSLTMQPVKGR	1061	//12	4//67	0.28825	0.2	R.HM[147.04]VNDK[1953.04]FQVR.S	4YM7_2_RPA2	1	RPA2	HMVNDKFQVR	1043	126.127	54325.9	127.13	87061.8	58206.6	88416.8	1.51902	0.658321	-0.603138
				-141	33.8552	JL033021_040221_RPA2HFH_Q2_1to10_1ug.10921.10921.5	P	0.984	0.0262369	0.000764	//18	8//121	0.73025	0.4375	R.STGPVNSLTM[147.04]QPVK[1554.8]GR.K	4YM7_2_RPA2	1	RPA2	STGPVNSLTMQPVKGR	1061	//12	3//67	0.25375	0.15	R.HM[147.04]VNDK[1953.04]FQVR.S	4YM7_2_RPA2	1	RPA2	HMVNDKFQVR	1043	126.127	23667.3	127.13	165387	24321.3	175101	7.19947	0.138899	-2.84789
				-141	36.1095	JL033021_040221_RPA2HFH_Q2_1to1_1ug.10825.10825.5	P	0.9825	0.0280987	0.511	//18	8//121	0.74275	0.4375	R.STGPVNSLTM[147.04]QPVK[1554.8]GR.K	4YM7_2_RPA2	1	RPA2	STGPVNSLTMQPVKGR	1061	//12	3//67	0.23975	0.15	R.HM[147.04]VNDK[1953.04]FQVR.S	4YM7_2_RPA2	1	RPA2	HMVNDKFQVR	1043	126.127	68013.6	127.13	57885.3	73287.8	55923	0.76306	1.31051	0.390131
				-141	33.9532	JL033021_040221_RPA2HFH_Q2_1to5_1ug.10876.10876.5	P	0.96275	0.0268572	0.000696	//18	7//121	0.7035	0.34375	R.STGPVNSLTM[147.04]QPVK[1554.8]GR.K	4YM7_2_RPA2	1	RPA2	STGPVNSLTMQPVKGR	1061	//12	3//67	0.25925	0.15	R.HM[147.04]VNDK[1953.04]FQVR.S	4YM7_2_RPA2	1	RPA2	HMVNDKFQVR	1043	126.126	30194.4	127.129	102711	31909.5	107352	3.36427	0.297242	-1.75029
				-141	34.6393	JL033021_040221_RPA2HFH_Q2_10to1_100B.10989.10989.5	P	0.55125	0.0180038	0.424	//18	5//121	0.48725	0.21875	R.STGPVNSLTM[147.04]QPVK[1554.8]GR.K	4YM7_2_RPA2	1	RPA2	STGPVNSLTMQPVKGR	1061	//12	2//67	0.064	0.1	R.HM[147.04]VNDK[1953.04]FQVR.S	4YM7_2_RPA2	1	RPA2	HMVNDKFQVR	1043	126.127	61211.8	127.13	10367.9	66298	5614.94	0.0846926	11.8074	3.56162
	17	RPA2:1043---RPA2:120	0.988
				-142	42.0175	JL033021_040221_RPA2HFH_Q2_10to1_100B.08540.08540.4	P	0.988	0.0417283	0.298	//12	2//56	0.099	0.1	R.HM[147.04]VNDK[1230.66]FQVR.S	4YM7_2_RPA2	1	RPA2	HMVNDKFQVR	1043	//9	6//42	0.889	0.625	R.K[1554.8]VYPSESR.Q	4YM7_2_RPA2	1	RPA2	KVYPSESR	120	126.127	65858.4	127.13	10047.8	71339.7	4854.72	0.0680507	14.6949	3.87725
				-141	44.4679	JL033021_040221_RPA2HFH_Q2_10to1_100B.08568.08568.4	P	0.75525	0.0378098	0.413	//12	2//56	0.06325	0.1	R.HM[147.04]VNDK[1230.66]FQVR.S	4YM7_2_RPA2	1	RPA2	HMVNDKFQVR	1043	//9	6//42	0.692	0.625	R.K[1554.8]VYPSESR.Q	4YM7_2_RPA2	1	RPA2	KVYPSESR	120	126.127	65101.8	127.13	11343.8	70508.6	6311.39	0.0895124	11.1716	3.48177
	18	RPA2:1043---RPA2:740	3.335
				-141	43.3695	JL033021_040221_RPA2HFH_Q2_2to1_1ug.09735.09735.5	P	3.335	0.108436	0.00127	//12	9//72	1.8055	1.2	R.HM[147.04]VNDK[1160.62]FQVR.S	4YM7_2_RPA2	1	RPA2	HMVNDKFQVR	1043	//9	5//40	1.5295	0.857143	R.SDNK[1554.8]LYR.L	4YM7_2_RPA2	1	RPA2	SDNKLYR	740	126.127	154847	127.13	78019.3	167293	69703	0.416653	2.40008	1.26308
				-141	42.4491	JL033021_040221_RPA2HFH_Q2_2to1_100B.09558.09558.5	P	3.2	0.0914508	0.186	//12	9//72	1.66	1.2	R.HM[147.04]VNDK[1160.62]FQVR.S	4YM7_2_RPA2	1	RPA2	HMVNDKFQVR	1043	//9	5//40	1.54	0.857143	R.SDNK[1554.8]LYR.L	4YM7_2_RPA2	1	RPA2	SDNKLYR	740	126.127	353004	127.13	195385	381233	177680	0.466068	2.14561	1.10139
				-141	46.4591	JL033021_040221_RPA2HFH_Q2_1to2_1ug.09950.09950.5	P	2.7215	0.100714	0.000209	//12	9//72	1.324	1.2	R.HM[147.04]VNDK[1160.62]FQVR.S	4YM7_2_RPA2	1	RPA2	HMVNDKFQVR	1043	//9	4//40	1.3975	0.642857	R.SDNK[1554.8]LYR.L	4YM7_2_RPA2	1	RPA2	SDNKLYR	740	126.127	67094.3	127.13	116018	71818.1	118300	1.64721	0.607086	-0.720027
				-141	42.1862	JL033021_040221_RPA2HFH_Q2_5to1_100B.09648.09648.5	P	2.66625	0.0864403	0.0139	//12	9//72	1.14025	1.1	R.HM[147.04]VNDK[1160.62]FQVR.S	4YM7_2_RPA2	1	RPA2	HMVNDKFQVR	1043	//9	5//40	1.526	0.857143	R.SDNK[1554.8]LYR.L	4YM7_2_RPA2	1	RPA2	SDNKLYR	740	126.127	381439	127.13	101964	412829	75020.2	0.181722	5.5029	2.46019
				-141	43.3695	JL033021_040221_RPA2HFH_Q2_1to1_1ug.09801.09801.5	P	2.63975	0.0875946	0.00262	//12	9//72	1.25525	1.05	R.HM[147.04]VNDK[1160.62]FQVR.S	4YM7_2_RPA2	1	RPA2	HMVNDKFQVR	1043	//9	4//40	1.3845	0.642857	R.SDNK[1554.8]LYR.L	4YM7_2_RPA2	1	RPA2	SDNKLYR	740	126.127	107167	127.13	115588	115279	114242	0.991001	1.00908	0.013041
				-141	44.1583	JL033021_040221_RPA2HFH_Q2_5to1_1ug.09743.09743.5	NP	2.58075	0.10277	9.05e-05	//12	7//72	1.22375	0.85	R.HM[147.04]VNDK[1160.62]FQVR.S	4YM7_2_RPA2	1	RPA2	HMVNDKFQVR	1043	//9	4//40	1.357	0.642857	R.SDNK[1554.8]LYR.L	4YM7_2_RPA2	1	RPA2	SDNKLYR	740	126.127	174486	127.13	43483.2	188871	30931.7	0.163772	6.10605	2.61024
				-141	45.4394	JL033021_040221_RPA2HFH_Q2_5to1_100B.09727.09727.4	P	2.506	0.093635	0.0265	//12	9//57	1.72	1.1	R.HM[147.04]VNDK[1160.62]FQVR.S	4YM7_2_RPA2	1	RPA2	HMVNDKFQVR	1043	//9	5//33	0.786	0.714286	R.SDNK[1554.8]LYR.L	4YM7_2_RPA2	1	RPA2	SDNKLYR	740	126.127	260132	127.13	67872.2	281553	49377.8	0.175376	5.70203	2.51147
				-141	47.0508	JL033021_040221_RPA2HFH_Q2_1to10_1ug.09979.09979.5	P	2.21975	0.0829038	0.00847	//12	5//72	0.73425	0.65	R.HM[147.04]VNDK[1160.62]FQVR.S	4YM7_2_RPA2	1	RPA2	HMVNDKFQVR	1043	//9	5//40	1.4855	0.857143	R.SDNK[1554.8]LYR.L	4YM7_2_RPA2	1	RPA2	SDNKLYR	740	126.127	19716.6	127.13	154220	20127.7	163489	8.12259	0.123113	-3.02194
				-141	44.5979	JL033021_040221_RPA2HFH_Q2_1to10_100B.10238.10238.4	P	2.1445	0.0752694	0.00973	//12	7//57	1.416	1	R.HM[147.04]VNDK[1160.62]FQVR.S	4YM7_2_RPA2	1	RPA2	HMVNDKFQVR	1043	//9	5//33	0.7285	0.857143	R.SDNK[1554.8]LYR.L	4YM7_2_RPA2	1	RPA2	SDNKLYR	740	126.127	32939.6	127.13	257042	33631.3	272485	8.10212	0.123425	-3.0183
				-141	41.3973	JL033021_040221_RPA2HFH_Q2_1to1_100B.10140.10140.5	P	2.02325	0.0833745	0.00036	//12	6//72	0.61625	0.65	R.HM[147.04]VNDK[1160.62]FQVR.S	4YM7_2_RPA2	1	RPA2	HMVNDKFQVR	1043	//9	4//40	1.407	0.642857	R.SDNK[1554.8]LYR.L	4YM7_2_RPA2	1	RPA2	SDNKLYR	740	126.127	91629.3	127.13	96836.2	98581.6	95542.1	0.969167	1.03181	0.0451821
				-141	43.5667	JL033021_040221_RPA2HFH_Q2_10to1_100B.09507.09507.5	P	1.99325	0.0703	0.246	//12	6//72	0.63375	0.65	R.HM[147.04]VNDK[1160.62]FQVR.S	4YM7_2_RPA2	1	RPA2	HMVNDKFQVR	1043	//9	4//40	1.3595	0.642857	R.SDNK[1554.8]LYR.L	4YM7_2_RPA2	1	RPA2	SDNKLYR	740	126.127	226956	127.13	43458.4	245773	26194.8	0.106581	9.38251	3.22997
				-141	44.2898	JL033021_040221_RPA2HFH_Q2_1to10_100B.10412.10412.5	P	1.8685	0.0699891	0.0261	//12	5//72	0.50725	0.5	R.HM[147.04]VNDK[1160.62]FQVR.S	4YM7_2_RPA2	1	RPA2	HMVNDKFQVR	1043	//9	4//40	1.36125	0.642857	R.SDNK[1554.8]LYR.L	4YM7_2_RPA2	1	RPA2	SDNKLYR	740	126.127	34943.3	127.13	257611	35799.6	272915	7.62339	0.131175	-2.93043
				-141	46.4591	JL033021_040221_RPA2HFH_Q2_5to1_100B.09870.09870.5	P	1.7585	0.0852255	0.347	//12	5//72	0.4705	0.6	R.HM[147.04]VNDK[1160.62]FQVR.S	4YM7_2_RPA2	1	RPA2	HMVNDKFQVR	1043	//9	4//40	1.288	0.642857	R.SDNK[1554.8]LYR.L	4YM7_2_RPA2	1	RPA2	SDNKLYR	740	126.127	112137	127.13	32284.7	121347	24528.9	0.202139	4.94709	2.30658
				-141	44.072	JL033021_040221_RPA2HFH_Q2_1to2_100B.09881.09881.4	P	1.614	0.0576202	0.00316	//12	7//57	1.2335	1	R.HM[147.04]VNDK[1160.62]FQVR.S	4YM7_2_RPA2	1	RPA2	HMVNDKFQVR	1043	//9	5//33	0.3805	0.714286	R.SDNK[1554.8]LYR.L	4YM7_2_RPA2	1	RPA2	SDNKLYR	740	126.127	110974	127.13	213993	118608	219348	1.84936	0.540728	-0.887026
				-141	42.7047	JL033021_040221_RPA2HFH_Q2_1to2_100B.09806.09806.4	P	1.102	0.0378129	0.0244	//12	5//57	0.5515	0.6	R.HM[147.04]VNDK[1160.62]FQVR.S	4YM7_2_RPA2	1	RPA2	HMVNDKFQVR	1043	//9	3//33	0.5505	0.571429	R.SDNK[1554.8]LYR.L	4YM7_2_RPA2	1	RPA2	SDNKLYR	740	126.127	79979.8	127.13	150321	85513	153902	1.79975	0.555634	-0.847793
				-141	42.3891	JL033021_040221_RPA2HFH_Q2_2to1_1ug.09703.09703.4	P	1.0345	0.0332236	0.343	//12	5//57	0.5045	0.6	R.HM[147.04]VNDK[1160.62]FQVR.S	4YM7_2_RPA2	1	RPA2	HMVNDKFQVR	1043	//9	5//33	0.53	0.714286	R.SDNK[1554.8]LYR.L	4YM7_2_RPA2	1	RPA2	SDNKLYR	740	126.127	150698	127.13	76071.5	162809	67988.2	0.417595	2.39467	1.25982
				-141	45.0186	JL033021_040221_RPA2HFH_Q2_1to10_100B.10405.10405.4	P	1.0325	0.03769	0.00391	//12	3//57	0.29275	0.15	R.HM[147.04]VNDK[1160.62]FQVR.S	4YM7_2_RPA2	1	RPA2	HMVNDKFQVR	1043	//9	5//33	0.73975	0.714286	R.SDNK[1554.8]LYR.L	4YM7_2_RPA2	1	RPA2	SDNKLYR	740	126.127	20398.5	127.13	158830	20829.7	168368	8.08307	0.123715	-3.0149
				-141	45.8601	JL033021_040221_RPA2HFH_Q2_1to5_100B.10796.10796.4	P	0.93475	0.0370455	0.000806	//12	7//57	0.59375	0.7	R.HM[147.04]VNDK[1160.62]FQVR.S	4YM7_2_RPA2	1	RPA2	HMVNDKFQVR	1043	//9	4//33	0.341	0.642857	R.SDNK[1554.8]LYR.L	4YM7_2_RPA2	1	RPA2	SDNKLYR	740	126.127	36861.6	127.13	162115	38656.8	170410	4.40829	0.226845	-2.14022
				841	-162.852	JL033021_040221_RPA2HFH_Q2_1to5_100B.11189.11189.3	P	0.50925	0.0255455	0.00505	//12	1//42	0.01825	0.05	R.HM[147.04]VNDK[1160.62]FQVR.S	4YM7_2_RPA2	1	RPA2	HMVNDKFQVR	1043	//9	3//26	0.491	0.357143	R.SDNK[1554.8]LYR.L	4YM7_2_RPA2	1	RPA2	SDNKLYR	740	126.127	20518.2	127.13	69675.8	21684.7	72821.3	3.35819	0.29778	-1.74768
				-141	44.7031	JL033021_040221_RPA2HFH_Q2_1to1_100B.10303.10303.4	P	0.24775	0.0108429	0.609	//12	3//57	0.18075	0.15	R.HM[147.04]VNDK[1160.62]FQVR.S	4YM7_2_RPA2	1	RPA2	HMVNDKFQVR	1043	//9	1//33	0.067	0.0714286	R.SDNK[1554.8]LYR.L	4YM7_2_RPA2	1	RPA2	SDNKLYR	740	126.127	69401.1	127.13	75965.2	74645.5	75172.6	1.00706	0.992988	-0.0101516
				-141	42.5995	JL033021_040221_RPA2HFH_Q2_10to1_100B.09669.09669.4	P	0.1935	0.00851748	0.587	//12	1//57	0.0515	0.05	R.HM[147.04]VNDK[1160.62]FQVR.S	4YM7_2_RPA2	1	RPA2	HMVNDKFQVR	1043	//9	3//33	0.142	0.214286	R.SDNK[1554.8]LYR.L	4YM7_2_RPA2	1	RPA2	SDNKLYR	740	126.127	92754.5	127.131	15796.2	100461	8600.05	0.0856058	11.6814	3.54615
	19	RPA2:2---RPA2:370	2.30875
				-141	29.4035	JL033021_040221_RPA2HFH_Q2_1to5_1ug.15478.15478.4	P	2.30875	0.0740506	0.096	//16	10//88	2.083	0.766667	K.DGSQDK[1445.87]FRM[147.04]LLFM[147.04]IR.K	4YM7_2_RPA2	1	RPA2	DGSQDKFRMLLFMIR	370	//12	3//57	0.22575	0.227273	M.S[2113.03]KVIKPPGQAR.T	4YM7_2_RPA2	1	RPA2	SKVIKPPGQAR	2	126.127	14225.3	127.13	47538.6	15040.2	49664.4	3.30211	0.302837	-1.72339
	20	RPA2:106---RPA2:120	11.9923
				-141	29.4441	JL033021_040221_RPA2HFH_Q2_1to2_50B.12387.12387.5	NP	11.9923	0.315598	1.08e-05	//11	32//191	9.73875	1.82	K.LSVSVEQVSIAK[1230.66]PM[147.04]SNDGVSSAVER.K	4YM7_2_RPA2	1	RPA2	LSVSVEQVSIAKPMSNDGVSSAVER	106	//9	9//47	2.2535	1.625	R.K[2870.47]VYPSESR.Q	4YM7_2_RPA2	1	RPA2	KVYPSESR	120	126.127	204506	127.13	352340	218914	359202	1.64083	0.609447	-0.714428
				-141	29.2794	JL033021_040221_RPA2HFH_Q2_10to1_1ug.12761.12761.5	NP	11.6278	0.312624	0.000107	//11	28//191	9.38275	1.7	K.LSVSVEQVSIAK[1230.66]PM[147.04]SNDGVSSAVER.K	4YM7_2_RPA2	1	RPA2	LSVSVEQVSIAKPMSNDGVSSAVER	106	//9	10//47	2.245	1.6875	R.K[2870.47]VYPSESR.Q	4YM7_2_RPA2	1	RPA2	KVYPSESR	120	126.127	246486	127.13	50586.6	266895	32079.9	0.120197	8.31971	3.05653
				-141	30.432	JL033021_040221_RPA2HFH_Q2_5to1_1ug.12803.12803.5	NP	11.5858	0.304632	1.62e-14	//11	33//191	9.31475	1.96	K.LSVSVEQVSIAK[1230.66]PM[147.04]SNDGVSSAVER.K	4YM7_2_RPA2	1	RPA2	LSVSVEQVSIAKPMSNDGVSSAVER	106	//9	9//47	2.271	1.625	R.K[2870.47]VYPSESR.Q	4YM7_2_RPA2	1	RPA2	KVYPSESR	120	126.127	366065	127.131	97276.5	396195	71377.1	0.180157	5.55073	2.47268
				-141	30.185	JL033021_040221_RPA2HFH_Q2_1to10_50B.12618.12618.5	NP	11.4552	0.295025	9e-07	//11	31//191	9.308	1.76	K.LSVSVEQVSIAK[1230.66]PM[147.04]SNDGVSSAVER.K	4YM7_2_RPA2	1	RPA2	LSVSVEQVSIAKPMSNDGVSSAVER	106	//9	10//47	2.14725	1.6875	R.K[2870.47]VYPSESR.Q	4YM7_2_RPA2	1	RPA2	KVYPSESR	120	126.127	50215	127.13	354017	51577.3	374850	7.26774	0.137594	-2.86151
				-141	31.2552	JL033021_040221_RPA2HFH_Q2_1to10_1ug.12848.12848.5	NP	11.4142	0.311291	1.95e-05	//11	30//191	9.2225	1.68	K.LSVSVEQVSIAK[1230.66]PM[147.04]SNDGVSSAVER.K	4YM7_2_RPA2	1	RPA2	LSVSVEQVSIAKPMSNDGVSSAVER	106	//9	9//47	2.19175	1.625	R.K[2870.47]VYPSESR.Q	4YM7_2_RPA2	1	RPA2	KVYPSESR	120	126.127	25737.5	127.13	177321	26469.3	187704	7.09139	0.141016	-2.82607
				-141	30.679	JL033021_040221_RPA2HFH_Q2_1to5_1ug.12819.12819.5	NP	11.3477	0.31586	2.03e-09	//11	29//191	9.2625	1.7	K.LSVSVEQVSIAK[1230.66]PM[147.04]SNDGVSSAVER.K	4YM7_2_RPA2	1	RPA2	LSVSVEQVSIAKPMSNDGVSSAVER	106	//9	9//47	2.08525	1.625	R.K[2870.47]VYPSESR.Q	4YM7_2_RPA2	1	RPA2	KVYPSESR	120	126.127	42517.7	127.13	166131	44757.9	174206	3.89218	0.256925	-1.96058
				-141	29.7734	JL033021_040221_RPA2HFH_Q2_2to1_50B.12194.12194.5	NP	11.3208	0.29306	1.37e-07	//11	29//191	9.31575	1.7	K.LSVSVEQVSIAK[1230.66]PM[147.04]SNDGVSSAVER.K	4YM7_2_RPA2	1	RPA2	LSVSVEQVSIAKPMSNDGVSSAVER	106	//9	9//47	2.005	1.4375	R.K[2870.47]VYPSESR.Q	4YM7_2_RPA2	1	RPA2	KVYPSESR	120	126.127	417779	127.13	218868	451288	197030	0.436594	2.29046	1.19564
				-141	30.0203	JL033021_040221_RPA2HFH_Q2_1to1_1ug.12729.12729.5	NP	10.8923	0.324488	1.36e-07	//11	24//191	8.85725	1.52	K.LSVSVEQVSIAK[1230.66]PM[147.04]SNDGVSSAVER.K	4YM7_2_RPA2	1	RPA2	LSVSVEQVSIAKPMSNDGVSSAVER	106	//9	9//47	2.035	1.625	R.K[2870.47]VYPSESR.Q	4YM7_2_RPA2	1	RPA2	KVYPSESR	120	126.127	65981.5	127.13	70176.1	70984.2	69276	0.975937	1.02466	0.0351408
				-141	27.7152	JL033021_040221_RPA2HFH_Q2_2to1_1ug.12773.12773.5	NP	10.8852	0.332791	5.31e-06	//11	28//191	8.82025	1.66	K.LSVSVEQVSIAK[1230.66]PM[147.04]SNDGVSSAVER.K	4YM7_2_RPA2	1	RPA2	LSVSVEQVSIAKPMSNDGVSSAVER	106	//9	9//47	2.065	1.625	R.K[2870.47]VYPSESR.Q	4YM7_2_RPA2	1	RPA2	KVYPSESR	120	126.127	87366	127.13	44532.6	94383.5	39877.2	0.422502	2.36685	1.24297
				-141	30.5143	JL033021_040221_RPA2HFH_Q2_1to10_1ug.12830.12830.5	NP	10.8462	0.333572	6.69e-06	//11	28//191	9.13325	1.7	K.LSVSVEQVSIAK[1230.66]PM[147.04]SNDGVSSAVER.K	4YM7_2_RPA2	1	RPA2	LSVSVEQVSIAKPMSNDGVSSAVER	106	//9	8//47	1.713	1.125	R.K[2870.47]VYPSESR.Q	4YM7_2_RPA2	1	RPA2	KVYPSESR	120	126.127	13532.6	127.13	93879.7	13912.2	99384.9	7.14374	0.139983	-2.83668
				0	3.3925	JL033021_040221_RPA2HFH_Q2_1to5_50B.12614.12614.4	N	10.6623	0.264523		1//9	7//36	1.5625	1.0625	R.K[2995.59]VYPSESR.Q	4YM7_2_RPA2	1	RPA2	KVYPSESR	120	//16	30//146	9.09975	1.72917	K.LSVSVEQVSIAK[1371.77]PMSNDGVSSAVER.K	4YM7_2_RPA2	1	RPA2	LSVSVEQVSIAKPMSNDGVSSAVER	106	126.127	20553.5	127.13	79320.4	21644.5	83153.1	3.84177	0.260297	-1.94177
				-141	30.679	JL033021_040221_RPA2HFH_Q2_2to1_D.12816.12816.5	NP	10.53	0.329593	7.27e-22	//11	25//191	8.672	1.54	K.LSVSVEQVSIAK[1230.66]PM[147.04]SNDGVSSAVER.K	4YM7_2_RPA2	1	RPA2	LSVSVEQVSIAKPMSNDGVSSAVER	106	//9	7//47	1.858	1.3125	R.K[2870.47]VYPSESR.Q	4YM7_2_RPA2	1	RPA2	KVYPSESR	120	126.127	43711.4	127.13	24508.1	47204.4	22338.3	0.473226	2.11315	1.0794
				0	3.3925	JL033021_040221_RPA2HFH_Q2_1to5_50B.12591.12591.4	N	10.2822	0.248082		1//9	7//36	1.592	1.0625	R.K[2995.59]VYPSESR.Q	4YM7_2_RPA2	1	RPA2	KVYPSESR	120	//16	31//146	8.69025	1.72917	K.LSVSVEQVSIAK[1371.77]PMSNDGVSSAVER.K	4YM7_2_RPA2	1	RPA2	LSVSVEQVSIAKPMSNDGVSSAVER	106	126.127	17657.8	127.13	68997.6	18588.1	72351.4	3.89235	0.256914	-1.96064
				-141	28.0445	JL033021_040221_RPA2HFH_Q2_1to5_50B.12638.12638.5	NP	9.8465	0.303011	1.39e-05	//11	23//191	8.351	1.5	K.LSVSVEQVSIAK[1230.66]PM[147.04]SNDGVSSAVER.K	4YM7_2_RPA2	1	RPA2	LSVSVEQVSIAKPMSNDGVSSAVER	106	//9	7//47	1.4955	1.0625	R.K[2870.47]VYPSESR.Q	4YM7_2_RPA2	1	RPA2	KVYPSESR	120	126.127	47857.5	127.131	174116	50483.8	182283	3.61072	0.276953	-1.85229
				-141	28.2091	JL033021_040221_RPA2HFH_Q2_1to2_1ug.12797.12797.5	NP	9.83225	0.276008	4.13e-08	//11	24//191	8.099	1.44	K.LSVSVEQVSIAK[1230.66]PM[147.04]SNDGVSSAVER.K	4YM7_2_RPA2	1	RPA2	LSVSVEQVSIAKPMSNDGVSSAVER	106	//9	8//47	1.73325	1.125	R.K[2870.47]VYPSESR.Q	4YM7_2_RPA2	1	RPA2	KVYPSESR	120	126.128	64390.4	127.131	109718	68937.1	111791	1.62163	0.616662	-0.697449
				-141	30.1027	JL033021_040221_RPA2HFH_Q2_1to10_1ug.12840.12840.5	NP	9.76325	0.285701	2.42e-06	//11	25//191	8.0895	1.46	K.LSVSVEQVSIAK[1230.66]PM[147.04]SNDGVSSAVER.K	4YM7_2_RPA2	1	RPA2	LSVSVEQVSIAKPMSNDGVSSAVER	106	//9	7//47	1.67375	1.0625	R.K[2870.47]VYPSESR.Q	4YM7_2_RPA2	1	RPA2	KVYPSESR	120	126.127	18656.6	127.131	131611	19162.1	139357	7.27255	0.137503	-2.86246
				-141	28.6208	JL033021_040221_RPA2HFH_Q2_2to1_100B.13221.13221.5	NP	9.366	0.271888	5.2e-05	//11	23//191	7.913	1.38	K.LSVSVEQVSIAK[1230.66]PM[147.04]SNDGVSSAVER.K	4YM7_2_RPA2	1	RPA2	LSVSVEQVSIAKPMSNDGVSSAVER	106	//9	6//47	1.453	0.8125	R.K[2870.47]VYPSESR.Q	4YM7_2_RPA2	1	RPA2	KVYPSESR	120	126.128	115036	127.131	60552.4	124260	54559.7	0.439076	2.27751	1.18746
				-141	29.1147	JL033021_040221_RPA2HFH_Q2_1to1_50B.12815.12815.5	NP	8.96175	0.278203	4.03e-15	//11	22//191	7.50125	1.36	K.LSVSVEQVSIAK[1230.66]PM[147.04]SNDGVSSAVER.K	4YM7_2_RPA2	1	RPA2	LSVSVEQVSIAKPMSNDGVSSAVER	106	//9	6//47	1.4605	0.8125	R.K[2870.47]VYPSESR.Q	4YM7_2_RPA2	1	RPA2	KVYPSESR	120	126.126	55324.7	127.13	58984.4	59518.2	58239.9	0.978522	1.02195	0.0313234
				-141	29.8557	JL033021_040221_RPA2HFH_Q2_5to1_50B.12772.12772.5	NP	8.75475	0.281209	5.73e-10	//11	24//191	7.67825	1.4	K.LSVSVEQVSIAK[1230.66]PM[147.04]SNDGVSSAVER.K	4YM7_2_RPA2	1	RPA2	LSVSVEQVSIAKPMSNDGVSSAVER	106	//9	6//47	1.0765	0.8125	R.K[2870.47]VYPSESR.Q	4YM7_2_RPA2	1	RPA2	KVYPSESR	120	126.127	68636.5	127.13	18418.7	74284.3	13575.5	0.18275	5.47196	2.45206
				-141	28.7854	JL033021_040221_RPA2HFH_Q2_1to2_D.12990.12990.5	NP	8.70725	0.283038	1.17e-20	//11	21//191	7.30675	1.16	K.LSVSVEQVSIAK[1230.66]PM[147.04]SNDGVSSAVER.K	4YM7_2_RPA2	1	RPA2	LSVSVEQVSIAKPMSNDGVSSAVER	106	//9	6//47	1.4005	0.8125	R.K[2870.47]VYPSESR.Q	4YM7_2_RPA2	1	RPA2	KVYPSESR	120	126.126	10900.7	127.129	18445.4	11671.4	18787.1	1.60967	0.621247	-0.686762
				-141	31.9962	JL033021_040221_RPA2HFH_Q2_1to10_50B.12786.12786.5	NP	8.688	0.274061	4.41e-06	//11	25//191	7.19375	1.42	K.LSVSVEQVSIAK[1230.66]PM[147.04]SNDGVSSAVER.K	4YM7_2_RPA2	1	RPA2	LSVSVEQVSIAKPMSNDGVSSAVER	106	//9	7//47	1.49425	1.0625	R.K[2870.47]VYPSESR.Q	4YM7_2_RPA2	1	RPA2	KVYPSESR	120	126.127	20697	127.13	129373	21393	136776	6.39347	0.15641	-2.6766
				-141	29.7734	JL033021_040221_RPA2HFH_Q2_10to1_50B.12898.12898.5	NP	8.62025	0.275685	4.37e-08	//11	27//191	7.3415	1.5	K.LSVSVEQVSIAK[1230.66]PM[147.04]SNDGVSSAVER.K	4YM7_2_RPA2	1	RPA2	LSVSVEQVSIAKPMSNDGVSSAVER	106	//9	6//47	1.27875	0.8125	R.K[2870.47]VYPSESR.Q	4YM7_2_RPA2	1	RPA2	KVYPSESR	120	126.127	46935.3	127.13	9547.74	50822.2	6017.67	0.118406	8.4455	3.07818
				-142	26.9084	JL033021_040221_RPA2HFH_Q2_2to1_D.13125.13125.5	NP	8.5665	0.259167	1.81e-14	//11	20//191	7.212	1.26	K.LSVSVEQVSIAK[1230.66]PM[147.04]SNDGVSSAVER.K	4YM7_2_RPA2	1	RPA2	LSVSVEQVSIAKPMSNDGVSSAVER	106	//9	6//47	1.3545	0.8125	R.K[2870.47]VYPSESR.Q	4YM7_2_RPA2	1	RPA2	KVYPSESR	120	126.127	22637.8	127.13	12861.2	24445.4	11749.5	0.480644	2.08054	1.05696
				-142	30.6131	JL033021_040221_RPA2HFH_Q2_1to10_1ug.13084.13084.5	P	8.26525	0.23363	0.000219	//11	23//191	6.90425	1.18	K.LSVSVEQVSIAK[1230.66]PM[147.04]SNDGVSSAVER.K	4YM7_2_RPA2	1	RPA2	LSVSVEQVSIAKPMSNDGVSSAVER	106	1//9	7//47	1.361	0.875	R.K[2870.47]VYPSESR.Q	4YM7_2_RPA2	1	RPA2	KVYPSESR	120	126.127	10008.5	127.13	77401	10224.3	82043	8.02428	0.124622	-3.00437
				-142	30.0368	JL033021_040221_RPA2HFH_Q2_1to2_1ug.13047.13047.5	P	8.262	0.244909	2.15e-05	//11	21//191	6.96875	1.1	K.LSVSVEQVSIAK[1230.66]PM[147.04]SNDGVSSAVER.K	4YM7_2_RPA2	1	RPA2	LSVSVEQVSIAKPMSNDGVSSAVER	106	//9	6//47	1.29325	0.8125	R.K[2870.47]VYPSESR.Q	4YM7_2_RPA2	1	RPA2	KVYPSESR	120	126.127	31864.9	127.13	53671.5	34120	54652.8	1.60178	0.624304	-0.679679
				-142	27.1554	JL033021_040221_RPA2HFH_Q2_1to10_50B.13007.13007.5	P	8.18875	0.234326	0.000106	//11	21//191	6.337	1.26	K.LSVSVEQVSIAK[1230.66]PM[147.04]SNDGVSSAVER.K	4YM7_2_RPA2	1	RPA2	LSVSVEQVSIAKPMSNDGVSSAVER	106	//9	7//47	1.85175	1.3125	R.K[2870.47]VYPSESR.Q	4YM7_2_RPA2	1	RPA2	KVYPSESR	120	126.127	22998.4	127.13	150122	23720	158804	6.69492	0.149367	-2.74307
				-141	33.2311	JL033021_040221_RPA2HFH_Q2_1to1_50B.12970.12970.5	NP	8.14775	0.252546	1.47e-14	//11	20//191	6.32475	1.2	K.LSVSVEQVSIAK[1230.66]PM[147.04]SNDGVSSAVER.K	4YM7_2_RPA2	1	RPA2	LSVSVEQVSIAKPMSNDGVSSAVER	106	//9	8//47	1.823	1.375	R.K[2870.47]VYPSESR.Q	4YM7_2_RPA2	1	RPA2	KVYPSESR	120	126.127	32649.5	127.13	33611	35134.1	33085.9	0.941705	1.0619	0.0866523
				-141	31.7492	JL033021_040221_RPA2HFH_Q2_1to5_D.13355.13355.5	NP	8.12575	0.257278	4.09e-13	//11	24//191	6.70475	1.3	K.LSVSVEQVSIAK[1230.66]PM[147.04]SNDGVSSAVER.K	4YM7_2_RPA2	1	RPA2	LSVSVEQVSIAKPMSNDGVSSAVER	106	//9	6//47	1.421	0.8125	R.K[2870.47]VYPSESR.Q	4YM7_2_RPA2	1	RPA2	KVYPSESR	120	126.126	5648.01	127.13	20922.1	5954.92	21912.7	3.67977	0.271756	-1.87961
				-141	26.7273	JL033021_040221_RPA2HFH_Q2_1to2_D.12807.12807.5	NP	8.11725	0.277836	3.51e-19	//11	22//191	6.82	1.36	K.LSVSVEQVSIAK[1230.66]PM[147.04]SNDGVSSAVER.K	4YM7_2_RPA2	1	RPA2	LSVSVEQVSIAKPMSNDGVSSAVER	106	//9	6//47	1.29725	0.8125	R.K[2870.47]VYPSESR.Q	4YM7_2_RPA2	1	RPA2	KVYPSESR	120	126.127	12934.9	127.131	24708.1	13826.6	25315.6	1.83094	0.546167	-0.872585
				-141	28.7031	JL033021_040221_RPA2HFH_Q2_1to2_1ug.13007.13007.5	NP	8.088	0.228181	1.03e-06	//11	23//191	7.1055	1.14	K.LSVSVEQVSIAK[1230.66]PM[147.04]SNDGVSSAVER.K	4YM7_2_RPA2	1	RPA2	LSVSVEQVSIAKPMSNDGVSSAVER	106	1//9	6//47	0.9825	0.625	R.K[2870.47]VYPSESR.Q	4YM7_2_RPA2	1	RPA2	KVYPSESR	120	126.127	29799.9	127.13	47474.2	31930.9	48197.2	1.50942	0.662506	-0.593995
				-141	33.8074	JL033021_040221_RPA2HFH_Q2_10to1_100B.13355.13355.5	NP	7.99325	0.258409	0.0554	//11	21//191	6.6515	1.22	K.LSVSVEQVSIAK[1230.66]PM[147.04]SNDGVSSAVER.K	4YM7_2_RPA2	1	RPA2	LSVSVEQVSIAKPMSNDGVSSAVER	106	//9	6//47	1.34175	0.8125	R.K[2870.47]VYPSESR.Q	4YM7_2_RPA2	1	RPA2	KVYPSESR	120	126.126	56632.3	127.13	10711.9	61328.9	6394.64	0.104268	9.59067	3.26163
				-141	33.6427	JL033021_040221_RPA2HFH_Q2_1to10_D.13637.13637.5	P	7.9115	0.277548	1.29e-10	//11	22//191	6.999	1.24	K.LSVSVEQVSIAK[1230.66]PM[147.04]SNDGVSSAVER.K	4YM7_2_RPA2	1	RPA2	LSVSVEQVSIAKPMSNDGVSSAVER	106	//9	5//47	0.9125	0.5625	R.K[2870.47]VYPSESR.Q	4YM7_2_RPA2	1	RPA2	KVYPSESR	120	126.127	2034.18	127.13	18453	2055.91	19591.3	9.52924	0.10494	-3.25236
				-141	29.0324	JL033021_040221_RPA2HFH_Q2_1to5_D.13287.13287.5	NP	7.88825	0.262072	2.11e-16	//11	20//191	6.6985	1.2	K.LSVSVEQVSIAK[1230.66]PM[147.04]SNDGVSSAVER.K	4YM7_2_RPA2	1	RPA2	LSVSVEQVSIAKPMSNDGVSSAVER	106	//9	6//47	1.18975	0.8125	R.K[2870.47]VYPSESR.Q	4YM7_2_RPA2	1	RPA2	KVYPSESR	120	126.127	5803.12	127.13	22462.4	6110.6	23549.4	3.85386	0.25948	-1.9463
				-141	31.6669	JL033021_040221_RPA2HFH_Q2_10to1_50B.12894.12894.5	NP	7.843	0.252605	1.64e-12	//11	23//191	6.80275	1.38	K.LSVSVEQVSIAK[1230.66]PM[147.04]SNDGVSSAVER.K	4YM7_2_RPA2	1	RPA2	LSVSVEQVSIAKPMSNDGVSSAVER	106	//9	6//47	1.04025	0.8125	R.K[2870.47]VYPSESR.Q	4YM7_2_RPA2	1	RPA2	KVYPSESR	120	126.127	45500.4	127.13	7834.46	49280	4310.57	0.0874708	11.4324	3.51505
				-1	6.34121	JL033021_040221_RPA2HFH_Q2_1to2_50B.12801.12801.5	N	7.80625	0.223598		//9	6//45	1.42925	0.8125	R.K[3011.54]VYPSESR.Q	4YM7_2_RPA2	1	RPA2	KVYPSESR	120	//16	23//196	6.377	1.3125	K.LSVSVEQVSIAK[1371.74]PM[147.04]SNDGVSSAVER.K	4YM7_2_RPA2	1	RPA2	LSVSVEQVSIAKPMSNDGVSSAVER	106	126.127	64325.1	127.13	112872	68840.5	115176	1.67309	0.597696	-0.742516
				-141	31.4199	JL033021_040221_RPA2HFH_Q2_1to10_100B.13043.13043.5	NP	7.75475	0.242856	8.46e-09	//11	21//191	6.59675	1.22	K.LSVSVEQVSIAK[1230.66]PM[147.04]SNDGVSSAVER.K	4YM7_2_RPA2	1	RPA2	LSVSVEQVSIAKPMSNDGVSSAVER	106	//9	6//47	1.158	0.8125	R.K[2870.47]VYPSESR.Q	4YM7_2_RPA2	1	RPA2	KVYPSESR	120	126.127	12133.9	127.131	81460.3	12496.3	86202.1	6.89821	0.144965	-2.78622
				-142	30.2015	JL033021_040221_RPA2HFH_Q2_1to5_1ug.13054.13054.5	P	7.6845	0.217737	0.00256	//11	23//191	6.368	1.18	K.LSVSVEQVSIAK[1230.66]PM[147.04]SNDGVSSAVER.K	4YM7_2_RPA2	1	RPA2	LSVSVEQVSIAKPMSNDGVSSAVER	106	1//9	7//47	1.3165	0.875	R.K[2870.47]VYPSESR.Q	4YM7_2_RPA2	1	RPA2	KVYPSESR	120	126.127	17083.6	127.13	62287.3	18020	65212.3	3.61888	0.276329	-1.85554
				-142	23.8623	JL033021_040221_RPA2HFH_Q2_1to2_D.12685.12685.5	NP	7.61275	0.275939	5.79e-12	//11	22//191	6.48325	1.36	K.LSVSVEQVSIAK[1230.66]PM[147.04]SNDGVSSAVER.K	4YM7_2_RPA2	1	RPA2	LSVSVEQVSIAKPMSNDGVSSAVER	106	//9	6//47	1.1295	0.8125	R.K[2870.47]VYPSESR.Q	4YM7_2_RPA2	1	RPA2	KVYPSESR	120	126.127	12057.9	127.131	19758.1	12915.7	20089.9	1.55547	0.642893	-0.637349
				-142	28.3079	JL033021_040221_RPA2HFH_Q2_1to5_50B.12883.12883.5	P	7.57175	0.227339	0.000354	//11	21//191	6.172	1.26	K.LSVSVEQVSIAK[1230.66]PM[147.04]SNDGVSSAVER.K	4YM7_2_RPA2	1	RPA2	LSVSVEQVSIAKPMSNDGVSSAVER	106	//9	6//47	1.39975	0.8125	R.K[2870.47]VYPSESR.Q	4YM7_2_RPA2	1	RPA2	KVYPSESR	120	126.127	34286.2	127.13	132444	36105	138846	3.84562	0.260036	-1.94322
				-1	5.23117	JL033021_040221_RPA2HFH_Q2_2to1_50B.12595.12595.5	N	7.54425	0.220489		//9	7//45	1.28075	1.0625	R.K[3011.55]VYPSESR.Q	4YM7_2_RPA2	1	RPA2	KVYPSESR	120	//16	21//196	6.2635	1.27083	K.LSVSVEQVSIAK[1371.74]PM[147.04]SNDGVSSAVER.K	4YM7_2_RPA2	1	RPA2	LSVSVEQVSIAKPMSNDGVSSAVER	106	126.128	166803	127.131	85303	180199	76434.7	0.424168	2.35756	1.23729
				-141	27.8999	JL033021_040221_RPA2HFH_Q2_2to1_50B.12188.12188.4	NP	7.47775	0.190424	0.000613	//11	28//141	6.5145	1.6	K.LSVSVEQVSIAK[1230.66]PM[147.04]SNDGVSSAVER.K	4YM7_2_RPA2	1	RPA2	LSVSVEQVSIAKPMSNDGVSSAVER	106	//9	5//38	0.96325	0.5625	R.K[2870.47]VYPSESR.Q	4YM7_2_RPA2	1	RPA2	KVYPSESR	120	126.127	168892	127.131	88842.2	182436	80039.8	0.438729	2.27931	1.1886
				-142	31.2717	JL033021_040221_RPA2HFH_Q2_2to1_D.12883.12883.5	NP	7.41625	0.28268	4.3e-06	//11	23//191	6.30525	1.38	K.LSVSVEQVSIAK[1230.66]PM[147.04]SNDGVSSAVER.K	4YM7_2_RPA2	1	RPA2	LSVSVEQVSIAKPMSNDGVSSAVER	106	//9	6//47	1.111	0.8125	R.K[2870.47]VYPSESR.Q	4YM7_2_RPA2	1	RPA2	KVYPSESR	120	126.127	31407.3	127.131	16876	33923	15264.5	0.449974	2.22235	1.15209
				-141	27.3859	JL033021_040221_RPA2HFH_Q2_1to2_100B.13104.13104.5	P	7.36025	0.226748	0.000319	//11	21//191	6.47925	1.16	K.LSVSVEQVSIAK[1230.66]PM[147.04]SNDGVSSAVER.K	4YM7_2_RPA2	1	RPA2	LSVSVEQVSIAKPMSNDGVSSAVER	106	//9	5//47	0.881	0.5625	R.K[2870.47]VYPSESR.Q	4YM7_2_RPA2	1	RPA2	KVYPSESR	120	126.126	29651.4	127.13	49865.6	31750.4	50773.1	1.59913	0.625339	-0.677289
				-142	31.4364	JL033021_040221_RPA2HFH_Q2_5to1_100B.13273.13273.5	NP	7.3145	0.26955	7.67e-06	//11	22//191	5.94025	1.16	K.LSVSVEQVSIAK[1230.66]PM[147.04]SNDGVSSAVER.K	4YM7_2_RPA2	1	RPA2	LSVSVEQVSIAKPMSNDGVSSAVER	106	//9	6//47	1.37425	0.8125	R.K[2870.47]VYPSESR.Q	4YM7_2_RPA2	1	RPA2	KVYPSESR	120	126.127	66370.9	127.13	17124.2	71837.9	12391.6	0.172494	5.7973	2.53538
				-141	30.7613	JL033021_040221_RPA2HFH_Q2_1to1_1ug.12894.12894.5	P	7.30925	0.224468	6.76e-06	//11	21//191	6.4055	1.04	K.LSVSVEQVSIAK[1230.66]PM[147.04]SNDGVSSAVER.K	4YM7_2_RPA2	1	RPA2	LSVSVEQVSIAKPMSNDGVSSAVER	106	1//9	7//47	0.90375	0.6875	R.K[2870.47]VYPSESR.Q	4YM7_2_RPA2	1	RPA2	KVYPSESR	120	126.127	38118.2	127.13	37697.7	41031.4	36974.2	0.901121	1.10973	0.150208
				-141	31.0083	JL033021_040221_RPA2HFH_Q2_1to10_D.13356.13356.5	P	7.30025	0.244687	6.59e-16	//11	17//191	6.46675	0.92	K.LSVSVEQVSIAK[1230.66]PM[147.04]SNDGVSSAVER.K	4YM7_2_RPA2	1	RPA2	LSVSVEQVSIAKPMSNDGVSSAVER	106	//9	5//47	0.8335	0.5625	R.K[2870.47]VYPSESR.Q	4YM7_2_RPA2	1	RPA2	KVYPSESR	120	126.126	3282.68	127.13	20008.4	3397.23	21145.9	6.22447	0.160656	-2.63795
				-141	28.6208	JL033021_040221_RPA2HFH_Q2_2to1_50B.12356.12356.5	P	7.2595	0.213082	0.000368	//11	23//191	6.44425	1.24	K.LSVSVEQVSIAK[1230.66]PM[147.04]SNDGVSSAVER.K	4YM7_2_RPA2	1	RPA2	LSVSVEQVSIAKPMSNDGVSSAVER	106	//9	6//47	0.81525	0.625	R.K[2870.47]VYPSESR.Q	4YM7_2_RPA2	1	RPA2	KVYPSESR	120	126.127	156190	127.13	80812.8	168726	72575.9	0.430141	2.32482	1.21712
				-141	23.3519	JL033021_040221_RPA2HFH_Q2_10to1_100B.13361.13361.5	P	7.23875	0.23998	0.0711	//11	20//191	6.345	1.2	K.LSVSVEQVSIAK[1230.66]PM[147.04]SNDGVSSAVER.K	4YM7_2_RPA2	1	RPA2	LSVSVEQVSIAKPMSNDGVSSAVER	106	//9	5//47	0.89375	0.5625	R.K[2870.47]VYPSESR.Q	4YM7_2_RPA2	1	RPA2	KVYPSESR	120	126.127	58652.6	127.13	10439.5	63522	5921.36	0.0932174	10.7276	3.42326
				-141	29.8099	JL033021_040221_RPA2HFH_Q2_5to1_1ug.12810.12810.4	NP	7.10425	0.176877	6.15e-12	//11	27//141	6.134	1.44	K.LSVSVEQVSIAK[1230.66]PM[147.04]SNDGVSSAVER.K	4YM7_2_RPA2	1	RPA2	LSVSVEQVSIAKPMSNDGVSSAVER	106	//9	5//38	0.97025	0.5625	R.K[2870.47]VYPSESR.Q	4YM7_2_RPA2	1	RPA2	KVYPSESR	120	126.127	198277	127.13	55227.4	214577	41380.7	0.192848	5.18543	2.37446
				-142	27.567	JL033021_040221_RPA2HFH_Q2_2to1_50B.12411.12411.5	P	6.99575	0.191544	0.00219	//11	26//191	6.09475	1.38	K.LSVSVEQVSIAK[1230.66]PM[147.04]SNDGVSSAVER.K	4YM7_2_RPA2	1	RPA2	LSVSVEQVSIAKPMSNDGVSSAVER	106	1//9	7//47	0.901	0.875	R.K[2870.47]VYPSESR.Q	4YM7_2_RPA2	1	RPA2	KVYPSESR	120	126.127	191040	127.13	96305.3	206394	86048.7	0.416915	2.39857	1.26218
				-141	32.5761	JL033021_040221_RPA2HFH_Q2_1to5_1ug.12820.12820.4	NP	6.99575	0.163086	7.14e-05	//11	28//141	6.03325	1.5	K.LSVSVEQVSIAK[1230.66]PM[147.04]SNDGVSSAVER.K	4YM7_2_RPA2	1	RPA2	LSVSVEQVSIAKPMSNDGVSSAVER	106	//9	5//38	0.9625	0.5625	R.K[2870.47]VYPSESR.Q	4YM7_2_RPA2	1	RPA2	KVYPSESR	120	126.127	19221.8	127.13	83301.9	20167.9	87539.2	4.34052	0.230387	-2.11787
				-141	30.1027	JL033021_040221_RPA2HFH_Q2_1to10_D.13292.13292.5	NP	6.98375	0.228115	1.03e-16	//11	18//191	5.562	0.98	K.LSVSVEQVSIAK[1230.66]PM[147.04]SNDGVSSAVER.K	4YM7_2_RPA2	1	RPA2	LSVSVEQVSIAKPMSNDGVSSAVER	106	//9	6//47	1.42175	0.8125	R.K[2870.47]VYPSESR.Q	4YM7_2_RPA2	1	RPA2	KVYPSESR	120	126.127	3221.19	127.13	17665.6	3349.59	18640.9	5.56513	0.17969	-2.47642
				-141	30.6002	JL033021_040221_RPA2HFH_Q2_1to1_1ug.12767.12767.4	NP	6.85125	0.165593	8.51e-05	//11	25//141	5.935	1.4	K.LSVSVEQVSIAK[1230.66]PM[147.04]SNDGVSSAVER.K	4YM7_2_RPA2	1	RPA2	LSVSVEQVSIAKPMSNDGVSSAVER	106	//9	5//38	0.91625	0.5625	R.K[2870.47]VYPSESR.Q	4YM7_2_RPA2	1	RPA2	KVYPSESR	120	126.127	99755.1	127.131	109121	107294	107977	1.00637	0.993674	-0.00915595
				-141	28.1268	JL033021_040221_RPA2HFH_Q2_1to10_D.13551.13551.5	NP	6.821	0.245157	1.51e-13	//11	19//191	5.683	1.12	K.LSVSVEQVSIAK[1230.66]PM[147.04]SNDGVSSAVER.K	4YM7_2_RPA2	1	RPA2	LSVSVEQVSIAKPMSNDGVSSAVER	106	//9	6//47	1.138	0.8125	R.K[2870.47]VYPSESR.Q	4YM7_2_RPA2	1	RPA2	KVYPSESR	120	126.127	3012.64	127.13	20794	3097.98	22012	7.10528	0.14074	-2.82889
				-141	30.4685	JL033021_040221_RPA2HFH_Q2_1to2_1ug.12811.12811.4	NP	6.8045	0.167675	0.000282	//11	25//141	5.78475	1.4	K.LSVSVEQVSIAK[1230.66]PM[147.04]SNDGVSSAVER.K	4YM7_2_RPA2	1	RPA2	LSVSVEQVSIAKPMSNDGVSSAVER	106	//9	5//38	1.01975	0.5625	R.K[2870.47]VYPSESR.Q	4YM7_2_RPA2	1	RPA2	KVYPSESR	120	126.127	41705.3	127.13	73316.5	44631.8	74820.6	1.6764	0.596517	-0.745364
				-142	29.9545	JL033021_040221_RPA2HFH_Q2_1to5_50B.12485.12485.5	P	6.7875	0.225633	0.0149	//11	21//191	5.502	1.1	K.LSVSVEQVSIAK[1230.66]PM[147.04]SNDGVSSAVER.K	4YM7_2_RPA2	1	RPA2	LSVSVEQVSIAKPMSNDGVSSAVER	106	//9	6//47	1.2855	0.8125	R.K[2870.47]VYPSESR.Q	4YM7_2_RPA2	1	RPA2	KVYPSESR	120	126.127	29212.7	127.13	111869	30770.4	117254	3.81061	0.262425	-1.93002
				-141	31.1729	JL033021_040221_RPA2HFH_Q2_1to5_D.13321.13321.5	P	6.78125	0.21463	1.17e-11	//11	21//191	5.968	1.22	K.LSVSVEQVSIAK[1230.66]PM[147.04]SNDGVSSAVER.K	4YM7_2_RPA2	1	RPA2	LSVSVEQVSIAKPMSNDGVSSAVER	106	//9	5//47	0.81325	0.5625	R.K[2870.47]VYPSESR.Q	4YM7_2_RPA2	1	RPA2	KVYPSESR	120	126.126	5003.37	127.13	18204.7	5277.93	19058.6	3.61101	0.276931	-1.8524
				-141	28.2292	JL033021_040221_RPA2HFH_Q2_1to2_50B.12479.12479.4	NP	6.76175	0.160803	0.00172	//11	25//141	5.62925	1.28	K.LSVSVEQVSIAK[1230.66]PM[147.04]SNDGVSSAVER.K	4YM7_2_RPA2	1	RPA2	LSVSVEQVSIAKPMSNDGVSSAVER	106	//9	6//38	1.1325	0.75	R.K[2870.47]VYPSESR.Q	4YM7_2_RPA2	1	RPA2	KVYPSESR	120	126.127	133643	127.13	255673	142852	261977	1.8339	0.545286	-0.874915
				-141	28.0316	JL033021_040221_RPA2HFH_Q2_1to10_1ug.12893.12893.4	P	6.75075	0.166941	0.000183	//11	26//141	5.929	1.42	K.LSVSVEQVSIAK[1230.66]PM[147.04]SNDGVSSAVER.K	4YM7_2_RPA2	1	RPA2	LSVSVEQVSIAKPMSNDGVSSAVER	106	//9	5//38	0.82175	0.5625	R.K[2870.47]VYPSESR.Q	4YM7_2_RPA2	1	RPA2	KVYPSESR	120	126.128	23578.2	127.131	171764	24172.7	181942	7.52674	0.13286	-2.91203
				-142	29.7898	JL033021_040221_RPA2HFH_Q2_2to1_D.12980.12980.5	P	6.72975	0.252533	1.02e-05	//11	20//191	5.75775	1.18	K.LSVSVEQVSIAK[1230.66]PM[147.04]SNDGVSSAVER.K	4YM7_2_RPA2	1	RPA2	LSVSVEQVSIAKPMSNDGVSSAVER	106	//9	7//47	0.972	1.0625	R.K[2870.47]VYPSESR.Q	4YM7_2_RPA2	1	RPA2	KVYPSESR	120	126.127	24797.9	127.131	13026	26786.7	11732.3	0.437989	2.28316	1.19103
				-141	31.7492	JL033021_040221_RPA2HFH_Q2_1to5_D.13466.13466.5	NP	6.645	0.223249	1.21e-11	//11	19//191	5.06325	0.92	K.LSVSVEQVSIAK[1230.66]PM[147.04]SNDGVSSAVER.K	4YM7_2_RPA2	1	RPA2	LSVSVEQVSIAKPMSNDGVSSAVER	106	//9	7//47	1.58175	1.0625	R.K[2870.47]VYPSESR.Q	4YM7_2_RPA2	1	RPA2	KVYPSESR	120	126.127	5691.53	127.13	20762	6003.42	21737.3	3.62081	0.276181	-1.85631
				-141	31.0612	JL033021_040221_RPA2HFH_Q2_2to1_1ug.12776.12776.4	P	6.6295	0.193195	0.01	//11	23//141	5.79575	1.38	K.LSVSVEQVSIAK[1230.66]PM[147.04]SNDGVSSAVER.K	4YM7_2_RPA2	1	RPA2	LSVSVEQVSIAKPMSNDGVSSAVER	106	//9	5//38	0.83375	0.5625	R.K[2870.47]VYPSESR.Q	4YM7_2_RPA2	1	RPA2	KVYPSESR	120	126.127	47694	127.13	24308.2	51524.9	21766.6	0.422447	2.36716	1.24316
				-141	30.6002	JL033021_040221_RPA2HFH_Q2_1to10_50B.12707.12707.4	NP	6.59775	0.16644	1.63e-05	//11	24//141	5.67425	1.26	K.LSVSVEQVSIAK[1230.66]PM[147.04]SNDGVSSAVER.K	4YM7_2_RPA2	1	RPA2	LSVSVEQVSIAKPMSNDGVSSAVER	106	//9	5//38	0.9235	0.5625	R.K[2870.47]VYPSESR.Q	4YM7_2_RPA2	1	RPA2	KVYPSESR	120	126.127	42223.8	127.13	314165	43235.2	332863	7.69889	0.129889	-2.94465
				-141	33.5604	JL033021_040221_RPA2HFH_Q2_1to5_D.13656.13656.5	P	6.55625	0.230781	1.05e-06	//11	16//191	5.6945	0.9	K.LSVSVEQVSIAK[1230.66]PM[147.04]SNDGVSSAVER.K	4YM7_2_RPA2	1	RPA2	LSVSVEQVSIAKPMSNDGVSSAVER	106	//9	5//47	0.86175	0.5625	R.K[2870.47]VYPSESR.Q	4YM7_2_RPA2	1	RPA2	KVYPSESR	120	126.127	3863.42	127.13	12561.1	4087.59	13113.4	3.2081	0.311711	-1.68172
				-141	31.4199	JL033021_040221_RPA2HFH_Q2_1to5_1ug.12974.12974.5	NP	6.55125	0.205323	3.24e-06	//11	18//191	5.18125	0.84	K.LSVSVEQVSIAK[1230.66]PM[147.04]SNDGVSSAVER.K	4YM7_2_RPA2	1	RPA2	LSVSVEQVSIAKPMSNDGVSSAVER	106	1//9	7//47	1.37	0.875	R.K[2870.47]VYPSESR.Q	4YM7_2_RPA2	1	RPA2	KVYPSESR	120	126.127	15021.3	127.13	60844.9	15795.3	63851.8	4.04246	0.247374	-2.01523
				-141	26.2333	JL033021_040221_RPA2HFH_Q2_2to1_D.13002.13002.5	NP	6.54775	0.272681	3.3e-07	//11	20//191	5.374	1.2	K.LSVSVEQVSIAK[1230.66]PM[147.04]SNDGVSSAVER.K	4YM7_2_RPA2	1	RPA2	LSVSVEQVSIAKPMSNDGVSSAVER	106	//9	6//47	1.17375	0.8125	R.K[2870.47]VYPSESR.Q	4YM7_2_RPA2	1	RPA2	KVYPSESR	120	126.127	22306	127.131	11516.6	24096.6	10338.5	0.429043	2.33077	1.2208
				-141	31.5846	JL033021_040221_RPA2HFH_Q2_1to10_D.13186.13186.5	P	6.4925	0.221443	3.66e-13	//11	19//191	5.5555	1	K.LSVSVEQVSIAK[1230.66]PM[147.04]SNDGVSSAVER.K	4YM7_2_RPA2	1	RPA2	LSVSVEQVSIAKPMSNDGVSSAVER	106	//9	5//47	0.937	0.5625	R.K[2870.47]VYPSESR.Q	4YM7_2_RPA2	1	RPA2	KVYPSESR	120	126.126	2623.66	127.13	15347.5	2720.45	16210.6	5.95878	0.16782	-2.57502
				-141	30.432	JL033021_040221_RPA2HFH_Q2_2to1_1ug.12962.12962.5	NP	6.4685	0.197959	1.83e-05	//11	21//191	5.35475	0.98	K.LSVSVEQVSIAK[1230.66]PM[147.04]SNDGVSSAVER.K	4YM7_2_RPA2	1	RPA2	LSVSVEQVSIAKPMSNDGVSSAVER	106	//9	6//47	1.11375	0.8125	R.K[2870.47]VYPSESR.Q	4YM7_2_RPA2	1	RPA2	KVYPSESR	120	126.126	56638.7	127.13	26283	61209.2	23079.8	0.377064	2.65207	1.40712
				-141	27.4389	JL033021_040221_RPA2HFH_Q2_1to1_50B.12816.12816.4	NP	6.46575	0.173874	1.5e-08	//11	24//141	5.5365	1.26	K.LSVSVEQVSIAK[1230.66]PM[147.04]SNDGVSSAVER.K	4YM7_2_RPA2	1	RPA2	LSVSVEQVSIAKPMSNDGVSSAVER	106	//9	5//38	0.92925	0.5625	R.K[2870.47]VYPSESR.Q	4YM7_2_RPA2	1	RPA2	KVYPSESR	120	126.127	33704.1	127.13	35403.1	36263.1	34911.6	0.96273	1.03871	0.0547962
				-141	31.9174	JL033021_040221_RPA2HFH_Q2_5to1_50B.12807.12807.4	NP	6.45625	0.159455	2.32e-07	//11	25//141	5.53275	1.4	K.LSVSVEQVSIAK[1230.66]PM[147.04]SNDGVSSAVER.K	4YM7_2_RPA2	1	RPA2	LSVSVEQVSIAKPMSNDGVSSAVER	106	//9	5//38	0.9235	0.5625	R.K[2870.47]VYPSESR.Q	4YM7_2_RPA2	1	RPA2	KVYPSESR	120	126.127	157756	127.131	41331	170745	30127.3	0.176446	5.66747	2.5027
				-141	30.5966	JL033021_040221_RPA2HFH_Q2_1to1_100B.13221.13221.5	P	6.43675	0.225811	9.91e-06	//11	20//191	5.71775	1.2	K.LSVSVEQVSIAK[1230.66]PM[147.04]SNDGVSSAVER.K	4YM7_2_RPA2	1	RPA2	LSVSVEQVSIAKPMSNDGVSSAVER	106	//9	5//47	0.719	0.5625	R.K[2870.47]VYPSESR.Q	4YM7_2_RPA2	1	RPA2	KVYPSESR	120	126.127	40333.6	127.13	37086.7	43438.9	36120.5	0.831525	1.20261	0.266168
				-2	3.21986	JL033021_040221_RPA2HFH_Q2_2to1_100B.13123.13123.5	N	6.2865	0.206929		//9	6//45	0.90275	0.625	R.K[3011.56]VYPSESR.Q	4YM7_2_RPA2	1	RPA2	KVYPSESR	120	//16	24//196	5.38375	1.14583	K.LSVSVEQVSIAK[1371.75]PM[147.04]SNDGVSSAVER.K	4YM7_2_RPA2	1	RPA2	LSVSVEQVSIAKPMSNDGVSSAVER	106	126.127	64425.1	127.13	33392.4	69595.4	29999.1	0.43105	2.31992	1.21407
				-141	27.9657	JL033021_040221_RPA2HFH_Q2_10to1_1ug.12753.12753.4	P	6.196	0.166327	0.0247	//11	24//141	5.2855	1.3	K.LSVSVEQVSIAK[1230.66]PM[147.04]SNDGVSSAVER.K	4YM7_2_RPA2	1	RPA2	LSVSVEQVSIAKPMSNDGVSSAVER	106	//9	5//38	0.9105	0.5625	R.K[2870.47]VYPSESR.Q	4YM7_2_RPA2	1	RPA2	KVYPSESR	120	126.127	96503.7	127.13	15251.9	104531	7680.24	0.0734732	13.6104	3.76664
				-143	34.3343	JL033021_040221_RPA2HFH_Q2_1to10_100B.13202.13202.5	P	6.16925	0.210522	0.000185	//11	18//191	5.11725	0.92	K.LSVSVEQVSIAK[1230.66]PM[147.04]SNDGVSSAVER.K	4YM7_2_RPA2	1	RPA2	LSVSVEQVSIAKPMSNDGVSSAVER	106	//9	5//47	1.052	0.625	R.K[2870.47]VYPSESR.Q	4YM7_2_RPA2	1	RPA2	KVYPSESR	120	126.126	10927.6	127.129	67964.6	11297.8	71848.6	6.3595	0.157245	-2.66891
				-141	28.8878	JL033021_040221_RPA2HFH_Q2_1to5_50B.12501.12501.4	NP	6.072	0.155159	0.0171	//11	25//141	5.14575	1.28	K.LSVSVEQVSIAK[1230.66]PM[147.04]SNDGVSSAVER.K	4YM7_2_RPA2	1	RPA2	LSVSVEQVSIAKPMSNDGVSSAVER	106	//9	5//38	0.92625	0.5625	R.K[2870.47]VYPSESR.Q	4YM7_2_RPA2	1	RPA2	KVYPSESR	120	126.127	26115.2	127.13	100810	27501.2	105682	3.8428	0.260227	-1.94216
				-142	30.6131	JL033021_040221_RPA2HFH_Q2_1to1_100B.13214.13214.5	P	6.07125	0.216567	0.000361	//11	19//191	5.463	1.12	K.LSVSVEQVSIAK[1230.66]PM[147.04]SNDGVSSAVER.K	4YM7_2_RPA2	1	RPA2	LSVSVEQVSIAKPMSNDGVSSAVER	106	//9	4//47	0.60825	0.375	R.K[2870.47]VYPSESR.Q	4YM7_2_RPA2	1	RPA2	KVYPSESR	120	126.126	38930	127.13	39586.8	41896.5	38925.6	0.929091	1.07632	0.106108
				-141	25.2654	JL033021_040221_RPA2HFH_Q2_1to5_50B.12702.12702.4	P	5.95625	0.164553	0.000125	//11	20//141	5.4625	1.2	K.LSVSVEQVSIAK[1230.66]PM[147.04]SNDGVSSAVER.K	4YM7_2_RPA2	1	RPA2	LSVSVEQVSIAKPMSNDGVSSAVER	106	//9	3//38	0.49375	0.3125	R.K[2870.47]VYPSESR.Q	4YM7_2_RPA2	1	RPA2	KVYPSESR	120	126.127	15927.8	127.13	71396	16692.5	75076.7	4.49764	0.222339	-2.16917
				-140	31.8151	JL033021_040221_RPA2HFH_Q2_10to1_1ug.12923.12923.5	P	5.93325	0.189002	0.646	//11	20//191	4.593	0.96	K.LSVSVEQVSIAK[1230.66]PM[147.04]SNDGVSSAVER.K	4YM7_2_RPA2	1	RPA2	LSVSVEQVSIAKPMSNDGVSSAVER	106	1//9	8//47	1.34025	1.125	R.K[2870.47]VYPSESR.Q	4YM7_2_RPA2	1	RPA2	KVYPSESR	120	126.127	74746.8	127.13	12478.8	80959.1	6661.83	0.0822863	12.1527	3.6032
				-142	26.0028	JL033021_040221_RPA2HFH_Q2_1to5_100B.13113.13113.5	NP	5.916	0.200733	1.08e-06	//11	18//191	4.9	0.86	K.LSVSVEQVSIAK[1230.66]PM[147.04]SNDGVSSAVER.K	4YM7_2_RPA2	1	RPA2	LSVSVEQVSIAKPMSNDGVSSAVER	106	//9	6//47	1.016	0.8125	R.K[2870.47]VYPSESR.Q	4YM7_2_RPA2	1	RPA2	KVYPSESR	120	126.127	16299.3	127.13	57390.8	17209.3	60035.7	3.48857	0.28665	-1.80264
				-141	30.7613	JL033021_040221_RPA2HFH_Q2_1to10_D.13816.13816.5	NP	5.88125	0.218906	1.81e-10	//11	18//191	4.9485	0.82	K.LSVSVEQVSIAK[1230.66]PM[147.04]SNDGVSSAVER.K	4YM7_2_RPA2	1	RPA2	LSVSVEQVSIAKPMSNDGVSSAVER	106	//9	5//47	0.93275	0.5625	R.K[2870.47]VYPSESR.Q	4YM7_2_RPA2	1	RPA2	KVYPSESR	120	126.127	2249.97	127.13	14709.9	2320.38	15560.9	6.7062	0.149116	-2.7455
				-141	36.0302	JL033021_040221_RPA2HFH_Q2_1to2_100B.13277.13277.5	NP	5.867	0.213785	0.00115	//11	17//191	4.814	0.92	K.LSVSVEQVSIAK[1230.66]PM[147.04]SNDGVSSAVER.K	4YM7_2_RPA2	1	RPA2	LSVSVEQVSIAKPMSNDGVSSAVER	106	//9	6//47	1.053	0.8125	R.K[2870.47]VYPSESR.Q	4YM7_2_RPA2	1	RPA2	KVYPSESR	120	126.127	29938.7	127.13	47533.8	32081	48248.7	1.50396	0.66491	-0.588768
				-141	21.1515	JL033021_040221_RPA2HFH_Q2_1to2_50B.12426.12426.4	P	5.864	0.153925	0.663	//11	19//141	5.41525	1.16	K.LSVSVEQVSIAK[1230.66]PMSNDGVSSAVER.K	4YM7_2_RPA2	1	RPA2	LSVSVEQVSIAKPMSNDGVSSAVER	106	//9	3//38	0.44875	0.3125	R.K[2854.47]VYPSESR.Q	4YM7_2_RPA2	1	RPA2	KVYPSESR	120	126.127	30345.7	127.131	50107.8	32501.5	50970.3	1.56825	0.637655	-0.649153
				-142	32.4243	JL033021_040221_RPA2HFH_Q2_1to10_1ug.13111.13111.5	P	5.8225	0.179543	0.0605	//11	18//191	4.919	0.82	K.LSVSVEQVSIAK[1230.66]PM[147.04]SNDGVSSAVER.K	4YM7_2_RPA2	1	RPA2	LSVSVEQVSIAKPMSNDGVSSAVER	106	//9	5//47	0.9035	0.5625	R.K[2870.47]VYPSESR.Q	4YM7_2_RPA2	1	RPA2	KVYPSESR	120	126.127	10111.3	127.13	64811.3	10438.2	68542.9	6.56653	0.152287	-2.71513
				-142	22.9567	JL033021_040221_RPA2HFH_Q2_1to1_50B.13202.13202.5	P	5.8	0.178599	1.09e-07	//11	18//191	5.091	1.02	K.LSVSVEQVSIAK[1230.66]PM[147.04]SNDGVSSAVER.K	4YM7_2_RPA2	1	RPA2	LSVSVEQVSIAKPMSNDGVSSAVER	106	//9	5//47	0.709	0.5625	R.K[2870.47]VYPSESR.Q	4YM7_2_RPA2	1	RPA2	KVYPSESR	120	126.127	37784.3	127.13	34307	40696.9	33370.7	0.819981	1.21954	0.286337
				-140	28.6043	JL033021_040221_RPA2HFH_Q2_10to1_100B.13338.13338.5	P	5.78125	0.204776	0.0933	//11	20//191	5.084	0.94	K.LSVSVEQVSIAK[1230.66]PM[147.04]SNDGVSSAVER.K	4YM7_2_RPA2	1	RPA2	LSVSVEQVSIAKPMSNDGVSSAVER	106	//9	5//47	0.69725	0.5625	R.K[2870.47]VYPSESR.Q	4YM7_2_RPA2	1	RPA2	KVYPSESR	120	126.127	54834.5	127.13	9222.57	59391.3	4960.09	0.0835154	11.9738	3.58181
				-141	29.1971	JL033021_040221_RPA2HFH_Q2_1to2_D.13175.13175.5	NP	5.74625	0.209373	3.3e-14	//11	16//191	4.38325	0.7	K.LSVSVEQVSIAK[1230.66]PM[147.04]SNDGVSSAVER.K	4YM7_2_RPA2	1	RPA2	LSVSVEQVSIAKPMSNDGVSSAVER	106	//9	6//47	1.363	0.8125	R.K[2870.47]VYPSESR.Q	4YM7_2_RPA2	1	RPA2	KVYPSESR	120	126.127	6562.54	127.13	11551.3	7022.92	11789	1.67865	0.595716	-0.747304
				-143	31.7821	JL033021_040221_RPA2HFH_Q2_1to1_100B.13346.13346.5	P	5.73	0.210441	2.58e-05	//11	17//191	4.99175	0.9	K.LSVSVEQVSIAK[1230.66]PM[147.04]SNDGVSSAVER.K	4YM7_2_RPA2	1	RPA2	LSVSVEQVSIAKPMSNDGVSSAVER	106	//9	5//47	0.73825	0.5625	R.K[2870.47]VYPSESR.Q	4YM7_2_RPA2	1	RPA2	KVYPSESR	120	126.127	36791	127.13	33958	39622.6	33085.9	0.835026	1.19757	0.260106
				-142	27.1554	JL033021_040221_RPA2HFH_Q2_1to2_100B.13093.13093.5	P	5.7275	0.195058	0.00511	//11	20//191	4.87475	0.96	K.LSVSVEQVSIAK[1230.66]PM[147.04]SNDGVSSAVER.K	4YM7_2_RPA2	1	RPA2	LSVSVEQVSIAKPMSNDGVSSAVER	106	//9	5//47	0.85275	0.5625	R.K[2870.47]VYPSESR.Q	4YM7_2_RPA2	1	RPA2	KVYPSESR	120	126.126	30279.2	127.13	50033.2	32429.9	50896.4	1.56943	0.637174	-0.650241
				-141	30.5143	JL033021_040221_RPA2HFH_Q2_5to1_D.12588.12588.5	P	5.7195	0.206026	0.0312	//11	16//191	4.99175	0.82	K.LSVSVEQVSIAK[1230.66]PM[147.04]SNDGVSSAVER.K	4YM7_2_RPA2	1	RPA2	LSVSVEQVSIAKPMSNDGVSSAVER	106	//9	5//47	0.72775	0.5625	R.K[2870.47]VYPSESR.Q	4YM7_2_RPA2	1	RPA2	KVYPSESR	120	126.127	17930.4	127.13	4672.03	19407	3396.79	0.175029	5.71333	2.51433
				-141	32.1608	JL033021_040221_RPA2HFH_Q2_1to10_D.13460.13460.5	NP	5.6955	0.210446	7.44e-13	//11	17//191	4.63175	0.92	K.LSVSVEQVSIAK[1230.66]PM[147.04]SNDGVSSAVER.K	4YM7_2_RPA2	1	RPA2	LSVSVEQVSIAKPMSNDGVSSAVER	106	//9	6//47	1.06375	0.8125	R.K[2870.47]VYPSESR.Q	4YM7_2_RPA2	1	RPA2	KVYPSESR	120	126.127	2623.53	127.13	15075.2	2722.52	15918.8	5.84709	0.171025	-2.54772
				-1	1.82178	JL033021_040221_RPA2HFH_Q2_1to2_1ug.13208.13208.5	N	5.66075	0.169326		//9	6//45	1.19925	0.8125	R.K[3011.56]VYPSESR.Q	4YM7_2_RPA2	1	RPA2	KVYPSESR	120	//16	19//196	4.4615	1.08333	K.LSVSVEQVSIAK[1371.75]PM[147.04]SNDGVSSAVER.K	4YM7_2_RPA2	1	RPA2	LSVSVEQVSIAKPMSNDGVSSAVER	106	126.127	31709.5	127.13	52736.4	33959	53664.7	1.58028	0.6328	-0.66018
				-142	32.0127	JL033021_040221_RPA2HFH_Q2_1to10_D.14064.14064.5	P	5.63375	0.210631	1.4e-09	//11	17//191	4.7515	0.9	K.LSVSVEQVSIAK[1230.66]PM[147.04]SNDGVSSAVER.K	4YM7_2_RPA2	1	RPA2	LSVSVEQVSIAKPMSNDGVSSAVER	106	//9	5//47	0.88225	0.5625	R.K[2870.47]VYPSESR.Q	4YM7_2_RPA2	1	RPA2	KVYPSESR	120	126.127	2077.61	127.13	13130.7	2146.31	13884.1	6.46882	0.154588	-2.6935
				-142	31.9174	JL033021_040221_RPA2HFH_Q2_1to5_50B.12491.12491.4	P	5.53775	0.152477	0.000339	//11	24//141	4.65825	1.14	K.LSVSVEQVSIAK[1230.66]PM[147.04]SNDGVSSAVER.K	4YM7_2_RPA2	1	RPA2	LSVSVEQVSIAKPMSNDGVSSAVER	106	//9	5//38	0.8795	0.5625	R.K[2870.47]VYPSESR.Q	4YM7_2_RPA2	1	RPA2	KVYPSESR	120	126.127	21405.5	127.13	83400.3	22535.3	87448.6	3.88052	0.257697	-1.95625
				-142	33.1652	JL033021_040221_RPA2HFH_Q2_1to5_D.13874.13874.5	P	5.48525	0.206877	0.0151	//11	17//191	4.67025	0.72	K.LSVSVEQVSIAK[1230.66]PM[147.04]SNDGVSSAVER.K	4YM7_2_RPA2	1	RPA2	LSVSVEQVSIAKPMSNDGVSSAVER	106	//9	5//47	0.815	0.5625	R.K[2870.47]VYPSESR.Q	4YM7_2_RPA2	1	RPA2	KVYPSESR	120	126.127	3418.03	127.13	12115.3	3608.21	12675.7	3.51302	0.284655	-1.81271
				-141	33.7251	JL033021_040221_RPA2HFH_Q2_2to1_D.12641.12641.5	P	5.374	0.198171	5.12e-05	//11	17//191	4.5455	0.9	K.LSVSVEQVSIAK[1230.66]PM[147.04]SNDGVSSAVER.K	4YM7_2_RPA2	1	RPA2	LSVSVEQVSIAKPMSNDGVSSAVER	106	//9	5//47	0.8285	0.5625	R.K[2870.47]VYPSESR.Q	4YM7_2_RPA2	1	RPA2	KVYPSESR	120	126.127	15783.9	127.13	6361.1	17065.4	5399.48	0.3164	3.16056	1.66018
				-141	29.797	JL033021_040221_RPA2HFH_Q2_1to5_50B.12556.12556.3	NP	5.36675	0.153285	0.031	//11	16//91	4.07425	0.86	K.LSVSVEQVSIAK[1230.66]PM[147.04]SNDGVSSAVER.K	4YM7_2_RPA2	1	RPA2	LSVSVEQVSIAKPMSNDGVSSAVER	106	//9	5//29	1.2925	0.75	R.K[2870.47]VYPSESR.Q	4YM7_2_RPA2	1	RPA2	KVYPSESR	120	126.127	47897.3	127.13	186005	50430.3	195020	3.86712	0.25859	-1.95126
				-141	25.3277	JL033021_040221_RPA2HFH_Q2_1to1_100B.13341.13341.5	P	5.35025	0.180538	0.000484	//11	19//191	4.709	0.88	K.LSVSVEQVSIAK[1230.66]PM[147.04]SNDGVSSAVER.K	4YM7_2_RPA2	1	RPA2	LSVSVEQVSIAKPMSNDGVSSAVER	106	//9	4//47	0.64125	0.375	R.K[2870.47]VYPSESR.Q	4YM7_2_RPA2	1	RPA2	KVYPSESR	120	126.126	38062.9	127.13	34371.2	40998.5	33414.5	0.815019	1.22697	0.295095
				-141	28.5385	JL033021_040221_RPA2HFH_Q2_2to1_D.13199.13199.5	P	5.26025	0.174629	1.04e-05	//11	17//191	4.4265	0.76	K.LSVSVEQVSIAK[1230.66]PM[147.04]SNDGVSSAVER.K	4YM7_2_RPA2	1	RPA2	LSVSVEQVSIAKPMSNDGVSSAVER	106	//9	5//47	0.83375	0.5625	R.K[2870.47]VYPSESR.Q	4YM7_2_RPA2	1	RPA2	KVYPSESR	120	126.127	20429.7	127.13	10000	22074	8881.82	0.402365	2.48531	1.31342
				-142	26.0028	JL033021_040221_RPA2HFH_Q2_1to5_100B.13108.13108.5	P	5.23875	0.181579	9.14e-06	//11	18//191	4.4325	0.86	K.LSVSVEQVSIAK[1230.66]PM[147.04]SNDGVSSAVER.K	4YM7_2_RPA2	1	RPA2	LSVSVEQVSIAKPMSNDGVSSAVER	106	//9	5//47	0.80625	0.5625	R.K[2870.47]VYPSESR.Q	4YM7_2_RPA2	1	RPA2	KVYPSESR	120	126.127	16169.8	127.13	56273.5	17077.9	58850.1	3.44598	0.290193	-1.78491
				-141	26.5827	JL033021_040221_RPA2HFH_Q2_1to10_50B.12881.12881.4	P	5.20025	0.14547	0.127	//11	20//141	4.69625	1.06	K.LSVSVEQVSIAK[1230.66]PM[147.04]SNDGVSSAVER.K	4YM7_2_RPA2	1	RPA2	LSVSVEQVSIAKPMSNDGVSSAVER	106	//9	5//38	0.504	0.4375	R.K[2870.47]VYPSESR.Q	4YM7_2_RPA2	1	RPA2	KVYPSESR	120	126.127	9556.32	127.13	67693	9812.95	71680.6	7.3047	0.136898	-2.86882
				-142	21.8864	JL033021_040221_RPA2HFH_Q2_5to1_1ug.13122.13122.5	NP	5.1375	0.149808	0.000322	//11	17//191	4.24375	0.8	K.LSVSVEQVSIAK[1230.66]PM[147.04]SNDGVSSAVER.K	4YM7_2_RPA2	1	RPA2	LSVSVEQVSIAKPMSNDGVSSAVER	106	//9	5//47	0.89375	0.5625	R.K[2870.47]VYPSESR.Q	4YM7_2_RPA2	1	RPA2	KVYPSESR	120	126.127	68782.3	127.13	20860.7	74422.6	16179.1	0.217395	4.59991	2.20161
				-142	29.2959	JL033021_040221_RPA2HFH_Q2_1to5_100B.13275.13275.5	P	5.064	0.185088	0.357	//11	17//191	4.71125	0.8	K.LSVSVEQVSIAK[1230.66]PM[147.04]SNDGVSSAVER.K	4YM7_2_RPA2	1	RPA2	LSVSVEQVSIAKPMSNDGVSSAVER	106	//9	4//47	0.35275	0.375	R.K[2870.47]VYPSESR.Q	4YM7_2_RPA2	1	RPA2	KVYPSESR	120	126.127	14529.5	127.13	44834	15392.1	46738.9	3.03655	0.329322	-1.60243
				-143	30.9589	JL033021_040221_RPA2HFH_Q2_5to1_100B.13261.13261.5	P	4.998	0.184452	0.0142	//11	19//191	4.481	0.82	K.LSVSVEQVSIAK[1230.66]PM[147.04]SNDGVSSAVER.K	4YM7_2_RPA2	1	RPA2	LSVSVEQVSIAKPMSNDGVSSAVER	106	//9	4//47	0.517	0.375	R.K[2870.47]VYPSESR.Q	4YM7_2_RPA2	1	RPA2	KVYPSESR	120	126.127	65379.3	127.13	15955	70772.1	11227.8	0.158647	6.30329	2.65611
				-141	32.8195	JL033021_040221_RPA2HFH_Q2_1to2_D.13249.13249.5	P	4.95125	0.174303	9.74e-06	//11	16//191	4.03825	0.66	K.LSVSVEQVSIAK[1230.66]PM[147.04]SNDGVSSAVER.K	4YM7_2_RPA2	1	RPA2	LSVSVEQVSIAKPMSNDGVSSAVER	106	//9	6//47	0.913	0.625	R.K[2870.47]VYPSESR.Q	4YM7_2_RPA2	1	RPA2	KVYPSESR	120	126.127	7265.99	127.13	10229.3	7796.55	10309.2	1.32228	0.75627	-0.403026
				-142	28.3903	JL033021_040221_RPA2HFH_Q2_1to5_100B.13102.13102.5	P	4.939	0.181324	0.00926	//11	17//191	4.33575	0.78	K.LSVSVEQVSIAK[1230.66]PM[147.04]SNDGVSSAVER.K	4YM7_2_RPA2	1	RPA2	LSVSVEQVSIAKPMSNDGVSSAVER	106	//9	5//47	0.60325	0.5625	R.K[2870.47]VYPSESR.Q	4YM7_2_RPA2	1	RPA2	KVYPSESR	120	126.127	14767.8	127.13	51309.7	15597.9	53656.8	3.44001	0.290697	-1.78241
				-142	25.5172	JL033021_040221_RPA2HFH_Q2_1to10_50B.12689.12689.4	NP	4.93	0.13268	0.000172	//11	17//141	3.615	0.82	K.LSVSVEQVSIAK[1230.66]PMSNDGVSSAVER.K	4YM7_2_RPA2	1	RPA2	LSVSVEQVSIAKPMSNDGVSSAVER	106	//9	5//38	1.315	0.75	R.K[2854.47]VYPSESR.Q	4YM7_2_RPA2	1	RPA2	KVYPSESR	120	126.126	8405.89	127.13	56997.8	8652.34	60323.1	6.97189	0.143433	-2.80155
				-141	28.6244	JL033021_040221_RPA2HFH_Q2_2to1_D.12841.12841.4	P	4.91375	0.158949	2.19e-11	//11	18//141	4.15175	0.88	K.LSVSVEQVSIAK[1230.66]PM[147.04]SNDGVSSAVER.K	4YM7_2_RPA2	1	RPA2	LSVSVEQVSIAKPMSNDGVSSAVER	106	//9	4//38	0.762	0.5	R.K[2870.47]VYPSESR.Q	4YM7_2_RPA2	1	RPA2	KVYPSESR	120	126.127	24191.6	127.13	13158.8	26128.1	11929	0.45656	2.19029	1.13113
				-142	25.8381	JL033021_040221_RPA2HFH_Q2_1to2_D.13280.13280.5	P	4.9105	0.200429	3.28e-08	//11	14//191	4.31275	0.74	K.LSVSVEQVSIAK[1230.66]PM[147.04]SNDGVSSAVER.K	4YM7_2_RPA2	1	RPA2	LSVSVEQVSIAKPMSNDGVSSAVER	106	//9	5//47	0.59775	0.4375	R.K[2870.47]VYPSESR.Q	4YM7_2_RPA2	1	RPA2	KVYPSESR	120	126.127	5960.64	127.13	9804.29	6384.39	9970.99	1.56178	0.640296	-0.643188
				-141	29.3488	JL033021_040221_RPA2HFH_Q2_1to10_50B.12871.12871.4	NP	4.7735	0.134841	0.0633	//11	19//141	3.814	0.86	K.LSVSVEQVSIAK[1230.66]PM[147.04]SNDGVSSAVER.K	4YM7_2_RPA2	1	RPA2	LSVSVEQVSIAKPMSNDGVSSAVER	106	//9	6//38	0.9595	0.8125	R.K[2870.47]VYPSESR.Q	4YM7_2_RPA2	1	RPA2	KVYPSESR	120	126.127	11703.6	127.13	80094	12040.7	84776.6	7.04083	0.142029	-2.81574
				-141	28.2292	JL033021_040221_RPA2HFH_Q2_1to5_50B.12757.12757.4	P	4.765	0.125943	0.0287	//11	19//141	4.06625	0.92	K.LSVSVEQVSIAK[1230.66]PM[147.04]SNDGVSSAVER.K	4YM7_2_RPA2	1	RPA2	LSVSVEQVSIAKPMSNDGVSSAVER	106	//9	5//38	0.69875	0.5625	R.K[2870.47]VYPSESR.Q	4YM7_2_RPA2	1	RPA2	KVYPSESR	120	126.127	19249.9	127.13	69121.3	20313.8	72341	3.56118	0.280806	-1.83236
				-141	27.6329	JL033021_040221_RPA2HFH_Q2_1to10_D.13689.13689.5	NP	4.74425	0.165452	1.74e-11	//11	15//191	3.689	0.62	K.LSVSVEQVSIAK[1230.66]PM[147.04]SNDGVSSAVER.K	4YM7_2_RPA2	1	RPA2	LSVSVEQVSIAKPMSNDGVSSAVER	106	//9	6//47	1.05525	0.8125	R.K[2870.47]VYPSESR.Q	4YM7_2_RPA2	1	RPA2	KVYPSESR	120	126.127	2173.96	127.13	14589.4	2238.93	15438.6	6.89551	0.145022	-2.78566
				-141	31.6669	JL033021_040221_RPA2HFH_Q2_1to5_D.13855.13855.5	P	4.74025	0.190299	3.48e-05	//11	14//191	3.91375	0.6	K.LSVSVEQVSIAK[1230.66]PM[147.04]SNDGVSSAVER.K	4YM7_2_RPA2	1	RPA2	LSVSVEQVSIAKPMSNDGVSSAVER	106	1//9	6//47	0.8265	0.625	R.K[2870.47]VYPSESR.Q	4YM7_2_RPA2	1	RPA2	KVYPSESR	120	126.127	4137.67	127.13	12652.8	4384.26	13187.1	3.00783	0.332466	-1.58872
				-142	28.6902	JL033021_040221_RPA2HFH_Q2_1to2_50B.12679.12679.4	P	4.71325	0.134653	0.632	//11	18//141	3.82625	0.84	K.LSVSVEQVSIAK[1230.66]PM[147.04]SNDGVSSAVER.K	4YM7_2_RPA2	1	RPA2	LSVSVEQVSIAKPMSNDGVSSAVER	106	//9	5//38	0.887	0.75	R.K[2870.47]VYPSESR.Q	4YM7_2_RPA2	1	RPA2	KVYPSESR	120	126.127	32602.3	127.13	51197.5	34939.8	51935.5	1.48643	0.672754	-0.571849
				-141	26.3851	JL033021_040221_RPA2HFH_Q2_10to1_50B.12899.12899.4	P	4.65625	0.153383	6.19e-09	//11	21//141	4.18625	0.9	K.LSVSVEQVSIAK[1230.66]PM[147.04]SNDGVSSAVER.K	4YM7_2_RPA2	1	RPA2	LSVSVEQVSIAKPMSNDGVSSAVER	106	//9	4//38	0.47	0.375	R.K[2870.47]VYPSESR.Q	4YM7_2_RPA2	1	RPA2	KVYPSESR	120	126.126	29360.2	127.13	7162.8	31781.9	5039.78	0.158574	6.30621	2.65677
				-142	31.654	JL033021_040221_RPA2HFH_Q2_1to5_100B.13128.13128.4	P	4.63325	0.131001	0.00349	//11	21//141	4.2495	1	K.LSVSVEQVSIAK[1230.66]PM[147.04]SNDGVSSAVER.K	4YM7_2_RPA2	1	RPA2	LSVSVEQVSIAKPMSNDGVSSAVER	106	//9	4//38	0.38375	0.375	R.K[2870.47]VYPSESR.Q	4YM7_2_RPA2	1	RPA2	KVYPSESR	120	126.127	8743.13	127.13	40264.9	9154.17	42362.2	4.62764	0.216093	-2.21028
				-141	33.8074	JL033021_040221_RPA2HFH_Q2_5to1_D.12458.12458.5	P	4.6255	0.198086	0.034	//11	18//191	4.2045	0.82	K.LSVSVEQVSIAK[1230.66]PM[147.04]SNDGVSSAVER.K	4YM7_2_RPA2	1	RPA2	LSVSVEQVSIAKPMSNDGVSSAVER	106	//9	4//47	0.421	0.375	R.K[2870.47]VYPSESR.Q	4YM7_2_RPA2	1	RPA2	KVYPSESR	120	126.127	16461.6	127.13	3563.8	17823.1	2341.1	0.131352	7.61313	2.92849
				-142	29.9545	JL033021_040221_RPA2HFH_Q2_1to5_50B.12480.12480.5	P	4.55425	0.175487	0.00216	//11	20//191	3.917	1	K.LSVSVEQVSIAK[1230.66]PM[147.04]SNDGVSSAVER.K	4YM7_2_RPA2	1	RPA2	LSVSVEQVSIAKPMSNDGVSSAVER	106	//9	6//47	0.63725	0.625	R.K[2870.47]VYPSESR.Q	4YM7_2_RPA2	1	RPA2	KVYPSESR	120	126.127	25561.6	127.13	106623	26853.5	111961	4.16932	0.239847	-2.05981
				-142	33.4945	JL033021_040221_RPA2HFH_Q2_1to5_D.13641.13641.5	P	4.27375	0.153865	7.08e-05	//11	16//191	3.7085	0.7	K.LSVSVEQVSIAK[1230.66]PM[147.04]SNDGVSSAVER.K	4YM7_2_RPA2	1	RPA2	LSVSVEQVSIAKPMSNDGVSSAVER	106	//9	5//47	0.56525	0.4375	R.K[2870.47]VYPSESR.Q	4YM7_2_RPA2	1	RPA2	KVYPSESR	120	126.127	3408.74	127.13	13221.4	3589.13	13861.8	3.86216	0.258922	-1.94941
				-141	27.5047	JL033021_040221_RPA2HFH_Q2_1to1_50B.12804.12804.4	P	4.1385	0.124577	6.68e-07	//11	21//141	3.51875	0.82	K.LSVSVEQVSIAK[1230.66]PM[147.04]SNDGVSSAVER.K	4YM7_2_RPA2	1	RPA2	LSVSVEQVSIAKPMSNDGVSSAVER	106	//9	5//38	0.61975	0.5625	R.K[2870.47]VYPSESR.Q	4YM7_2_RPA2	1	RPA2	KVYPSESR	120	126.127	21535.8	127.13	21477	23180.2	21081	0.909441	1.09958	0.136949
				-141	35.0423	JL033021_040221_RPA2HFH_Q2_2to1_D.13461.13461.5	P	4.05975	0.152282	0.0146	//11	16//191	3.623	0.66	K.LSVSVEQVSIAK[1230.66]PM[147.04]SNDGVSSAVER.K	4YM7_2_RPA2	1	RPA2	LSVSVEQVSIAKPMSNDGVSSAVER	106	//9	4//47	0.43675	0.375	R.K[2870.47]VYPSESR.Q	4YM7_2_RPA2	1	RPA2	KVYPSESR	120	126.127	17363.2	127.13	7654.74	18767.6	6643.94	0.354011	2.82477	1.49813
				-142	21.9086	JL033021_040221_RPA2HFH_Q2_2to1_1ug.12881.12881.5	P	4.05825	0.119101	0.263	//11	17//191	3.20975	0.66	K.LSVSVEQVSIAK[1230.66]PMSNDGVSSAVER.K	4YM7_2_RPA2	1	RPA2	LSVSVEQVSIAKPMSNDGVSSAVER	106	//9	8//47	0.8485	0.75	R.K[2854.47]VYPSESR.Q	4YM7_2_RPA2	1	RPA2	KVYPSESR	120	126.127	49735.9	127.13	24178.9	53740.4	21444.7	0.399043	2.506	1.32538
				-141	35.7374	JL033021_040221_RPA2HFH_Q2_1to10_100B.13040.13040.4	P	4.0245	0.121691	4.16e-06	//11	18//141	3.567	0.74	K.LSVSVEQVSIAK[1230.66]PM[147.04]SNDGVSSAVER.K	4YM7_2_RPA2	1	RPA2	LSVSVEQVSIAKPMSNDGVSSAVER	106	//9	4//38	0.4575	0.5	R.K[2870.47]VYPSESR.Q	4YM7_2_RPA2	1	RPA2	KVYPSESR	120	126.127	5473.16	127.13	39209.2	5616.56	41524.5	7.39323	0.135259	-2.8862
				-142	26.0558	JL033021_040221_RPA2HFH_Q2_10to1_1ug.12978.12978.4	P	3.991	0.110436	0.346	//11	16//141	3.64075	0.68	K.LSVSVEQVSIAK[1230.66]PM[147.04]SNDGVSSAVER.K	4YM7_2_RPA2	1	RPA2	LSVSVEQVSIAKPMSNDGVSSAVER	106	//9	3//38	0.35025	0.3125	R.K[2870.47]VYPSESR.Q	4YM7_2_RPA2	1	RPA2	KVYPSESR	120	126.127	47869.2	127.13	9336.7	51836.7	5707.68	0.110109	9.08192	3.183
				-141	29.1147	JL033021_040221_RPA2HFH_Q2_1to5_D.13969.13969.5	P	3.9175	0.160025	0.000166	//11	14//191	3.434	0.6	K.LSVSVEQVSIAK[1230.66]PM[147.04]SNDGVSSAVER.K	4YM7_2_RPA2	1	RPA2	LSVSVEQVSIAKPMSNDGVSSAVER	106	//9	3//47	0.4835	0.3125	R.K[2870.47]VYPSESR.Q	4YM7_2_RPA2	1	RPA2	KVYPSESR	120	126.127	3323.35	127.13	10372.9	3519.7	10817	3.07328	0.325385	-1.61978
				-143	32.6877	JL033021_040221_RPA2HFH_Q2_1to5_100B.13092.13092.5	P	3.90825	0.151459	0.123	//11	15//191	3.05175	0.62	K.LSVSVEQVSIAK[1230.66]PM[147.04]SNDGVSSAVER.K	4YM7_2_RPA2	1	RPA2	LSVSVEQVSIAKPMSNDGVSSAVER	106	//9	6//47	0.8565	0.8125	R.K[2870.47]VYPSESR.Q	4YM7_2_RPA2	1	RPA2	KVYPSESR	120	126.127	13095.1	127.13	45819.9	13828.6	47924.2	3.4656	0.288551	-1.7931
				-142	28.3903	JL033021_040221_RPA2HFH_Q2_1to5_100B.13100.13100.5	P	3.88975	0.156535	0.00212	//11	15//191	3.51725	0.62	K.LSVSVEQVSIAK[1230.66]PM[147.04]SNDGVSSAVER.K	4YM7_2_RPA2	1	RPA2	LSVSVEQVSIAKPMSNDGVSSAVER	106	//9	4//47	0.3725	0.375	R.K[2870.47]VYPSESR.Q	4YM7_2_RPA2	1	RPA2	KVYPSESR	120	126.127	15844.5	127.13	50014.5	16776.1	52172.2	3.10991	0.321552	-1.63687
				-141	27.6364	JL033021_040221_RPA2HFH_Q2_1to1_100B.13231.13231.4	P	3.86425	0.114381	6.93e-07	//11	16//141	3.54075	0.7	K.LSVSVEQVSIAK[1230.66]PM[147.04]SNDGVSSAVER.K	4YM7_2_RPA2	1	RPA2	LSVSVEQVSIAKPMSNDGVSSAVER	106	//9	3//38	0.3235	0.3125	R.K[2870.47]VYPSESR.Q	4YM7_2_RPA2	1	RPA2	KVYPSESR	120	126.127	21537.8	127.13	19632.6	23197.4	19104.5	0.823562	1.21424	0.280051
				-142	28.0316	JL033021_040221_RPA2HFH_Q2_1to2_D.12689.12689.4	P	3.83825	0.153208	1.75e-07	//11	17//141	3.27575	0.74	K.LSVSVEQVSIAK[1230.66]PM[147.04]SNDGVSSAVER.K	4YM7_2_RPA2	1	RPA2	LSVSVEQVSIAKPMSNDGVSSAVER	106	//9	4//38	0.5625	0.5	R.K[2870.47]VYPSESR.Q	4YM7_2_RPA2	1	RPA2	KVYPSESR	120	126.127	7226.38	127.13	12132.1	7738.11	12351.8	1.59623	0.626477	-0.674666
				-141	29.4441	JL033021_040221_RPA2HFH_Q2_1to5_D.13904.13904.5	P	3.73925	0.143671	0.0332	//11	13//191	3.18525	0.54	K.LSVSVEQVSIAK[1230.66]PM[147.04]SNDGVSSAVER.K	4YM7_2_RPA2	1	RPA2	LSVSVEQVSIAKPMSNDGVSSAVER	106	//9	4//47	0.554	0.375	R.K[2870.47]VYPSESR.Q	4YM7_2_RPA2	1	RPA2	KVYPSESR	120	126.127	3944.66	127.13	12765.8	4174.03	13325.5	3.19247	0.313237	-1.67467
				-142	34.4825	JL033021_040221_RPA2HFH_Q2_1to5_D.14075.14075.5	P	3.72175	0.139771	0.000386	//11	15//191	3.4925	0.64	K.LSVSVEQVSIAK[1230.66]PM[147.04]SNDGVSSAVER.K	4YM7_2_RPA2	1	RPA2	LSVSVEQVSIAKPMSNDGVSSAVER	106	//9	3//47	0.22925	0.1875	R.K[2870.47]VYPSESR.Q	4YM7_2_RPA2	1	RPA2	KVYPSESR	120	126.127	5086.11	127.13	14711.8	5396.07	15308.3	2.83694	0.352493	-1.50433
				-143	32.0291	JL033021_040221_RPA2HFH_Q2_1to5_D.13175.13175.5	P	3.7145	0.166753	0.0013	//11	13//191	3.24275	0.6	K.LSVSVEQVSIAK[1230.66]PM[147.04]SNDGVSSAVER.K	4YM7_2_RPA2	1	RPA2	LSVSVEQVSIAKPMSNDGVSSAVER	106	//9	4//47	0.47175	0.375	R.K[2870.47]VYPSESR.Q	4YM7_2_RPA2	1	RPA2	KVYPSESR	120	126.127	2514.36	127.13	10611.5	2640.44	11145.4	4.22103	0.236909	-2.07759
				-142	28.4726	JL033021_040221_RPA2HFH_Q2_10to1_50B.13077.13077.5	P	3.69225	0.14517	0.209	//11	14//191	3.35425	0.62	K.LSVSVEQVSIAK[1230.66]PM[147.04]SNDGVSSAVER.K	4YM7_2_RPA2	1	RPA2	LSVSVEQVSIAKPMSNDGVSSAVER	106	//9	3//47	0.338	0.3125	R.K[2870.47]VYPSESR.Q	4YM7_2_RPA2	1	RPA2	KVYPSESR	120	126.127	34832.9	127.13	6988.7	37718.4	4361.91	0.115644	8.64722	3.11224
				-141	26.3156	JL033021_040221_RPA2HFH_Q2_1to5_D.13930.13930.5	P	3.6475	0.160888	0.0303	//11	12//191	2.87525	0.44	K.LSVSVEQVSIAK[1230.66]PM[147.04]SNDGVSSAVER.K	4YM7_2_RPA2	1	RPA2	LSVSVEQVSIAKPMSNDGVSSAVER	106	//9	5//47	0.77225	0.5625	R.K[2870.47]VYPSESR.Q	4YM7_2_RPA2	1	RPA2	KVYPSESR	120	126.127	3136.66	127.13	13302.8	3293.41	13973.4	4.24284	0.235691	-2.08503
				-141	33.8933	JL033021_040221_RPA2HFH_Q2_1to2_100B.13108.13108.4	P	3.595	0.110212	0.00136	//11	18//141	3.2725	0.72	K.LSVSVEQVSIAK[1230.66]PM[147.04]SNDGVSSAVER.K	4YM7_2_RPA2	1	RPA2	LSVSVEQVSIAKPMSNDGVSSAVER	106	//9	3//38	0.3225	0.3125	R.K[2870.47]VYPSESR.Q	4YM7_2_RPA2	1	RPA2	KVYPSESR	120	126.127	17649.3	127.13	31032.1	18887.7	31669	1.6767	0.59641	-0.745623
				-141	26.5168	JL033021_040221_RPA2HFH_Q2_1to2_D.12989.12989.4	P	3.5595	0.145854	4.23e-12	//11	15//141	2.7885	0.56	K.LSVSVEQVSIAK[1230.66]PM[147.04]SNDGVSSAVER.K	4YM7_2_RPA2	1	RPA2	LSVSVEQVSIAKPMSNDGVSSAVER	106	//9	4//38	0.771	0.5	R.K[2870.47]VYPSESR.Q	4YM7_2_RPA2	1	RPA2	KVYPSESR	120	126.127	6965.76	127.13	12048.4	7456.16	12285.5	1.6477	0.606907	-0.720452
				-141	31.9174	JL033021_040221_RPA2HFH_Q2_1to1_50B.13006.13006.4	P	3.544	0.103499	2.04e-06	//11	17//141	3.1755	0.74	K.LSVSVEQVSIAK[1230.66]PM[147.04]SNDGVSSAVER.K	4YM7_2_RPA2	1	RPA2	LSVSVEQVSIAKPMSNDGVSSAVER	106	//9	3//38	0.3685	0.3125	R.K[2870.47]VYPSESR.Q	4YM7_2_RPA2	1	RPA2	KVYPSESR	120	126.127	20719	127.13	21825.1	22291.6	21527.4	0.965717	1.0355	0.0503278
				-141	32.7371	JL033021_040221_RPA2HFH_Q2_1to10_D.14123.14123.5	P	3.49125	0.150045	0.000401	//11	11//191	3.26875	0.5	K.LSVSVEQVSIAK[1230.66]PM[147.04]SNDGVSSAVER.K	4YM7_2_RPA2	1	RPA2	LSVSVEQVSIAKPMSNDGVSSAVER	106	//9	2//47	0.2225	0.125	R.K[2870.47]VYPSESR.Q	4YM7_2_RPA2	1	RPA2	KVYPSESR	120	126.127	2449.13	127.13	12173	2556.99	12824.5	5.01544	0.199384	-2.32638
				-141	32.4443	JL033021_040221_RPA2HFH_Q2_10to1_50B.13119.13119.4	P	3.42675	0.105422	0.000946	//11	15//141	3.08925	0.6	K.LSVSVEQVSIAK[1230.66]PM[147.04]SNDGVSSAVER.K	4YM7_2_RPA2	1	RPA2	LSVSVEQVSIAKPMSNDGVSSAVER	106	//9	3//38	0.3375	0.3125	R.K[2870.47]VYPSESR.Q	4YM7_2_RPA2	1	RPA2	KVYPSESR	120	126.127	22963	127.13	4980.87	24862.1	3275.96	0.131765	7.58927	2.92396
				-141	31.0612	JL033021_040221_RPA2HFH_Q2_1to2_D.12806.12806.4	P	3.342	0.129432	9.08e-14	//11	18//141	2.9645	0.76	K.LSVSVEQVSIAK[1230.66]PM[147.04]SNDGVSSAVER.K	4YM7_2_RPA2	1	RPA2	LSVSVEQVSIAKPMSNDGVSSAVER	106	//9	3//38	0.3775	0.3125	R.K[2870.47]VYPSESR.Q	4YM7_2_RPA2	1	RPA2	KVYPSESR	120	126.127	9820.24	127.13	15503.1	10523.7	15731.3	1.49485	0.668965	-0.579998
				-142	24.0799	JL033021_040221_RPA2HFH_Q2_2to1_D.12873.12873.4	P	3.26675	0.131878	1.79e-06	//11	16//141	2.62575	0.62	K.LSVSVEQVSIAK[1230.66]PM[147.04]SNDGVSSAVER.K	4YM7_2_RPA2	1	RPA2	LSVSVEQVSIAKPMSNDGVSSAVER	106	//9	4//38	0.641	0.5	R.K[2870.47]VYPSESR.Q	4YM7_2_RPA2	1	RPA2	KVYPSESR	120	126.127	18861	127.13	11105.2	20363.8	10206.9	0.501228	1.9951	0.996462
				-141	29.938	JL033021_040221_RPA2HFH_Q2_1to10_D.14002.14002.5	P	3.2175	0.115343	7.64e-14	//11	13//191	2.55725	0.42	K.LSVSVEQVSIAK[1230.66]PM[147.04]SNDGVSSAVER.K	4YM7_2_RPA2	1	RPA2	LSVSVEQVSIAKPMSNDGVSSAVER	106	//9	5//47	0.66025	0.4375	R.K[2870.47]VYPSESR.Q	4YM7_2_RPA2	1	RPA2	KVYPSESR	120	126.127	2883.11	127.13	14694.6	3007.13	15487.7	5.15031	0.194163	-2.36466
				-143	29.6123	JL033021_040221_RPA2HFH_Q2_1to1_100B.13211.13211.4	P	3.08825	0.100959	0.0198	//11	17//141	2.73525	0.7	K.LSVSVEQVSIAK[1230.66]PM[147.04]SNDGVSSAVER.K	4YM7_2_RPA2	1	RPA2	LSVSVEQVSIAKPMSNDGVSSAVER	106	//9	3//38	0.353	0.3125	R.K[2870.47]VYPSESR.Q	4YM7_2_RPA2	1	RPA2	KVYPSESR	120	126.127	16811.5	127.13	18133.9	18084.1	17922.8	0.991081	1.009	0.0129249
				-141	30.3496	JL033021_040221_RPA2HFH_Q2_1to2_D.13153.13153.5	P	2.96625	0.109904	1.69e-11	//11	12//191	2.458	0.4	K.LSVSVEQVSIAK[1230.66]PM[147.04]SNDGVSSAVER.K	4YM7_2_RPA2	1	RPA2	LSVSVEQVSIAKPMSNDGVSSAVER	106	//9	4//47	0.50825	0.375	R.K[2870.47]VYPSESR.Q	4YM7_2_RPA2	1	RPA2	KVYPSESR	120	126.127	7173.13	127.13	10977.2	7689.76	11119	1.44595	0.691589	-0.532013
				-142	29.7075	JL033021_040221_RPA2HFH_Q2_1to1_D.12896.12896.5	P	2.951	0.147591	0.00719	//11	12//191	2.34625	0.44	K.LSVSVEQVSIAK[1230.66]PM[147.04]SNDGVSSAVER.K	4YM7_2_RPA2	1	RPA2	LSVSVEQVSIAKPMSNDGVSSAVER	106	//9	5//47	0.60475	0.5625	R.K[2870.47]VYPSESR.Q	4YM7_2_RPA2	1	RPA2	KVYPSESR	120	126.126	5752.73	127.13	5434.24	6194.46	5306.79	0.8567	1.16727	0.223138
				-143	32.0291	JL033021_040221_RPA2HFH_Q2_1to5_D.14365.14365.5	P	2.94825	0.138823	0.0343	//11	11//191	2.36775	0.38	K.LSVSVEQVSIAK[1230.66]PM[147.04]SNDGVSSAVER.K	4YM7_2_RPA2	1	RPA2	LSVSVEQVSIAKPMSNDGVSSAVER	106	//9	4//47	0.5805	0.375	R.K[2870.47]VYPSESR.Q	4YM7_2_RPA2	1	RPA2	KVYPSESR	120	126.127	3600.37	127.13	10123.2	3822.15	10524.7	2.75359	0.363162	-1.46131
				-142	36.2113	JL033021_040221_RPA2HFH_Q2_1to2_D.13391.13391.5	P	2.93525	0.119674	7.44e-06	//11	11//191	2.38275	0.42	K.LSVSVEQVSIAK[1230.66]PM[147.04]SNDGVSSAVER.K	4YM7_2_RPA2	1	RPA2	LSVSVEQVSIAKPMSNDGVSSAVER	106	//9	4//47	0.5525	0.375	R.K[2870.47]VYPSESR.Q	4YM7_2_RPA2	1	RPA2	KVYPSESR	120	126.127	6487.55	127.13	10232.7	6952.32	10382.7	1.49342	0.669604	-0.578619
				-141	25.2654	JL033021_040221_RPA2HFH_Q2_5to1_50B.12967.12967.4	P	2.9165	0.0862768	4.22e-05	//11	16//141	2.622	0.66	K.LSVSVEQVSIAK[1230.66]PM[147.04]SNDGVSSAVER.K	4YM7_2_RPA2	1	RPA2	LSVSVEQVSIAKPMSNDGVSSAVER	106	//9	3//38	0.2945	0.3125	R.K[2870.47]VYPSESR.Q	4YM7_2_RPA2	1	RPA2	KVYPSESR	120	126.127	32642.4	127.13	9837.87	35319.7	7611.67	0.215508	4.6402	2.21419
				-141	30.185	JL033021_040221_RPA2HFH_Q2_1to10_D.13101.13101.5	P	2.9045	0.120379	8.65e-08	//11	12//191	2.45375	0.38	K.LSVSVEQVSIAK[1230.66]PM[147.04]SNDGVSSAVER.K	4YM7_2_RPA2	1	RPA2	LSVSVEQVSIAKPMSNDGVSSAVER	106	//9	4//47	0.45075	0.375	R.K[2870.47]VYPSESR.Q	4YM7_2_RPA2	1	RPA2	KVYPSESR	120	126.127	1420.6	127.13	11539.1	1446.75	12237.6	8.4587	0.118221	-3.08044
				-144	35.7503	JL033021_040221_RPA2HFH_Q2_1to5_100B.13293.13293.5	P	2.83625	0.11208	0.404	//11	13//191	2.4775	0.48	K.LSVSVEQVSIAK[1230.66]PM[147.04]SNDGVSSAVER.K	4YM7_2_RPA2	1	RPA2	LSVSVEQVSIAKPMSNDGVSSAVER	106	//9	4//47	0.35875	0.375	R.K[2870.47]VYPSESR.Q	4YM7_2_RPA2	1	RPA2	KVYPSESR	120	126.127	11984.3	127.13	42569.4	12650.4	44540.7	3.52089	0.284019	-1.81594
				-141	25.0807	JL033021_040221_RPA2HFH_Q2_1to1_D.13043.13043.5	P	2.8345	0.136435	0.0948	//11	12//191	2.5315	0.44	K.LSVSVEQVSIAK[1230.66]PM[147.04]SNDGVSSAVER.K	4YM7_2_RPA2	1	RPA2	LSVSVEQVSIAKPMSNDGVSSAVER	106	//9	3//47	0.303	0.1875	R.K[2870.47]VYPSESR.Q	4YM7_2_RPA2	1	RPA2	KVYPSESR	120	126.127	4972.37	127.13	5339.92	5348.95	5275.78	0.986321	1.01387	0.0198715
				-141	28.1175	JL033021_040221_RPA2HFH_Q2_1to10_50B.12635.12635.3	P	2.80575	0.0959116	0.00626	//11	11//91	1.98025	0.36	K.LSVSVEQVSIAK[1230.66]PM[147.04]SNDGVSSAVER.K	4YM7_2_RPA2	1	RPA2	LSVSVEQVSIAKPMSNDGVSSAVER	106	//9	4//29	0.8255	0.5	R.K[2870.47]VYPSESR.Q	4YM7_2_RPA2	1	RPA2	KVYPSESR	120	126.127	19415.4	127.13	128582	20009.6	136043	6.79888	0.147083	-2.7653
				-142	29.3488	JL033021_040221_RPA2HFH_Q2_1to5_100B.13105.13105.4	P	2.74075	0.0876045	0.665	//11	15//141	2.352	0.48	K.LSVSVEQVSIAK[1230.66]PM[147.04]SNDGVSSAVER.K	4YM7_2_RPA2	1	RPA2	LSVSVEQVSIAKPMSNDGVSSAVER	106	//9	4//38	0.38875	0.375	R.K[2870.47]VYPSESR.Q	4YM7_2_RPA2	1	RPA2	KVYPSESR	120	126.127	6625.31	127.13	29968.3	6941.2	31518.7	4.54081	0.220225	-2.18295
				-141	24.2116	JL033021_040221_RPA2HFH_Q2_10to1_50B.12888.12888.4	P	2.7315	0.0922025	0.000191	//11	16//141	2.043	0.44	K.LSVSVEQVSIAK[1230.66]PM[147.04]SNDGVSSAVER.K	4YM7_2_RPA2	1	RPA2	LSVSVEQVSIAKPMSNDGVSSAVER	106	//9	4//38	0.6885	0.5	R.K[2870.47]VYPSESR.Q	4YM7_2_RPA2	1	RPA2	KVYPSESR	120	126.127	25611.2	127.13	4536.88	27737.6	2562.45	0.0923817	10.8247	3.43625
				-141	35.2105	JL033021_040221_RPA2HFH_Q2_1to5_D.13483.13483.4	P	2.7085	0.121463	1.36e-06	//11	12//141	1.9065	0.34	K.LSVSVEQVSIAK[1230.66]PM[147.04]SNDGVSSAVER.K	4YM7_2_RPA2	1	RPA2	LSVSVEQVSIAKPMSNDGVSSAVER	106	//9	4//38	0.802	0.5	R.K[2870.47]VYPSESR.Q	4YM7_2_RPA2	1	RPA2	KVYPSESR	120	126.127	2283.41	127.13	10440.7	2391.36	10983.1	4.59282	0.217731	-2.19938
				-141	30.3368	JL033021_040221_RPA2HFH_Q2_1to5_D.13277.13277.4	P	2.6885	0.116342	9.35e-11	//11	12//141	1.8665	0.34	K.LSVSVEQVSIAK[1230.66]PM[147.04]SNDGVSSAVER.K	4YM7_2_RPA2	1	RPA2	LSVSVEQVSIAKPMSNDGVSSAVER	106	//9	4//38	0.822	0.5	R.K[2870.47]VYPSESR.Q	4YM7_2_RPA2	1	RPA2	KVYPSESR	120	126.127	4179.81	127.13	15062.9	4410.36	15765.9	3.57475	0.27974	-1.83784
				-141	32.4902	JL033021_040221_RPA2HFH_Q2_1to10_D.13947.13947.5	P	2.6315	0.0980221	2.83e-06	//11	12//191	2.231	0.38	K.LSVSVEQVSIAK[1230.66]PM[147.04]SNDGVSSAVER.K	4YM7_2_RPA2	1	RPA2	LSVSVEQVSIAKPMSNDGVSSAVER	106	//9	3//47	0.4005	0.3125	R.K[2870.47]VYPSESR.Q	4YM7_2_RPA2	1	RPA2	KVYPSESR	120	126.126	3063.74	127.13	14422.2	3205.23	15179.5	4.73585	0.211155	-2.24362
				-141	30.7613	JL033021_040221_RPA2HFH_Q2_1to5_D.14273.14273.5	P	2.59125	0.104463	0.318	//11	12//191	2.2495	0.38	K.LSVSVEQVSIAK[1230.66]PM[147.04]SNDGVSSAVER.K	4YM7_2_RPA2	1	RPA2	LSVSVEQVSIAKPMSNDGVSSAVER	106	//9	3//47	0.34175	0.3125	R.K[2870.47]VYPSESR.Q	4YM7_2_RPA2	1	RPA2	KVYPSESR	120	126.127	3291.08	127.13	11015.1	3479.49	11508.2	3.30743	0.302349	-1.72571
				-142	30.7777	JL033021_040221_RPA2HFH_Q2_1to10_D.13108.13108.5	P	2.56075	0.112107	2.12e-05	//11	12//191	2.118	0.44	K.LSVSVEQVSIAK[1230.66]PM[147.04]SNDGVSSAVER.K	4YM7_2_RPA2	1	RPA2	LSVSVEQVSIAKPMSNDGVSSAVER	106	//9	3//47	0.44275	0.3125	R.K[2870.47]VYPSESR.Q	4YM7_2_RPA2	1	RPA2	KVYPSESR	120	126.127	2200.89	127.13	9696.34	2307.93	10192.8	4.41644	0.226427	-2.14288
				-141	27.4682	JL033021_040221_RPA2HFH_Q2_10to1_D.12794.12794.5	P	2.4365	0.106705	0.00607	//11	11//191	1.82125	0.32	K.LSVSVEQVSIAK[1230.66]PM[147.04]SNDGVSSAVER.K	4YM7_2_RPA2	1	RPA2	LSVSVEQVSIAKPMSNDGVSSAVER	106	//9	5//47	0.61525	0.5625	R.K[2870.47]VYPSESR.Q	4YM7_2_RPA2	1	RPA2	KVYPSESR	120	126.127	10108.8	127.131	2274.22	10944.1	1529.53	0.139757	7.15526	2.839
				-142	38.8988	JL033021_040221_RPA2HFH_Q2_1to10_100B.13183.13183.4	P	2.35725	0.0789302	0.143	//11	12//141	1.78625	0.28	K.LSVSVEQVSIAK[1230.66]PM[147.04]SNDGVSSAVER.K	4YM7_2_RPA2	1	RPA2	LSVSVEQVSIAKPMSNDGVSSAVER	106	//9	4//38	0.571	0.5	R.K[2870.47]VYPSESR.Q	4YM7_2_RPA2	1	RPA2	KVYPSESR	120	126.127	6681.14	127.13	35586	6956.05	37533.5	5.39581	0.185329	-2.43184
				-141	27.5047	JL033021_040221_RPA2HFH_Q2_5to1_50B.12962.12962.4	P	2.353	0.0664323	0.104	//11	12//141	2.09675	0.5	K.LSVSVEQVSIAK[1230.66]PM[147.04]SNDGVSSAVER.K	4YM7_2_RPA2	1	RPA2	LSVSVEQVSIAKPMSNDGVSSAVER	106	//9	3//38	0.25625	0.3125	R.K[2870.47]VYPSESR.Q	4YM7_2_RPA2	1	RPA2	KVYPSESR	120	126.127	32809.3	127.13	8869.55	35508.6	6559.06	0.184718	5.41367	2.43661
				-141	31.0083	JL033021_040221_RPA2HFH_Q2_1to1_D.12860.12860.5	P	2.31075	0.125554	0.00263	//11	11//191	2.062	0.42	K.LSVSVEQVSIAK[1230.66]PM[147.04]SNDGVSSAVER.K	4YM7_2_RPA2	1	RPA2	LSVSVEQVSIAKPMSNDGVSSAVER	106	//9	2//47	0.24875	0.125	R.K[2870.47]VYPSESR.Q	4YM7_2_RPA2	1	RPA2	KVYPSESR	120	126.126	4782.8	127.13	5038.58	5145.82	4969.88	0.96581	1.0354	0.0501885
				-141	21.182	JL033021_040221_RPA2HFH_Q2_10to1_100B.13327.13327.4	P	2.25425	0.0712063	0.537	//11	15//141	2.01775	0.42	K.LSVSVEQVSIAK[1230.66]PM[147.04]SNDGVSSAVER.K	4YM7_2_RPA2	1	RPA2	LSVSVEQVSIAKPMSNDGVSSAVER	106	//9	2//38	0.2365	0.25	R.K[2870.47]VYPSESR.Q	4YM7_2_RPA2	1	RPA2	KVYPSESR	120	126.127	28389.8	127.13	4883.01	30748.2	2683.9	0.0872865	11.4565	3.5181
				-141	28.0316	JL033021_040221_RPA2HFH_Q2_2to1_D.13058.13058.4	P	2.24825	0.0921697	0.519	//11	14//141	1.89325	0.36	K.LSVSVEQVSIAK[1230.66]PM[147.04]SNDGVSSAVER.K	4YM7_2_RPA2	1	RPA2	LSVSVEQVSIAKPMSNDGVSSAVER	106	//9	3//38	0.355	0.3125	R.K[2870.47]VYPSESR.Q	4YM7_2_RPA2	1	RPA2	KVYPSESR	120	126.127	12868.6	127.13	7565.93	13894	6952.26	0.500378	1.99849	0.998909
				-141	30.0075	JL033021_040221_RPA2HFH_Q2_1to5_D.13454.13454.4	P	2.15175	0.0988016	7.75e-07	//11	12//141	1.78175	0.32	K.LSVSVEQVSIAK[1230.66]PM[147.04]SNDGVSSAVER.K	4YM7_2_RPA2	1	RPA2	LSVSVEQVSIAKPMSNDGVSSAVER	106	//9	2//38	0.37	0.25	R.K[2870.47]VYPSESR.Q	4YM7_2_RPA2	1	RPA2	KVYPSESR	120	126.127	4414.43	127.13	10893.2	4698.72	11276.7	2.39995	0.416675	-1.26301
				-141	31.7199	JL033021_040221_RPA2HFH_Q2_2to1_D.12666.12666.4	P	2.134	0.0810021	1.02e-06	//11	13//141	1.66475	0.3	K.LSVSVEQVSIAK[1230.66]PM[147.04]SNDGVSSAVER.K	4YM7_2_RPA2	1	RPA2	LSVSVEQVSIAKPMSNDGVSSAVER	106	//9	3//38	0.46925	0.3125	R.K[2870.47]VYPSESR.Q	4YM7_2_RPA2	1	RPA2	KVYPSESR	120	126.127	15882.9	127.13	7658.22	17162.3	6780.56	0.395085	2.5311	1.33976
				-141	33.4981	JL033021_040221_RPA2HFH_Q2_1to5_D.13815.13815.4	P	2.0305	0.114909	1.25e-07	//11	11//141	1.6845	0.3	K.LSVSVEQVSIAK[1230.66]PM[147.04]SNDGVSSAVER.K	4YM7_2_RPA2	1	RPA2	LSVSVEQVSIAKPMSNDGVSSAVER	106	//9	2//38	0.346	0.25	R.K[2870.47]VYPSESR.Q	4YM7_2_RPA2	1	RPA2	KVYPSESR	120	126.127	2077.35	127.13	9923.01	2172.12	10446.8	4.80952	0.207921	-2.26589
				-141	30.5344	JL033021_040221_RPA2HFH_Q2_1to10_D.13267.13267.4	P	1.6555	0.0779976	5.53e-06	//11	12//141	1.4325	0.32	K.LSVSVEQVSIAK[1230.66]PM[147.04]SNDGVSSAVER.K	4YM7_2_RPA2	1	RPA2	LSVSVEQVSIAKPMSNDGVSSAVER	106	//9	2//38	0.223	0.25	R.K[2870.47]VYPSESR.Q	4YM7_2_RPA2	1	RPA2	KVYPSESR	120	126.127	1627.38	127.13	10393.9	1680.3	10991.9	6.54159	0.152868	-2.70964
				-142	34.3543	JL033021_040221_RPA2HFH_Q2_1to2_D.13104.13104.4	P	1.6285	0.0761854	0.0977	//11	10//141	1.3155	0.2	K.LSVSVEQVSIAK[1230.66]PM[147.04]SNDGVSSAVER.K	4YM7_2_RPA2	1	RPA2	LSVSVEQVSIAKPMSNDGVSSAVER	106	//9	2//38	0.313	0.25	R.K[2870.47]VYPSESR.Q	4YM7_2_RPA2	1	RPA2	KVYPSESR	120	126.127	3820.61	127.13	7267.19	4084.23	7444.4	1.82272	0.548631	-0.866092
				-142	32.6419	JL033021_040221_RPA2HFH_Q2_1to10_D.13370.13370.4	P	1.62375	0.0809527	2.95e-08	//11	9//141	1.41625	0.28	K.LSVSVEQVSIAK[1230.66]PM[147.04]SNDGVSSAVER.K	4YM7_2_RPA2	1	RPA2	LSVSVEQVSIAKPMSNDGVSSAVER	106	//9	2//38	0.2075	0.125	R.K[2870.47]VYPSESR.Q	4YM7_2_RPA2	1	RPA2	KVYPSESR	120	126.127	1550.87	127.13	8251.34	1614.76	8702.76	5.38952	0.185545	-2.43016
				-141	29.8757	JL033021_040221_RPA2HFH_Q2_5to1_D.12467.12467.4	P	1.579	0.070458	0.167	//11	10//141	1.3075	0.2	K.LSVSVEQVSIAK[1230.66]PM[147.04]SNDGVSSAVER.K	4YM7_2_RPA2	1	RPA2	LSVSVEQVSIAKPMSNDGVSSAVER	106	//9	2//38	0.2715	0.25	R.K[2870.47]VYPSESR.Q	4YM7_2_RPA2	1	RPA2	KVYPSESR	120	126.127	9131.85	127.13	2618.28	9881.92	1985.91	0.200964	4.97602	2.31499
				-141	30.8436	JL033021_040221_RPA2HFH_Q2_1to10_D.13083.13083.5	P	1.566	0.0779221	0.667	//11	9//191	1.42475	0.28	K.LSVSVEQVSIAK[1230.66]PM[147.04]SNDGVSSAVER.K	4YM7_2_RPA2	1	RPA2	LSVSVEQVSIAKPMSNDGVSSAVER	106	//9	2//47	0.14125	0.125	R.K[2870.47]VYPSESR.Q	4YM7_2_RPA2	1	RPA2	KVYPSESR	120	126.127	953.69	127.13	10138.9	951.782	10779.1	11.3252	0.088299	-3.50146
				-141	35.5398	JL033021_040221_RPA2HFH_Q2_1to10_D.13631.13631.4	P	1.554	0.075457	3.92e-09	//11	9//141	1.2335	0.18	K.LSVSVEQVSIAK[1230.66]PM[147.04]SNDGVSSAVER.K	4YM7_2_RPA2	1	RPA2	LSVSVEQVSIAKPMSNDGVSSAVER	106	//9	2//38	0.3205	0.25	R.K[2870.47]VYPSESR.Q	4YM7_2_RPA2	1	RPA2	KVYPSESR	120	126.126	1292.83	127.13	11650.8	1307.27	12368.7	9.46149	0.105692	-3.24207
				-142	30.4026	JL033021_040221_RPA2HFH_Q2_1to5_D.14029.14029.4	P	1.528	0.0827893	0.00478	//11	9//141	1.169	0.22	K.LSVSVEQVSIAK[1230.66]PM[147.04]SNDGVSSAVER.K	4YM7_2_RPA2	1	RPA2	LSVSVEQVSIAKPMSNDGVSSAVER	106	//9	3//38	0.359	0.3125	R.K[2870.47]VYPSESR.Q	4YM7_2_RPA2	1	RPA2	KVYPSESR	120	126.127	1973.27	127.13	9258.52	2064.64	9744.12	4.71952	0.211886	-2.23864
				-141	30.6002	JL033021_040221_RPA2HFH_Q2_1to10_D.13455.13455.4	P	1.45675	0.0730548	7.84e-05	//11	7//141	1.03725	0.14	K.LSVSVEQVSIAK[1230.66]PM[147.04]SNDGVSSAVER.K	4YM7_2_RPA2	1	RPA2	LSVSVEQVSIAKPMSNDGVSSAVER	106	//9	3//38	0.4195	0.3125	R.K[2870.47]VYPSESR.Q	4YM7_2_RPA2	1	RPA2	KVYPSESR	120	126.127	1678.05	127.13	9799.17	1740.1	10350	5.94793	0.168126	-2.57239
				-141	33.564	JL033021_040221_RPA2HFH_Q2_1to2_D.13355.13355.4	P	1.42675	0.0933829	0.116	//11	8//141	1.09625	0.16	K.LSVSVEQVSIAK[1230.66]PM[147.04]SNDGVSSAVER.K	4YM7_2_RPA2	1	RPA2	LSVSVEQVSIAKPMSNDGVSSAVER	106	//9	2//38	0.3305	0.25	R.K[2870.47]VYPSESR.Q	4YM7_2_RPA2	1	RPA2	KVYPSESR	120	126.127	4809.93	127.13	7032.2	5159.02	7103.78	1.37696	0.726237	-0.461488
				-143	34.005	JL033021_040221_RPA2HFH_Q2_10to1_100B.13438.13438.5	P	1.372	0.0538134	0.337	//11	10//191	1.1195	0.28	K.LSVSVEQVSIAK[1230.66]PM[147.04]SNDGVSSAVER.K	4YM7_2_RPA2	1	RPA2	LSVSVEQVSIAKPMSNDGVSSAVER	106	//9	3//47	0.2525	0.3125	R.K[2870.47]VYPSESR.Q	4YM7_2_RPA2	1	RPA2	KVYPSESR	120	126.127	39953.4	127.131	7507.87	43267.1	4458.57	0.103048	9.70426	3.27862
				-142	31.9833	JL033021_040221_RPA2HFH_Q2_1to10_D.13820.13820.4	P	1.37	0.0780671	0.00144	//11	9//141	1.0855	0.18	K.LSVSVEQVSIAK[1230.66]PM[147.04]SNDGVSSAVER.K	4YM7_2_RPA2	1	RPA2	LSVSVEQVSIAKPMSNDGVSSAVER	106	//9	2//38	0.2845	0.25	R.K[2870.47]VYPSESR.Q	4YM7_2_RPA2	1	RPA2	KVYPSESR	120	126.127	2128.38	127.13	8683.78	2237.53	9114.31	4.07338	0.245496	-2.02623
				-142	32.3126	JL033021_040221_RPA2HFH_Q2_1to2_D.13281.13281.4	P	1.318	0.0748821	0.275	//11	7//141	0.935	0.14	K.LSVSVEQVSIAK[1230.66]PM[147.04]SNDGVSSAVER.K	4YM7_2_RPA2	1	RPA2	LSVSVEQVSIAKPMSNDGVSSAVER	106	//9	2//38	0.383	0.25	R.K[2870.47]VYPSESR.Q	4YM7_2_RPA2	1	RPA2	KVYPSESR	120	126.127	3693.43	127.13	6352.69	3953.74	6475.86	1.63791	0.610535	-0.711854
				-141	21.182	JL033021_040221_RPA2HFH_Q2_10to1_100B.13329.13329.4	P	1.31525	0.0413568	0.482	//11	9//141	1.07475	0.18	K.LSVSVEQVSIAK[1230.66]PM[147.04]SNDGVSSAVER.K	4YM7_2_RPA2	1	RPA2	LSVSVEQVSIAKPMSNDGVSSAVER	106	//9	2//38	0.2405	0.25	R.K[2870.47]VYPSESR.Q	4YM7_2_RPA2	1	RPA2	KVYPSESR	120	126.127	28421.1	127.13	4777.3	30783	2567.82	0.0834169	11.988	3.58352
				-141	29.283	JL033021_040221_RPA2HFH_Q2_1to5_D.14176.14176.4	P	1.28775	0.0857385	0.319	//11	8//141	0.95575	0.16	K.LSVSVEQVSIAK[1230.66]PM[147.04]SNDGVSSAVER.K	4YM7_2_RPA2	1	RPA2	LSVSVEQVSIAKPMSNDGVSSAVER	106	//9	2//38	0.332	0.25	R.K[2870.47]VYPSESR.Q	4YM7_2_RPA2	1	RPA2	KVYPSESR	120	126.127	2734.52	127.13	7744.09	2902.52	8052.94	2.77446	0.36043	-1.47221
				-141	30.0733	JL033021_040221_RPA2HFH_Q2_1to10_D.13648.13648.4	P	1.24725	0.0676475	8.02e-09	//11	7//141	1.11175	0.14	K.LSVSVEQVSIAK[1230.66]PM[147.04]SNDGVSSAVER.K	4YM7_2_RPA2	1	RPA2	LSVSVEQVSIAKPMSNDGVSSAVER	106	//9	2//38	0.1355	0.125	R.K[2870.47]VYPSESR.Q	4YM7_2_RPA2	1	RPA2	KVYPSESR	120	126.127	1252.68	127.13	9413.39	1281.93	9974.76	7.78102	0.128518	-2.95996
				-141	29.4147	JL033021_040221_RPA2HFH_Q2_1to2_D.13174.13174.4	P	1.20425	0.0593168	0.00596	//11	7//141	0.79225	0.14	K.LSVSVEQVSIAK[1230.66]PM[147.04]SNDGVSSAVER.K	4YM7_2_RPA2	1	RPA2	LSVSVEQVSIAKPMSNDGVSSAVER	106	//9	3//38	0.412	0.3125	R.K[2870.47]VYPSESR.Q	4YM7_2_RPA2	1	RPA2	KVYPSESR	120	126.127	4498.35	127.13	8219.69	4811.47	8404.24	1.74671	0.572505	-0.804641
				-141	28.4926	JL033021_040221_RPA2HFH_Q2_1to5_D.13858.13858.4	P	1.1065	0.05498	0.00586	//11	6//141	0.807	0.12	K.LSVSVEQVSIAK[1230.66]PM[147.04]SNDGVSSAVER.K	4YM7_2_RPA2	1	RPA2	LSVSVEQVSIAKPMSNDGVSSAVER	106	//9	2//38	0.2995	0.25	R.K[2870.47]VYPSESR.Q	4YM7_2_RPA2	1	RPA2	KVYPSESR	120	126.127	2317.21	127.131	7806.61	2449.45	8157.39	3.3303	0.300274	-1.73565
				-141	26.912	JL033021_040221_RPA2HFH_Q2_10to1_D.12754.12754.4	P	1.05175	0.0547601	0.0952	//11	7//141	0.83525	0.14	K.LSVSVEQVSIAK[1230.66]PM[147.04]SNDGVSSAVER.K	4YM7_2_RPA2	1	RPA2	LSVSVEQVSIAKPMSNDGVSSAVER	106	//9	2//38	0.2165	0.25	R.K[2870.47]VYPSESR.Q	4YM7_2_RPA2	1	RPA2	KVYPSESR	120	126.127	6934.56	127.13	1178.43	7510.73	640.245	0.0852441	11.731	3.55226
				-142	27.5047	JL033021_040221_RPA2HFH_Q2_1to10_D.13832.13832.4	P	1.02625	0.0669657	0.00041	//11	5//141	0.68925	0.1	K.LSVSVEQVSIAK[1230.66]PM[147.04]SNDGVSSAVER.K	4YM7_2_RPA2	1	RPA2	LSVSVEQVSIAKPMSNDGVSSAVER	106	//9	2//38	0.337	0.25	R.K[2870.47]VYPSESR.Q	4YM7_2_RPA2	1	RPA2	KVYPSESR	120	126.127	1016.34	127.13	9474.24	1025.13	10061.2	9.81451	0.10189	-3.29492
				-141	27.834	JL033021_040221_RPA2HFH_Q2_1to5_D.13996.13996.4	P	0.97825	0.0521608	0.0172	//11	6//141	0.68025	0.12	K.LSVSVEQVSIAK[1230.66]PM[147.04]SNDGVSSAVER.K	4YM7_2_RPA2	1	RPA2	LSVSVEQVSIAKPMSNDGVSSAVER	106	//9	2//38	0.298	0.25	R.K[2870.47]VYPSESR.Q	4YM7_2_RPA2	1	RPA2	KVYPSESR	120	126.127	2192.6	127.13	6840.55	2322.17	7133.37	3.07186	0.325536	-1.61911
				-143	29.2171	JL033021_040221_RPA2HFH_Q2_1to5_D.14237.14237.4	P	0.8745	0.0629159	0.571	//11	5//141	0.552	0.1	K.LSVSVEQVSIAK[1230.66]PM[147.04]SNDGVSSAVER.K	4YM7_2_RPA2	1	RPA2	LSVSVEQVSIAKPMSNDGVSSAVER	106	//9	2//38	0.3225	0.25	R.K[2870.47]VYPSESR.Q	4YM7_2_RPA2	1	RPA2	KVYPSESR	120	126.127	2097.28	127.13	7504.98	2213.4	7853.92	3.54835	0.281821	-1.82715
				-142	26.912	JL033021_040221_RPA2HFH_Q2_1to5_D.13638.13638.4	P	0.86875	0.0507447	0.121	//11	3//141	0.50975	0.06	K.LSVSVEQVSIAK[1230.66]PM[147.04]SNDGVSSAVER.K	4YM7_2_RPA2	1	RPA2	LSVSVEQVSIAKPMSNDGVSSAVER	106	//9	2//38	0.359	0.25	R.K[2870.47]VYPSESR.Q	4YM7_2_RPA2	1	RPA2	KVYPSESR	120	126.127	2083.08	127.13	8347.56	2191.14	8758.09	3.99705	0.250185	-1.99893
				-141	26.6485	JL033021_040221_RPA2HFH_Q2_1to1_D.12856.12856.4	P	0.8005	0.0620014	0.0465	//11	5//141	0.758	0.1	K.LSVSVEQVSIAK[1230.66]PM[147.04]SNDGVSSAVER.K	4YM7_2_RPA2	1	RPA2	LSVSVEQVSIAKPMSNDGVSSAVER	106	//9	1//38	0.0425	0.0625	R.K[2870.47]VYPSESR.Q	4YM7_2_RPA2	1	RPA2	KVYPSESR	120	126.127	2780.84	127.13	2609.93	2994.51	2547.1	0.850592	1.17565	0.23346
				-142	34.8812	JL033021_040221_RPA2HFH_Q2_1to5_D.13661.13661.4	P	0.745	0.0442465	0.0164	//11	5//141	0.745	0.1	K.LSVSVEQVSIAK[1230.66]PM[147.04]SNDGVSSAVER.K	4YM7_2_RPA2	1	RPA2	LSVSVEQVSIAKPMSNDGVSSAVER	106	//9	//38	0	0	R.K[2870.47]VYPSESR.Q	4YM7_2_RPA2	1	RPA2	KVYPSESR	120	126.127	2234.31	127.13	6629.27	2369.12	6903.23	2.91383	0.343191	-1.54292
	21	RPA2:106---RPA2:1140	7.12175
				-142	17.6459	JL033021_040221_RPA2HFH_Q2_10to1_50B.12965.12965.5	P	7.12175	0.224973	0.284	//11	23//191	7.0655	1.36	K.LSVSVEQVSIAK[1457.85]PM[147.04]SNDGVSSAVER.K	4YM7_2_RPA2	1	RPA2	LSVSVEQVSIAKPMSNDGVSSAVER	106	//12	2//63	0.05625	0.1	R.FEDAKK[2870.47]LLTK.S	4YM7_2_RPA2	1	RPA2	FEDAKKLLTK	1140	126.126	63585.4	127.129	10965.6	68867.2	6042.27	0.0877381	11.3976	3.51065
	22	RPA2:106---RPA2:443	3.37025
				-141	23.2042	JL033021_040221_RPA2HFH_Q2_1to1_50B.12918.12918.5	P	3.37025	0.100275	0.178	//11	17//191	3.31	0.68	K.LSVSVEQVSIAK[1444.79]PM[147.04]SNDGVSSAVER.K	4YM7_2_RPA2	1	RPA2	LSVSVEQVSIAKPMSNDGVSSAVER	106	//12	1//62	0.06025	0.05	R.GMAINFKDK[2870.47]R.Y	4YM7_2_RPA2	1	RPA2	GMAINFKDKR	443	126.127	29540.3	127.13	27178.1	31814.5	26471.7	0.832063	1.20183	0.265235
	23	RPA2:106---RPA2:916	7.24025
				-144	31.0065	JL033021_040221_RPA2HFH_Q2_10to1_50B.12949.12949.5	P	7.24025	0.215176	0.573	//11	25//191	6.7895	1.24	K.LSVSVEQVSIAK[1500.79]PM[147.04]SNDGVSSAVER.K	4YM7_2_RPA2	1	RPA2	LSVSVEQVSIAKPMSNDGVSSAVER	106	//13	4//71	0.45075	0.272727	R.TPQIGDK[2870.47]FSSR.H	4YM7_2_RPA2	1	RPA2	TPQIGDKFSSR	916	126.127	39464.2	127.13	7131.67	42739.7	4099.36	0.0959145	10.4259	3.38211
	24	RPA2:1061---RPA2:916	1.10725
				-141	28.6098	JL033021_040221_RPA2HFH_Q2_1to2_50B.11612.11612.5	P	1.10725	0.0351782	0.0265	//18	7//121	0.404	0.34375	R.STGPVNSLTM[147.04]QPVK[1500.79]GR.K	4YM7_2_RPA2	1	RPA2	STGPVNSLTMQPVKGR	1061	//13	7//71	0.70325	0.5	R.TPQIGDK[1953.04]FSSR.H	4YM7_2_RPA2	1	RPA2	TPQIGDKFSSR	916	126.127	57326.6	127.13	93330	61409.9	94864.4	1.54477	0.647344	-0.627396
				-141	36.2902	JL033021_040221_RPA2HFH_Q2_2to1_1ug.11999.11999.5	P	0.70175	0.021783	0.0377	//18	4//121	0.141	0.125	R.STGPVNSLTM[147.04]QPVK[1500.79]GR.K	4YM7_2_RPA2	1	RPA2	STGPVNSLTMQPVKGR	1061	//13	7//71	0.56075	0.409091	R.TPQIGDK[1953.04]FSSR.H	4YM7_2_RPA2	1	RPA2	TPQIGDKFSSR	916	126.127	67343.6	127.13	33154.7	72762.4	29482.4	0.405187	2.468	1.30334
				-141	32.7139	JL033021_040221_RPA2HFH_Q2_1to1_50B.11432.11432.5	P	0.5025	0.0164251	0.154	//18	6//120	0.36775	0.25	R.STGPVNSLTM[147.04]QPVK[1656.89]GR.K	4YM7_2_RPA2	1	RPA2	STGPVNSLTMQPVKGR	1061	//14	4//83	0.13475	0.166667	R.RTPQIGDK[1953.04]FSSR.H	4YM7_2_RPA2	1	RPA2	RTPQIGDKFSSR	916	126.127	65900.1	127.13	78645.1	70827	78358.6	1.10634	0.903883	-0.145791
	25	RPA2:1061---RPA2:808	3.97
				0	1.19043	JL033021_040221_RPA2HFH_Q2_10to1_50B.12351.12351.5	N	3.97	0.152335		//12	6//53	2.101	1.11111	K.TEK[2094.14]VDLALNR.N	4YM7_2_RPA2	1	RPA2	TEKVDLALNR	808	//18	9//116	1.869	0.633333	R.STGPVNSLTM[147.04]QPVK[1564.91]GR.K	4YM7_2_RPA2	1	RPA2	STGPVNSLTMQPVKGR	1061	126.127	43277.6	127.131	7575.97	46871.7	4233.11	0.0903128	11.0726	3.46893
				-141	37.6739	JL033021_040221_RPA2HFH_Q2_1to10_50B.12080.12080.5	NP	3.34575	0.12276	0.00241	//18	7//122	0.46125	0.28125	R.STGPVNSLTM[147.04]QPVK[1423.8]GR.K	4YM7_2_RPA2	1	RPA2	STGPVNSLTMQPVKGR	1061	//12	10//61	2.8845	1.2	K.TEK[1953.04]VDLALNR.N	4YM7_2_RPA2	1	RPA2	TEKVDLALNR	808	126.127	16990.5	127.13	112103	17513.9	118602	6.77192	0.147669	-2.75957
				-142	37.3874	JL033021_040221_RPA2HFH_Q2_1to5_50B.11995.11995.5	NP	3.148	0.127339	0.473	//18	5//122	0.26025	0.21875	R.STGPVNSLTM[147.04]QPVK[1423.8]GR.K	4YM7_2_RPA2	1	RPA2	STGPVNSLTMQPVKGR	1061	//12	11//61	2.88775	1.25	K.TEK[1953.04]VDLALNR.N	4YM7_2_RPA2	1	RPA2	TEKVDLALNR	808	126.126	24913.8	127.13	100865	26197.9	105849	4.04034	0.247504	-2.01448
				-141	35.7298	JL033021_040221_RPA2HFH_Q2_5to1_50B.12232.12232.5	NP	3.09475	0.123358	0.157	//18	6//122	0.2955	0.3125	R.STGPVNSLTM[147.04]QPVK[1423.8]GR.K	4YM7_2_RPA2	1	RPA2	STGPVNSLTMQPVKGR	1061	//12	9//61	2.79925	1.15	K.TEK[1953.04]VDLALNR.N	4YM7_2_RPA2	1	RPA2	TEKVDLALNR	808	126.127	75683.4	127.131	20882.2	81906.5	15582.7	0.190249	5.25626	2.39404
				-141	35.3205	JL033021_040221_RPA2HFH_Q2_10to1_1ug.12220.12220.5	NP	2.971	0.120011	0.422	//18	5//122	0.18025	0.21875	R.STGPVNSLTM[147.04]QPVK[1423.8]GR.K	4YM7_2_RPA2	1	RPA2	STGPVNSLTMQPVKGR	1061	//12	8//61	2.79075	1.1	K.TEK[1953.04]VDLALNR.N	4YM7_2_RPA2	1	RPA2	TEKVDLALNR	808	126.127	98005.2	127.13	17705.9	106140	10175.1	0.0958648	10.4314	3.38285
	26	RPA2:1061---RPA2:266	8.8335
				0	0.624628	JL033021_040221_RPA2HFH_Q2_5to1_50B.16256.16256.4	N	8.8335	0.221608		//14	16//72	5.9395	1.73077	R.K[2094.13]NEYLVPVVM[147.04]ILK.A	4YM7_2_RPA2	1	RPA2	KNEYLVPVVMILK	266	//18	11//88	2.894	0.766667	R.STGPVNSLTM[147.04]QPVK[1968.15]GR.K	4YM7_2_RPA2	1	RPA2	STGPVNSLTMQPVKGR	1061	126.127	46741	127.13	12218.1	50589.8	8896.61	0.175858	5.68641	2.50752
				-141	28.7406	JL033021_040221_RPA2HFH_Q2_2to1_50B.15791.15791.5	P	4.8995	0.130768	0.67	//18	8//118	0.731	0.375	R.STGPVNSLTM[147.04]QPVK[1827.06]GR.K	4YM7_2_RPA2	1	RPA2	STGPVNSLTMQPVKGR	1061	//14	13//98	4.1685	1.46154	R.K[1953.04]NEYLVPVVM[147.04]ILK.A	4YM7_2_RPA2	1	RPA2	KNEYLVPVVMILK	266	126.128	124387	127.131	61735.7	134392	54988.3	0.409164	2.44401	1.28925
				-142	35.6988	JL033021_040221_RPA2HFH_Q2_1to5_50B.16066.16066.5	P	4.42375	0.122654	0.000106	//18	6//118	0.46725	0.25	R.STGPVNSLTM[147.04]QPVK[1827.06]GR.K	4YM7_2_RPA2	1	RPA2	STGPVNSLTMQPVKGR	1061	//14	13//98	3.9565	1.46154	R.K[1953.04]NEYLVPVVM[147.04]ILK.A	4YM7_2_RPA2	1	RPA2	KNEYLVPVVMILK	266	126.127	16920.2	127.13	68918.3	17788.9	72332.6	4.06617	0.245932	-2.02367
				-141	26.8478	JL033021_040221_RPA2HFH_Q2_1to10_50B.16172.16172.5	P	4.39925	0.125112	1.39e-05	//18	6//118	0.4545	0.25	R.STGPVNSLTM[147.04]QPVK[1827.06]GR.K	4YM7_2_RPA2	1	RPA2	STGPVNSLTMQPVKGR	1061	//14	12//98	3.94475	1.42308	R.K[1953.04]NEYLVPVVM[147.04]ILK.A	4YM7_2_RPA2	1	RPA2	KNEYLVPVVMILK	266	126.127	11355.7	127.13	73107.2	11720.3	77320.9	6.5972	0.151579	-2.72185
				-141	29.4616	JL033021_040221_RPA2HFH_Q2_1to2_50B.15870.15870.5	P	3.99825	0.107613	0.187	//18	6//118	0.69225	0.3125	R.STGPVNSLTM[147.04]QPVK[1827.06]GR.K	4YM7_2_RPA2	1	RPA2	STGPVNSLTMQPVKGR	1061	//14	11//98	3.306	1.11538	R.K[1953.04]NEYLVPVVM[147.04]ILK.A	4YM7_2_RPA2	1	RPA2	KNEYLVPVVMILK	266	126.127	40782.8	127.13	77047.4	43601	78901.4	1.80962	0.552602	-0.855689
				-141	34.7795	JL033021_040221_RPA2HFH_Q2_5to1_50B.16271.16271.5	P	3.45675	0.100939	0.000401	//18	7//118	0.38075	0.28125	R.STGPVNSLTM[147.04]QPVK[1827.06]GR.K	4YM7_2_RPA2	1	RPA2	STGPVNSLTMQPVKGR	1061	//14	11//98	3.076	1.11538	R.K[1953.04]NEYLVPVVM[147.04]ILK.A	4YM7_2_RPA2	1	RPA2	KNEYLVPVVMILK	266	126.127	60525.5	127.131	14940.7	65516.5	10576.6	0.161435	6.19445	2.63098
				-141	29.5518	JL033021_040221_RPA2HFH_Q2_1to1_50B.16316.16316.5	P	2.75175	0.0863972	3.32e-06	//18	5//118	0.3595	0.21875	R.STGPVNSLTM[147.04]QPVK[1827.06]GR.K	4YM7_2_RPA2	1	RPA2	STGPVNSLTMQPVKGR	1061	//14	11//98	2.39225	1.11538	R.K[1953.04]NEYLVPVVM[147.04]ILK.A	4YM7_2_RPA2	1	RPA2	KNEYLVPVVMILK	266	126.127	28409.2	127.13	27149.6	30588.1	26542.7	0.867746	1.15241	0.204655
	27	RPA2:1061---RPA2:513	2.2735
				-142	29.7504	JL033021_040221_RPA2HFH_Q2_1to1_50B.14899.14899.5	P	2.2735	0.0771371	0.000178	//18	10//119	0.639	0.375	R.STGPVNSLTM[147.04]QPVK[1720.95]GR.K	4YM7_2_RPA2	1	RPA2	STGPVNSLTMQPVKGR	1061	//15	9//93	1.6345	0.846154	R.GSFFAQLK[1953.04]TTTVR.K	4YM7_2_RPA2	1	RPA2	GSFFAQLKTTTVR	513	126.127	42808.8	127.13	44696.5	46061.3	44052.9	0.956398	1.04559	0.0643175
	28	RPA2:1061---RPA2:740	5.223
				0	3.747	JL033021_040221_RPA2HFH_Q2_1to10_1ug.10479.10479.5	N	5.223	0.186589		//9	4//35	1.0725	0.75	R.SDNK[2094.14]LYR.L	4YM7_2_RPA2	1	RPA2	SDNKLYR	740	//18	13//117	4.1505	1.16667	R.STGPVNSLTM[147.04]QPVK[1301.73]GR.K	4YM7_2_RPA2	1	RPA2	STGPVNSLTMQPVKGR	1061	126.127	11075.2	127.13	78368.5	11373.3	82984	7.29636	0.137055	-2.86718
				-141	37.6156	JL033021_040221_RPA2HFH_Q2_2to1_50B.09691.09691.5	NP	3.465	0.104536	0.000333	//18	13//124	2.081	0.96875	R.STGPVNSLTM[147.04]QPVK[1160.62]GR.K	4YM7_2_RPA2	1	RPA2	STGPVNSLTMQPVKGR	1061	//9	6//38	1.384	0.785714	R.SDNK[1953.04]LYR.L	4YM7_2_RPA2	1	RPA2	SDNKLYR	740	126.127	239154	127.13	128021	258314	115715	0.447963	2.23233	1.15855
				-141	37.9522	JL033021_040221_RPA2HFH_Q2_1to1_50B.10414.10414.5	NP	2.5125	0.0808476	0.00808	//18	9//124	1.24425	0.6875	R.STGPVNSLTM[147.04]QPVK[1160.62]GR.K	4YM7_2_RPA2	1	RPA2	STGPVNSLTMQPVKGR	1061	//9	7//38	1.26825	0.857143	R.SDNK[1953.04]LYR.L	4YM7_2_RPA2	1	RPA2	SDNKLYR	740	126.127	63442.5	127.13	59589.5	68316.8	58159.6	0.851323	1.17464	0.232222
				-141	40.7578	JL033021_040221_RPA2HFH_Q2_1to5_50B.10149.10149.5	NP	2.3785	0.0752714	0.146	//18	12//124	1.22075	0.6875	R.STGPVNSLTM[147.04]QPVK[1160.62]GR.K	4YM7_2_RPA2	1	RPA2	STGPVNSLTMQPVKGR	1061	//9	8//38	1.15775	0.928571	R.SDNK[1953.04]LYR.L	4YM7_2_RPA2	1	RPA2	SDNKLYR	740	126.127	59668.9	127.13	217980	62936.2	228226	3.62632	0.275762	-1.8585
				-141	38.1767	JL033021_040221_RPA2HFH_Q2_1to2_50B.10026.10026.5	P	2.113	0.070912	0.39	//18	10//124	1.10175	0.625	R.STGPVNSLTM[147.04]QPVK[1160.62]GR.K	4YM7_2_RPA2	1	RPA2	STGPVNSLTMQPVKGR	1061	//9	7//38	1.01125	0.857143	R.SDNK[1953.04]LYR.L	4YM7_2_RPA2	1	RPA2	SDNKLYR	740	126.127	71444.2	127.13	114299	76549.4	116067	1.51623	0.65953	-0.600489
				-141	40.4211	JL033021_040221_RPA2HFH_Q2_1to2_1ug.10435.10435.5	NP	2.05875	0.0696701	0.0334	//18	8//124	0.76175	0.3125	R.STGPVNSLTM[147.04]QPVK[1160.62]GR.K	4YM7_2_RPA2	1	RPA2	STGPVNSLTMQPVKGR	1061	//9	7//38	1.297	0.857143	R.SDNK[1953.04]LYR.L	4YM7_2_RPA2	1	RPA2	SDNKLYR	740	126.127	37929.7	127.13	59400.5	40650.4	60247.4	1.48208	0.674725	-0.567628
				-141	36.3811	JL033021_040221_RPA2HFH_Q2_2to1_1ug.10409.10409.5	P	1.94725	0.0678532	0.214	//18	10//124	0.912	0.5	R.STGPVNSLTM[147.04]QPVK[1160.62]GR.K	4YM7_2_RPA2	1	RPA2	STGPVNSLTMQPVKGR	1061	//9	7//38	1.03525	0.857143	R.SDNK[1953.04]LYR.L	4YM7_2_RPA2	1	RPA2	SDNKLYR	740	126.127	81286.7	127.13	39753.8	87829.6	35302.1	0.401939	2.48794	1.31495
				-141	36.2689	JL033021_040221_RPA2HFH_Q2_10to1_1ug.10387.10387.5	P	1.39475	0.0517898	0.477	//18	8//124	0.551	0.3125	R.STGPVNSLTM[147.04]QPVK[1160.62]GR.K	4YM7_2_RPA2	1	RPA2	STGPVNSLTMQPVKGR	1061	//9	6//38	0.84375	0.785714	R.SDNK[1953.04]LYR.L	4YM7_2_RPA2	1	RPA2	SDNKLYR	740	126.127	100354	127.13	17915.6	108685	10188.9	0.0937473	10.667	3.41508
				-141	37.7551	JL033021_040221_RPA2HFH_Q2_1to10_50B.10205.10205.4	P	0.70575	0.0207184	0.251	//18	5//97	0.57125	0.21875	R.STGPVNSLTM[147.04]QPVK[1160.62]GR.K	4YM7_2_RPA2	1	RPA2	STGPVNSLTMQPVKGR	1061	//9	3//31	0.1345	0.214286	R.SDNK[1953.04]LYR.L	4YM7_2_RPA2	1	RPA2	SDNKLYR	740	126.127	43114.1	127.13	247639	44741.7	261495	5.84455	0.1711	-2.54709
	29	RPA2:1144---RPA2:6	0.1735
				-735	184.017	JL033021_040221_RPA2HFH_Q2_10to1_100B.13075.13075.5	P	0.1735	0.00803948	0.428	//15	2//87	0.0235	0.0833333	-.M[147.04]SKVIK[1384.74]PPGQAR.T	4YM7_2_RPA2	1	RPA2	MSKVIKPPGQAR	6	//12	3//61	0.15	0.15	K.LLTK[1592.91]SEDGEK.I	4YM7_2_RPA2	1	RPA2	LLTKSEDGEK	1144	126.127	71923.4	127.131	13887.1	77885.8	8424.43	0.108164	9.24522	3.20871
	30	RPA2:443---RPA2:77	2.099
				-143	22.7682	JL033021_040221_RPA2HFH_Q2_1to1_D.14239.14239.5	P	2.099	0.11159	0.282	//12	6//184	1.974	0.282609	K.VIFDGK[1460.78]PLNSEDEISNSGYLGNK.L	4YM7_2_RPA2	1	RPA2	VIFDGKPLNSEDEISNSGYLGNK	77	//12	2//62	0.125	0.1	R.GM[147.04]AINFKDK[2761.38]R.Y	4YM7_2_RPA2	1	RPA2	GMAINFKDKR	443	126.127	4440.85	127.13	4017.9	4783.28	3906.84	0.816769	1.22434	0.292
				-144	20.791	JL033021_040221_RPA2HFH_Q2_1to1_D.14169.14169.5	P	1.4185	0.0753459	0.136	//12	5//184	1.403	0.282609	K.VIFDGK[1460.78]PLNSEDEISNSGYLGNK.L	4YM7_2_RPA2	1	RPA2	VIFDGKPLNSEDEISNSGYLGNK	77	//12	1//62	0.0155	0.05	R.GM[147.04]AINFKDK[2761.38]R.Y	4YM7_2_RPA2	1	RPA2	GMAINFKDKR	443	126.127	4990.31	127.13	3469.22	5383.63	3269.56	0.607315	1.64659	0.719483
	31	RPA2:1139---RPA2:1144	5.4145
				0	0.188066	JL033021_040221_RPA2HFH_Q2_10to1_1ug.07179.07179.3	N	5.4145	0.234841		//8	8//21	3.06925	1.8	R.FEDAK[1525.84]K.L	4YM7_2_RPA2	1	RPA2	FEDAKK	1139	//12	8//42	2.34525	0.833333	K.LLTK[1143.64]SEDGEK.I	4YM7_2_RPA2	1	RPA2	LLTKSEDGEK	1144	126.127	50760.4	127.13	5983.3	54999.4	1854.68	0.0337219	29.6543	4.89017
				0	4.56379	JL033021_040221_RPA2HFH_Q2_5to1_50B.07321.07321.3	N	4.24825	0.215216		//8	7//21	2.2295	1.4	R.FEDAK[1525.85]K.L	4YM7_2_RPA2	1	RPA2	FEDAKK	1139	//12	7//42	2.01875	0.777778	K.LLTK[1143.65]SEDGEK.I	4YM7_2_RPA2	1	RPA2	LLTKSEDGEK	1144	126.127	42051.1	127.13	8717.88	45532.2	5566.88	0.122262	8.17912	3.03195
				0	0.788657	JL033021_040221_RPA2HFH_Q2_2to1_1ug.07180.07180.3	N	3.9685	0.209646		//8	7//21	1.8675	1.4	R.FEDAK[1525.84]K.L	4YM7_2_RPA2	1	RPA2	FEDAKK	1139	//12	8//42	2.101	0.833333	K.LLTK[1143.64]SEDGEK.I	4YM7_2_RPA2	1	RPA2	LLTKSEDGEK	1144	126.127	27315.8	127.13	10436.3	29538.3	8731.08	0.295585	3.38312	1.75835
				-141	48.78	JL033021_040221_RPA2HFH_Q2_2to1_50B.06702.06702.3	NP	3.31025	0.115231	0.000481	//12	9//44	2.45375	1.25	K.LLTK[1002.54]SEDGEK.I	4YM7_2_RPA2	1	RPA2	LLTKSEDGEK	1144	//8	4//23	0.8565	0.75	R.FEDAK[1384.74]K.L	4YM7_2_RPA2	1	RPA2	FEDAKK	1139	126.127	125282	127.13	44487.1	135503	36424.6	0.268811	3.72009	1.89534
				-141	52.2033	JL033021_040221_RPA2HFH_Q2_1to2_50B.07154.07154.4	P	2.977	0.135772	0.427	//12	8//56	2.2755	1.2	K.LLTK[1002.54]SEDGEK.I	4YM7_2_RPA2	1	RPA2	LLTKSEDGEK	1144	//8	4//29	0.7015	0.75	R.FEDAK[1384.74]K.L	4YM7_2_RPA2	1	RPA2	FEDAKK	1139	126.127	133488	127.13	202005	143121	204481	1.42873	0.69992	-0.514738
				-141	49.9983	JL033021_040221_RPA2HFH_Q2_2to1_50B.06696.06696.4	P	2.92	0.134207	0.316	//12	9//56	2.19075	1.25	K.LLTK[1002.54]SEDGEK.I	4YM7_2_RPA2	1	RPA2	LLTKSEDGEK	1144	//8	4//29	0.72925	0.75	R.FEDAK[1384.74]K.L	4YM7_2_RPA2	1	RPA2	FEDAKK	1139	126.127	272831	127.13	131803	294805	116745	0.396007	2.52521	1.3364
				-141	49.6308	JL033021_040221_RPA2HFH_Q2_1to10_50B.07316.07316.4	P	2.88375	0.134268	0.0874	//12	9//56	2.12025	1.25	K.LLTK[1002.54]SEDGEK.I	4YM7_2_RPA2	1	RPA2	LLTKSEDGEK	1144	//8	4//29	0.7635	0.75	R.FEDAK[1384.74]K.L	4YM7_2_RPA2	1	RPA2	FEDAKK	1139	126.127	31894.1	127.13	175288	33162.5	184972	5.57776	0.179283	-2.47969
				-141	50.9783	JL033021_040221_RPA2HFH_Q2_1to5_50B.07218.07218.4	P	2.5015	0.0921533	0.00587	//12	8//56	2.0555	1.2	K.LLTK[1002.54]SEDGEK.I	4YM7_2_RPA2	1	RPA2	LLTKSEDGEK	1144	//8	3//29	0.446	0.416667	R.FEDAK[1384.74]K.L	4YM7_2_RPA2	1	RPA2	FEDAKK	1139	126.127	46692.5	127.13	144903	49458	151084	3.05479	0.327355	-1.61107
				-141	51.5362	JL033021_040221_RPA2HFH_Q2_1to5_50B.07232.07232.3	NP	2.0425	0.0836799	0.000333	//12	6//44	1.25375	0.7	K.LLTK[1002.54]SEDGEK.I	4YM7_2_RPA2	1	RPA2	LLTKSEDGEK	1144	//8	4//23	0.78875	0.75	R.FEDAK[1384.74]K.L	4YM7_2_RPA2	1	RPA2	FEDAKK	1139	126.127	27188.9	127.13	69329.7	28921.6	71851.7	2.48436	0.402518	-1.31287
				-141	47.2182	JL033021_040221_RPA2HFH_Q2_1to2_50B.07151.07151.3	NP	2.03025	0.0820751	0.0273	//12	5//44	1.44725	0.65	K.LLTK[1002.54]SEDGEK.I	4YM7_2_RPA2	1	RPA2	LLTKSEDGEK	1144	//8	3//23	0.583	0.416667	R.FEDAK[1384.74]K.L	4YM7_2_RPA2	1	RPA2	FEDAKK	1139	126.127	43330.9	127.13	51553.4	46571.8	51353.7	1.10268	0.906882	-0.141014
				-141	50.6108	JL033021_040221_RPA2HFH_Q2_5to1_1ug.07269.07269.4	P	1.885	0.0824873	0.0719	//12	8//56	1.5835	0.9	K.LLTK[1002.54]SEDGEK.I	4YM7_2_RPA2	1	RPA2	LLTKSEDGEK	1144	//8	3//29	0.3015	0.416667	R.FEDAK[1384.74]K.L	4YM7_2_RPA2	1	RPA2	FEDAKK	1139	126.128	94600.1	127.131	25355.2	102385	18677.7	0.182427	5.48166	2.45461
				-141	52.2712	JL033021_040221_RPA2HFH_Q2_1to10_50B.07320.07320.3	NP	1.86175	0.0877915	0.127	//12	6//44	1.381	0.7	K.LLTK[1002.54]SEDGEK.I	4YM7_2_RPA2	1	RPA2	LLTKSEDGEK	1144	//8	3//23	0.48075	0.416667	R.FEDAK[1384.74]K.L	4YM7_2_RPA2	1	RPA2	FEDAKK	1139	126.127	13381.1	127.13	60628.3	14018.2	63766.9	4.54886	0.219835	-2.1855
				-142	46.4459	JL033021_040221_RPA2HFH_Q2_1to5_1ug.07226.07226.4	P	1.68875	0.072923	0.0985	//12	7//56	1.3525	0.75	K.LLTK[1002.54]SEDGEK.I	4YM7_2_RPA2	1	RPA2	LLTKSEDGEK	1144	//8	3//29	0.33625	0.416667	R.FEDAK[1384.74]K.L	4YM7_2_RPA2	1	RPA2	FEDAKK	1139	126.127	17305.3	127.13	52614.1	18339.1	54826.7	2.98961	0.334492	-1.57996
				-141	47.4938	JL033021_040221_RPA2HFH_Q2_1to2_50B.07146.07146.3	NP	1.647	0.0667328	0.145	//12	6//44	1.181	0.7	K.LLTK[1002.54]SEDGEK.I	4YM7_2_RPA2	1	RPA2	LLTKSEDGEK	1144	//8	3//23	0.466	0.416667	R.FEDAK[1384.74]K.L	4YM7_2_RPA2	1	RPA2	FEDAKK	1139	126.127	47366.4	127.13	56285.2	50909.6	56062	1.10121	0.908096	-0.139083
				-141	51.7133	JL033021_040221_RPA2HFH_Q2_1to1_50B.07371.07371.4	P	1.491	0.0671108	0.14	//12	6//56	1.2585	0.7	K.LLTK[1002.54]SEDGEK.I	4YM7_2_RPA2	1	RPA2	LLTKSEDGEK	1144	//8	3//29	0.2325	0.416667	R.FEDAK[1384.74]K.L	4YM7_2_RPA2	1	RPA2	FEDAKK	1139	126.127	58890.3	127.131	47699.1	63476.7	45826.7	0.721945	1.38515	0.470039
				-142	50.4031	JL033021_040221_RPA2HFH_Q2_5to1_1ug.07283.07283.3	NP	1.45075	0.0667687	1.35e-07	//12	5//44	0.95975	0.5	K.LLTK[1002.54]SEDGEK.I	4YM7_2_RPA2	1	RPA2	LLTKSEDGEK	1144	//8	3//23	0.491	0.416667	R.FEDAK[1384.74]K.L	4YM7_2_RPA2	1	RPA2	FEDAKK	1139	126.127	43079.8	127.13	8828.78	46646.9	5593.36	0.119909	8.33968	3.05999
				-141	46.1157	JL033021_040221_RPA2HFH_Q2_1to1_50B.07379.07379.3	NP	1.18125	0.0531735	5.06e-08	//12	5//44	1.0515	0.65	K.LLTK[1002.54]SEDGEK.I	4YM7_2_RPA2	1	RPA2	LLTKSEDGEK	1144	//8	2//23	0.12975	0.166667	R.FEDAK[1384.74]K.L	4YM7_2_RPA2	1	RPA2	FEDAKK	1139	126.126	34960.8	127.13	23975.4	37718.9	22553	0.597924	1.67245	0.741966
				-141	46.7588	JL033021_040221_RPA2HFH_Q2_10to1_50B.07268.07268.3	P	1.06125	0.0508944	0.294	//12	5//44	0.62275	0.35	K.LLTK[1002.54]SEDGEK.I	4YM7_2_RPA2	1	RPA2	LLTKSEDGEK	1144	//8	3//23	0.4385	0.416667	R.FEDAK[1384.74]K.L	4YM7_2_RPA2	1	RPA2	FEDAKK	1139	126.127	33758.6	127.13	4303.3	36575.1	1580.74	0.0432188	23.1381	4.5322
	32	RPA2:740---RPA2:808	5.422
				-141	46.5611	JL033021_040221_RPA2HFH_Q2_1to10_50B.11007.11007.5	NP	5.422	0.262478	0.000651	//12	8//68	4.018	1.25	K.TEK[1160.62]VDLALNR.N	4YM7_2_RPA2	1	RPA2	TEKVDLALNR	808	//9	5//42	1.404	0.857143	R.SDNK[1423.8]LYR.L	4YM7_2_RPA2	1	RPA2	SDNKLYR	740	126.127	20077.4	127.131	121906	20781.9	128830	6.19915	0.161312	-2.63207
				-141	46.2128	JL033021_040221_RPA2HFH_Q2_1to2_50B.10763.10763.5	NP	5.4105	0.26936	0.00348	//12	8//68	3.998	1.25	K.TEK[1160.62]VDLALNR.N	4YM7_2_RPA2	1	RPA2	TEKVDLALNR	808	//9	5//42	1.4125	0.857143	R.SDNK[1423.8]LYR.L	4YM7_2_RPA2	1	RPA2	SDNKLYR	740	126.127	65674.2	127.13	96383.5	70437.8	97387	1.3826	0.723277	-0.46738
				-141	47.6062	JL033021_040221_RPA2HFH_Q2_1to5_50B.10915.10915.5	NP	5.409	0.261513	0.00105	//12	8//68	4	1.25	K.TEK[1160.62]VDLALNR.N	4YM7_2_RPA2	1	RPA2	TEKVDLALNR	808	//9	5//42	1.409	0.857143	R.SDNK[1423.8]LYR.L	4YM7_2_RPA2	1	RPA2	SDNKLYR	740	126.127	29795.3	127.13	105561	31453.5	110442	3.51129	0.284796	-1.812
				-141	47.1881	JL033021_040221_RPA2HFH_Q2_2to1_50B.10502.10502.5	NP	5.30675	0.258368	0.0158	//12	8//68	3.91475	1.25	K.TEK[1160.62]VDLALNR.N	4YM7_2_RPA2	1	RPA2	TEKVDLALNR	808	//9	5//42	1.392	0.857143	R.SDNK[1423.8]LYR.L	4YM7_2_RPA2	1	RPA2	SDNKLYR	740	126.127	114474	127.13	52833	123713	46338.3	0.374561	2.66979	1.41673
				-2	0.3466	JL033021_040221_RPA2HFH_Q2_2to1_100B.14620.14620.6	N	5.13775	0.172625		//9	4//28	1.108	0.75	R.SDNK[2882.52]LYR.L	4YM7_2_RPA2	1	RPA2	SDNKLYR	740	//13	15//107	4.02975	1.08333	R.GFGYGTM[147.04]YK[1301.72]TEK[425.27]VDLALNR.N	4YM7_2_RPA2	1	RPA2	GFGYGTMYKTEKVDLALNR	808	126.127	104666	127.131	67550.9	112958	62990.1	0.557642	1.79327	0.84259
				-142	47.634	JL033021_040221_RPA2HFH_Q2_1to1_50B.11236.11236.5	NP	5.10975	0.266216	2.25e-05	1//12	9//68	3.75875	1.3	K.TEK[1160.62]VDLALNR.N	4YM7_2_RPA2	1	RPA2	TEKVDLALNR	808	//9	5//42	1.351	0.857143	R.SDNK[1423.8]LYR.L	4YM7_2_RPA2	1	RPA2	SDNKLYR	740	126.127	34015.6	127.131	35793.4	36597.8	35301.9	0.964592	1.03671	0.0520094
				-141	48.5815	JL033021_040221_RPA2HFH_Q2_5to1_50B.11168.11168.5	NP	4.3655	0.24195	0.00675	//12	8//68	3.243	1.25	K.TEK[1160.62]VDLALNR.N	4YM7_2_RPA2	1	RPA2	TEKVDLALNR	808	//9	5//42	1.1225	0.857143	R.SDNK[1423.8]LYR.L	4YM7_2_RPA2	1	RPA2	SDNKLYR	740	126.127	78321.7	127.131	22080.6	84757.9	16630	0.196206	5.09668	2.34956
				-141	48.295	JL033021_040221_RPA2HFH_Q2_1to2_50B.10758.10758.4	P	3.61975	0.12297	0.525	//12	8//55	3.01475	1.25	K.TEK[1160.62]VDLALNR.N	4YM7_2_RPA2	1	RPA2	TEKVDLALNR	808	//9	4//35	0.605	0.642857	R.SDNK[1423.8]LYR.L	4YM7_2_RPA2	1	RPA2	SDNKLYR	740	126.127	114040	127.13	185057	122168	188066	1.5394	0.649603	-0.622371
				-141	44.7279	JL033021_040221_RPA2HFH_Q2_5to1_1ug.11157.11157.4	P	3.537	0.151128	3.62e-06	//12	8//55	3.285	1.25	K.TEK[1160.62]VDLALNR.N	4YM7_2_RPA2	1	RPA2	TEKVDLALNR	808	//9	3//35	0.252	0.571429	R.SDNK[1423.8]LYR.L	4YM7_2_RPA2	1	RPA2	SDNKLYR	740	126.127	93284	127.131	24123.2	100967	17475.6	0.173081	5.77763	2.53048
				-141	47.2917	JL033021_040221_RPA2HFH_Q2_1to5_1ug.11180.11180.4	P	3.3295	0.146336	5.53e-06	//12	8//55	3.25175	1.25	K.TEK[1160.62]VDLALNR.N	4YM7_2_RPA2	1	RPA2	TEKVDLALNR	808	//9	2//35	0.07775	0.142857	R.SDNK[1423.8]LYR.L	4YM7_2_RPA2	1	RPA2	SDNKLYR	740	126.127	19714.1	127.13	73456	20781.9	76944.3	3.70246	0.27009	-1.88849
				-141	47.5147	JL033021_040221_RPA2HFH_Q2_1to2_1ug.11193.11193.4	P	3.26675	0.129976	0.00567	//12	7//55	2.89175	1.05	K.TEK[1160.62]VDLALNR.N	4YM7_2_RPA2	1	RPA2	TEKVDLALNR	808	//9	4//35	0.375	0.642857	R.SDNK[1423.8]LYR.L	4YM7_2_RPA2	1	RPA2	SDNKLYR	740	126.127	40998.9	127.13	62026.8	43957.5	62786.2	1.42834	0.700115	-0.514337
				-141	47.6262	JL033021_040221_RPA2HFH_Q2_10to1_1ug.11108.11108.4	P	3.22525	0.129069	0.278	//12	8//55	2.89325	1.25	K.TEK[1160.62]VDLALNR.N	4YM7_2_RPA2	1	RPA2	TEKVDLALNR	808	//9	3//35	0.332	0.571429	R.SDNK[1423.8]LYR.L	4YM7_2_RPA2	1	RPA2	SDNKLYR	740	126.128	143207	127.131	25894	155093	14891.4	0.0960163	10.4149	3.38058
				-1	1.95021	JL033021_040221_RPA2HFH_Q2_5to1_50B.11227.11227.5	N	3.202	0.171588		//9	4//37	0.909	0.75	R.SDNK[1564.91]LYR.L	4YM7_2_RPA2	1	RPA2	SDNKLYR	740	//12	11//58	2.293	1.55556	K.TEK[1301.72]VDLALNR.N	4YM7_2_RPA2	1	RPA2	TEKVDLALNR	808	126.127	42578.9	127.13	11717.4	46080.2	8733.76	0.189534	5.2761	2.39947
				-141	47.0688	JL033021_040221_RPA2HFH_Q2_2to1_1ug.11175.11175.4	P	3.1745	0.119208	0.255	//12	8//55	2.8145	1.25	K.TEK[1160.62]VDLALNR.N	4YM7_2_RPA2	1	RPA2	TEKVDLALNR	808	//9	4//35	0.36	0.642857	R.SDNK[1423.8]LYR.L	4YM7_2_RPA2	1	RPA2	SDNKLYR	740	126.127	122427	127.13	59865.6	132282	53160.2	0.401871	2.48836	1.31519
				-141	45.2853	JL033021_040221_RPA2HFH_Q2_1to1_1ug.11148.11148.4	P	3.11425	0.139687	0.336	//12	8//55	2.79725	1.25	K.TEK[1160.62]VDLALNR.N	4YM7_2_RPA2	1	RPA2	TEKVDLALNR	808	//9	4//35	0.317	0.642857	R.SDNK[1423.8]LYR.L	4YM7_2_RPA2	1	RPA2	SDNKLYR	740	126.127	51273.8	127.131	47930.3	55215	46758.2	0.846839	1.18086	0.239841
				-141	45.2853	JL033021_040221_RPA2HFH_Q2_1to10_1ug.11242.11242.4	P	3.06725	0.135701	0.00723	//12	8//55	3.00275	1.25	K.TEK[1160.62]VDLALNR.N	4YM7_2_RPA2	1	RPA2	TEKVDLALNR	808	//9	1//35	0.0645	0.0714286	R.SDNK[1423.8]LYR.L	4YM7_2_RPA2	1	RPA2	SDNKLYR	740	126.127	11018.8	127.131	75418.3	11336.1	79827.7	7.04189	0.142007	-2.81596
				-141	48.295	JL033021_040221_RPA2HFH_Q2_5to1_50B.11135.11135.4	P	2.876	0.123433	0.307	//12	8//55	2.67975	1.25	K.TEK[1160.62]VDLALNR.N	4YM7_2_RPA2	1	RPA2	TEKVDLALNR	808	//9	3//35	0.19625	0.214286	R.SDNK[1423.8]LYR.L	4YM7_2_RPA2	1	RPA2	SDNKLYR	740	126.127	68163.4	127.13	16167.1	73789.7	11205.2	0.151853	6.58532	2.71925
				-141	44.0591	JL033021_040221_RPA2HFH_Q2_1to1_50B.11197.11197.4	P	2.716	0.122444	0.00165	//12	8//55	2.55425	1.25	K.TEK[1160.62]VDLALNR.N	4YM7_2_RPA2	1	RPA2	TEKVDLALNR	808	//9	2//35	0.16175	0.142857	R.SDNK[1423.8]LYR.L	4YM7_2_RPA2	1	RPA2	SDNKLYR	740	126.127	39168.3	127.13	37501.5	42171.8	36669.7	0.869532	1.15004	0.201689
				-141	48.295	JL033021_040221_RPA2HFH_Q2_1to10_50B.10980.10980.4	P	2.20775	0.0850885	0.214	//12	7//55	1.83725	1.05	K.TEK[1160.62]VDLALNR.N	4YM7_2_RPA2	1	RPA2	TEKVDLALNR	808	//9	3//35	0.3705	0.571429	R.SDNK[1423.8]LYR.L	4YM7_2_RPA2	1	RPA2	SDNKLYR	740	126.127	34948.5	127.13	240818	35941.9	254919	7.09252	0.140994	-2.8263
				439	-104.248	JL033021_040221_RPA2HFH_Q2_1to1_50B.11252.11252.3	P	2.03225	0.0754236	0.112	//12	7//42	1.96325	1.05	K.TEK[1160.62]VDLALNR.N	4YM7_2_RPA2	1	RPA2	TEKVDLALNR	808	//9	2//28	0.069	0.142857	R.SDNK[1423.8]LYR.L	4YM7_2_RPA2	1	RPA2	SDNKLYR	740	126.127	137185	127.131	126789	147741	123549	0.836253	1.19581	0.257989
				439	-105	JL033021_040221_RPA2HFH_Q2_1to5_1ug.11224.11224.3	P	1.70875	0.0657098	0.0363	//12	7//42	1.645	1.05	K.TEK[1160.62]VDLALNR.N	4YM7_2_RPA2	1	RPA2	TEKVDLALNR	808	//9	2//28	0.06375	0.142857	R.SDNK[1423.8]LYR.L	4YM7_2_RPA2	1	RPA2	SDNKLYR	740	126.127	46098.5	127.13	157345	48712.6	164469	3.37632	0.296181	-1.75545
	33	RPA2:740---RPA2:916	5.4135
				0	6.60978	JL033021_040221_RPA2HFH_Q2_2to1_100B.10266.10266.5	N	5.4135	0.246046		//9	8//35	1.98275	1.5	R.SDNK[1798.01]LYR.L	4YM7_2_RPA2	1	RPA2	SDNKLYR	740	1//14	11//74	3.43075	1.09091	R.RTPQIGDK[1301.73]FSSR.H	4YM7_2_RPA2	1	RPA2	RTPQIGDKFSSR	916	126.127	91232.4	127.13	45478	98568.9	40543.2	0.411319	2.43121	1.28167
				0	1.37352	JL033021_040221_RPA2HFH_Q2_5to1_100B.10341.10341.5	N	4.02875	0.214615		//9	5//35	1.129	0.833333	R.SDNK[1798]LYR.L	4YM7_2_RPA2	1	RPA2	SDNKLYR	740	//14	10//74	2.89975	1.13636	R.RTPQIGDK[1301.72]FSSR.H	4YM7_2_RPA2	1	RPA2	RTPQIGDKFSSR	916	126.127	83051.9	127.13	21072.6	89895.9	15125.2	0.168252	5.94346	2.5713
				0	5.41972	JL033021_040221_RPA2HFH_Q2_5to1_100B.10335.10335.5	N	3.3585	0.163741		//9	5//35	1.1865	0.833333	R.SDNK[1798.01]LYR.L	4YM7_2_RPA2	1	RPA2	SDNKLYR	740	//14	8//74	2.172	0.681818	R.RTPQIGDK[1301.73]FSSR.H	4YM7_2_RPA2	1	RPA2	RTPQIGDKFSSR	916	126.127	82187.5	127.13	18755	88977.2	12719.3	0.14295	6.99544	2.80642
				-141	46.6862	JL033021_040221_RPA2HFH_Q2_1to1_50B.10974.10974.4	P	2.885	0.114993	0.000536	//13	6//62	1.662	0.727273	R.TPQIGDK[1160.62]FSSR.H	4YM7_2_RPA2	1	RPA2	TPQIGDKFSSR	916	//9	6//34	1.223	0.928571	R.SDNK[1500.79]LYR.L	4YM7_2_RPA2	1	RPA2	SDNKLYR	740	126.127	76572.2	127.13	68169.2	82485.8	66174.7	0.802256	1.24649	0.317866
				-141	45.717	JL033021_040221_RPA2HFH_Q2_5to1_50B.10912.10912.4	P	2.783	0.105868	0.0218	//13	7//62	1.6555	0.772727	R.TPQIGDK[1160.62]FSSR.H	4YM7_2_RPA2	1	RPA2	TPQIGDKFSSR	916	//9	7//34	1.1275	1	R.SDNK[1500.79]LYR.L	4YM7_2_RPA2	1	RPA2	SDNKLYR	740	126.127	190909	127.13	41999.7	206693	27867.7	0.134826	7.41697	2.89083
				-141	43.8863	JL033021_040221_RPA2HFH_Q2_1to5_50B.10606.10606.4	P	2.59125	0.102944	0.655	//13	5//62	1.31	0.409091	R.TPQIGDK[1160.62]FSSR.H	4YM7_2_RPA2	1	RPA2	TPQIGDKFSSR	916	//9	8//34	1.28125	1.07143	R.SDNK[1500.79]LYR.L	4YM7_2_RPA2	1	RPA2	SDNKLYR	740	126.127	78935.4	127.13	243908	83619.1	254281	3.04095	0.328845	-1.60452
				-141	46.2092	JL033021_040221_RPA2HFH_Q2_1to5_1ug.10964.10964.5	NP	2.53075	0.0993991	7.43e-05	//13	8//77	1.0695	0.954545	R.TPQIGDK[1160.62]FSSR.H	4YM7_2_RPA2	1	RPA2	TPQIGDKFSSR	916	//9	7//41	1.46125	1	R.SDNK[1500.79]LYR.L	4YM7_2_RPA2	1	RPA2	SDNKLYR	740	126.127	22187.4	127.13	77465.6	23431.5	81018.9	3.4577	0.28921	-1.78981
				-141	44.1017	JL033021_040221_RPA2HFH_Q2_1to10_50B.10712.10712.4	P	2.465	0.095391	0.29	//13	6//62	1.33575	0.454545	R.TPQIGDK[1160.62]FSSR.H	4YM7_2_RPA2	1	RPA2	TPQIGDKFSSR	916	//9	6//34	1.12925	0.928571	R.SDNK[1500.79]LYR.L	4YM7_2_RPA2	1	RPA2	SDNKLYR	740	126.127	59581.3	127.13	325580	61966	343537	5.54396	0.180376	-2.47092
				-141	45.3342	JL033021_040221_RPA2HFH_Q2_1to10_50B.10753.10753.5	P	2.46225	0.0827717	0.0121	//13	8//77	1.042	0.818182	R.TPQIGDK[1160.62]FSSR.H	4YM7_2_RPA2	1	RPA2	TPQIGDKFSSR	916	//9	7//41	1.42025	1	R.SDNK[1500.79]LYR.L	4YM7_2_RPA2	1	RPA2	SDNKLYR	740	126.127	28213.6	127.13	154235	29342.3	162743	5.54635	0.180299	-2.47154
				-141	46.1477	JL033021_040221_RPA2HFH_Q2_1to2_50B.10504.10504.4	P	2.452	0.0941303	0.262	//13	6//62	1.33675	0.454545	R.TPQIGDK[1160.62]FSSR.H	4YM7_2_RPA2	1	RPA2	TPQIGDKFSSR	916	//9	8//34	1.11525	1.21429	R.SDNK[1500.79]LYR.L	4YM7_2_RPA2	1	RPA2	SDNKLYR	740	126.127	193987	127.13	259896	208259	261085	1.25365	0.797671	-0.326135
				-141	44.5324	JL033021_040221_RPA2HFH_Q2_2to1_1ug.10928.10928.4	P	2.32675	0.0868725	0.459	//13	8//62	1.32525	0.681818	R.TPQIGDK[1160.62]FSSR.H	4YM7_2_RPA2	1	RPA2	TPQIGDKFSSR	916	//9	7//34	1.0015	1.14286	R.SDNK[1500.79]LYR.L	4YM7_2_RPA2	1	RPA2	SDNKLYR	740	126.127	131580	127.131	57187.3	142230	49468.6	0.347808	2.87515	1.52364
				-141	46.1419	JL033021_040221_RPA2HFH_Q2_1to1_1ug.10921.10921.5	NP	2.30875	0.0928103	0.0188	//13	6//77	0.9465	0.727273	R.TPQIGDK[1160.62]FSSR.H	4YM7_2_RPA2	1	RPA2	TPQIGDKFSSR	916	//9	6//41	1.36225	0.928571	R.SDNK[1500.79]LYR.L	4YM7_2_RPA2	1	RPA2	SDNKLYR	740	126.127	58735.5	127.13	50752.5	63284	49112.6	0.776067	1.28855	0.365748
				-141	45.065	JL033021_040221_RPA2HFH_Q2_2to1_50B.10203.10203.5	P	2.2965	0.0769553	0.0406	//13	8//77	1.08225	0.818182	R.TPQIGDK[1160.62]FSSR.H	4YM7_2_RPA2	1	RPA2	TPQIGDKFSSR	916	//9	5//41	1.21425	0.714286	R.SDNK[1500.79]LYR.L	4YM7_2_RPA2	1	RPA2	SDNKLYR	740	126.127	145371	127.13	72559.7	157060	64703.3	0.411966	2.42739	1.2794
				-141	45.738	JL033021_040221_RPA2HFH_Q2_1to2_50B.10548.10548.5	P	2.267	0.084272	0.0131	//13	8//77	1.01975	0.818182	R.TPQIGDK[1160.62]FSSR.H	4YM7_2_RPA2	1	RPA2	TPQIGDKFSSR	916	//9	5//41	1.24725	0.714286	R.SDNK[1500.79]LYR.L	4YM7_2_RPA2	1	RPA2	SDNKLYR	740	126.127	62736.2	127.13	94267.9	67268.8	95383.7	1.41795	0.705244	-0.503806
				-141	45.2669	JL033021_040221_RPA2HFH_Q2_1to2_1ug.10983.10983.5	P	2.25575	0.0826994	0.0062	//13	7//77	0.97225	0.772727	R.TPQIGDK[1160.62]FSSR.H	4YM7_2_RPA2	1	RPA2	TPQIGDKFSSR	916	//9	6//41	1.2835	0.785714	R.SDNK[1500.79]LYR.L	4YM7_2_RPA2	1	RPA2	SDNKLYR	740	126.127	42078.5	127.13	66950.8	45088.3	67965.7	1.50739	0.663398	-0.592055
				-141	45.065	JL033021_040221_RPA2HFH_Q2_10to1_1ug.10904.10904.5	P	2.25125	0.0798925	0.128	//13	7//77	0.90775	0.772727	R.TPQIGDK[1160.62]FSSR.H	4YM7_2_RPA2	1	RPA2	TPQIGDKFSSR	916	//9	6//41	1.3435	0.928571	R.SDNK[1500.79]LYR.L	4YM7_2_RPA2	1	RPA2	SDNKLYR	740	126.127	117729	127.13	21089.4	127501	12030.2	0.0943535	10.5984	3.40578
				-141	43.9208	JL033021_040221_RPA2HFH_Q2_5to1_1ug.10971.10971.5	P	2.231	0.0900759	0.00172	//13	7//77	0.8915	0.772727	R.TPQIGDK[1160.62]FSSR.H	4YM7_2_RPA2	1	RPA2	TPQIGDKFSSR	916	//9	4//41	1.3395	0.642857	R.SDNK[1500.79]LYR.L	4YM7_2_RPA2	1	RPA2	SDNKLYR	740	126.127	57237.7	127.13	13239.7	61964.8	9049.03	0.146035	6.84768	2.77561
				-141	35.3463	JL033021_040221_RPA2HFH_Q2_1to2_100B.10388.10388.5	NP	2.21475	0.114748	0.000226	//14	7//88	1.0025	0.5	R.RTPQIGDK[1160.62]FSSR.H	4YM7_2_RPA2	1	RPA2	RTPQIGDKFSSR	916	//9	6//39	1.21225	0.785714	R.SDNK[1656.89]LYR.L	4YM7_2_RPA2	1	RPA2	SDNKLYR	740	126.127	41032.8	127.13	63959.1	43978.6	64853.8	1.47467	0.67812	-0.560388
				-141	37.6131	JL033021_040221_RPA2HFH_Q2_1to1_100B.10546.10546.5	NP	2.118	0.112096	0.0252	//14	8//88	0.9365	0.625	R.RTPQIGDK[1160.62]FSSR.H	4YM7_2_RPA2	1	RPA2	RTPQIGDKFSSR	916	//9	5//39	1.1815	0.714286	R.SDNK[1656.89]LYR.L	4YM7_2_RPA2	1	RPA2	SDNKLYR	740	126.127	42764.9	127.13	43080.9	46026.8	42325.6	0.919585	1.08745	0.120946
				-141	45.6093	JL033021_040221_RPA2HFH_Q2_1to1_1ug.10901.10901.4	P	1.9825	0.0787863	0.354	//13	7//62	1.086	0.636364	R.TPQIGDK[1160.62]FSSR.H	4YM7_2_RPA2	1	RPA2	TPQIGDKFSSR	916	//9	5//34	0.8965	0.857143	R.SDNK[1500.79]LYR.L	4YM7_2_RPA2	1	RPA2	SDNKLYR	740	126.127	78362.4	127.131	68369.1	84425.5	66228.2	0.784458	1.27477	0.350233
				-141	45.5471	JL033021_040221_RPA2HFH_Q2_5to1_100B.10506.10506.5	NP	1.9765	0.0947416	0.131	//14	6//88	0.815	0.541667	R.RTPQIGDK[1160.62]FSSR.H	4YM7_2_RPA2	1	RPA2	RTPQIGDKFSSR	916	//9	6//39	1.1615	0.928571	R.SDNK[1656.89]LYR.L	4YM7_2_RPA2	1	RPA2	SDNKLYR	740	126.127	109949	127.13	25681.6	119027	17649.5	0.148282	6.74393	2.75359
				-141	47.9591	JL033021_040221_RPA2HFH_Q2_1to10_1ug.11050.11050.5	P	1.94825	0.0904543	0.0571	//13	6//77	0.8175	0.727273	R.TPQIGDK[1160.62]FSSR.H	4YM7_2_RPA2	1	RPA2	TPQIGDKFSSR	916	//9	4//41	1.13075	0.642857	R.SDNK[1500.79]LYR.L	4YM7_2_RPA2	1	RPA2	SDNKLYR	740	126.127	9798.62	127.13	67062.7	10080.8	70983.5	7.04143	0.142017	-2.81587
				-141	40.8875	JL033021_040221_RPA2HFH_Q2_10to1_100B.10308.10308.5	NP	1.942	0.097755	0.291	//14	7//88	0.80475	0.583333	R.RTPQIGDK[1160.62]FSSR.H	4YM7_2_RPA2	1	RPA2	RTPQIGDKFSSR	916	//9	8//39	1.13725	1.07143	R.SDNK[1656.89]LYR.L	4YM7_2_RPA2	1	RPA2	SDNKLYR	740	126.127	78496.1	127.13	12662.5	85023.7	6522.04	0.0767085	13.0364	3.70447
				341	-11.9488	JL033021_040221_RPA2HFH_Q2_2to1_50B.10156.10156.4	P	1.933	0.0594413	0.016	1//13	7//62	0.739	0.818182	R.TPQIGDK[1160.62]FSSR.H	4YM7_2_RPA2	1	RPA2	TPQIGDKFSSR	916	//9	7//34	1.194	1	R.SDNK[1500.79]LYR.L	4YM7_2_RPA2	1	RPA2	SDNKLYR	740	126.127	225140	127.13	107738	243281	95238.7	0.391477	2.55443	1.353
				341	-11.195	JL033021_040221_RPA2HFH_Q2_1to2_50B.10503.10503.4	P	1.932	0.0622493	0.03	1//13	8//62	0.747	0.863636	R.TPQIGDK[1160.62]FSSR.H	4YM7_2_RPA2	1	RPA2	TPQIGDKFSSR	916	1//9	8//34	1.185	0.928571	R.SDNK[1500.79]LYR.L	4YM7_2_RPA2	1	RPA2	SDNKLYR	740	126.127	85806.7	127.13	125068	92037.5	126317	1.37245	0.728622	-0.456758
				-141	43.7786	JL033021_040221_RPA2HFH_Q2_1to2_1ug.10970.10970.4	P	1.92575	0.0717426	0.00598	//13	6//62	0.98225	0.454545	R.TPQIGDK[1160.62]FSSR.H	4YM7_2_RPA2	1	RPA2	TPQIGDKFSSR	916	//9	5//34	0.9435	0.857143	R.SDNK[1500.79]LYR.L	4YM7_2_RPA2	1	RPA2	SDNKLYR	740	126.127	58113.5	127.13	83302	62344.7	84047.9	1.34812	0.741776	-0.430945
				-141	42.5246	JL033021_040221_RPA2HFH_Q2_1to1_100B.10719.10719.5	NP	1.9015	0.0777837	0.0359	//14	7//88	0.835	0.708333	R.RTPQIGDK[1160.62]FSSR.H	4YM7_2_RPA2	1	RPA2	RTPQIGDKFSSR	916	//9	6//39	1.0665	0.928571	R.SDNK[1656.89]LYR.L	4YM7_2_RPA2	1	RPA2	SDNKLYR	740	126.127	73883.9	127.131	71091.6	79546.5	69547.7	0.874301	1.14377	0.193797
				-141	43.1543	JL033021_040221_RPA2HFH_Q2_1to10_100B.10788.10788.5	NP	1.88625	0.08497	0.000277	//14	6//88	0.79375	0.333333	R.RTPQIGDK[1160.62]FSSR.H	4YM7_2_RPA2	1	RPA2	RTPQIGDKFSSR	916	//9	6//39	1.0925	0.928571	R.SDNK[1656.89]LYR.L	4YM7_2_RPA2	1	RPA2	SDNKLYR	740	126.127	15318.2	127.13	94156.6	15846.3	99521.4	6.2804	0.159225	-2.65086
				341	-10.7643	JL033021_040221_RPA2HFH_Q2_1to10_50B.10713.10713.4	P	1.71675	0.0562417	0.0845	1//13	8//62	0.745	0.863636	R.TPQIGDK[1160.62]FSSR.H	4YM7_2_RPA2	1	RPA2	TPQIGDKFSSR	916	//9	5//34	0.97175	0.714286	R.SDNK[1500.79]LYR.L	4YM7_2_RPA2	1	RPA2	SDNKLYR	740	126.127	21754.2	127.13	143022	22428.5	151307	6.7462	0.148232	-2.75407
				-141	41.3912	JL033021_040221_RPA2HFH_Q2_1to10_100B.10633.10633.5	NP	1.69725	0.0795058	0.000219	//14	6//88	0.72375	0.333333	R.RTPQIGDK[1160.62]FSSR.H	4YM7_2_RPA2	1	RPA2	RTPQIGDKFSSR	916	//9	5//39	0.9735	0.714286	R.SDNK[1656.89]LYR.L	4YM7_2_RPA2	1	RPA2	SDNKLYR	740	126.127	11174.4	127.13	73019.1	11524.4	77242.8	6.70257	0.149196	-2.74472
				-141	40.1318	JL033021_040221_RPA2HFH_Q2_1to5_100B.11010.11010.5	NP	1.6545	0.077945	0.00617	//14	5//88	0.69675	0.416667	R.RTPQIGDK[1160.62]FSSR.H	4YM7_2_RPA2	1	RPA2	RTPQIGDKFSSR	916	//9	7//39	0.95775	0.857143	R.SDNK[1656.89]LYR.L	4YM7_2_RPA2	1	RPA2	SDNKLYR	740	126.126	15397.1	127.13	55045.9	16249.9	57603.9	3.54488	0.282097	-1.82574
				-141	43.6581	JL033021_040221_RPA2HFH_Q2_1to2_100B.10570.10570.5	NP	1.62675	0.0860009	0.00781	//14	7//88	0.70225	0.625	R.RTPQIGDK[1160.62]FSSR.H	4YM7_2_RPA2	1	RPA2	RTPQIGDKFSSR	916	//9	7//39	0.9245	1.14286	R.SDNK[1656.89]LYR.L	4YM7_2_RPA2	1	RPA2	SDNKLYR	740	126.127	35852.9	127.131	61791.4	38378.8	62995.9	1.64142	0.609228	-0.714947
				-141	44.9632	JL033021_040221_RPA2HFH_Q2_10to1_50B.10940.10940.4	P	1.61075	0.0623633	0.0106	//13	5//62	0.6315	0.318182	R.TPQIGDK[1160.62]FSSR.H	4YM7_2_RPA2	1	RPA2	TPQIGDKFSSR	916	//9	6//34	0.97925	0.928571	R.SDNK[1500.79]LYR.L	4YM7_2_RPA2	1	RPA2	SDNKLYR	740	126.127	94243	127.13	17201.4	102064	9972.2	0.0977056	10.2348	3.35542
				-140	45.8997	JL033021_040221_RPA2HFH_Q2_1to5_100B.11206.11206.5	P	1.52175	0.0839262	0.273	//14	6//88	0.58375	0.458333	R.RTPQIGDK[1160.62]FSSR.H	4YM7_2_RPA2	1	RPA2	RTPQIGDKFSSR	916	//9	6//39	0.938	0.928571	R.SDNK[1656.89]LYR.L	4YM7_2_RPA2	1	RPA2	SDNKLYR	740	126.127	18271.9	127.13	73550.8	19217.1	77175.3	4.01597	0.249006	-2.00575
				-142	44.6401	JL033021_040221_RPA2HFH_Q2_1to10_1ug.10974.10974.4	P	1.4565	0.0566005	0.137	//13	6//62	0.72025	0.454545	R.TPQIGDK[1160.62]FSSR.H	4YM7_2_RPA2	1	RPA2	TPQIGDKFSSR	916	//9	6//34	0.73625	0.714286	R.SDNK[1500.79]LYR.L	4YM7_2_RPA2	1	RPA2	SDNKLYR	740	126.127	16476.2	127.13	93372.9	17108.5	98577.6	5.7619	0.173554	-2.52654
				-141	45.738	JL033021_040221_RPA2HFH_Q2_1to5_50B.10692.10692.5	P	1.411	0.0567122	0.086	//13	5//77	0.37575	0.409091	R.TPQIGDK[1160.62]FSSR.H	4YM7_2_RPA2	1	RPA2	TPQIGDKFSSR	916	1//9	5//41	1.03525	0.714286	R.SDNK[1500.79]LYR.L	4YM7_2_RPA2	1	RPA2	SDNKLYR	740	126.127	26388.1	127.13	89303	27890.7	93326.5	3.34615	0.298851	-1.7425
				-141	42.271	JL033021_040221_RPA2HFH_Q2_1to5_1ug.10941.10941.4	P	1.2105	0.0489714	0.0157	//13	6//62	0.75475	0.454545	R.TPQIGDK[1160.62]FSSR.H	4YM7_2_RPA2	1	RPA2	TPQIGDKFSSR	916	//9	4//34	0.45575	0.428571	R.SDNK[1500.79]LYR.L	4YM7_2_RPA2	1	RPA2	SDNKLYR	740	126.127	26501.2	127.13	89417.8	28012.5	93439.4	3.33563	0.299793	-1.73796
	34	RPA2:740---RPA2:805	4.6255
				-141	31.9911	JL033021_040221_RPA2HFH_Q2_2to1_1ug.12793.12793.5	P	4.6255	0.164579	0.464	//15	17//143	4.47575	1.15789	R.GFGYGTM[147.04]YK[1160.62]TEKVDLALNR.N	4YM7_2_RPA2	1	RPA2	GFGYGTMYKTEKVDLALNR	805	//9	2//38	0.14975	0.142857	R.SDNK[2444.24]LYR.L	4YM7_2_RPA2	1	RPA2	SDNKLYR	740	126.127	62917.7	127.13	34112.8	67954.8	30906.4	0.454808	2.19873	1.13667
				1534	-76.8928	JL033021_040221_RPA2HFH_Q2_1to10_100B.13343.13343.3	P	4.34625	0.1883	0.274	//15	10//71	3.79375	0.789474	R.GFGYGTM[147.04]YK[1160.62]TEKVDLALNR.N	4YM7_2_RPA2	1	RPA2	GFGYGTMYKTEKVDLALNR	805	//9	3//24	0.5525	0.571429	R.SDNK[2444.24]LYR.L	4YM7_2_RPA2	1	RPA2	SDNKLYR	740	126.127	9591.29	127.13	68487.1	9844.42	72528.5	7.36748	0.135732	-2.88117
				-141	32.6333	JL033021_040221_RPA2HFH_Q2_1to2_100B.13258.13258.6	P	4.31875	0.178645	0.049	//15	10//143	3.84375	0.710526	R.GFGYGTM[147.04]YK[1160.62]TEKVDLALNR.N	4YM7_2_RPA2	1	RPA2	GFGYGTMYKTEKVDLALNR	805	//9	2//38	0.475	0.285714	R.SDNK[2444.24]LYR.L	4YM7_2_RPA2	1	RPA2	SDNKLYR	740	126.127	25624.7	127.13	46456.7	27411.4	47481.7	1.73219	0.577304	-0.792597
				0	2.17008	JL033021_040221_RPA2HFH_Q2_2to1_100B.10026.10026.5	N	4.12075	0.165369		//9	4//35	0.9715	0.75	R.SDNK[1803.9]LYR.L	4YM7_2_RPA2	1	RPA2	SDNKLYR	740	//14	15//77	3.14925	1.72727	R.GFGYGTM[147.04]YK[1301.72]TEK.V	4YM7_2_RPA2	1	RPA2	GFGYGTMYKTEK	805	126.127	110466	127.131	61575.5	119296	56066.4	0.469978	2.12776	1.08934
				-142	37.1198	JL033021_040221_RPA2HFH_Q2_1to5_100B.13600.13600.6	P	3.7505	0.168721	0.0113	//15	8//143	3.4065	0.657895	R.GFGYGTM[147.04]YK[1160.62]TEKVDLALNR.N	4YM7_2_RPA2	1	RPA2	GFGYGTMYKTEKVDLALNR	805	//9	2//38	0.344	0.285714	R.SDNK[2444.24]LYR.L	4YM7_2_RPA2	1	RPA2	SDNKLYR	740	126.127	10101.9	127.13	32891.5	10687.7	34339.1	3.21294	0.311241	-1.6839
				-141	41.9148	JL033021_040221_RPA2HFH_Q2_1to5_50B.09922.09922.3	P	2.9335	0.0878136	0.00178	//14	9//50	2.421	1.04167	R.GFGYGTM[147.04]YK[1160.62]TEK.V	4YM7_2_RPA2	1	RPA2	GFGYGTMYKTEK	805	//9	3//25	0.5125	0.571429	R.SDNK[1662.8]LYR.L	4YM7_2_RPA2	1	RPA2	SDNKLYR	740	126.127	166899	127.13	689288	175390	723645	4.12591	0.242371	-2.04471
				-141	43.2717	JL033021_040221_RPA2HFH_Q2_1to10_50B.09990.09990.3	P	2.752	0.081623	0.00419	//14	9//50	2.289	1.04167	R.GFGYGTM[147.04]YK[1160.62]TEK.V	4YM7_2_RPA2	1	RPA2	GFGYGTMYKTEK	805	//9	3//25	0.463	0.571429	R.SDNK[1662.8]LYR.L	4YM7_2_RPA2	1	RPA2	SDNKLYR	740	126.127	104662	127.13	743816	107453	787664	7.33032	0.13642	-2.87388
				-141	42.3671	JL033021_040221_RPA2HFH_Q2_5to1_50B.10112.10112.3	P	2.658	0.0801302	0.000179	//14	10//50	2.233	1.08333	R.GFGYGTM[147.04]YK[1160.62]TEK.V	4YM7_2_RPA2	1	RPA2	GFGYGTMYKTEK	805	//9	3//25	0.425	0.571429	R.SDNK[1662.8]LYR.L	4YM7_2_RPA2	1	RPA2	SDNKLYR	740	126.127	342964	127.13	97437.2	371141	73623	0.198369	5.0411	2.33374
				-141	42.6326	JL033021_040221_RPA2HFH_Q2_1to5_50B.09912.09912.5	NP	2.652	0.0943218	0.503	//14	6//86	1.2455	0.666667	R.GFGYGTM[147.04]YK[1160.62]TEK.V	4YM7_2_RPA2	1	RPA2	GFGYGTMYKTEK	805	//9	5//39	1.4065	0.857143	R.SDNK[1662.8]LYR.L	4YM7_2_RPA2	1	RPA2	SDNKLYR	740	126.127	97077.9	127.13	391554	102093	410867	4.02443	0.248483	-2.00878
				-141	41.6275	JL033021_040221_RPA2HFH_Q2_1to2_1ug.10190.10190.5	NP	2.64325	0.0948047	0.171	//14	7//86	1.19925	0.708333	R.GFGYGTM[147.04]YK[1160.62]TEK.V	4YM7_2_RPA2	1	RPA2	GFGYGTMYKTEK	805	//9	6//39	1.444	0.928571	R.SDNK[1662.8]LYR.L	4YM7_2_RPA2	1	RPA2	SDNKLYR	740	126.127	93384.1	127.13	153377	100025	155972	1.55934	0.641298	-0.640932
				-141	41.6275	JL033021_040221_RPA2HFH_Q2_2to1_1ug.10182.10182.5	NP	2.62475	0.0984767	0.00066	//14	6//86	1.1675	0.666667	R.GFGYGTM[147.04]YK[1160.62]TEK.V	4YM7_2_RPA2	1	RPA2	GFGYGTMYKTEK	805	//9	6//39	1.45725	0.928571	R.SDNK[1662.8]LYR.L	4YM7_2_RPA2	1	RPA2	SDNKLYR	740	126.127	274319	127.13	138986	296360	124308	0.41945	2.38408	1.25343
				-141	42.0044	JL033021_040221_RPA2HFH_Q2_1to10_50B.09977.09977.5	NP	2.597	0.0931743	0.127	//14	7//86	1.204	0.708333	R.GFGYGTM[147.04]YK[1160.62]TEK.V	4YM7_2_RPA2	1	RPA2	GFGYGTMYKTEK	805	//9	5//39	1.393	0.857143	R.SDNK[1662.8]LYR.L	4YM7_2_RPA2	1	RPA2	SDNKLYR	740	126.127	53106.7	127.13	359424	54669.2	380384	6.95792	0.143721	-2.79866
				-141	43.3667	JL033021_040221_RPA2HFH_Q2_2to1_50B.09410.09410.4	P	2.58825	0.0797452	0.0764	//14	8//68	1.97675	0.875	R.GFGYGTM[147.04]YK[1160.62]TEK.V	4YM7_2_RPA2	1	RPA2	GFGYGTMYKTEK	805	//9	4//32	0.6115	0.642857	R.SDNK[1662.8]LYR.L	4YM7_2_RPA2	1	RPA2	SDNKLYR	740	126.127	750416	127.13	420392	810383	383117	0.47276	2.11524	1.08082
				-141	41.8788	JL033021_040221_RPA2HFH_Q2_1to5_1ug.10194.10194.5	NP	2.5445	0.0910148	6e-06	//14	6//86	1.0705	0.541667	R.GFGYGTM[147.04]YK[1160.62]TEK.V	4YM7_2_RPA2	1	RPA2	GFGYGTMYKTEK	805	//9	6//39	1.474	0.928571	R.SDNK[1662.8]LYR.L	4YM7_2_RPA2	1	RPA2	SDNKLYR	740	126.127	64622.9	127.13	258528	67978.8	271232	3.98996	0.250629	-1.99637
				-141	40.8737	JL033021_040221_RPA2HFH_Q2_1to2_50B.09728.09728.5	NP	2.49175	0.088509	0.0325	//14	6//86	1.09025	0.541667	R.GFGYGTM[147.04]YK[1160.62]TEK.V	4YM7_2_RPA2	1	RPA2	GFGYGTMYKTEK	805	//9	5//39	1.4015	0.857143	R.SDNK[1662.8]LYR.L	4YM7_2_RPA2	1	RPA2	SDNKLYR	740	126.127	131364	127.13	225336	140628	229673	1.6332	0.612296	-0.707699
				-141	42.5069	JL033021_040221_RPA2HFH_Q2_2to1_50B.09413.09413.5	NP	2.4445	0.0938154	0.101	//14	5//86	1.0555	0.5	R.GFGYGTM[147.04]YK[1160.62]TEK.V	4YM7_2_RPA2	1	RPA2	GFGYGTMYKTEK	805	//9	5//39	1.389	0.857143	R.SDNK[1662.8]LYR.L	4YM7_2_RPA2	1	RPA2	SDNKLYR	740	126.127	395947	127.131	204426	427729	183514	0.429042	2.33077	1.22081
				-141	43.3863	JL033021_040221_RPA2HFH_Q2_10to1_1ug.10096.10096.5	NP	2.38025	0.0922363	0.109	//14	6//86	0.95125	0.541667	R.GFGYGTM[147.04]YK[1160.62]TEK.V	4YM7_2_RPA2	1	RPA2	GFGYGTMYKTEK	805	//9	5//39	1.429	0.857143	R.SDNK[1662.8]LYR.L	4YM7_2_RPA2	1	RPA2	SDNKLYR	740	126.127	199185	127.13	35263.5	215724	19906.3	0.0922767	10.837	3.43789
				-141	41.7641	JL033021_040221_RPA2HFH_Q2_2to1_50B.09411.09411.3	P	2.228	0.0633404	0.338	//14	8//50	1.7145	0.875	R.GFGYGTM[147.04]YK[1160.62]TEK.V	4YM7_2_RPA2	1	RPA2	GFGYGTMYKTEK	805	//9	3//25	0.5135	0.571429	R.SDNK[1662.8]LYR.L	4YM7_2_RPA2	1	RPA2	SDNKLYR	740	126.128	533913	127.131	289204	576660	261975	0.454297	2.2012	1.13829
				-141	42.7582	JL033021_040221_RPA2HFH_Q2_1to1_1ug.10105.10105.5	P	2.1965	0.0744955	0.14	//14	5//86	0.6855	0.291667	R.GFGYGTM[147.04]YK[1160.62]TEK.V	4YM7_2_RPA2	1	RPA2	GFGYGTMYKTEK	805	//9	6//39	1.511	0.928571	R.SDNK[1662.8]LYR.L	4YM7_2_RPA2	1	RPA2	SDNKLYR	740	126.127	111151	127.13	105916	119679	103519	0.864976	1.1561	0.209267
				-141	44.2658	JL033021_040221_RPA2HFH_Q2_1to2_100B.09962.09962.5	P	2.1695	0.0941133	0.000299	//14	5//86	0.775	0.5	R.GFGYGTM[147.04]YK[1160.62]TEK.V	4YM7_2_RPA2	1	RPA2	GFGYGTMYKTEK	805	//9	5//39	1.3945	0.714286	R.SDNK[1662.8]LYR.L	4YM7_2_RPA2	1	RPA2	SDNKLYR	740	126.127	45852.3	127.13	75251.9	49113.4	76522.3	1.55807	0.641818	-0.639764
				1386	99.3156	JL033021_040221_RPA2HFH_Q2_1to10_1ug.14122.14122.3	P	2.157	0.0669949	0.633	//15	9//71	1.46725	0.578947	R.GFGYGTM[147.04]YK[1160.62]TEKVDLALNR.N	4YM7_2_RPA2	1	RPA2	GFGYGTMYKTEKVDLALNR	805	//9	4//24	0.68975	0.642857	R.SDNK[2444.24]LYR.L	4YM7_2_RPA2	1	RPA2	SDNKLYR	740	126.127	14972.7	127.131	111848	15327.7	118510	7.73176	0.129337	-2.9508
				-141	41.9902	JL033021_040221_RPA2HFH_Q2_5to1_1ug.10157.10157.3	P	2.14875	0.0630567	0.00245	//14	8//50	1.7705	1	R.GFGYGTM[147.04]YK[1160.62]TEK.V	4YM7_2_RPA2	1	RPA2	GFGYGTMYKTEK	805	1//9	4//25	0.37825	0.642857	R.SDNK[1662.8]LYR.L	4YM7_2_RPA2	1	RPA2	SDNKLYR	740	126.127	163697	127.13	41876.6	177184	30178.7	0.170324	5.87117	2.55365
				-141	45.0807	JL033021_040221_RPA2HFH_Q2_2to1_1ug.10179.10179.3	P	2.1205	0.0661715	0.0644	//14	9//50	1.71725	1.04167	R.GFGYGTM[147.04]YK[1160.62]TEK.V	4YM7_2_RPA2	1	RPA2	GFGYGTMYKTEK	805	//9	4//25	0.40325	0.642857	R.SDNK[1662.8]LYR.L	4YM7_2_RPA2	1	RPA2	SDNKLYR	740	126.127	140328	127.13	75045.4	151571	67819.6	0.447443	2.23492	1.16022
				-141	43.1351	JL033021_040221_RPA2HFH_Q2_1to1_50B.10177.10177.5	P	2.11225	0.072485	0.000286	//14	5//86	0.61175	0.291667	R.GFGYGTM[147.04]YK[1160.62]TEK.V	4YM7_2_RPA2	1	RPA2	GFGYGTMYKTEK	805	//9	5//39	1.5005	0.857143	R.SDNK[1662.8]LYR.L	4YM7_2_RPA2	1	RPA2	SDNKLYR	740	126.127	83204.5	127.13	77266.8	89604.3	75328.2	0.840676	1.18952	0.250378
				-141	40.2456	JL033021_040221_RPA2HFH_Q2_1to10_1ug.10201.10201.5	P	2.08075	0.075599	0.00671	//14	5//86	0.6325	0.291667	R.GFGYGTM[147.04]YK[1160.62]TEK.V	4YM7_2_RPA2	1	RPA2	GFGYGTMYKTEK	805	//9	6//39	1.44825	0.928571	R.SDNK[1662.8]LYR.L	4YM7_2_RPA2	1	RPA2	SDNKLYR	740	126.127	27735.2	127.13	175801	28648.1	185895	6.48892	0.154109	-2.69798
				-141	43.512	JL033021_040221_RPA2HFH_Q2_5to1_50B.10092.10092.5	P	2.038	0.0737497	0.00294	//14	5//86	0.6465	0.291667	R.GFGYGTM[147.04]YK[1160.62]TEK.V	4YM7_2_RPA2	1	RPA2	GFGYGTMYKTEK	805	//9	5//39	1.3915	0.857143	R.SDNK[1662.8]LYR.L	4YM7_2_RPA2	1	RPA2	SDNKLYR	740	126.127	161591	127.13	39584.3	174919	27911.3	0.159567	6.26696	2.64776
				-141	37.0906	JL033021_040221_RPA2HFH_Q2_1to1_50B.10186.10186.3	P	2.03075	0.0641303	8.66e-06	//14	9//50	1.59525	0.791667	R.GFGYGTM[147.04]YK[1160.62]TEK.V	4YM7_2_RPA2	1	RPA2	GFGYGTMYKTEK	805	//9	3//25	0.4355	0.571429	R.SDNK[1662.8]LYR.L	4YM7_2_RPA2	1	RPA2	SDNKLYR	740	126.127	75726.3	127.13	79579.6	81475.6	78477.8	0.963207	1.0382	0.0540824
				-141	42.3813	JL033021_040221_RPA2HFH_Q2_1to10_100B.10029.10029.5	NP	2.019	0.0846151	0.00599	//14	5//86	0.9205	0.5	R.GFGYGTM[147.04]YK[1160.62]TEK.V	4YM7_2_RPA2	1	RPA2	GFGYGTMYKTEK	805	1//9	5//39	1.0985	0.714286	R.SDNK[1662.8]LYR.L	4YM7_2_RPA2	1	RPA2	SDNKLYR	740	126.127	14403.7	127.131	94464.7	14852.1	99933.6	6.7286	0.148619	-2.75031
				-141	41.1556	JL033021_040221_RPA2HFH_Q2_1to10_50B.09976.09976.4	P	2.0065	0.0645249	0.00563	//14	8//68	1.57425	0.875	R.GFGYGTM[147.04]YK[1160.62]TEK.V	4YM7_2_RPA2	1	RPA2	GFGYGTMYKTEK	805	//9	4//32	0.43225	0.642857	R.SDNK[1662.8]LYR.L	4YM7_2_RPA2	1	RPA2	SDNKLYR	740	126.127	90284.2	127.13	699458	92221.4	741421	8.03958	0.124385	-3.00712
				-141	41.9596	JL033021_040221_RPA2HFH_Q2_1to5_50B.09911.09911.4	P	1.9465	0.0632638	0.0103	//14	7//68	1.56525	0.708333	R.GFGYGTM[147.04]YK[1160.62]TEK.V	4YM7_2_RPA2	1	RPA2	GFGYGTMYKTEK	805	//9	4//32	0.38125	0.642857	R.SDNK[1662.8]LYR.L	4YM7_2_RPA2	1	RPA2	SDNKLYR	740	126.127	158884	127.13	666174	166887	699596	4.19204	0.238548	-2.06765
				-141	40.8541	JL033021_040221_RPA2HFH_Q2_1to2_50B.09726.09726.4	P	1.94	0.0605947	0.0725	//14	7//68	1.529	0.708333	R.GFGYGTM[147.04]YK[1160.62]TEK.V	4YM7_2_RPA2	1	RPA2	GFGYGTMYKTEK	805	//9	4//32	0.411	0.642857	R.SDNK[1662.8]LYR.L	4YM7_2_RPA2	1	RPA2	SDNKLYR	740	126.127	220708	127.13	401572	236085	410504	1.7388	0.57511	-0.79809
				-141	41.538	JL033021_040221_RPA2HFH_Q2_5to1_50B.10098.10098.3	P	1.917	0.0583615	0.0438	//14	8//50	1.5965	0.875	R.GFGYGTM[147.04]YK[1160.62]TEK.V	4YM7_2_RPA2	1	RPA2	GFGYGTMYKTEK	805	//9	3//25	0.3205	0.571429	R.SDNK[1662.8]LYR.L	4YM7_2_RPA2	1	RPA2	SDNKLYR	740	126.127	142240	127.13	39851.8	153931	29935.2	0.194471	5.14216	2.36237
				-141	43.6376	JL033021_040221_RPA2HFH_Q2_10to1_50B.10132.10132.5	P	1.91625	0.0720611	2.26e-05	//14	4//86	0.55525	0.25	R.GFGYGTM[147.04]YK[1160.62]TEK.V	4YM7_2_RPA2	1	RPA2	GFGYGTMYKTEK	805	//9	5//39	1.361	0.857143	R.SDNK[1662.8]LYR.L	4YM7_2_RPA2	1	RPA2	SDNKLYR	740	126.128	184363	127.131	30858.4	199685	16516.5	0.0827127	12.09	3.59575
				-141	44.0145	JL033021_040221_RPA2HFH_Q2_1to1_100B.10041.10041.5	P	1.895	0.0808551	0.0277	//14	5//86	0.577	0.291667	R.GFGYGTM[147.04]YK[1160.62]TEK.V	4YM7_2_RPA2	1	RPA2	GFGYGTMYKTEK	805	1//9	5//39	1.318	0.714286	R.SDNK[1662.8]LYR.L	4YM7_2_RPA2	1	RPA2	SDNKLYR	740	126.127	49564.5	127.13	48322.2	53358.2	47331.7	0.887056	1.12732	0.172903
				-143	35.5609	JL033021_040221_RPA2HFH_Q2_1to2_100B.13329.13329.6	P	1.849	0.0757709	0.653	//15	9//143	1.431	0.368421	R.GFGYGTM[147.04]YK[1160.62]TEKVDLALNR.N	4YM7_2_RPA2	1	RPA2	GFGYGTMYKTEKVDLALNR	805	//9	2//38	0.418	0.285714	R.SDNK[2444.24]LYR.L	4YM7_2_RPA2	1	RPA2	SDNKLYR	740	126.127	27267.3	127.13	51784.8	29149.3	53043.8	1.81973	0.549533	-0.863723
				-143	37.7188	JL033021_040221_RPA2HFH_Q2_10to1_1ug.10119.10119.3	P	1.84025	0.0472531	0.606	//14	7//50	1.476	0.833333	R.GFGYGTM[147.04]YK[1160.62]TEK.V	4YM7_2_RPA2	1	RPA2	GFGYGTMYKTEK	805	//9	4//25	0.36425	0.642857	R.SDNK[1662.8]LYR.L	4YM7_2_RPA2	1	RPA2	SDNKLYR	740	126.127	192915	127.13	37848.5	208902	23239.3	0.111245	8.98919	3.16819
				-141	41.2561	JL033021_040221_RPA2HFH_Q2_2to1_1ug.10155.10155.4	P	1.76	0.0563326	0.0376	//14	8//68	1.4685	0.875	R.GFGYGTM[147.04]YK[1160.62]TEK.V	4YM7_2_RPA2	1	RPA2	GFGYGTMYKTEK	805	//9	3//32	0.2915	0.571429	R.SDNK[1662.8]LYR.L	4YM7_2_RPA2	1	RPA2	SDNKLYR	740	126.127	232640	127.13	124054	251282	112049	0.445908	2.24262	1.16518
				-141	39.7431	JL033021_040221_RPA2HFH_Q2_5to1_1ug.10132.10132.5	P	1.67975	0.0605119	0.00317	//14	5//86	0.59325	0.291667	R.GFGYGTM[147.04]YK[1160.62]TEK.V	4YM7_2_RPA2	1	RPA2	GFGYGTMYKTEK	805	//9	5//39	1.0865	0.857143	R.SDNK[1662.8]LYR.L	4YM7_2_RPA2	1	RPA2	SDNKLYR	740	126.128	184927	127.131	44800	200184	31405.5	0.156883	6.37416	2.67224
				-141	41.9596	JL033021_040221_RPA2HFH_Q2_1to10_1ug.10212.10212.4	P	1.6745	0.0551058	0.00999	//14	7//68	1.3335	0.708333	R.GFGYGTM[147.04]YK[1160.62]TEK.V	4YM7_2_RPA2	1	RPA2	GFGYGTMYKTEK	805	//9	3//32	0.341	0.571429	R.SDNK[1662.8]LYR.L	4YM7_2_RPA2	1	RPA2	SDNKLYR	740	126.127	42121.8	127.13	330266	42993.6	350125	8.14367	0.122795	-3.02568
				-141	42.4425	JL033021_040221_RPA2HFH_Q2_1to2_50B.09727.09727.3	P	1.64975	0.0466611	0.285	//14	7//50	1.30925	0.708333	R.GFGYGTM[147.04]YK[1160.62]TEK.V	4YM7_2_RPA2	1	RPA2	GFGYGTMYKTEK	805	//9	3//25	0.3405	0.571429	R.SDNK[1662.8]LYR.L	4YM7_2_RPA2	1	RPA2	SDNKLYR	740	126.127	127536	127.13	208108	136616	211556	1.54855	0.645767	-0.630915
				-141	41.0551	JL033021_040221_RPA2HFH_Q2_5to1_50B.10097.10097.4	P	1.6185	0.049973	0.000941	//14	8//68	1.4625	0.75	R.GFGYGTM[147.04]YK[1160.62]TEK.V	4YM7_2_RPA2	1	RPA2	GFGYGTMYKTEK	805	//9	3//32	0.156	0.357143	R.SDNK[1662.8]LYR.L	4YM7_2_RPA2	1	RPA2	SDNKLYR	740	126.127	264894	127.13	76237.3	286649	57914.2	0.202039	4.94954	2.3073
				-141	42.3813	JL033021_040221_RPA2HFH_Q2_5to1_100B.10070.10070.5	P	1.56025	0.0748232	0.209	//14	5//86	0.8335	0.5	R.GFGYGTM[147.04]YK[1160.62]TEK.V	4YM7_2_RPA2	1	RPA2	GFGYGTMYKTEK	805	//9	3//39	0.72675	0.357143	R.SDNK[1662.8]LYR.L	4YM7_2_RPA2	1	RPA2	SDNKLYR	740	126.128	108312	127.131	29205.2	117223	21572.3	0.184028	5.43397	2.44201
				-141	38.844	JL033021_040221_RPA2HFH_Q2_1to2_50B.09719.09719.4	P	1.5255	0.0484378	0.131	//14	7//68	1.26825	0.708333	R.GFGYGTM[147.04]YK[1160.62]TEK.V	4YM7_2_RPA2	1	RPA2	GFGYGTMYKTEK	805	//9	4//32	0.25725	0.642857	R.SDNK[1662.8]LYR.L	4YM7_2_RPA2	1	RPA2	SDNKLYR	740	126.127	133877	127.13	227892	143332	232186	1.61992	0.617313	-0.695926
				-141	40.7536	JL033021_040221_RPA2HFH_Q2_1to5_1ug.10170.10170.4	P	1.5085	0.0458371	7.37e-05	//14	8//68	1.283	0.75	R.GFGYGTM[147.04]YK[1160.62]TEK.V	4YM7_2_RPA2	1	RPA2	GFGYGTMYKTEK	805	//9	4//32	0.2255	0.642857	R.SDNK[1662.8]LYR.L	4YM7_2_RPA2	1	RPA2	SDNKLYR	740	126.127	45034.9	127.13	182127	47357.7	191121	4.03569	0.247789	-2.01282
				-142	43.1711	JL033021_040221_RPA2HFH_Q2_1to10_1ug.10206.10206.3	P	1.5055	0.044254	0.588	1//14	7//50	1.1435	0.583333	R.GFGYGTM[147.04]YK[1160.62]TEK.V	4YM7_2_RPA2	1	RPA2	GFGYGTMYKTEK	805	//9	3//25	0.362	0.571429	R.SDNK[1662.8]LYR.L	4YM7_2_RPA2	1	RPA2	SDNKLYR	740	126.127	16868.8	127.13	117110	17341.1	123978	7.14938	0.139872	-2.83782
				-141	39.9943	JL033021_040221_RPA2HFH_Q2_1to5_100B.10111.10111.5	P	1.4535	0.062948	0.000717	//14	5//86	0.511	0.291667	R.GFGYGTM[147.04]YK[1160.62]TEK.V	4YM7_2_RPA2	1	RPA2	GFGYGTMYKTEK	805	//9	4//39	0.9425	0.642857	R.SDNK[1662.8]LYR.L	4YM7_2_RPA2	1	RPA2	SDNKLYR	740	126.127	21274.7	127.13	74140.6	22468.8	77537.8	3.45092	0.289778	-1.78698
				-141	40.5526	JL033021_040221_RPA2HFH_Q2_1to1_1ug.10104.10104.4	P	1.40825	0.0456409	0.111	//14	7//68	1.2005	0.708333	R.GFGYGTM[147.04]YK[1160.62]TEK.V	4YM7_2_RPA2	1	RPA2	GFGYGTMYKTEK	805	//9	4//32	0.20775	0.642857	R.SDNK[1662.8]LYR.L	4YM7_2_RPA2	1	RPA2	SDNKLYR	740	126.127	131168	127.13	140899	141101	139210	0.986595	1.01359	0.0194695
				-141	42.1606	JL033021_040221_RPA2HFH_Q2_5to1_1ug.10130.10130.4	P	1.3755	0.0433481	6.76e-05	//14	7//68	1.23575	0.708333	R.GFGYGTM[147.04]YK[1160.62]TEK.V	4YM7_2_RPA2	1	RPA2	GFGYGTMYKTEK	805	//9	3//32	0.13975	0.357143	R.SDNK[1662.8]LYR.L	4YM7_2_RPA2	1	RPA2	SDNKLYR	740	126.127	263903	127.13	72903.4	285602	54430.6	0.190582	5.24708	2.39152
				-141	42.1606	JL033021_040221_RPA2HFH_Q2_1to1_50B.10169.10169.4	P	1.2775	0.0391121	0.0143	//14	6//68	1.2415	0.666667	R.GFGYGTM[147.04]YK[1160.62]TEK.V	4YM7_2_RPA2	1	RPA2	GFGYGTMYKTEK	805	//9	1//32	0.036	0.0714286	R.SDNK[1662.8]LYR.L	4YM7_2_RPA2	1	RPA2	SDNKLYR	740	126.127	72599.6	127.13	77988.1	78097.7	77053.2	0.986625	1.01356	0.0194256
				-141	40.1811	JL033021_040221_RPA2HFH_Q2_1to1_100B.10057.10057.3	P	1.252	0.0406026	0.201	//14	5//50	1.1925	0.541667	R.GFGYGTM[147.04]YK[1160.62]TEK.V	4YM7_2_RPA2	1	RPA2	GFGYGTMYKTEK	805	//9	1//25	0.0595	0.0714286	R.SDNK[1662.8]LYR.L	4YM7_2_RPA2	1	RPA2	SDNKLYR	740	126.127	46421.3	127.13	47676.6	49954.7	46922	0.93929	1.06463	0.0903569
				-141	42.7637	JL033021_040221_RPA2HFH_Q2_1to2_50B.09882.09882.4	P	1.05125	0.0342745	0.29	//14	6//68	0.88725	0.541667	R.GFGYGTM[147.04]YK[1160.62]TEK.V	4YM7_2_RPA2	1	RPA2	GFGYGTMYKTEK	805	//9	3//32	0.164	0.571429	R.SDNK[1662.8]LYR.L	4YM7_2_RPA2	1	RPA2	SDNKLYR	740	126.127	106212	127.13	184532	113682	188206	1.65554	0.604032	-0.727304
				-141	40.8737	JL033021_040221_RPA2HFH_Q2_1to1_100B.10213.10213.5	P	0.9925	0.0427968	0.316	//14	6//86	0.8545	0.541667	R.GFGYGTM[147.04]YK[1160.62]TEK.V	4YM7_2_RPA2	1	RPA2	GFGYGTMYKTEK	805	//9	2//39	0.138	0.142857	R.SDNK[1662.8]LYR.L	4YM7_2_RPA2	1	RPA2	SDNKLYR	740	126.127	51479.3	127.131	53223.7	55394.8	52412.1	0.946155	1.05691	0.0798521
				-141	42.2557	JL033021_040221_RPA2HFH_Q2_10to1_100B.10020.10020.5	P	0.88775	0.0405689	0.297	//14	5//86	0.56275	0.291667	R.GFGYGTM[147.04]YK[1160.62]TEK.V	4YM7_2_RPA2	1	RPA2	GFGYGTMYKTEK	805	//9	3//39	0.325	0.357143	R.SDNK[1662.8]LYR.L	4YM7_2_RPA2	1	RPA2	SDNKLYR	740	126.127	89924.9	127.131	15864.8	97391.8	8927.63	0.0916671	10.909	3.44745
				-141	43.8747	JL033021_040221_RPA2HFH_Q2_1to2_1ug.10197.10197.3	P	0.86425	0.0251543	0.134	//14	5//50	0.799	0.416667	R.GFGYGTM[147.04]YK[1160.62]TEK.V	4YM7_2_RPA2	1	RPA2	GFGYGTMYKTEK	805	//9	1//25	0.06525	0.0714286	R.SDNK[1662.8]LYR.L	4YM7_2_RPA2	1	RPA2	SDNKLYR	740	126.126	46159.1	127.129	91817.1	49311.3	94245.7	1.91124	0.523221	-0.934509
				-141	43.9697	JL033021_040221_RPA2HFH_Q2_5to1_1ug.10220.10220.4	P	0.76675	0.0242819	0.159	//14	5//68	0.7225	0.5	R.GFGYGTM[147.04]YK[1160.62]TEK.V	4YM7_2_RPA2	1	RPA2	GFGYGTMYKTEK	805	//9	1//32	0.04425	0.0714286	R.SDNK[1662.8]LYR.L	4YM7_2_RPA2	1	RPA2	SDNKLYR	740	126.127	139778	127.13	36797.5	151286	26883.3	0.177698	5.62751	2.4925
				-141	40.8541	JL033021_040221_RPA2HFH_Q2_10to1_100B.10019.10019.4	P	0.72825	0.0251151	0.52	//14	6//68	0.65625	0.416667	R.GFGYGTM[147.04]YK[1160.62]TEK.V	4YM7_2_RPA2	1	RPA2	GFGYGTMYKTEK	805	//9	2//32	0.072	0.142857	R.SDNK[1662.8]LYR.L	4YM7_2_RPA2	1	RPA2	SDNKLYR	740	126.127	99130.6	127.13	19186.2	107348	11660.4	0.108622	9.20623	3.20261
				-141	39.9495	JL033021_040221_RPA2HFH_Q2_1to1_50B.10340.10340.4	P	0.695	0.0222928	0.625	//14	5//68	0.6525	0.5	R.GFGYGTM[147.04]YK[1160.62]TEK.V	4YM7_2_RPA2	1	RPA2	GFGYGTMYKTEK	805	//9	1//32	0.0425	0.0714286	R.SDNK[1662.8]LYR.L	4YM7_2_RPA2	1	RPA2	SDNKLYR	740	126.127	65901.1	127.131	65869.4	70932	64668.3	0.911695	1.09686	0.133378
				-141	44.6732	JL033021_040221_RPA2HFH_Q2_2to1_1ug.10235.10235.4	P	0.6725	0.0209104	0.326	//14	5//68	0.625	0.375	R.GFGYGTM[147.04]YK[1160.62]TEK.V	4YM7_2_RPA2	1	RPA2	GFGYGTMYKTEK	805	//9	2//32	0.0475	0.142857	R.SDNK[1662.8]LYR.L	4YM7_2_RPA2	1	RPA2	SDNKLYR	740	126.127	126744	127.13	68261.5	136895	61769.7	0.45122	2.21621	1.1481
	35	RPA2:120---RPA2:136	0.71125
				-438	134.978	JL033021_040221_RPA2HFH_Q2_2to1_100B.12256.12256.4	P	0.71125	0.0323568	0.278	//8	3//40	0.11425	0.1875	R.GK[1230.66]LLLKLK.W	4YM7_2_RPA2	1	RPA2	GKLLLKLK	136	//9	4//44	0.597	0.375	R.K[1177.82]VYPSESR.Q	4YM7_2_RPA2	1	RPA2	KVYPSESR	120	126.126	92358	127.13	44819.1	99794.9	39736.1	0.398178	2.51144	1.32851
				-439	142.008	JL033021_040221_RPA2HFH_Q2_10to1_100B.12446.12446.4	P	0.32975	0.0151724	0.44	//8	2//40	0.103	0.125	R.GK[1230.66]LLLKLK.W	4YM7_2_RPA2	1	RPA2	GKLLLKLK	136	//9	3//44	0.22675	0.1875	R.K[1177.82]VYPSESR.Q	4YM7_2_RPA2	1	RPA2	KVYPSESR	120	126.127	65468.5	127.13	11730.9	70903.1	6693.35	0.0944014	10.5931	3.40505
	36	RPA2:120---RPA2:140	0.615
				-141	57.9337	JL033021_040221_RPA2HFH_Q2_1to1_50B.11393.11393.3	P	0.615	0.0242905	0.265	//9	3//36	0.36775	0.3125	R.K[992.7]VYPSESR.Q	4YM7_2_RPA2	1	RPA2	KVYPSESR	120	//8	3//24	0.24725	0.416667	K.LLLK[1230.66]LK.W	4YM7_2_RPA2	1	RPA2	LLLKLK	140	126.127	49939.9	127.13	42799.2	53810.2	41379.6	0.768991	1.3004	0.378961
	37	RPA2:120---RPA2:6	4.37275
				-1	3.47653	JL033021_040221_RPA2HFH_Q2_5to1_50B.07144.07144.4	N	4.37275	0.191481		//9	8//42	3.059	1.5	R.K[1371.84]VYPSESR.Q	4YM7_2_RPA2	1	RPA2	KVYPSESR	120	//11	7//43	1.31375	0.75	K.VIK[1371.75]PPGQAR.T	4YM7_2_RPA2	1	RPA2	VIKPPGQAR	6	126.127	73717.4	127.131	18245	79795.8	12933.2	0.162078	6.16985	2.62524
				-142	44.0472	JL033021_040221_RPA2HFH_Q2_1to1_50B.07289.07289.4	NP	2.54075	0.105001	1.67e-09	//11	5//47	0.97075	0.555556	K.VIK[1230.66]PPGQAR.T	4YM7_2_RPA2	1	RPA2	VIKPPGQAR	6	//9	5//45	1.57	1	R.K[1230.74]VYPSESR.Q	4YM7_2_RPA2	1	RPA2	KVYPSESR	120	126.127	38465.5	127.13	32023.5	41454.2	30862.6	0.7445	1.34318	0.425656
				-141	46.9998	JL033021_040221_RPA2HFH_Q2_5to1_50B.07155.07155.4	NP	2.51725	0.104587	0.00317	//11	6//47	0.93575	0.611111	K.VIK[1230.66]PPGQAR.T	4YM7_2_RPA2	1	RPA2	VIKPPGQAR	6	//9	6//45	1.5815	1.25	R.K[1230.74]VYPSESR.Q	4YM7_2_RPA2	1	RPA2	KVYPSESR	120	126.127	82031.4	127.13	20885.5	88790.7	15016.3	0.169121	5.91294	2.56388
	38	RPA2:120---RPA2:441	3.62625
				0	0.256478	JL033021_040221_RPA2HFH_Q2_5to1_100B.07912.07912.4	N	3.62625	0.172707		//9	6//40	1.8605	0.75	R.K[1601.88]VYPSESR.Q	4YM7_2_RPA2	1	RPA2	KVYPSESR	120	1//12	8//47	1.76575	0.944444	R.GM[147.04]AINFK[1371.76]DKR.Y	4YM7_2_RPA2	1	RPA2	GMAINFKDKR	441	126.127	55019.6	127.13	12952.2	59561.7	8940.11	0.150098	6.6623	2.73602
				-142	46.5488	JL033021_040221_RPA2HFH_Q2_5to1_100B.07889.07889.4	NP	2.217	0.112057	0.118	//12	4//56	0.5795	0.4	R.GM[147.04]AINFK[1230.66]DKR.Y	4YM7_2_RPA2	1	RPA2	GMAINFKDKR	441	//9	6//43	1.6375	1.25	R.K[1460.78]VYPSESR.Q	4YM7_2_RPA2	1	RPA2	KVYPSESR	120	126.127	58930.3	127.13	13734.3	63796.3	9427.1	0.147769	6.76734	2.75859
				-141	44.5295	JL033021_040221_RPA2HFH_Q2_1to10_100B.08334.08334.4	NP	2.006	0.10205	0.131	//12	5//56	0.79025	0.45	R.GM[147.04]AINFK[1230.66]DKR.Y	4YM7_2_RPA2	1	RPA2	GMAINFKDKR	441	//9	6//43	1.21575	0.625	R.K[1460.78]VYPSESR.Q	4YM7_2_RPA2	1	RPA2	KVYPSESR	120	126.127	7188.28	127.13	42559.9	7449.31	44961.1	6.03561	0.165683	-2.5935
				-141	46.1237	JL033021_040221_RPA2HFH_Q2_2to1_100B.07887.07887.4	NP	1.6525	0.0739357	0.0474	//12	4//56	0.723	0.4	R.GM[147.04]AINFK[1230.66]DKR.Y	4YM7_2_RPA2	1	RPA2	GMAINFKDKR	441	//9	4//43	0.9295	0.5	R.K[1460.78]VYPSESR.Q	4YM7_2_RPA2	1	RPA2	KVYPSESR	120	126.127	63494.4	127.13	28581.6	68625.2	24927.4	0.36324	2.753	1.46101
				-141	48.2493	JL033021_040221_RPA2HFH_Q2_1to10_100B.08329.08329.4	NP	1.34075	0.0770081	0.0736	//12	4//56	0.46675	0.3	R.GM[147.04]AINFK[1230.66]DKR.Y	4YM7_2_RPA2	1	RPA2	GMAINFKDKR	441	//9	5//43	0.874	0.5625	R.K[1460.78]VYPSESR.Q	4YM7_2_RPA2	1	RPA2	KVYPSESR	120	126.127	7404.11	127.13	40763.7	7697.98	43017	5.58808	0.178952	-2.48235
				-143	44.7421	JL033021_040221_RPA2HFH_Q2_1to1_100B.08100.08100.4	P	1.0295	0.0541173	0.374	//12	4//56	0.3105	0.3	R.GM[147.04]AINFK[1230.66]DKR.Y	4YM7_2_RPA2	1	RPA2	GMAINFKDKR	441	//9	4//43	0.719	0.5	R.K[1460.78]VYPSESR.Q	4YM7_2_RPA2	1	RPA2	KVYPSESR	120	126.127	27683.6	127.13	22756.4	29836.9	21900.2	0.733995	1.36241	0.446158
	39	RPA2:364---RPA2:66	8.5575
				-2	5.28964	JL033021_040221_RPA2HFH_Q2_5to1_1ug.20819.20819.7	N	8.5575	0.198088		//18	8//89	1.95575	0.633333	R.IVLVHLGK[4438.33]DGSQDKFR.M	4YM7_2_RPA2	1	RPA2	IVLVHLGKDGSQDKFR	364	2//15	26//231	6.60175	0.802632	K.SAFPLLQEAVQPHIGSFNALTEGPDGGLLNLGVK[2218.23]DIGEK.V	4YM7_2_RPA2	1	RPA2	SAFPLLQEAVQPHIGSFNALTEGPDGGLLNLGVKDIGEK	66	126.127	61779.9	127.13	15735.4	66870.4	11315.6	0.169216	5.90959	2.56306
				-3	2.6919	JL033021_040221_RPA2HFH_Q2_1to2_1ug.20981.20981.7	N	8.32875	0.202252		//18	13//89	2.7225	0.933333	R.IVLVHLGK[4438.38]DGSQDKFR.M	4YM7_2_RPA2	1	RPA2	IVLVHLGKDGSQDKFR	364	1//15	25//231	5.60625	0.618421	K.SAFPLLQEAVQPHIGSFNALTEGPDGGLLNLGVK[2218.28]DIGEK.V	4YM7_2_RPA2	1	RPA2	SAFPLLQEAVQPHIGSFNALTEGPDGGLLNLGVKDIGEK	66	126.127	35858.5	127.13	54819.5	38441.6	55524.4	1.44438	0.692336	-0.530455
				-3	3.87786	JL033021_040221_RPA2HFH_Q2_1to5_1ug.20911.20911.7	N	7.796	0.181725		//18	11//89	2.08225	0.733333	R.IVLVHLGK[4438.39]DGSQDKFR.M	4YM7_2_RPA2	1	RPA2	IVLVHLGKDGSQDKFR	364	2//15	23//231	5.71375	0.644737	K.SAFPLLQEAVQPHIGSFNALTEGPDGGLLNLGVK[2218.29]DIGEK.V	4YM7_2_RPA2	1	RPA2	SAFPLLQEAVQPHIGSFNALTEGPDGGLLNLGVKDIGEK	66	126.127	14056.6	127.13	52779.8	14814.7	55295.9	3.7325	0.267917	-1.90014
				-142	24.7645	JL033021_040221_RPA2HFH_Q2_5to1_1ug.20874.20874.7	NP	7.295	0.178072	3.74e-09	//13	22//327	4.28425	0.615385	K.SAFPLLQEAVQPHIGSFNALTEGPDGGLLNLGVK[2077.17]DIGEK.V	4YM7_2_RPA2	1	RPA2	SAFPLLQEAVQPHIGSFNALTEGPDGGLLNLGVKDIGEK	66	//17	12//120	3.01075	1.03125	R.IVLVHLGK[4297.26]DGSQDKFR.M	4YM7_2_RPA2	1	RPA2	IVLVHLGKDGSQDKFR	364	126.127	66784.9	127.13	17434.5	72284.4	12687	0.175516	5.6975	2.51033
6	RPA34
	1	RPA34:152---RPA34:158	3.98775
				0	1.40149	JL033021_040221_RPA2HFH_Q2_1to10_50B.10384.10384.4	N	3.98775	0.196843		1//6	6//26	1.19875	1.1	R.K[1567.92]DVPK.V	4YM7_14_RPA34	1	RPA34	KDVPK	158	1//12	11//52	2.789	1.5	K.IPAIDYSK[992.61]VR.V	4YM7_14_RPA34	1	RPA34	IPAIDYSKVR	152	126.127	21116.7	127.13	134210	21808.8	141922	6.50755	0.153668	-2.70211
				0	1.22066	JL033021_040221_RPA2HFH_Q2_1to2_50B.10160.10160.4	N	3.88375	0.184099		//6	5//26	0.97325	1	R.K[1567.92]DVPK.V	4YM7_14_RPA34	1	RPA34	KDVPK	158	//12	11//52	2.9105	1.55556	K.IPAIDYSK[992.61]VR.V	4YM7_14_RPA34	1	RPA34	IPAIDYSKVR	152	126.128	68468.8	127.131	98290.5	73452.9	99179.7	1.35025	0.740604	-0.433226
				0	1.76315	JL033021_040221_RPA2HFH_Q2_5to1_50B.10544.10544.4	N	3.71075	0.184106		//6	4//26	1.1415	0.9	R.K[1567.92]DVPK.V	4YM7_14_RPA34	1	RPA34	KDVPK	158	//12	9//52	2.56925	1.22222	K.IPAIDYSK[992.61]VR.V	4YM7_14_RPA34	1	RPA34	IPAIDYSKVR	152	126.127	98814.2	127.13	23206.5	106972	15996.8	0.149541	6.68711	2.74138
				0	8.45378	JL033021_040221_RPA2HFH_Q2_1to1_50B.10589.10589.4	N	3.5855	0.172359		//6	4//26	1.18775	0.9	R.K[1567.93]DVPK.V	4YM7_14_RPA34	1	RPA34	KDVPK	158	//12	8//52	2.39775	1.16667	K.IPAIDYSK[992.63]VR.V	4YM7_14_RPA34	1	RPA34	IPAIDYSKVR	152	126.127	48053.7	127.13	40313.5	51784.9	38885.3	0.750902	1.33173	0.413304
				0	5.56055	JL033021_040221_RPA2HFH_Q2_1to10_1ug.10632.10632.4	N	3.546	0.175623		//6	3//26	1.06	0.8	R.K[1567.93]DVPK.V	4YM7_14_RPA34	1	RPA34	KDVPK	158	//12	9//52	2.486	1.33333	K.IPAIDYSK[992.62]VR.V	4YM7_14_RPA34	1	RPA34	IPAIDYSKVR	152	126.127	10119.3	127.13	58058.1	10501.8	61305.6	5.8376	0.171303	-2.54538
				0	2.72757	JL033021_040221_RPA2HFH_Q2_1to5_1ug.10551.10551.4	N	3.51225	0.187871		1//6	5//26	1.1955	1	R.K[1567.92]DVPK.V	4YM7_14_RPA34	1	RPA34	KDVPK	158	//12	7//52	2.31675	1	K.IPAIDYSK[992.62]VR.V	4YM7_14_RPA34	1	RPA34	IPAIDYSKVR	152	126.126	12625.7	127.13	42004.4	13350.6	43877.7	3.28658	0.304268	-1.71659
				0	6.28386	JL033021_040221_RPA2HFH_Q2_2to1_1ug.10561.10561.4	N	3.50125	0.17627		1//6	4//26	0.9485	0.9	R.K[1567.93]DVPK.V	4YM7_14_RPA34	1	RPA34	KDVPK	158	//12	8//52	2.55275	1.16667	K.IPAIDYSK[992.62]VR.V	4YM7_14_RPA34	1	RPA34	IPAIDYSKVR	152	126.127	59611.3	127.131	28241.3	64417	24911.3	0.38672	2.58585	1.37064
				0	2.6673	JL033021_040221_RPA2HFH_Q2_5to1_1ug.10546.10546.4	N	3.3605	0.176636		//6	3//26	0.986	0.8	R.K[1567.92]DVPK.V	4YM7_14_RPA34	1	RPA34	KDVPK	158	//12	8//52	2.3745	1.16667	K.IPAIDYSK[992.62]VR.V	4YM7_14_RPA34	1	RPA34	IPAIDYSKVR	152	126.127	68034.1	127.13	16569.1	73646.2	11647.5	0.158155	6.3229	2.66059
				0	2.18509	JL033021_040221_RPA2HFH_Q2_10to1_1ug.10534.10534.4	N	3.35425	0.169973		//6	4//26	0.90275	0.9	R.K[1567.92]DVPK.V	4YM7_14_RPA34	1	RPA34	KDVPK	158	//12	9//52	2.4515	1.33333	K.IPAIDYSK[992.61]VR.V	4YM7_14_RPA34	1	RPA34	IPAIDYSKVR	152	126.128	78160.7	127.131	13963.2	84649.3	7946.05	0.0938702	10.653	3.41319
				0	1.46177	JL033021_040221_RPA2HFH_Q2_1to2_1ug.10613.10613.4	N	3.338	0.154348		//6	3//26	1.093	0.8	R.K[1567.92]DVPK.V	4YM7_14_RPA34	1	RPA34	KDVPK	158	//12	8//52	2.245	1.16667	K.IPAIDYSK[992.61]VR.V	4YM7_14_RPA34	1	RPA34	IPAIDYSKVR	152	126.127	29700.5	127.13	43888.7	31852.3	44364.1	1.39281	0.717975	-0.477995
				0	1.10011	JL033021_040221_RPA2HFH_Q2_1to5_50B.10335.10335.4	N	3.16625	0.155147		1//6	5//26	0.96475	1	R.K[1567.92]DVPK.V	4YM7_14_RPA34	1	RPA34	KDVPK	158	//12	7//52	2.2015	1.11111	K.IPAIDYSK[992.61]VR.V	4YM7_14_RPA34	1	RPA34	IPAIDYSKVR	152	126.128	28914.7	127.131	103267	30517.2	108064	3.54107	0.2824	-1.82419
				0	1.82343	JL033021_040221_RPA2HFH_Q2_10to1_50B.10553.10553.4	N	2.9185	0.157247		//6	3//26	0.942	0.8	R.K[1567.92]DVPK.V	4YM7_14_RPA34	1	RPA34	KDVPK	158	//12	8//52	1.9765	1.16667	K.IPAIDYSK[992.61]VR.V	4YM7_14_RPA34	1	RPA34	IPAIDYSKVR	152	126.127	50687.5	127.131	9741.42	54889.8	5888.36	0.107276	9.32175	3.2206
7	AC19
	1	AC19:2---AC19:9	5.54425
				-141	46.629	JL033021_040221_RPA2HFH_Q2_2to1_50B.07318.07318.4	P	5.54425	0.190508	7.9e-06	//13	12//72	4.83875	1.45833	K.K[1127.57]TATEVTPQEPK.H	4YM7_11_RPAC19	1	AC19	KTATEVTPQEPK	9	//8	4//37	0.7055	0.857143	M.T[1566.81]EDIEQK.K	4YM7_11_RPAC19	1	AC19	TEDIEQK	2	126.127	165522	127.131	55696	179051	44823.4	0.250339	3.99458	1.99805
				-141	46.629	JL033021_040221_RPA2HFH_Q2_1to2_50B.07724.07724.4	P	5.52725	0.197187	4.92e-05	//13	10//72	4.85625	1.375	K.K[1127.57]TATEVTPQEPK.H	4YM7_11_RPAC19	1	AC19	KTATEVTPQEPK	9	//8	4//37	0.671	0.857143	M.T[1566.81]EDIEQK.K	4YM7_11_RPAC19	1	AC19	TEDIEQK	2	126.127	86957.6	127.131	89379.9	93575.8	87971.5	0.940109	1.06371	0.0891006
				-141	49.3566	JL033021_040221_RPA2HFH_Q2_2to1_1ug.07842.07842.4	P	5.36025	0.205511	0.017	//13	12//72	4.65275	1.54167	K.K[1127.57]TATEVTPQEPK.H	4YM7_11_RPAC19	1	AC19	KTATEVTPQEPK	9	//8	4//37	0.7075	0.857143	M.T[1566.81]EDIEQK.K	4YM7_11_RPAC19	1	AC19	TEDIEQK	2	126.127	55204.4	127.13	17335.2	59726.4	13620.2	0.228044	4.38513	2.13262
				-141	48.4124	JL033021_040221_RPA2HFH_Q2_5to1_1ug.07940.07940.4	P	5.234	0.199954	1.73e-11	//13	10//72	4.5115	1.375	K.K[1127.57]TATEVTPQEPK.H	4YM7_11_RPAC19	1	AC19	KTATEVTPQEPK	9	//8	4//37	0.7225	0.857143	M.T[1566.81]EDIEQK.K	4YM7_11_RPAC19	1	AC19	TEDIEQK	2	126.127	72806.1	127.13	14472	78838.3	8971.96	0.113802	8.78718	3.1354
				-141	49.6713	JL033021_040221_RPA2HFH_Q2_1to2_1ug.07914.07914.4	P	5.18	0.189598	0.00101	//13	10//72	4.454	1.375	K.K[1127.57]TATEVTPQEPK.H	4YM7_11_RPAC19	1	AC19	KTATEVTPQEPK	9	//8	4//37	0.726	0.857143	M.T[1566.81]EDIEQK.K	4YM7_11_RPAC19	1	AC19	TEDIEQK	2	126.127	32786.6	127.13	39336.4	35236.2	39208.8	1.11274	0.89868	-0.154121
				-141	49.5664	JL033021_040221_RPA2HFH_Q2_1to10_1ug.07905.07905.4	P	5.1765	0.205584	0.00297	//13	12//72	4.615	1.54167	K.K[1127.57]TATEVTPQEPK.H	4YM7_11_RPAC19	1	AC19	KTATEVTPQEPK	9	//8	4//37	0.5615	0.857143	M.T[1566.81]EDIEQK.K	4YM7_11_RPAC19	1	AC19	TEDIEQK	2	126.127	9019.02	127.131	40287	9453.18	42361.2	4.48116	0.223157	-2.16387
				-142	47.8879	JL033021_040221_RPA2HFH_Q2_10to1_1ug.07812.07812.4	P	5.14025	0.18586	0.00135	//13	11//72	4.47925	1.41667	K.K[1127.57]TATEVTPQEPK.H	4YM7_11_RPAC19	1	AC19	KTATEVTPQEPK	9	//8	4//37	0.661	0.857143	M.T[1566.81]EDIEQK.K	4YM7_11_RPAC19	1	AC19	TEDIEQK	2	126.127	83654.4	127.131	11716.6	90625.4	5045.42	0.0556733	17.9619	4.16687
				-142	45.7897	JL033021_040221_RPA2HFH_Q2_1to1_1ug.07903.07903.4	P	4.992	0.196361	1.07e-05	//13	11//72	4.2995	1.41667	K.K[1127.57]TATEVTPQEPK.H	4YM7_11_RPAC19	1	AC19	KTATEVTPQEPK	9	//8	4//37	0.6925	0.857143	M.T[1566.81]EDIEQK.K	4YM7_11_RPAC19	1	AC19	TEDIEQK	2	126.127	42896.6	127.13	28852	46285.4	27066.3	0.58477	1.71007	0.774059
				-141	42.3859	JL033021_040221_RPA2HFH_Q2_2to1_50B.07310.07310.3	NP	4.9855	0.169526	4.64e-08	//13	12//57	3.822	1.58333	K.K[1127.57]TATEVTPQEPK.H	4YM7_11_RPAC19	1	AC19	KTATEVTPQEPK	9	//8	6//29	1.1635	1	M.T[1566.81]EDIEQK.K	4YM7_11_RPAC19	1	AC19	TEDIEQK	2	126.127	121177	127.131	37975.6	131104	29815.6	0.22742	4.39715	2.13657
				-141	52.3989	JL033021_040221_RPA2HFH_Q2_1to5_1ug.07875.07875.4	P	4.79	0.19247	3.84e-05	//13	11//72	4.1055	1.375	K.K[1127.57]TATEVTPQEPK.H	4YM7_11_RPAC19	1	AC19	KTATEVTPQEPK	9	//8	4//37	0.6845	0.857143	M.T[1566.81]EDIEQK.K	4YM7_11_RPAC19	1	AC19	TEDIEQK	2	126.127	12189.9	127.13	28718.7	12986	29680.1	2.28555	0.437531	-1.19254
				-142	45.7897	JL033021_040221_RPA2HFH_Q2_1to5_50B.07823.07823.4	P	4.3285	0.176242	0.00824	//13	9//72	3.7775	1.04167	K.K[1127.57]TATEVTPQEPK.H	4YM7_11_RPAC19	1	AC19	KTATEVTPQEPK	9	1//8	5//37	0.551	0.928571	M.T[1566.81]EDIEQK.K	4YM7_11_RPAC19	1	AC19	TEDIEQK	2	126.127	42440	127.131	93436.2	45264.9	96314.5	2.1278	0.469969	-1.08936
				-141	43.8021	JL033021_040221_RPA2HFH_Q2_1to5_50B.07806.07806.3	NP	4.151	0.214722	2.62e-06	//13	11//57	3.143	1.33333	K.K[1127.57]TATEVTPQEPK.H	4YM7_11_RPAC19	1	AC19	KTATEVTPQEPK	9	//8	4//29	1.008	0.857143	M.T[1566.81]EDIEQK.K	4YM7_11_RPAC19	1	AC19	TEDIEQK	2	126.126	17207.8	127.13	42644.7	18314.5	44152.5	2.4108	0.414801	-1.26951
				-141	44.3529	JL033021_040221_RPA2HFH_Q2_1to2_50B.07726.07726.3	NP	3.57175	0.130237	1.56e-07	//13	12//57	2.28375	1.125	K.K[1127.57]TATEVTPQEPK.H	4YM7_11_RPAC19	1	AC19	KTATEVTPQEPK	9	//8	6//29	1.288	1.21429	M.T[1566.81]EDIEQK.K	4YM7_11_RPAC19	1	AC19	TEDIEQK	2	126.127	43424.2	127.13	47129	46708.9	46604.3	0.99776	1.00224	0.00323456
				-142	43.5866	JL033021_040221_RPA2HFH_Q2_1to1_50B.07993.07993.4	P	3.1585	0.141481	2.43e-07	//13	7//72	2.995	0.75	K.K[1127.57]TATEVTPQEPK.H	4YM7_11_RPAC19	1	AC19	KTATEVTPQEPK	9	//8	2//37	0.1635	0.285714	M.T[1566.81]EDIEQK.K	4YM7_11_RPAC19	1	AC19	TEDIEQK	2	126.126	57353.5	127.129	35798.8	61907	33212.6	0.536491	1.86396	0.898373
				-141	44.825	JL033021_040221_RPA2HFH_Q2_1to1_50B.07983.07983.3	NP	2.2135	0.135093	1.29e-06	//13	8//57	1.8255	0.625	K.K[1127.57]TATEVTPQEPK.H	4YM7_11_RPAC19	1	AC19	KTATEVTPQEPK	9	//8	4//29	0.388	0.428571	M.T[1566.81]EDIEQK.K	4YM7_11_RPAC19	1	AC19	TEDIEQK	2	126.126	22143.3	127.13	12439.6	23912.6	11342.2	0.474318	2.10829	1.07607
				-141	44.5103	JL033021_040221_RPA2HFH_Q2_5to1_1ug.07943.07943.3	NP	2.151	0.107274	4.05e-10	//13	8//57	1.75425	0.625	K.K[1127.57]TATEVTPQEPK.H	4YM7_11_RPAC19	1	AC19	KTATEVTPQEPK	9	//8	3//29	0.39675	0.357143	M.T[1566.81]EDIEQK.K	4YM7_11_RPAC19	1	AC19	TEDIEQK	2	126.126	28419.3	127.13	4364.62	30784.4	2125.76	0.0690533	14.4816	3.85615
				-141	40.4975	JL033021_040221_RPA2HFH_Q2_1to1_50B.07995.07995.3	P	1.74625	0.108067	0.000333	//13	7//57	1.41875	0.458333	K.K[1127.57]TATEVTPQEPK.H	4YM7_11_RPAC19	1	AC19	KTATEVTPQEPK	9	//8	3//29	0.3275	0.357143	M.T[1566.81]EDIEQK.K	4YM7_11_RPAC19	1	AC19	TEDIEQK	2	126.126	24388.1	127.13	15334.7	26323.4	14243	0.541078	1.84816	0.886093
				-141	43.1727	JL033021_040221_RPA2HFH_Q2_1to10_50B.07893.07893.3	NP	1.7375	0.0872874	0.000179	//13	8//57	1.37975	0.583333	K.K[1127.57]TATEVTPQEPK.H	4YM7_11_RPAC19	1	AC19	KTATEVTPQEPK	9	//8	4//29	0.35775	0.428571	M.T[1566.81]EDIEQK.K	4YM7_11_RPAC19	1	AC19	TEDIEQK	2	126.126	12466.9	127.13	47827.3	13131	50131.7	3.81781	0.26193	-1.93275
				-141	49.2311	JL033021_040221_RPA2HFH_Q2_10to1_1ug.07817.07817.3	P	1.69175	0.0853966	0.236	//13	8//57	1.525	0.583333	K.K[1127.57]TATEVTPQEPK.H	4YM7_11_RPAC19	1	AC19	KTATEVTPQEPK	9	//8	2//29	0.16675	0.142857	M.T[1566.81]EDIEQK.K	4YM7_11_RPAC19	1	AC19	TEDIEQK	2	126.126	34654.9	127.13	5291.16	37539.2	2558.84	0.0681646	14.6704	3.87483
				-142	45.2708	JL033021_040221_RPA2HFH_Q2_5to1_50B.07929.07929.3	NP	1.5725	0.0889499	0.0018	//13	6//57	1.2845	0.416667	K.K[1127.57]TATEVTPQEPK.H	4YM7_11_RPAC19	1	AC19	KTATEVTPQEPK	9	//8	3//29	0.288	0.357143	M.T[1566.81]EDIEQK.K	4YM7_11_RPAC19	1	AC19	TEDIEQK	2	126.127	29629.2	127.13	5424.72	32087.8	3153.14	0.0982658	10.1765	3.34717
				-141	44.5103	JL033021_040221_RPA2HFH_Q2_1to2_1ug.07907.07907.3	P	1.53375	0.0937013	0.0823	//13	7//57	1.3555	0.5	K.K[1127.57]TATEVTPQEPK.H	4YM7_11_RPAC19	1	AC19	KTATEVTPQEPK	9	//8	2//29	0.17825	0.142857	M.T[1566.81]EDIEQK.K	4YM7_11_RPAC19	1	AC19	TEDIEQK	2	126.126	11542.7	127.13	11392.7	12425.1	11172	0.899149	1.11216	0.153368
				-142	44.7201	JL033021_040221_RPA2HFH_Q2_10to1_50B.07854.07854.3	NP	1.4255	0.0736578	2.23e-08	//13	8//57	1.1205	0.5	K.K[1127.57]TATEVTPQEPK.H	4YM7_11_RPAC19	1	AC19	KTATEVTPQEPK	9	//8	3//29	0.305	0.357143	M.T[1566.81]EDIEQK.K	4YM7_11_RPAC19	1	AC19	TEDIEQK	2	126.126	30248.4	127.13	4817.84	32764.3	2447.22	0.0746915	13.3884	3.74291
				-142	45.2708	JL033021_040221_RPA2HFH_Q2_5to1_50B.07935.07935.3	P	0.9435	0.0701174	0.00969	//13	5//57	0.644	0.291667	K.K[1127.57]TATEVTPQEPK.H	4YM7_11_RPAC19	1	AC19	KTATEVTPQEPK	9	//8	3//29	0.2995	0.357143	M.T[1566.81]EDIEQK.K	4YM7_11_RPAC19	1	AC19	TEDIEQK	2	126.126	22602	127.13	4717.71	24472.9	3026.36	0.123662	8.08655	3.01553
				-141	43.8808	JL033021_040221_RPA2HFH_Q2_1to1_1ug.07897.07897.3	P	0.7985	0.0418764	0.298	//13	5//57	0.62125	0.291667	K.K[1127.57]TATEVTPQEPK.H	4YM7_11_RPAC19	1	AC19	KTATEVTPQEPK	9	//8	3//29	0.17725	0.214286	M.T[1566.81]EDIEQK.K	4YM7_11_RPAC19	1	AC19	TEDIEQK	2	126.126	18622.3	127.13	11700.8	20100.1	10866.5	0.54062	1.84973	0.887313
				-141	44.1955	JL033021_040221_RPA2HFH_Q2_1to10_1ug.07912.07912.3	P	0.1875	0.0125881	0.289	//13	2//57	0.13325	0.0833333	K.K[1127.57]TATEVTPQEPK.H	4YM7_11_RPAC19	1	AC19	KTATEVTPQEPK	9	//8	1//29	0.05425	0.0714286	M.T[1566.81]EDIEQK.K	4YM7_11_RPAC19	1	AC19	TEDIEQK	2	126.126	3250.41	127.129	13963.2	3411.4	14670.9	4.30054	0.232529	-2.10452
	2	AC19:---AC19:9	9.02975
				0	4.45718	JL033021_040221_RPA2HFH_Q2_2to1_50B.07145.07145.3	N	9.02975	0.302732		//	10//17	3.90575	1.03571	M.m[1753.91]TEDIEQK.K	4YM7_11_RPAC19	1	AC19	TEDIEQK		//13	16//52	5.124	1.75	K.K[1415.72]TATEVTPQEPK.H	4YM7_11_RPAC19	1	AC19	KTATEVTPQEPK	9	126.127	52796.7	127.13	20415.7	57090.3	17137.4	0.30018	3.33133	1.7361
				0	2.89924	JL033021_040221_RPA2HFH_Q2_2to1_50B.07148.07148.4	N	7.5165	0.294563		//	7//25	1.0985	0.714286	M.m[1753.89]TEDIEQK.K	4YM7_11_RPAC19	1	AC19	TEDIEQK		1//13	18//66	6.418	2.29167	K.K[1415.7]TATEVTPQEPK.H	4YM7_11_RPAC19	1	AC19	KTATEVTPQEPK	9	126.127	198993	127.13	99766.5	214990	89043.8	0.414176	2.41443	1.27169
				0	6.4466	JL033021_040221_RPA2HFH_Q2_1to2_50B.07549.07549.4	N	7.201	0.281371		//	8//25	1.03775	0.75	M.m[1753.88]TEDIEQK.K	4YM7_11_RPAC19	1	AC19	TEDIEQK		//13	15//66	6.16325	2.04167	K.K[1415.69]TATEVTPQEPK.H	4YM7_11_RPAC19	1	AC19	KTATEVTPQEPK	9	126.127	42998.8	127.13	62699.3	46121	63327.3	1.37307	0.728295	-0.457406
				0	0.867636	JL033021_040221_RPA2HFH_Q2_2to1_50B.06192.06192.3	N	4.42675	0.214729		//5	4//16	0.9335	0.75	K.IK[1734.96]SM[147.04].-	4YM7_11_RPAC19	1	AC19	IKSM		//13	14//57	3.49325	1.45833	K.K[900.52]TATEVTPQEPK.H	4YM7_11_RPAC19	1	AC19	KTATEVTPQEPK	9	126.127	42807.6	127.13	19967.1	46261.1	17553.4	0.379443	2.63544	1.39805
8	RPA43
	1	RPA43:18---RPA43:18	3.3715
				0	7.8001	JL033021_040221_RPA2HFH_Q2_1to1_100B.06210.06210.5	N	3.3715	0.184973		//10	7//45	1.68575	0.785714	R.ETARFIK[1398.83]K.H	4YM7_7_RPA43	1	RPA43	ETARFIKK	18	//10	7//45	1.68575	0.785714	R.ETARFIK[1398.83]K.H	4YM7_7_RPA43	1	RPA43	ETARFIKK	18	126.127	73757.6	127.13	72426.6	79398.8	70989.6	0.89409	1.11846	0.161509
				0	3.34853	JL033021_040221_RPA2HFH_Q2_1to2_100B.06296.06296.5	N	3.2455	0.176862		//10	7//45	1.62275	0.785714	R.ETARFIK[1398.84]K.H	4YM7_7_RPA43	1	RPA43	ETARFIKK	18	//10	7//45	1.62275	0.785714	R.ETARFIK[1398.84]K.H	4YM7_7_RPA43	1	RPA43	ETARFIKK	18	126.127	51563.6	127.13	75983.3	55301.2	76793.3	1.38864	0.72013	-0.473671
				0	6.85582	JL033021_040221_RPA2HFH_Q2_2to1_100B.05898.05898.5	N	3.2205	0.165728		//10	7//45	1.61025	0.785714	R.ETARFIK[1398.83]K.H	4YM7_7_RPA43	1	RPA43	ETARFIKK	18	//10	7//45	1.61025	0.785714	R.ETARFIK[1398.83]K.H	4YM7_7_RPA43	1	RPA43	ETARFIKK	18	126.127	106878	127.13	49778.9	115501	43747.4	0.378763	2.64017	1.40063
				0	3.21363	JL033021_040221_RPA2HFH_Q2_10to1_100B.05838.05838.5	N	3.198	0.201652		//10	7//45	1.599	0.785714	R.ETARFIK[1398.84]K.H	4YM7_7_RPA43	1	RPA43	ETARFIKK	18	//10	7//45	1.599	0.785714	R.ETARFIK[1398.84]K.H	4YM7_7_RPA43	1	RPA43	ETARFIKK	18	126.127	119556	127.13	21778	129478	12604	0.0973445	10.2728	3.36076
9	RPB6
	1	RPB6:123---RPB6:129	3.2265
				-141	51.8224	JL033021_040221_RPA2HFH_Q2_5to1_50B.11717.11717.4	NP	3.2265	0.112805	7.46e-10	//11	7//50	1.046	1.11111	R.IAM[147.04]K[1103.74]ELAEK.K	4YM7_6_RPB6	1	RPB6	IAMKELAEK	123	//8	9//38	2.1805	1.42857	K.K[1313.73]IPLVIR.R	4YM7_6_RPB6	1	RPB6	KIPLVIR	129	126.127	144296	127.13	36630.4	156187	26298.5	0.168378	5.939	2.57022
				-141	50.9777	JL033021_040221_RPA2HFH_Q2_1to1_50B.11805.11805.4	NP	3.1655	0.125213	7.85e-13	//11	7//50	0.9775	1.11111	R.IAM[147.04]K[1103.74]ELAEK.K	4YM7_6_RPB6	1	RPB6	IAMKELAEK	123	//8	6//38	2.188	1.21429	K.K[1313.73]IPLVIR.R	4YM7_6_RPB6	1	RPB6	KIPLVIR	129	126.127	49212.3	127.13	47355.2	52984	46327.1	0.874359	1.14369	0.193702
				-141	51.7017	JL033021_040221_RPA2HFH_Q2_1to2_1ug.11863.11863.4	NP	2.95525	0.12535	1.25e-05	//11	9//50	1.035	1.22222	R.IAM[147.04]K[1103.74]ELAEK.K	4YM7_6_RPB6	1	RPB6	IAMKELAEK	123	//8	7//38	1.92025	1.28571	K.K[1313.73]IPLVIR.R	4YM7_6_RPB6	1	RPB6	KIPLVIR	129	126.127	22246.2	127.131	38250.6	23814.2	38991.5	1.63733	0.610752	-0.711341
				-141	50.7363	JL033021_040221_RPA2HFH_Q2_2to1_1ug.11806.11806.4	NP	2.9385	0.140682	8.19e-05	//11	7//50	0.82675	1	R.IAM[147.04]K[1103.74]ELAEK.K	4YM7_6_RPB6	1	RPB6	IAMKELAEK	123	//8	6//38	2.11175	1.21429	K.K[1313.73]IPLVIR.R	4YM7_6_RPB6	1	RPB6	KIPLVIR	129	126.127	48354.8	127.13	24618.3	52239	22039.6	0.421899	2.37024	1.24503
				-141	49.047	JL033021_040221_RPA2HFH_Q2_1to2_50B.11320.11320.4	NP	2.91125	0.119903	0.000664	//11	7//50	0.936	1.11111	R.IAM[147.04]K[1103.74]ELAEK.K	4YM7_6_RPB6	1	RPB6	IAMKELAEK	123	//8	7//38	1.97525	1.28571	K.K[1313.73]IPLVIR.R	4YM7_6_RPB6	1	RPB6	KIPLVIR	129	126.127	69954.2	127.13	121255	74877	123655	1.65144	0.60553	-0.723729
				-141	51.0984	JL033021_040221_RPA2HFH_Q2_2to1_50B.11059.11059.4	P	2.74875	0.109895	2.52e-05	//11	10//50	0.93375	1.27778	R.IAM[147.04]K[1103.74]ELAEK.K	4YM7_6_RPB6	1	RPB6	IAMKELAEK	123	//8	7//38	1.815	1.28571	K.K[1313.73]IPLVIR.R	4YM7_6_RPB6	1	RPB6	KIPLVIR	129	126.127	169297	127.13	83870.3	182916	74675.6	0.408251	2.44947	1.29247
				-141	53.5118	JL033021_040221_RPA2HFH_Q2_1to10_50B.11556.11556.4	NP	2.71075	0.113428	0.00058	//11	6//50	0.7475	0.944444	R.IAM[147.04]K[1103.74]ELAEK.K	4YM7_6_RPB6	1	RPB6	IAMKELAEK	123	//8	7//38	1.96325	1.28571	K.K[1313.73]IPLVIR.R	4YM7_6_RPB6	1	RPB6	KIPLVIR	129	126.127	21339.5	127.13	135177	22042.5	142938	6.48463	0.154211	-2.69702
				-141	52.7877	JL033021_040221_RPA2HFH_Q2_1to5_1ug.11780.11780.4	NP	2.489	0.121305	2.95e-07	//11	7//50	0.596	0.944444	R.IAM[147.04]K[1103.74]ELAEK.K	4YM7_6_RPB6	1	RPB6	IAMKELAEK	123	//8	7//38	1.893	1.28571	K.K[1313.73]IPLVIR.R	4YM7_6_RPB6	1	RPB6	KIPLVIR	129	126.127	14562.9	127.13	56188.8	15336	58903.6	3.84087	0.260358	-1.94143
				-141	50.495	JL033021_040221_RPA2HFH_Q2_1to10_1ug.11877.11877.4	NP	2.3045	0.127564	0.00116	//11	6//50	0.629	0.944444	R.IAM[147.04]K[1103.74]ELAEK.K	4YM7_6_RPB6	1	RPB6	IAMKELAEK	123	//8	7//38	1.6755	1.28571	K.K[1313.73]IPLVIR.R	4YM7_6_RPB6	1	RPB6	KIPLVIR	129	126.127	8069.51	127.13	55628.1	8298.68	58885.7	7.09579	0.140929	-2.82696
				-142	55.3218	JL033021_040221_RPA2HFH_Q2_10to1_1ug.11736.11736.4	P	2.09975	0.106689	0.00456	//11	7//50	0.44525	0.777778	R.IAM[147.04]K[1103.74]ELAEK.K	4YM7_6_RPB6	1	RPB6	IAMKELAEK	123	//8	6//38	1.6545	1.21429	K.K[1313.73]IPLVIR.R	4YM7_6_RPB6	1	RPB6	KIPLVIR	129	126.127	67318.7	127.131	10447.9	72920.1	5152.39	0.0706581	14.1527	3.823
				-141	47.8167	JL033021_040221_RPA2HFH_Q2_1to10_50B.11568.11568.3	P	0.55975	0.0203073	0.566	//11	5//40	0.503	0.722222	R.IAM[147.04]K[1103.74]ELAEK.K	4YM7_6_RPB6	1	RPB6	IAMKELAEK	123	//8	2//30	0.05675	0.142857	K.K[1313.73]IPLVIR.R	4YM7_6_RPB6	1	RPB6	KIPLVIR	129	126.127	51136.7	127.13	335118	52730.5	354516	6.72316	0.14874	-2.74914
10	RPA14
	1	RPA14:118---RPA14:131	4.2825
				-142	49.1943	JL033021_040221_RPA2HFH_Q2_2to1_50B.08772.08772.3	NP	4.2825	0.158166	0.00242	//14	9//62	2.897	1.23077	K.K[1076.54]ETSIGVSATGGK.K	4YM7_4_RPA14	1	RPA14	KETSIGVSATGGK	118	//8	4//29	1.3855	0.857143	K.K[1499.82]TTFADE.-	4YM7_4_RPA14	1	RPA14	KTTFADE	131	126.127	155564	127.13	59070.9	168224	49333.9	0.293264	3.4099	1.76973
				-141	45.3623	JL033021_040221_RPA2HFH_Q2_2to1_50B.08763.08763.3	NP	3.08375	0.112216	0.000879	1//14	10//62	2.60325	1.26923	K.K[1076.54]ETSIGVSATGGK.K	4YM7_4_RPA14	1	RPA14	KETSIGVSATGGK	118	//8	3//29	0.4805	0.357143	K.K[1499.82]TTFADE.-	4YM7_4_RPA14	1	RPA14	KTTFADE	131	126.127	156081	127.13	56966.9	168802	47032.9	0.278628	3.58901	1.84359
				-142	51.8795	JL033021_040221_RPA2HFH_Q2_1to10_50B.09387.09387.3	P	1.013	0.039115	0.168	//14	7//62	0.57	0.346154	K.K[1076.54]ETSIGVSATGGK.K	4YM7_4_RPA14	1	RPA14	KETSIGVSATGGK	118	//8	3//29	0.443	0.357143	K.K[1499.82]TTFADE.-	4YM7_4_RPA14	1	RPA14	KTTFADE	131	126.127	20303.7	127.13	94598.7	21249.4	99547.5	4.68473	0.213459	-2.22797
	2	RPA14:---RPA14:	11.9437
				-2	2.06505	JL033021_040221_RPA2HFH_Q2_2to1_50B.13091.13091.4	N	11.9437	0.320844		1//21	17//110	4.6045	1.33333	K.E[111.03]TSIGVSATGGK[2602.36]KTTFADE.-	4YM7_4_RPA14	1	RPA14	ETSIGVSATGGKKTTFADE		8//18	26//115	7.33925	1.97368	K.ETSIGVSATGGK[2287.17]K[425.27]TTFADE.-	4YM7_4_RPA14	1	RPA14	ETSIGVSATGGKKTTFADE		126.127	63896.4	127.13	30481.9	69045.8	26927.7	0.389997	2.56412	1.35846
11	AC40
	1	AC40:---AC40:	5.6985
				-3	12.4639	JL033021_040221_RPA2HFH_Q2_1to10_50B.13342.13342.4	N	5.6985	0.222034		//	8//37	2.84925	0.625	M.m[1736.87]SNIVGIEYNR.V	4YM7_3_RPAC40	1	AC40	SNIVGIEYNR		//	8//37	2.84925	0.625	M.m[1736.87]SNIVGIEYNR.V	4YM7_3_RPAC40	1	AC40	SNIVGIEYNR		126.127	15471.8	127.131	93513.5	16018.1	98818.4	6.16918	0.162096	-2.62508
	2	AC40:2---AC40:2	5.081
				-1	16.3419	JL033021_040221_RPA2HFH_Q2_2to1_1ug.13577.13577.3	N	5.081	0.189103		//	7//25	2.5405	0.666667	M.S[1529.75]NIVGIEYNR.V	4YM7_3_RPAC40	1	AC40	SNIVGIEYNR	2	//	7//25	2.5405	0.666667	M.S[1529.75]NIVGIEYNR.V	4YM7_3_RPAC40	1	AC40	SNIVGIEYNR	2	126.126	44135.5	127.13	21895.8	47685.5	19501	0.40895	2.44529	1.29
	3	AC40:1---AC40:148	0.85275
				-142	35.4271	JL033021_040221_RPA2HFH_Q2_10to1_D.14997.14997.3	P	0.85275	0.0316707	0.0198	1//14	4//45	0.19725	0.166667	R.NPDAPK[1560.8]GSTDPK.E	4YM7_3_RPAC40	1	AC40	NPDAPKGSTDPK	148	1//12	6//50	0.6555	0.454545	-.M[1494.7]SNIVGIEYNR.V	4YM7_3_RPAC40	1	AC40	MSNIVGIEYNR	1	126.127	5271.21	127.13	1249.01	5706.31	865.203	0.151622	6.59534	2.72145
	4	AC40:38---AC40:38	7.3475
				-3	20.0806	JL033021_040221_RPA2HFH_Q2_2to1_100B.22011.22011.4	N	7.3475	0.231301		//14	7//72	3.67375	0.807692	K.K[1899.95]DFEVNISSLDAR.E	4YM7_3_RPAC40	1	AC40	KDFEVNISSLDAR	38	//14	7//72	3.67375	0.807692	K.K[1899.95]DFEVNISSLDAR.E	4YM7_3_RPAC40	1	AC40	KDFEVNISSLDAR	38	126.127	29641.9	127.13	13023.5	32039.8	11294.7	0.35252	2.83672	1.50422
				-1	13.9169	JL033021_040221_RPA2HFH_Q2_2to1_100B.22014.22014.4	N	7.1075	0.229808		//14	7//72	3.55375	0.807692	K.K[1899.97]DFEVNISSLDAR.E	4YM7_3_RPAC40	1	AC40	KDFEVNISSLDAR	38	//14	7//72	3.55375	0.807692	K.K[1899.97]DFEVNISSLDAR.E	4YM7_3_RPAC40	1	AC40	KDFEVNISSLDAR	38	126.127	29021.3	127.13	12773.9	31368.8	11083	0.353312	2.83036	1.50099
				-1	18.3279	JL033021_040221_RPA2HFH_Q2_1to2_100B.24870.24870.4	N	6.043	0.221729		//14	6//72	3.0215	0.653846	K.K[1899.95]DFEVNISSLDAR.E	4YM7_3_RPAC40	1	AC40	KDFEVNISSLDAR	38	//14	6//72	3.0215	0.653846	K.K[1899.95]DFEVNISSLDAR.E	4YM7_3_RPAC40	1	AC40	KDFEVNISSLDAR	38	126.127	8015.69	127.13	11567.1	8598.69	11675.5	1.35783	0.73647	-0.441301
				0	15.8803	JL033021_040221_RPA2HFH_Q2_1to1_1ug.20456.20456.4	N	5.817	0.226026		//14	7//72	2.9085	0.769231	K.K[1899.96]DFEVNISSLDAR.E	4YM7_3_RPAC40	1	AC40	KDFEVNISSLDAR	38	//14	7//72	2.9085	0.769231	K.K[1899.96]DFEVNISSLDAR.E	4YM7_3_RPAC40	1	AC40	KDFEVNISSLDAR	38	126.127	24731.5	127.13	20961.9	26650.1	20242.2	0.759554	1.31656	0.396775
				-1	4.77312	JL033021_040221_RPA2HFH_Q2_2to1_100B.25060.25060.4	N	5.162	0.17719		//14	8//72	2.581	0.846154	K.K[1900.03]DFEVNISSLDAR.E	4YM7_3_RPAC40	1	AC40	KDFEVNISSLDAR	38	//14	8//72	2.581	0.846154	K.K[1900.03]DFEVNISSLDAR.E	4YM7_3_RPAC40	1	AC40	KDFEVNISSLDAR	38	126.127	12343.8	127.13	5012	13345.7	4262.63	0.319401	3.13086	1.64656
				-2	2.39471	JL033021_040221_RPA2HFH_Q2_1to2_100B.25057.25057.4	N	4.1645	0.151936		//14	6//72	2.08225	0.653846	K.K[1900.02]DFEVNISSLDAR.E	4YM7_3_RPAC40	1	AC40	KDFEVNISSLDAR	38	//14	6//72	2.08225	0.653846	K.K[1900.02]DFEVNISSLDAR.E	4YM7_3_RPAC40	1	AC40	KDFEVNISSLDAR	38	126.127	7516.44	127.13	9376.32	8075.09	9372.72	1.1607	0.861552	-0.214989
	5	AC40:25---AC40:38	5.32125
				-142	17.44	JL033021_040221_RPA2HFH_Q2_2to1_100B.17709.17709.6	P	5.32125	0.178061	0.0451	//10	7//186	0.33225	0.1875	R.VTNTTSTDFPGFSK[2034.08]DAENEWNVEK.F	4YM7_3_RPAC40	1	AC40	VTNTTSTDFPGFSKDAENEWNVEK	25	//17	10//113	4.989	1.2	K.FKK[2981.39]DFEVNISSLDAR.E	4YM7_3_RPAC40	1	AC40	FKKDFEVNISSLDAR	38	126.127	72120.7	127.13	31451.5	77956.9	27228.4	0.349275	2.86308	1.51757
				-143	27.9269	JL033021_040221_RPA2HFH_Q2_5to1_1ug.16629.16629.6	P	5.1045	0.164076	4.11e-05	//10	13//186	1.395	0.541667	R.VTNTTSTDFPGFSK[2034.08]DAENEWNVEK.F	4YM7_3_RPAC40	1	AC40	VTNTTSTDFPGFSKDAENEWNVEK	25	//17	11//113	3.7095	1	K.FKK[2981.39]DFEVNISSLDAR.E	4YM7_3_RPAC40	1	AC40	FKKDFEVNISSLDAR	38	126.127	60305.4	127.13	13558.8	65289	9115.52	0.139618	7.1624	2.84044
				-2	2.03555	JL033021_040221_RPA2HFH_Q2_1to5_1ug.16979.16979.6	N	4.3555	0.157548		//14	10//86	3.242	1.14286	K.FK[3122.5]K[425.27]DFEVNISSLDAR.E	4YM7_3_RPAC40	1	AC40	FKKDFEVNISSLDAR	38	//14	10//141	1.1135	0.608696	R.VTNTTSTDFPGFSK[2472.36]DAENEWNVEK.F	4YM7_3_RPAC40	1	AC40	VTNTTSTDFPGFSKDAENEWNVEK	25	126.127	18392.7	127.131	76114.8	19327.2	79912	4.13469	0.241856	-2.04778
				-143	17.9976	JL033021_040221_RPA2HFH_Q2_5to1_1ug.16650.16650.5	P	3.621	0.111469	0.0951	//10	15//186	2.4415	0.708333	R.VTNTTSTDFPGFSK[2034.08]DAENEWNVEK.F	4YM7_3_RPAC40	1	AC40	VTNTTSTDFPGFSKDAENEWNVEK	25	//17	6//113	1.1795	0.333333	K.FKK[2981.39]DFEVNISSLDAR.E	4YM7_3_RPAC40	1	AC40	FKKDFEVNISSLDAR	38	126.127	59342	127.13	14663.4	64235.3	10385.7	0.161683	6.18495	2.62876
				-141	24.0467	JL033021_040221_RPA2HFH_Q2_1to5_1ug.16687.16687.5	P	2.555	0.0782398	0.409	//10	10//186	1.2645	0.416667	R.VTNTTSTDFPGFSK[2034.08]DAENEWNVEK.F	4YM7_3_RPAC40	1	AC40	VTNTTSTDFPGFSKDAENEWNVEK	25	//17	8//113	1.2905	0.4	K.FKK[2981.39]DFEVNISSLDAR.E	4YM7_3_RPAC40	1	AC40	FKKDFEVNISSLDAR	38	126.127	9554.21	127.13	33070.4	10092.3	34579.9	3.42638	0.291853	-1.77668
	6	AC40:25---AC40:37	6.36725
				-1	1.31232	JL033021_040221_RPA2HFH_Q2_5to1_1ug.16615.16615.5	N	6.36725	0.179324		3//15	16//105	2.423	1.35714	K.FK[3122.48]KDFEVNISSLDAR.E	4YM7_3_RPAC40	1	AC40	FKKDFEVNISSLDAR	37	//14	19//190	3.94425	1.02174	R.VTNTTSTDFPGFSK[2175.17]DAENEWNVEK.F	4YM7_3_RPAC40	1	AC40	VTNTTSTDFPGFSKDAENEWNVEK	25	126.127	60876	127.131	12161.8	65919.2	7567.35	0.114797	8.711	3.12284
				-439	68.3157	JL033021_040221_RPA2HFH_Q2_5to1_1ug.16931.16931.6	P	4.496	0.158505	0.000479	//10	11//186	1.22275	0.5	R.VTNTTSTDFPGFSK[2034.08]DAENEWNVEK.F	4YM7_3_RPAC40	1	AC40	VTNTTSTDFPGFSKDAENEWNVEK	25	//15	10//113	3.27325	1	K.FK[2981.39]KDFEVNISSLDAR.E	4YM7_3_RPAC40	1	AC40	FKKDFEVNISSLDAR	37	126.127	81443.6	127.131	19886.6	88161.3	13998.7	0.158786	6.2978	2.65485
				-438	58.2251	JL033021_040221_RPA2HFH_Q2_1to1_1ug.16899.16899.6	NP	4.17175	0.157827	0.0611	//10	11//186	1.11575	0.604167	R.VTNTTSTDFPGFSK[2034.08]DAENEWNVEK.F	4YM7_3_RPAC40	1	AC40	VTNTTSTDFPGFSKDAENEWNVEK	25	//15	9//113	3.056	0.966667	K.FK[2981.39]KDFEVNISSLDAR.E	4YM7_3_RPAC40	1	AC40	FKKDFEVNISSLDAR	37	126.127	52963.4	127.131	54117.7	56997	53236.9	0.93403	1.07063	0.0984586
	7	AC40:240---AC40:288	2.95825
				-141	32.0816	JL033021_040221_RPA2HFH_Q2_1to2_50B.16648.16648.3	P	2.95825	0.0883521	0.00822	//18	10//69	2.06	0.676471	R.LLPQINILQPIK[1393.71]GESAR.R	4YM7_3_RPAC40	1	AC40	LLPQINILQPIKGESAR	240	//11	6//31	0.89825	0.722222	R.YEEFADK[2155.27]VK.L	4YM7_3_RPAC40	1	AC40	YEEFADKVK	288	126.127	85164.9	127.131	119759	91384.6	120686	1.32063	0.757212	-0.40123
				-141	31.269	JL033021_040221_RPA2HFH_Q2_2to1_50B.16612.16612.3	NP	2.866	0.0891571	1.73e-05	//18	12//69	2.06225	1	R.LLPQINILQPIK[1393.71]GESAR.R	4YM7_3_RPAC40	1	AC40	LLPQINILQPIKGESAR	240	//11	6//31	0.80375	0.722222	R.YEEFADK[2155.27]VK.L	4YM7_3_RPAC40	1	AC40	YEEFADKVK	288	126.127	229854	127.131	94457.2	248502	80583.9	0.324279	3.08376	1.62469
				-141	35.448	JL033021_040221_RPA2HFH_Q2_1to5_50B.16838.16838.3	P	2.77775	0.0832921	0.000276	//18	11//69	2.1925	0.882353	R.LLPQINILQPIK[1393.71]GESAR.R	4YM7_3_RPAC40	1	AC40	LLPQINILQPIKGESAR	240	//11	5//31	0.58525	0.555556	R.YEEFADK[2155.27]VK.L	4YM7_3_RPAC40	1	AC40	YEEFADKVK	288	126.127	33629.9	127.131	121624	35481.4	127311	3.58811	0.278698	-1.84322
				-141	31.5012	JL033021_040221_RPA2HFH_Q2_1to10_50B.16949.16949.3	P	2.54375	0.0757068	0.000286	//18	10//69	1.76475	0.676471	R.LLPQINILQPIK[1393.71]GESAR.R	4YM7_3_RPAC40	1	AC40	LLPQINILQPIKGESAR	240	//11	6//31	0.779	0.722222	R.YEEFADK[2155.27]VK.L	4YM7_3_RPAC40	1	AC40	YEEFADKVK	288	126.127	21649.8	127.13	123881	22471	130805	5.82107	0.17179	-2.54129
				-141	33.4746	JL033021_040221_RPA2HFH_Q2_5to1_50B.17053.17053.3	P	2.53025	0.082428	4.02e-05	//18	10//69	1.70575	0.764706	R.LLPQINILQPIK[1393.71]GESAR.R	4YM7_3_RPAC40	1	AC40	LLPQINILQPIKGESAR	240	//11	6//31	0.8245	0.722222	R.YEEFADK[2155.27]VK.L	4YM7_3_RPAC40	1	AC40	YEEFADKVK	288	126.127	78546.1	127.131	18305.3	85032	12564.3	0.14776	6.76773	2.75867
				-141	35.2697	JL033021_040221_RPA2HFH_Q2_5to1_50B.17040.17040.4	NP	2.40475	0.0726774	2.74e-05	//18	9//100	1.08925	0.588235	R.LLPQINILQPIK[1393.71]GESAR.R	4YM7_3_RPAC40	1	AC40	LLPQINILQPIKGESAR	240	//11	6//42	1.3155	0.888889	R.YEEFADK[2155.27]VK.L	4YM7_3_RPAC40	1	AC40	YEEFADKVK	288	126.127	208515	127.13	49316.6	225726	34127.8	0.151191	6.61415	2.72556
				-438	81.8665	JL033021_040221_RPA2HFH_Q2_1to2_1ug.17783.17783.6	P	2.21275	0.0726182	0.19	1//18	11//130	1.6495	0.588235	R.LLPQINILQPIK[1719.92]GESAR.R	4YM7_3_RPAC40	1	AC40	LLPQINILQPIKGESAR	240	//14	7//85	0.56325	0.583333	R.YEEFADK[2155.27]VKLGR.V	4YM7_3_RPAC40	1	AC40	YEEFADKVKLGR	288	126.127	111231	127.131	237873	118691	244915	2.06346	0.484623	-1.04506
				-141	33.6445	JL033021_040221_RPA2HFH_Q2_1to2_1ug.17163.17163.4	NP	2.00975	0.0650921	0.00405	1//18	12//100	0.96475	0.676471	R.LLPQINILQPIK[1393.71]GESAR.R	4YM7_3_RPAC40	1	AC40	LLPQINILQPIKGESAR	240	//11	6//42	1.045	0.722222	R.YEEFADK[2155.27]VK.L	4YM7_3_RPAC40	1	AC40	YEEFADKVK	288	126.127	49403.6	127.13	74243.7	52972.9	75123.1	1.41814	0.705148	-0.504002
				-141	33.2576	JL033021_040221_RPA2HFH_Q2_5to1_1ug.17089.17089.4	NP	1.8655	0.0554952	2.05e-06	//18	8//100	0.8825	0.441176	R.LLPQINILQPIK[1393.71]GESAR.R	4YM7_3_RPAC40	1	AC40	LLPQINILQPIKGESAR	240	//11	5//42	0.983	0.666667	R.YEEFADK[2155.27]VK.L	4YM7_3_RPAC40	1	AC40	YEEFADKVK	288	126.127	115468	127.13	24675.2	125020	16075.7	0.128584	7.77699	2.95921
				-141	33.6445	JL033021_040221_RPA2HFH_Q2_10to1_1ug.17185.17185.4	NP	1.828	0.05687	0.15	1//18	10//100	0.859	0.470588	R.LLPQINILQPIK[1393.71]GESAR.R	4YM7_3_RPAC40	1	AC40	LLPQINILQPIKGESAR	240	//11	5//42	0.969	0.666667	R.YEEFADK[2155.27]VK.L	4YM7_3_RPAC40	1	AC40	YEEFADKVK	288	126.127	183533	127.13	29084.6	198799	14690.2	0.0738948	13.5327	3.75838
				-141	35.6566	JL033021_040221_RPA2HFH_Q2_1to5_50B.16836.16836.4	NP	1.78875	0.0552245	0.000115	//18	7//100	0.57575	0.264706	R.LLPQINILQPIK[1393.71]GESAR.R	4YM7_3_RPAC40	1	AC40	LLPQINILQPIKGESAR	240	//11	6//42	1.213	0.888889	R.YEEFADK[2155.27]VK.L	4YM7_3_RPAC40	1	AC40	YEEFADKVK	288	126.128	87693.6	127.131	282476	92803.4	294824	3.17687	0.314776	-1.6676
				-141	32.9825	JL033021_040221_RPA2HFH_Q2_2to1_50B.16601.16601.5	P	1.771	0.0497493	2.42e-05	//18	9//131	0.921	0.588235	R.LLPQINILQPIK[1393.71]GESAR.R	4YM7_3_RPAC40	1	AC40	LLPQINILQPIKGESAR	240	//11	5//53	0.85	0.666667	R.YEEFADK[2155.27]VK.L	4YM7_3_RPAC40	1	AC40	YEEFADKVK	288	126.127	423478	127.13	173812	457836	148237	0.323778	3.08854	1.62692
				-141	33.1802	JL033021_040221_RPA2HFH_Q2_2to1_50B.16600.16600.4	NP	1.732	0.0530174	0.0138	//18	8//100	0.6865	0.382353	R.LLPQINILQPIK[1393.71]GESAR.R	4YM7_3_RPAC40	1	AC40	LLPQINILQPIKGESAR	240	1//11	6//42	1.0455	0.722222	R.YEEFADK[2155.27]VK.L	4YM7_3_RPAC40	1	AC40	YEEFADKVK	288	126.128	312421	127.131	129301	337759	110509	0.327184	3.05639	1.61183
				-141	32.8858	JL033021_040221_RPA2HFH_Q2_10to1_1ug.17183.17183.5	P	1.64125	0.0502849	0.0207	//18	9//131	0.786	0.411765	R.LLPQINILQPIK[1393.71]GESAR.R	4YM7_3_RPAC40	1	AC40	LLPQINILQPIKGESAR	240	//11	7//53	0.85525	0.777778	R.YEEFADK[2155.27]VK.L	4YM7_3_RPAC40	1	AC40	YEEFADKVK	288	126.127	259679	127.13	40012.4	281288	19564.5	0.069553	14.3775	3.84574
				-141	32.789	JL033021_040221_RPA2HFH_Q2_2to1_1ug.17150.17150.5	P	1.63675	0.0492182	0.00163	1//18	10//131	0.75275	0.470588	R.LLPQINILQPIK[1393.71]GESAR.R	4YM7_3_RPAC40	1	AC40	LLPQINILQPIKGESAR	240	//11	8//53	0.884	0.833333	R.YEEFADK[2155.27]VK.L	4YM7_3_RPAC40	1	AC40	YEEFADKVK	288	126.127	192593	127.13	77992.4	208227	66285.6	0.318333	3.14136	1.65139
				-141	34.1433	JL033021_040221_RPA2HFH_Q2_1to5_50B.16837.16837.5	P	1.6265	0.0486787	4.95e-05	//18	10//131	0.7425	0.441176	R.LLPQINILQPIK[1393.71]GESAR.R	4YM7_3_RPAC40	1	AC40	LLPQINILQPIKGESAR	240	//11	7//53	0.884	0.944444	R.YEEFADK[2155.27]VK.L	4YM7_3_RPAC40	1	AC40	YEEFADKVK	288	126.127	125421	127.131	375813	132959	391454	2.94418	0.339653	-1.55787
				-141	33.335	JL033021_040221_RPA2HFH_Q2_1to1_1ug.17053.17053.4	NP	1.6215	0.0491818	0.148	1//18	10//100	0.593	0.470588	R.LLPQINILQPIK[1393.71]GESAR.R	4YM7_3_RPAC40	1	AC40	LLPQINILQPIKGESAR	240	//11	5//42	1.0285	0.666667	R.YEEFADK[2155.27]VK.L	4YM7_3_RPAC40	1	AC40	YEEFADKVK	288	126.127	67329.5	127.13	56826.3	72554.6	54849.6	0.755978	1.32279	0.403585
				-141	35.2697	JL033021_040221_RPA2HFH_Q2_10to1_50B.17251.17251.4	NP	1.6115	0.0532156	1.27e-07	//18	7//100	0.516	0.205882	R.LLPQINILQPIK[1393.71]GESAR.R	4YM7_3_RPAC40	1	AC40	LLPQINILQPIKGESAR	240	//11	6//42	1.0955	0.888889	R.YEEFADK[2155.27]VK.L	4YM7_3_RPAC40	1	AC40	YEEFADKVK	288	126.127	76073.9	127.131	13860.5	82387.1	8023.31	0.0973856	10.2685	3.36015
				-141	32.4988	JL033021_040221_RPA2HFH_Q2_1to5_1ug.17107.17107.5	P	1.56225	0.0591784	0.00391	1//18	9//131	0.639	0.294118	R.LLPQINILQPIK[1393.71]GESAR.R	4YM7_3_RPAC40	1	AC40	LLPQINILQPIKGESAR	240	//11	7//53	0.92325	0.777778	R.YEEFADK[2155.27]VK.L	4YM7_3_RPAC40	1	AC40	YEEFADKVK	288	126.127	19302.5	127.13	59053	20452.7	61547.2	3.00925	0.332308	-1.58941
				-141	35.1923	JL033021_040221_RPA2HFH_Q2_1to10_50B.16927.16927.4	NP	1.56125	0.0485524	0.0413	//18	8//100	0.60475	0.382353	R.LLPQINILQPIK[1393.71]GESAR.R	4YM7_3_RPAC40	1	AC40	LLPQINILQPIKGESAR	240	//11	5//42	0.9565	0.666667	R.YEEFADK[2155.27]VK.L	4YM7_3_RPAC40	1	AC40	YEEFADKVK	288	126.127	16536.8	127.13	94056.3	17168.7	99304.5	5.78405	0.172889	-2.53208
				-141	31.338	JL033021_040221_RPA2HFH_Q2_1to2_50B.16627.16627.5	P	1.53825	0.0500415	0.0121	//18	8//131	0.70075	0.382353	R.LLPQINILQPIK[1393.71]GESAR.R	4YM7_3_RPAC40	1	AC40	LLPQINILQPIKGESAR	240	//11	6//53	0.8375	0.722222	R.YEEFADK[2155.27]VK.L	4YM7_3_RPAC40	1	AC40	YEEFADKVK	288	126.128	88774.8	127.131	119116	95304.7	119673	1.25569	0.796376	-0.328479
				-141	35.4977	JL033021_040221_RPA2HFH_Q2_1to10_50B.16948.16948.5	P	1.52625	0.0450487	4.84e-05	//18	8//131	0.6545	0.382353	R.LLPQINILQPIK[1393.71]GESAR.R	4YM7_3_RPAC40	1	AC40	LLPQINILQPIKGESAR	240	//11	6//53	0.87175	0.722222	R.YEEFADK[2155.27]VK.L	4YM7_3_RPAC40	1	AC40	YEEFADKVK	288	126.127	71172.4	127.13	404594	73893.5	427166	5.78083	0.172985	-2.53128
				-141	35.7879	JL033021_040221_RPA2HFH_Q2_5to1_50B.17028.17028.5	P	1.51825	0.0492802	1.74e-05	//18	8//131	0.661	0.382353	R.LLPQINILQPIK[1393.71]GESAR.R	4YM7_3_RPAC40	1	AC40	LLPQINILQPIKGESAR	240	//11	6//53	0.85725	0.722222	R.YEEFADK[2155.27]VK.L	4YM7_3_RPAC40	1	AC40	YEEFADKVK	288	126.128	199875	127.131	44331.6	216397	29561.6	0.136608	7.32021	2.87189
				-141	36.4305	JL033021_040221_RPA2HFH_Q2_1to5_1ug.17118.17118.4	P	1.483	0.0476627	0.00463	//18	8//100	0.8595	0.382353	R.LLPQINILQPIK[1393.71]GESAR.R	4YM7_3_RPAC40	1	AC40	LLPQINILQPIKGESAR	240	//11	4//42	0.6235	0.444444	R.YEEFADK[2155.27]VK.L	4YM7_3_RPAC40	1	AC40	YEEFADKVK	288	126.127	19305	127.13	66316.6	20396.3	69330.6	3.39918	0.294189	-1.76519
				-141	28.0627	JL033021_040221_RPA2HFH_Q2_1to1_1ug.17615.17615.5	P	1.4485	0.0414337	0.493	//18	9//130	0.86975	0.588235	R.LLPQINILQPIK[1891.01]GESAR.R	4YM7_3_RPAC40	1	AC40	LLPQINILQPIKGESAR	240	//15	9//91	0.57875	0.5	R.EVLRYEEFADK[2155.27]VK.L	4YM7_3_RPAC40	1	AC40	EVLRYEEFADKVK	288	126.128	80649.4	127.131	84964.5	86770.7	83806.3	0.965836	1.03537	0.0501494
				-141	32.8706	JL033021_040221_RPA2HFH_Q2_2to1_1ug.17142.17142.4	NP	1.432	0.0442706	0.0215	//18	7//100	0.4225	0.205882	R.LLPQINILQPIK[1393.71]GESAR.R	4YM7_3_RPAC40	1	AC40	LLPQINILQPIKGESAR	240	//11	5//42	1.0095	0.666667	R.YEEFADK[2155.27]VK.L	4YM7_3_RPAC40	1	AC40	YEEFADKVK	288	126.127	94604.2	127.13	43436.8	102242	38053.2	0.372188	2.68682	1.4259
				-141	30.6609	JL033021_040221_RPA2HFH_Q2_1to2_1ug.17162.17162.5	P	1.41525	0.045513	0.00312	//18	7//131	0.51425	0.205882	R.LLPQINILQPIK[1393.71]GESAR.R	4YM7_3_RPAC40	1	AC40	LLPQINILQPIKGESAR	240	//11	8//53	0.901	0.833333	R.YEEFADK[2155.27]VK.L	4YM7_3_RPAC40	1	AC40	YEEFADKVK	288	126.127	74444.5	127.13	102387	79900	103033	1.28952	0.775482	-0.366834
				-141	33.5629	JL033021_040221_RPA2HFH_Q2_1to5_1ug.17119.17119.5	P	1.408	0.0480251	9.48e-05	//18	8//131	0.54725	0.235294	R.LLPQINILQPIK[1393.71]GESAR.R	4YM7_3_RPAC40	1	AC40	LLPQINILQPIKGESAR	240	//11	7//53	0.86075	0.777778	R.YEEFADK[2155.27]VK.L	4YM7_3_RPAC40	1	AC40	YEEFADKVK	288	126.127	35565.6	127.13	109369	37680.2	114005	3.0256	0.330513	-1.59722
				-141	32.2515	JL033021_040221_RPA2HFH_Q2_1to10_1ug.17213.17213.4	P	1.38225	0.0466598	0.237	1//18	9//100	0.73525	0.352941	R.LLPQINILQPIK[1393.71]GESAR.R	4YM7_3_RPAC40	1	AC40	LLPQINILQPIKGESAR	240	//11	5//42	0.647	0.5	R.YEEFADK[2155.27]VK.L	4YM7_3_RPAC40	1	AC40	YEEFADKVK	288	126.127	10691.7	127.131	67470.1	11046.1	71339.9	6.45841	0.154837	-2.69118
				-141	31.5315	JL033021_040221_RPA2HFH_Q2_1to1_1ug.17040.17040.5	P	1.3545	0.0459854	0.0724	//18	6//131	0.48425	0.176471	R.LLPQINILQPIK[1393.71]GESAR.R	4YM7_3_RPAC40	1	AC40	LLPQINILQPIKGESAR	240	//11	6//53	0.87025	0.722222	R.YEEFADK[2155.27]VK.L	4YM7_3_RPAC40	1	AC40	YEEFADKVK	288	126.127	73642.8	127.131	59570.5	79378.9	57223.5	0.720891	1.38717	0.472147
				-438	78.5915	JL033021_040221_RPA2HFH_Q2_1to10_50B.17581.17581.5	P	1.35125	0.0421574	0.325	1//18	9//130	0.96775	0.441176	R.LLPQINILQPIK[1719.92]GESAR.R	4YM7_3_RPAC40	1	AC40	LLPQINILQPIKGESAR	240	//14	7//85	0.3835	0.458333	R.YEEFADK[2155.27]VKLGR.V	4YM7_3_RPAC40	1	AC40	YEEFADKVKLGR	288	126.127	32720.6	127.13	284667	33169.1	302106	9.10806	0.109793	-3.18714
				-141	27.7284	JL033021_040221_RPA2HFH_Q2_5to1_1ug.17648.17648.5	P	1.3345	0.0407164	0.0012	1//18	8//130	0.8665	0.588235	R.LLPQINILQPIK[1891.01]GESAR.R	4YM7_3_RPAC40	1	AC40	LLPQINILQPIKGESAR	240	//15	8//91	0.468	0.384615	R.EVLRYEEFADK[2155.27]VK.L	4YM7_3_RPAC40	1	AC40	EVLRYEEFADKVK	288	126.128	132657	127.131	39947.3	143538	30897.8	0.215259	4.64556	2.21585
				-141	30.8585	JL033021_040221_RPA2HFH_Q2_1to1_1ug.17043.17043.4	P	1.31725	0.0420974	0.265	1//18	9//100	0.7095	0.5	R.LLPQINILQPIK[1393.71]GESAR.R	4YM7_3_RPAC40	1	AC40	LLPQINILQPIKGESAR	240	//11	5//42	0.60775	0.5	R.YEEFADK[2155.27]VK.L	4YM7_3_RPAC40	1	AC40	YEEFADKVK	288	126.127	59479.7	127.131	49859.7	64098.4	48089	0.750237	1.33291	0.414581
				-141	33.0793	JL033021_040221_RPA2HFH_Q2_5to1_1ug.17080.17080.5	P	1.2995	0.0462637	0.00016	//18	7//131	0.46675	0.205882	R.LLPQINILQPIK[1393.71]GESAR.R	4YM7_3_RPAC40	1	AC40	LLPQINILQPIKGESAR	240	//11	6//53	0.83275	0.722222	R.YEEFADK[2155.27]VK.L	4YM7_3_RPAC40	1	AC40	YEEFADKVK	288	126.127	111180	127.13	25349.5	120365	17183.1	0.142758	7.00488	2.80836
				-141	31.8217	JL033021_040221_RPA2HFH_Q2_1to1_50B.17101.17101.5	P	1.244	0.0418109	1.93e-05	//18	6//131	0.4115	0.176471	R.LLPQINILQPIK[1393.71]GESAR.R	4YM7_3_RPAC40	1	AC40	LLPQINILQPIKGESAR	240	//11	6//53	0.8325	0.722222	R.YEEFADK[2155.27]VK.L	4YM7_3_RPAC40	1	AC40	YEEFADKVK	288	126.127	74605.3	127.13	59115.1	80426.4	56649.1	0.70436	1.41973	0.505615
				-141	31.153	JL033021_040221_RPA2HFH_Q2_1to1_50B.17108.17108.3	P	1.21375	0.0454946	3.48e-06	//18	7//69	0.804	0.352941	R.LLPQINILQPIK[1393.71]GESAR.R	4YM7_3_RPAC40	1	AC40	LLPQINILQPIKGESAR	240	//11	5//31	0.40975	0.5	R.YEEFADK[2155.27]VK.L	4YM7_3_RPAC40	1	AC40	YEEFADKVK	288	126.127	27295.7	127.13	22848.3	29415.5	22033.4	0.74904	1.33504	0.416885
				-141	29.8473	JL033021_040221_RPA2HFH_Q2_2to1_100B.18900.18900.6	P	1.165	0.0370984	0.0879	//18	7//130	0.56475	0.352941	R.LLPQINILQPIK[1891.01]GESAR.R	4YM7_3_RPAC40	1	AC40	LLPQINILQPIKGESAR	240	//15	5//91	0.60025	0.269231	R.EVLRYEEFADK[2155.27]VK.L	4YM7_3_RPAC40	1	AC40	EVLRYEEFADKVK	288	126.127	92541.6	127.13	48185.6	99966.6	43327.1	0.433416	2.30725	1.20618
				-141	28.8147	JL033021_040221_RPA2HFH_Q2_2to1_100B.18860.18860.5	P	1.16275	0.0341759	0.0243	1//18	8//130	0.761	0.588235	R.LLPQINILQPIK[1891.01]GESAR.R	4YM7_3_RPAC40	1	AC40	LLPQINILQPIKGESAR	240	//15	5//91	0.40175	0.269231	R.EVLRYEEFADK[2155.27]VK.L	4YM7_3_RPAC40	1	AC40	EVLRYEEFADKVK	288	126.127	113680	127.131	60113.2	122794	54210.7	0.441477	2.26512	1.17959
				-141	33.0765	JL033021_040221_RPA2HFH_Q2_2to1_1ug.17686.17686.5	P	1.15725	0.034642	0.0313	1//18	8//130	0.692	0.411765	R.LLPQINILQPIK[1891.01]GESAR.R	4YM7_3_RPAC40	1	AC40	LLPQINILQPIKGESAR	240	//15	8//91	0.46525	0.384615	R.EVLRYEEFADK[2155.27]VK.L	4YM7_3_RPAC40	1	AC40	EVLRYEEFADKVK	288	126.127	118648	127.131	64528.8	128145	58496.6	0.456488	2.19064	1.13135
				-142	30.8737	JL033021_040221_RPA2HFH_Q2_1to10_1ug.17207.17207.5	P	1.129	0.042442	0.292	//18	7//131	0.5125	0.205882	R.LLPQINILQPIK[1393.71]GESAR.R	4YM7_3_RPAC40	1	AC40	LLPQINILQPIKGESAR	240	//11	6//53	0.6165	0.555556	R.YEEFADK[2155.27]VK.L	4YM7_3_RPAC40	1	AC40	YEEFADKVK	288	126.127	12980.3	127.13	77056	13450	81406.5	6.05254	0.16522	-2.59754
				-141	30.5696	JL033021_040221_RPA2HFH_Q2_1to10_1ug.17764.17764.5	P	1.1105	0.0341671	0.105	1//18	8//130	0.607	0.411765	R.LLPQINILQPIK[1891.01]GESAR.R	4YM7_3_RPAC40	1	AC40	LLPQINILQPIKGESAR	240	//15	9//91	0.5035	0.423077	R.EVLRYEEFADK[2155.27]VK.L	4YM7_3_RPAC40	1	AC40	EVLRYEEFADKVK	288	126.128	19348.4	127.131	140905	19836.7	149254	7.52415	0.132905	-2.91153
				-141	26.9393	JL033021_040221_RPA2HFH_Q2_10to1_1ug.17715.17715.6	P	1.0975	0.0395204	0.0118	//18	6//130	0.36775	0.176471	R.LLPQINILQPIK[1891.01]GESAR.R	4YM7_3_RPAC40	1	AC40	LLPQINILQPIKGESAR	240	//15	8//91	0.72975	0.461538	R.EVLRYEEFADK[2155.27]VK.L	4YM7_3_RPAC40	1	AC40	EVLRYEEFADKVK	288	126.127	75508.5	127.13	15818.5	81758	10172.2	0.124419	8.03736	3.00672
				-141	32.0816	JL033021_040221_RPA2HFH_Q2_10to1_50B.17263.17263.3	P	1.0945	0.0427531	0.000196	//18	7//69	0.8045	0.352941	R.LLPQINILQPIK[1393.71]GESAR.R	4YM7_3_RPAC40	1	AC40	LLPQINILQPIKGESAR	240	//11	3//31	0.29	0.277778	R.YEEFADK[2155.27]VK.L	4YM7_3_RPAC40	1	AC40	YEEFADKVK	288	126.127	38185.7	127.13	6521.51	41358.1	3560.3	0.0860846	11.6165	3.5381
				-141	28.1462	JL033021_040221_RPA2HFH_Q2_1to5_D.18542.18542.5	P	1.0785	0.0399489	0.0243	1//18	7//130	0.56975	0.382353	R.LLPQINILQPIK[1891.01]GESAR.R	4YM7_3_RPAC40	1	AC40	LLPQINILQPIKGESAR	240	//15	6//91	0.50875	0.307692	R.EVLRYEEFADK[2155.27]VK.L	4YM7_3_RPAC40	1	AC40	EVLRYEEFADKVK	288	126.127	13365.6	127.13	46498.8	14116.4	48627.4	3.44474	0.290298	-1.78439
				-141	34.8205	JL033021_040221_RPA2HFH_Q2_10to1_50B.17243.17243.5	P	1.07325	0.0361193	0.0119	1//18	8//131	0.5005	0.264706	R.LLPQINILQPIK[1393.71]GESAR.R	4YM7_3_RPAC40	1	AC40	LLPQINILQPIKGESAR	240	//11	5//53	0.57275	0.5	R.YEEFADK[2155.27]VK.L	4YM7_3_RPAC40	1	AC40	YEEFADKVK	288	126.127	63868	127.13	9553.32	69185.2	4503.55	0.0650941	15.3624	3.94133
				-141	31.1509	JL033021_040221_RPA2HFH_Q2_1to5_100B.19011.19011.6	P	1.068	0.0331744	0.233	1//18	7//130	0.551	0.294118	R.LLPQINILQPIK[1891.01]GESAR.R	4YM7_3_RPAC40	1	AC40	LLPQINILQPIKGESAR	240	//15	5//91	0.517	0.269231	R.EVLRYEEFADK[2155.27]VK.L	4YM7_3_RPAC40	1	AC40	EVLRYEEFADKVK	288	126.127	24637.1	127.13	99926.8	25905.5	104868	4.0481	0.247029	-2.01725
				-141	27.6082	JL033021_040221_RPA2HFH_Q2_1to2_50B.16626.16626.4	P	1.06	0.0322993	0.26	1//18	9//100	0.52925	0.294118	R.LLPQINILQPIK[1393.71]GESAR.R	4YM7_3_RPAC40	1	AC40	LLPQINILQPIKGESAR	240	1//11	5//42	0.53075	0.5	R.YEEFADK[2155.27]VK.L	4YM7_3_RPAC40	1	AC40	YEEFADKVK	288	126.128	68521.5	127.131	105787	73449	107208	1.45963	0.685104	-0.545605
				-141	22.2132	JL033021_040221_RPA2HFH_Q2_1to2_D.18206.18206.5	P	1.047	0.0343054	0.000174	//18	5//130	0.52475	0.294118	R.LLPQINILQPIK[1891.01]GESAR.R	4YM7_3_RPAC40	1	AC40	LLPQINILQPIKGESAR	240	//15	5//91	0.52225	0.346154	R.EVLRYEEFADK[2155.27]VK.L	4YM7_3_RPAC40	1	AC40	EVLRYEEFADKVK	288	126.127	26401.5	127.13	44019.7	28273.6	44800.6	1.58454	0.631099	-0.664061
				-141	31.6324	JL033021_040221_RPA2HFH_Q2_1to1_50B.17090.17090.4	P	1.01275	0.0344731	1.12e-05	//18	6//100	0.3635	0.176471	R.LLPQINILQPIK[1393.71]GESAR.R	4YM7_3_RPAC40	1	AC40	LLPQINILQPIKGESAR	240	1//11	5//42	0.64925	0.555556	R.YEEFADK[2155.27]VK.L	4YM7_3_RPAC40	1	AC40	YEEFADKVK	288	126.127	33277.6	127.131	29487	35848.7	28610.4	0.798087	1.253	0.325382
				-141	31.4888	JL033021_040221_RPA2HFH_Q2_1to5_1ug.17685.17685.5	P	0.9975	0.0290241	0.0138	1//18	7//130	0.5	0.382353	R.LLPQINILQPIK[1891.01]GESAR.R	4YM7_3_RPAC40	1	AC40	LLPQINILQPIKGESAR	240	//15	8//91	0.4975	0.384615	R.EVLRYEEFADK[2155.27]VK.L	4YM7_3_RPAC40	1	AC40	EVLRYEEFADKVK	288	126.128	24500.8	127.131	100213	25755.3	105187	4.08408	0.244853	-2.03001
				-141	28.4805	JL033021_040221_RPA2HFH_Q2_1to2_1ug.17731.17731.5	P	0.99	0.0296829	0.0191	1//18	6//130	0.38575	0.205882	R.LLPQINILQPIK[1891.01]GESAR.R	4YM7_3_RPAC40	1	AC40	LLPQINILQPIKGESAR	240	//15	9//91	0.60425	0.5	R.EVLRYEEFADK[2155.27]VK.L	4YM7_3_RPAC40	1	AC40	EVLRYEEFADKVK	288	126.127	54892.5	127.131	99732.3	58718.1	101943	1.73615	0.575987	-0.795892
				-141	30.1518	JL033021_040221_RPA2HFH_Q2_2to1_D.18244.18244.5	P	0.91725	0.0296595	0.0117	1//18	6//130	0.3805	0.352941	R.LLPQINILQPIK[1891.01]GESAR.R	4YM7_3_RPAC40	1	AC40	LLPQINILQPIKGESAR	240	//15	7//91	0.53675	0.423077	R.EVLRYEEFADK[2155.27]VK.L	4YM7_3_RPAC40	1	AC40	EVLRYEEFADKVK	288	126.128	66620	127.131	35344.3	71959.9	31893.6	0.443214	2.25625	1.17392
				-141	27.8955	JL033021_040221_RPA2HFH_Q2_1to5_100B.18967.18967.5	P	0.8265	0.025192	0.0565	1//18	7//130	0.36125	0.235294	R.LLPQINILQPIK[1891.01]GESAR.R	4YM7_3_RPAC40	1	AC40	LLPQINILQPIKGESAR	240	//15	6//91	0.46525	0.307692	R.EVLRYEEFADK[2155.27]VK.L	4YM7_3_RPAC40	1	AC40	EVLRYEEFADKVK	288	126.128	25006.6	127.131	94477.2	26350.4	98995.2	3.75687	0.266179	-1.90953
				-142	30.0013	JL033021_040221_RPA2HFH_Q2_2to1_100B.18946.18946.5	P	0.8	0.0246834	0.0715	1//18	7//130	0.423	0.235294	R.LLPQINILQPIK[1891.01]GESAR.R	4YM7_3_RPAC40	1	AC40	LLPQINILQPIKGESAR	240	//15	5//91	0.377	0.192308	R.EVLRYEEFADK[2155.27]VK.L	4YM7_3_RPAC40	1	AC40	EVLRYEEFADKVK	288	126.127	88838.4	127.13	47715.3	95954.4	43155.6	0.449751	2.22345	1.1528
				-141	28.5437	JL033021_040221_RPA2HFH_Q2_5to1_1ug.17656.17656.6	P	0.7955	0.0293234	0.34	//18	6//130	0.37925	0.176471	R.LLPQINILQPIK[1891.01]GESAR.R	4YM7_3_RPAC40	1	AC40	LLPQINILQPIKGESAR	240	//15	5//91	0.41625	0.269231	R.EVLRYEEFADK[2155.27]VK.L	4YM7_3_RPAC40	1	AC40	EVLRYEEFADKVK	288	126.127	58671.2	127.131	16414.4	63493.6	12322.3	0.194072	5.15273	2.36534
				-143	28.5103	JL033021_040221_RPA2HFH_Q2_10to1_1ug.17723.17723.6	P	0.78775	0.0267138	0.095	//18	7//130	0.43925	0.205882	R.LLPQINILQPIK[1891.01]GESAR.R	4YM7_3_RPAC40	1	AC40	LLPQINILQPIKGESAR	240	//15	6//91	0.3485	0.307692	R.EVLRYEEFADK[2155.27]VK.L	4YM7_3_RPAC40	1	AC40	EVLRYEEFADKVK	288	126.127	85784.8	127.13	19007.1	92876.3	12666.5	0.13638	7.33244	2.87429
				-141	30.6886	JL033021_040221_RPA2HFH_Q2_10to1_1ug.17196.17196.3	P	0.685	0.0198761	0.651	//18	6//69	0.41525	0.323529	R.LLPQINILQPIK[1393.71]GESAR.R	4YM7_3_RPAC40	1	AC40	LLPQINILQPIKGESAR	240	//11	3//31	0.26975	0.277778	R.YEEFADK[2155.27]VK.L	4YM7_3_RPAC40	1	AC40	YEEFADKVK	288	126.127	96999.7	127.13	17983.5	105047	10562.8	0.100553	9.94497	3.31397
				-141	28.8147	JL033021_040221_RPA2HFH_Q2_10to1_100B.19283.19283.5	P	0.56375	0.0226633	0.161	//18	2//130	0.1585	0.0588235	R.LLPQINILQPIK[1891.01]GESAR.R	4YM7_3_RPAC40	1	AC40	LLPQINILQPIKGESAR	240	//15	3//91	0.40525	0.115385	R.EVLRYEEFADK[2155.27]VK.L	4YM7_3_RPAC40	1	AC40	EVLRYEEFADKVK	288	126.127	19660.4	127.13	4640.29	21283.4	3207.47	0.150703	6.63556	2.73022
				-143	36.2054	JL033021_040221_RPA2HFH_Q2_1to5_100B.19026.19026.4	P	0.562	0.0201741	0.271	//18	4//99	0.299	0.117647	R.LLPQINILQPIK[1891.01]GESAR.R	4YM7_3_RPAC40	1	AC40	LLPQINILQPIKGESAR	240	//15	3//71	0.263	0.115385	R.EVLRYEEFADK[2155.27]VK.L	4YM7_3_RPAC40	1	AC40	EVLRYEEFADKVK	288	126.127	11922.5	127.13	49519.5	12526.9	51993.9	4.15059	0.24093	-2.05332
				-142	32.2515	JL033021_040221_RPA2HFH_Q2_1to10_50B.17037.17037.4	P	0.53375	0.0189216	0.371	//18	6//100	0.212	0.176471	R.LLPQINILQPIK[1393.71]GESAR.R	4YM7_3_RPAC40	1	AC40	LLPQINILQPIKGESAR	240	//11	3//42	0.32175	0.277778	R.YEEFADK[2155.27]VK.L	4YM7_3_RPAC40	1	AC40	YEEFADKVK	288	126.127	14041.3	127.13	88861.6	14504.6	93961.9	6.47809	0.154366	-2.69557
				-142	33.679	JL033021_040221_RPA2HFH_Q2_2to1_100B.18259.18259.5	P	0.43175	0.0141046	0.498	//18	3//131	0.154	0.0882353	R.LLPQINILQPIK[1393.71]GESAR.R	4YM7_3_RPAC40	1	AC40	LLPQINILQPIKGESAR	240	//11	3//53	0.27775	0.277778	R.YEEFADK[2155.27]VK.L	4YM7_3_RPAC40	1	AC40	YEEFADKVK	288	126.127	56824	127.13	22637.5	61439.8	19156.7	0.311797	3.20722	1.68132
				-141	32.3289	JL033021_040221_RPA2HFH_Q2_10to1_100B.18641.18641.4	P	0.322	0.0134804	0.204	//18	3//100	0.1615	0.0882353	R.LLPQINILQPIK[1393.71]GESAR.R	4YM7_3_RPAC40	1	AC40	LLPQINILQPIKGESAR	240	//11	2//42	0.1605	0.222222	R.YEEFADK[2155.27]VK.L	4YM7_3_RPAC40	1	AC40	YEEFADKVK	288	126.127	25532.1	127.13	4594.9	27651.4	2631.72	0.0951749	10.507	3.39327
				-142	41.0739	JL033021_040221_RPA2HFH_Q2_10to1_100B.18660.18660.4	P	0.27775	0.0103343	0.226	//18	1//100	0.05725	0.0294118	R.LLPQINILQPIK[1393.71]GESAR.R	4YM7_3_RPAC40	1	AC40	LLPQINILQPIKGESAR	240	//11	2//42	0.2205	0.222222	R.YEEFADK[2155.27]VK.L	4YM7_3_RPAC40	1	AC40	YEEFADKVK	288	126.127	26395.5	127.13	5352.84	28581.5	3366.41	0.117783	8.4902	3.0858
	8	AC40:240---AC40:290	2.422
				-438	83.0238	JL033021_040221_RPA2HFH_Q2_1to10_50B.17576.17576.6	P	2.422	0.0835345	0.31	1//18	14//130	1.915	0.823529	R.LLPQINILQPIK[1719.92]GESAR.R	4YM7_3_RPAC40	1	AC40	LLPQINILQPIKGESAR	240	//14	7//82	0.507	0.458333	R.YEEFADKVK[2155.27]LGR.V	4YM7_3_RPAC40	1	AC40	YEEFADKVKLGR	290	126.127	32091	127.13	259949	32687.4	275676	8.4337	0.118572	-3.07617
				-438	81.6561	JL033021_040221_RPA2HFH_Q2_1to10_50B.17618.17618.6	P	2.30275	0.0716709	0.135	1//18	14//130	2.034	0.823529	R.LLPQINILQPIK[1719.92]GESAR.R	4YM7_3_RPAC40	1	AC40	LLPQINILQPIKGESAR	240	//14	6//82	0.26875	0.416667	R.YEEFADKVK[2155.27]LGR.V	4YM7_3_RPAC40	1	AC40	YEEFADKVKLGR	290	126.128	46128.2	127.131	397432	46792.1	421740	9.01306	0.11095	-3.17202
				-438	81.9718	JL033021_040221_RPA2HFH_Q2_5to1_1ug.17730.17730.6	P	2.30025	0.0770823	0.177	1//18	12//130	1.83125	0.764706	R.LLPQINILQPIK[1719.92]GESAR.R	4YM7_3_RPAC40	1	AC40	LLPQINILQPIKGESAR	240	//14	6//82	0.469	0.541667	R.YEEFADKVK[2155.27]LGR.V	4YM7_3_RPAC40	1	AC40	YEEFADKVKLGR	290	126.127	230258	127.131	76025.8	249089	60796.9	0.244077	4.09707	2.03459
				-438	81.4846	JL033021_040221_RPA2HFH_Q2_1to2_1ug.17777.17777.5	P	1.68725	0.0535321	0.519	1//18	11//130	1.39575	0.617647	R.LLPQINILQPIK[1719.92]GESAR.R	4YM7_3_RPAC40	1	AC40	LLPQINILQPIKGESAR	240	//14	6//82	0.2915	0.458333	R.YEEFADKVK[2155.27]LGR.V	4YM7_3_RPAC40	1	AC40	YEEFADKVKLGR	290	126.127	80973.4	127.13	170021	86430.3	174922	2.02385	0.494108	-1.0171
	9	AC40:154---AC40:154	4.034
				-1	14.2805	JL033021_040221_RPA2HFH_Q2_5to1_1ug.12214.12214.6	N	4.034	0.15174		//19	8//99	2.017	0.78125	K.GSTDPK[2341.13]ELYNNAHVYAR.D	4YM7_3_RPAC40	1	AC40	GSTDPKELYNNAHVYAR	154	//19	8//99	2.017	0.78125	K.GSTDPK[2341.13]ELYNNAHVYAR.D	4YM7_3_RPAC40	1	AC40	GSTDPKELYNNAHVYAR	154	126.127	103523	127.13	26701.2	112050	19319	0.172414	5.79999	2.53605
12	RPA1
	1	RPA1:267---RPA1:555	2.92125
				-141	34.1673	JL033021_040221_RPA2HFH_Q2_5to1_100B.13181.13181.4	P	2.92125	0.11205	0.662	//18	11//137	2.81725	0.547619	R.K[984.61]ALANQLLTPSSNVSTHTLNK.K	4YM7_1_RPA1	1	RPA1	KALANQLLTPSSNVSTHTLNK	555	//6	2//24	0.104	0.166667	R.VK[2502.38]GFIR.Q	4YM7_1_RPA1	1	RPA1	VKGFIR	267	126.127	65178.1	127.13	18180.5	70535.8	13630.7	0.193245	5.17477	2.3715
				-141	30.4571	JL033021_040221_RPA2HFH_Q2_10to1_100B.13260.13260.4	P	2.27975	0.090066	0.661	//18	9//137	2.2045	0.428571	R.K[984.61]ALANQLLTPSSNVSTHTLNK.K	4YM7_1_RPA1	1	RPA1	KALANQLLTPSSNVSTHTLNK	555	//6	2//24	0.07525	0.166667	R.VK[2502.38]GFIR.Q	4YM7_1_RPA1	1	RPA1	VKGFIR	267	126.127	42288.1	127.13	7853.91	45796.3	4619.79	0.100877	9.91307	3.30933
	2	RPA1:267---RPA1:276	1.5685
				-141	63.1591	JL033021_040221_RPA2HFH_Q2_2to1_50B.09345.09345.4	P	1.5685	0.0649227	0.0692	//9	3//33	0.30175	0.416667	R.Q[111.03]DM[147.04]IK[984.61]K.Q	4YM7_1_RPA1	1	RPA1	QDMIKK	276	//6	6//26	1.26675	1.16667	R.VK[1026.54]GFIR.Q	4YM7_1_RPA1	1	RPA1	VKGFIR	267	126.127	190393	127.13	78338.2	205838	66853.7	0.324788	3.07894	1.62243
				-141	62.4041	JL033021_040221_RPA2HFH_Q2_2to1_50B.09359.09359.4	P	1.54325	0.0672133	0.0128	//9	2//33	0.2035	0.166667	R.Q[111.03]DM[147.04]IK[984.61]K.Q	4YM7_1_RPA1	1	RPA1	QDMIKK	276	//6	6//26	1.33975	1.16667	R.VK[1026.54]GFIR.Q	4YM7_1_RPA1	1	RPA1	VKGFIR	267	126.127	183890	127.13	76911.8	198797	65908.9	0.331538	3.01625	1.59275
				302	-182.683	JL033021_040221_RPA2HFH_Q2_1to2_50B.08042.08042.3	P	0.599	0.0266524	0.0964	//8	1//23	0.0355	0.0833333	R.QDM[147.04]IK[984.61]K.Q	4YM7_1_RPA1	1	RPA1	QDMIKK	276	//6	3//22	0.5635	0.416667	R.VK[1043.57]GFIR.Q	4YM7_1_RPA1	1	RPA1	VKGFIR	267	126.127	91090.9	127.13	126002	97760.4	126843	1.29749	0.770717	-0.375727
	3	RPA1:1334---RPA1:504	11.992
				-437	53.2776	JL033021_040221_RPA2HFH_Q2_1to5_1ug.21311.21311.5	P	11.992	0.254591	0.429	//	41//322	11.9688	1.32051	R.SVISPDPNIETNEIGVPPVFAVK[1038.64]LTYPEPVTAYNIAELR.Q	4YM7_1_RPA1	1	RPA1	SVISPDPNIETNEIGVPPVFAVKLTYPEPVTAYNIAELR	504	//8	1//32	0.02325	0.0833333	K.EIK[4518.39]KQK.R	4YM7_1_RPA1	1	RPA1	EIKKQK	1334	126.127	26710.8	127.13	103505	28125.2	108516	3.85832	0.25918	-1.94797
	4	RPA1:450---RPA1:462	1.56375
				-141	53.3554	JL033021_040221_RPA2HFH_Q2_5to1_50B.11841.11841.4	P	1.56375	0.072237	0.342	//13	7//61	1.48175	0.772727	R.TSGK[964.56]VPIPGVK.Q	4YM7_1_RPA1	1	RPA1	TSGKVPIPGVK	450	//9	2//34	0.082	0.166667	K.Q[111.03]ALEK[1347.81]K.E	4YM7_1_RPA1	1	RPA1	QALEKK	462	126.127	42042.6	127.13	9241.76	45518.8	6129.01	0.134648	7.42678	2.89274
	5	RPA1:450---RPA1:463	1.03225
				-141	46.9037	JL033021_040221_RPA2HFH_Q2_2to1_50B.12138.12138.4	P	1.03225	0.0496835	0.0468	//13	8//61	0.77975	0.545455	R.TSGK[1014.59]VPIPGVK.Q	4YM7_1_RPA1	1	RPA1	TSGKVPIPGVK	450	//7	4//32	0.2525	0.666667	K.K[1347.81]EGLFR.K	4YM7_1_RPA1	1	RPA1	KEGLFR	463	126.127	65044.9	127.13	28660.8	70306.1	24873.1	0.353783	2.82659	1.49906
				-141	54.0984	JL033021_040221_RPA2HFH_Q2_1to10_50B.12660.12660.4	P	0.4985	0.03185	0.523	//13	5//61	0.37525	0.227273	R.TSGK[1014.59]VPIPGVK.Q	4YM7_1_RPA1	1	RPA1	TSGKVPIPGVK	450	//7	3//32	0.12325	0.25	K.K[1347.81]EGLFR.K	4YM7_1_RPA1	1	RPA1	KEGLFR	463	126.127	8197.3	127.131	46233.7	8513.68	48807.2	5.7328	0.174435	-2.51924
	6	RPA1:330---RPA1:469	0.3325
				-438	70.1132	JL033021_040221_RPA2HFH_Q2_10to1_100B.13165.13165.5	P	0.3325	0.0128092	0.254	1//15	4//152	0.3325	0.111111	R.K[1596.83]EQC[160.03]VLQYVFHSRPNLSR.K	4YM7_1_RPA1	1	RPA1	KEQCVLQYVFHSRPNLSR	330	//14	//84	0	0	K.E[111.03]GLFRK[2526.32]HM[147.04]MGK.R	4YM7_1_RPA1	1	RPA1	EGLFRKHMMGK	469	126.127	41828.4	127.13	6582.33	45308	3298.45	0.0728006	13.7361	3.77991
	7	RPA1:330---RPA1:604	1.42075
				-141	17.8092	JL033021_040221_RPA2HFH_Q2_10to1_100B.15394.15394.5	P	1.42075	0.0409656	0.092	//15	10//150	1.333	0.416667	R.K[1994.04]EQC[160.03]VLQYVFHSRPNLSR.K	4YM7_1_RPA1	1	RPA1	KEQCVLQYVFHSRPNLSR	330	//17	2//113	0.08775	0.0666667	K.ASM[147.04]M[147.04]GHK[2526.32]VRVLPNEK.T	4YM7_1_RPA1	1	RPA1	ASMMGHKVRVLPNEK	604	126.127	43375.6	127.13	8342.17	46971.7	5045.36	0.107413	9.30987	3.21876
	8	RPA1:1495---RPA1:474
				-141	36.3457	JL033021_040221_RPA2HFH_Q2_10to1_100B.18330.18330.5	P	0	0	0.255	//15	//96	0	0	R.KHM[147.04]M[147.04]GK[1741.04]RVNYAAR.S	4YM7_1_RPA1	1	RPA1	KHMMGKRVNYAAR	474	//13	//90	0	0	R.K[1858.97]SIIRQIPHIDR.C	4YM7_1_RPA1	1	RPA1	KSIIRQIPHIDR	1495	126.127	34669.2	127.13	6720.06	37543	4088.75	0.108908	9.18203	3.19881
	9	RPA1:1363---RPA1:1376	8.001
				0	3.7522	JL033021_040221_RPA2HFH_Q2_2to1_50B.05256.05256.4	N	8.001	0.310008		//16	15//71	6.54425	1.76923	R.LQTDVANSSSNSK[2006.98]R.L	4YM7_1_RPA1	1	RPA1	LQTDVANSSSNSKR	1363	//15	9//68	1.45675	0.791667	R.LEEDNDEEQSHK[1913.02]K.T	4YM7_1_RPA1	1	RPA1	LEEDNDEEQSHKK	1376	126.127	44427	127.131	17014.5	48041.3	14244.1	0.296498	3.37271	1.75391
				0	1.29971	JL033021_040221_RPA2HFH_Q2_1to2_50B.05559.05559.4	N	7.0955	0.426977		//16	13//71	5.7	1.57692	R.LQTDVANSSSNSK[2006.97]R.L	4YM7_1_RPA1	1	RPA1	LQTDVANSSSNSKR	1363	//15	8//68	1.3955	0.666667	R.LEEDNDEEQSHK[1913.01]K.T	4YM7_1_RPA1	1	RPA1	LEEDNDEEQSHKK	1376	126.127	9925.1	127.13	13175.2	10656.3	13227.3	1.24126	0.805632	-0.311808
				0	2.59809	JL033021_040221_RPA2HFH_Q2_1to2_50B.05564.05564.4	N	6.9055	0.330676		//16	12//71	5.14375	1.30769	R.LQTDVANSSSNSK[2006.97]R.L	4YM7_1_RPA1	1	RPA1	LQTDVANSSSNSKR	1363	//15	9//68	1.76175	0.916667	R.LEEDNDEEQSHK[1913.01]K.T	4YM7_1_RPA1	1	RPA1	LEEDNDEEQSHKK	1376	126.127	21366.9	127.13	24580	22971.8	24421.3	1.0631	0.940645	-0.0882783
				0	0.578383	JL033021_040221_RPA2HFH_Q2_10to1_1ug.05527.05527.4	N	6.74025	0.390705		//16	16//71	5.7445	1.80769	R.LQTDVANSSSNSK[2006.96]R.L	4YM7_1_RPA1	1	RPA1	LQTDVANSSSNSKR	1363	//15	6//68	0.99575	0.583333	R.LEEDNDEEQSHK[1913.01]K.T	4YM7_1_RPA1	1	RPA1	LEEDNDEEQSHKK	1376	126.127	14587.5	127.13	1954.84	15803.8	785.203	0.0496844	20.1271	4.33106
				-141	33.8457	JL033021_040221_RPA2HFH_Q2_1to5_50B.05593.05593.4	NP	3.699	0.15086	0.309	//16	8//76	2.7435	0.678571	R.LQTDVANSSSNSK[1865.86]R.L	4YM7_1_RPA1	1	RPA1	LQTDVANSSSNSKR	1363	//15	5//73	0.9555	0.384615	R.LEEDNDEEQSHK[1771.91]K.T	4YM7_1_RPA1	1	RPA1	LEEDNDEEQSHKK	1376	126.127	15763.2	127.131	40965.9	16761.5	42483.2	2.53456	0.394546	-1.34174
				-141	33.9963	JL033021_040221_RPA2HFH_Q2_10to1_1ug.05500.05500.4	NP	3.356	0.153628	0.511	//16	8//76	2.54475	0.678571	R.LQTDVANSSSNSK[1865.86]R.L	4YM7_1_RPA1	1	RPA1	LQTDVANSSSNSKR	1363	//15	5//73	0.81125	0.384615	R.LEEDNDEEQSHK[1771.91]K.T	4YM7_1_RPA1	1	RPA1	LEEDNDEEQSHKK	1376	126.127	35026.7	127.13	4887.09	37945.6	2092.47	0.055144	18.1343	4.18065
				-141	32.8672	JL033021_040221_RPA2HFH_Q2_5to1_50B.05631.05631.4	NP	3.151	0.154631	0.00886	1//16	10//76	2.5775	0.75	R.LQTDVANSSSNSK[1865.86]R.L	4YM7_1_RPA1	1	RPA1	LQTDVANSSSNSKR	1363	//15	5//73	0.5735	0.192308	R.LEEDNDEEQSHK[1771.91]K.T	4YM7_1_RPA1	1	RPA1	LEEDNDEEQSHKK	1376	126.127	31907	127.13	6529.24	34549.1	4132.23	0.119605	8.36088	3.06365
				-141	32.2569	JL033021_040221_RPA2HFH_Q2_1to5_50B.05605.05605.6	P	2.8115	0.0987912	0.548	//16	5//96	0.8745	0.464286	R.LQTDVANSSSNSK[1865.86]R.L	4YM7_1_RPA1	1	RPA1	LQTDVANSSSNSKR	1363	//15	7//93	1.937	0.692308	R.LEEDNDEEQSHK[1771.91]K.T	4YM7_1_RPA1	1	RPA1	LEEDNDEEQSHKK	1376	126.127	34942	127.131	94722.2	37123.1	98365.8	2.64972	0.377398	-1.40584
				-141	33.3524	JL033021_040221_RPA2HFH_Q2_1to1_50B.05653.05653.5	P	2.60325	0.100293	0.0226	//16	9//96	1.60925	0.571429	R.LQTDVANSSSNSK[1865.86]R.L	4YM7_1_RPA1	1	RPA1	LQTDVANSSSNSKR	1363	//15	5//93	0.994	0.384615	R.LEEDNDEEQSHK[1771.91]K.T	4YM7_1_RPA1	1	RPA1	LEEDNDEEQSHKK	1376	126.127	31726.5	127.13	21387.2	34232.4	20070	0.586287	1.70565	0.770322
				-141	29.5553	JL033021_040221_RPA2HFH_Q2_1to10_50B.05655.05655.4	NP	2.38975	0.129005	0.00147	//16	6//76	1.55025	0.5	R.LQTDVANSSSNSK[1865.86]R.L	4YM7_1_RPA1	1	RPA1	LQTDVANSSSNSKR	1363	//15	4//73	0.8395	0.346154	R.LEEDNDEEQSHK[1771.91]K.T	4YM7_1_RPA1	1	RPA1	LEEDNDEEQSHKK	1376	126.127	5052.43	127.13	21480.2	5304.5	22564.3	4.2538	0.235084	-2.08875
				-141	33.921	JL033021_040221_RPA2HFH_Q2_5to1_1ug.05521.05521.4	NP	2.22475	0.12929	0.302	//16	5//76	1.53275	0.464286	R.LQTDVANSSSNSK[1865.86]R.L	4YM7_1_RPA1	1	RPA1	LQTDVANSSSNSKR	1363	//15	4//73	0.692	0.307692	R.LEEDNDEEQSHK[1771.91]K.T	4YM7_1_RPA1	1	RPA1	LEEDNDEEQSHKK	1376	126.127	22986	127.13	4829.72	24888.3	3111.93	0.125036	7.99771	2.99959
				-141	30.6238	JL033021_040221_RPA2HFH_Q2_1to10_50B.05650.05650.5	P	2.18125	0.0937869	0.0411	//16	8//96	1.65225	0.535714	R.LQTDVANSSSNSK[1865.86]R.L	4YM7_1_RPA1	1	RPA1	LQTDVANSSSNSKR	1363	//15	3//93	0.529	0.192308	R.LEEDNDEEQSHK[1771.91]K.T	4YM7_1_RPA1	1	RPA1	LEEDNDEEQSHKK	1376	126.127	8732.41	127.13	39521.3	9148.58	41566.4	4.54348	0.220096	-2.1838
				-141	31.964	JL033021_040221_RPA2HFH_Q2_1to1_50B.05663.05663.4	NP	2.1535	0.128487	2.76e-05	//16	5//76	1.60325	0.464286	R.LQTDVANSSSNSK[1865.86]R.L	4YM7_1_RPA1	1	RPA1	LQTDVANSSSNSKR	1363	//15	4//73	0.55025	0.230769	R.LEEDNDEEQSHK[1771.91]K.T	4YM7_1_RPA1	1	RPA1	LEEDNDEEQSHKK	1376	126.127	16037.1	127.13	9705.32	17312.8	8960.35	0.517556	1.93216	0.950212
				1552	93.3135	JL033021_040221_RPA2HFH_Q2_2to1_1ug.05487.05487.3	P	2.1395	0.0876647	0.657	//16	5//56	0.8955	0.464286	R.LQTDVANSSSNSK[1865.86]R.L	4YM7_1_RPA1	1	RPA1	LQTDVANSSSNSKR	1363	//15	6//53	1.244	0.653846	R.LEEDNDEEQSHK[1771.91]K.T	4YM7_1_RPA1	1	RPA1	LEEDNDEEQSHKK	1376	126.127	43551.3	127.131	19915.5	47068.1	17431.3	0.370343	2.7002	1.43307
				-141	33.6117	JL033021_040221_RPA2HFH_Q2_1to2_1ug.05543.05543.6	P	2.09375	0.08375	0.341	//16	5//96	1.0235	0.464286	R.LQTDVANSSSNSK[1865.86]R.L	4YM7_1_RPA1	1	RPA1	LQTDVANSSSNSKR	1363	//15	7//93	1.07025	0.461538	R.LEEDNDEEQSHK[1771.91]K.T	4YM7_1_RPA1	1	RPA1	LEEDNDEEQSHKK	1376	126.127	19715.8	127.13	30039.8	21136.8	30420.2	1.43921	0.694828	-0.525272
				-438	77.9733	JL033021_040221_RPA2HFH_Q2_1to10_50B.06229.06229.5	P	1.7445	0.0792252	0.181	//16	6//113	0.427	0.2	R.LEEDNDEEQSHK[1771.91]KTK.Q	4YM7_1_RPA1	1	RPA1	LEEDNDEEQSHKKTK	1376	//16	5//96	1.3175	0.357143	R.LQTDVANSSSNSK[2095.01]R.L	4YM7_1_RPA1	1	RPA1	LQTDVANSSSNSKR	1363	126.127	8399.91	127.13	41686.5	8770.39	43916.4	5.00735	0.199706	-2.32405
				-141	35.8928	JL033021_040221_RPA2HFH_Q2_5to1_1ug.05496.05496.5	P	1.57475	0.0700387	0.498	//16	5//96	0.58475	0.178571	R.LQTDVANSSSNSK[1865.86]R.L	4YM7_1_RPA1	1	RPA1	LQTDVANSSSNSKR	1363	//15	5//93	0.99	0.384615	R.LEEDNDEEQSHK[1771.91]K.T	4YM7_1_RPA1	1	RPA1	LEEDNDEEQSHKK	1376	126.127	21881.9	127.13	5429.99	23686	3854.29	0.162724	6.14537	2.6195
				-141	33.921	JL033021_040221_RPA2HFH_Q2_1to10_50B.05659.05659.4	P	1.52525	0.0908292	9.22e-05	//16	4//76	1.0295	0.321429	R.LQTDVANSSSNSK[1865.86]R.L	4YM7_1_RPA1	1	RPA1	LQTDVANSSSNSKR	1363	//15	4//73	0.49575	0.153846	R.LEEDNDEEQSHK[1771.91]K.T	4YM7_1_RPA1	1	RPA1	LEEDNDEEQSHKK	1376	126.127	4423.15	127.13	22428.1	4614.35	23636.5	5.12238	0.195222	-2.35681
				1209	143.312	JL033021_040221_RPA2HFH_Q2_1to10_50B.05737.05737.3	P	1.3345	0.0590395	0.113	//16	5//56	0.87875	0.357143	R.LQTDVANSSSNSK[1865.86]R.L	4YM7_1_RPA1	1	RPA1	LQTDVANSSSNSKR	1363	//15	4//53	0.45575	0.230769	R.LEEDNDEEQSHK[1771.91]K.T	4YM7_1_RPA1	1	RPA1	LEEDNDEEQSHKK	1376	126.127	11057.2	127.13	71778.3	11407.4	75923.7	6.65565	0.150248	-2.73458
				-141	28.3657	JL033021_040221_RPA2HFH_Q2_10to1_50B.05582.05582.5	P	1.31125	0.0587109	0.393	//16	8//96	0.856	0.428571	R.LQTDVANSSSNSK[1865.86]R.L	4YM7_1_RPA1	1	RPA1	LQTDVANSSSNSKR	1363	//15	4//93	0.45525	0.230769	R.LEEDNDEEQSHK[1771.91]K.T	4YM7_1_RPA1	1	RPA1	LEEDNDEEQSHKK	1376	126.127	29334.9	127.13	4241.65	31778.3	1911.8	0.0601605	16.6222	4.05504
				-141	34.3726	JL033021_040221_RPA2HFH_Q2_1to2_1ug.05522.05522.4	P	1.226	0.0960928	0.62	//16	6//76	1.14525	0.392857	R.LQTDVANSSSNSK[1865.86]R.L	4YM7_1_RPA1	1	RPA1	LQTDVANSSSNSKR	1363	//15	1//73	0.08075	0.0384615	R.LEEDNDEEQSHK[1771.91]K.T	4YM7_1_RPA1	1	RPA1	LEEDNDEEQSHKK	1376	126.127	4365.89	127.13	4813.29	4695.52	4765.9	1.01499	0.985233	-0.0214626
				-141	30.2933	JL033021_040221_RPA2HFH_Q2_1to2_50B.05586.05586.3	P	0.78825	0.0459527	0.62	//16	3//56	0.28675	0.107143	R.LQTDVANSSSNSK[1865.86]R.L	4YM7_1_RPA1	1	RPA1	LQTDVANSSSNSKR	1363	1//15	3//53	0.5015	0.192308	R.LEEDNDEEQSHK[1771.91]K.T	4YM7_1_RPA1	1	RPA1	LEEDNDEEQSHKK	1376	126.127	17491	127.13	18160.6	18820.7	17890.3	0.950566	1.052	0.0731413
	10	RPA1:1363---RPA1:1377	6.25525
				0	1.1158	JL033021_040221_RPA2HFH_Q2_2to1_50B.05738.05738.5	N	6.25525	0.273537		//16	14//89	4.7985	1.46154	R.LQTDVANSSSNSK[2533.29]R.L	4YM7_1_RPA1	1	RPA1	LQTDVANSSSNSKR	1363	//16	10//113	1.45675	0.714286	R.LEEDNDEEQSHK[1913.01]K[425.27]TK.Q	4YM7_1_RPA1	1	RPA1	LEEDNDEEQSHKKTK	1377	126.127	74390	127.131	26194.6	80460.6	21391.5	0.265862	3.76135	1.91125
	11	RPA1:1363---RPA1:267	5.67125
				0	2.03868	JL033021_040221_RPA2HFH_Q2_1to2_50B.08687.08687.5	N	5.67125	0.198417		//6	4//29	1.3315	1.2	R.VK[1913]GFIR.Q	4YM7_1_RPA1	1	RPA1	VKGFIR	267	//16	12//97	4.33975	1.30769	R.LQTDVANSSSNSK[1125.71]R.L	4YM7_1_RPA1	1	RPA1	LQTDVANSSSNSKR	1363	126.127	83508.6	127.13	116594	89614.2	117443	1.31055	0.763041	-0.390168
				0	1.13089	JL033021_040221_RPA2HFH_Q2_2to1_50B.08282.08282.5	N	4.72275	0.16336		2//6	6//29	1.3015	1.6	R.VK[1913.01]GFIR.Q	4YM7_1_RPA1	1	RPA1	VKGFIR	267	//16	13//97	3.42125	1.11538	R.LQTDVANSSSNSK[1125.71]R.L	4YM7_1_RPA1	1	RPA1	LQTDVANSSSNSKR	1363	126.127	214763	127.13	98907.8	232099	86707.9	0.373582	2.67679	1.4205
				-141	43.6526	JL033021_040221_RPA2HFH_Q2_5to1_50B.08976.08976.5	NP	2.21725	0.086735	0.000209	//16	5//103	0.8655	0.464286	R.LQTDVANSSSNSK[984.61]R.L	4YM7_1_RPA1	1	RPA1	LQTDVANSSSNSKR	1363	//6	5//32	1.35175	1.08333	R.VK[1771.91]GFIR.Q	4YM7_1_RPA1	1	RPA1	VKGFIR	267	126.127	101987	127.13	24953.9	110398	17584.5	0.159282	6.27816	2.65034
				-141	45.4612	JL033021_040221_RPA2HFH_Q2_10to1_50B.08882.08882.5	NP	2.186	0.0818037	6.55e-07	//16	5//103	0.869	0.464286	R.LQTDVANSSSNSK[984.61]R.L	4YM7_1_RPA1	1	RPA1	LQTDVANSSSNSKR	1363	//6	5//32	1.317	1.08333	R.VK[1771.91]GFIR.Q	4YM7_1_RPA1	1	RPA1	VKGFIR	267	126.127	88946.5	127.13	14043	96345.6	7063.25	0.0733116	13.6404	3.76981
				-141	43.7818	JL033021_040221_RPA2HFH_Q2_1to5_50B.08865.08865.5	NP	2.01625	0.0745241	0.000384	//16	6//103	0.79675	0.5	R.LQTDVANSSSNSK[984.61]R.L	4YM7_1_RPA1	1	RPA1	LQTDVANSSSNSKR	1363	//6	4//32	1.2195	1	R.VK[1771.91]GFIR.Q	4YM7_1_RPA1	1	RPA1	VKGFIR	267	126.127	45621.5	127.13	150802	48248.5	157501	3.26437	0.306338	-1.70681
				-141	41.2295	JL033021_040221_RPA2HFH_Q2_1to10_50B.08928.08928.4	P	1.68375	0.0672263	0.381	//16	6//84	1.25475	0.5	R.LQTDVANSSSNSK[984.61]R.L	4YM7_1_RPA1	1	RPA1	LQTDVANSSSNSKR	1363	//6	4//26	0.429	0.5	R.VK[1771.91]GFIR.Q	4YM7_1_RPA1	1	RPA1	VKGFIR	267	126.128	17488.7	127.131	115221	18028.8	121899	6.76132	0.1479	-2.7573
				-142	42.3663	JL033021_040221_RPA2HFH_Q2_1to10_50B.08913.08913.4	P	1.4365	0.0551429	0.649	//16	5//84	1.0445	0.357143	R.LQTDVANSSSNSK[984.61]R.L	4YM7_1_RPA1	1	RPA1	LQTDVANSSSNSKR	1363	//6	4//26	0.392	0.5	R.VK[1771.91]GFIR.Q	4YM7_1_RPA1	1	RPA1	VKGFIR	267	126.127	17807.1	127.131	100068	18497.4	105632	5.71066	0.175111	-2.51366
	12	RPA1:1363---RPA1:442	3.2235
				-141	27.3686	JL033021_040221_RPA2HFH_Q2_1to10_50B.21612.21612.5	P	3.2235	0.0978404	0.385	//13	10//193	2.68025	0.4375	R.LM[147.04]NAFVTIQNDVNAFIDSTK[1771.91]AQGR.T	4YM7_1_RPA1	1	RPA1	LMNAFVTIQNDVNAFIDSTKAQGR	442	//16	4//96	0.54325	0.214286	R.LQTDVANSSSNSK[2934.49]R.L	4YM7_1_RPA1	1	RPA1	LQTDVANSSSNSKR	1363	126.127	4280.96	127.13	22977	4455.69	24237.4	5.43966	0.183835	-2.44352
	13	RPA1:1363---RPA1:1495	6.11425
				0	0.689721	JL033021_040221_RPA2HFH_Q2_1to2_50B.07416.07416.5	N	6.11425	0.190232		//6	5//29	1.07975	1.3	R.K[1913.01]SIIR.Q	4YM7_1_RPA1	1	RPA1	KSIIR	1495	//16	13//96	5.0345	1.46154	R.LQTDVANSSSNSK[1022.67]R.L	4YM7_1_RPA1	1	RPA1	LQTDVANSSSNSKR	1363	126.127	293944	127.13	532609	314441	544346	1.73116	0.577649	-0.791735
				0	0.645247	JL033021_040221_RPA2HFH_Q2_2to1_50B.06969.06969.5	N	5.9895	0.179385		1//6	5//29	1.05325	1.3	R.K[1913]SIIR.Q	4YM7_1_RPA1	1	RPA1	KSIIR	1495	1//16	14//96	4.93625	1.5	R.LQTDVANSSSNSK[1022.67]R.L	4YM7_1_RPA1	1	RPA1	LQTDVANSSSNSKR	1363	126.127	637212	127.13	376638	687974	346394	0.503498	1.9861	0.989941
				0	1.64327	JL033021_040221_RPA2HFH_Q2_5to1_50B.07569.07569.5	N	5.8555	0.190655		//6	3//29	1.0655	0.8	R.K[1913.01]SIIR.Q	4YM7_1_RPA1	1	RPA1	KSIIR	1495	//16	12//96	4.79	1.30769	R.LQTDVANSSSNSK[1022.67]R.L	4YM7_1_RPA1	1	RPA1	LQTDVANSSSNSKR	1363	126.127	293643	127.13	79657.1	317799	58998	0.185646	5.3866	2.42938
				-2	5.95308	JL033021_040221_RPA2HFH_Q2_1to5_1ug.07538.07538.5	N	5.7915	0.238535		//6	4//29	1.07575	0.9	R.K[1912.99]SIIR.Q	4YM7_1_RPA1	1	RPA1	KSIIR	1495	//16	14//96	4.71575	1.5	R.LQTDVANSSSNSK[1022.65]R.L	4YM7_1_RPA1	1	RPA1	LQTDVANSSSNSKR	1363	126.127	31104.5	127.13	117061	32779.7	122648	3.74159	0.267266	-1.90365
[truncated: 566 more rows]
