# Supplementary material for: Isobaric crosslinking mass spectrometry technology for studying conformational and structural changes in proteins and complexes
Source: eLife. 2024 Nov 14;13:RP99809. doi: 10.7554/eLife.99809 (PMC11563578; doi:10.7554/eLife.99809)
Supplement: Figure 1—source data 3. — The information includes the peptide sequences and protein names, sites of Qlinker modification, score, search engine (N = Nexus, P = pLink2), reporter ion intensities, and reporter ion ratios. [file elife-99809-fig1-data3.xlsx]

## Sheet: RPA2HFH.inter
index	Protein-protein	Crosslinkingsites	Xcorr	Da	ppm	spectrum	engine	xcorr	Xcorr_norm	expect	immonium1	ion1	dot1	connective1	peptide1	protein1	Unique_protein1	subunit1	realpep1	position1	immonium2	ion2	dot2	connective2	peptide2	protein2	Unique_protein2	subunit2	realpep2	position2	Q2link0mz	Q2link0intensity	Q2link1mz	Q2link1intensity	corrected126	corrected127	127/126ratio	126/127ratio	Log2(126/127)
1	AC19---AC40
	1	AC19:122---AC40:329	5.91375
				-141	38.1727	JL033021_040221_RPA2HFH_Q2_1to2_50B.15006.15006.5	NP	5.91375	0.216035	0.0913	//17	12//113	4.4315	1.1	K.GLK[1843.95]DLM[147.04]DLC[160.03]DVVESK.F	4YM7_11_RPAC19	1	AC19	GLKDLMDLCDVVESK	122	//15	12//93	1.48225	0.769231	K.NKAEYLK[2003]NC[160.03]PITQ.-	4YM7_3_RPAC40	1	AC40	NKAEYLKNCPITQ	329	126.127	42510.7	127.13	64874.2	45573.9	65701.7	1.44165	0.693649	-0.527722
				-143	29.762	JL033021_040221_RPA2HFH_Q2_1to1_50B.15408.15408.4	P	5.84775	0.190434	0.0486	//17	14//87	4.57225	1.33333	K.GLK[1843.95]DLM[147.04]DLC[160.03]DVVESK.F	4YM7_11_RPAC19	1	AC19	GLKDLMDLCDVVESK	122	//15	9//71	1.2755	0.576923	K.NKAEYLK[2003]NC[160.03]PITQ.-	4YM7_3_RPAC40	1	AC40	NKAEYLKNCPITQ	329	126.127	22489.6	127.13	19327.9	24232.1	18692.4	0.771392	1.29636	0.374465
				-141	32.1662	JL033021_040221_RPA2HFH_Q2_5to1_50B.15396.15396.4	NP	5.1395	0.175338	0.00887	1//17	13//87	3.6845	1.06667	K.GLK[1843.95]DLM[147.04]DLC[160.03]DVVESK.F	4YM7_11_RPAC19	1	AC19	GLKDLMDLCDVVESK	122	//15	10//71	1.455	0.692308	K.NKAEYLK[2003]NC[160.03]PITQ.-	4YM7_3_RPAC40	1	AC40	NKAEYLKNCPITQ	329	126.127	40426.9	127.13	9832.7	43761.8	6907.3	0.157838	6.33559	2.66348
				-141	29.9034	JL033021_040221_RPA2HFH_Q2_1to10_50B.15275.15275.4	P	4.87325	0.156149	0.00625	//17	13//87	3.83025	1.06667	K.GLK[1843.95]DLM[147.04]DLC[160.03]DVVESK.F	4YM7_11_RPAC19	1	AC19	GLKDLMDLCDVVESK	122	//15	9//71	1.043	0.5	K.NKAEYLK[2003]NC[160.03]PITQ.-	4YM7_3_RPAC40	1	AC40	NKAEYLKNCPITQ	329	126.126	10846.9	127.13	67848.8	11211.2	71731.7	6.3982	0.156294	-2.67767
				-141	32.7319	JL033021_040221_RPA2HFH_Q2_1to2_50B.15003.15003.4	NP	4.679	0.151778	0.0187	2//17	13//87	2.79225	0.9	K.GLK[1843.95]DLM[147.04]DLC[160.03]DVVESK.F	4YM7_11_RPAC19	1	AC19	GLKDLMDLCDVVESK	122	//15	10//71	1.88675	0.846154	K.NKAEYLK[2003]NC[160.03]PITQ.-	4YM7_3_RPAC40	1	AC40	NKAEYLKNCPITQ	329	126.127	39067.6	127.13	55392.2	41917.1	55850.1	1.33239	0.750529	-0.41402
				-141	30.3277	JL033021_040221_RPA2HFH_Q2_1to5_50B.15208.15208.4	P	4.16225	0.125883	0.317	1//17	16//87	3.242	1.23333	K.GLK[1843.95]DLM[147.04]DLC[160.03]DVVESK.F	4YM7_11_RPAC19	1	AC19	GLKDLMDLCDVVESK	122	//15	9//71	0.92025	0.5	K.NKAEYLK[2003]NC[160.03]PITQ.-	4YM7_3_RPAC40	1	AC40	NKAEYLKNCPITQ	329	126.127	23094.9	127.13	71990	24460.2	75069.8	3.06906	0.325832	-1.6178
				-142	30.0587	JL033021_040221_RPA2HFH_Q2_1to10_50B.15288.15288.5	P	2.7045	0.0907748	0.606	//17	10//113	1.709	0.533333	K.GLK[1843.95]DLM[147.04]DLC[160.03]DVVESK.F	4YM7_11_RPAC19	1	AC19	GLKDLMDLCDVVESK	122	//15	9//93	0.9955	0.5	K.NKAEYLK[2003]NC[160.03]PITQ.-	4YM7_3_RPAC40	1	AC40	NKAEYLKNCPITQ	329	126.127	11392.3	127.13	72255.7	11766.9	76405.2	6.49323	0.154007	-2.69894
2	RPA43---RPA49
	1	RPA43:19---RPA49:153	3.80575
				-142	15.3616	JL033021_040221_RPA2HFH_Q2_1to2_D.16859.16859.5	P	3.80575	0.155932	0.0947	//17	10//138	3.65175	0.666667	R.IDSDK[1522.9]LTDSAIDIVDSVR.T	4YM7_13_RPA49	1	RPA49	IDSDKLTDSAIDIVDSVR	153	//12	2//65	0.154	0.1	R.ETARFIKK[2227.16]HK.K	4YM7_7_RPA43	1	RPA43	ETARFIKKHK	19	126.126	12881.6	127.13	20629.5	13801.9	20949.8	1.51789	0.65881	-0.602066
3	RPA43---RPB5
	1	RPA43:19---RPB5:171	3.07975
				-141	45.7252	JL033021_040221_RPA2HFH_Q2_2to1_50B.08497.08497.4	P	3.07975	0.12563	0.00826	1//8	8//40	3.04825	1.375	R.LK[1065.67]ESQLPR.I	4YM7_5_RPB5	1	RPB5	LKESQLPR	171	//8	1//30	0.0315	0.0833333	R.FIKK[1235.72]HK.K	4YM7_7_RPA43	1	RPA43	FIKKHK	19	126.127	167402	127.13	67838.4	180990	57666.3	0.318616	3.13858	1.65011
4	RPA14---RPA2
	1	RPA14:1---RPA2:930	10.0925
				-141	23.7187	JL033021_040221_RPA2HFH_Q2_5to1_100B.19375.19375.6	P	10.0925	0.331783	0.469	//11	26//279	9.933	1.16667	K.GVC[160.03]SRK[990.5]WPTIDMPFSETGIQPDIIINPHAFPSR.M	4YM7_2_RPA2	1	RPA2	GVCSRKWPTIDMPFSETGIQPDIIINPHAFPSR	930	//7	2//34	0.1595	0.333333	-.M[4034.98]M[147.04]KGSR.R	4YM7_4_RPA14	1	RPA14	MMKGSR	1	126.126	43396	127.13	10654.7	46974.9	7521.63	0.16012	6.24531	2.64277
5	RPA14---RPA49
	1	RPA14:1---RPA49:103	0.289
				-141	63.3748	JL033021_040221_RPA2HFH_Q2_2to1_D.15431.15431.3	P	0.289	0.0118457	0.202	//9	2//28	0.1725	0.285714	K.VVSK[990.5]SSK.N	4YM7_13_RPA49	1	RPA49	VVSKSSK	103	//7	2//25	0.1165	0.333333	-.M[1002.54]M[147.04]KGSR.R	4YM7_4_RPA14	1	RPA14	MMKGSR	1	126.127	29100	127.13	11221.7	31466.8	9412.54	0.299126	3.34307	1.74117
6	AC40---RPA43
	1	AC40:154---RPA43:72	2.48175
				-141	32.8602	JL033021_040221_RPA2HFH_Q2_10to1_100B.11087.11087.5	P	2.48175	0.104698	0.609	1//16	10//131	2.27625	0.588235	K.GSTDPK[1846.98]ELYNNAHVYAR.D	4YM7_3_RPAC40	1	AC40	GSTDPKELYNNAHVYAR	154	//16	3//101	0.2055	0.307692	K.Q[111.03]HLNPLVMK[2200.09]YNNK.V	4YM7_7_RPA43	1	RPA43	QHLNPLVMKYNNK	72	126.127	47625	127.13	8789.77	51576.3	5143.53	0.0997265	10.0274	3.32588
7	AC40---RPB10
	1	AC40:288---RPB10:2	0.59725
				-439	93.5624	JL033021_040221_RPA2HFH_Q2_10to1_D.19271.19271.4	P	0.59725	0.0193699	0.536	//14	//65	0	0	R.YEEFADK[1587.83]VKLGR.V	4YM7_3_RPAC40	1	AC40	YEEFADKVKLGR	288	//12	4//63	0.59725	0.181818	M.I[1704.91]VPVRC[160.03]FSC[160.03]GK.V	4YM7_10_RPB10	1	RPB10	IVPVRCFSCGK	2	126.127	2670.74			2896.34	-239.76	-0.0827804	-12.0802	#NUM!
	2	AC40:148---RPB10:68	3.72775
				-141	42.4037	JL033021_040221_RPA2HFH_Q2_1to5_50B.08280.08280.3	P	3.72775	0.144526	0.011	//14	11//49	3.07725	1.25	R.NPDAPK[1299.68]GSTDPK.E	4YM7_3_RPAC40	1	AC40	NPDAPKGSTDPK	148	//10	5//30	0.6505	0.8125	R.YNPLEK[1491.76]RD.-	4YM7_10_RPB10	1	RPB10	YNPLEKRD	68	126.128	72947.8	127.131	269881	76914.6	282650	3.67486	0.272119	-1.87769
				-141	43.2383	JL033021_040221_RPA2HFH_Q2_1to5_50B.08279.08279.4	P	2.516	0.0787801	0.179	//14	10//66	2.24725	0.958333	R.NPDAPK[1299.68]GSTDPK.E	4YM7_3_RPAC40	1	AC40	NPDAPKGSTDPK	148	//10	4//39	0.26875	0.5625	R.YNPLEK[1491.76]RD.-	4YM7_10_RPB10	1	RPB10	YNPLEKRD	68	126.127	150656	127.131	536734	159016	561630	3.5319	0.283134	-1.82045
				-141	44.5623	JL033021_040221_RPA2HFH_Q2_10to1_1ug.08284.08284.4	P	2.37375	0.0844525	0.379	//14	11//66	2.10125	1	R.NPDAPK[1299.68]GSTDPK.E	4YM7_3_RPAC40	1	AC40	NPDAPKGSTDPK	148	//10	3//39	0.2725	0.5	R.YNPLEK[1491.76]RD.-	4YM7_10_RPB10	1	RPB10	YNPLEKRD	68	126.127	257238	127.13	44815.3	278602	24930.3	0.0894836	11.1752	3.48223
				-141	41.7162	JL033021_040221_RPA2HFH_Q2_10to1_50B.08302.08302.3	P	0.75675	0.0402366	0.598	//14	4//49	0.728	0.333333	R.NPDAPK[1299.68]GSTDPK.E	4YM7_3_RPAC40	1	AC40	NPDAPKGSTDPK	148	//10	2//30	0.02875	0.125	R.YNPLEK[1491.76]RD.-	4YM7_10_RPB10	1	RPB10	YNPLEKRD	68	126.127	75497.3	127.131	12210	81775.2	6306.41	0.0771189	12.967	3.69677
8	AC40---RPB5
	1	AC40:148---RPB5:201	2.00075
				-141	45.5671	JL033021_040221_RPA2HFH_Q2_1to10_50B.04188.04188.4	P	2.00075	0.0965357	0.248	//14	7//72	1.32925	0.583333	R.NPDAPK[1029.55]GSTDPK.E	4YM7_3_RPAC40	1	AC40	NPDAPKGSTDPK	148	1//8	5//38	0.6715	0.5	R.K[1491.76]SETSGR.Y	4YM7_5_RPB5	1	RPB5	KSETSGR	201	126.127	5075.05	127.131	29463.5	5264.09	31116.9	5.91117	0.169171	-2.56344
9	AC40---RPA1
	1	AC40:240---RPA1:848	7.42875
				-1	2.61855	JL033021_040221_RPA2HFH_Q2_1to10_1ug.17560.17560.5	N	7.42875	0.290344		//19	15//124	4.09975	1.0625	R.LLPQINILQPIK[1711.96]GESAR.R	4YM7_3_RPAC40	1	AC40	LLPQINILQPIKGESAR	240	//14	9//69	3.329	1	R.TDILK[2296.38]TSVDTGR.E	4YM7_1_RPA1	1	RPA1	TDILKTSVDTGR	848	126.127	7865.44	127.13	62689.5	8019.95	66470.8	8.28819	0.120654	-3.05106
				0	0.479069	JL033021_040221_RPA2HFH_Q2_1to5_1ug.17475.17475.5	N	7.09575	0.26173		//19	12//124	3.669	0.8125	R.LLPQINILQPIK[1711.96]GESAR.R	4YM7_3_RPAC40	1	AC40	LLPQINILQPIKGESAR	240	//14	9//69	3.42675	1	R.TDILK[2296.37]TSVDTGR.E	4YM7_1_RPA1	1	RPA1	TDILKTSVDTGR	848	126.127	13995	127.13	53049.6	14745.6	55590.6	3.76998	0.265254	-1.91456
				0	3.4667	JL033021_040221_RPA2HFH_Q2_5to1_50B.17369.17369.5	N	6.63375	0.26434		//19	14//124	3.44875	0.875	R.LLPQINILQPIK[1711.97]GESAR.R	4YM7_3_RPAC40	1	AC40	LLPQINILQPIKGESAR	240	//14	9//69	3.185	1	R.TDILK[2296.38]TSVDTGR.E	4YM7_1_RPA1	1	RPA1	TDILKTSVDTGR	848	126.127	41199.5	127.13	11925.2	44582.6	9080.24	0.203672	4.90985	2.29568
				0	0.391197	JL033021_040221_RPA2HFH_Q2_5to1_1ug.17447.17447.5	N	6.443	0.24808		//19	13//124	3.1135	0.84375	R.LLPQINILQPIK[1711.96]GESAR.R	4YM7_3_RPAC40	1	AC40	LLPQINILQPIKGESAR	240	1//14	9//69	3.3295	1	R.TDILK[2296.37]TSVDTGR.E	4YM7_1_RPA1	1	RPA1	TDILKTSVDTGR	848	126.127	58413.7	127.13	16769.1	63211.5	12725.4	0.201315	4.96733	2.31247
				0	1.53353	JL033021_040221_RPA2HFH_Q2_1to5_1ug.17467.17467.5	N	5.92075	0.2256		//19	12//124	2.428	0.59375	R.LLPQINILQPIK[1711.96]GESAR.R	4YM7_3_RPAC40	1	AC40	LLPQINILQPIKGESAR	240	//14	9//69	3.49275	1.13636	R.TDILK[2296.38]TSVDTGR.E	4YM7_1_RPA1	1	RPA1	TDILKTSVDTGR	848	126.127	13736.6	127.13	52689	14468.4	55227.3	3.81711	0.261978	-1.93248
				-1	2.91577	JL033021_040221_RPA2HFH_Q2_1to5_1ug.17452.17452.5	N	5.431	0.210113		//19	11//124	2.21825	0.5625	R.LLPQINILQPIK[1711.94]GESAR.R	4YM7_3_RPAC40	1	AC40	LLPQINILQPIKGESAR	240	//14	9//69	3.21275	1	R.TDILK[2296.36]TSVDTGR.E	4YM7_1_RPA1	1	RPA1	TDILKTSVDTGR	848	126.127	12345.5	127.13	48390.1	12994.8	50745.6	3.90508	0.256076	-1.96535
				-1	1.59807	JL033021_040221_RPA2HFH_Q2_2to1_1ug.17518.17518.5	N	5.37375	0.182415		//19	12//124	2.436	0.59375	R.LLPQINILQPIK[1711.95]GESAR.R	4YM7_3_RPAC40	1	AC40	LLPQINILQPIKGESAR	240	//14	8//69	2.93775	0.954545	R.TDILK[2296.37]TSVDTGR.E	4YM7_1_RPA1	1	RPA1	TDILKTSVDTGR	848	126.127	48910.9	127.13	21257.3	52869.4	18388.1	0.347802	2.8752	1.52366
				0	1.53353	JL033021_040221_RPA2HFH_Q2_1to10_1ug.17595.17595.5	N	5.217	0.192901		//19	11//124	2.40325	0.5625	R.LLPQINILQPIK[1711.96]GESAR.R	4YM7_3_RPAC40	1	AC40	LLPQINILQPIKGESAR	240	//14	8//69	2.81375	0.954545	R.TDILK[2296.38]TSVDTGR.E	4YM7_1_RPA1	1	RPA1	TDILKTSVDTGR	848	126.127	9277.32	127.13	57391.1	9594.17	60666.4	6.32326	0.158146	-2.66067
				-141	29.5354	JL033021_040221_RPA2HFH_Q2_2to1_50B.16972.16972.5	NP	4.7705	0.161997	0.044	//18	8//130	0.81425	0.382353	R.LLPQINILQPIK[1570.86]GESAR.R	4YM7_3_RPAC40	1	AC40	LLPQINILQPIKGESAR	240	1//14	14//79	3.95625	1.54167	R.TDILK[2155.27]TSVDTGR.E	4YM7_1_RPA1	1	RPA1	TDILKTSVDTGR	848	126.127	124772	127.131	62470.6	134803	55741.3	0.413502	2.41837	1.27403
				-141	32.1	JL033021_040221_RPA2HFH_Q2_1to2_50B.16981.16981.5	NP	4.65125	0.162344	0.0516	//18	7//130	0.5245	0.264706	R.LLPQINILQPIK[1570.86]GESAR.R	4YM7_3_RPAC40	1	AC40	LLPQINILQPIKGESAR	240	1//14	14//79	4.12675	1.625	R.TDILK[2155.27]TSVDTGR.E	4YM7_1_RPA1	1	RPA1	TDILKTSVDTGR	848	126.127	51549.7	127.13	86176.3	55203.2	87717.1	1.58899	0.629332	-0.668107
				-141	33.6571	JL033021_040221_RPA2HFH_Q2_1to10_50B.17298.17298.5	NP	4.62525	0.162606	0.0228	//18	9//130	0.789	0.411765	R.LLPQINILQPIK[1570.86]GESAR.R	4YM7_3_RPAC40	1	AC40	LLPQINILQPIKGESAR	240	2//14	14//79	3.83625	1.375	R.TDILK[2155.27]TSVDTGR.E	4YM7_1_RPA1	1	RPA1	TDILKTSVDTGR	848	126.127	13702.7	127.13	95497.4	14083.4	101103	7.17888	0.139297	-2.84376
				-141	26.5129	JL033021_040221_RPA2HFH_Q2_1to1_1ug.17398.17398.5	NP	4.12625	0.160673	0.0359	//18	8//130	0.85175	0.382353	R.LLPQINILQPIK[1570.86]GESAR.R	4YM7_3_RPAC40	1	AC40	LLPQINILQPIKGESAR	240	//14	8//79	3.2745	0.875	R.TDILK[2155.27]TSVDTGR.E	4YM7_1_RPA1	1	RPA1	TDILKTSVDTGR	848	126.127	38481.8	127.13	37563.1	41426.8	36797.3	0.888248	1.12581	0.170966
				-142	33.1259	JL033021_040221_RPA2HFH_Q2_1to2_1ug.17488.17488.5	NP	4.12475	0.155267	0.0995	//18	9//130	0.8585	0.411765	R.LLPQINILQPIK[1570.86]GESAR.R	4YM7_3_RPAC40	1	AC40	LLPQINILQPIKGESAR	240	//14	9//79	3.26625	1.04167	R.TDILK[2155.27]TSVDTGR.E	4YM7_1_RPA1	1	RPA1	TDILKTSVDTGR	848	126.127	26050	127.13	39685.2	27927.6	40187.3	1.43898	0.694936	-0.525048
				-142	29.6453	JL033021_040221_RPA2HFH_Q2_1to2_1ug.17500.17500.5	NP	3.9785	0.151848	0.129	//18	8//130	0.5185	0.235294	R.LLPQINILQPIK[1570.86]GESAR.R	4YM7_3_RPAC40	1	AC40	LLPQINILQPIKGESAR	240	//14	9//79	3.46	1.16667	R.TDILK[2155.27]TSVDTGR.E	4YM7_1_RPA1	1	RPA1	TDILKTSVDTGR	848	126.127	27838.1	127.13	43292.5	29837.4	43892.4	1.47105	0.679786	-0.556847
				-141	31.0925	JL033021_040221_RPA2HFH_Q2_1to5_50B.17210.17210.5	NP	3.823	0.134537	0.174	//18	6//130	0.5015	0.176471	R.LLPQINILQPIK[1570.86]GESAR.R	4YM7_3_RPAC40	1	AC40	LLPQINILQPIKGESAR	240	//14	9//79	3.3215	0.916667	R.TDILK[2155.27]TSVDTGR.E	4YM7_1_RPA1	1	RPA1	TDILKTSVDTGR	848	126.127	19540.3	127.13	70867.7	20614.5	74186.3	3.59875	0.277874	-1.8475
				-141	31.0925	JL033021_040221_RPA2HFH_Q2_10to1_1ug.17516.17516.5	NP	3.755	0.136767	0.609	//18	6//130	0.3925	0.176471	R.LLPQINILQPIK[1570.86]GESAR.R	4YM7_3_RPAC40	1	AC40	LLPQINILQPIKGESAR	240	//14	9//79	3.3625	1.04167	R.TDILK[2155.27]TSVDTGR.E	4YM7_1_RPA1	1	RPA1	TDILKTSVDTGR	848	126.127	76892.6	127.13	15359.8	83262.7	9556.44	0.114775	8.71274	3.12313
	2	AC40:290---RPA1:848	4.71
				0	0.296332	JL033021_040221_RPA2HFH_Q2_2to1_50B.09812.09812.5	N	4.71	0.225063		//14	9//79	3.579	1.27273	R.TDILK[978.64]TSVDTGR.E	4YM7_1_RPA1	1	RPA1	TDILKTSVDTGR	848	//5	3//27	1.131	1	K.VK[1711.96]LGR.V	4YM7_3_RPAC40	1	AC40	VKLGR	290	126.127	217161	127.13	106093	234641	94192.1	0.40143	2.4911	1.31678
	3	AC40:168---RPA1:848	4.9755
				-141	34.646	JL033021_040221_RPA2HFH_Q2_10to1_50B.10562.10562.5	P	4.9755	0.233976	0.643	//14	13//82	4.7385	1.54167	R.TDILK[1354.72]TSVDTGR.E	4YM7_1_RPA1	1	RPA1	TDILKTSVDTGR	848	//11	5//54	0.237	0.388889	R.DLK[1570.86]FEPQGR.Q	4YM7_3_RPAC40	1	AC40	DLKFEPQGR	168	126.127	93866.5	127.13	18542.3	101645	11442.9	0.112578	8.88276	3.15101
	4	AC40:272---RPA1:469	0.40125
				-438	165.232	JL033021_040221_RPA2HFH_Q2_2to1_D.15930.15930.3	P	0.40125	0.0149258	0.401	1//8	2//31	0.08725	0.142857	R.K[970.54]HM[147.04]MGKR.V	4YM7_1_RPA1	1	RPA1	KHMMGKR	469	//7	3//25	0.314	0.416667	R.K[1168.62]DTVSR.E	4YM7_3_RPAC40	1	AC40	KDTVSR	272	126.127	48938.2	127.13	22292.6	52890.7	19495	0.36859	2.71304	1.43991
	5	AC40:148---RPA1:1363	2.88525
				-141	38.4513	JL033021_040221_RPA2HFH_Q2_1to5_50B.06097.06097.5	P	2.88525	0.086548	0.306	//16	10//100	1.41075	0.607143	R.LQTDVANSSSNSK[1491.76]R.L	4YM7_1_RPA1	1	RPA1	LQTDVANSSSNSKR	1363	//14	11//79	1.4745	0.958333	R.NPDAPK[1771.91]GSTDPK.E	4YM7_3_RPAC40	1	AC40	NPDAPKGSTDPK	148	126.127	27927.7	127.13	91317.1	29544	95346.5	3.22727	0.309859	-1.69031
				-141	32.7979	JL033021_040221_RPA2HFH_Q2_1to10_50B.06170.06170.4	P	2.5645	0.0934244	0.112	//16	8//80	1.8785	0.642857	R.LQTDVANSSSNSK[1491.76]R.L	4YM7_1_RPA1	1	RPA1	LQTDVANSSSNSKR	1363	//14	7//62	0.686	0.458333	R.NPDAPK[1771.91]GSTDPK.E	4YM7_3_RPAC40	1	AC40	NPDAPKGSTDPK	148	126.127	5192.52	127.131	29638.9	5390.06	31294.3	5.80592	0.172238	-2.53753
10	AC40---RPA2
	1	AC40:38---RPA2:106	3.58175
				-146	20.5723	JL033021_040221_RPA2HFH_Q2_1to10_50B.12665.12665.5	P	3.58175	0.107714	0.44	//9	13//199	2.1135	0.615385	K.LSVSVEQVSIAK[1758.92]PM[147.04]SNDGVSSAVERK.V	4YM7_2_RPA2	1	RPA2	LSVSVEQVSIAKPMSNDGVSSAVERK	106	//14	6//96	1.46825	0.423077	K.K[2998.56]DFEVNISSLDAR.E	4YM7_3_RPAC40	1	AC40	KDFEVNISSLDAR	38	126.127	16699.2	127.13	104369	17260.9	110341	6.39253	0.156433	-2.67639
	2	AC40:38---RPA2:77	6.19725
				-141	28.2862	JL033021_040221_RPA2HFH_Q2_1to2_1ug.14797.14797.6	P	6.19725	0.192148	0.386	//12	14//183	5.08625	0.869565	K.VIFDGK[1758.92]PLNSEDEISNSGYLGNK.L	4YM7_2_RPA2	1	RPA2	VIFDGKPLNSEDEISNSGYLGNK	77	//14	10//96	1.111	0.846154	K.K[2761.38]DFEVNISSLDAR.E	4YM7_3_RPAC40	1	AC40	KDFEVNISSLDAR	38	126.126	30400.5	127.13	50803.9	32555.2	51711.4	1.58842	0.629556	-0.667593
				-2	8.51942	JL033021_040221_RPA2HFH_Q2_2to1_1ug.14826.14826.6	N	5.498	0.176458		1//16	16//134	4.5155	0.795455	K.VIFDGK[1900.05]PLNSEDEISNSGYLGNK.L	4YM7_2_RPA2	1	RPA2	VIFDGKPLNSEDEISNSGYLGNK	77	//14	7//71	0.9825	0.653846	K.K[2902.52]DFEVNISSLDAR.E	4YM7_3_RPAC40	1	AC40	KDFEVNISSLDAR	38	126.127	77226	127.13	42534.9	83403.3	38646.9	0.463374	2.15809	1.10975
				0	8.18639	JL033021_040221_RPA2HFH_Q2_1to1_1ug.14678.14678.6	N	5.22625	0.164092		1//16	14//134	4.17075	0.704545	K.VIFDGK[1900.05]PLNSEDEISNSGYLGNK.L	4YM7_2_RPA2	1	RPA2	VIFDGKPLNSEDEISNSGYLGNK	77	//14	7//71	1.0555	0.769231	K.K[2902.51]DFEVNISSLDAR.E	4YM7_3_RPAC40	1	AC40	KDFEVNISSLDAR	38	126.127	48254.6	127.13	52557.5	51903.2	51987.7	1.00163	0.998375	-0.0023468
				-1	8.99644	JL033021_040221_RPA2HFH_Q2_1to5_50B.14296.14296.6	N	5.19175	0.154818		1//16	16//134	2.9605	0.772727	K.VIFDGK[1900.05]PLNSEDEISNSGYLGNK.L	4YM7_2_RPA2	1	RPA2	VIFDGKPLNSEDEISNSGYLGNK	77	//14	10//71	2.23125	1.11538	K.K[2902.52]DFEVNISSLDAR.E	4YM7_3_RPAC40	1	AC40	KDFEVNISSLDAR	38	126.127	30061.5	127.13	120633	31619.6	126569	4.00287	0.249821	-2.00103
				-2	10.1492	JL033021_040221_RPA2HFH_Q2_5to1_1ug.14726.14726.6	N	5.05725	0.153229		2//16	16//134	3.96675	0.795455	K.VIFDGK[1900.06]PLNSEDEISNSGYLGNK.L	4YM7_2_RPA2	1	RPA2	VIFDGKPLNSEDEISNSGYLGNK	77	//14	6//71	1.0905	0.615385	K.K[2902.52]DFEVNISSLDAR.E	4YM7_3_RPAC40	1	AC40	KDFEVNISSLDAR	38	126.126	63455.2	127.13	16810.5	68678.5	12317.3	0.179348	5.57576	2.47917
				-2	7.49007	JL033021_040221_RPA2HFH_Q2_2to1_1ug.14804.14804.6	N	4.96125	0.150759		1//16	13//134	3.86875	0.818182	K.VIFDGK[1900.05]PLNSEDEISNSGYLGNK.L	4YM7_2_RPA2	1	RPA2	VIFDGKPLNSEDEISNSGYLGNK	77	//14	7//71	1.0925	0.615385	K.K[2902.51]DFEVNISSLDAR.E	4YM7_3_RPAC40	1	AC40	KDFEVNISSLDAR	38	126.126	60202.6	127.13	32786	65021.2	29728.4	0.45721	2.18718	1.12907
				-2	9.72033	JL033021_040221_RPA2HFH_Q2_5to1_50B.14700.14700.6	N	4.89725	0.160484		1//16	13//134	3.7315	0.681818	K.VIFDGK[1900.05]PLNSEDEISNSGYLGNK.L	4YM7_2_RPA2	1	RPA2	VIFDGKPLNSEDEISNSGYLGNK	77	//14	7//71	1.16575	0.653846	K.K[2902.52]DFEVNISSLDAR.E	4YM7_3_RPAC40	1	AC40	KDFEVNISSLDAR	38	126.127	64571.8	127.13	19122.5	69870.6	14694.5	0.21031	4.75488	2.24941
	3	AC40:148---RPA2:77	5.7235
				-141	28.9581	JL033021_040221_RPA2HFH_Q2_1to10_50B.12979.12979.5	P	5.7235	0.203698	0.564	//12	20//183	5.17325	1.04348	K.VIFDGK[1491.76]PLNSEDEISNSGYLGNK.L	4YM7_2_RPA2	1	RPA2	VIFDGKPLNSEDEISNSGYLGNK	77	//14	5//79	0.55025	0.291667	R.NPDAPK[2761.38]GSTDPK.E	4YM7_3_RPAC40	1	AC40	NPDAPKGSTDPK	148	126.127	12707.4	127.13	82761.4	13107.6	87544.9	6.67892	0.149725	-2.73961
	4	AC40:148---RPA2:30	11.0457
				0	0.273078	JL033021_040221_RPA2HFH_Q2_2to1_100B.10986.10986.5	N	11.0457	0.405289		//14	27//182	9.00725	1.75	R.NPDAPK[1364.79]GSTDPKELYNNAHVYAR.D	4YM7_3_RPAC40	1	AC40	NPDAPKGSTDPKELYNNAHVYAR	148	//10	8//40	2.0385	1.42857	R.FINPPK[2963.5]DK.S	4YM7_2_RPA2	1	RPA2	FINPPKDK	30	126.127	85407.5	127.131	39815	92297.9	34997.8	0.379182	2.63725	1.39904
				-141	30.8322	JL033021_040221_RPA2HFH_Q2_5to1_100B.11047.11047.6	P	10.2045	0.386505	0.157	//12	29//190	9.855	1.78261	R.NPDAPK[1223.69]GSTDPKELYNNAHVYAR.D	4YM7_3_RPAC40	1	AC40	NPDAPKGSTDPKELYNNAHVYAR	148	//10	4//44	0.3495	0.5	R.FINPPK[2822.4]DK.S	4YM7_2_RPA2	1	RPA2	FINPPKDK	30	126.127	111669	127.13	29701.7	120860	21803	0.180399	5.54327	2.47074
				0	3.81326	JL033021_040221_RPA2HFH_Q2_1to2_100B.10914.10914.5	N	9.666	0.40058		//14	27//182	7.8265	1.70455	R.NPDAPK[1364.8]GSTDPKELYNNAHVYAR.D	4YM7_3_RPAC40	1	AC40	NPDAPKGSTDPKELYNNAHVYAR	148	//10	8//40	1.8395	1.42857	R.FINPPK[2963.51]DK.S	4YM7_2_RPA2	1	RPA2	FINPPKDK	30	126.126	31251.5	127.13	53265.9	33458	54273.2	1.62213	0.616474	-0.697889
				-143	31.1294	JL033021_040221_RPA2HFH_Q2_5to1_100B.11034.11034.7	P	9.42225	0.385707	0.482	//12	23//190	8.996	1.58696	R.NPDAPK[1223.69]GSTDPKELYNNAHVYAR.D	4YM7_3_RPAC40	1	AC40	NPDAPKGSTDPKELYNNAHVYAR	148	//10	3//44	0.42625	0.3125	R.FINPPK[2822.4]DK.S	4YM7_2_RPA2	1	RPA2	FINPPKDK	30	126.127	69719	127.13	17910.1	75462.5	12933.3	0.171387	5.83476	2.54467
				-141	30.7022	JL033021_040221_RPA2HFH_Q2_1to2_100B.10931.10931.5	P	8.903	0.350401	0.31	1//12	30//190	8.58425	1.80435	R.NPDAPK[1223.69]GSTDPKELYNNAHVYAR.D	4YM7_3_RPAC40	1	AC40	NPDAPKGSTDPKELYNNAHVYAR	148	//10	3//44	0.31875	0.3125	R.FINPPK[2822.4]DK.S	4YM7_2_RPA2	1	RPA2	FINPPKDK	30	126.127	36755	127.13	59453.1	39376.1	60409.3	1.53416	0.651823	-0.617449
				-141	27.1923	JL033021_040221_RPA2HFH_Q2_5to1_100B.11048.11048.5	NP	8.871	0.348224	0.137	//12	28//190	8.51225	1.69565	R.NPDAPK[1223.69]GSTDPKELYNNAHVYAR.D	4YM7_3_RPAC40	1	AC40	NPDAPKGSTDPKELYNNAHVYAR	148	//10	3//44	0.35875	0.3125	R.FINPPK[2822.4]DK.S	4YM7_2_RPA2	1	RPA2	FINPPKDK	30	126.127	81505.9	127.131	20259.5	88225.9	14392.7	0.163135	6.12988	2.61586
				0	3.65235	JL033021_040221_RPA2HFH_Q2_1to5_50B.10743.10743.5	N	8.74	0.258902		//14	30//182	7.713	1.75	R.NPDAPK[1364.8]GSTDPKELYNNAHVYAR.D	4YM7_3_RPAC40	1	AC40	NPDAPKGSTDPKELYNNAHVYAR	148	//10	6//40	1.027	0.857143	R.FINPPK[2963.51]DK.S	4YM7_2_RPA2	1	RPA2	FINPPKDK	30	126.127	42674.7	127.13	163080	44953	170922	3.80225	0.263002	-1.92685
				-440	79.0138	JL033021_040221_RPA2HFH_Q2_1to10_50B.11888.11888.7	P	7.7845	0.277221	0.38	//12	21//190	7.31075	1.30435	R.NPDAPK[1223.69]GSTDPKELYNNAHVYAR.D	4YM7_3_RPAC40	1	AC40	NPDAPKGSTDPKELYNNAHVYAR	148	//10	6//44	0.47375	0.625	R.FINPPK[2822.4]DK.S	4YM7_2_RPA2	1	RPA2	FINPPKDK	30	126.127	26110	127.13	176643	26878.8	186944	6.95507	0.14378	-2.79806
				-142	25.4505	JL033021_040221_RPA2HFH_Q2_1to1_100B.11064.11064.6	P	7.676	0.268129	0.00966	//12	25//190	7.36175	1.36957	R.NPDAPK[1223.69]GSTDPKELYNNAHVYAR.D	4YM7_3_RPAC40	1	AC40	NPDAPKGSTDPKELYNNAHVYAR	148	//10	4//44	0.31425	0.375	R.FINPPK[2822.4]DK.S	4YM7_2_RPA2	1	RPA2	FINPPKDK	30	126.127	52900.5	127.13	53888.9	56930.6	52997.4	0.930911	1.07422	0.103285
				0	1.51786	JL033021_040221_RPA2HFH_Q2_1to1_1ug.07503.07503.4	N	7.299	0.223779		//14	15//58	4.84	2.04545	R.NPDAPK[1364.79]GSTDPK.E	4YM7_3_RPAC40	1	AC40	NPDAPKGSTDPK	148	//10	10//34	2.459	1.57143	R.FINPPK[1632.85]DK.S	4YM7_2_RPA2	1	RPA2	FINPPKDK	30	126.127	78770.2	127.13	64432.7	84899.9	61973.5	0.72996	1.36994	0.454111
				-1	7.17908	JL033021_040221_RPA2HFH_Q2_1to2_100B.10903.10903.5	N	7.22075	0.289032		//14	20//182	6.123	1.29545	R.NPDAPK[1364.76]GSTDPKELYNNAHVYAR.D	4YM7_3_RPAC40	1	AC40	NPDAPKGSTDPKELYNNAHVYAR	148	1//10	7//40	1.09775	0.928571	R.FINPPK[2963.47]DK.S	4YM7_2_RPA2	1	RPA2	FINPPKDK	30	126.127	32224	127.131	51689.2	34525.6	52496.4	1.52051	0.657675	-0.604553
				0	3.49143	JL033021_040221_RPA2HFH_Q2_1to10_100B.10971.10971.5	N	7.15425	0.28213		//14	22//182	5.43275	1.38636	R.NPDAPK[1364.8]GSTDPKELYNNAHVYAR.D	4YM7_3_RPAC40	1	AC40	NPDAPKGSTDPKELYNNAHVYAR	148	//10	5//40	1.7215	0.857143	R.FINPPK[2963.51]DK.S	4YM7_2_RPA2	1	RPA2	FINPPKDK	30	126.127	7544.01	127.13	54460	7738.29	57681	7.45398	0.134157	-2.89801
				0	0.167728	JL033021_040221_RPA2HFH_Q2_2to1_50B.06872.06872.4	N	6.92375	0.19394		//14	15//58	4.47475	1.86364	R.NPDAPK[1364.79]GSTDPK.E	4YM7_3_RPAC40	1	AC40	NPDAPKGSTDPK	148	//10	11//34	2.449	1.78571	R.FINPPK[1632.86]DK.S	4YM7_2_RPA2	1	RPA2	FINPPKDK	30	126.128	464546	127.131	193359	502214	165497	0.329534	3.03459	1.6015
				0	0.86179	JL033021_040221_RPA2HFH_Q2_1to5_50B.07307.07307.4	N	6.77425	0.212509		//14	14//58	4.1185	1.86364	R.NPDAPK[1364.79]GSTDPK.E	4YM7_3_RPAC40	1	AC40	NPDAPKGSTDPK	148	//10	10//34	2.65575	1.57143	R.FINPPK[1632.86]DK.S	4YM7_2_RPA2	1	RPA2	FINPPKDK	30	126.127	35904.1	127.13	109622	38045.3	114246	3.00289	0.333012	-1.58635
				0	0.663487	JL033021_040221_RPA2HFH_Q2_1to2_50B.07390.07390.4	N	6.5935	0.189077		//14	13//58	3.733	1.54545	R.NPDAPK[1364.79]GSTDPK.E	4YM7_3_RPAC40	1	AC40	NPDAPKGSTDPK	148	//10	13//34	2.8605	2.35714	R.FINPPK[1632.86]DK.S	4YM7_2_RPA2	1	RPA2	FINPPKDK	30	126.128	252276	127.131	344466	270784	346476	1.27953	0.781536	-0.355616
				-440	79.7158	JL033021_040221_RPA2HFH_Q2_5to1_100B.12342.12342.7	P	6.2495	0.24114	0.0571	//12	21//190	6.038	1.30435	R.NPDAPK[1223.69]GSTDPKELYNNAHVYAR.D	4YM7_3_RPAC40	1	AC40	NPDAPKGSTDPKELYNNAHVYAR	148	//10	3//44	0.2115	0.3125	R.FINPPK[2822.4]DK.S	4YM7_2_RPA2	1	RPA2	FINPPKDK	30	126.127	123271	127.13	31743.5	133426	22949.4	0.172001	5.81391	2.53951
				0	2.34906	JL033021_040221_RPA2HFH_Q2_1to2_1ug.07545.07545.4	N	6.128	0.188415		//14	14//58	3.82275	1.68182	R.NPDAPK[1364.8]GSTDPK.E	4YM7_3_RPAC40	1	AC40	NPDAPKGSTDPK	148	//10	10//34	2.30525	1.57143	R.FINPPK[1632.86]DK.S	4YM7_2_RPA2	1	RPA2	FINPPKDK	30	126.127	36304.7	127.13	57329.5	38905	58174	1.49528	0.668769	-0.580419
				0	0.465183	JL033021_040221_RPA2HFH_Q2_5to1_1ug.07516.07516.4	N	5.8225	0.179275		//14	13//58	3.59275	1.54545	R.NPDAPK[1364.79]GSTDPK.E	4YM7_3_RPAC40	1	AC40	NPDAPKGSTDPK	148	//10	10//34	2.22975	1.57143	R.FINPPK[1632.86]DK.S	4YM7_2_RPA2	1	RPA2	FINPPKDK	30	126.127	79565.4	127.131	15169.3	86162.9	9112.31	0.105757	9.45565	3.24118
				-1	4.80617	JL033021_040221_RPA2HFH_Q2_5to1_100B.11010.11010.5	N	5.6265	0.227678		//14	19//182	4.72225	1.13636	R.NPDAPK[1364.81]GSTDPKELYNNAHVYAR.D	4YM7_3_RPAC40	1	AC40	NPDAPKGSTDPKELYNNAHVYAR	148	//10	5//40	0.90425	0.642857	R.FINPPK[2963.52]DK.S	4YM7_2_RPA2	1	RPA2	FINPPKDK	30	126.127	66881.6	127.13	17467.5	72388.9	12713.7	0.175631	5.69377	2.50938
				0	0.960942	JL033021_040221_RPA2HFH_Q2_1to10_50B.07422.07422.4	N	5.37725	0.173189		//14	13//58	3.28225	1.5	R.NPDAPK[1364.79]GSTDPK.E	4YM7_3_RPAC40	1	AC40	NPDAPKGSTDPK	148	//10	10//34	2.095	1.57143	R.FINPPK[1632.86]DK.S	4YM7_2_RPA2	1	RPA2	FINPPKDK	30	126.127	27537	127.13	146543	28671.1	154560	5.39081	0.185501	-2.4305
				0	0.129728	JL033021_040221_RPA2HFH_Q2_2to1_100B.07209.07209.4	N	5.146	0.20319		//14	14//58	3.2765	1.72727	R.NPDAPK[1364.79]GSTDPK.E	4YM7_3_RPAC40	1	AC40	NPDAPKGSTDPK	148	//10	9//34	1.8695	1.28571	R.FINPPK[1632.86]DK.S	4YM7_2_RPA2	1	RPA2	FINPPKDK	30	126.127	54207.5	127.131	22565.4	58602.9	19314.3	0.32958	3.03416	1.6013
				0	0.167728	JL033021_040221_RPA2HFH_Q2_5to1_50B.07395.07395.4	N	5.062	0.182595		//14	14//58	3.39	1.68182	R.NPDAPK[1364.79]GSTDPK.E	4YM7_3_RPAC40	1	AC40	NPDAPKGSTDPK	148	//10	9//34	1.672	1.28571	R.FINPPK[1632.86]DK.S	4YM7_2_RPA2	1	RPA2	FINPPKDK	30	126.127	60001.2	127.131	12484	64967.9	7991.11	0.123001	8.13002	3.02326
				0	1.2584	JL033021_040221_RPA2HFH_Q2_2to1_50B.07047.07047.4	N	4.774	0.158502		//14	13//58	3.051	1.54545	R.NPDAPK[1364.79]GSTDPK.E	4YM7_3_RPAC40	1	AC40	NPDAPKGSTDPK	148	//10	10//34	1.723	1.57143	R.FINPPK[1632.86]DK.S	4YM7_2_RPA2	1	RPA2	FINPPKDK	30	126.128	245669	127.131	114601	265489	100750	0.379488	2.63513	1.39787
				0	2.52797	JL033021_040221_RPA2HFH_Q2_1to2_50B.07455.07455.3	N	4.7035	0.206109		//14	9//46	1.8705	0.954545	R.NPDAPK[1364.8]GSTDPK.E	4YM7_3_RPAC40	1	AC40	NPDAPKGSTDPK	148	//10	10//26	2.833	1.78571	R.FINPPK[1632.86]DK.S	4YM7_2_RPA2	1	RPA2	FINPPKDK	30	126.127	34022.2	127.131	55537.1	36444.4	56458.2	1.54916	0.64551	-0.631488
				0	1.93386	JL033021_040221_RPA2HFH_Q2_2to1_50B.06841.06841.3	N	4.692	0.180472		//14	10//46	1.704	0.863636	R.NPDAPK[1364.78]GSTDPK.E	4YM7_3_RPAC40	1	AC40	NPDAPKGSTDPK	148	//10	9//26	2.988	1.57143	R.FINPPK[1632.85]DK.S	4YM7_2_RPA2	1	RPA2	FINPPKDK	30	126.127	77561.8	127.131	32455.9	83849.4	27816.2	0.33174	3.01441	1.59188
				0	1.35755	JL033021_040221_RPA2HFH_Q2_1to2_50B.07241.07241.4	N	4.4995	0.154079		//14	12//58	2.351	1.31818	R.NPDAPK[1364.79]GSTDPK.E	4YM7_3_RPAC40	1	AC40	NPDAPKGSTDPK	148	//10	9//34	2.1485	1.5	R.FINPPK[1632.86]DK.S	4YM7_2_RPA2	1	RPA2	FINPPKDK	30	126.127	38904	127.13	51078.4	41774.7	51242.1	1.22663	0.815242	-0.294699
				0	0.11216	JL033021_040221_RPA2HFH_Q2_1to10_100B.10960.10960.5	N	4.35025	0.177961		//14	17//182	3.3335	0.886364	R.NPDAPK[1364.79]GSTDPKELYNNAHVYAR.D	4YM7_3_RPAC40	1	AC40	NPDAPKGSTDPKELYNNAHVYAR	148	1//10	5//40	1.01675	0.642857	R.FINPPK[2963.5]DK.S	4YM7_2_RPA2	1	RPA2	FINPPKDK	30	126.127	9276.74	127.13	53174.4	9627.84	56147.9	5.83182	0.171473	-2.54395
				0	2.05161	JL033021_040221_RPA2HFH_Q2_10to1_100B.07219.07219.4	N	4.34925	0.170941		//14	13//58	2.9915	1.5	R.NPDAPK[1364.79]GSTDPK.E	4YM7_3_RPAC40	1	AC40	NPDAPKGSTDPK	148	//10	7//34	1.35775	0.928571	R.FINPPK[1632.86]DK.S	4YM7_2_RPA2	1	RPA2	FINPPKDK	30	126.127	52258.5	127.13	8187.81	56606.1	4082.51	0.0721215	13.8655	3.79343
				0	1.8587	JL033021_040221_RPA2HFH_Q2_1to2_50B.07417.07417.3	N	4.34925	0.185929		//14	10//46	1.94775	1	R.NPDAPK[1364.79]GSTDPK.E	4YM7_3_RPAC40	1	AC40	NPDAPKGSTDPK	148	//10	7//26	2.4015	1.21429	R.FINPPK[1632.86]DK.S	4YM7_2_RPA2	1	RPA2	FINPPKDK	30	126.127	36762.5	127.131	46727.7	39487.7	46772.3	1.18448	0.844255	-0.24425
				0	2.60234	JL033021_040221_RPA2HFH_Q2_2to1_50B.07016.07016.3	N	3.8745	0.174704		//14	9//46	1.62275	0.818182	R.NPDAPK[1364.8]GSTDPK.E	4YM7_3_RPAC40	1	AC40	NPDAPKGSTDPK	148	//10	8//26	2.25175	1.28571	R.FINPPK[1632.86]DK.S	4YM7_2_RPA2	1	RPA2	FINPPKDK	30	126.127	61293.9	127.131	26922.2	66252.4	23346.8	0.352392	2.83775	1.50475
				0	2.64652	JL033021_040221_RPA2HFH_Q2_1to1_100B.07145.07145.4	N	3.86275	0.159433		//14	11//58	2.287	1.13636	R.NPDAPK[1364.8]GSTDPK.E	4YM7_3_RPAC40	1	AC40	NPDAPKGSTDPK	148	1//10	8//34	1.57575	1.07143	R.FINPPK[1632.86]DK.S	4YM7_2_RPA2	1	RPA2	FINPPKDK	30	126.127	28100	127.13	25082.3	30269.6	24355.2	0.804607	1.24284	0.313643
				0	3.24143	JL033021_040221_RPA2HFH_Q2_1to2_100B.07173.07173.4	N	3.75775	0.154208		//14	11//58	2.495	1.31818	R.NPDAPK[1364.8]GSTDPK.E	4YM7_3_RPAC40	1	AC40	NPDAPKGSTDPK	148	//10	7//34	1.26275	0.928571	R.FINPPK[1632.86]DK.S	4YM7_2_RPA2	1	RPA2	FINPPKDK	30	126.127	32129.6	127.13	45211.2	34475.9	45563.1	1.32159	0.756663	-0.402278
				-1	0.377453	JL033021_040221_RPA2HFH_Q2_5to1_50B.07567.07567.3	N	3.61675	0.186483		//14	6//46	1.1095	0.590909	R.NPDAPK[1364.79]GSTDPK.E	4YM7_3_RPAC40	1	AC40	NPDAPKGSTDPK	148	//10	8//26	2.50725	1.28571	R.FINPPK[1632.85]DK.S	4YM7_2_RPA2	1	RPA2	FINPPKDK	30	126.127	28865.7	127.13	6466.48	31251.4	4338	0.13881	7.2041	2.84882
				-141	42.518	JL033021_040221_RPA2HFH_Q2_1to5_1ug.07458.07458.4	NP	3.57975	0.109812	0.0775	//14	10//69	2.716	1.33333	R.NPDAPK[1223.69]GSTDPK.E	4YM7_3_RPAC40	1	AC40	NPDAPKGSTDPK	148	//10	4//39	0.86375	0.5625	R.FINPPK[1491.76]DK.S	4YM7_2_RPA2	1	RPA2	FINPPKDK	30	126.127	30536.2	127.131	96066.5	32334.2	100202	3.09894	0.322691	-1.63177
				0	2.60234	JL033021_040221_RPA2HFH_Q2_1to2_50B.07270.07270.3	N	3.55025	0.171212		//14	7//46	1.20525	0.636364	R.NPDAPK[1364.8]GSTDPK.E	4YM7_3_RPAC40	1	AC40	NPDAPKGSTDPK	148	//10	7//26	2.345	1.21429	R.FINPPK[1632.86]DK.S	4YM7_2_RPA2	1	RPA2	FINPPKDK	30	126.127	25814.7	127.131	35778.7	27704.3	36022.4	1.30025	0.769085	-0.378785
				0	4.83324	JL033021_040221_RPA2HFH_Q2_1to5_50B.07468.07468.3	N	3.5345	0.164403		//14	7//46	1.07375	0.636364	R.NPDAPK[1364.8]GSTDPK.E	4YM7_3_RPAC40	1	AC40	NPDAPKGSTDPK	148	//10	8//26	2.46075	1.28571	R.FINPPK[1632.87]DK.S	4YM7_2_RPA2	1	RPA2	FINPPKDK	30	126.127	11807.5	127.131	40092.6	12478.8	41902.5	3.35791	0.297804	-1.74756
				0	4.9076	JL033021_040221_RPA2HFH_Q2_2to1_1ug.07342.07342.3	N	3.47475	0.194364		//14	6//46	1.19275	0.590909	R.NPDAPK[1364.8]GSTDPK.E	4YM7_3_RPAC40	1	AC40	NPDAPKGSTDPK	148	//10	7//26	2.282	1.21429	R.FINPPK[1632.87]DK.S	4YM7_2_RPA2	1	RPA2	FINPPKDK	30	126.127	22392.3	127.13	9377.66	24207.5	8038.71	0.332076	3.01136	1.59042
				-141	43.2543	JL033021_040221_RPA2HFH_Q2_10to1_1ug.07353.07353.4	NP	3.06325	0.0922221	0.253	//14	9//69	2.1655	1	R.NPDAPK[1223.69]GSTDPK.E	4YM7_3_RPAC40	1	AC40	NPDAPKGSTDPK	148	//10	4//39	0.89775	0.5625	R.FINPPK[1491.76]DK.S	4YM7_2_RPA2	1	RPA2	FINPPKDK	30	126.127	172898	127.13	27413.7	187280	13854.4	0.073977	13.5177	3.75678
				-141	44.4112	JL033021_040221_RPA2HFH_Q2_1to1_50B.07599.07599.4	NP	2.842	0.0910343	0.191	//14	9//69	1.8965	1	R.NPDAPK[1223.69]GSTDPK.E	4YM7_3_RPAC40	1	AC40	NPDAPKGSTDPK	148	//10	5//39	0.9455	0.625	R.FINPPK[1491.76]DK.S	4YM7_2_RPA2	1	RPA2	FINPPKDK	30	126.127	61024.9	127.131	50094.4	65772.2	48201.9	0.732861	1.36451	0.448388
				-141	48.5132	JL033021_040221_RPA2HFH_Q2_2to1_1ug.07354.07354.4	NP	2.62275	0.0816929	0.459	//14	8//69	1.759	0.833333	R.NPDAPK[1223.69]GSTDPK.E	4YM7_3_RPAC40	1	AC40	NPDAPKGSTDPK	148	//10	4//39	0.86375	0.5625	R.FINPPK[1491.76]DK.S	4YM7_2_RPA2	1	RPA2	FINPPKDK	30	126.127	125805	127.13	49953.5	136026	42235.3	0.310495	3.22066	1.68736
				-141	45.6734	JL033021_040221_RPA2HFH_Q2_10to1_50B.07424.07424.4	NP	2.5865	0.0790411	0.00745	//14	9//69	1.7395	1	R.NPDAPK[1223.69]GSTDPK.E	4YM7_3_RPAC40	1	AC40	NPDAPKGSTDPK	148	//10	4//39	0.847	0.5625	R.FINPPK[1491.76]DK.S	4YM7_2_RPA2	1	RPA2	FINPPKDK	30	126.127	154596	127.131	23105.8	167467	10881.1	0.0649748	15.3906	3.94398
				-141	43.2543	JL033021_040221_RPA2HFH_Q2_5to1_50B.07550.07550.4	NP	2.35975	0.0728779	0.205	//14	8//69	1.5	0.75	R.NPDAPK[1223.69]GSTDPK.E	4YM7_3_RPAC40	1	AC40	NPDAPKGSTDPK	148	//10	5//39	0.85975	0.625	R.FINPPK[1491.76]DK.S	4YM7_2_RPA2	1	RPA2	FINPPKDK	30	126.127	188965	127.13	40012.6	204601	25912.9	0.126651	7.89571	2.98107
				-141	43.1491	JL033021_040221_RPA2HFH_Q2_1to5_50B.07451.07451.4	NP	2.3535	0.0663369	0.0346	//14	7//69	1.37275	0.583333	R.NPDAPK[1223.69]GSTDPK.E	4YM7_3_RPAC40	1	AC40	NPDAPKGSTDPK	148	//10	6//39	0.98075	0.8125	R.FINPPK[1491.76]DK.S	4YM7_2_RPA2	1	RPA2	FINPPKDK	30	126.128	48004.6	127.131	158593	50769.6	165636	3.2625	0.306514	-1.70598
				-141	43.7596	JL033021_040221_RPA2HFH_Q2_10to1_1ug.07433.07433.3	NP	2.235	0.0813393	0.0957	//14	7//52	1.1075	0.583333	R.NPDAPK[1223.69]GSTDPK.E	4YM7_3_RPAC40	1	AC40	NPDAPKGSTDPK	148	//10	4//31	1.1275	0.5625	R.FINPPK[1491.76]DK.S	4YM7_2_RPA2	1	RPA2	FINPPKDK	30	126.127	98306	127.131	14142.2	106495	6329.35	0.0594333	16.8256	4.07258
				-141	42.9387	JL033021_040221_RPA2HFH_Q2_1to10_1ug.07454.07454.4	P	2.18125	0.0676115	0.166	//14	8//69	1.35025	0.625	R.NPDAPK[1223.69]GSTDPK.E	4YM7_3_RPAC40	1	AC40	NPDAPKGSTDPK	148	//10	4//39	0.831	0.5625	R.FINPPK[1491.76]DK.S	4YM7_2_RPA2	1	RPA2	FINPPKDK	30	126.127	31277.1	127.13	165950	32569.3	175022	5.37381	0.186088	-2.42595
				-141	44.2009	JL033021_040221_RPA2HFH_Q2_1to10_50B.07576.07576.4	NP	2.07825	0.0631131	0.456	//14	8//69	1.345	0.833333	R.NPDAPK[1223.69]GSTDPK.E	4YM7_3_RPAC40	1	AC40	NPDAPKGSTDPK	148	//10	5//39	0.73325	0.625	R.FINPPK[1491.76]DK.S	4YM7_2_RPA2	1	RPA2	FINPPKDK	30	126.127	26015.4	127.13	158053	26927.4	167031	6.20302	0.161212	-2.63297
				1120	-120.251	JL033021_040221_RPA2HFH_Q2_10to1_1ug.10915.10915.4	P	2.051	0.0763418	0.531	//12	14//141	1.7795	0.652174	R.NPDAPK[1223.69]GSTDPKELYNNAHVYAR.D	4YM7_3_RPAC40	1	AC40	NPDAPKGSTDPKELYNNAHVYAR	148	//10	3//36	0.2715	0.3125	R.FINPPK[2822.4]DK.S	4YM7_2_RPA2	1	RPA2	FINPPKDK	30	126.127	153265	127.13	26617.4	165994	14763.7	0.0889413	11.2434	3.491
				-141	42.5763	JL033021_040221_RPA2HFH_Q2_1to10_50B.07587.07587.3	NP	1.8695	0.0817482	0.522	//14	5//52	0.8635	0.5	R.NPDAPK[1223.69]GSTDPK.E	4YM7_3_RPAC40	1	AC40	NPDAPKGSTDPK	148	//10	4//31	1.006	0.5625	R.FINPPK[1491.76]DK.S	4YM7_2_RPA2	1	RPA2	FINPPKDK	30	126.127	8194.96	127.131	49659	8483.28	52478	6.18605	0.161654	-2.62902
				-141	45.495	JL033021_040221_RPA2HFH_Q2_1to5_50B.07446.07446.3	NP	1.796	0.0800535	0.0767	1//14	7//52	0.9825	0.583333	R.NPDAPK[1223.69]GSTDPK.E	4YM7_3_RPAC40	1	AC40	NPDAPKGSTDPK	148	//10	4//31	0.8135	0.5625	R.FINPPK[1491.76]DK.S	4YM7_2_RPA2	1	RPA2	FINPPKDK	30	126.127	18679.4	127.131	58092.2	19784.8	60573.6	3.06162	0.326624	-1.6143
				-141	44.0957	JL033021_040221_RPA2HFH_Q2_10to1_1ug.07510.07510.4	P	1.72475	0.0612939	0.617	//14	7//69	1.30375	0.708333	R.NPDAPK[1223.69]GSTDPK.E	4YM7_3_RPAC40	1	AC40	NPDAPKGSTDPK	148	//10	3//39	0.421	0.3125	R.FINPPK[1491.76]DK.S	4YM7_2_RPA2	1	RPA2	FINPPKDK	30	126.127	105024	127.13	18380.1	113746	10267.4	0.0902664	11.0783	3.46967
				-142	43.9905	JL033021_040221_RPA2HFH_Q2_1to10_1ug.07599.07599.4	P	1.56975	0.0493415	0.476	1//14	7//69	1.228	0.75	R.NPDAPK[1223.69]GSTDPK.E	4YM7_3_RPAC40	1	AC40	NPDAPKGSTDPK	148	//10	3//39	0.34175	0.3125	R.FINPPK[1491.76]DK.S	4YM7_2_RPA2	1	RPA2	FINPPKDK	30	126.127	8757.37	127.131	55478.3	9045.86	58663.3	6.4851	0.1542	-2.69713
				-141	43.9905	JL033021_040221_RPA2HFH_Q2_5to1_100B.07195.07195.4	P	1.5445	0.0687239	0.572	//14	6//69	1.1185	0.541667	R.NPDAPK[1223.69]GSTDPK.E	4YM7_3_RPAC40	1	AC40	NPDAPKGSTDPK	148	//10	3//39	0.426	0.3125	R.FINPPK[1491.76]DK.S	4YM7_2_RPA2	1	RPA2	FINPPKDK	30	126.127	40985.3	127.13	9417.92	44370.7	6412.71	0.144526	6.91917	2.7906
				-141	43.444	JL033021_040221_RPA2HFH_Q2_1to10_50B.07431.07431.3	NP	1.52375	0.064496	0.41	//14	8//52	1.09375	0.625	R.NPDAPK[1223.69]GSTDPK.E	4YM7_3_RPAC40	1	AC40	NPDAPKGSTDPK	148	//10	3//31	0.43	0.3125	R.FINPPK[1491.76]DK.S	4YM7_2_RPA2	1	RPA2	FINPPKDK	30	126.127	10571.6	127.131	69095.6	10902.6	73092.6	6.70417	0.149161	-2.74506
				-141	47.2305	JL033021_040221_RPA2HFH_Q2_1to5_50B.07319.07319.3	P	1.51625	0.0706218	0.138	//14	5//52	0.6535	0.375	R.NPDAPK[1223.69]GSTDPK.E	4YM7_3_RPAC40	1	AC40	NPDAPKGSTDPK	148	//10	4//31	0.86275	0.5625	R.FINPPK[1491.76]DK.S	4YM7_2_RPA2	1	RPA2	FINPPKDK	30	126.127	14797.3	127.13	50616.3	15635.5	52911.1	3.38403	0.295505	-1.75874
				-143	47.5723	JL033021_040221_RPA2HFH_Q2_1to10_50B.07563.07563.3	P	1.4505	0.0616526	0.418	//14	7//52	1.0535	0.583333	R.NPDAPK[1223.69]GSTDPK.E	4YM7_3_RPAC40	1	AC40	NPDAPKGSTDPK	148	//10	3//31	0.397	0.3125	R.FINPPK[1491.76]DK.S	4YM7_2_RPA2	1	RPA2	FINPPKDK	30	126.127	10794.4	127.131	63287.6	11191.4	66848.8	5.97323	0.167414	-2.57851
				-141	42.0127	JL033021_040221_RPA2HFH_Q2_10to1_1ug.07459.07459.5	P	1.41475	0.0504511	0.449	//14	6//86	0.971	0.541667	R.NPDAPK[1223.69]GSTDPK.E	4YM7_3_RPAC40	1	AC40	NPDAPKGSTDPK	148	//10	4//47	0.44375	0.375	R.FINPPK[1491.76]DK.S	4YM7_2_RPA2	1	RPA2	FINPPKDK	30	126.127	157371	127.131	25466.4	170457	13161.7	0.0772143	12.951	3.69499
				-141	43.6807	JL033021_040221_RPA2HFH_Q2_10to1_50B.07398.07398.3	NP	1.3865	0.0664112	0.0589	//14	6//52	0.99675	0.541667	R.NPDAPK[1223.69]GSTDPK.E	4YM7_3_RPAC40	1	AC40	NPDAPKGSTDPK	148	//10	3//31	0.38975	0.3125	R.FINPPK[1491.76]DK.S	4YM7_2_RPA2	1	RPA2	FINPPKDK	30	126.127	30181.1	127.13	4961.23	32690.1	2606.92	0.0797463	12.5398	3.64844
				-141	44.2329	JL033021_040221_RPA2HFH_Q2_1to1_50B.07457.07457.3	P	1.2245	0.0745533	0.662	//14	4//52	0.668	0.333333	R.NPDAPK[1223.69]GSTDPK.E	4YM7_3_RPAC40	1	AC40	NPDAPKGSTDPK	148	//10	3//31	0.5565	0.3125	R.FINPPK[1491.76]DK.S	4YM7_2_RPA2	1	RPA2	FINPPKDK	30	126.127	15382.2	127.13	11511.5	16587.9	10954.6	0.660399	1.51424	0.598589
				-141	42.8919	JL033021_040221_RPA2HFH_Q2_10to1_1ug.07322.07322.3	P	0.91625	0.0664094	0.657	//14	4//52	0.53475	0.25	R.NPDAPK[1223.69]GSTDPK.E	4YM7_3_RPAC40	1	AC40	NPDAPKGSTDPK	148	//10	3//31	0.3815	0.3125	R.FINPPK[1491.76]DK.S	4YM7_2_RPA2	1	RPA2	FINPPKDK	30	126.126	18234.4	127.13	2603.61	19753.5	1153.02	0.0583707	17.1319	4.09861
				-141	45.9683	JL033021_040221_RPA2HFH_Q2_1to10_100B.07090.07090.3	P	0.50025	0.0699504	0.581	//14	2//52	0.3835	0.166667	R.NPDAPK[1223.69]GSTDPK.E	4YM7_3_RPAC40	1	AC40	NPDAPKGSTDPK	148	//10	2//31	0.11675	0.125	R.FINPPK[1491.76]DK.S	4YM7_2_RPA2	1	RPA2	FINPPKDK	30			127.13	4890.07	-39.7735	5240.11	-131.749	-0.0075902	#NUM!
	5	AC40:148---RPA2:32	11.5265
				-3	4.57452	JL033021_040221_RPA2HFH_Q2_1to2_100B.21831.21831.7	N	11.5265	0.290585		//11	27//250	10.3933	0.890244	R.FINPPK[1632.83]DK[425.27]SAFPLLQEAVQPHIGSFNALTEGPDGGLLNLGVK.D	4YM7_2_RPA2	1	RPA2	FINPPKDKSAFPLLQEAVQPHIGSFNALTEGPDGGLLNLGVK	32	1//14	6//55	1.13325	0.590909	R.NPDAPK[5132.76]GSTDPK.E	4YM7_3_RPAC40	1	AC40	NPDAPKGSTDPK	148	126.127	22858.2	127.13	38846.6	24473	39575.2	1.61709	0.618393	-0.693404
				-3	0.977442	JL033021_040221_RPA2HFH_Q2_1to2_1ug.20316.20316.7	N	9.811	0.274814		//11	25//250	8.69075	0.756098	R.FINPPK[1632.86]DK[425.27]SAFPLLQEAVQPHIGSFNALTEGPDGGLLNLGVK.D	4YM7_2_RPA2	1	RPA2	FINPPKDKSAFPLLQEAVQPHIGSFNALTEGPDGGLLNLGVK	32	//14	6//55	1.12025	0.590909	R.NPDAPK[5132.79]GSTDPK.E	4YM7_3_RPAC40	1	AC40	NPDAPKGSTDPK	148	126.127	26198.8	127.13	45182.8	28044.3	46065.1	1.64258	0.608798	-0.715965
	6	AC40:148---RPA2:120	5.0045
				0	0.0855623	JL033021_040221_RPA2HFH_Q2_1to2_50B.05956.05956.4	N	5.0045	0.197795		//14	15//58	2.98375	1.72727	R.NPDAPK[1371.76]GSTDPK.E	4YM7_3_RPAC40	1	AC40	NPDAPKGSTDPK	148	//9	9//40	2.02075	1.375	R.K[1632.86]VYPSESR.Q	4YM7_2_RPA2	1	RPA2	KVYPSESR	120	126.127	40868.7	127.131	66572.4	43779.4	67668.8	1.54568	0.646965	-0.62824
				-141	40.3168	JL033021_040221_RPA2HFH_Q2_1to10_50B.06039.06039.4	NP	3.93725	0.148634	0.00223	//14	10//68	1.346	0.708333	R.NPDAPK[1230.66]GSTDPK.E	4YM7_3_RPAC40	1	AC40	NPDAPKGSTDPK	148	//9	8//43	2.59125	1.5625	R.K[1491.76]VYPSESR.Q	4YM7_2_RPA2	1	RPA2	KVYPSESR	120	126.127	15580.2	127.13	102739	16060.6	108694	6.76776	0.147759	-2.75868
				-141	42.9384	JL033021_040221_RPA2HFH_Q2_5to1_50B.06006.06006.4	NP	3.58825	0.144609	9.68e-05	//14	8//68	1.27825	0.75	R.NPDAPK[1230.66]GSTDPK.E	4YM7_3_RPAC40	1	AC40	NPDAPKGSTDPK	148	//9	7//43	2.31	1.5	R.K[1491.76]VYPSESR.Q	4YM7_2_RPA2	1	RPA2	KVYPSESR	120	126.127	54633.8	127.131	14487.6	59130.8	10620	0.179602	5.56785	2.47712
				-141	40.4216	JL033021_040221_RPA2HFH_Q2_2to1_50B.05581.05581.4	NP	3.2815	0.118725	0.000491	//14	8//68	1.47725	0.708333	R.NPDAPK[1230.66]GSTDPK.E	4YM7_3_RPAC40	1	AC40	NPDAPKGSTDPK	148	//9	6//43	1.80425	1.0625	R.K[1491.76]VYPSESR.Q	4YM7_2_RPA2	1	RPA2	KVYPSESR	120	126.127	112771	127.131	53053.9	121865	46727.8	0.383438	2.60798	1.38293
				-141	41.5751	JL033021_040221_RPA2HFH_Q2_1to5_50B.05961.05961.4	NP	3.08225	0.11758	3.49e-05	//14	8//68	1.314	0.625	R.NPDAPK[1230.66]GSTDPK.E	4YM7_3_RPAC40	1	AC40	NPDAPKGSTDPK	148	//9	6//43	1.76825	1.0625	R.K[1491.76]VYPSESR.Q	4YM7_2_RPA2	1	RPA2	KVYPSESR	120	126.127	22582.1	127.131	80152.8	23837.6	83863	3.51809	0.284245	-1.81479
				-141	44.5113	JL033021_040221_RPA2HFH_Q2_1to1_50B.06047.06047.4	NP	2.76175	0.115562	4.78e-10	//14	7//68	1.133	0.583333	R.NPDAPK[1230.66]GSTDPK.E	4YM7_3_RPAC40	1	AC40	NPDAPKGSTDPK	148	//9	7//43	1.62875	1.3125	R.K[1491.76]VYPSESR.Q	4YM7_2_RPA2	1	RPA2	KVYPSESR	120	126.127	17862.8	127.13	15575	19244.9	15086.3	0.783912	1.27565	0.351236
				-143	43.4627	JL033021_040221_RPA2HFH_Q2_5to1_1ug.05899.05899.4	P	2.76075	0.100354	0.0674	1//14	9//68	1.23375	0.791667	R.NPDAPK[1230.66]GSTDPK.E	4YM7_3_RPAC40	1	AC40	NPDAPKGSTDPK	148	//9	8//43	1.527	1.5625	R.K[1491.76]VYPSESR.Q	4YM7_2_RPA2	1	RPA2	KVYPSESR	120	126.127	28787	127.131	6388.85	31166.6	4261.88	0.136745	7.31288	2.87044
				-141	42.2043	JL033021_040221_RPA2HFH_Q2_10to1_1ug.05905.05905.4	P	2.42575	0.0989961	0.0188	//14	10//68	1.26375	0.916667	R.NPDAPK[1230.66]GSTDPK.E	4YM7_3_RPAC40	1	AC40	NPDAPKGSTDPK	148	//9	7//43	1.162	1.0625	R.K[1491.76]VYPSESR.Q	4YM7_2_RPA2	1	RPA2	KVYPSESR	120	126.127	48161.7	127.131	8861.46	52157.8	5172.17	0.0991639	10.0843	3.33404
				-141	45.9794	JL033021_040221_RPA2HFH_Q2_1to2_1ug.05988.05988.4	P	2.30675	0.0797838	0.00702	//14	8//68	1.21175	0.625	R.NPDAPK[1230.66]GSTDPK.E	4YM7_3_RPAC40	1	AC40	NPDAPKGSTDPK	148	//9	5//43	1.095	0.75	R.K[1491.76]VYPSESR.Q	4YM7_2_RPA2	1	RPA2	KVYPSESR	120	126.127	16326.7	127.13	25840.8	17495.6	26224.8	1.49894	0.667139	-0.583942
				-141	30.6692	JL033021_040221_RPA2HFH_Q2_1to1_1ug.05862.05862.4	P	2.259	0.0833256	0.274	//14	9//68	1.1675	0.791667	R.NPDAPK[1230.66]GSTDPK.E	4YM7_3_RPAC40	1	AC40	NPDAPKGSTDPK	148	//9	6//43	1.0915	1.0625	R.K[1491.76]VYPSESR.Q	4YM7_2_RPA2	1	RPA2	KVYPSESR	120	126.127	17469.8	127.131	16340.5	18812.5	15941.8	0.847404	1.18007	0.238878
	7	AC40:168---RPA2:930	9.91225
				-142	42.0586	JL033021_040221_RPA2HFH_Q2_5to1_100B.19198.19198.6	P	9.91225	0.32007	0.379	//16	24//244	9.8685	1.125	R.K[1354.72]WPTIDMPFSETGIQPDIIINPHAFPSR.M	4YM7_2_RPA2	1	RPA2	KWPTIDMPFSETGIQPDIIINPHAFPSR	930	//11	2//52	0.04375	0.111111	R.DLK[3472.79]FEPQGR.Q	4YM7_3_RPAC40	1	AC40	DLKFEPQGR	168	126.127	60199.1	127.13	17095.1	65145	12914.6	0.198243	5.0443	2.33466
11	AC40---RPA14
	1	AC40:38---RPA14:1	2.68
				-141	36.0308	JL033021_040221_RPA2HFH_Q2_1to10_1ug.15623.15623.3	P	2.68	0.085235	0.212	//14	10//64	2.292	0.653846	K.K[990.5]DFEVNISSLDAR.E	4YM7_3_RPAC40	1	AC40	KDFEVNISSLDAR	38	//7	5//22	0.388	0.75	-.M[1761.86]M[147.04]KGSR.R	4YM7_4_RPA14	1	RPA14	MMKGSR	1	126.127	8437.22	127.13	57842.2	8679.44	61225.2	7.05404	0.141763	-2.81845
12	RPA1---RPB12
	1	RPA1:469---RPB12:1	10.9
				-141	24.485	JL033021_040221_RPA2HFH_Q2_2to1_1ug.15625.15625.3	P	10.9	0.429218	0.624	//18	21//95	10.6907	1.52174	-.M[1633.78]SREGFQIPTNLDAAAAGTSQAR.T	4YM7_12_RPB12	1	RPB12	MSREGFQIPTNLDAAAAGTSQAR	1	//13	4//41	0.20925	0.272727	K.EGLFRK[2657.32]HM[147.04]M[147.04]GK.R	4YM7_1_RPA1	1	RPA1	EGLFRKHMMGK	469	126.127	6627.33	127.13	3163.49	7161.41	2794.98	0.390284	2.56224	1.3574
				-140	18.9989	JL033021_040221_RPA2HFH_Q2_1to10_1ug.15675.15675.3	P	10.8238	0.46085	0.273	1//18	24//95	10.6557	1.65217	-.M[1633.78]SREGFQIPTNLDAAAAGTSQAR.T	4YM7_12_RPB12	1	RPB12	MSREGFQIPTNLDAAAAGTSQAR	1	//13	3//41	0.168	0.227273	K.EGLFRK[2657.32]HM[147.04]M[147.04]GK.R	4YM7_1_RPA1	1	RPA1	EGLFRKHMMGK	469	126.127	859.197	127.13	6238.17	881.034	6607.58	7.4998	0.133337	-2.90685
				-140	14.0144	JL033021_040221_RPA2HFH_Q2_10to1_1ug.15624.15624.3	P	10.6698	0.414923	0.311	1//18	21//95	10.49	1.52174	-.M[1633.78]SREGFQIPTNLDAAAAGTSQAR.T	4YM7_12_RPB12	1	RPB12	MSREGFQIPTNLDAAAAGTSQAR	1	1//13	5//41	0.17975	0.227273	K.EGLFRK[2657.32]HM[147.04]M[147.04]GK.R	4YM7_1_RPA1	1	RPA1	EGLFRKHMMGK	469	126.127	7291.41	127.13	1512.34	7895.01	966.024	0.122359	8.17268	3.03081
				-140	21.162	JL033021_040221_RPA2HFH_Q2_10to1_1ug.15612.15612.3	P	10.5497	0.44821	0.651	1//18	22//95	10.4635	1.54348	-.M[1633.78]SREGFQIPTNLDAAAAGTSQAR.T	4YM7_12_RPB12	1	RPB12	MSREGFQIPTNLDAAAAGTSQAR	1	//13	3//41	0.08625	0.136364	K.EGLFRK[2657.32]HM[147.04]M[147.04]GK.R	4YM7_1_RPA1	1	RPA1	EGLFRKHMMGK	469	126.127	7150.97	127.131	1351.03	7744.02	805.776	0.104051	9.61063	3.26463
	2	RPA1:135---RPB12:49	11.3473
				-140	8.04613	JL033021_040221_RPA2HFH_Q2_1to2_D.22746.22746.5	P	11.3473	0.486798	4.54e-13	//2	21//392	11.1065	0.712766	K.LRLLQYGLIDESYK[1739.82]LDEITLGSLNSSM[147.04]YTDDEAIEDNEDEM[147.04]DGEGSK.Q	4YM7_1_RPA1	1	RPA1	LRLLQYGLIDESYKLDEITLGSLNSSMYTDDEAIEDNEDEMDGEGSK	135	1//14	4//85	0.24075	0.166667	R.TDAVRC[160.03]K[5611.58]DC[160.03]GHR.I	4YM7_12_RPB12	1	RPB12	TDAVRCKDCGHR	49	126.127	4784.39	127.13	6059.65	5139.24	6063.9	1.17992	0.847514	-0.238691
				-141	14.1522	JL033021_040221_RPA2HFH_Q2_1to5_D.22725.22725.5	P	8.27525	0.437173	6.85e-06	//2	16//392	8.102	0.56383	K.LRLLQYGLIDESYK[1739.82]LDEITLGSLNSSM[147.04]YTDDEAIEDNEDEM[147.04]DGEGSK.Q	4YM7_1_RPA1	1	RPA1	LRLLQYGLIDESYKLDEITLGSLNSSMYTDDEAIEDNEDEMDGEGSK	135	//14	3//85	0.17325	0.125	R.TDAVRC[160.03]K[5611.58]DC[160.03]GHR.I	4YM7_12_RPB12	1	RPB12	TDAVRCKDCGHR	49	126.127	3448.43	127.13	9309.23	3664	9666.02	2.6381	0.37906	-1.3995
				-142	17.9772	JL033021_040221_RPA2HFH_Q2_1to10_D.22737.22737.5	P	7.469	0.431397	0.000459	//2	16//392	7.289	0.521277	K.LRLLQYGLIDESYK[1739.82]LDEITLGSLNSSM[147.04]YTDDEAIEDNEDEM[147.04]DGEGSK.Q	4YM7_1_RPA1	1	RPA1	LRLLQYGLIDESYKLDEITLGSLNSSMYTDDEAIEDNEDEMDGEGSK	135	//14	3//85	0.18	0.125	R.TDAVRC[160.03]K[5611.58]DC[160.03]GHR.I	4YM7_12_RPB12	1	RPB12	TDAVRCKDCGHR	49	126.127	2789.61	127.13	14312.2	2908.84	15086.3	5.18634	0.192814	-2.37472
13	RPA1---RPA14
	1	RPA14:130---RPA1:597	0.07825
				-140	30.5544	JL033021_040221_RPA2HFH_Q2_10to1_D.19386.19386.4	P	0.07825	0.00267069	0.412	//15	1//71	0.07825	0.0384615	R.QPTLHK[1481.81]ASM[147.04]M[147.04]GHK.V	4YM7_1_RPA1	1	RPA1	QPTLHKASMMGHK	597	//16	//71	0	0	K.E[111.03]TSIGVSATGGK[1762.89]K.T	4YM7_4_RPA14	1	RPA14	ETSIGVSATGGKK	130	126.127	6287.83	127.13	3870.97	6787.47	3583.59	0.527971	1.89404	0.92147
14	RPA1---RPB6
	1	RPA1:604---RPB6:72	0.7345
				-141	51.4933	JL033021_040221_RPA2HFH_Q2_5to1_100B.06451.06451.4	P	0.7345	0.0312899	0.454	//11	4//49	0.5945	0.444444	K.ASM[147.04]M[147.04]GHK[932.57]VR.V	4YM7_1_RPA1	1	RPA1	ASMMGHKVR	604	//9	2//33	0.14	0.333333	K.E[111.03]K[1313.66]AIPK.D	4YM7_6_RPB6	1	RPB6	EKAIPK	72	126.127	171780	127.13	43387.6	185937	31072.2	0.167111	5.98406	2.58112
	2	RPA1:504---RPB6:72	8.4565
				-143	22.6619	JL033021_040221_RPA2HFH_Q2_1to10_1ug.20699.20699.6	P	8.4565	0.234444	0.175	//	34//322	8.3335	0.910256	R.SVISPDPNIETNEIGVPPVFAVK[932.57]LTYPEPVTAYNIAELR.Q	4YM7_1_RPA1	1	RPA1	SVISPDPNIETNEIGVPPVFAVKLTYPEPVTAYNIAELR	504	//9	2//35	0.123	0.333333	K.E[111.03]K[4518.39]AIPK.D	4YM7_6_RPB6	1	RPB6	EKAIPK	72	126.127	12443.3	127.13	71196.3	12915.3	75175.6	5.82068	0.171801	-2.54119
				-141	21.817	JL033021_040221_RPA2HFH_Q2_1to2_1ug.20739.20739.6	P	8.1355	0.220651	0.022	//	32//322	8.045	0.858974	R.SVISPDPNIETNEIGVPPVFAVK[932.57]LTYPEPVTAYNIAELR.Q	4YM7_1_RPA1	1	RPA1	SVISPDPNIETNEIGVPPVFAVKLTYPEPVTAYNIAELR	504	//9	2//35	0.0905	0.333333	K.E[111.03]K[4518.39]AIPK.D	4YM7_6_RPB6	1	RPB6	EKAIPK	72	126.127	29567.3	127.13	48326.4	31671.8	49131.3	1.55126	0.644635	-0.633445
				-141	19.065	JL033021_040221_RPA2HFH_Q2_10to1_1ug.20458.20458.6	P	8.133	0.22684	0.36	//	34//322	8.133	0.910256	R.SVISPDPNIETNEIGVPPVFAVK[932.57]LTYPEPVTAYNIAELR.Q	4YM7_1_RPA1	1	RPA1	SVISPDPNIETNEIGVPPVFAVKLTYPEPVTAYNIAELR	504	//9	//35	0	0	K.E[111.03]K[4518.39]AIPK.D	4YM7_6_RPB6	1	RPB6	EKAIPK	72	126.127	136308	127.13	25339.5	147616	14916.6	0.10105	9.89609	3.30686
				-143	22.4446	JL033021_040221_RPA2HFH_Q2_10to1_1ug.20495.20495.6	P	7.15375	0.189964	0.585	//	30//322	7.13975	0.782051	R.SVISPDPNIETNEIGVPPVFAVK[932.57]LTYPEPVTAYNIAELR.Q	4YM7_1_RPA1	1	RPA1	SVISPDPNIETNEIGVPPVFAVKLTYPEPVTAYNIAELR	504	//9	1//35	0.014	0.0833333	K.E[111.03]K[4518.39]AIPK.D	4YM7_6_RPB6	1	RPB6	EKAIPK	72	126.127	82479	127.13	17247.8	89305.6	11078.1	0.124047	8.06148	3.01105
				-141	15.7336	JL033021_040221_RPA2HFH_Q2_1to2_1ug.20565.20565.6	P	5.93575	0.161197	0.0575	//	26//322	5.88525	0.666667	R.SVISPDPNIETNEIGVPPVFAVK[932.57]LTYPEPVTAYNIAELR.Q	4YM7_1_RPA1	1	RPA1	SVISPDPNIETNEIGVPPVFAVKLTYPEPVTAYNIAELR	504	//9	2//35	0.0505	0.333333	K.E[111.03]K[4518.39]AIPK.D	4YM7_6_RPB6	1	RPB6	EKAIPK	72	126.127	26306.6	127.13	44250.8	28168.8	45056.8	1.59953	0.625183	-0.677648
				-143	19.9823	JL033021_040221_RPA2HFH_Q2_1to2_D.23685.23685.6	P	0.5765	0.0252818	0.142	//	5//322	0.49075	0.0641026	R.SVISPDPNIETNEIGVPPVFAVK[932.57]LTYPEPVTAYNIAELR.Q	4YM7_1_RPA1	1	RPA1	SVISPDPNIETNEIGVPPVFAVKLTYPEPVTAYNIAELR	504	//9	1//35	0.08575	0.0833333	K.E[111.03]K[4518.39]AIPK.D	4YM7_6_RPB6	1	RPB6	EKAIPK	72	126.127	8135.8	127.13	12466	8721.63	12628	1.44789	0.69066	-0.533952
	3	RPA1:1659---RPB6:129	4.669
				-141	35.3315	JL033021_040221_RPA2HFH_Q2_2to1_50B.17724.17724.4	P	4.669	0.146865	0.211	//19	16//116	4.27675	1.10526	K.LNNVGTGSFDVLAK[1103.74]VPNAA.-	4YM7_1_RPA1	1	RPA1	LNNVGTGSFDVLAKVPNAA	1659	1//8	5//32	0.39225	0.5	K.K[2152.15]IPLVIR.R	4YM7_6_RPB6	1	RPB6	KIPLVIR	129	126.127	107227	127.131	47498.9	115899	41272.8	0.356112	2.80811	1.4896
				-141	39.5119	JL033021_040221_RPA2HFH_Q2_5to1_50B.18131.18131.4	P	4.6015	0.141289	0.229	//19	16//116	4.26025	1.10526	K.LNNVGTGSFDVLAK[1103.74]VPNAA.-	4YM7_1_RPA1	1	RPA1	LNNVGTGSFDVLAKVPNAA	1659	1//8	4//32	0.34125	0.428571	K.K[2152.15]IPLVIR.R	4YM7_6_RPB6	1	RPB6	KIPLVIR	129	126.127	53514.6	127.13	12616.8	57932.3	8715.8	0.150448	6.64681	2.73266
				-141	37.2084	JL033021_040221_RPA2HFH_Q2_1to10_50B.18094.18094.4	P	4.51125	0.144109	0.0785	//19	16//116	4.148	1.10526	K.LNNVGTGSFDVLAK[1103.74]VPNAA.-	4YM7_1_RPA1	1	RPA1	LNNVGTGSFDVLAKVPNAA	1659	1//8	5//32	0.36325	0.5	K.K[2152.15]IPLVIR.R	4YM7_6_RPB6	1	RPB6	KIPLVIR	129	126.127	14560.7	127.13	85744	15093.2	90574.6	6.00101	0.166639	-2.5852
				-141	40.0238	JL033021_040221_RPA2HFH_Q2_1to5_50B.17957.17957.4	P	4.4975	0.139341	0.226	//19	13//116	4.135	0.947368	K.LNNVGTGSFDVLAK[1103.74]VPNAA.-	4YM7_1_RPA1	1	RPA1	LNNVGTGSFDVLAKVPNAA	1659	1//8	5//32	0.3625	0.5	K.K[2152.15]IPLVIR.R	4YM7_6_RPB6	1	RPB6	KIPLVIR	129	126.127	20947.5	127.131	74604	22110.2	78063.8	3.53067	0.283232	-1.81994
				-141	33.4545	JL033021_040221_RPA2HFH_Q2_1to1_50B.18197.18197.4	P	4.25225	0.141442	0.00553	//19	12//116	3.8435	0.868421	K.LNNVGTGSFDVLAK[1103.74]VPNAA.-	4YM7_1_RPA1	1	RPA1	LNNVGTGSFDVLAKVPNAA	1659	1//8	4//32	0.40875	0.428571	K.K[2152.15]IPLVIR.R	4YM7_6_RPB6	1	RPB6	KIPLVIR	129	126.127	26065	127.13	24274.6	28069.3	23672.3	0.843354	1.18574	0.24579
				-438	81.1924	JL033021_040221_RPA2HFH_Q2_1to10_50B.18307.18307.5	P	3.50925	0.102129	0.622	//19	16//146	3.2955	0.868421	K.LNNVGTGSFDVLAK[1674.04]VPNAA.-	4YM7_1_RPA1	1	RPA1	LNNVGTGSFDVLAKVPNAA	1659	//14	3//83	0.21375	0.208333	K.ELAEKK[2152.15]IPLVIR.R	4YM7_6_RPB6	1	RPB6	ELAEKKIPLVIR	129	126.127	13553	127.13	111184	13793.5	117926	8.54936	0.116968	-3.09582
				-141	39	JL033021_040221_RPA2HFH_Q2_10to1_50B.18358.18358.4	P	2.6855	0.0932789	0.0203	//19	9//116	2.4285	0.657895	K.LNNVGTGSFDVLAK[1103.74]VPNAA.-	4YM7_1_RPA1	1	RPA1	LNNVGTGSFDVLAKVPNAA	1659	//8	3//32	0.257	0.357143	K.K[2152.15]IPLVIR.R	4YM7_6_RPB6	1	RPB6	KIPLVIR	129	126.127	25832.7	127.13	5654.19	27968.7	3739.86	0.133716	7.47856	2.90276
15	RPA1---RPA43
	1	RPA1:232---RPA43:5	2.813
				-3	7.63823	JL033021_040221_RPA2HFH_Q2_5to1_100B.09033.09033.5	N	2.813	0.151408		//12	6//81	1.786	0.909091	R.GK[1154.69]C[160.03]DNC[160.03]GM[147.04]FSPK.F	4YM7_1_RPA1	1	RPA1	GKCDNCGMFSPK	232	3//8	4//30	1.027	0.9	-.MSQVK[1822.84]R.A	4YM7_7_RPA43	1	RPA43	MSQVKR	5	126.127	88606	127.13	20386.1	95924.7	13890.9	0.144811	6.90557	2.78776
16	RPA1---RPA2
	1	RPA1:1363---RPA2:120	5.33075
				0	3.88889	JL033021_040221_RPA2HFH_Q2_1to2_50B.06696.06696.5	N	5.33075	0.203014		//16	11//94	2.0785	0.923077	R.LQTDVANSSSNSK[1371.77]R.L	4YM7_1_RPA1	1	RPA1	LQTDVANSSSNSKR	1363	1//9	11//46	3.25225	1.6875	R.K[1913.02]VYPSESR.Q	4YM7_2_RPA2	1	RPA2	KVYPSESR	120	126.127	40563.3	127.13	64980.4	43461.1	65990.3	1.51838	0.658598	-0.602529
				-141	39.6857	JL033021_040221_RPA2HFH_Q2_1to10_50B.06809.06809.5	NP	2.3985	0.0943103	0.447	//16	4//103	0.409	0.214286	R.LQTDVANSSSNSK[1230.66]R.L	4YM7_1_RPA1	1	RPA1	LQTDVANSSSNSKR	1363	//9	6//49	1.9895	1.0625	R.K[1771.91]VYPSESR.Q	4YM7_2_RPA2	1	RPA2	KVYPSESR	120	126.127	12351.6	127.131	77703.8	12762.9	82157.1	6.4372	0.155347	-2.68643
	2	RPA1:1363---RPA2:1061	7.39825
				-2	4.22595	JL033021_040221_RPA2HFH_Q2_1to5_50B.09300.09300.4	N	7.39825	0.244288		1//18	12//88	3.70625	0.933333	R.STGPVNSLTM[147.04]QPVK[1912.99]GR.K	4YM7_2_RPA2	1	RPA2	STGPVNSLTMQPVKGR	1061	//16	11//71	3.692	1.15385	R.LQTDVANSSSNSK[2094.12]R.L	4YM7_1_RPA1	1	RPA1	LQTDVANSSSNSKR	1363	126.127	22306.2	127.13	65255.3	23659.7	67923.9	2.87087	0.348326	-1.52149
				0	7.55805	JL033021_040221_RPA2HFH_Q2_1to5_50B.09323.09323.4	N	4.888	0.174416		1//18	12//88	2.8865	0.9	R.STGPVNSLTM[147.04]QPVK[1913.03]GR.K	4YM7_2_RPA2	1	RPA2	STGPVNSLTMQPVKGR	1061	//16	10//71	2.0015	0.769231	R.LQTDVANSSSNSK[2094.16]R.L	4YM7_1_RPA1	1	RPA1	LQTDVANSSSNSKR	1363	126.127	18815.6	127.13	61563.7	19904.2	64281.4	3.22953	0.309642	-1.69133
				-142	34.4565	JL033021_040221_RPA2HFH_Q2_1to10_50B.09326.09326.4	NP	1.87175	0.0644143	0.0958	//18	4//91	0.465	0.1875	R.STGPVNSLTM[147.04]QPVK[1771.91]GR.K	4YM7_2_RPA2	1	RPA2	STGPVNSLTMQPVKGR	1061	//16	5//76	1.40675	0.464286	R.LQTDVANSSSNSK[1953.04]R.L	4YM7_1_RPA1	1	RPA1	LQTDVANSSSNSKR	1363	126.127	11287.1	127.13	62453.2	11732.5	65910.4	5.61776	0.178007	-2.49
				-142	31.6711	JL033021_040221_RPA2HFH_Q2_1to10_50B.09313.09313.4	NP	0.8995	0.0334754	0.146	//18	5//91	0.319	0.15625	R.STGPVNSLTM[147.04]QPVK[1771.91]GR.K	4YM7_2_RPA2	1	RPA2	STGPVNSLTMQPVKGR	1061	//16	4//76	0.5805	0.214286	R.LQTDVANSSSNSK[1953.04]R.L	4YM7_1_RPA1	1	RPA1	LQTDVANSSSNSKR	1363	126.127	12481.9	127.13	69113.1	12974.1	72939.8	5.62197	0.177873	-2.49108
	3	RPA1:1363---RPA2:266	5.43875
				-141	32.253	JL033021_040221_RPA2HFH_Q2_5to1_50B.15297.15297.4	NP	5.43875	0.156673	3.51e-08	//16	5//76	1.18425	0.357143	R.LQTDVANSSSNSK[1827.06]R.L	4YM7_1_RPA1	1	RPA1	LQTDVANSSSNSKR	1363	1//14	15//78	4.2545	1.61538	R.K[1771.91]NEYLVPVVM[147.04]ILK.A	4YM7_2_RPA2	1	RPA2	KNEYLVPVVMILK	266	126.127	85707.5	127.131	22732.2	92762.3	16665.2	0.179655	5.56621	2.4767
				-1	1.31477	JL033021_040221_RPA2HFH_Q2_5to1_1ug.15346.15346.4	N	5.438	0.189676		//14	17//73	4.1855	1.65385	R.K[1913.01]NEYLVPVVM[147.04]ILK.A	4YM7_2_RPA2	1	RPA2	KNEYLVPVVMILK	266	//16	8//71	1.2525	0.576923	R.LQTDVANSSSNSK[1968.16]R.L	4YM7_1_RPA1	1	RPA1	LQTDVANSSSNSKR	1363	126.126	66420.6	127.13	17055.2	71892.4	12313.2	0.171273	5.83862	2.54563
				-141	31.4912	JL033021_040221_RPA2HFH_Q2_1to1_50B.15375.15375.4	NP	5.4075	0.157731	5.01e-11	//16	7//76	1.0115	0.428571	R.LQTDVANSSSNSK[1827.06]R.L	4YM7_1_RPA1	1	RPA1	LQTDVANSSSNSKR	1363	2//14	18//78	4.396	1.80769	R.K[1771.91]NEYLVPVVM[147.04]ILK.A	4YM7_2_RPA2	1	RPA2	KNEYLVPVVMILK	266	126.127	43714.2	127.131	42700	47059.4	41832.2	0.888924	1.12496	0.169868
				-141	31.4912	JL033021_040221_RPA2HFH_Q2_1to2_50B.14882.14882.4	NP	5.08075	0.148804	0.00167	//16	7//76	1.0525	0.5	R.LQTDVANSSSNSK[1827.06]R.L	4YM7_1_RPA1	1	RPA1	LQTDVANSSSNSKR	1363	1//14	15//78	4.02825	1.5	R.K[1771.91]NEYLVPVVM[147.04]ILK.A	4YM7_2_RPA2	1	RPA2	KNEYLVPVVMILK	266	126.127	80509.9	127.131	138779	86181.7	141485	1.64171	0.609121	-0.7152
				-141	34.0963	JL033021_040221_RPA2HFH_Q2_1to5_50B.15114.15114.5	P	4.824	0.169082	0.223	//16	5//96	0.9655	0.357143	R.LQTDVANSSSNSK[1827.06]R.L	4YM7_1_RPA1	1	RPA1	LQTDVANSSSNSKR	1363	//14	14//99	3.8585	1.5	R.K[1771.91]NEYLVPVVM[147.04]ILK.A	4YM7_2_RPA2	1	RPA2	KNEYLVPVVMILK	266	126.127	33772	127.13	132701	35545.3	139169	3.91524	0.255412	-1.9691
				-141	36.5192	JL033021_040221_RPA2HFH_Q2_1to10_50B.15150.15150.4	NP	4.74225	0.138228	1.31e-05	//16	5//76	1.11175	0.357143	R.LQTDVANSSSNSK[1827.06]R.L	4YM7_1_RPA1	1	RPA1	LQTDVANSSSNSKR	1363	1//14	15//78	3.6305	1.5	R.K[1771.91]NEYLVPVVM[147.04]ILK.A	4YM7_2_RPA2	1	RPA2	KNEYLVPVVMILK	266	126.127	21352.1	127.131	148746	21945.9	157476	7.17565	0.13936	-2.84311
				-141	32.0013	JL033021_040221_RPA2HFH_Q2_2to1_50B.14750.14750.5	P	4.642	0.162016	2.43e-06	//16	5//96	0.93425	0.357143	R.LQTDVANSSSNSK[1827.06]R.L	4YM7_1_RPA1	1	RPA1	LQTDVANSSSNSKR	1363	//14	14//99	3.70775	1.5	R.K[1771.91]NEYLVPVVM[147.04]ILK.A	4YM7_2_RPA2	1	RPA2	KNEYLVPVVMILK	266	126.127	133273	127.13	68696.5	143971	61649.7	0.428208	2.33532	1.22362
				-141	34.0963	JL033021_040221_RPA2HFH_Q2_1to2_50B.14863.14863.5	P	4.6055	0.159349	0.0416	//16	5//96	0.85675	0.357143	R.LQTDVANSSSNSK[1827.06]R.L	4YM7_1_RPA1	1	RPA1	LQTDVANSSSNSKR	1363	//14	14//99	3.74875	1.5	R.K[1771.91]NEYLVPVVM[147.04]ILK.A	4YM7_2_RPA2	1	RPA2	KNEYLVPVVMILK	266	126.127	63616.2	127.13	107695	68113.9	109692	1.61043	0.620954	-0.687443
				-141	33.144	JL033021_040221_RPA2HFH_Q2_1to10_50B.15136.15136.5	P	4.42875	0.159886	0.00208	//16	6//96	0.89925	0.392857	R.LQTDVANSSSNSK[1827.06]R.L	4YM7_1_RPA1	1	RPA1	LQTDVANSSSNSKR	1363	//14	15//99	3.5295	1.53846	R.K[1771.91]NEYLVPVVM[147.04]ILK.A	4YM7_2_RPA2	1	RPA2	KNEYLVPVVMILK	266	126.127	17001.1	127.13	124010	17428.5	131361	7.5371	0.132677	-2.91401
				-141	35.0485	JL033021_040221_RPA2HFH_Q2_1to2_1ug.15470.15470.5	P	3.98725	0.150386	0.00307	//16	6//96	0.70525	0.392857	R.LQTDVANSSSNSK[1827.06]R.L	4YM7_1_RPA1	1	RPA1	LQTDVANSSSNSKR	1363	//14	14//99	3.282	1.5	R.K[1771.91]NEYLVPVVM[147.04]ILK.A	4YM7_2_RPA2	1	RPA2	KNEYLVPVVMILK	266	126.127	30744.3	127.131	52233.6	32916.4	53212.6	1.6166	0.618583	-0.692961
				-141	33.7154	JL033021_040221_RPA2HFH_Q2_1to1_50B.15414.15414.5	P	3.972	0.153843	3.79e-10	//16	5//96	0.75475	0.357143	R.LQTDVANSSSNSK[1827.06]R.L	4YM7_1_RPA1	1	RPA1	LQTDVANSSSNSKR	1363	//14	14//99	3.21725	1.5	R.K[1771.91]NEYLVPVVM[147.04]ILK.A	4YM7_2_RPA2	1	RPA2	KNEYLVPVVMILK	266	126.127	46660.4	127.131	50816.2	50188.5	50264.8	1.00152	0.998481	-0.0021936
				-141	34.382	JL033021_040221_RPA2HFH_Q2_1to5_1ug.15421.15421.5	P	3.92875	0.150732	0.000976	//16	6//96	0.72675	0.392857	R.LQTDVANSSSNSK[1827.06]R.L	4YM7_1_RPA1	1	RPA1	LQTDVANSSSNSKR	1363	//14	14//99	3.202	1.5	R.K[1771.91]NEYLVPVVM[147.04]ILK.A	4YM7_2_RPA2	1	RPA2	KNEYLVPVVMILK	266	126.127	16364.6	127.131	63380.8	17231.4	66448.6	3.85626	0.259319	-1.9472
				-141	28.6725	JL033021_040221_RPA2HFH_Q2_2to1_50B.14729.14729.4	NP	3.75	0.108253	0.000508	//16	5//76	0.9825	0.357143	R.LQTDVANSSSNSK[1827.06]R.L	4YM7_1_RPA1	1	RPA1	LQTDVANSSSNSKR	1363	//14	13//78	2.7675	1.34615	R.K[1771.91]NEYLVPVVM[147.04]ILK.A	4YM7_2_RPA2	1	RPA2	KNEYLVPVVMILK	266	126.127	124480	127.131	58947.5	134515	51992.1	0.386514	2.58723	1.37141
				-141	30.8585	JL033021_040221_RPA2HFH_Q2_10to1_1ug.15425.15425.5	P	3.69775	0.144944	0.00202	//16	5//96	0.64525	0.357143	R.LQTDVANSSSNSK[1827.06]R.L	4YM7_1_RPA1	1	RPA1	LQTDVANSSSNSKR	1363	//14	14//99	3.0525	1.5	R.K[1771.91]NEYLVPVVM[147.04]ILK.A	4YM7_2_RPA2	1	RPA2	KNEYLVPVVMILK	266	126.127	91010.8	127.131	18423.3	98548.6	11571.8	0.117422	8.51629	3.09023
				-141	28.6683	JL033021_040221_RPA2HFH_Q2_1to10_1ug.15477.15477.5	P	3.57975	0.137948	0.00481	//16	5//96	0.62625	0.357143	R.LQTDVANSSSNSK[1827.06]R.L	4YM7_1_RPA1	1	RPA1	LQTDVANSSSNSKR	1363	//14	14//99	2.9535	1.5	R.K[1771.91]NEYLVPVVM[147.04]ILK.A	4YM7_2_RPA2	1	RPA2	KNEYLVPVVMILK	266	126.128	9043.57	127.131	58433.8	9332.2	61804.7	6.62274	0.150995	-2.72743
				-141	30.8585	JL033021_040221_RPA2HFH_Q2_1to1_1ug.15332.15332.5	P	3.53225	0.139579	0.0164	//16	6//96	0.625	0.392857	R.LQTDVANSSSNSK[1827.06]R.L	4YM7_1_RPA1	1	RPA1	LQTDVANSSSNSKR	1363	//14	15//99	2.90725	1.53846	R.K[1771.91]NEYLVPVVM[147.04]ILK.A	4YM7_2_RPA2	1	RPA2	KNEYLVPVVMILK	266	126.127	43433.1	127.131	41823.7	46761.7	40918.4	0.875041	1.1428	0.192577
				-142	37.1286	JL033021_040221_RPA2HFH_Q2_1to5_1ug.15414.15414.4	NP	3.49175	0.120615	0.00122	//16	5//76	0.7215	0.357143	R.LQTDVANSSSNSK[1827.06]R.L	4YM7_1_RPA1	1	RPA1	LQTDVANSSSNSKR	1363	1//14	14//78	2.77025	1.38462	R.K[1771.91]NEYLVPVVM[147.04]ILK.A	4YM7_2_RPA2	1	RPA2	KNEYLVPVVMILK	266	126.127	14245.5	127.13	54909.4	15002.2	57561.1	3.83685	0.26063	-1.93992
				-141	35.7151	JL033021_040221_RPA2HFH_Q2_1to10_1ug.15500.15500.5	P	3.3905	0.129295	0.000135	//16	6//96	0.63925	0.392857	R.LQTDVANSSSNSK[1827.06]R.L	4YM7_1_RPA1	1	RPA1	LQTDVANSSSNSKR	1363	//14	13//99	2.75125	1.34615	R.K[1771.91]NEYLVPVVM[147.04]ILK.A	4YM7_2_RPA2	1	RPA2	KNEYLVPVVMILK	266	126.127	9797.78	127.13	64823.7	10098.2	68584.4	6.79177	0.147237	-2.76379
				-141	32.8583	JL033021_040221_RPA2HFH_Q2_5to1_50B.15288.15288.5	P	3.36125	0.134316	1.3e-07	//16	6//96	0.62925	0.392857	R.LQTDVANSSSNSK[1827.06]R.L	4YM7_1_RPA1	1	RPA1	LQTDVANSSSNSKR	1363	//14	13//99	2.732	1.34615	R.K[1771.91]NEYLVPVVM[147.04]ILK.A	4YM7_2_RPA2	1	RPA2	KNEYLVPVVMILK	266	126.128	77638	127.131	21976.5	84017.3	16579.8	0.197338	5.06743	2.34126
				-142	29.1635	JL033021_040221_RPA2HFH_Q2_1to10_50B.15116.15116.5	P	3.22575	0.102543	0.067	//16	7//96	0.73975	0.428571	R.LQTDVANSSSNSK[1827.06]R.L	4YM7_1_RPA1	1	RPA1	LQTDVANSSSNSKR	1363	//14	11//99	2.486	1	R.K[1771.91]NEYLVPVVM[147.04]ILK.A	4YM7_2_RPA2	1	RPA2	KNEYLVPVVMILK	266	126.127	13576.8	127.131	94457.5	13955.3	100000	7.16572	0.139553	-2.84111
				-141	31.906	JL033021_040221_RPA2HFH_Q2_10to1_50B.15543.15543.5	P	2.9935	0.122331	2.38e-08	//16	7//96	0.50825	0.428571	R.LQTDVANSSSNSK[1827.06]R.L	4YM7_1_RPA1	1	RPA1	LQTDVANSSSNSKR	1363	//14	13//99	2.48525	1.46154	R.K[1771.91]NEYLVPVVM[147.04]ILK.A	4YM7_2_RPA2	1	RPA2	KNEYLVPVVMILK	266	126.127	48116.9	127.13	10891.1	52092.7	7351.15	0.141117	7.08633	2.82504
				-141	36.5722	JL033021_040221_RPA2HFH_Q2_1to2_1ug.15446.15446.5	P	2.9495	0.11383	1.08e-05	//16	5//96	0.57	0.357143	R.LQTDVANSSSNSK[1827.06]R.L	4YM7_1_RPA1	1	RPA1	LQTDVANSSSNSKR	1363	//14	12//99	2.3795	1.03846	R.K[1771.91]NEYLVPVVM[147.04]ILK.A	4YM7_2_RPA2	1	RPA2	KNEYLVPVVMILK	266	126.127	23109	127.13	42896.4	24712.1	43892.5	1.77615	0.563015	-0.828756
				-142	26.9733	JL033021_040221_RPA2HFH_Q2_2to1_1ug.15426.15426.5	P	2.938	0.116543	0.00191	//16	7//96	0.5145	0.428571	R.LQTDVANSSSNSK[1827.06]R.L	4YM7_1_RPA1	1	RPA1	LQTDVANSSSNSKR	1363	//14	13//99	2.4235	1.34615	R.K[1771.91]NEYLVPVVM[147.04]ILK.A	4YM7_2_RPA2	1	RPA2	KNEYLVPVVMILK	266	126.127	56651.6	127.13	29676.6	61195.6	26715.2	0.436554	2.29067	1.19577
				-142	36.5954	JL033021_040221_RPA2HFH_Q2_1to5_50B.15077.15077.4	P	2.617	0.0763775	0.00352	//16	5//76	0.83525	0.357143	R.LQTDVANSSSNSK[1827.06]R.L	4YM7_1_RPA1	1	RPA1	LQTDVANSSSNSKR	1363	1//14	12//78	1.78175	0.961538	R.K[1771.91]NEYLVPVVM[147.04]ILK.A	4YM7_2_RPA2	1	RPA2	KNEYLVPVVMILK	266	126.127	33933.5	127.131	115823	35857.8	121068	3.37633	0.29618	-1.75546
				-142	34.0052	JL033021_040221_RPA2HFH_Q2_2to1_1ug.15452.15452.4	NP	2.59175	0.0898416	0.0057	//16	5//76	0.66825	0.357143	R.LQTDVANSSSNSK[1827.06]R.L	4YM7_1_RPA1	1	RPA1	LQTDVANSSSNSKR	1363	//14	12//78	1.9235	1.03846	R.K[1771.91]NEYLVPVVM[147.04]ILK.A	4YM7_2_RPA2	1	RPA2	KNEYLVPVVMILK	266	126.127	62901.6	127.131	29002.6	67979	25431.8	0.374113	2.67299	1.41845
				-142	32.3292	JL033021_040221_RPA2HFH_Q2_1to1_1ug.15322.15322.4	P	2.41075	0.0844499	0.0166	//16	4//76	0.61625	0.321429	R.LQTDVANSSSNSK[1827.06]R.L	4YM7_1_RPA1	1	RPA1	LQTDVANSSSNSKR	1363	1//14	13//78	1.7945	1.07692	R.K[1771.91]NEYLVPVVM[147.04]ILK.A	4YM7_2_RPA2	1	RPA2	KNEYLVPVVMILK	266	126.127	35347.3	127.13	37185.2	38030.6	36673.7	0.964322	1.037	0.0524138
				-141	27.8345	JL033021_040221_RPA2HFH_Q2_1to2_1ug.15451.15451.4	NP	2.36575	0.0831035	5.7e-05	//16	4//76	0.6785	0.321429	R.LQTDVANSSSNSK[1827.06]R.L	4YM7_1_RPA1	1	RPA1	LQTDVANSSSNSKR	1363	//14	10//78	1.68725	0.884615	R.K[1771.91]NEYLVPVVM[147.04]ILK.A	4YM7_2_RPA2	1	RPA2	KNEYLVPVVMILK	266	126.126	25197.7	127.129	41662.9	26987.2	42383.1	1.57049	0.636745	-0.651212
				-141	29.2819	JL033021_040221_RPA2HFH_Q2_1to1_1ug.15357.15357.4	P	2.2485	0.0798742	0.0101	//16	5//76	0.7135	0.357143	R.LQTDVANSSSNSK[1827.06]R.L	4YM7_1_RPA1	1	RPA1	LQTDVANSSSNSKR	1363	//14	11//78	1.535	0.730769	R.K[1771.91]NEYLVPVVM[147.04]ILK.A	4YM7_2_RPA2	1	RPA2	KNEYLVPVVMILK	266	126.127	39133	127.13	36497.7	42141.7	35597.2	0.844702	1.18385	0.243485
				-141	30.7633	JL033021_040221_RPA2HFH_Q2_1to1_50B.15471.15471.5	P	2.21625	0.0745911	0.0121	//16	4//96	0.491	0.321429	R.LQTDVANSSSNSK[1827.06]R.L	4YM7_1_RPA1	1	RPA1	LQTDVANSSSNSKR	1363	//14	11//99	1.72525	1	R.K[1771.91]NEYLVPVVM[147.04]ILK.A	4YM7_2_RPA2	1	RPA2	KNEYLVPVVMILK	266	126.127	22488	127.13	23156.4	24199.2	22795.1	0.941976	1.0616	0.0862371
				-142	32.7101	JL033021_040221_RPA2HFH_Q2_1to2_1ug.15516.15516.4	NP	2.1855	0.0710685	0.0427	//16	6//76	0.78375	0.5	R.LQTDVANSSSNSK[1827.06]R.L	4YM7_1_RPA1	1	RPA1	LQTDVANSSSNSKR	1363	//14	9//78	1.40175	0.692308	R.K[1771.91]NEYLVPVVM[147.04]ILK.A	4YM7_2_RPA2	1	RPA2	KNEYLVPVVMILK	266	126.126	24174.7	127.13	36529.5	25919.6	36974.1	1.42649	0.701021	-0.512471
				-141	30.0437	JL033021_040221_RPA2HFH_Q2_10to1_50B.15502.15502.4	NP	2.131	0.0761071	3.17e-06	//16	5//76	0.728	0.357143	R.LQTDVANSSSNSK[1827.06]R.L	4YM7_1_RPA1	1	RPA1	LQTDVANSSSNSKR	1363	//14	11//78	1.403	0.923077	R.K[1771.91]NEYLVPVVM[147.04]ILK.A	4YM7_2_RPA2	1	RPA2	KNEYLVPVVMILK	266	126.127	36294.7	127.13	6006.57	39311.7	3178.25	0.0808475	12.369	3.62865
				-142	38.4237	JL033021_040221_RPA2HFH_Q2_1to10_1ug.15472.15472.4	NP	2.05	0.0702079	0.0237	1//16	6//76	0.65025	0.392857	R.LQTDVANSSSNSK[1827.06]R.L	4YM7_1_RPA1	1	RPA1	LQTDVANSSSNSKR	1363	1//14	9//78	1.39975	0.769231	R.K[1771.91]NEYLVPVVM[147.04]ILK.A	4YM7_2_RPA2	1	RPA2	KNEYLVPVVMILK	266	126.127	7144.4	127.13	51683.7	7327.51	54742	7.47074	0.133855	-2.90125
				-141	27.6059	JL033021_040221_RPA2HFH_Q2_10to1_1ug.15417.15417.4	NP	1.9525	0.0682132	0.00337	//16	5//76	0.56575	0.357143	R.LQTDVANSSSNSK[1827.06]R.L	4YM7_1_RPA1	1	RPA1	LQTDVANSSSNSKR	1363	1//14	11//78	1.38675	0.923077	R.K[1771.91]NEYLVPVVM[147.04]ILK.A	4YM7_2_RPA2	1	RPA2	KNEYLVPVVMILK	266	126.127	79466.8	127.131	14795.4	86059	8720.57	0.101332	9.86851	3.30283
				-141	28.1392	JL033021_040221_RPA2HFH_Q2_1to10_1ug.15483.15483.4	NP	1.7645	0.0639856	0.0941	1//16	4//76	0.4495	0.214286	R.LQTDVANSSSNSK[1827.06]R.L	4YM7_1_RPA1	1	RPA1	LQTDVANSSSNSKR	1363	1//14	11//78	1.315	0.923077	R.K[1771.91]NEYLVPVVM[147.04]ILK.A	4YM7_2_RPA2	1	RPA2	KNEYLVPVVMILK	266	126.127	7173.76	127.13	51452.8	7361.23	54491.9	7.40255	0.135089	-2.88802
	4	RPA1:469---RPA2:1061	0.60225
				-142	36.4848	JL033021_040221_RPA2HFH_Q2_10to1_50B.07214.07214.4	P	0.60225	0.0231434	0.056	//18	3//98	0.14125	0.09375	R.STGPVNSLTM[147.04]QPVK[1028.51]GR.K	4YM7_2_RPA2	1	RPA2	STGPVNSLTMQPVKGR	1061	//7	4//29	0.461	1	R.K[1953.04]HM[147.04]M[147.04]GK.R	4YM7_1_RPA1	1	RPA1	KHMMGK	469	126.127	33145.7	127.13	5466.5	35901.1	2882.21	0.0802821	12.4561	3.63878
	5	RPA1:1335---RPA2:930	8.6945
				-438	63.8181	JL033021_040221_RPA2HFH_Q2_5to1_100B.19691.19691.6	P	8.6945	0.246586	0.133	//16	24//246	8.6945	1.08929	R.K[1038.64]WPTIDM[147.04]PFSETGIQPDIIINPHAFPSR.M	4YM7_2_RPA2	1	RPA2	KWPTIDMPFSETGIQPDIIINPHAFPSR	930	//8	//32	0	0	K.EIKK[3488.78]QK.R	4YM7_1_RPA1	1	RPA1	EIKKQK	1335	126.127	48067.6	127.13	10894.6	52039.2	7359.25	0.141417	7.07127	2.82197
				-438	58.7119	JL033021_040221_RPA2HFH_Q2_5to1_100B.19699.19699.5	P	8.58325	0.212032	0.262	//16	29//246	8.58	1.32143	R.K[1038.64]WPTIDM[147.04]PFSETGIQPDIIINPHAFPSR.M	4YM7_2_RPA2	1	RPA2	KWPTIDMPFSETGIQPDIIINPHAFPSR	930	//8	1//32	0.00325	0.0833333	K.EIKK[3488.78]QK.R	4YM7_1_RPA1	1	RPA1	EIKKQK	1335	126.127	50653.4	127.13	12433.2	54830.9	8775.87	0.160053	6.24792	2.64338
	6	RPA1:1012---RPA2:513	5.86575
				-1	3.51351	JL033021_040221_RPA2HFH_Q2_5to1_1ug.16185.16185.4	N	5.86575	0.184876		1//15	12//66	2.4545	1.16667	R.GSFFAQLK[1695.95]TTTVR.K	4YM7_2_RPA2	1	RPA2	GSFFAQLKTTTVR	513	//14	9//55	3.41125	1.13636	R.EGLIDTAVK[1862.04]TSR.S	4YM7_1_RPA1	1	RPA1	EGLIDTAVKTSR	1012	126.127	65020.1	127.13	17777.8	70367.8	13213.3	0.187775	5.32553	2.41293
				-1	0.122277	JL033021_040221_RPA2HFH_Q2_1to1_1ug.16147.16147.4	N	5.76425	0.167804		//15	11//66	2.496	1.08333	R.GSFFAQLK[1695.96]TTTVR.K	4YM7_2_RPA2	1	RPA2	GSFFAQLKTTTVR	513	//14	10//55	3.26825	1.13636	R.EGLIDTAVK[1862.05]TSR.S	4YM7_1_RPA1	1	RPA1	EGLIDTAVKTSR	1012	126.127	37453.2	127.13	34335.8	40337.6	33431.3	0.828788	1.20658	0.270924
				-141	36.1658	JL033021_040221_RPA2HFH_Q2_2to1_50B.15612.15612.4	NP	2.756	0.0815843	0.0401	//15	11//71	2.11325	1.03846	R.GSFFAQLK[1554.86]TTTVR.K	4YM7_2_RPA2	1	RPA2	GSFFAQLKTTTVR	513	//14	6//63	0.64275	0.458333	R.EGLIDTAVK[1720.95]TSR.S	4YM7_1_RPA1	1	RPA1	EGLIDTAVKTSR	1012	126.127	116188	127.13	54080.1	125563	47520.7	0.378461	2.64228	1.40178
				-142	41.4141	JL033021_040221_RPA2HFH_Q2_10to1_1ug.16203.16203.5	P	2.39325	0.0867277	0.489	//15	8//93	1.8965	0.692308	R.GSFFAQLK[1554.86]TTTVR.K	4YM7_2_RPA2	1	RPA2	GSFFAQLKTTTVR	513	//14	5//81	0.49675	0.416667	R.EGLIDTAVK[1720.95]TSR.S	4YM7_1_RPA1	1	RPA1	EGLIDTAVKTSR	1012	126.127	64892.3	127.13	12988.5	70268	8092.72	0.115169	8.68288	3.11817
				-142	33.1157	JL033021_040221_RPA2HFH_Q2_2to1_1ug.16233.16233.4	P	1.9115	0.0576874	0.153	//15	9//71	1.7195	0.846154	R.GSFFAQLK[1554.86]TTTVR.K	4YM7_2_RPA2	1	RPA2	GSFFAQLKTTTVR	513	//14	3//63	0.192	0.125	R.EGLIDTAVK[1720.95]TSR.S	4YM7_1_RPA1	1	RPA1	EGLIDTAVKTSR	1012	126.127	52327.7	127.13	25543.7	56540	22674.6	0.401036	2.49354	1.3182
				-141	32.692	JL033021_040221_RPA2HFH_Q2_2to1_50B.15659.15659.4	P	1.862	0.0539085	0.000102	//15	10//71	1.10625	0.884615	R.GSFFAQLK[1554.86]TTTVR.K	4YM7_2_RPA2	1	RPA2	GSFFAQLKTTTVR	513	//14	7//63	0.75575	0.708333	R.EGLIDTAVK[1720.95]TSR.S	4YM7_1_RPA1	1	RPA1	EGLIDTAVKTSR	1012	126.127	111390	127.13	57244.8	120333	51342.6	0.42667	2.34373	1.22881
				-141	37.5803	JL033021_040221_RPA2HFH_Q2_1to10_50B.16053.16053.5	P	1.6915	0.0642911	0.438	//15	6//93	1.2875	0.5	R.GSFFAQLK[1554.86]TTTVR.K	4YM7_2_RPA2	1	RPA2	GSFFAQLKTTTVR	513	//14	5//81	0.404	0.291667	R.EGLIDTAVK[1720.95]TSR.S	4YM7_1_RPA1	1	RPA1	EGLIDTAVKTSR	1012	126.127	6548.86	127.13	42790.9	6753.99	45266.1	6.70212	0.149207	-2.74462
				-140	31.6753	JL033021_040221_RPA2HFH_Q2_1to2_50B.15717.15717.4	P	0.97575	0.0292368	0.000508	//15	6//71	0.454	0.423077	R.GSFFAQLK[1554.86]TTTVR.K	4YM7_2_RPA2	1	RPA2	GSFFAQLKTTTVR	513	//14	5//63	0.52175	0.416667	R.EGLIDTAVK[1720.95]TSR.S	4YM7_1_RPA1	1	RPA1	EGLIDTAVKTSR	1012	126.126	42727.4	127.129	69771.8	45769.1	70930.4	1.54974	0.645268	-0.632029
	7	RPA1:1012---RPA2:1061	4.77925
				-1	1.94443	JL033021_040221_RPA2HFH_Q2_10to1_1ug.12474.12474.4	N	4.77925	0.157166		//18	11//89	3.40725	0.933333	R.STGPVNSLTM[147.04]QPVK[1695.97]GR.K	4YM7_2_RPA2	1	RPA2	STGPVNSLTMQPVKGR	1061	//14	8//55	1.372	0.818182	R.EGLIDTAVK[2094.14]TSR.S	4YM7_1_RPA1	1	RPA1	EGLIDTAVKTSR	1012	126.127	81430.4	127.13	14982.2	88186.9	8744.38	0.0991574	10.085	3.33414
				0	2.23041	JL033021_040221_RPA2HFH_Q2_5to1_1ug.12480.12480.4	N	4.7765	0.164639		//18	12//89	3.23375	1.03333	R.STGPVNSLTM[147.04]QPVK[1695.97]GR.K	4YM7_2_RPA2	1	RPA2	STGPVNSLTMQPVKGR	1061	//14	8//55	1.54275	0.727273	R.EGLIDTAVK[2094.14]TSR.S	4YM7_1_RPA1	1	RPA1	EGLIDTAVKTSR	1012	126.127	65064.7	127.13	18173.4	70412.9	13633.3	0.193619	5.16478	2.36871
				-141	32.1669	JL033021_040221_RPA2HFH_Q2_1to10_50B.12354.12354.4	P	1.64725	0.051516	0.26	//18	10//94	1.262	0.59375	R.STGPVNSLTM[147.04]QPVK[1554.86]GR.K	4YM7_2_RPA2	1	RPA2	STGPVNSLTMQPVKGR	1061	//14	3//63	0.38525	0.125	R.EGLIDTAVK[1953.04]TSR.S	4YM7_1_RPA1	1	RPA1	EGLIDTAVKTSR	1012	126.127	21131	127.13	175642	21487.3	186318	8.67108	0.115326	-3.11621
				-141	33.77	JL033021_040221_RPA2HFH_Q2_1to2_1ug.12536.12536.5	P	1.0225	0.0357037	0.525	//18	6//121	0.29225	0.1875	R.STGPVNSLTM[147.04]QPVK[1554.86]GR.K	4YM7_2_RPA2	1	RPA2	STGPVNSLTMQPVKGR	1061	//14	7//81	0.73025	0.5	R.EGLIDTAVK[1953.04]TSR.S	4YM7_1_RPA1	1	RPA1	EGLIDTAVKTSR	1012	126.127	26537.1	127.131	46798.6	28398.1	47766.2	1.68202	0.594522	-0.750199
				-141	33.0839	JL033021_040221_RPA2HFH_Q2_2to1_1ug.12512.12512.5	P	0.984	0.0333588	0.292	//18	4//121	0.216	0.125	R.STGPVNSLTM[147.04]QPVK[1554.86]GR.K	4YM7_2_RPA2	1	RPA2	STGPVNSLTMQPVKGR	1061	//14	5//81	0.768	0.416667	R.EGLIDTAVK[1953.04]TSR.S	4YM7_1_RPA1	1	RPA1	EGLIDTAVKTSR	1012	126.127	63800.1	127.13	30410.7	68941.9	26860	0.389603	2.56671	1.35992
				-141	33.378	JL033021_040221_RPA2HFH_Q2_2to1_1ug.12507.12507.5	P	0.90375	0.0300694	0.131	//18	4//121	0.24525	0.125	R.STGPVNSLTM[147.04]QPVK[1554.86]GR.K	4YM7_2_RPA2	1	RPA2	STGPVNSLTMQPVKGR	1061	//14	5//81	0.6585	0.416667	R.EGLIDTAVK[1953.04]TSR.S	4YM7_1_RPA1	1	RPA1	EGLIDTAVKTSR	1012	126.127	61009.9	127.13	28689.2	65930.1	25265.8	0.383221	2.60946	1.38375
	8	RPA1:1012---RPA2:916	4.599
				0	0.465564	JL033021_040221_RPA2HFH_Q2_1to10_50B.12932.12932.4	N	4.599	0.158761		//14	10//55	3.229	1.27273	R.EGLIDTAVK[1641.89]TSR.S	4YM7_1_RPA1	1	RPA1	EGLIDTAVKTSR	1012	//13	9//50	1.37	0.95	R.TPQIGDK[1695.96]FSSR.H	4YM7_2_RPA2	1	RPA2	TPQIGDKFSSR	916	126.127	14014.9	127.13	95958.7	14418.3	101569	7.04448	0.141955	-2.81649
	9	RPA1:1012---RPA2:266	2.19875
				-141	37.9147	JL033021_040221_RPA2HFH_Q2_1to10_50B.17385.17385.5	P	2.19875	0.0856895	0.163	//14	11//101	2.11325	0.884615	R.K[1554.86]NEYLVPVVM[147.04]ILK.A	4YM7_2_RPA2	1	RPA2	KNEYLVPVVMILK	266	//14	2//81	0.0855	0.0833333	R.EGLIDTAVK[1827.06]TSR.S	4YM7_1_RPA1	1	RPA1	EGLIDTAVKTSR	1012	126.127	5980.88	127.13	35811.6	6194.81	37838.1	6.10804	0.163719	-2.61071
	10	RPA1:462---RPA2:32	8.54575
				-140	17.2077	JL033021_040221_RPA2HFH_Q2_10to1_1ug.21602.21602.5	P	8.54575	0.245046	0.378	//16	24//307	8.48425	0.875	K.DK[981.59]SAFPLLQEAVQPHIGSFNALTEGPDGGLLNLGVK.D	4YM7_2_RPA2	1	RPA2	DKSAFPLLQEAVQPHIGSFNALTEGPDGGLLNLGVK	32	//8	2//31	0.0615	0.166667	K.QALEK[3998.12]K.E	4YM7_1_RPA1	1	RPA1	QALEKK	462	126.127	73028.5	127.13	17659.8	79053.6	12368	0.15645	6.3918	2.67622
	11	RPA1:848---RPA2:1061	6.392
				0	2.46233	JL033021_040221_RPA2HFH_Q2_1to10_50B.11947.11947.5	N	6.392	0.283333		//18	12//114	2.87025	0.9	R.STGPVNSLTM[147.04]QPVK[1711.96]GR.K	4YM7_2_RPA2	1	RPA2	STGPVNSLTMQPVKGR	1061	1//14	14//69	3.52175	1.63636	R.TDILK[2094.14]TSVDTGR.E	4YM7_1_RPA1	1	RPA1	TDILKTSVDTGR	848	126.127	17350.8	127.13	108313	17935.5	114508	6.38447	0.15663	-2.67457
				-141	33.5841	JL033021_040221_RPA2HFH_Q2_2to1_1ug.12096.12096.5	P	3.84875	0.161498	0.303	//18	4//121	0.294	0.1875	R.STGPVNSLTM[147.04]QPVK[1570.86]GR.K	4YM7_2_RPA2	1	RPA2	STGPVNSLTMQPVKGR	1061	//14	10//79	3.55475	1.20833	R.TDILK[1953.04]TSVDTGR.E	4YM7_1_RPA1	1	RPA1	TDILKTSVDTGR	848	126.127	60960.9	127.13	28791.2	65876	25379.5	0.385261	2.59564	1.37609
	12	RPA1:474---RPA2:106	7.53725
				-144	29.0827	JL033021_040221_RPA2HFH_Q2_1to10_50B.12688.12688.5	P	7.53725	0.211953	0.38	//11	25//191	7.46675	1.48	K.LSVSVEQVSIAK[1842.97]PM[147.04]SNDGVSSAVER.K	4YM7_2_RPA2	1	RPA2	LSVSVEQVSIAKPMSNDGVSSAVER	106	//15	2//96	0.0705	0.0769231	R.KHMM[147.04]GK[2870.47]RVNYAAR.S	4YM7_1_RPA1	1	RPA1	KHMMGKRVNYAAR	474	126.127	13058.7	127.13	91784	13415.2	97181.7	7.24414	0.138043	-2.85681
	13	RPA1:450---RPA2:266	4.34675
				-141	35.9801	JL033021_040221_RPA2HFH_Q2_1to10_50B.16816.16816.4	NP	4.34675	0.152397	0.000237	//14	14//82	3.2755	1.57692	R.K[1347.81]NEYLVPVVM[147.04]ILK.A	4YM7_2_RPA2	1	RPA2	KNEYLVPVVMILK	266	1//13	7//52	1.07125	0.772727	R.TSGK[1827.06]VPIPGVK.Q	4YM7_1_RPA1	1	RPA1	TSGKVPIPGVK	450	126.127	10983.2	127.13	71665	11328.1	75808.9	6.69212	0.149429	-2.74246
				-141	39.2288	JL033021_040221_RPA2HFH_Q2_5to1_50B.16904.16904.4	NP	4.11725	0.138803	6.51e-06	1//14	14//82	3.14875	1.5	R.K[1347.81]NEYLVPVVM[147.04]ILK.A	4YM7_2_RPA2	1	RPA2	KNEYLVPVVMILK	266	1//13	7//52	0.9685	0.772727	R.TSGK[1827.06]VPIPGVK.Q	4YM7_1_RPA1	1	RPA1	TSGKVPIPGVK	450	126.127	54713.5	127.13	13268.6	59227.2	9306.56	0.157133	6.36402	2.66994
				-141	36.3313	JL033021_040221_RPA2HFH_Q2_1to2_50B.16516.16516.4	P	4.00425	0.138416	0.000267	//14	14//82	3.3125	1.57692	R.K[1347.81]NEYLVPVVM[147.04]ILK.A	4YM7_2_RPA2	1	RPA2	KNEYLVPVVMILK	266	//13	5//52	0.69175	0.409091	R.TSGK[1827.06]VPIPGVK.Q	4YM7_1_RPA1	1	RPA1	TSGKVPIPGVK	450	126.127	37509.8	127.13	51437.1	40259.9	51751.7	1.28544	0.777944	-0.362262
				-141	39.2679	JL033021_040221_RPA2HFH_Q2_5to1_50B.16870.16870.5	P	3.77925	0.135239	1.81e-11	//14	17//103	3.4395	1.69231	R.K[1347.81]NEYLVPVVM[147.04]ILK.A	4YM7_2_RPA2	1	RPA2	KNEYLVPVVMILK	266	//13	3//65	0.33975	0.136364	R.TSGK[1827.06]VPIPGVK.Q	4YM7_1_RPA1	1	RPA1	TSGKVPIPGVK	450	126.127	47851.8	127.131	13838.6	51781.2	10533.4	0.203422	4.91589	2.29745
				-141	36.1557	JL033021_040221_RPA2HFH_Q2_1to1_50B.16960.16960.4	P	3.5915	0.134116	2.97e-06	//14	12//82	2.8665	1.15385	R.K[1347.81]NEYLVPVVM[147.04]ILK.A	4YM7_2_RPA2	1	RPA2	KNEYLVPVVMILK	266	//13	5//52	0.725	0.409091	R.TSGK[1827.06]VPIPGVK.Q	4YM7_1_RPA1	1	RPA1	TSGKVPIPGVK	450	126.127	20434.8	127.13	21497.4	21986	21201.7	0.964327	1.03699	0.0524057
				-141	36.0679	JL033021_040221_RPA2HFH_Q2_1to5_50B.16711.16711.4	P	2.971	0.101515	0.0564	//14	13//82	2.38625	1.26923	R.K[1347.81]NEYLVPVVM[147.04]ILK.A	4YM7_2_RPA2	1	RPA2	KNEYLVPVVMILK	266	//13	4//52	0.58475	0.272727	R.TSGK[1827.06]VPIPGVK.Q	4YM7_1_RPA1	1	RPA1	TSGKVPIPGVK	450	126.127	18318.7	127.131	65647.1	19332.1	68701.7	3.55377	0.281392	-1.82935
				-141	31.5901	JL033021_040221_RPA2HFH_Q2_2to1_50B.16479.16479.4	P	2.607	0.0883399	0.0631	//14	13//82	2.2315	1.26923	R.K[1347.81]NEYLVPVVM[147.04]ILK.A	4YM7_2_RPA2	1	RPA2	KNEYLVPVVMILK	266	//13	3//52	0.3755	0.136364	R.TSGK[1827.06]VPIPGVK.Q	4YM7_1_RPA1	1	RPA1	TSGKVPIPGVK	450	126.127	89779.7	127.13	40337.1	97035.3	35164.7	0.362391	2.75945	1.46438
				-141	40.1946	JL033021_040221_RPA2HFH_Q2_10to1_50B.17116.17116.4	P	2.57225	0.0857931	0.000207	//14	11//82	1.95475	0.846154	R.K[1347.81]NEYLVPVVM[147.04]ILK.A	4YM7_2_RPA2	1	RPA2	KNEYLVPVVMILK	266	//13	4//52	0.6175	0.272727	R.TSGK[1827.06]VPIPGVK.Q	4YM7_1_RPA1	1	RPA1	TSGKVPIPGVK	450	126.127	34800.5	127.13	4814.34	37700.9	2034.82	0.0539728	18.5279	4.21162
				591	-120.718	JL033021_040221_RPA2HFH_Q2_1to1_50B.16942.16942.3	P	1.7935	0.0675454	2.08e-05	//14	9//61	1.401	0.692308	R.K[1347.81]NEYLVPVVM[147.04]ILK.A	4YM7_2_RPA2	1	RPA2	KNEYLVPVVMILK	266	1//13	5//39	0.3925	0.318182	R.TSGK[1827.06]VPIPGVK.Q	4YM7_1_RPA1	1	RPA1	TSGKVPIPGVK	450	126.127	25411.6	127.131	23438	27367.4	22834.4	0.834366	1.19851	0.261247
	14	RPA1:442---RPA2:1061	4.06525
				-142	21.648	JL033021_040221_RPA2HFH_Q2_1to10_50B.21990.21990.5	P	4.06525	0.114359	0.0322	//13	12//193	3.973	0.604167	R.LM[147.04]NAFVTIQNDVNAFIDSTK[1953.04]AQGR.T	4YM7_1_RPA1	1	RPA1	LMNAFVTIQNDVNAFIDSTKAQGR	442	//18	3//118	0.09225	0.09375	R.STGPVNSLTM[147.04]QPVK[2934.49]GR.K	4YM7_2_RPA2	1	RPA2	STGPVNSLTMQPVKGR	1061	126.127	3442.48	127.13	29070	3496.82	30841.8	8.81997	0.113379	-3.14077
				-143	22.2729	JL033021_040221_RPA2HFH_Q2_1to10_50B.21969.21969.5	P	3.38525	0.102388	0.0156	//13	13//193	3.159	0.541667	R.LM[147.04]NAFVTIQNDVNAFIDSTK[1953.04]AQGR.T	4YM7_1_RPA1	1	RPA1	LMNAFVTIQNDVNAFIDSTKAQGR	442	//18	4//118	0.22625	0.1875	R.STGPVNSLTM[147.04]QPVK[2934.49]GR.K	4YM7_2_RPA2	1	RPA2	STGPVNSLTMQPVKGR	1061	126.127	4365.04	127.13	28026.8	4505.8	29641.1	6.57844	0.152012	-2.71775
	15	RPA1:111---RPA2:120	3.388
				-141	52.6105	JL033021_040221_RPA2HFH_Q2_10to1_100B.06971.06971.4	NP	3.388	0.171753	0.0762	//8	6//40	1.89	1.25	R.LK[1230.66]SVEVHR.Y	4YM7_1_RPA1	1	RPA1	LKSVEVHR	111	//9	5//45	1.498	1	R.K[1232.72]VYPSESR.Q	4YM7_2_RPA2	1	RPA2	KVYPSESR	120	126.127	65420.9	127.13	10682.1	70860.1	5573.75	0.0786585	12.7132	3.66825
				-141	49.6607	JL033021_040221_RPA2HFH_Q2_5to1_100B.06971.06971.4	NP	2.808	0.141343	0.00181	//8	6//40	1.4765	1.25	R.LK[1230.66]SVEVHR.Y	4YM7_1_RPA1	1	RPA1	LKSVEVHR	111	//9	5//45	1.3315	0.75	R.K[1232.72]VYPSESR.Q	4YM7_2_RPA2	1	RPA2	KVYPSESR	120	126.127	52841.3	127.13	11692	57209.7	7785.21	0.136082	7.34851	2.87745
				-141	56.6223	JL033021_040221_RPA2HFH_Q2_2to1_100B.07029.07029.4	NP	2.031	0.105282	0.00802	//8	5//40	0.9825	0.8125	R.LK[1230.66]SVEVHR.Y	4YM7_1_RPA1	1	RPA1	LKSVEVHR	111	//9	4//45	1.0485	0.5	R.K[1232.72]VYPSESR.Q	4YM7_2_RPA2	1	RPA2	KVYPSESR	120	126.127	51644.5	127.13	22960.5	55820.1	19967.8	0.357716	2.79551	1.48311
	16	RPA1:555---RPA2:1061	9.15275
				-141	22.8991	JL033021_040221_RPA2HFH_Q2_1to1_50B.12595.12595.5	NP	9.15275	0.225704	6.31e-09	//18	22//173	7.8405	1.45238	R.K[1953.04]ALANQLLTPSSNVSTHTLNK.K	4YM7_1_RPA1	1	RPA1	KALANQLLTPSSNVSTHTLNK	555	//18	9//118	1.31225	0.59375	R.STGPVNSLTM[147.04]QPVK[2502.38]GR.K	4YM7_2_RPA2	1	RPA2	STGPVNSLTMQPVKGR	1061	126.126	29832.7	127.13	27653.6	32127.8	26954.9	0.838991	1.19191	0.253273
				-141	28.3095	JL033021_040221_RPA2HFH_Q2_10to1_50B.12664.12664.5	P	5.32625	0.194095	0.0412	//18	17//173	4.95625	1.16667	R.K[1953.04]ALANQLLTPSSNVSTHTLNK.K	4YM7_1_RPA1	1	RPA1	KALANQLLTPSSNVSTHTLNK	555	//18	6//118	0.37	0.25	R.STGPVNSLTM[147.04]QPVK[2502.38]GR.K	4YM7_2_RPA2	1	RPA2	STGPVNSLTMQPVKGR	1061	126.127	31819.7	127.13	4513.64	34470.8	1980.19	0.0574455	17.4078	4.12166
	17	RPA1:555---RPA2:333	3.57875
				-143	35.1829	JL033021_040221_RPA2HFH_Q2_1to1_50B.16643.16643.5	NP	3.57875	0.130793	0.302	//18	12//176	2.77275	0.642857	R.K[1732.95]ALANQLLTPSSNVSTHTLNK.K	4YM7_1_RPA1	1	RPA1	KALANQLLTPSSNVSTHTLNK	555	//14	6//83	0.806	0.458333	R.TQVLQYLGDK[2502.38]FR.V	4YM7_2_RPA2	1	RPA2	TQVLQYLGDKFR	333	126.127	19078.2	127.13	16944.6	20551.9	16444.8	0.80016	1.24975	0.321639
	18	RPA1:612---RPA2:930	13.7197
				-142	27.1952	JL033021_040221_RPA2HFH_Q2_5to1_100B.19719.19719.5	P	13.7197	0.369964	0.271	//16	35//246	13.628	1.78571	R.K[1334.79]WPTIDM[147.04]PFSETGIQPDIIINPHAFPSR.M	4YM7_2_RPA2	1	RPA2	KWPTIDMPFSETGIQPDIIINPHAFPSR	930	//11	2//53	0.09175	0.111111	R.VLPNEK[3488.78]TLR.L	4YM7_1_RPA1	1	RPA1	VLPNEKTLR	612	126.127	68668.3	127.13	16928.9	74330.9	11976.1	0.161119	6.20659	2.6338
				-141	21.5317	JL033021_040221_RPA2HFH_Q2_1to2_100B.19568.19568.5	P	13.441	0.36124	0.00311	//16	36//246	13.2315	1.80357	R.K[1334.79]WPTIDM[147.04]PFSETGIQPDIIINPHAFPSR.M	4YM7_2_RPA2	1	RPA2	KWPTIDMPFSETGIQPDIIINPHAFPSR	930	//11	3//53	0.2095	0.277778	R.VLPNEK[3488.78]TLR.L	4YM7_1_RPA1	1	RPA1	VLPNEKTLR	612	126.127	30757	127.13	50251.3	32946.3	51087.3	1.55062	0.644902	-0.632848
				-142	19.823	JL033021_040221_RPA2HFH_Q2_1to1_100B.19837.19837.5	P	13.3763	0.373544	1.11e-06	//16	35//246	13.2745	1.82143	R.K[1334.79]WPTIDM[147.04]PFSETGIQPDIIINPHAFPSR.M	4YM7_2_RPA2	1	RPA2	KWPTIDMPFSETGIQPDIIINPHAFPSR	930	//11	2//53	0.10175	0.111111	R.VLPNEK[3488.78]TLR.L	4YM7_1_RPA1	1	RPA1	VLPNEKTLR	612	126.127	30945.1	127.13	31041.8	33306.5	30485.8	0.91531	1.09253	0.127667
				-141	26.8339	JL033021_040221_RPA2HFH_Q2_5to1_100B.19728.19728.6	P	12.6155	0.385571	0.000348	//16	28//246	12.4855	1.51786	R.K[1334.79]WPTIDM[147.04]PFSETGIQPDIIINPHAFPSR.M	4YM7_2_RPA2	1	RPA2	KWPTIDMPFSETGIQPDIIINPHAFPSR	930	//11	3//53	0.13	0.166667	R.VLPNEK[3488.78]TLR.L	4YM7_1_RPA1	1	RPA1	VLPNEKTLR	612	126.127	87326.4	127.13	20721.5	94534.3	14365.3	0.151958	6.58075	2.71825
				-142	28.5043	JL033021_040221_RPA2HFH_Q2_1to10_100B.19540.19540.5	P	12.5375	0.320681	0.00514	//16	33//246	12.4352	1.69643	R.K[1334.79]WPTIDM[147.04]PFSETGIQPDIIINPHAFPSR.M	4YM7_2_RPA2	1	RPA2	KWPTIDMPFSETGIQPDIIINPHAFPSR	930	//11	2//53	0.10225	0.111111	R.VLPNEK[3488.78]TLR.L	4YM7_1_RPA1	1	RPA1	VLPNEKTLR	612	126.127	8380.64	127.13	56152.8	8631.83	59419.9	6.88382	0.145268	-2.78321
				-141	18.8967	JL033021_040221_RPA2HFH_Q2_1to2_100B.19544.19544.6	P	12.469	0.374957	0.000518	//16	26//246	12.3332	1.44643	R.K[1334.79]WPTIDM[147.04]PFSETGIQPDIIINPHAFPSR.M	4YM7_2_RPA2	1	RPA2	KWPTIDMPFSETGIQPDIIINPHAFPSR	930	//11	3//53	0.13575	0.166667	R.VLPNEK[3488.78]TLR.L	4YM7_1_RPA1	1	RPA1	VLPNEKTLR	612	126.127	41968.9	127.13	69869	44945.7	71102.7	1.58197	0.632124	-0.661722
				-141	26.0071	JL033021_040221_RPA2HFH_Q2_1to10_100B.19543.19543.6	P	12.4298	0.391125	0.00018	//16	26//246	12.3458	1.44643	R.K[1334.79]WPTIDM[147.04]PFSETGIQPDIIINPHAFPSR.M	4YM7_2_RPA2	1	RPA2	KWPTIDMPFSETGIQPDIIINPHAFPSR	930	//11	2//53	0.084	0.111111	R.VLPNEK[3488.78]TLR.L	4YM7_1_RPA1	1	RPA1	VLPNEKTLR	612	126.127	11005.4	127.13	67191.7	11388.5	71013.4	6.23555	0.160371	-2.64052
				-141	26.2552	JL033021_040221_RPA2HFH_Q2_1to1_1ug.18192.18192.6	P	12.109	0.314965	0.00105	//16	27//246	11.9477	1.5	R.K[1334.79]WPTIDM[147.04]PFSETGIQPDIIINPHAFPSR.M	4YM7_2_RPA2	1	RPA2	KWPTIDMPFSETGIQPDIIINPHAFPSR	930	//11	3//53	0.16125	0.166667	R.VLPNEK[3488.78]TLR.L	4YM7_1_RPA1	1	RPA1	VLPNEKTLR	612	126.128	56346.4	127.131	57294.4	60639.9	56337.3	0.929046	1.07637	0.106179
				-141	22.3693	JL033021_040221_RPA2HFH_Q2_1to5_100B.19663.19663.6	P	12.0847	0.363036	0.22	//16	27//246	12.0023	1.46429	R.K[1334.79]WPTIDM[147.04]PFSETGIQPDIIINPHAFPSR.M	4YM7_2_RPA2	1	RPA2	KWPTIDMPFSETGIQPDIIINPHAFPSR	930	//11	2//53	0.0825	0.111111	R.VLPNEK[3488.78]TLR.L	4YM7_1_RPA1	1	RPA1	VLPNEKTLR	612	126.127	14427.1	127.13	55097	15197.6	57745.7	3.79966	0.263181	-1.92587
				-144	25.7759	JL033021_040221_RPA2HFH_Q2_1to1_100B.19880.19880.5	P	11.7137	0.319224	0.000104	1//16	34//246	11.4998	1.5	R.K[1334.79]WPTIDM[147.04]PFSETGIQPDIIINPHAFPSR.M	4YM7_2_RPA2	1	RPA2	KWPTIDMPFSETGIQPDIIINPHAFPSR	930	//11	2//53	0.214	0.222222	R.VLPNEK[3488.78]TLR.L	4YM7_1_RPA1	1	RPA1	VLPNEKTLR	612	126.127	24916	127.13	21665.7	26844.5	20979.7	0.78153	1.27954	0.355627
				-142	26.1174	JL033021_040221_RPA2HFH_Q2_1to1_100B.19806.19806.6	P	11.49	0.32942	3.78e-05	//16	26//246	11.3727	1.44643	R.K[1334.79]WPTIDM[147.04]PFSETGIQPDIIINPHAFPSR.M	4YM7_2_RPA2	1	RPA2	KWPTIDMPFSETGIQPDIIINPHAFPSR	930	//11	3//53	0.11725	0.166667	R.VLPNEK[3488.78]TLR.L	4YM7_1_RPA1	1	RPA1	VLPNEKTLR	612	126.127	33999.3	127.13	32419.4	36607.5	31687.9	0.865611	1.15525	0.208209
				-141	24.2709	JL033021_040221_RPA2HFH_Q2_1to1_100B.19809.19809.6	P	11.375	0.330702	7.06e-06	//16	25//246	11.2647	1.32143	R.K[1334.79]WPTIDM[147.04]PFSETGIQPDIIINPHAFPSR.M	4YM7_2_RPA2	1	RPA2	KWPTIDMPFSETGIQPDIIINPHAFPSR	930	//11	3//53	0.11025	0.166667	R.VLPNEK[3488.78]TLR.L	4YM7_1_RPA1	1	RPA1	VLPNEKTLR	612	126.127	35715.3	127.13	32183.5	38470.4	31281	0.813117	1.22983	0.298464
				-144	26.1893	JL033021_040221_RPA2HFH_Q2_1to10_100B.19529.19529.5	P	11.0715	0.303113	0.00749	//16	37//246	11.0045	1.625	R.K[1334.79]WPTIDM[147.04]PFSETGIQPDIIINPHAFPSR.M	4YM7_2_RPA2	1	RPA2	KWPTIDMPFSETGIQPDIIINPHAFPSR	930	//11	2//53	0.067	0.111111	R.VLPNEK[3488.78]TLR.L	4YM7_1_RPA1	1	RPA1	VLPNEKTLR	612	126.127	9327.3	127.13	54779.8	9669.62	57863.6	5.98407	0.16711	-2.58113
				-142	21.1321	JL033021_040221_RPA2HFH_Q2_1to1_100B.19828.19828.5	P	9.96425	0.263027	0.000156	//16	31//246	9.872	1.33929	R.K[1334.79]WPTIDM[147.04]PFSETGIQPDIIINPHAFPSR.M	4YM7_2_RPA2	1	RPA2	KWPTIDMPFSETGIQPDIIINPHAFPSR	930	//11	2//53	0.09225	0.111111	R.VLPNEK[3488.78]TLR.L	4YM7_1_RPA1	1	RPA1	VLPNEKTLR	612	126.127	31144.5	127.13	25574	33567.2	24608.7	0.733118	1.36404	0.447883
				-142	24.5465	JL033021_040221_RPA2HFH_Q2_1to10_100B.19506.19506.6	P	9.29	0.286485	0.0598	//16	24//246	9.20275	1.125	R.K[1334.79]WPTIDM[147.04]PFSETGIQPDIIINPHAFPSR.M	4YM7_2_RPA2	1	RPA2	KWPTIDMPFSETGIQPDIIINPHAFPSR	930	//11	2//53	0.08725	0.111111	R.VLPNEK[3488.78]TLR.L	4YM7_1_RPA1	1	RPA1	VLPNEKTLR	612	126.127	8491.87	127.13	59033.7	8729.02	62497.1	7.15969	0.139671	-2.8399
	19	RPA1:612---RPA2:1061	0.48575
				-141	35.7794	JL033021_040221_RPA2HFH_Q2_10to1_50B.11202.11202.4	P	0.48575	0.0154138	0.187	//18	5//95	0.29475	0.28125	R.STGPVNSLTM[147.04]QPVK[1334.79]GR.K	4YM7_2_RPA2	1	RPA2	STGPVNSLTMQPVKGR	1061	//11	3//43	0.191	0.166667	R.VLPNEK[1953.04]TLR.L	4YM7_1_RPA1	1	RPA1	VLPNEKTLR	612	126.127	85952.6	127.13	15963	93083.1	9389.48	0.100872	9.91355	3.3094
	20	RPA1:612---RPA2:513	1.61175
				-141	39.4149	JL033021_040221_RPA2HFH_Q2_5to1_50B.14761.14761.4	P	1.61175	0.0504784	0.47	//15	8//72	1.4355	0.576923	R.GSFFAQLK[1334.79]TTTVR.K	4YM7_2_RPA2	1	RPA2	GSFFAQLKTTTVR	513	//11	4//43	0.17625	0.222222	R.VLPNEK[1720.95]TLR.L	4YM7_1_RPA1	1	RPA1	VLPNEKTLR	612	126.127	68893.6	127.13	19258.4	74556.4	14452.1	0.193842	5.15885	2.36705
	21	RPA1:612---RPA2:266	2.8345
				-141	39.1983	JL033021_040221_RPA2HFH_Q2_2to1_50B.15786.15786.4	P	2.8345	0.0892475	0.211	//14	13//82	2.4005	1.26923	R.K[1334.79]NEYLVPVVM[147.04]ILK.A	4YM7_2_RPA2	1	RPA2	KNEYLVPVVMILK	266	//11	4//43	0.434	0.444444	R.VLPNEK[1827.06]TLR.L	4YM7_1_RPA1	1	RPA1	VLPNEKTLR	612	126.127	96723.4	127.13	43699.3	104538	38144.2	0.364883	2.7406	1.45449
	22	RPA1:612---RPA2:916	1.591
				-141	43.7518	JL033021_040221_RPA2HFH_Q2_1to5_1ug.11693.11693.5	P	1.591	0.0607658	0.285	//13	8//74	0.8155	0.681818	R.TPQIGDK[1334.79]FSSR.H	4YM7_2_RPA2	1	RPA2	TPQIGDKFSSR	916	//11	6//54	0.7755	0.333333	R.VLPNEK[1500.79]TLR.L	4YM7_1_RPA1	1	RPA1	VLPNEKTLR	612	126.127	13154	127.13	50912	13851	53375.5	3.85356	0.259501	-1.94619
				-142	44.3072	JL033021_040221_RPA2HFH_Q2_1to5_50B.11363.11363.4	P	0.24975	0.00655589	0.641	//13	3//59	0.14325	0.136364	R.TPQIGDK[1334.79]FSSR.H	4YM7_2_RPA2	1	RPA2	TPQIGDKFSSR	916	//11	2//44	0.1065	0.111111	R.VLPNEK[1500.79]TLR.L	4YM7_1_RPA1	1	RPA1	VLPNEKTLR	612	126.127	37774.8	127.13	145074	39785.6	152068	3.82218	0.261631	-1.9344
	23	RPA1:612---RPA2:1043	1.868
				-141	40.5573	JL033021_040221_RPA2HFH_Q2_1to1_100B.10851.10851.4	P	1.868	0.0639321	0.185	//12	7//55	1.1995	0.85	R.HM[147.04]VNDK[1334.79]FQVR.S	4YM7_2_RPA2	1	RPA2	HMVNDKFQVR	1043	//11	7//44	0.6685	0.777778	R.VLPNEK[1554.8]TLR.L	4YM7_1_RPA1	1	RPA1	VLPNEKTLR	612	126.127	125645	127.13	135357	135157	133767	0.989712	1.0104	0.0149197
				-141	42.0249	JL033021_040221_RPA2HFH_Q2_1to10_100B.10805.10805.4	P	1.743	0.0561217	0.0275	//12	8//55	1.12575	0.9	R.HM[147.04]VNDK[1334.79]FQVR.S	4YM7_2_RPA2	1	RPA2	HMVNDKFQVR	1043	//11	6//44	0.61725	0.611111	R.VLPNEK[1554.8]TLR.L	4YM7_1_RPA1	1	RPA1	VLPNEKTLR	612	126.127	29125	127.13	213693	29847.1	226375	7.58449	0.131848	-2.92305
	24	RPA1:721---RPA2:416	1.90275
				-143	31.3729	JL033021_040221_RPA2HFH_Q2_1to10_50B.19658.19658.6	P	1.90275	0.0634514	0.59	//15	4//136	0.3365	0.166667	K.IVTLPPTIFK[2097.15]PYPLWTGK.Q	4YM7_1_RPA1	1	RPA1	IVTLPPTIFKPYPLWTGK	721	//14	9//115	1.56625	0.533333	K.EK[2336.35]IDEYLQNIIAQVR.M	4YM7_2_RPA2	1	RPA2	EKIDEYLQNIIAQVR	416	126.127	4499.98	127.13	27794	4654.02	29379.6	6.31273	0.15841	-2.65826
17	RPA1---RPB5
	1	RPA1:555---RPB5:201	4.75325
				-143	39.5638	JL033021_040221_RPA2HFH_Q2_10to1_50B.10150.10150.4	P	4.75325	0.204582	0.641	//18	16//137	4.57	0.857143	R.K[1029.55]ALANQLLTPSSNVSTHTLNK.K	4YM7_1_RPA1	1	RPA1	KALANQLLTPSSNVSTHTLNK	555	//8	2//32	0.18325	0.142857	R.K[2502.38]SETSGR.Y	4YM7_5_RPB5	1	RPB5	KSETSGR	201	126.127	30414.1	127.13	4325.81	32947.9	1905.1	0.0578216	17.2946	4.11225
	2	RPA1:555---RPB5:171	6.67125
				-141	30.417	JL033021_040221_RPA2HFH_Q2_10to1_50B.11781.11781.5	P	6.67125	0.23454	1.28e-14	//18	18//180	6.37325	1.2619	R.K[1235.72]ALANQLLTPSSNVSTHTLNK.K	4YM7_1_RPA1	1	RPA1	KALANQLLTPSSNVSTHTLNK	555	//8	4//43	0.298	0.5	R.LK[2502.38]ESQLPR.I	4YM7_5_RPB5	1	RPB5	LKESQLPR	171	126.127	82114.6	127.13	14847.6	88930	8538.77	0.0960167	10.4149	3.38057
	3	RPA1:111---RPB5:201	4.4225
				0	0.579599	JL033021_040221_RPA2HFH_Q2_10to1_100B.05250.05250.4	N	4.4225	0.259149		//8	9//38	3.4155	1.78571	R.LK[1170.64]SVEVHR.Y	4YM7_1_RPA1	1	RPA1	LKSVEVHR	111	//8	4//36	1.007	0.857143	R.K[1373.82]SETSGR.Y	4YM7_5_RPB5	1	RPB5	KSETSGR	201	126.127	58647.5	127.13	10120.5	63519.1	5580	0.0878475	11.3834	3.50885
				-143	-32.6199	JL033021_040221_RPA2HFH_Q2_5to1_100B.05306.05306.4	P	1.67125	0.108727	0.654	//8	4//39	1.078	0.75	R.LK[1029.55]SVEVHR.Y	4YM7_1_RPA1	1	RPA1	LKSVEVHR	111	//8	3//38	0.59325	0.357143	R.K[1232.72]SETSGR.Y	4YM7_5_RPB5	1	RPB5	KSETSGR	201	126.127	53956.8	127.13	12582.2	58412.1	8638.99	0.147897	6.76145	2.75733
	4	RPA1:848---RPB5:201	3.8035
				-141	46.5418	JL033021_040221_RPA2HFH_Q2_10to1_1ug.08299.08299.4	P	3.8035	0.163641	0.287	//14	12//71	3.5705	1.29167	R.TDILK[1029.55]TSVDTGR.E	4YM7_1_RPA1	1	RPA1	TDILKTSVDTGR	848	1//8	5//37	0.233	0.5	R.K[1570.86]SETSGR.Y	4YM7_5_RPB5	1	RPB5	KSETSGR	201	126.127	96438.8	127.13	17468.6	104443	10061.5	0.0963346	10.3805	3.3758
				-141	44.7712	JL033021_040221_RPA2HFH_Q2_2to1_50B.07763.07763.4	P	3.308	0.149443	0.151	//14	11//71	2.93575	1.125	R.TDILK[1029.55]TSVDTGR.E	4YM7_1_RPA1	1	RPA1	TDILKTSVDTGR	848	2//8	7//37	0.37225	0.785714	R.K[1570.86]SETSGR.Y	4YM7_5_RPB5	1	RPB5	KSETSGR	201	126.127	190737	127.131	91618.8	206104	81054	0.393268	2.54279	1.34641
	5	RPA1:604---RPB5:171	3.57525
				0	7.94479	JL033021_040221_RPA2HFH_Q2_2to1_100B.06114.06114.4	N	3.57525	0.179242		1//11	8//43	2.22125	1	K.ASM[147.04]M[147.04]GHK[1376.84]VR.V	4YM7_1_RPA1	1	RPA1	ASMMGHKVR	604	//8	7//36	1.354	1.5	R.LK[1454.77]ESQLPR.I	4YM7_5_RPB5	1	RPB5	LKESQLPR	171	126.127	47159.4	127.13	21057	50971.6	18330.7	0.359626	2.78067	1.47543
	6	RPA1:1260---RPB5:197	7.677
				-141	22.9925	JL033021_040221_RPA2HFH_Q2_1to10_D.24365.24365.5	P	7.677	0.246298	0.00318	//14	16//266	7.386	0.84375	K.SISK[1178.74]VLLSEVIDKVIVTETTGTSNTAGGNAAR.S	4YM7_1_RPA1	1	RPA1	SISKVLLSEVIDKVIVTETTGTSNTAGGNAAR	1260	//10	2//45	0.291	0.25	R.GEVVK[3496.9]IIR.K	4YM7_5_RPB5	1	RPB5	GEVVKIIR	197	126.127	9609.52	127.13	51226.3	10004.6	54030.5	5.40058	0.185165	-2.43311
	7	RPA1:267---RPB5:171	3.5145
				-141	58.8451	JL033021_040221_RPA2HFH_Q2_2to1_50B.09361.09361.4	P	3.5145	0.154463	0.00159	//8	7//40	3.13225	1.3125	R.LK[984.61]ESQLPR.I	4YM7_5_RPB5	1	RPB5	LKESQLPR	171	//6	4//28	0.38225	0.5	R.VK[1235.72]GFIR.Q	4YM7_1_RPA1	1	RPA1	VKGFIR	267	126.127	119745	127.131	64349.5	129337	58205.9	0.450035	2.22205	1.15189
				-141	57.2408	JL033021_040221_RPA2HFH_Q2_1to5_50B.09983.09983.4	P	2.5615	0.102888	0.00149	//8	5//40	1.9875	1	R.LK[984.61]ESQLPR.I	4YM7_5_RPB5	1	RPB5	LKESQLPR	171	//6	4//28	0.574	1	R.VK[1235.72]GFIR.Q	4YM7_1_RPA1	1	RPA1	VKGFIR	267	126.127	40746.8	127.131	149300	42974.3	156329	3.63773	0.274897	-1.86304
	8	RPA1:1363---RPB5:171	6.746
				0	1.79185	JL033021_040221_RPA2HFH_Q2_1to2_50B.07671.07671.5	N	6.746	0.222736		//16	11//94	4.32475	1.15385	R.LQTDVANSSSNSK[1376.82]R.L	4YM7_1_RPA1	1	RPA1	LQTDVANSSSNSKR	1363	//8	8//40	2.42125	1.57143	R.LK[1913]ESQLPR.I	4YM7_5_RPB5	1	RPB5	LKESQLPR	171	126.127	69728.9	127.13	104963	74765.2	106216	1.42067	0.703895	-0.506569
				-1	0.684843	JL033021_040221_RPA2HFH_Q2_5to1_50B.07887.07887.5	N	5.99675	0.209001		//16	10//94	3.66575	1	R.LQTDVANSSSNSK[1376.82]R.L	4YM7_1_RPA1	1	RPA1	LQTDVANSSSNSKR	1363	//8	8//40	2.331	1.57143	R.LK[1913.01]ESQLPR.I	4YM7_5_RPB5	1	RPB5	LKESQLPR	171	126.127	97395.5	127.13	24173.1	105426	17160	0.162768	6.1437	2.61911
				-141	40.2832	JL033021_040221_RPA2HFH_Q2_1to5_50B.07762.07762.5	NP	3.0565	0.102904	0.349	//16	5//103	0.712	0.357143	R.LQTDVANSSSNSK[1235.72]R.L	4YM7_1_RPA1	1	RPA1	LQTDVANSSSNSKR	1363	//8	7//44	2.3445	1.3125	R.LK[1771.91]ESQLPR.I	4YM7_5_RPB5	1	RPB5	LKESQLPR	171	126.127	36501.5	127.13	128611	38538.7	134541	3.49106	0.286446	-1.80366
				-141	39.1155	JL033021_040221_RPA2HFH_Q2_1to10_50B.07858.07858.5	NP	3.0495	0.105018	0.401	//16	6//103	0.8815	0.392857	R.LQTDVANSSSNSK[1235.72]R.L	4YM7_1_RPA1	1	RPA1	LQTDVANSSSNSKR	1363	//8	7//44	2.168	1.3125	R.LK[1771.91]ESQLPR.I	4YM7_5_RPB5	1	RPB5	LKESQLPR	171	126.127	21569	127.13	136311	22282.2	144132	6.46849	0.154596	-2.69343
	9	RPA1:1173---RPB5:201	5.296
				0	0.149668	JL033021_040221_RPA2HFH_Q2_10to1_1ug.07089.07089.4	N	5.296	0.222003		//11	11//46	3.6975	2	R.ALM[147.04]QLK[1170.64]YM[147.04]R.S	4YM7_1_RPA1	1	RPA1	ALMQLKYMR	1173	//8	7//35	1.5985	1.21429	R.K[1591.87]SETSGR.Y	4YM7_5_RPB5	1	RPB5	KSETSGR	201	126.127	80027.6	127.13	13100.6	86680.9	6854.01	0.0790717	12.6467	3.66069
				0	7.49427	JL033021_040221_RPA2HFH_Q2_1to1_50B.07348.07348.4	N	4.585	0.168684		//11	11//46	2.8915	1.8125	R.ALM[147.04]QLK[1170.63]YM[147.04]R.S	4YM7_1_RPA1	1	RPA1	ALMQLKYMR	1173	//8	7//35	1.6935	1.21429	R.K[1591.85]SETSGR.Y	4YM7_5_RPB5	1	RPB5	KSETSGR	201	126.127	62939	127.13	61611.4	67754.3	60371.5	0.891035	1.12229	0.166445
				-141	48.4744	JL033021_040221_RPA2HFH_Q2_2to1_50B.06590.06590.4	NP	2.7065	0.106277	0.0147	//11	7//53	1.35675	0.944444	R.ALM[147.04]QLK[1029.55]YM[147.04]R.S	4YM7_1_RPA1	1	RPA1	ALMQLKYMR	1173	//8	5//38	1.34975	0.928571	R.K[1450.77]SETSGR.Y	4YM7_5_RPB5	1	RPB5	KSETSGR	201	126.127	204185	127.13	98050.6	220634	86739	0.393135	2.54366	1.34691
				-143	46.953	JL033021_040221_RPA2HFH_Q2_5to1_50B.07212.07212.4	NP	2.674	0.106347	5.8e-06	//11	6//53	1.32	0.888889	R.ALM[147.04]QLK[1029.55]YM[147.04]R.S	4YM7_1_RPA1	1	RPA1	ALMQLKYMR	1173	//8	4//38	1.354	0.857143	R.K[1450.77]SETSGR.Y	4YM7_5_RPB5	1	RPB5	KSETSGR	201	126.127	94674.4	127.13	22384.4	102489	15487.5	0.151113	6.61755	2.7263
				-141	49.1766	JL033021_040221_RPA2HFH_Q2_10to1_50B.07183.07183.4	NP	2.4835	0.0963961	4.37e-08	//11	5//53	0.99	0.666667	R.ALM[147.04]QLK[1029.55]YM[147.04]R.S	4YM7_1_RPA1	1	RPA1	ALMQLKYMR	1173	//8	5//38	1.4935	0.928571	R.K[1450.77]SETSGR.Y	4YM7_5_RPB5	1	RPB5	KSETSGR	201	126.127	99856.4	127.13	16612.1	108156	8836.78	0.081704	12.2393	3.61345
				-141	48.8255	JL033021_040221_RPA2HFH_Q2_5to1_50B.07201.07201.4	NP	2.35875	0.100631	0.000857	//11	6//53	1.01025	0.722222	R.ALM[147.04]QLK[1029.55]YM[147.04]R.S	4YM7_1_RPA1	1	RPA1	ALMQLKYMR	1173	//8	4//38	1.3485	0.857143	R.K[1450.77]SETSGR.Y	4YM7_5_RPB5	1	RPB5	KSETSGR	201	126.127	85234	127.13	19262.7	92277	12989.8	0.14077	7.10379	2.82859
				-141	46.7189	JL033021_040221_RPA2HFH_Q2_1to2_50B.07065.07065.4	NP	2.334	0.0854163	0.199	//11	7//53	1.186	0.944444	R.ALM[147.04]QLK[1029.55]YM[147.04]R.S	4YM7_1_RPA1	1	RPA1	ALMQLKYMR	1173	//8	4//38	1.148	0.857143	R.K[1450.77]SETSGR.Y	4YM7_5_RPB5	1	RPB5	KSETSGR	201	126.127	59348.2	127.13	90605.6	63624.4	91763.5	1.44227	0.693352	-0.52834
				-141	44.7293	JL033021_040221_RPA2HFH_Q2_10to1_50B.07177.07177.4	NP	2.2755	0.0927262	6.19e-09	//11	5//53	0.9845	0.666667	R.ALM[147.04]QLK[1029.55]YM[147.04]R.S	4YM7_1_RPA1	1	RPA1	ALMQLKYMR	1173	//8	4//38	1.291	0.857143	R.K[1450.77]SETSGR.Y	4YM7_5_RPB5	1	RPB5	KSETSGR	201	126.127	95035.2	127.13	17026	102924	9713.17	0.094372	10.5964	3.4055
				-141	40.5161	JL033021_040221_RPA2HFH_Q2_1to5_50B.07137.07137.4	NP	2.26025	0.0821685	0.138	//11	6//53	1.00475	0.722222	R.ALM[147.04]QLK[1029.55]YM[147.04]R.S	4YM7_1_RPA1	1	RPA1	ALMQLKYMR	1173	//8	4//38	1.2555	0.857143	R.K[1450.77]SETSGR.Y	4YM7_5_RPB5	1	RPB5	KSETSGR	201	126.127	29933	127.131	95098.5	31687.9	99218.7	3.13112	0.319374	-1.64668
				-141	47.3041	JL033021_040221_RPA2HFH_Q2_1to10_50B.07266.07266.4	NP	2.0495	0.0714348	0.0169	//11	7//53	0.98	0.777778	R.ALM[147.04]QLK[1029.55]YM[147.04]R.S	4YM7_1_RPA1	1	RPA1	ALMQLKYMR	1173	//8	4//38	1.0695	0.642857	R.K[1450.77]SETSGR.Y	4YM7_5_RPB5	1	RPB5	KSETSGR	201	126.128	21161.9	127.131	129069	21899.6	136408	6.22879	0.160545	-2.63895
	10	RPA1:1173---RPB5:171	3.9015
				-141	45.3592	JL033021_040221_RPA2HFH_Q2_1to1_50B.10017.10017.4	NP	3.9015	0.132452	7.39e-09	//11	7//51	1.532	1.11111	R.ALM[147.04]QLK[1235.72]YM[147.04]R.S	4YM7_1_RPA1	1	RPA1	ALMQLKYMR	1173	//8	5//39	2.3695	1	R.LK[1450.77]ESQLPR.I	4YM7_5_RPB5	1	RPB5	LKESQLPR	171	126.127	85610.8	127.13	82636.2	92170.1	80866	0.877355	1.13979	0.188767
				-141	45.5722	JL033021_040221_RPA2HFH_Q2_5to1_50B.09881.09881.4	NP	3.8625	0.126812	1.63e-07	//11	6//51	1.3675	0.888889	R.ALM[147.04]QLK[1235.72]YM[147.04]R.S	4YM7_1_RPA1	1	RPA1	ALMQLKYMR	1173	//8	6//39	2.495	1.0625	R.LK[1450.77]ESQLPR.I	4YM7_5_RPB5	1	RPB5	LKESQLPR	171	126.127	137709	127.13	32643.8	149076	22618	0.151722	6.59102	2.7205
				-141	45.4657	JL033021_040221_RPA2HFH_Q2_10to1_50B.09874.09874.4	NP	3.702	0.128084	9.83e-09	//11	7//51	1.3765	1.11111	R.ALM[147.04]QLK[1235.72]YM[147.04]R.S	4YM7_1_RPA1	1	RPA1	ALMQLKYMR	1173	//8	5//39	2.3255	1	R.LK[1450.77]ESQLPR.I	4YM7_5_RPB5	1	RPB5	LKESQLPR	171	126.127	147693	127.13	27330.4	159946	16028	0.100209	9.97917	3.31892
				-141	44.8267	JL033021_040221_RPA2HFH_Q2_1to2_50B.09558.09558.4	NP	3.6805	0.119249	0.000846	//11	7//51	1.413	1.11111	R.ALM[147.04]QLK[1235.72]YM[147.04]R.S	4YM7_1_RPA1	1	RPA1	ALMQLKYMR	1173	//8	5//39	2.2675	1	R.LK[1450.77]ESQLPR.I	4YM7_5_RPB5	1	RPB5	LKESQLPR	171	126.127	106463	127.13	159063	114162	160892	1.40933	0.709559	-0.495005
				-141	44.8267	JL033021_040221_RPA2HFH_Q2_1to10_50B.09793.09793.4	NP	3.655	0.122041	0.00283	//11	7//51	1.4635	1.11111	R.ALM[147.04]QLK[1235.72]YM[147.04]R.S	4YM7_1_RPA1	1	RPA1	ALMQLKYMR	1173	//8	6//39	2.1915	1.0625	R.LK[1450.77]ESQLPR.I	4YM7_5_RPB5	1	RPB5	LKESQLPR	171	126.127	34699	127.13	199282	36009.2	210432	5.84384	0.17112	-2.54692
				-141	43.9746	JL033021_040221_RPA2HFH_Q2_2to1_50B.09188.09188.4	NP	3.61125	0.118656	0.00372	//11	7//51	1.37825	0.944444	R.ALM[147.04]QLK[1235.72]YM[147.04]R.S	4YM7_1_RPA1	1	RPA1	ALMQLKYMR	1173	//8	5//39	2.233	1	R.LK[1450.77]ESQLPR.I	4YM7_5_RPB5	1	RPB5	LKESQLPR	171	126.127	206756	127.13	93387.3	223461	81511.1	0.364767	2.74148	1.45495
				-141	44.0221	JL033021_040221_RPA2HFH_Q2_1to10_50B.09800.09800.5	NP	3.3375	0.155023	0.00304	//11	7//64	0.76275	0.944444	R.ALM[147.04]QLK[1235.72]YM[147.04]R.S	4YM7_1_RPA1	1	RPA1	ALMQLKYMR	1173	//8	6//47	2.57475	1.0625	R.LK[1450.77]ESQLPR.I	4YM7_5_RPB5	1	RPB5	LKESQLPR	171	126.127	24454.8	127.13	154581	25263.2	163450	6.46989	0.154562	-2.69374
				-141	44.4215	JL033021_040221_RPA2HFH_Q2_1to1_50B.10020.10020.5	NP	3.322	0.170784	2.36e-07	//11	7//64	0.702	0.777778	R.ALM[147.04]QLK[1235.72]YM[147.04]R.S	4YM7_1_RPA1	1	RPA1	ALMQLKYMR	1173	//8	7//47	2.62	1.25	R.LK[1450.77]ESQLPR.I	4YM7_5_RPB5	1	RPB5	LKESQLPR	171	126.127	99420.1	127.13	84890	107128	82041.3	0.765828	1.30578	0.384907
				-141	44.0811	JL033021_040221_RPA2HFH_Q2_1to1_1ug.09950.09950.4	NP	3.2295	0.120923	0.004	//11	6//51	1.251	0.888889	R.ALM[147.04]QLK[1235.72]YM[147.04]R.S	4YM7_1_RPA1	1	RPA1	ALMQLKYMR	1173	//8	5//39	1.9785	1	R.LK[1450.77]ESQLPR.I	4YM7_5_RPB5	1	RPB5	LKESQLPR	171	126.127	47375.3	127.13	44667.9	51013.8	43612.3	0.854911	1.16971	0.226153
				-141	44.2883	JL033021_040221_RPA2HFH_Q2_5to1_50B.09900.09900.5	P	3.1735	0.150685	0.00388	//11	8//64	0.62275	0.833333	R.ALM[147.04]QLK[1235.72]YM[147.04]R.S	4YM7_1_RPA1	1	RPA1	ALMQLKYMR	1173	//8	6//47	2.55075	1.0625	R.LK[1450.77]ESQLPR.I	4YM7_5_RPB5	1	RPB5	LKESQLPR	171	126.127	228124	127.13	47603.5	247007	30531.6	0.123607	8.09019	3.01617
				-141	43.8224	JL033021_040221_RPA2HFH_Q2_1to1_50B.10004.10004.5	NP	3.1615	0.152512	8.13e-06	//11	6//64	0.5965	0.722222	R.ALM[147.04]QLK[1235.72]YM[147.04]R.S	4YM7_1_RPA1	1	RPA1	ALMQLKYMR	1173	//8	6//47	2.565	1.0625	R.LK[1450.77]ESQLPR.I	4YM7_5_RPB5	1	RPB5	LKESQLPR	171	126.127	104928	127.13	90575.5	113055	87639.3	0.775194	1.29	0.36737
				-141	45.7528	JL033021_040221_RPA2HFH_Q2_1to5_50B.09761.09761.5	P	3.104	0.157684	0.00952	//11	6//64	0.5715	0.722222	R.ALM[147.04]QLK[1235.72]YM[147.04]R.S	4YM7_1_RPA1	1	RPA1	ALMQLKYMR	1173	//8	6//47	2.5325	1.0625	R.LK[1450.77]ESQLPR.I	4YM7_5_RPB5	1	RPB5	LKESQLPR	171	126.127	54935.3	127.13	182826	58088.6	190982	3.28776	0.304158	-1.71711
				-141	44.6137	JL033021_040221_RPA2HFH_Q2_1to1_50B.10003.10003.4	NP	3.0895	0.104946	8.01e-07	//11	6//51	1.0175	0.722222	R.ALM[147.04]QLK[1235.72]YM[147.04]R.S	4YM7_1_RPA1	1	RPA1	ALMQLKYMR	1173	//8	6//39	2.072	1.0625	R.LK[1450.77]ESQLPR.I	4YM7_5_RPB5	1	RPB5	LKESQLPR	171	126.128	84458	127.131	77819.2	90959.2	75807.6	0.833424	1.19987	0.262877
				-141	46.2113	JL033021_040221_RPA2HFH_Q2_1to5_50B.09760.09760.4	NP	3.087	0.104055	1.17e-05	//11	6//51	0.976	0.888889	R.ALM[147.04]QLK[1235.72]YM[147.04]R.S	4YM7_1_RPA1	1	RPA1	ALMQLKYMR	1173	//8	5//39	2.111	1	R.LK[1450.77]ESQLPR.I	4YM7_5_RPB5	1	RPB5	LKESQLPR	171	126.127	59388.9	127.13	205154	62736.8	214508	3.41917	0.292468	-1.77365
				-141	44.5546	JL033021_040221_RPA2HFH_Q2_1to10_1ug.10042.10042.5	P	2.989	0.174154	0.0541	//11	6//64	0.49675	0.722222	R.ALM[147.04]QLK[1235.72]YM[147.04]R.S	4YM7_1_RPA1	1	RPA1	ALMQLKYMR	1173	//8	6//47	2.49225	1.0625	R.LK[1450.77]ESQLPR.I	4YM7_5_RPB5	1	RPB5	LKESQLPR	171	126.127	18028.4	127.13	92153.2	18801.7	97131.2	5.16609	0.19357	-2.36907
				-141	43.3564	JL033021_040221_RPA2HFH_Q2_2to1_1ug.09960.09960.5	P	2.91025	0.158718	0.235	//11	6//64	0.52525	0.722222	R.ALM[147.04]QLK[1235.72]YM[147.04]R.S	4YM7_1_RPA1	1	RPA1	ALMQLKYMR	1173	//8	5//47	2.385	1	R.LK[1450.77]ESQLPR.I	4YM7_5_RPB5	1	RPB5	LKESQLPR	171	126.127	85550.7	127.13	34439.7	92496.9	29224.8	0.315954	3.16501	1.66221
				-141	44.0221	JL033021_040221_RPA2HFH_Q2_1to2_50B.09574.09574.5	P	2.8815	0.141267	0.141	//11	6//64	0.529	0.722222	R.ALM[147.04]QLK[1235.72]YM[147.04]R.S	4YM7_1_RPA1	1	RPA1	ALMQLKYMR	1173	//8	6//47	2.3525	1.0625	R.LK[1450.77]ESQLPR.I	4YM7_5_RPB5	1	RPB5	LKESQLPR	171	126.127	89271.7	127.13	122670	95814.7	123437	1.28829	0.776225	-0.365454
				-141	45.42	JL033021_040221_RPA2HFH_Q2_10to1_50B.09881.09881.5	P	2.81475	0.144788	1.48e-06	//11	6//64	0.4615	0.722222	R.ALM[147.04]QLK[1235.72]YM[147.04]R.S	4YM7_1_RPA1	1	RPA1	ALMQLKYMR	1173	//8	6//47	2.35325	1.0625	R.LK[1450.77]ESQLPR.I	4YM7_5_RPB5	1	RPB5	LKESQLPR	171	126.127	154148	127.13	22455.1	166986	10224.3	0.0612284	16.3323	4.02965
				-141	45.3534	JL033021_040221_RPA2HFH_Q2_1to2_1ug.10037.10037.5	P	2.807	0.147807	0.532	//11	6//64	0.4175	0.722222	R.ALM[147.04]QLK[1235.72]YM[147.04]R.S	4YM7_1_RPA1	1	RPA1	ALMQLKYMR	1173	//8	6//47	2.3895	1.0625	R.LK[1450.77]ESQLPR.I	4YM7_5_RPB5	1	RPB5	LKESQLPR	171	126.127	35891.4	127.13	52375	38497.1	52902.1	1.37418	0.727705	-0.458574
				-141	42.0251	JL033021_040221_RPA2HFH_Q2_10to1_1ug.09889.09889.5	P	2.76325	0.134041	0.0445	//11	5//64	0.301	0.388889	R.ALM[147.04]QLK[1235.72]YM[147.04]R.S	4YM7_1_RPA1	1	RPA1	ALMQLKYMR	1173	//8	6//47	2.46225	1.0625	R.LK[1450.77]ESQLPR.I	4YM7_5_RPB5	1	RPB5	LKESQLPR	171	126.127	126335	127.13	19506.3	136848	9561.12	0.0698669	14.3129	3.83925
				-141	45.7528	JL033021_040221_RPA2HFH_Q2_1to10_1ug.10021.10021.5	P	2.58075	0.144693	0.0219	//11	6//64	0.29125	0.444444	R.ALM[147.04]QLK[1235.72]YM[147.04]R.S	4YM7_1_RPA1	1	RPA1	ALMQLKYMR	1173	//8	5//47	2.2895	1	R.LK[1450.77]ESQLPR.I	4YM7_5_RPB5	1	RPB5	LKESQLPR	171	126.127	13647.3	127.13	83478.9	14121.1	88229.3	6.24804	0.16005	-2.6434
				-142	44.9332	JL033021_040221_RPA2HFH_Q2_10to1_1ug.09880.09880.4	NP	2.5325	0.0908585	0.0571	//11	5//51	0.972	0.666667	R.ALM[147.04]QLK[1235.72]YM[147.04]R.S	4YM7_1_RPA1	1	RPA1	ALMQLKYMR	1173	//8	5//39	1.5605	0.8125	R.LK[1450.77]ESQLPR.I	4YM7_5_RPB5	1	RPB5	LKESQLPR	171	126.128	126058	127.131	21075.6	136535	11267.6	0.0825257	12.1174	3.59901
				-141	44.8267	JL033021_040221_RPA2HFH_Q2_1to1_1ug.09939.09939.4	P	2.32075	0.0851636	0.00386	//11	6//51	0.66925	0.611111	R.ALM[147.04]QLK[1235.72]YM[147.04]R.S	4YM7_1_RPA1	1	RPA1	ALMQLKYMR	1173	//8	5//39	1.6515	1	R.LK[1450.77]ESQLPR.I	4YM7_5_RPB5	1	RPB5	LKESQLPR	171	126.127	53272.9	127.13	42871.8	57424.2	41158.2	0.71674	1.39521	0.480479
				-141	43.3356	JL033021_040221_RPA2HFH_Q2_1to2_1ug.10044.10044.4	P	2.0795	0.076791	0.000532	//11	6//51	0.8335	0.888889	R.ALM[147.04]QLK[1235.72]YM[147.04]R.S	4YM7_1_RPA1	1	RPA1	ALMQLKYMR	1173	//8	4//39	1.246	0.75	R.LK[1450.77]ESQLPR.I	4YM7_5_RPB5	1	RPB5	LKESQLPR	171	126.127	35039.4	127.13	51282.3	37582	51807.6	1.37852	0.725415	-0.463121
				-141	48.4479	JL033021_040221_RPA2HFH_Q2_1to10_1ug.10058.10058.4	P	1.834	0.0710935	0.000605	//11	6//51	0.6465	0.888889	R.ALM[147.04]QLK[1235.72]YM[147.04]R.S	4YM7_1_RPA1	1	RPA1	ALMQLKYMR	1173	//8	6//39	1.1875	1.0625	R.LK[1450.77]ESQLPR.I	4YM7_5_RPB5	1	RPB5	LKESQLPR	171	126.127	11847.6	127.13	68848	12288.4	72712.7	5.9172	0.168999	-2.56491
				-141	42.803	JL033021_040221_RPA2HFH_Q2_1to5_1ug.10010.10010.4	P	1.6955	0.0658587	0.00336	//11	5//51	0.3835	0.666667	R.ALM[147.04]QLK[1235.72]YM[147.04]R.S	4YM7_1_RPA1	1	RPA1	ALMQLKYMR	1173	//8	5//39	1.312	1	R.LK[1450.77]ESQLPR.I	4YM7_5_RPB5	1	RPB5	LKESQLPR	171	126.127	16542.6	127.13	58049.2	17467.8	60719.3	3.47607	0.287681	-1.79746
				-141	45.2527	JL033021_040221_RPA2HFH_Q2_2to1_1ug.09983.09983.4	P	1.3675	0.0507252	0.009	//11	3//51	0.2595	0.277778	R.ALM[147.04]QLK[1235.72]YM[147.04]R.S	4YM7_1_RPA1	1	RPA1	ALMQLKYMR	1173	//8	5//39	1.108	1	R.LK[1450.77]ESQLPR.I	4YM7_5_RPB5	1	RPB5	LKESQLPR	171	126.127	70553.8	127.13	30258.9	76267.3	26091.1	0.3421	2.92312	1.54751
	11	RPA1:1516---RPB5:201	4.47975
				0	2.70051	JL033021_040221_RPA2HFH_Q2_10to1_1ug.03989.03989.5	N	4.47975	0.206321		//13	9//71	1.759	0.9	R.C[160.03]VHPEPENGK[1170.65]R.V	4YM7_1_RPA1	1	RPA1	CVHPEPENGKR	1516	//8	8//41	2.72075	1.5	R.K[1728.89]SETSGR.Y	4YM7_5_RPB5	1	RPB5	KSETSGR	201	126.127	59547.4	127.13	10850.1	64489	6281.03	0.0973969	10.2673	3.35998
				0	1.92601	JL033021_040221_RPA2HFH_Q2_2to1_50B.03760.03760.5	N	3.99	0.166371		3//13	11//71	1.82525	0.9	R.C[160.03]VHPEPENGK[1170.65]R.V	4YM7_1_RPA1	1	RPA1	CVHPEPENGKR	1516	1//8	8//41	2.16475	1.28571	R.K[1728.89]SETSGR.Y	4YM7_5_RPB5	1	RPB5	KSETSGR	201	126.127	110514	127.131	45845.3	119476	39205.8	0.328149	3.0474	1.60758
18	RPA1---RPA49
	1	RPA1:111---RPA49:106	1.6505
				345	-230.637	JL033021_040221_RPA2HFH_Q2_5to1_100B.09502.09502.3	P	1.6505	0.0826221	0.58	//8	5//32	0.9925	0.8125	R.LK[969.56]SVEVHR.Y	4YM7_1_RPA1	1	RPA1	LKSVEVHR	111	//8	3//23	0.658	0.666667	K.SSK[1232.72]NLR.G	4YM7_13_RPA49	1	RPA49	SSKNLR	106	126.127	97560	127.13	22932	105614	15815.3	0.149746	6.67799	2.73941
	2	RPA1:529---RPA49:44	7.87625
				-440	60.3853	JL033021_040221_RPA2HFH_Q2_2to1_D.19046.19046.6	P	7.87625	0.29925	0.226	//9	23//281	7.71575	0.911765	R.QAVINGPDK[2210.13]WPGATQIQNEDGSLVSLIGM[147.04]SVEQR.K	4YM7_1_RPA1	1	RPA1	QAVINGPDKWPGATQIQNEDGSLVSLIGMSVEQR	529	1//16	4//132	0.1605	0.125	K.K[3918.98]KSEKDEFVLHGENER.L	4YM7_13_RPA49	1	RPA49	KKSEKDEFVLHGENER	44	126.126	39534.1	127.13	18679	42721.6	16467	0.385448	2.59439	1.37539
19	RPA1---RPA12
	1	RPA12:68---RPA1:866	3.77775
				-143	22.763	JL033021_040221_RPA2HFH_Q2_10to1_1ug.12435.12435.5	P	3.77775	0.122131	0.0815	//12	25//176	3.57425	1.06522	R.EAAAEVTNLDK[1126.7]DTPADDPELLKR.L	4YM7_1_RPA1	1	RPA1	EAAAEVTNLDKDTPADDPELLKR	866	//10	4//44	0.2035	0.375	K.SVVK[2776.41]TSLK.K	4YM7_9_RPA12	1	RPA12	SVVKTSLK	68	126.127	73728.1	127.13	13664.7	79844.7	8024.04	0.100496	9.95069	3.3148
	2	RPA12:64---RPA1:1269	9.922
				-141	23.2147	JL033021_040221_RPA2HFH_Q2_1to10_D.25373.25373.4	P	9.922	0.304249	0.275	//9	20//163	9.922	1.07143	K.VLLSEVIDK[1024.66]VIVTETTGTSNTAGGNAAR.S	4YM7_1_RPA1	1	RPA1	VLLSEVIDKVIVTETTGTSNTAGGNAAR	1269	//9	//30	0	0	R.AKK[3081.66]SVVK.T	4YM7_9_RPA12	1	RPA12	AKKSVVK	64	126.127	7711.62	127.13	38658.9	8048.58	40733.9	5.06101	0.197589	-2.33942
20	RPA12---RPA2
	1	RPA12:46---RPA2:298	12.8048
				-141	26.3138	JL033021_040221_RPA2HFH_Q2_1to2_D.20964.20964.5	NP	12.8048	0.441574	1.01e-19	//13	21//172	9.145	1.25	K.SQFSNLK[2419.23]VVTTTADDAFPSSLR.A	4YM7_9_RPA12	1	RPA12	SQFSNLKVVTTTADDAFPSSLR	46	1//16	19//145	3.65975	1.13158	R.EIFDGIIGNDVK[2649.36]DSFLTDR.L	4YM7_2_RPA2	1	RPA2	EIFDGIIGNDVKDSFLTDR	298	126.127	20537.9	127.13	28204.6	22043.4	28379.8	1.28745	0.776727	-0.36452
				-141	27.1626	JL033021_040221_RPA2HFH_Q2_1to2_D.20968.20968.5	NP	12.3295	0.436249	3.69e-22	//13	21//172	8.95	1.43182	K.SQFSNLK[2419.23]VVTTTADDAFPSSLR.A	4YM7_9_RPA12	1	RPA12	SQFSNLKVVTTTADDAFPSSLR	46	//16	16//145	3.3795	1.23684	R.EIFDGIIGNDVK[2649.36]DSFLTDR.L	4YM7_2_RPA2	1	RPA2	EIFDGIIGNDVKDSFLTDR	298	126.127	18046.1	127.13	30732.2	19320.5	31312	1.62066	0.617032	-0.696582
				-141	23.9635	JL033021_040221_RPA2HFH_Q2_1to10_D.21047.21047.5	NP	11.5258	0.391653	2.23e-11	//13	19//172	8.596	1.34091	K.SQFSNLK[2419.23]VVTTTADDAFPSSLR.A	4YM7_9_RPA12	1	RPA12	SQFSNLKVVTTTADDAFPSSLR	46	//16	18//145	2.92975	0.973684	R.EIFDGIIGNDVK[2649.36]DSFLTDR.L	4YM7_2_RPA2	1	RPA2	EIFDGIIGNDVKDSFLTDR	298	126.127	10338.5	127.13	56961.6	10748.5	60110.9	5.59247	0.178812	-2.48349
				-141	20.0677	JL033021_040221_RPA2HFH_Q2_2to1_1ug.23309.23309.6	NP	11.493	0.302161	0.00022	//8	20//193	3.934	0.86	R.EIFDGIIGNDVK[2649.36]DSFLTDRLELLLR.G	4YM7_2_RPA2	1	RPA2	EIFDGIIGNDVKDSFLTDRLELLLR	298	//13	25//172	7.559	1.40909	K.SQFSNLK[3156.71]VVTTTADDAFPSSLR.A	4YM7_9_RPA12	1	RPA12	SQFSNLKVVTTTADDAFPSSLR	46	126.127	72072.6	127.13	36331.6	77865	32462.1	0.416903	2.39864	1.26222
				-141	19.1203	JL033021_040221_RPA2HFH_Q2_10to1_1ug.23351.23351.6	NP	10.387	0.283701	0.0212	//8	16//193	2.969	0.68	R.EIFDGIIGNDVK[2649.36]DSFLTDRLELLLR.G	4YM7_2_RPA2	1	RPA2	EIFDGIIGNDVKDSFLTDRLELLLR	298	//13	21//172	7.418	1.27273	K.SQFSNLK[3156.71]VVTTTADDAFPSSLR.A	4YM7_9_RPA12	1	RPA12	SQFSNLKVVTTTADDAFPSSLR	46	126.128	86032.5	127.131	17875.2	93154.2	11431.4	0.122714	8.14901	3.02662
				-141	25.3998	JL033021_040221_RPA2HFH_Q2_2to1_1ug.20487.20487.5	NP	9.58475	0.27666	9.81e-06	//13	21//172	7.352	1.09091	K.SQFSNLK[2419.23]VVTTTADDAFPSSLR.A	4YM7_9_RPA12	1	RPA12	SQFSNLKVVTTTADDAFPSSLR	46	//16	16//145	2.23275	0.868421	R.EIFDGIIGNDVK[2649.36]DSFLTDR.L	4YM7_2_RPA2	1	RPA2	EIFDGIIGNDVKDSFLTDR	298	126.127	50965.8	127.13	24453.2	55071.9	21628.3	0.392728	2.54629	1.3484
				-143	28.8209	JL033021_040221_RPA2HFH_Q2_2to1_100B.21972.21972.5	NP	9.43375	0.293973	0.000224	//13	17//172	7.7225	1.15909	K.SQFSNLK[2419.23]VVTTTADDAFPSSLR.A	4YM7_9_RPA12	1	RPA12	SQFSNLKVVTTTADDAFPSSLR	46	//16	9//145	1.71125	0.578947	R.EIFDGIIGNDVK[2649.36]DSFLTDR.L	4YM7_2_RPA2	1	RPA2	EIFDGIIGNDVKDSFLTDR	298	126.127	40157	127.13	18115.2	43401.7	15806.9	0.364199	2.74575	1.4572
				-142	27.8285	JL033021_040221_RPA2HFH_Q2_1to10_D.20978.20978.5	NP	9.32625	0.340467	1.04e-08	//13	16//172	6.8865	1.20455	K.SQFSNLK[2419.23]VVTTTADDAFPSSLR.A	4YM7_9_RPA12	1	RPA12	SQFSNLKVVTTTADDAFPSSLR	46	//16	14//145	2.43975	0.921053	R.EIFDGIIGNDVK[2649.36]DSFLTDR.L	4YM7_2_RPA2	1	RPA2	EIFDGIIGNDVKDSFLTDR	298	126.127	9805.01	127.13	55950.6	10178.2	59075.4	5.80414	0.172291	-2.53708
				-142	25.2823	JL033021_040221_RPA2HFH_Q2_2to1_1ug.20472.20472.5	NP	9.32325	0.266018	0.000202	//13	22//172	7.43725	1.31818	K.SQFSNLK[2419.23]VVTTTADDAFPSSLR.A	4YM7_9_RPA12	1	RPA12	SQFSNLKVVTTTADDAFPSSLR	46	//16	11//145	1.886	0.526316	R.EIFDGIIGNDVK[2649.36]DSFLTDR.L	4YM7_2_RPA2	1	RPA2	EIFDGIIGNDVKDSFLTDR	298	126.127	57029.5	127.13	27031.8	61626.8	23847.1	0.38696	2.58425	1.36974
				-1	0.662696	JL033021_040221_RPA2HFH_Q2_1to10_D.20987.20987.5	N	9.054	0.338721		//18	18//171	6.59275	1.04762	K.SQFSNLK[2560.33]VVTTTADDAFPSSLR.A	4YM7_9_RPA12	1	RPA12	SQFSNLKVVTTTADDAFPSSLR	46	//19	13//144	2.46125	0.972222	R.EIFDGIIGNDVK[2790.47]DSFLTDR.L	4YM7_2_RPA2	1	RPA2	EIFDGIIGNDVKDSFLTDR	298	126.127	10765.1	127.13	63075.6	11161.3	66624.2	5.96919	0.167527	-2.57754
				-141	23.1147	JL033021_040221_RPA2HFH_Q2_2to1_D.21098.21098.5	NP	8.97575	0.309861	1.52e-08	//13	18//172	6.78975	0.954545	K.SQFSNLK[2419.23]VVTTTADDAFPSSLR.A	4YM7_9_RPA12	1	RPA12	SQFSNLKVVTTTADDAFPSSLR	46	//16	15//145	2.186	0.789474	R.EIFDGIIGNDVK[2649.36]DSFLTDR.L	4YM7_2_RPA2	1	RPA2	EIFDGIIGNDVKDSFLTDR	298	126.127	37084.5	127.13	19145.9	40061.3	17187.2	0.429023	2.33088	1.22087
				-1	1.86656	JL033021_040221_RPA2HFH_Q2_1to2_1ug.20436.20436.5	N	8.97575	0.264051		//18	18//171	7.13825	1.21429	K.SQFSNLK[2560.33]VVTTTADDAFPSSLR.A	4YM7_9_RPA12	1	RPA12	SQFSNLKVVTTTADDAFPSSLR	46	//19	14//144	1.8375	0.805556	R.EIFDGIIGNDVK[2790.47]DSFLTDR.L	4YM7_2_RPA2	1	RPA2	EIFDGIIGNDVKDSFLTDR	298	126.127	26383.7	127.13	40305.8	28284.5	40822.4	1.44328	0.692866	-0.529353
				-1	0.857975	JL033021_040221_RPA2HFH_Q2_1to10_1ug.20490.20490.5	N	8.79825	0.273293		//18	18//171	7.26175	1.07143	K.SQFSNLK[2560.32]VVTTTADDAFPSSLR.A	4YM7_9_RPA12	1	RPA12	SQFSNLKVVTTTADDAFPSSLR	46	//19	15//144	1.5365	0.777778	R.EIFDGIIGNDVK[2790.46]DSFLTDR.L	4YM7_2_RPA2	1	RPA2	EIFDGIIGNDVKDSFLTDR	298	126.127	5936.17	127.13	47387.1	6052.18	50246.2	8.30217	0.12045	-3.05349
				-143	21.5087	JL033021_040221_RPA2HFH_Q2_1to5_D.21043.21043.5	NP	8.7375	0.300046	6.16e-12	//13	16//172	6.232	1.04545	K.SQFSNLK[2419.23]VVTTTADDAFPSSLR.A	4YM7_9_RPA12	1	RPA12	SQFSNLKVVTTTADDAFPSSLR	46	//16	15//145	2.5055	0.973684	R.EIFDGIIGNDVK[2649.36]DSFLTDR.L	4YM7_2_RPA2	1	RPA2	EIFDGIIGNDVKDSFLTDR	298	126.127	14259.3	127.13	41510.2	15126.2	43201.5	2.85608	0.350131	-1.51403
				-142	25.7744	JL033021_040221_RPA2HFH_Q2_10to1_1ug.23322.23322.6	NP	8.73625	0.253408	0.00726	//8	17//193	2.91175	0.7	R.EIFDGIIGNDVK[2649.36]DSFLTDRLELLLR.G	4YM7_2_RPA2	1	RPA2	EIFDGIIGNDVKDSFLTDRLELLLR	298	//13	19//172	5.8245	1.11364	K.SQFSNLK[3156.71]VVTTTADDAFPSSLR.A	4YM7_9_RPA12	1	RPA12	SQFSNLKVVTTTADDAFPSSLR	46	126.127	62586.7	127.131	13494.4	67763.6	8841.8	0.13048	7.664	2.9381
				-142	29.2648	JL033021_040221_RPA2HFH_Q2_1to5_1ug.20391.20391.5	NP	8.42875	0.27137	5.9e-08	//13	20//172	6.3835	1.18182	K.SQFSNLK[2419.23]VVTTTADDAFPSSLR.A	4YM7_9_RPA12	1	RPA12	SQFSNLKVVTTTADDAFPSSLR	46	//16	19//145	2.04525	1	R.EIFDGIIGNDVK[2649.36]DSFLTDR.L	4YM7_2_RPA2	1	RPA2	EIFDGIIGNDVKDSFLTDR	298	126.127	12001.6	127.13	43481.1	12661.7	45516.1	3.59478	0.278181	-1.8459
				-142	22.6867	JL033021_040221_RPA2HFH_Q2_2to1_D.21160.21160.4	NP	8.362	0.291857	2.53e-06	//13	14//127	6.13575	0.909091	K.SQFSNLK[2419.23]VVTTTADDAFPSSLR.A	4YM7_9_RPA12	1	RPA12	SQFSNLKVVTTTADDAFPSSLR	46	//16	12//109	2.22625	0.631579	R.EIFDGIIGNDVK[2649.36]DSFLTDR.L	4YM7_2_RPA2	1	RPA2	EIFDGIIGNDVKDSFLTDR	298	126.127	22656.9	127.13	10846	24482.6	9588.38	0.391641	2.55336	1.35239
				-1	2.56353	JL033021_040221_RPA2HFH_Q2_1to1_1ug.20304.20304.5	N	8.14375	0.265433		//18	19//171	6.489	1.07143	K.SQFSNLK[2560.34]VVTTTADDAFPSSLR.A	4YM7_9_RPA12	1	RPA12	SQFSNLKVVTTTADDAFPSSLR	46	//19	12//144	1.65475	0.611111	R.EIFDGIIGNDVK[2790.48]DSFLTDR.L	4YM7_2_RPA2	1	RPA2	EIFDGIIGNDVKDSFLTDR	298	126.127	35949.8	127.13	30027.4	38742.2	28949.5	0.747236	1.33827	0.420365
				-2	9.87051	JL033021_040221_RPA2HFH_Q2_5to1_1ug.20325.20325.5	N	7.8745	0.221839		//18	18//171	5.7265	1.14286	K.SQFSNLK[2560.37]VVTTTADDAFPSSLR.A	4YM7_9_RPA12	1	RPA12	SQFSNLKVVTTTADDAFPSSLR	46	//19	16//144	2.148	0.972222	R.EIFDGIIGNDVK[2790.51]DSFLTDR.L	4YM7_2_RPA2	1	RPA2	EIFDGIIGNDVKDSFLTDR	298	126.127	53521.9	127.13	13242.4	57935.1	9385.55	0.162001	6.1728	2.62593
				-142	24.0418	JL033021_040221_RPA2HFH_Q2_1to5_D.21033.21033.5	NP	7.79025	0.270509	0.000104	//13	17//172	6.27125	1.06818	K.SQFSNLK[2419.23]VVTTTADDAFPSSLR.A	4YM7_9_RPA12	1	RPA12	SQFSNLKVVTTTADDAFPSSLR	46	//16	15//145	1.519	0.657895	R.EIFDGIIGNDVK[2649.36]DSFLTDR.L	4YM7_2_RPA2	1	RPA2	EIFDGIIGNDVKDSFLTDR	298	126.127	12676.6	127.13	37106.5	13445.6	38624.7	2.87266	0.348109	-1.52239
				-2	0.241704	JL033021_040221_RPA2HFH_Q2_1to2_100B.21963.21963.5	N	7.2315	0.237546		//18	15//171	5.30725	0.857143	K.SQFSNLK[2560.33]VVTTTADDAFPSSLR.A	4YM7_9_RPA12	1	RPA12	SQFSNLKVVTTTADDAFPSSLR	46	//19	10//144	1.92425	0.694444	R.EIFDGIIGNDVK[2790.46]DSFLTDR.L	4YM7_2_RPA2	1	RPA2	EIFDGIIGNDVKDSFLTDR	298	126.127	18205.7	127.13	25311.3	19537.7	25488.7	1.30459	0.766522	-0.383601
				-142	28.2231	JL033021_040221_RPA2HFH_Q2_1to2_D.20938.20938.4	P	6.898	0.302916	3.31e-06	//13	13//127	6.2415	0.886364	K.SQFSNLK[2419.23]VVTTTADDAFPSSLR.A	4YM7_9_RPA12	1	RPA12	SQFSNLKVVTTTADDAFPSSLR	46	//16	6//109	0.6565	0.210526	R.EIFDGIIGNDVK[2649.36]DSFLTDR.L	4YM7_2_RPA2	1	RPA2	EIFDGIIGNDVKDSFLTDR	298	126.127	9455.71	127.13	13095.2	10147.9	13183.7	1.29915	0.769732	-0.377573
				-2	3.97922	JL033021_040221_RPA2HFH_Q2_5to1_1ug.20377.20377.5	N	6.27825	0.158834		//18	17//171	4.79325	0.880952	K.SQFSNLK[2560.34]VVTTTADDAFPSSLR.A	4YM7_9_RPA12	1	RPA12	SQFSNLKVVTTTADDAFPSSLR	46	//19	13//144	1.485	0.611111	R.EIFDGIIGNDVK[2790.48]DSFLTDR.L	4YM7_2_RPA2	1	RPA2	EIFDGIIGNDVKDSFLTDR	298	126.127	48664.1	127.13	13646.3	52663.8	10254.4	0.194714	5.13573	2.36057
21	RPB5---RPB6
	1	RPB5:171---RPB6:70	1.1715
				-438	154.139	JL033021_040221_RPA2HFH_Q2_5to1_100B.07888.07888.4	P	1.1715	0.0717238	0.484	//8	6//40	1.002	1.25	R.LK[1011.63]ESQLPR.I	4YM7_5_RPB5	1	RPB5	LKESQLPR	171	//8	3//30	0.1695	0.416667	R.KTLK[1235.72]EK.A	4YM7_6_RPB6	1	RPB6	KTLKEK	70	126.127	69909.1	127.13	17127	75675	12077	0.159591	6.26603	2.64755
	2	RPB5:171---RPB6:72	4.35225
				-142	51.9853	JL033021_040221_RPA2HFH_Q2_2to1_50B.07322.07322.4	NP	4.35225	0.150259	1.08e-08	//8	6//39	2.9955	1.25	R.LK[950.58]ESQLPR.I	4YM7_5_RPB5	1	RPB5	LKESQLPR	171	//6	8//28	1.35675	1.25	K.EK[1235.72]AIPK.D	4YM7_6_RPB6	1	RPB6	EKAIPK	72	126.128	297341	127.131	120626	321476	102567	0.319051	3.1343	1.64814
				-141	57.2303	JL033021_040221_RPA2HFH_Q2_2to1_50B.07339.07339.4	NP	3.689	0.130369	3.81e-09	//8	6//39	2.719	1.25	R.LK[950.58]ESQLPR.I	4YM7_5_RPB5	1	RPB5	LKESQLPR	171	//6	7//28	0.97	1.25	K.EK[1235.72]AIPK.D	4YM7_6_RPB6	1	RPB6	EKAIPK	72	126.128	299527	127.131	115716	323886	97109.6	0.299826	3.33527	1.7378
				-141	52.1896	JL033021_040221_RPA2HFH_Q2_1to2_50B.07779.07779.4	P	3.51825	0.13752	0.000233	//8	6//39	2.983	1.25	R.LK[950.58]ESQLPR.I	4YM7_5_RPB5	1	RPB5	LKESQLPR	171	//6	5//28	0.53525	0.583333	K.EK[1235.72]AIPK.D	4YM7_6_RPB6	1	RPB6	EKAIPK	72	126.127	124137	127.13	155964	133354	155984	1.1697	0.854922	-0.226136
				-141	55.7317	JL033021_040221_RPA2HFH_Q2_1to10_50B.07986.07986.4	NP	3.37225	0.131775	0.00579	//8	6//39	2.4775	1.25	R.LK[950.58]ESQLPR.I	4YM7_5_RPB5	1	RPB5	LKESQLPR	171	//6	6//28	0.89475	0.916667	K.EK[1235.72]AIPK.D	4YM7_6_RPB6	1	RPB6	EKAIPK	72	126.128	47660.1	127.131	231614	49802.1	243915	4.89769	0.204178	-2.2921
				-141	60.0913	JL033021_040221_RPA2HFH_Q2_1to5_50B.07939.07939.4	P	3.3505	0.146384	0.0191	//8	6//39	2.8605	1.25	R.LK[950.58]ESQLPR.I	4YM7_5_RPB5	1	RPB5	LKESQLPR	171	//6	3//28	0.49	0.416667	K.EK[1235.72]AIPK.D	4YM7_6_RPB6	1	RPB6	EKAIPK	72	126.127	61846.3	127.13	168956	65696.2	175498	2.67136	0.37434	-1.41758
				-141	57.026	JL033021_040221_RPA2HFH_Q2_1to1_50B.08115.08115.4	P	3.348	0.15829	0.0327	//8	6//39	2.8685	1.25	R.LK[950.58]ESQLPR.I	4YM7_5_RPB5	1	RPB5	LKESQLPR	171	//6	4//28	0.4795	0.5	K.EK[1235.72]AIPK.D	4YM7_6_RPB6	1	RPB6	EKAIPK	72	126.127	92366	127.13	70760.7	99592.5	67533.9	0.678102	1.47471	0.560427
				-142	52.1215	JL033021_040221_RPA2HFH_Q2_5to1_50B.07963.07963.4	P	3.1085	0.122565	0.0386	//8	6//39	2.6155	1.25	R.LK[950.58]ESQLPR.I	4YM7_5_RPB5	1	RPB5	LKESQLPR	171	//6	3//28	0.493	0.416667	K.EK[1235.72]AIPK.D	4YM7_6_RPB6	1	RPB6	EKAIPK	72	126.127	236790	127.13	50932.9	256377	33321.5	0.129971	7.69404	2.94374
22	RPA2---RPA43
	1	RPA2:930---RPA43:5	7.14675
				-141	17.8584	JL033021_040221_RPA2HFH_Q2_1to2_D.18399.18399.6	P	7.14675	0.222592	0.000515	//11	20//279	7.09325	0.757576	K.GVC[160.03]SRK[1029.56]WPTIDM[147.04]PFSETGIQPDIIINPHAFPSR.M	4YM7_2_RPA2	1	RPA2	GVCSRKWPTIDMPFSETGIQPDIIINPHAFPSR	930	//9	1//36	0.0535	0.0833333	-.M[147.04]SQVK[4048.03]R.A	4YM7_7_RPA43	1	RPA43	MSQVKR	5	126.127	17050.5	127.13	25234.4	18285.5	25510	1.3951	0.716796	-0.480366
				-143	22.2112	JL033021_040221_RPA2HFH_Q2_1to2_D.18361.18361.6	P	5.147	0.175289	0.00718	//11	18//279	5.09425	0.530303	K.GVC[160.03]SRK[1029.56]WPTIDM[147.04]PFSETGIQPDIIINPHAFPSR.M	4YM7_2_RPA2	1	RPA2	GVCSRKWPTIDMPFSETGIQPDIIINPHAFPSR	930	//9	1//36	0.05275	0.0833333	-.M[147.04]SQVK[4048.03]R.A	4YM7_7_RPA43	1	RPA43	MSQVKR	5	126.127	16027.9	127.13	26071.4	17169.7	26498.8	1.54335	0.647942	-0.626063
23	RPA2---RPB6
	1	RPA2:120---RPB6:72	1.286
				-141	-204.516	JL033021_040221_RPA2HFH_Q2_5to1_100B.05645.05645.4	P	1.286	0.0742259	0.505	//9	5//42	1.165	1	R.K[932.57]VYPSESR.Q	4YM7_2_RPA2	1	RPA2	KVYPSESR	120	//9	2//33	0.121	0.333333	K.E[111.03]K[1230.66]AIPK.D	4YM7_6_RPB6	1	RPB6	EKAIPK	72	126.127	99844.4	127.13	22347.6	108096	14983.9	0.138616	7.21416	2.85083
	2	RPA2:930---RPB6:72	11.5297
				-143	16.5092	JL033021_040221_RPA2HFH_Q2_1to10_100B.18536.18536.5	P	11.5297	0.308031	0.442	//16	32//246	11.435	1.67857	R.K[1349.77]WPTIDM[147.04]PFSETGIQPDIIINPHAFPSR.M	4YM7_2_RPA2	1	RPA2	KWPTIDMPFSETGIQPDIIINPHAFPSR	930	//9	2//51	0.09475	0.111111	K.EK[3488.78]AIPKDQR.A	4YM7_6_RPB6	1	RPB6	EKAIPKDQR	72	126.127	8546.57	127.13	54331.2	8826.59	57453	6.50909	0.153631	-2.70246
24	RPA2---RPB10
	1	RPA2:1043---RPB10:59	0.888
				-141	32.742	JL033021_040221_RPA2HFH_Q2_10to1_1ug.17615.17615.5	P	0.888	0.0326081	0.601	//17	5//111	0.619	0.321429	R.M[147.04]ILTHVDLIEK[1554.8]FLR.Y	4YM7_10_RPB10	1	RPB10	MILTHVDLIEKFLR	59	//12	5//67	0.269	0.25	R.HM[147.04]VNDK[2009.14]FQVR.S	4YM7_2_RPA2	1	RPA2	HMVNDKFQVR	1043	126.126	74520.7	127.13	11973.8	80718	6140.96	0.0760791	13.1442	3.71636
	2	RPA2:808---RPB10:68	3.764
				-142	46.2089	JL033021_040221_RPA2HFH_Q2_1to1_1ug.12441.12441.4	NP	3.764	0.150819	0.0496	//12	8//53	2.94775	1.1	K.TEK[1299.68]VDLALNR.N	4YM7_2_RPA2	1	RPA2	TEKVDLALNR	808	//10	5//40	0.81625	0.625	R.YNPLEK[1423.8]RD.-	4YM7_10_RPB10	1	RPB10	YNPLEKRD	68	126.127	44687.6	127.13	43206.5	48110.9	42287.5	0.87896	1.13771	0.186131
	3	RPA2:30---RPB10:	4.42125
				0	1.53721	JL033021_040221_RPA2HFH_Q2_5to1_50B.10590.10590.4	N	4.42125	0.168355		//11	6//44	2.006	0.875	R.YNPLEK[1364.79]RD.-	4YM7_10_RPB10	1	RPB10	YNPLEKRD		1//10	14//35	2.41525	2.5	R.FINPPK[1440.78]DK.S	4YM7_2_RPA2	1	RPA2	FINPPKDK	30	126.127	120139	127.13	27948.2	130060	19163.6	0.147344	6.78684	2.76274
				0	0.891962	JL033021_040221_RPA2HFH_Q2_1to5_50B.10385.10385.4	N	4.0915	0.155269		//11	9//44	2.2645	1.1875	R.YNPLEK[1364.79]RD.-	4YM7_10_RPB10	1	RPB10	YNPLEKRD		//10	9//35	1.827	1.5	R.FINPPK[1440.78]DK.S	4YM7_2_RPA2	1	RPA2	FINPPKDK	30	126.127	48442.5	127.13	168204	51166.3	175896	3.43773	0.29089	-1.78146
	4	RPA2:1061---RPB10:59	1.56525
				-141	27.5326	JL033021_040221_RPA2HFH_Q2_10to1_1ug.17862.17862.5	P	1.56525	0.046221	0.564	//18	5//118	0.28075	0.21875	R.STGPVNSLTM[147.04]QPVK[2009.14]GR.K	4YM7_2_RPA2	1	RPA2	STGPVNSLTMQPVKGR	1061	//17	8//110	1.2845	0.535714	R.M[147.04]ILTHVDLIEK[1953.04]FLR.Y	4YM7_10_RPB10	1	RPB10	MILTHVDLIEKFLR	59	126.127	90582.1	127.13	16467.8	98099.6	9514.78	0.096991	10.3102	3.36601
	5	RPA2:930---RPB10:42	10.0813
				-144	17.2278	JL033021_040221_RPA2HFH_Q2_5to1_100B.20023.20023.5	P	10.0813	0.318171	0.556	//16	31//243	9.97725	1.60714	R.K[1490.78]WPTIDMPFSETGIQPDIIINPHAFPSR.M	4YM7_2_RPA2	1	RPA2	KWPTIDMPFSETGIQPDIIINPHAFPSR	930	//11	2//59	0.104	0.111111	R.LGLK[3472.79]RYC[160.03]C[160.03]R.R	4YM7_10_RPB10	1	RPB10	LGLKRYCCR	42	126.127	34826.6	127.13	8971.52	37695.4	6487.23	0.172096	5.81071	2.53871
	6	RPA2:740---RPB10:59	7.44425
				0	0.330214	JL033021_040221_RPA2HFH_Q2_2to1_100B.19190.19190.5	N	7.44425	0.237426		//16	15//100	6.32225	1.61538	R.M[147.04]ILTHVDLIEK[1301.72]FLR.Y	4YM7_10_RPB10	1	RPB10	MILTHVDLIEKFLR	59	//9	3//35	1.122	0.666667	R.SDNK[2150.24]LYR.L	4YM7_2_RPA2	1	RPA2	SDNKLYR	740	126.127	51885.4	127.13	26497.5	56052.6	23736.4	0.423466	2.36146	1.23968
				0	4.27367	JL033021_040221_RPA2HFH_Q2_1to2_1ug.18017.18017.5	N	7.3935	0.260115		//16	15//100	6.098	1.61538	R.M[147.04]ILTHVDLIEK[1301.73]FLR.Y	4YM7_10_RPB10	1	RPB10	MILTHVDLIEKFLR	59	//9	5//35	1.2955	0.833333	R.SDNK[2150.25]LYR.L	4YM7_2_RPA2	1	RPA2	SDNKLYR	740	126.127	32674.3	127.13	45129.5	35067.3	45426.7	1.29542	0.771953	-0.373416
				0	0.330214	JL033021_040221_RPA2HFH_Q2_1to1_1ug.17897.17897.5	N	7.21525	0.241608		//16	14//100	6.19975	1.57692	R.M[147.04]ILTHVDLIEK[1301.72]FLR.Y	4YM7_10_RPB10	1	RPB10	MILTHVDLIEKFLR	59	//9	4//35	1.0155	0.75	R.SDNK[2150.24]LYR.L	4YM7_2_RPA2	1	RPA2	SDNKLYR	740	126.127	54477.7	127.131	45642.6	58708.2	44019.1	0.749795	1.3337	0.415432
				-1	0.334775	JL033021_040221_RPA2HFH_Q2_1to2_1ug.18013.18013.5	N	6.6945	0.23605		//16	15//100	5.65675	1.53846	R.M[147.04]ILTHVDLIEK[1301.72]FLR.Y	4YM7_10_RPB10	1	RPB10	MILTHVDLIEKFLR	59	//9	4//35	1.03775	0.75	R.SDNK[2150.24]LYR.L	4YM7_2_RPA2	1	RPA2	SDNKLYR	740	126.127	31627.2	127.13	45152.5	33931.5	45545.3	1.34227	0.745005	-0.424678
				-142	36.6201	JL033021_040221_RPA2HFH_Q2_1to2_100B.19454.19454.5	NP	1.398	0.0506338	0.443	//17	3//114	0.325	0.178571	R.M[147.04]ILTHVDLIEK[1160.62]FLR.Y	4YM7_10_RPB10	1	RPB10	MILTHVDLIEKFLR	59	//9	3//38	1.073	0.571429	R.SDNK[2009.14]LYR.L	4YM7_2_RPA2	1	RPA2	SDNKLYR	740	126.127	24230.9	127.13	40066.7	25951.8	40759.4	1.57058	0.636707	-0.651298
				-141	41.3261	JL033021_040221_RPA2HFH_Q2_2to1_1ug.17921.17921.5	P	1.0695	0.036338	0.106	//17	6//114	0.375	0.285714	R.M[147.04]ILTHVDLIEK[1160.62]FLR.Y	4YM7_10_RPB10	1	RPB10	MILTHVDLIEKFLR	59	//9	4//38	0.6945	0.642857	R.SDNK[2009.14]LYR.L	4YM7_2_RPA2	1	RPA2	SDNKLYR	740	126.127	92821.9	127.13	44985.8	100297	39873.1	0.397552	2.5154	1.33079
				-141	38.9339	JL033021_040221_RPA2HFH_Q2_1to2_D.19382.19382.4	P	0.982	0.0339628	0.00175	//17	4//89	0.922	0.321429	R.M[147.04]ILTHVDLIEK[1160.62]FLR.Y	4YM7_10_RPB10	1	RPB10	MILTHVDLIEKFLR	59	//9	1//31	0.06	0.0714286	R.SDNK[2009.14]LYR.L	4YM7_2_RPA2	1	RPA2	SDNKLYR	740	126.127	25168.8	127.13	39941.8	26970	40541.5	1.50321	0.665244	-0.588045
				-141	38.1375	JL033021_040221_RPA2HFH_Q2_2to1_D.19006.19006.5	P	0.9375	0.0421557	3.58e-05	//17	3//114	0.1445	0.107143	R.M[147.04]ILTHVDLIEK[1160.62]FLR.Y	4YM7_10_RPB10	1	RPB10	MILTHVDLIEKFLR	59	//9	3//38	0.793	0.571429	R.SDNK[2009.14]LYR.L	4YM7_2_RPA2	1	RPA2	SDNKLYR	740	126.126	31921.7	127.13	14208.8	34502.6	12360.2	0.358239	2.79143	1.48101
				-143	39.8308	JL033021_040221_RPA2HFH_Q2_1to5_D.19945.19945.5	P	0.8435	0.0314651	0.423	//17	2//114	0.1455	0.0714286	R.M[147.04]ILTHVDLIEK[1160.62]FLR.Y	4YM7_10_RPB10	1	RPB10	MILTHVDLIEKFLR	59	//9	3//38	0.698	0.571429	R.SDNK[2009.14]LYR.L	4YM7_2_RPA2	1	RPA2	SDNKLYR	740	126.127	10810.1	127.13	32805.9	11456.4	34183.7	2.98382	0.335141	-1.57716
				-142	37.2798	JL033021_040221_RPA2HFH_Q2_2to1_D.18949.18949.5	P	0.74125	0.0307356	4.68e-05	//17	3//114	0.198	0.178571	R.M[147.04]ILTHVDLIEK[1160.62]FLR.Y	4YM7_10_RPB10	1	RPB10	MILTHVDLIEKFLR	59	//9	4//38	0.54325	0.642857	R.SDNK[2009.14]LYR.L	4YM7_2_RPA2	1	RPA2	SDNKLYR	740	126.127	41887.6	127.13	20772.5	45256.9	18499.1	0.408757	2.44644	1.29069
				-141	37.9663	JL033021_040221_RPA2HFH_Q2_1to2_D.19485.19485.4	P	0.719	0.0278531	0.302	//17	5//89	0.54375	0.25	R.M[147.04]ILTHVDLIEK[1160.62]FLR.Y	4YM7_10_RPB10	1	RPB10	MILTHVDLIEKFLR	59	//9	2//31	0.17525	0.142857	R.SDNK[2009.14]LYR.L	4YM7_2_RPA2	1	RPA2	SDNKLYR	740	126.127	24335.8	127.13	37437.3	26086.9	37932.4	1.45408	0.68772	-0.540106
				-141	41.8759	JL033021_040221_RPA2HFH_Q2_1to10_D.19579.19579.5	P	0.6905	0.028449	8.3e-06	//17	4//114	0.267	0.142857	R.M[147.04]ILTHVDLIEK[1160.62]FLR.Y	4YM7_10_RPB10	1	RPB10	MILTHVDLIEKFLR	59	//9	3//38	0.4235	0.357143	R.SDNK[2009.14]LYR.L	4YM7_2_RPA2	1	RPA2	SDNKLYR	740	126.126	7651.79	127.129	53134.9	7865.96	56251.5	7.15125	0.139836	-2.8382
				-141	36.2683	JL033021_040221_RPA2HFH_Q2_2to1_D.18815.18815.5	P	0.65025	0.0282668	6.09e-07	//17	2//114	0.10925	0.0714286	R.M[147.04]ILTHVDLIEK[1160.62]FLR.Y	4YM7_10_RPB10	1	RPB10	MILTHVDLIEKFLR	59	//9	3//38	0.541	0.571429	R.SDNK[2009.14]LYR.L	4YM7_2_RPA2	1	RPA2	SDNKLYR	740	126.126	34661.2	127.13	15941.8	37459.3	13971.3	0.372973	2.68116	1.42286
				-141	31.8701	JL033021_040221_RPA2HFH_Q2_1to10_100B.19996.19996.5	P	0.525	0.0185042	0.202	//17	3//114	0.0995	0.107143	R.M[147.04]ILTHVDLIEK[1160.62]FLR.Y	4YM7_10_RPB10	1	RPB10	MILTHVDLIEKFLR	59	//9	3//38	0.4255	0.571429	R.SDNK[2009.14]LYR.L	4YM7_2_RPA2	1	RPA2	SDNKLYR	740	126.127	6512.48	127.13	44082.3	6704.04	46653.1	6.95895	0.1437	-2.79887
				-142	38.0495	JL033021_040221_RPA2HFH_Q2_1to2_D.19324.19324.5	P	0.465	0.0203662	3.92e-06	//17	4//114	0.25	0.142857	R.M[147.04]ILTHVDLIEK[1160.62]FLR.Y	4YM7_10_RPB10	1	RPB10	MILTHVDLIEKFLR	59	//9	3//38	0.215	0.214286	R.SDNK[2009.14]LYR.L	4YM7_2_RPA2	1	RPA2	SDNKLYR	740	126.127	19679.6	127.131	32745.2	21075.6	33322.5	1.5811	0.632472	-0.660927
				-141	37.2578	JL033021_040221_RPA2HFH_Q2_1to2_D.19402.19402.5	P	0.405	0.0158926	2.84e-06	//17	3//114	0.1435	0.107143	R.M[147.04]ILTHVDLIEK[1160.62]FLR.Y	4YM7_10_RPB10	1	RPB10	MILTHVDLIEKFLR	59	//9	2//38	0.2615	0.142857	R.SDNK[2009.14]LYR.L	4YM7_2_RPA2	1	RPA2	SDNKLYR	740	126.127	22048	127.13	35482.3	23621.8	36042.9	1.52583	0.655381	-0.609593
				-141	40.4465	JL033021_040221_RPA2HFH_Q2_1to10_D.19401.19401.5	P	0.367	0.0152027	0.37	//17	3//114	0.18825	0.107143	R.M[147.04]ILTHVDLIEK[1160.62]FLR.Y	4YM7_10_RPB10	1	RPB10	MILTHVDLIEKFLR	59	//9	2//38	0.17875	0.142857	R.SDNK[2009.14]LYR.L	4YM7_2_RPA2	1	RPA2	SDNKLYR	740	126.127	7275.29	127.13	38544.3	7576.33	40650.3	5.36543	0.186378	-2.42369
				-141	38.3574	JL033021_040221_RPA2HFH_Q2_1to10_D.19483.19483.5	P	0.3035	0.011954	0.0025	//17	3//114	0.1175	0.107143	R.M[147.04]ILTHVDLIEK[1160.62]FLR.Y	4YM7_10_RPB10	1	RPB10	MILTHVDLIEKFLR	59	//9	2//38	0.186	0.142857	R.SDNK[2009.14]LYR.L	4YM7_2_RPA2	1	RPA2	SDNKLYR	740	126.127	7840.18	127.13	55478.5	8051.2	58745.9	7.29654	0.137051	-2.86721
	7	RPA2:120---RPB10:	4.33475
				-1	0.178272	JL033021_040221_RPA2HFH_Q2_10to1_1ug.09171.09171.4	N	4.33475	0.175802		//11	4//43	1.0755	0.5625	R.YNPLEK[1371.76]RD.-	4YM7_10_RPB10	1	RPB10	YNPLEKRD		1//9	9//41	3.25925	1.5625	R.K[1440.78]VYPSESR.Q	4YM7_2_RPA2	1	RPA2	KVYPSESR	120	126.127	116436	127.13	19228.3	126114	10152	0.0804981	12.4227	3.6349
				0	0.0501691	JL033021_040221_RPA2HFH_Q2_1to2_1ug.09274.09274.4	N	4.13125	0.187261		//11	4//43	1.09025	0.5625	R.YNPLEK[1371.76]RD.-	4YM7_10_RPB10	1	RPB10	YNPLEKRD		//9	8//41	3.041	1.3125	R.K[1440.78]VYPSESR.Q	4YM7_2_RPA2	1	RPA2	KVYPSESR	120	126.127	44503	127.13	68439.1	47705.5	69342.9	1.45356	0.687965	-0.539593
	8	RPA2:120---RPB10:68	2.8595
				-141	46.7593	JL033021_040221_RPA2HFH_Q2_1to5_50B.09106.09106.4	P	2.8595	0.138767	0.31	//10	3//42	0.24625	0.1875	R.YNPLEK[1230.66]RD.-	4YM7_10_RPB10	1	RPB10	YNPLEKRD	68	//9	8//45	2.61325	1.375	R.K[1299.68]VYPSESR.Q	4YM7_2_RPA2	1	RPA2	KVYPSESR	120	126.128	44541.9	127.131	144978	47125.1	151358	3.21183	0.311349	-1.68339
				-141	47.6736	JL033021_040221_RPA2HFH_Q2_2to1_50B.08549.08549.4	NP	2.78825	0.131036	0.000812	//10	3//42	0.27175	0.1875	R.YNPLEK[1230.66]RD.-	4YM7_10_RPB10	1	RPB10	YNPLEKRD	68	//9	6//45	2.5165	1.25	R.K[1299.68]VYPSESR.Q	4YM7_2_RPA2	1	RPA2	KVYPSESR	120	126.127	324053	127.13	147379	350227	128837	0.367868	2.71836	1.44274
				-141	44.9306	JL033021_040221_RPA2HFH_Q2_10to1_50B.09110.09110.4	P	2.247	0.0978488	0.428	//10	3//42	0.202	0.1875	R.YNPLEK[1230.66]RD.-	4YM7_10_RPB10	1	RPB10	YNPLEKRD	68	//9	7//45	2.045	1.3125	R.K[1299.68]VYPSESR.Q	4YM7_2_RPA2	1	RPA2	KVYPSESR	120	126.127	66422.7	127.13	10925.6	71944.5	5744.71	0.0798491	12.5236	3.64658
25	RPA2---RPB5
	1	RPA2:1043---RPB5:171	2.47
				-141	43.4229	JL033021_040221_RPA2HFH_Q2_5to1_100B.09703.09703.5	P	2.47	0.120717	0.214	//12	5//71	0.541	0.65	R.HM[147.04]VNDK[1235.72]FQVR.S	4YM7_2_RPA2	1	RPA2	HMVNDKFQVR	1043	//8	5//46	1.929	1	R.LK[1554.8]ESQLPR.I	4YM7_5_RPB5	1	RPB5	LKESQLPR	171	126.127	90533.9	127.13	20524.9	98014.3	13866.7	0.141476	7.06834	2.82137
	2	RPA2:930---RPB5:161	8.9815
				-141	16.8585	JL033021_040221_RPA2HFH_Q2_1to1_100B.19602.19602.5	P	8.9815	0.281565	0.345	//16	30//244	8.92725	1.14286	R.K[1505.83]WPTIDM[147.04]PFSETGIQPDIIINPHAFPSR.M	4YM7_2_RPA2	1	RPA2	KWPTIDMPFSETGIQPDIIINPHAFPSR	930	//12	1//63	0.05425	0.05	K.HIRLSSDEK[3488.78]R.E	4YM7_5_RPB5	1	RPB5	HIRLSSDEKR	161	126.127	24745.6	127.13	20915.7	26665.8	20191.3	0.757201	1.32065	0.401252
				-141	14.0429	JL033021_040221_RPA2HFH_Q2_1to1_100B.19576.19576.6	P	8.699	0.262216	0.185	//16	27//244	8.699	1.10714	R.K[1505.83]WPTIDM[147.04]PFSETGIQPDIIINPHAFPSR.M	4YM7_2_RPA2	1	RPA2	KWPTIDMPFSETGIQPDIIINPHAFPSR	930	//12	//63	0	0	K.HIRLSSDEK[3488.78]R.E	4YM7_5_RPB5	1	RPB5	HIRLSSDEKR	161	126.126	27537.4	127.13	23858.5	29669.4	23094.3	0.778386	1.28471	0.361442
				-143	12.3446	JL033021_040221_RPA2HFH_Q2_5to1_100B.19568.19568.6	P	7.83075	0.222695	0.555	//16	26//244	7.79575	1.10714	R.K[1505.83]WPTIDM[147.04]PFSETGIQPDIIINPHAFPSR.M	4YM7_2_RPA2	1	RPA2	KWPTIDMPFSETGIQPDIIINPHAFPSR	930	//12	1//63	0.035	0.05	K.HIRLSSDEK[3488.78]R.E	4YM7_5_RPB5	1	RPB5	HIRLSSDEKR	161	126.127	44964.2	127.13	11667.8	48667.4	8466.44	0.173965	5.74827	2.52313
	3	RPA2:120---RPB5:201	3.6975
				-141	56.3348	JL033021_040221_RPA2HFH_Q2_2to1_50B.04375.04375.4	NP	3.6975	0.188638	2.2e-05	//9	7//43	2.117	1.3125	R.K[1029.55]VYPSESR.Q	4YM7_2_RPA2	1	RPA2	KVYPSESR	120	//8	6//38	1.5805	1.21429	R.K[1230.66]SETSGR.Y	4YM7_5_RPB5	1	RPB5	KSETSGR	201	126.127	142137	127.131	61031.4	153646	52640.1	0.342606	2.91881	1.54538
				-141	60.3909	JL033021_040221_RPA2HFH_Q2_1to2_50B.04636.04636.4	NP	3.06725	0.147135	0.0528	//9	6//43	1.736	1.0625	R.K[1029.55]VYPSESR.Q	4YM7_2_RPA2	1	RPA2	KVYPSESR	120	//8	5//38	1.33125	0.928571	R.K[1230.66]SETSGR.Y	4YM7_5_RPB5	1	RPB5	KSETSGR	201	126.127	51279.3	127.13	73002.4	55017.1	73624.5	1.33821	0.747266	-0.420306
				-141	65.559	JL033021_040221_RPA2HFH_Q2_10to1_50B.04683.04683.4	P	2.784	0.135778	3.18e-06	//9	6//43	2.066	1.25	R.K[1029.55]VYPSESR.Q	4YM7_2_RPA2	1	RPA2	KVYPSESR	120	//8	5//38	0.718	0.714286	R.K[1230.66]SETSGR.Y	4YM7_5_RPB5	1	RPB5	KSETSGR	201	126.127	72488.2	127.131	11691.4	78516.2	6020.83	0.0766826	13.0408	3.70496
	4	RPA2:1061---RPB5:24	0.51225
				-141	35.913	JL033021_040221_RPA2HFH_Q2_5to1_50B.09901.09901.5	P	0.51225	0.0138911	0.0749	//18	5//135	0.408	0.205882	R.STGPVNSLTM[147.04]QPVK[1042.55]GRK.R	4YM7_2_RPA2	1	RPA2	STGPVNSLTMQPVKGRK	1061	//8	3//32	0.10425	0.25	K.EMVK[2081.13]DR.G	4YM7_5_RPB5	1	RPB5	EMVKDR	24	126.127	148175	127.131	39258.3	160372	28766.4	0.179373	5.57497	2.47896
	5	RPA2:1061---RPB5:201	3.82625
				0	0.0857067	JL033021_040221_RPA2HFH_Q2_1to10_50B.08015.08015.5	N	3.82625	0.158211		//18	11//119	2.026	0.766667	R.STGPVNSLTM[147.04]QPVK[1170.64]GR.K	4YM7_2_RPA2	1	RPA2	STGPVNSLTMQPVKGR	1061	//8	6//38	1.80025	1	R.K[2094.13]SETSGR.Y	4YM7_5_RPB5	1	RPB5	KSETSGR	201	126.127	22941.6	127.13	125654	23857.4	132588	5.55754	0.179936	-2.47445
				-141	41.7185	JL033021_040221_RPA2HFH_Q2_5to1_50B.08048.08048.5	P	2.3985	0.0946509	0.124	//18	8//125	0.71275	0.3125	R.STGPVNSLTM[147.04]QPVK[1029.55]GR.K	4YM7_2_RPA2	1	RPA2	STGPVNSLTMQPVKGR	1061	//8	7//41	1.68575	1.07143	R.K[1953.04]SETSGR.Y	4YM7_5_RPB5	1	RPB5	KSETSGR	201	126.127	79157.2	127.131	16784.3	85707.1	10879.6	0.126939	7.87781	2.97779
	6	RPA2:1061---RPB5:171	6.1465
				0	2.05271	JL033021_040221_RPA2HFH_Q2_1to5_50B.10200.10200.5	N	6.1465	0.227969		//18	11//117	3.431	0.866667	R.STGPVNSLTM[147.04]QPVK[1376.83]GR.K	4YM7_2_RPA2	1	RPA2	STGPVNSLTMQPVKGR	1061	//8	6//40	2.7155	1.42857	R.LK[2094.14]ESQLPR.I	4YM7_5_RPB5	1	RPB5	LKESQLPR	171	126.127	48544.1	127.13	167603	51281.3	175242	3.41727	0.292631	-1.77285
				0	2.78041	JL033021_040221_RPA2HFH_Q2_1to10_50B.10284.10284.5	N	6.128	0.22472		//18	14//117	3.7415	1.13333	R.STGPVNSLTM[147.04]QPVK[1376.83]GR.K	4YM7_2_RPA2	1	RPA2	STGPVNSLTMQPVKGR	1061	//8	6//40	2.3865	1.42857	R.LK[2094.14]ESQLPR.I	4YM7_5_RPB5	1	RPB5	LKESQLPR	171	126.127	23544.3	127.13	146804	24339.1	155199	6.37655	0.156825	-2.67278
				0	2.88437	JL033021_040221_RPA2HFH_Q2_2to1_50B.09752.09752.5	N	5.98575	0.218474		//18	14//117	3.24475	1.13333	R.STGPVNSLTM[147.04]QPVK[1376.83]GR.K	4YM7_2_RPA2	1	RPA2	STGPVNSLTMQPVKGR	1061	//8	6//40	2.741	1.42857	R.LK[2094.14]ESQLPR.I	4YM7_5_RPB5	1	RPB5	LKESQLPR	171	126.127	256892	127.13	115061	277656	100236	0.361006	2.77004	1.4699
				0	4.13184	JL033021_040221_RPA2HFH_Q2_1to2_50B.10064.10064.5	N	5.81875	0.210166		//18	14//117	3.07375	1.03333	R.STGPVNSLTM[147.04]QPVK[1376.83]GR.K	4YM7_2_RPA2	1	RPA2	STGPVNSLTMQPVKGR	1061	//8	7//40	2.745	1.5	R.LK[2094.15]ESQLPR.I	4YM7_5_RPB5	1	RPB5	LKESQLPR	171	126.127	78754.4	127.13	124456	84394.4	126295	1.49648	0.668234	-0.581576
				0	4.96349	JL033021_040221_RPA2HFH_Q2_1to5_1ug.10436.10436.5	N	5.25425	0.210587		//18	10//117	2.80075	0.766667	R.STGPVNSLTM[147.04]QPVK[1376.84]GR.K	4YM7_2_RPA2	1	RPA2	STGPVNSLTMQPVKGR	1061	//8	6//40	2.4535	1.42857	R.LK[2094.15]ESQLPR.I	4YM7_5_RPB5	1	RPB5	LKESQLPR	171	126.127	15552.6	127.13	59064.3	16386	61896	3.77738	0.264733	-1.91739
				-1	1.75603	JL033021_040221_RPA2HFH_Q2_5to1_50B.10474.10474.5	N	4.78325	0.199074		//18	11//117	2.85125	0.733333	R.STGPVNSLTM[147.04]QPVK[1376.82]GR.K	4YM7_2_RPA2	1	RPA2	STGPVNSLTMQPVKGR	1061	//8	6//40	1.932	1.42857	R.LK[2094.13]ESQLPR.I	4YM7_5_RPB5	1	RPB5	LKESQLPR	171	126.127	85467.2	127.13	23717.2	92493.7	17742.3	0.191822	5.21316	2.38216
				-141	37.5431	JL033021_040221_RPA2HFH_Q2_1to1_50B.10473.10473.5	NP	3.25075	0.137487	1.54e-06	//18	8//123	0.53875	0.3125	R.STGPVNSLTM[147.04]QPVK[1235.72]GR.K	4YM7_2_RPA2	1	RPA2	STGPVNSLTMQPVKGR	1061	//8	6//43	2.712	1.25	R.LK[1953.04]ESQLPR.I	4YM7_5_RPB5	1	RPB5	LKESQLPR	171	126.127	44755.2	127.13	43644.2	48180.7	42750.5	0.887296	1.12702	0.172513
				-141	36.8878	JL033021_040221_RPA2HFH_Q2_10to1_50B.10427.10427.5	NP	3.20125	0.13458	0.00798	//18	7//123	0.50975	0.28125	R.STGPVNSLTM[147.04]QPVK[1235.72]GR.K	4YM7_2_RPA2	1	RPA2	STGPVNSLTMQPVKGR	1061	//8	6//43	2.6915	1.25	R.LK[1953.04]ESQLPR.I	4YM7_5_RPB5	1	RPB5	LKESQLPR	171	126.127	64455.4	127.13	12585.6	69797.6	7700.1	0.11032	9.06451	3.18023
				-141	39.9456	JL033021_040221_RPA2HFH_Q2_10to1_50B.10420.10420.5	NP	3.15425	0.127858	5.68e-06	//18	7//123	0.30975	0.28125	R.STGPVNSLTM[147.04]QPVK[1235.72]GR.K	4YM7_2_RPA2	1	RPA2	STGPVNSLTMQPVKGR	1061	//8	6//43	2.8445	1.25	R.LK[1953.04]ESQLPR.I	4YM7_5_RPB5	1	RPB5	LKESQLPR	171	126.127	67197.2	127.13	12218.2	72774	7060.37	0.0970178	10.3074	3.36561
				-141	35.905	JL033021_040221_RPA2HFH_Q2_2to1_1ug.10465.10465.5	NP	2.9345	0.112978	0.605	//18	5//123	0.354	0.15625	R.STGPVNSLTM[147.04]QPVK[1235.72]GR.K	4YM7_2_RPA2	1	RPA2	STGPVNSLTMQPVKGR	1061	//8	6//43	2.5805	1.25	R.LK[1953.04]ESQLPR.I	4YM7_5_RPB5	1	RPB5	LKESQLPR	171	126.127	74727.6	127.13	38069.3	80730.2	34085.8	0.422219	2.36844	1.24394
				-141	39.0719	JL033021_040221_RPA2HFH_Q2_5to1_50B.10403.10403.5	NP	2.85875	0.117188	0.246	//18	5//123	0.33825	0.21875	R.STGPVNSLTM[147.04]QPVK[1235.72]GR.K	4YM7_2_RPA2	1	RPA2	STGPVNSLTMQPVKGR	1061	//8	6//43	2.5205	1.25	R.LK[1953.04]ESQLPR.I	4YM7_5_RPB5	1	RPB5	LKESQLPR	171	126.127	95321.7	127.13	23354	103183	16468.4	0.159603	6.26555	2.64744
				-141	36.3418	JL033021_040221_RPA2HFH_Q2_1to10_1ug.10506.10506.5	NP	1.8865	0.0715654	0.279	//18	4//123	0.2265	0.125	R.STGPVNSLTM[147.04]QPVK[1235.72]GR.K	4YM7_2_RPA2	1	RPA2	STGPVNSLTMQPVKGR	1061	//8	5//43	1.66	1	R.LK[1953.04]ESQLPR.I	4YM7_5_RPB5	1	RPB5	LKESQLPR	171	126.127	10804.1	127.13	72617	11126.1	76845.1	6.90673	0.144786	-2.788
	7	RPA2:1061---RPB5:197	5.639
				0	13.2326	JL033021_040221_RPA2HFH_Q2_1to2_50B.10785.10785.4	N	5.639	0.17479		//18	18//91	4.62175	1.4	R.STGPVNSLTM[147.04]QPVK[1475.9]GR.K	4YM7_2_RPA2	1	RPA2	STGPVNSLTMQPVKGR	1061	//11	5//39	1.01725	0.5625	K.RGEVVK[2094.09]IIR.K	4YM7_5_RPB5	1	RPB5	RGEVVKIIR	197	126.127	97758.7	127.13	161620	104702	164413	1.57029	0.636823	-0.651035
				0	9.45136	JL033021_040221_RPA2HFH_Q2_2to1_50B.10526.10526.4	N	5.582	0.163494		//18	15//91	4.50825	1.2	R.STGPVNSLTM[147.04]QPVK[1475.91]GR.K	4YM7_2_RPA2	1	RPA2	STGPVNSLTMQPVKGR	1061	//11	6//39	1.07375	0.625	K.RGEVVK[2094.1]IIR.K	4YM7_5_RPB5	1	RPB5	RGEVVKIIR	197	126.127	285669	127.13	143811	308630	128460	0.416227	2.40253	1.26456
				0	3.85869	JL033021_040221_RPA2HFH_Q2_5to1_100B.11355.11355.5	N	5.19425	0.222619		//18	14//116	3.82625	1.16667	R.STGPVNSLTM[147.04]QPVK[1475.95]GR.K	4YM7_2_RPA2	1	RPA2	STGPVNSLTMQPVKGR	1061	//11	6//48	1.368	0.625	K.RGEVVK[2094.15]IIR.K	4YM7_5_RPB5	1	RPB5	RGEVVKIIR	197	126.127	80319.6	127.13	18328	86955.1	12429.5	0.142941	6.99589	2.80651
26	RPA2---RPA34
	1	RPA2:6---RPA34:158	3.32875
				-1	1.91795	JL033021_040221_RPA2HFH_Q2_2to1_50B.05972.05972.4	N	3.32875	0.15324		//11	12//44	2.23625	1.875	K.VIK[992.61]PPGQAR.T	4YM7_2_RPA2	1	RPA2	VIKPPGQAR	6	//6	5//26	1.0925	1	R.K[1371.84]DVPK.V	4YM7_14_RPA34	1	RPA34	KDVPK	158	126.127	344456	127.13	146240	372363	125786	0.337804	2.9603	1.56574
				0	2.79329	JL033021_040221_RPA2HFH_Q2_1to5_50B.06361.06361.4	N	3.1905	0.165311		//11	12//44	2.1715	1.875	K.VIK[992.61]PPGQAR.T	4YM7_2_RPA2	1	RPA2	VIKPPGQAR	6	//6	5//26	1.019	1	R.K[1371.85]DVPK.V	4YM7_14_RPA34	1	RPA34	KDVPK	158	126.127	96848.6	127.13	322529	102406	336922	3.29006	0.303946	-1.71811
				0	3.5274	JL033021_040221_RPA2HFH_Q2_1to10_50B.06412.06412.4	N	3.12	0.176326		//11	12//44	2.14625	1.875	K.VIK[992.62]PPGQAR.T	4YM7_2_RPA2	1	RPA2	VIKPPGQAR	6	1//6	6//26	0.97375	1.1	R.K[1371.85]DVPK.V	4YM7_14_RPA34	1	RPA34	KDVPK	158	126.127	59008	127.13	362111	61047.2	382734	6.26948	0.159503	-2.64835
				0	3.39392	JL033021_040221_RPA2HFH_Q2_5to1_50B.06367.06367.4	N	3.06	0.153838		//11	10//44	1.9835	1.5	K.VIK[992.62]PPGQAR.T	4YM7_2_RPA2	1	RPA2	VIKPPGQAR	6	//6	5//26	1.0765	1	R.K[1371.85]DVPK.V	4YM7_14_RPA34	1	RPA34	KDVPK	158	126.127	207033	127.13	49202.2	224121	34138.3	0.152321	6.56509	2.71481
				0	1.59201	JL033021_040221_RPA2HFH_Q2_1to1_50B.06475.06475.4	N	2.94075	0.162765		//11	11//44	1.96775	1.6875	K.VIK[992.61]PPGQAR.T	4YM7_2_RPA2	1	RPA2	VIKPPGQAR	6	//6	5//26	0.973	1	R.K[1371.85]DVPK.V	4YM7_14_RPA34	1	RPA34	KDVPK	158	126.127	177766	127.13	167383	191421	163406	0.853647	1.17144	0.228288
				0	1.79222	JL033021_040221_RPA2HFH_Q2_10to1_50B.06396.06396.4	N	2.92975	0.167726		//11	12//44	1.9835	1.875	K.VIK[992.61]PPGQAR.T	4YM7_2_RPA2	1	RPA2	VIKPPGQAR	6	//6	5//26	0.94625	1	R.K[1371.85]DVPK.V	4YM7_14_RPA34	1	RPA34	KDVPK	158	126.127	428902	127.13	84345.7	464445	51879.5	0.111702	8.95237	3.16227
				0	3.26045	JL033021_040221_RPA2HFH_Q2_1to2_50B.06323.06323.4	N	2.91225	0.153369		//11	11//44	1.95625	1.6875	K.VIK[992.62]PPGQAR.T	4YM7_2_RPA2	1	RPA2	VIKPPGQAR	6	//6	5//26	0.956	1	R.K[1371.85]DVPK.V	4YM7_14_RPA34	1	RPA34	KDVPK	158	126.127	272269	127.13	455760	291561	463942	1.59124	0.628442	-0.670148
				0	3.59414	JL033021_040221_RPA2HFH_Q2_10to1_50B.06359.06359.4	N	2.796	0.15663		//11	10//44	1.828	1.5	K.VIK[992.62]PPGQAR.T	4YM7_2_RPA2	1	RPA2	VIKPPGQAR	6	//6	5//26	0.968	1	R.K[1371.85]DVPK.V	4YM7_14_RPA34	1	RPA34	KDVPK	158	126.127	197222	127.13	33426.7	213610	18114.2	0.0848005	11.7924	3.55978
	2	RPA2:805---RPA34:218	0.7515
				-441	96.1634	JL033021_040221_RPA2HFH_Q2_1to2_D.14788.14788.4	P	0.7515	0.0273203	0.186	//14	6//70	0.7515	0.458333	R.GFGYGTM[147.04]YK[1064.63]TEK.V	4YM7_2_RPA2	1	RPA2	GFGYGTMYKTEK	805	//9	//31	0	0	R.E[111.03]K[1662.8]REKK.D	4YM7_14_RPA34	1	RPA34	EKREKK	218	126.127	16069.1	127.13	28231.7	17196.9	28810	1.6753	0.596907	-0.744423
	3	RPA2:106---RPA34:49	6.578
				-1	17.0714	JL033021_040221_RPA2HFH_Q2_2to1_50B.12244.12244.4	N	6.578	0.167584		//16	20//146	5.48	1.14583	K.LSVSVEQVSIAK[1647.92]PMSNDGVSSAVER.K	4YM7_2_RPA2	1	RPA2	LSVSVEQVSIAKPMSNDGVSSAVER	106	1//10	5//46	1.098	0.555556	K.AK[2995.5]QQQVWLIK.F	4YM7_14_RPA34	1	RPA34	AKQQQVWLIK	49	126.127	92940.4	127.131	44033.2	100433	38841.7	0.386743	2.5857	1.37055
27	RPA2---RPA49
	1	RPA2:77---RPA49:246	14.1625
				0	11.1666	JL033021_040221_RPA2HFH_Q2_1to2_50B.13908.13908.5	N	14.1625	0.36882		3//16	37//179	13.0117	2.34091	K.VIFDGK[1899.07]PLNSEDEISNSGYLGNK.L	4YM7_2_RPA2	1	RPA2	VIFDGKPLNSEDEISNSGYLGNK	77	2//14	13//90	1.15075	0.730769	K.K[2902.53]LDSLTQPSQM[147.04]TK.L	4YM7_13_RPA49	1	RPA49	KLDSLTQPSQMTK	246	126.127	294930	127.13	775996	313531	805066	2.56774	0.389447	-1.3605
				0	12.1681	JL033021_040221_RPA2HFH_Q2_5to1_50B.14338.14338.5	N	13.659	0.373554		2//16	34//179	12.5495	2.09091	K.VIFDGK[1899.07]PLNSEDEISNSGYLGNK.L	4YM7_2_RPA2	1	RPA2	VIFDGKPLNSEDEISNSGYLGNK	77	2//14	11//90	1.1095	0.576923	K.K[2902.53]LDSLTQPSQM[147.04]TK.L	4YM7_13_RPA49	1	RPA49	KLDSLTQPSQMTK	246	126.127	240976	127.13	87107.9	260623	71710.1	0.275149	3.63439	1.86171
Total inter crosslinks are: 93
