# Supplementary material for: Isobaric crosslinking mass spectrometry technology for studying conformational and structural changes in proteins and complexes
Source: eLife. 2024 Nov 14;13:RP99809. doi: 10.7554/eLife.99809 (PMC11563578; doi:10.7554/eLife.99809)
Supplement: Figure 3—source data 1. — The information includes the peptide sequences and protein names, sites of Qlinker modification, score, search engine (N = Nexus, P = pLink2), reporter ion intensities, and reporter ion ratios. [file elife-99809-fig3-data1.xlsx]

## Sheet: ABP-127-inter
index	Protein-protein	Crosslinkingsites	Xcorr	Ratio	126/127Ratio	Da	ppm	spectrum	engine	xcorr	Xcorr_norm	expect	immonium1	ion1	dot1	connective1	peptide1	protein1	Unique_protein1	subunit1	realpep1	position1	immonium2	ion2	dot2	connective2	peptide2	protein2	Unique_protein2	subunit2	realpep2	position2	Q2link0mz	Q2link0intensity	Q2link1mz	Q2link1intensity	MaxIntensity	corrected_126	Corrected_127	ratio127/126	log2ratio127/126	adjustedLog2127/126
1	TBP---TFIIA1
	1	TBP:133---TFIIA1:194	6.39125	-0.068259	0.068259
						0	1.52677	JL121323_121323_ABP_127_1ug.07048.07048.4	NP	6.39125	0.284093	5.78e-07	//12	11//45	3.3905	1.6	K.SEDDSK[1536.86]LASR.K	Spt15	1	TBP	SEDDSKLASR	133	//9	12//42	3.00075	1.66667	K.EK[1513.78]EQIEQVK.L	Toa1	1	TFIIA1	EKEQIEQVK	194	126.127	41717.3	127.131	39362.7	41717.3	45540.6	43436.1	0.953788	-0.068259	-0.068259
	2	TBP:97---TFIIA1:44	4.35225	-0.0259343	0.0259343
						0	1.87413	JL121323_121323_ABP_127_1ug.07787.07787.4	P	4.35225	0.150908	0.638	1//10	8//39	2.889	1.3125	R.NAEYNPK[1222.73]R.F	Spt15	1	TBP	NAEYNPKR	97	//8	8//27	1.46325	1.41667	K.NIWQK[1397.75]K.L	Toa1	1	TFIIA1	NIWQKK	44	126.128	141137	127.131	137093	185659	154024	151280	0.982184	-0.0259343	-0.0259343
	3	TBP:145---TFIIA1:255	5.3675	-0.0396421	0.0396421
						0	2.35725	JL121323_121323_ABP_127_30B.07620.07620.3	P	5.3675	0.184885	0.5	//12	17//42	4.796	2.6	R.IIQK[881.55]IGFAAK.F	Spt15	1	TBP	IIQKIGFAAK	145	//4	4//13	0.5715	1	R.TK[1494.94]AR.W	Toa1	1	TFIIA1	TKAR	255	126.127	249858	127.131	240428	1.30204e+06	272700	265309	0.972896	-0.0396421	-0.0396421
	4	TBP:110---TFIIA1:255	5.94325	0.226243	-0.226243
						0	-0.331336	JL121323_121323_ABP_127_30B.08717.08717.4	P	5.94325	0.255497	0.0513	//15	16//73	5.89325	1.76923	R.EPK[881.55]TTALIFASGK.M	Spt15	1	TBP	EPKTTALIFASGK	110	//4	2//17	0.05	0.25	R.TK[1769.02]AR.W	Toa1	1	TFIIA1	TKAR	255	126.128	136981	127.131	143179	169316	149365	157996	1.05778	0.0810405	0.0810405
						526	-155.798	JL121323_121323_ABP_127_30B.08739.08739.3	P	5.6875	0.239443	0.335	//15	13//59	5.60725	1.57692	R.EPK[881.55]TTALIFASGK.M	Spt15	1	TBP	EPKTTALIFASGK	110	1//4	2//13	0.08025	0.25	R.TK[1769.02]AR.W	Toa1	1	TFIIA1	TKAR	255	126.128	184130	127.131	234775	336113	200263	259070	1.29365	0.371446	0.371446
	5	TBP:15---TFIIA1:2	5.3095	-0.253289	0.253289
						-3	19.2626	JL121323_121323_ABP_127_70B.15041.15041.5	N	4.65175	0.206112		//13	13//112	3.50575	1.26923	K.E[111.03]FK[1140.66]EANK[425.27]IVFDPNTR.Q	Spt15	1	TBP	EFKEANKIVFDPNTR	15	//	6//26	1.146	0.708333	M.S[2452.35]NAEASR.V	Toa1	1	TFIIA1	SNAEASR	2	126.128	182423	127.131	170519	374146	199161	188165	0.944789	-0.0819363	-0.0819363
	6	TBP:83---TFIIA1:44	9.23	-0.166794	0.166794
						-2	4.39981	JL121323_121323_ABP_127_30B.27989.27989.7	NP	9.23	0.292089	0.191	//13	21//187	6.07575	1.1087	R.EDFENAGIDEQTLQDLK[425.27]NIWQK[1643]K.L	Toa1	1	TFIIA1	EDFENAGIDEQTLQDLKNIWQKK	44	1//13	9//62	3.15425	1.18182	R.LDLK[3465.79]TVALHAR.N	Spt15	1	TBP	LDLKTVALHAR	83	126.127	133662	127.131	114826	588457	146049	126709	0.867577	-0.204936	-0.204936
						-2	3.28169	JL121323_121323_ABP_127_30B.27986.27986.6	P	7.9695	0.235781	0.103	//13	20//187	6.74075	1.04348	R.EDFENAGIDEQTLQDLK[425.27]NIWQK[1643]K.L	Toa1	1	TFIIA1	EDFENAGIDEQTLQDLKNIWQKK	44	//13	5//62	1.22875	0.454545	R.LDLK[3465.79]TVALHAR.N	Spt15	1	TBP	LDLKTVALHAR	83	126.128	240078	127.131	219355	297462	262168	242055	0.923282	-0.115157	-0.115157
						0	2.24945	JL121323_121323_ABP_127_30B.12562.12562.4	P	7.3755	0.299318	0.55	//13	19//56	6.7865	2.54545	R.LDLK[1222.73]TVALHAR.N	Spt15	1	TBP	LDLKTVALHAR	83	//8	5//25	0.589	0.583333	K.NIWQK[1643]K.L	Toa1	1	TFIIA1	NIWQKK	44	126.128	931905	127.131	800231	2.92821e+06	1.01827e+06	883042	0.867195	-0.205572	-0.205572
						-3	0.616761	JL121323_121323_ABP_127_30B.27970.27970.7	N	5.6255	0.190182		//13	15//136	2.39975	0.613636	R.EDFENAGIDEQTLQDLK[425.27]NIWQK[1643]K.L	Toa1	1	TFIIA1	EDFENAGIDEQTLQDLKNIWQKK	44	1//13	9//50	3.22575	1.3	R.LDLK[3465.8]TVALHAR.N	Spt15	1	TBP	LDLKTVALHAR	83	126.128	119902	127.131	97196.4	517313	131085	107255	0.818208	-0.28946	-0.28946
						0	1.41133	JL121323_121323_ABP_127_30B.12551.12551.4	P	4.43	0.190243	0.0728	//13	14//56	3.90125	1.45455	R.LDLK[1222.73]TVALHAR.N	Spt15	1	TBP	LDLKTVALHAR	83	//8	5//25	0.52875	0.583333	K.NIWQK[1643]K.L	Toa1	1	TFIIA1	NIWQKK	44	126.128	811150	127.131	731639	1.94482e+06	885900	807352	0.911335	-0.133946	-0.133946
						-1	2.17827	JL121323_121323_ABP_127_1ug.13848.13848.5	P	3.96	0.200359	0.0912	//13	14//68	3.6565	1.63636	R.LDLK[1222.73]TVALHAR.N	Spt15	1	TBP	LDLKTVALHAR	83	//8	5//31	0.3035	0.583333	K.NIWQK[1643]K.L	Toa1	1	TFIIA1	NIWQKK	44	126.128	52457	127.131	50061.8	261537	57257.7	55242.3	0.964802	-0.0516949	-0.0516949
	7	TBP:83---TFIIA1:255	3.577	-0.066494	0.066494
						495	-212.115	JL121323_121323_ABP_127_30B.08856.08856.3	P	3.577	0.160883	0.689	//13	12//47	3.49175	1.68182	R.LDLK[881.55]TVALHAR.N	Spt15	1	TBP	LDLKTVALHAR	83	//4	1//13	0.08525	0.125	R.TK[1643]AR.W	Toa1	1	TFIIA1	TKAR	255	126.128	118375	127.131	111829	237623	129222	123402	0.954956	-0.066494	-0.066494
	8	TBP:83---TFIIA1:39	13.4135	-0.0374866	0.0374866
						0	3.8599	JL121323_121323_ABP_127_30B.27996.27996.5	NP	13.4135	0.365177	4.47e-05	//15	30//175	11.1653	1.97727	R.EDFENAGIDEQTLQDLK[1643]NIWQK.K	Toa1	1	TFIIA1	EDFENAGIDEQTLQDLKNIWQK	39	//13	8//62	2.24825	1.13636	R.LDLK[3040.52]TVALHAR.N	Spt15	1	TBP	LDLKTVALHAR	83	126.128	383388	127.131	406783	654825	417978	448879	1.07393	0.1029	0.1029
						0	3.98912	JL121323_121323_ABP_127_30B.27954.27954.6	NP	10.4	0.282705	0.00433	//15	25//175	8.7485	1.70455	R.EDFENAGIDEQTLQDLK[1643]NIWQK.K	Toa1	1	TFIIA1	EDFENAGIDEQTLQDLKNIWQK	39	//13	7//62	1.6515	0.818182	R.LDLK[3040.52]TVALHAR.N	Spt15	1	TBP	LDLKTVALHAR	83	126.128	184897	127.131	162684	427787	201986	179519	0.888773	-0.170114	-0.170114
						-1	3.22401	JL121323_121323_ABP_127_30B.28078.28078.6	NP	8.80675	0.269637	0.00268	//15	23//175	6.427	1.31818	R.EDFENAGIDEQTLQDLK[1643]NIWQK.K	Toa1	1	TFIIA1	EDFENAGIDEQTLQDLKNIWQK	39	//13	8//62	2.37975	1.13636	R.LDLK[3040.52]TVALHAR.N	Spt15	1	TBP	LDLKTVALHAR	83	126.127	133928	127.131	113119	238989	146363	124825	0.852843	-0.229649	-0.229649
						-1	-2.15803	JL121323_121323_ABP_127_30B.27949.27949.5	NP	7.6305	0.239441	0.00299	//15	22//175	6.113	1.29545	R.EDFENAGIDEQTLQDLK[1643]NIWQK.K	Toa1	1	TFIIA1	EDFENAGIDEQTLQDLKNIWQK	39	//13	5//62	1.5175	0.590909	R.LDLK[3040.52]TVALHAR.N	Spt15	1	TBP	LDLKTVALHAR	83	126.128	279313	127.131	294982	294982	304529	325507	1.06889	0.0961087	0.0961087
						2074	-16.3357	JL121323_121323_ABP_127_30B.27945.27945.3	P	3.78175	0.11012	0.00581	//15	10//85	2.2065	0.659091	R.EDFENAGIDEQTLQDLK[1643]NIWQK.K	Toa1	1	TFIIA1	EDFENAGIDEQTLQDLKNIWQK	39	//13	6//38	1.57525	0.636364	R.LDLK[3040.52]TVALHAR.N	Spt15	1	TBP	LDLKTVALHAR	83	126.128	351525	127.131	350769	405262	383510	387067	1.00928	0.0133205	0.0133205
	9	TBP:35---TFIIA1:259	10.0105	-0.289032	0.289032
						0	4.16077	JL121323_121323_ABP_127_30B.08529.08529.4	NP	10.0105	0.359411	0.0368	//19	25//102	9.1025	2.17647	R.DGTK[1227.69]PATTFQSEEDIKR.A	Spt15	1	TBP	DGTKPATTFQSEEDIKR	35	//6	4//23	0.908	1	R.WK[2329.2]C[160.03]SLK.D	Toa1	1	TFIIA1	WKCSLK	259	126.128	373540	127.131	302892	1.01904e+06	408377	334237	0.818451	-0.289032	-0.289032
	10	TBP:35---TFIIA1:255	10.0862	-0.241319	0.241319
						0	2.88501	JL121323_121323_ABP_127_30B.06600.06600.5	P	10.0862	0.437914	0.667	//19	28//132	9.80875	2.47059	R.DGTK[881.55]PATTFQSEEDIKR.A	Spt15	1	TBP	DGTKPATTFQSEEDIKR	35	//4	2//19	0.2775	0.5	R.TK[2329.2]AR.W	Toa1	1	TFIIA1	TKAR	255	126.128	61649.5	127.131	58500.7	153496	67295.5	64554.5	0.959269	-0.059992	-0.059992
						0	2.54281	JL121323_121323_ABP_127_30B.06441.06441.5	P	9.61425	0.375498	0.244	//19	28//132	9.545	2.38235	R.DGTK[881.55]PATTFQSEEDIKR.A	Spt15	1	TBP	DGTKPATTFQSEEDIKR	35	//4	1//19	0.06925	0.125	R.TK[2329.2]AR.W	Toa1	1	TFIIA1	TKAR	255	126.128	190716	127.131	160558	535306	208431	177173	0.850034	-0.234407	-0.234407
						0	2.62909	JL121323_121323_ABP_127_30B.06502.06502.6	P	7.66825	0.338427	0.534	//19	22//132	7.57975	1.79412	R.DGTK[881.55]PATTFQSEEDIKR.A	Spt15	1	TBP	DGTKPATTFQSEEDIKR	35	//4	1//19	0.0885	0.125	R.TK[2329.2]AR.W	Toa1	1	TFIIA1	TKAR	255	126.128	65884.2	127.131	56895	183723	71986.5	62782.7	0.872146	-0.197359	-0.197359
						0	2.65687	JL121323_121323_ABP_127_1ug.06580.06580.5	P	7.12975	0.296474	0.0327	//19	26//132	7.05275	1.82353	R.DGTK[881.55]PATTFQSEEDIKR.A	Spt15	1	TBP	DGTKPATTFQSEEDIKR	35	//4	1//19	0.077	0.125	R.TK[2329.2]AR.W	Toa1	1	TFIIA1	TKAR	255	126.128	105747	127.131	75535.4	208440	115734	83352.1	0.720206	-0.473518	-0.473518
	11	TBP:35---TFIIA1:44	12.758	0.013533	-0.013533
						0	4.56906	JL121323_121323_ABP_127_30B.09120.09120.4	P	12.758	0.466975	0.00527	//19	32//102	12.1937	2.91176	R.DGTK[1222.73]PATTFQSEEDIKR.A	Spt15	1	TBP	DGTKPATTFQSEEDIKR	35	//8	5//23	0.56425	0.583333	K.NIWQK[2329.2]K.L	Toa1	1	TFIIA1	NIWQKK	44	126.128	500859	127.131	514421	2.08803e+06	546253	567655	1.03918	0.0554458	0.0554458
						0	3.79579	JL121323_121323_ABP_127_30B.09153.09153.5	P	10.527	0.388242	0.0199	//19	31//131	9.94675	2.76471	R.DGTK[1222.73]PATTFQSEEDIKR.A	Spt15	1	TBP	DGTKPATTFQSEEDIKR	35	//8	5//29	0.58025	0.833333	K.NIWQK[2329.2]K.L	Toa1	1	TFIIA1	NIWQKK	44	126.128	416498	127.131	417675	925334	454369	460898	1.01437	0.0205832	0.0205832
						0	0.304234	JL121323_121323_ABP_127_30B.09131.09131.3	NP	8.0725	0.299926	0.292	//19	19//73	5.811	1.41176	R.DGTK[1222.73]PATTFQSEEDIKR.A	Spt15	1	TBP	DGTKPATTFQSEEDIKR	35	//8	6//17	2.2615	1.33333	K.NIWQK[2329.2]K.L	Toa1	1	TFIIA1	NIWQKK	44	126.128	173468	127.131	173917	1.00661e+06	189241	191915	1.01413	0.0202403	0.0202403
						-2	5.18046	JL121323_121323_ABP_127_30B.09195.09195.3	NP	7.298	0.276859	0.581	//19	18//73	5.227	1.17647	R.DGTK[1222.73]PATTFQSEEDIKR.A	Spt15	1	TBP	DGTKPATTFQSEEDIKR	35	//8	7//17	2.071	1.41667	K.NIWQK[2329.2]K.L	Toa1	1	TFIIA1	NIWQKK	44	126.127	147232	127.131	141433	669191	160695	156069	0.971215	-0.0421374	-0.0421374
	12	TBP:35---TFIIA1:45	13.913	0.0680416	-0.0680416
						0	2.59579	JL121323_121323_ABP_127_30B.07159.07159.4	NP	13.913	0.507181	5.27e-05	//19	33//103	12.981	3.02941	R.DGTK[1125.68]PATTFQSEEDIKR.A	Spt15	1	TBP	DGTKPATTFQSEEDIKR	35	//7	7//26	0.932	1.08333	K.K[2329.2]LTETK.V	Toa1	1	TFIIA1	KLTETK	45	126.128	50613.9	127.131	55436.4	431477	55159.2	61173.2	1.10903	0.149296	0.149296
						0	1.40871	JL121323_121323_ABP_127_30B.07162.07162.3	NP	10.3722	0.55526	0.00299	//19	22//74	8.822	1.79412	R.DGTK[1125.68]PATTFQSEEDIKR.A	Spt15	1	TBP	DGTKPATTFQSEEDIKR	35	//7	6//19	1.55025	1.16667	K.K[2329.2]LTETK.V	Toa1	1	TFIIA1	KLTETK	45	126.127	32553	127.131	31897.3	477882	35522	35198.2	0.990883	-0.0132128	-0.0132128
2	TBP---TFIIA2
	1	TBP:83---TFIIA2:53	7.799	-0.0402732	0.0402732
						0	6.90019	JL121323_121323_ABP_127_30B.11467.11467.4	NP	7.799	0.259422	0.00214	//15	16//66	4.49125	1.88462	K.VVAETLK[1643]DNTQSK.L	Toa2	1	TFIIA2	VVAETLKDNTQSK	53	//13	12//50	3.30775	1.36364	R.LDLK[1839.02]TVALHAR.N	Spt15	1	TBP	LDLKTVALHAR	83	126.128	1.08896e+06	127.131	1.04741e+06	1.08896e+06	1.18851e+06	1.1558e+06	0.972471	-0.0402732	-0.0402732
	2	TBP:83---TFIIA2:110	10.0515	-0.264474	0.264474
						-1	4.19989	JL121323_121323_ABP_127_30B.17791.17791.5	N	10.0515	0.312848		//21	18//155	7.7335	1.31579	R.DASQNGSGDSQSVISVDK[1642.98]LR.I	Toa2	1	TFIIA2	DASQNGSGDSQSVISVDKLR	110	1//13	9//62	2.318	1.3	R.LDLK[2469.24]TVALHAR.N	Spt15	1	TBP	LDLKTVALHAR	83	126.127	987610	127.13	752019	1381816	1.08031e+06	829840	0.768151	-0.380538	-0.380538
						-2	4.60537	JL121323_121323_ABP_127_30B.16835.16835.6	NP	9.8275	0.353972	0.0734	//21	22//155	7.60325	1.675	R.DASQNGSGDSQSVISVDK[1643]LR.I	Toa2	1	TFIIA2	DASQNGSGDSQSVISVDKLR	110	1//13	8//62	2.22425	1	R.LDLK[2469.25]TVALHAR.N	Spt15	1	TBP	LDLKTVALHAR	83	126.128	278746	127.131	233380	949038	304653	257531	0.845323	-0.242425	-0.242425
						-2	7.63405	JL121323_121323_ABP_127_30B.17714.17714.6	N	8.49175	0.299037		1//21	15//119	5.7615	1.05263	R.DASQNGSGDSQSVISVDK[1642.97]LR.I	Toa2	1	TFIIA2	DASQNGSGDSQSVISVDKLR	110	1//13	8//50	2.73025	1.1	R.LDLK[2469.23]TVALHAR.N	Spt15	1	TBP	LDLKTVALHAR	83	126.128	223009	127.131	189644	956092	243700	209270	0.858718	-0.219744	-0.219744
						-1	5.49268	JL121323_121323_ABP_127_30B.16881.16881.6	NP	8.095	0.310266	0.167	//21	20//155	5.8965	1.4	R.DASQNGSGDSQSVISVDK[1643]LR.I	Toa2	1	TFIIA2	DASQNGSGDSQSVISVDKLR	110	//13	8//62	2.1985	1.09091	R.LDLK[2469.25]TVALHAR.N	Spt15	1	TBP	LDLKTVALHAR	83	126.128	305338	127.131	236011	793027	333955	260434	0.779847	-0.358738	-0.358738
						-1	1.84945	JL121323_121323_ABP_127_30B.17720.17720.6	N	7.934	0.275128		1//21	14//119	5.00875	1.02632	R.DASQNGSGDSQSVISVDK[1642.99]LR.I	Toa2	1	TFIIA2	DASQNGSGDSQSVISVDKLR	110	1//13	10//50	2.92525	1.45	R.LDLK[2469.25]TVALHAR.N	Spt15	1	TBP	LDLKTVALHAR	83	126.128	208921	127.131	179787	754095	228279	198392	0.869076	-0.202445	-0.202445
						0	5.23888	JL121323_121323_ABP_127_30B.16815.16815.5	N	7.57875	0.224068		//21	18//155	6.2875	1.39474	R.DASQNGSGDSQSVISVDK[1643.01]LR.I	Toa2	1	TFIIA2	DASQNGSGDSQSVISVDKLR	110	1//13	7//62	1.29125	0.6	R.LDLK[2469.27]TVALHAR.N	Spt15	1	TBP	LDLKTVALHAR	83	126.127	1.22865e+06	127.131	1.00837e+06	1816620	1.34309e+06	1.11272e+06	0.828478	-0.271464	-0.271464
						1788	17.7044	JL121323_121323_ABP_127_30B.16840.16840.3	P	3.099	0.101964	0.0339	//21	6//83	0.45675	0.425	R.DASQNGSGDSQSVISVDK[1643]LR.I	Toa2	1	TFIIA2	DASQNGSGDSQSVISVDKLR	110	2//13	9//38	2.64225	1.04545	R.LDLK[2469.25]TVALHAR.N	Spt15	1	TBP	LDLKTVALHAR	83	126.128	583513	127.131	511355	657925	637467	564272	0.885177	-0.175962	-0.175962
	3	TBP:83---TFIIA2:46	11.9968	-0.0975872	0.0975872
						-1	-1.47815	JL121323_121323_ABP_127_50B.24526.24526.5	NP	11.9968	0.369483	0.0274	1//16	21//95	7.5735	2.32143	R.VLETFDK[1643]VVAETLK.D	Toa2	1	TFIIA2	VLETFDKVVAETLK	46	2//13	16//62	4.42325	1.54545	R.LDLK[1998.15]TVALHAR.N	Spt15	1	TBP	LDLKTVALHAR	83	126.128	133461	127.131	122742	563135	145732	135444	0.929403	-0.105623	-0.105623
						0	0.270886	JL121323_121323_ABP_127_50B.24541.24541.5	NP	11.6698	0.397864	0.0379	1//16	22//95	7.3095	2.35714	R.VLETFDK[1643]VVAETLK.D	Toa2	1	TFIIA2	VLETFDKVVAETLK	46	1//13	15//62	4.36025	1.59091	R.LDLK[1998.15]TVALHAR.N	Spt15	1	TBP	LDLKTVALHAR	83	126.128	137304	127.131	129475	596781	149888	142874	0.953202	-0.0691458	-0.0691458
						0	1.25349	JL121323_121323_ABP_127_50B.24547.24547.5	NP	11.628	0.38738	0.0302	1//16	24//95	7.3265	2.53571	R.VLETFDK[1643]VVAETLK.D	Toa2	1	TFIIA2	VLETFDKVVAETLK	46	1//13	15//62	4.3015	1.5	R.LDLK[1998.15]TVALHAR.N	Spt15	1	TBP	LDLKTVALHAR	83	126.128	136200	127.131	130420	602595	148659	143917	0.968097	-0.046776	-0.046776
						0	5.77346	JL121323_121323_ABP_127_70B.22038.22038.5	NP	9.9725	0.312971	1.32e-13	1//16	20//95	5.746	1.96429	R.VLETFDK[1643]VVAETLK.D	Toa2	1	TFIIA2	VLETFDKVVAETLK	46	1//13	13//62	4.2265	1.40909	R.LDLK[1998.15]TVALHAR.N	Spt15	1	TBP	LDLKTVALHAR	83	126.128	80549.9	127.131	72354.2	390038	87976.6	79841.6	0.907533	-0.139978	-0.139978
						-1	3.65532	JL121323_121323_ABP_127_D.21986.21986.4	N	9.74875	0.364249		//16	18//74	6.38525	2.07692	R.VLETFDK[1642.98]VVAETLK.D	Toa2	1	TFIIA2	VLETFDKVVAETLK	46	1//13	15//50	3.3635	1.9	R.LDLK[1998.14]TVALHAR.N	Spt15	1	TBP	LDLKTVALHAR	83	126.128	279153	127.131	224753	743413	305207	248011	0.8126	-0.299383	-0.299383
						0	-2.08736	JL121323_121323_ABP_127_70B.21993.21993.5	NP	9.69075	0.325548	1.76e-11	1//16	21//95	6.21425	2.21429	R.VLETFDK[1643]VVAETLK.D	Toa2	1	TFIIA2	VLETFDKVVAETLK	46	2//13	13//62	3.4765	1.31818	R.LDLK[1998.15]TVALHAR.N	Spt15	1	TBP	LDLKTVALHAR	83	126.128	70095.2	127.131	67221.9	281435	76506.1	74178.3	0.969574	-0.0445776	-0.0445776
						-1	3.89107	JL121323_121323_ABP_127_70B.22008.22008.4	N	9.093	0.32279		1//16	19//74	5.9205	2	R.VLETFDK[1642.98]VVAETLK.D	Toa2	1	TFIIA2	VLETFDKVVAETLK	46	//13	12//50	3.1725	1.6	R.LDLK[1998.14]TVALHAR.N	Spt15	1	TBP	LDLKTVALHAR	83	126.128	282883	127.131	261340	358691	308876	288384	0.933655	-0.0990385	-0.0990385
						0	1.05697	JL121323_121323_ABP_127_70B.21989.21989.5	NP	8.274	0.283206	1.23e-14	1//16	17//95	4.6095	1.64286	R.VLETFDK[1643]VVAETLK.D	Toa2	1	TFIIA2	VLETFDKVVAETLK	46	1//13	13//62	3.6645	1.40909	R.LDLK[1998.15]TVALHAR.N	Spt15	1	TBP	LDLKTVALHAR	83	126.128	66697.9	127.131	65327.6	257385	72781.5	72087.9	0.99047	-0.0138141	-0.0138141
						-2	2.42152	JL121323_121323_ABP_127_D.21981.21981.3	NP	6.853	0.182676	0.00218	1//16	15//53	4.883	1.46429	R.VLETFDK[1643]VVAETLK.D	Toa2	1	TFIIA2	VLETFDKVVAETLK	46	1//13	10//38	1.97	1.31818	R.LDLK[1998.15]TVALHAR.N	Spt15	1	TBP	LDLKTVALHAR	83	126.127	259951	127.131	246681	1.18591e+06	283758	272208	0.959298	-0.0599484	-0.0599484
	4	TBP:35---TFIIA2:119	11.377	0.0427081	-0.0427081
						0	2.99643	JL121323_121323_ABP_127_30B.07106.07106.4	NP	11.377	0.392344	0.00248	//19	29//102	10.1523	2.55882	R.DGTK[1325.76]PATTFQSEEDIKR.A	Spt15	1	TBP	DGTKPATTFQSEEDIKR	35	1//10	7//32	1.22475	0.875	R.IVAC[160.03]NSK[2329.2]K.S	Toa2	1	TFIIA2	IVACNSKK	119	126.128	41467	127.131	42219.6	301520	45229.7	46588.7	1.03005	0.0427081	0.0427081
3	TBP---TFIIB
	1	TBP:133---TFIIB:55	13.9987	-0.283296	0.283296
						0	0.309732	JL121323_121323_ABP_127_30B.30094.30094.5	P	13.9987	0.342155	0.248	//15	40//183	13.9812	2.30435	R.FSEGDVVC[160.03]ALC[160.03]GLVLSDK[1513.78]LVDTR.S	Sua7	1	TFIIB	FSEGDVVCALCGLVLSDKLVDTR	55	//12	2//54	0.0175	0.1	K.SEDDSK[2959.52]LASR.K	Spt15	1	TBP	SEDDSKLASR	133	126.128	351567	127.131	253149	1.06578e+06	384743	279346	0.726058	-0.461843	-0.461843
						-2	3.59557	JL121323_121323_ABP_127_70B.27137.27137.5	P	13.1442	0.340613	1.54e-09	//15	37//183	13.0508	2.28261	R.FSEGDVVC[160.03]ALC[160.03]GLVLSDK[1513.78]LVDTR.S	Sua7	1	TFIIB	FSEGDVVCALCGLVLSDKLVDTR	55	//12	3//54	0.0935	0.25	K.SEDDSK[2959.52]LASR.K	Spt15	1	TBP	SEDDSKLASR	133	126.128	116694	127.131	107385	324432	127421	118498	0.929967	-0.104748	-0.104748
	2	TBP:133---TFIIB:98	7.673	-0.440113	0.440113
						0	1.83115	JL121323_121323_ABP_127_1ug.06176.06176.4	NP	7.673	0.262172	9.15e-09	//12	19//47	5.349	2.7	R.IGK[1513.78]GETTDM[147.04]R.F	Sua7	1	TFIIB	IGKGETTDMR	98	//12	12//45	2.324	1.65	K.SEDDSK[1529.8]LASR.K	Spt15	1	TBP	SEDDSKLASR	133	126.128	118199	127.131	83054.4	582590	129378	91649.2	0.708381	-0.497402	-0.497402
						0	1.66768	JL121323_121323_ABP_127_1ug.06190.06190.5	NP	5.2135	0.231855	0.000516	//12	8//57	2.049	1.1	R.IGK[1513.78]GETTDM[147.04]R.F	Sua7	1	TFIIB	IGKGETTDMR	98	//12	11//55	3.1645	1.6	K.SEDDSK[1529.8]LASR.K	Spt15	1	TBP	SEDDSKLASR	133	126.128	76689.7	127.131	58303.9	223558	83889	64337.4	0.766935	-0.382824	-0.382824
	3	TBP:97---TFIIB:98	5.17225	-0.29402	0.29402
						0	2.78056	JL121323_121323_ABP_127_30B.05695.05695.4	NP	5.17225	0.21328	0.0839	//12	15//48	3.43775	1.75	R.IGK[1397.75]GETTDM[147.04]R.F	Sua7	1	TFIIB	IGKGETTDMR	98	1//10	10//36	1.7345	1.375	R.NAEYNPK[1529.8]R.F	Spt15	1	TBP	NAEYNPKR	97	126.128	79097.7	127.131	67580.7	226500	86432.6	74574.2	0.862801	-0.2129	-0.2129
						0	3.3929	JL121323_121323_ABP_127_1ug.05838.05838.4	NP	5.11775	0.209589	8.35e-06	//12	15//48	3.26075	1.75	R.IGK[1397.75]GETTDM[147.04]R.F	Sua7	1	TFIIB	IGKGETTDMR	98	1//10	8//36	1.857	1.3125	R.NAEYNPK[1529.8]R.F	Spt15	1	TBP	NAEYNPKR	97	126.128	128622	127.131	93946.3	372364	140743	103668	0.73658	-0.441087	-0.441087
						0	4.31142	JL121323_121323_ABP_127_1ug.05849.05849.4	NP	5.04375	0.194946	6.35e-08	//12	14//48	3.082	1.45	R.IGK[1397.75]GETTDM[147.04]R.F	Sua7	1	TFIIB	IGKGETTDMR	98	1//10	9//36	1.96175	1.375	R.NAEYNPK[1529.8]R.F	Spt15	1	TBP	NAEYNPKR	97	126.128	162450	127.131	120887	517219	177732	133397	0.750552	-0.413976	-0.413976
						0	3.84661	JL121323_121323_ABP_127_1ug.05850.05850.5	NP	5.0385	0.197829	0.0384	//12	8//58	2.2165	1.1	R.IGK[1397.75]GETTDM[147.04]R.F	Sua7	1	TFIIB	IGKGETTDMR	98	1//10	10//44	2.822	1.4375	R.NAEYNPK[1529.8]R.F	Spt15	1	TBP	NAEYNPKR	97	126.128	84434.9	127.131	61158.8	90917.3	92398.2	67487.8	0.730401	-0.453239	-0.453239
						0	0.464908	JL121323_121323_ABP_127_30B.06407.06407.4	N	3.466	0.215849		//12	8//48	1.844	1.16667	R.IGK[1397.75]GETTDMR.F	Sua7	1	TFIIB	IGKGETTDMR	98	//10	4//36	1.622	0.642857	R.NAEYNPK[1513.8]R.F	Spt15	1	TBP	NAEYNPKR	97	126.127	35033.5	127.13	29037.9	107791	38293.1	32042.8	0.836778	-0.257083	-0.257083
						0	5.58609	JL121323_121323_ABP_127_30B.05705.05705.5	N	3.39075	0.175532		//12	5//58	1.7165	0.888889	R.IGK[1397.76]GETTDM[147.04]R.F	Sua7	1	TFIIB	IGKGETTDMR	98	//10	7//44	1.67425	1	R.NAEYNPK[1529.81]R.F	Spt15	1	TBP	NAEYNPKR	97	126.127	32812.6	127.131	32760.9	32812.6	35797.9	36151.1	1.00987	0.0141667	0.0141667
	4	TBP:97---TFIIB:55	12.6732	-0.31378	0.31378
						0	1.51255	JL121323_121323_ABP_127_70B.26467.26467.5	P	12.6732	0.363328	0.0483	//15	41//183	12.4612	2.58696	R.FSEGDVVC[160.03]ALC[160.03]GLVLSDK[1397.75]LVDTR.S	Sua7	1	TFIIB	FSEGDVVCALCGLVLSDKLVDTR	55	//10	2//41	0.212	0.25	R.NAEYNPK[2959.52]R.F	Spt15	1	TBP	NAEYNPKR	97	126.128	129548	127.131	101823	424905	141669	112360	0.793115	-0.334398	-0.334398
						-1	1.76807	JL121323_121323_ABP_127_D.26241.26241.5	P	11.469	0.342409	1.65e-05	//15	35//183	11.2715	2.26087	R.FSEGDVVC[160.03]ALC[160.03]GLVLSDK[1397.75]LVDTR.S	Sua7	1	TFIIB	FSEGDVVCALCGLVLSDKLVDTR	55	//10	3//41	0.1975	0.3125	R.NAEYNPK[2959.52]R.F	Spt15	1	TBP	NAEYNPKR	97	126.128	168526	127.131	125224	453721	184382	138183	0.749435	-0.416125	-0.416125
						-1	3.04565	JL121323_121323_ABP_127_D.26236.26236.5	P	11.2863	0.341413	0.0179	//15	34//183	11.0938	2.32609	R.FSEGDVVC[160.03]ALC[160.03]GLVLSDK[1397.75]LVDTR.S	Sua7	1	TFIIB	FSEGDVVCALCGLVLSDKLVDTR	55	//10	3//41	0.1925	0.3125	R.NAEYNPK[2959.52]R.F	Spt15	1	TBP	NAEYNPKR	97	126.128	161386	127.131	134308	413242	176395	148207	0.840199	-0.251197	-0.251197
						0	-1.92095	JL121323_121323_ABP_127_D.26254.26254.5	P	11.002	0.336958	1.28e-05	//15	33//183	10.8605	2.30435	R.FSEGDVVC[160.03]ALC[160.03]GLVLSDK[1397.75]LVDTR.S	Sua7	1	TFIIB	FSEGDVVCALCGLVLSDKLVDTR	55	//10	2//41	0.1415	0.25	R.NAEYNPK[2959.52]R.F	Spt15	1	TBP	NAEYNPKR	97	126.128	184364	127.131	153199	482234	201513	169053	0.838916	-0.253401	-0.253401
	5	TBP:97---TFIIB:314	6.759	0.457448	-0.457448
						0	1.3075	JL121323_121323_ABP_127_50B.07897.07897.4	N	6.759	0.297511		//12	15//50	5.55625	2.11111	K.SGYK[1397.75]ILYEHR.D	Sua7	1	TFIIB	SGYKILYEHR	314	1//10	7//35	1.20275	1	R.NAEYNPK[1671.92]R.F	Spt15	1	TBP	NAEYNPKR	97	126.128	530827	127.131	717785	717785	576839	792064	1.37311	0.457448	0.457448
	6	TBP:55---TFIIB:164	13.673	-0.282695	0.282695
						-1	-5.05977	JL121323_121323_ABP_127_70B.26185.26185.6	P	13.673	0.330941	0.0359	//15	30//255	11.6288	1.32258	R.AAPESEK[2901.57]DTSATSGIVPTLQNIVATVTLGC[160.03]R.L	Spt15	1	TBP	AAPESEKDTSATSGIVPTLQNIVATVTLGCR	55	//15	9//159	2.04425	0.5	K.TLK[3592.89]GK[425.27]SM[147.04]ESIM[147.04]AASILIGC[160.03]R.R	Sua7	1	TFIIB	TLKGKSMESIMAASILIGCR	164	126.128	119552	127.131	90743.8	766746	130777	100134	0.765688	-0.385172	-0.385172
						-2	-1.37709	JL121323_121323_ABP_127_D.26978.26978.6	P	8.99975	0.275829	0.000244	//14	18//265	6.46275	0.796875	K.RAAPESEK[2604.39]DTSATSGIVPTLQNIVATVTLGC[160.03]R.L	Spt15	1	TBP	RAAPESEKDTSATSGIVPTLQNIVATVTLGCR	55	//19	8//157	2.537	0.6	K.TLK[3748.99]GKSM[147.04]ESIM[147.04]AASILIGC[160.03]R.R	Sua7	1	TFIIB	TLKGKSMESIMAASILIGCR	164	126.127	106246	127.13	80176.1	544215	116227	88473	0.761206	-0.393641	-0.393641
						-2	-6.57564	JL121323_121323_ABP_127_D.26011.26011.6	P	8.42	0.222451	0.281	//15	19//255	6.772	0.741935	R.AAPESEK[2901.57]DTSATSGIVPTLQNIVATVTLGC[160.03]R.L	Spt15	1	TBP	AAPESEKDTSATSGIVPTLQNIVATVTLGCR	55	1//15	12//159	1.648	0.5	K.TLK[3592.89]GK[425.27]SM[147.04]ESIM[147.04]AASILIGC[160.03]R.R	Sua7	1	TFIIB	TLKGKSMESIMAASILIGCR	164	126.128	86660	127.131	81712	296834	94602.9	90167.8	0.953119	-0.0692721	-0.0692721
	7	TBP:55---TFIIB:166	15.919	-0.0903783	0.0903783
						-1	0.593111	JL121323_121323_ABP_127_D.26564.26564.4	N	15.919	0.444739		//14	35//192	13.8767	1.67742	K.RAAPESEK[2246.16]DTSATSGIVPTLQNIVATVTLGC[160.03]R.L	Spt15	1	TBP	RAAPESEKDTSATSGIVPTLQNIVATVTLGCR	55	//17	11//97	2.04225	0.6875	K.GK[3748.98]SM[147.04]ESIMAASILIGC[160.03]R.R	Sua7	1	TFIIB	GKSMESIMAASILIGCR	166	126.127	45077	127.13	44484.9	304946	49184.5	49088.4	0.998045	-0.00282272	-0.00282272
						-1	2.91793	JL121323_121323_ABP_127_30B.29071.29071.4	N	15.275	0.519161		//14	34//192	13.1062	1.58065	K.RAAPESEK[2246.15]DTSATSGIVPTLQNIVATVTLGC[160.03]R.L	Spt15	1	TBP	RAAPESEKDTSATSGIVPTLQNIVATVTLGCR	55	//17	10//97	2.16875	0.625	K.GK[3748.97]SM[147.04]ESIMAASILIGC[160.03]R.R	Sua7	1	TFIIB	GKSMESIMAASILIGCR	166	126.128	41566.4	127.131	41247.6	239655	45351.2	45516	1.00363	0.00523387	0.00523387
						0	5.0736	JL121323_121323_ABP_127_30B.29045.29045.4	N	14.5892	0.473977		//14	31//192	12.552	1.43548	K.RAAPESEK[2246.14]DTSATSGIVPTLQNIVATVTLGC[160.03]R.L	Spt15	1	TBP	RAAPESEKDTSATSGIVPTLQNIVATVTLGCR	55	//17	8//97	2.03725	0.5625	K.GK[3748.96]SM[147.04]ESIMAASILIGC[160.03]R.R	Sua7	1	TFIIB	GKSMESIMAASILIGCR	166	126.128	43460	127.131	43735.1	196657	47409.9	48261	1.01795	0.0256703	0.0256703
						0	-6.27639	JL121323_121323_ABP_127_D.26131.26131.5	P	12.9448	0.368356	0.00837	//15	30//255	11.4593	1.33871	R.AAPESEK[2901.57]DTSATSGIVPTLQNIVATVTLGC[160.03]R.L	Spt15	1	TBP	AAPESEKDTSATSGIVPTLQNIVATVTLGCR	55	//16	5//160	1.4855	0.325	K.TLK[425.27]GK[3592.89]SM[147.04]ESIM[147.04]AASILIGC[160.03]R.R	Sua7	1	TFIIB	TLKGKSMESIMAASILIGCR	166	126.127	324538	127.131	192620	1.4982e+06	355662	212553	0.597627	-0.742684	-0.742684
						0	1.55315	JL121323_121323_ABP_127_30B.28979.28979.5	N	12.5077	0.367168		//14	36//265	10.1948	1.43548	K.RAAPESEK[2246.17]DTSATSGIVPTLQNIVATVTLGC[160.03]R.L	Spt15	1	TBP	RAAPESEKDTSATSGIVPTLQNIVATVTLGCR	55	1//17	11//125	2.313	0.71875	K.GK[3748.99]SM[147.04]ESIMAASILIGC[160.03]R.R	Sua7	1	TFIIB	GKSMESIMAASILIGCR	166	126.128	101036	127.131	105857	201251	110168	116811	1.0603	0.0844715	0.0844715
						-2	9.10141	JL121323_121323_ABP_127_30B.28436.28436.5	N	11.2368	0.354432		//15	24//255	9.26675	1.06667	R.AAPESEK[2885.52]DTSATSGIVPTLQNIVATVTLGC[160.03]R.L	Spt15	1	TBP	AAPESEKDTSATSGIVPTLQNIVATVTLGCR	55	//16	10//160	1.97	0.552632	K.TLK[425.27]GK[3592.83]SM[147.04]ESIMAASILIGC[160.03]R.R	Sua7	1	TFIIB	TLKGKSMESIMAASILIGCR	166	126.127	98783.7	127.13	85275.1	149867	107934	94099.7	0.871831	-0.19788	-0.19788
						-1	-10.107	JL121323_121323_ABP_127_70B.26124.26124.5	P	11.1215	0.357944	0.0297	//15	25//255	9.46425	1.1129	R.AAPESEK[2901.57]DTSATSGIVPTLQNIVATVTLGC[160.03]R.L	Spt15	1	TBP	AAPESEKDTSATSGIVPTLQNIVATVTLGCR	55	1//16	7//160	1.65725	0.45	K.TLK[425.27]GK[3592.89]SM[147.04]ESIM[147.04]AASILIGC[160.03]R.R	Sua7	1	TFIIB	TLKGKSMESIMAASILIGCR	166	126.128	57497.1	127.131	49696.8	166905	62822	54839.6	0.872936	-0.196052	-0.196052
						0	5.33315	JL121323_121323_ABP_127_30B.28531.28531.6	N	10.6265	0.29095		//15	23//186	8.329	1.03333	R.AAPESEK[2885.54]DTSATSGIVPTLQNIVATVTLGC[160.03]R.L	Spt15	1	TBP	AAPESEKDTSATSGIVPTLQNIVATVTLGCR	55	//15	11//119	2.2975	0.710526	K.TLK[3592.85]GK[425.27]SMESIM[147.04]AASILIGC[160.03]R.R	Sua7	1	TFIIB	TLKGKSMESIMAASILIGCR	166	126.127	225888	127.13	202538	774728	246719	223497	0.905875	-0.142617	-0.142617
						-2	9.98701	JL121323_121323_ABP_127_70B.26203.26203.7	N	9.9805	0.281859		//15	19//186	7.8565	0.883333	R.AAPESEK[2901.51]DTSATSGIVPTLQNIVATVTLGC[160.03]R.L	Spt15	1	TBP	AAPESEKDTSATSGIVPTLQNIVATVTLGCR	55	//15	10//119	2.124	0.552632	K.TLK[3592.83]GK[425.27]SM[147.04]ESIM[147.04]AASILIGC[160.03]R.R	Sua7	1	TFIIB	TLKGKSMESIMAASILIGCR	166	126.127	97760.5	127.131	61457.1	598875	107094	67816.9	0.633244	-0.659166	-0.659166
						-2	11.9939	JL121323_121323_ABP_127_50B.29818.29818.7	N	9.214	0.268207		//15	20//186	7.15125	0.883333	R.AAPESEK[2901.49]DTSATSGIVPTLQNIVATVTLGC[160.03]R.L	Spt15	1	TBP	AAPESEKDTSATSGIVPTLQNIVATVTLGCR	55	//15	10//119	2.06275	0.552632	K.TLK[3592.81]GK[425.27]SM[147.04]ESIM[147.04]AASILIGC[160.03]R.R	Sua7	1	TFIIB	TLKGKSMESIMAASILIGCR	166	126.127	140304	127.131	136993	582017	153106	151169	0.987348	-0.0183692	-0.0183692
						-2	6.22705	JL121323_121323_ABP_127_30B.28065.28065.6	N	8.87225	0.256331		//15	18//186	6.5585	0.783333	R.AAPESEK[2901.53]DTSATSGIVPTLQNIVATVTLGC[160.03]R.L	Spt15	1	TBP	AAPESEKDTSATSGIVPTLQNIVATVTLGCR	55	1//15	13//119	2.31375	0.631579	K.TLK[3592.85]GK[425.27]SM[147.04]ESIM[147.04]AASILIGC[160.03]R.R	Sua7	1	TFIIB	TLKGKSMESIMAASILIGCR	166	126.128	144784	127.131	130312	319615	158129	143797	0.909363	-0.137072	-0.137072
						-1	14.7694	JL121323_121323_ABP_127_30B.29374.29374.6	N	8.78175	0.235426		//14	16//192	6.3885	0.693548	K.RAAPESEK[2588.48]DTSATSGIVPTLQNIVATVTLGC[160.03]R.L	Spt15	1	TBP	RAAPESEKDTSATSGIVPTLQNIVATVTLGCR	55	//20	11//120	2.39325	0.657895	K.TLKGK[3749.07]SM[147.04]ESIMAASILIGC[160.03]R.R	Sua7	1	TFIIB	TLKGKSMESIMAASILIGCR	166	126.127	158559	127.131	145880	405136	173136	160977	0.929771	-0.105053	-0.105053
						-1	0.0918902	JL121323_121323_ABP_127_D.29375.29375.4	N	8.66975	0.227213		//15	26//186	7.384	1	R.AAPESEK[2230.17]DTSATSGIVPTLQNIVATVTLGC[160.03]R.L	Spt15	1	TBP	AAPESEKDTSATSGIVPTLQNIVATVTLGCR	55	1//17	8//96	1.28575	0.5625	K.GK[3592.89]SMESIMAASILIGC[160.03]R.R	Sua7	1	TFIIB	GKSMESIMAASILIGCR	166	126.127	16250.3	127.13	20275.6	1.081e+06	17679.5	22373.8	1.26552	0.339731	0.339731
						0	11.0639	JL121323_121323_ABP_127_30B.27332.27332.6	N	8.0925	0.222912		//15	14//186	5.77725	0.633333	R.AAPESEK[2885.5]DTSATSGIVPTLQNIVATVTLGC[160.03]R.L	Spt15	1	TBP	AAPESEKDTSATSGIVPTLQNIVATVTLGCR	55	2//16	14//120	2.31525	0.710526	K.TLK[425.27]GK[3592.82]SMESIM[147.04]AASILIGC[160.03]R.R	Sua7	1	TFIIB	TLKGKSMESIMAASILIGCR	166	126.128	150908	127.131	142198	320175	164741	156914	0.952485	-0.070231	-0.070231
						0	4.04999	JL121323_121323_ABP_127_30B.29085.29085.6	N	7.94	0.232412		//14	19//192	6.293	0.790323	K.RAAPESEK[2246.14]DTSATSGIVPTLQNIVATVTLGC[160.03]R.L	Spt15	1	TBP	RAAPESEKDTSATSGIVPTLQNIVATVTLGCR	55	//17	8//97	1.647	0.5625	K.GK[3748.96]SM[147.04]ESIMAASILIGC[160.03]R.R	Sua7	1	TFIIB	GKSMESIMAASILIGCR	166	126.127	159393	127.13	178871	599217	173655	197381	1.13663	0.184765	0.184765
						0	6.19638	JL121323_121323_ABP_127_50B.30458.30458.6	N	7.8975	0.268112		//14	19//192	6.2485	0.758065	K.RAAPESEK[2246.13]DTSATSGIVPTLQNIVATVTLGC[160.03]R.L	Spt15	1	TBP	RAAPESEKDTSATSGIVPTLQNIVATVTLGCR	55	//17	7//97	1.649	0.5625	K.GK[3748.95]SMESIM[147.04]AASILIGC[160.03]R.R	Sua7	1	TFIIB	GKSMESIMAASILIGCR	166	126.127	114397	127.131	121121	241393	124721	133655	1.07163	0.0998055	0.0998055
						-2	8.34615	JL121323_121323_ABP_127_30B.28544.28544.7	N	7.5315	0.229381		//15	13//186	5.17325	0.6	R.AAPESEK[2885.52]DTSATSGIVPTLQNIVATVTLGC[160.03]R.L	Spt15	1	TBP	AAPESEKDTSATSGIVPTLQNIVATVTLGCR	55	//15	13//119	2.35825	0.684211	K.TLK[3592.84]GK[425.27]SM[147.04]ESIMAASILIGC[160.03]R.R	Sua7	1	TFIIB	TLKGKSMESIMAASILIGCR	166	126.127	149808	127.131	147277	410489	163466	162518	0.994199	-0.0083932	-0.0083932
						-2	10.3655	JL121323_121323_ABP_127_70B.28969.28969.5	N	7.2345	0.203436		1//15	18//255	5.59425	0.783333	R.AAPESEK[2588.33]DTSATSGIVPTLQNIVATVTLGC[160.03]R.L	Spt15	1	TBP	AAPESEKDTSATSGIVPTLQNIVATVTLGCR	55	2//20	14//158	1.64025	0.578947	K.TLKGK[3592.83]SM[147.04]ESIMAASILIGC[160.03]R.R	Sua7	1	TFIIB	TLKGKSMESIMAASILIGCR	166	126.128	26029.8	127.131	24261.1	65475.1	28419	26771.7	0.942035	-0.0861472	-0.0861472
	8	TBP:55---TFIIB:122	7.9785	0.00891575	-0.00891575
						0	3.31488	JL121323_121323_ABP_127_70B.27546.27546.5	N	7.9785	0.228117		//14	26//265	6.34125	1	K.RAAPESEK[1626.9]DTSATSGIVPTLQNIVATVTLGC[160.03]R.L	Spt15	1	TBP	RAAPESEKDTSATSGIVPTLQNIVATVTLGCR	55	3//12	10//65	1.63725	0.863636	K.K[3749]DNEVQAAFAK.I	Sua7	1	TFIIB	KDNEVQAAFAK	122	126.127	91289.9	127.131	90818.7	327896	99599.5	100217	1.0062	0.00891575	0.00891575
	9	TBP:15---TFIIB:33	5.598	-0.105519	0.105519
						-3	15.5601	JL121323_121323_ABP_127_30B.14460.14460.7	N	5.598	0.192223		1//10	13//129	3.5105	0.795455	R.GPNLNIVLTC[160.03]PEC[160.03]K[425.27]VYPPK[1791.9]IVER.F	Sua7	1	TFIIB	GPNLNIVLTCPECKVYPPKIVER	33	//13	8//53	2.0875	1.4	K.E[111.03]ANK[3399.78]IVFDPNTR.Q	Spt15	1	TBP	EANKIVFDPNTR	15	126.127	969008	127.131	891241	2.43779e+06	1.0581e+06	983470	0.929471	-0.105519	-0.105519
	10	TBP:15---TFIIB:262	4.63475	-0.371923	0.371923
						-1	10.835	JL121323_121323_ABP_127_100B.14657.14657.3	N	4.63475	0.155913		//13	7//46	2.291	1	K.E[111.03]ANK[1211.74]IVFDPNTR.Q	Spt15	1	TBP	EANKIVFDPNTR	15	1//7	8//21	2.34375	1.75	K.K[1792]C[160.03]KEIK.E	Sua7	1	TFIIB	KCKEIK	262	126.128	278213	127.131	213104	471008	304311	235157	0.772752	-0.371923	-0.371923
	11	TBP:15---TFIIB:164	3.04875	-0.31519	0.31519
						-1	3.01275	JL121323_121323_ABP_127_50B.23428.23428.7	P	3.04875	0.111745	0.257	//15	8//159	0.23325	0.2	K.TLK[2511.36]GK[425.27]SMESIMAASILIGC[160.03]R.R	Sua7	1	TFIIB	TLKGKSMESIMAASILIGCR	164	//16	10//115	2.8155	0.9	K.EFK[425.27]EANK[2869.58]IVFDPNTR.Q	Spt15	1	TBP	EFKEANKIVFDPNTR	15	126.128	181208	127.131	144319	320692	198139	159253	0.803745	-0.31519	-0.31519
	12	TBP:15---TFIIB:55	11.5128	0.0167409	-0.0167409
						-1	3.18479	JL121323_121323_ABP_127_50B.32611.32611.5	N	11.5128	0.321455		//15	32//183	9.86175	2.09091	R.FSEGDVVC[160.03]ALC[160.03]GLVLSDK[1810]LVDTR.S	Sua7	1	TFIIB	FSEGDVVCALCGLVLSDKLVDTR	55	//14	8//74	1.651	0.772727	K.EANK[2959.54]IVFDPNTR.Q	Spt15	1	TBP	EANKIVFDPNTR	15	126.128	116677	127.131	128202	224181	127150	141468	1.11261	0.153954	0.153954
						-2	-0.726545	JL121323_121323_ABP_127_30B.31522.31522.5	NP	9.04	0.254236	0.274	//15	27//183	7.643	1.34783	R.FSEGDVVC[160.03]ALC[160.03]GLVLSDK[1809.98]LVDTR.S	Sua7	1	TFIIB	FSEGDVVCALCGLVLSDKLVDTR	55	//14	8//74	1.397	0.541667	K.EANK[2959.52]IVFDPNTR.Q	Spt15	1	TBP	EANKIVFDPNTR	15	126.128	120926	127.131	117394	211554	131968	129542	0.981616	-0.0267696	-0.0267696
						-3	14.3981	JL121323_121323_ABP_127_30B.28696.28696.5	N	6.20375	0.170164		//15	17//183	4.94125	0.840909	R.FSEGDVVC[160.03]ALC[160.03]GLVLSDK[1810.04]LVDTR.S	Sua7	1	TFIIB	FSEGDVVCALCGLVLSDKLVDTR	55	1//14	9//74	1.2625	0.727273	K.EANK[2959.58]IVFDPNTR.Q	Spt15	1	TBP	EANKIVFDPNTR	15	126.128	380058	127.131	356473	380058	414916	393362	0.948052	-0.0769617	-0.0769617
	13	TBP:15---TFIIB:9	2.39275	-0.112888	0.112888
						1	0.951697	JL121323_121323_ABP_127_D.22986.22986.3	P	2.39275	0.0587726	0.274	1//15	9//50	2.2825	0.833333	K.E[111.03]ANK[1419.8]IVFDPNTR.Q	Spt15	1	TBP	EANKIVFDPNTR	15	//12	2//32	0.11025	0.111111	R.E[111.03]SIDK[1791.97]RAGR.R	Sua7	1	TFIIB	ESIDKRAGR	9	126.128	363938	127.131	333042	363938	397418	367506	0.924735	-0.112888	-0.112888
	14	TBP:15---TFIIB:166	9.998	-0.252261	0.252261
						0	4.82661	JL121323_121323_ABP_127_50B.24819.24819.5	N	9.998	0.32613		//16	18//160	8.13975	1.39474	K.TLK[425.27]GK[1791.95]SM[147.04]ESIMAASILIGC[160.03]R.R	Sua7	1	TFIIB	TLKGKSMESIMAASILIGCR	166	//13	10//65	1.85825	1	K.E[111.03]ANK[2885.55]IVFDPNTR.Q	Spt15	1	TBP	EANKIVFDPNTR	15	126.127	451691	127.131	395514	586215	493460	436444	0.884455	-0.177139	-0.177139
						0	11.0154	JL121323_121323_ABP_127_50B.24839.24839.5	N	9.2975	0.301867		//15	16//159	7.20675	1.15789	K.TLK[1791.93]GK[425.27]SM[147.04]ESIMAASILIGC[160.03]R.R	Sua7	1	TFIIB	TLKGKSMESIMAASILIGCR	166	1//13	10//65	2.09075	1	K.E[111.03]ANK[2885.52]IVFDPNTR.Q	Spt15	1	TBP	EANKIVFDPNTR	15	126.127	449304	127.131	418256	527934	490551	461539	0.940859	-0.0879488	-0.0879488
						-3	9.82764	JL121323_121323_ABP_127_30B.24371.24371.5	N	8.56475	0.284822		1//20	22//158	7.08325	1.42105	K.TLKGK[2196.22]SMESIM[147.04]AASILIGC[160.03]R.R	Sua7	1	TFIIB	TLKGKSMESIMAASILIGCR	166	1//16	9//100	1.4815	0.615385	K.E[111.03]FKEANK[2588.43]IVFDPNTR.Q	Spt15	1	TBP	EFKEANKIVFDPNTR	15	126.128	343235	127.131	366183	416016	374177	404077	1.07991	0.110907	0.110907
						0	4.73194	JL121323_121323_ABP_127_70B.21525.21525.5	NP	7.9005	0.233826	3.07e-08	1//17	13//125	5.50875	1.23529	K.GK[2493.35]SM[147.04]ESIM[147.04]AASILIGC[160.03]R.R	Sua7	1	TFIIB	GKSMESIMAASILIGCR	166	3//16	14//121	2.39175	0.966667	K.E[111.03]FK[425.27]EANK[2262.16]IVFDPNTR.Q	Spt15	1	TBP	EFKEANKIVFDPNTR	15	126.128	280317	127.131	272213	427950	305914	300382	0.981917	-0.0263267	-0.0263267
						-1	16.6388	JL121323_121323_ABP_127_30B.46375.46375.5	N	6.9985	0.256257		//15	17//159	4.6505	1.18421	K.TLK[1810.05]GK[425.27]SM[147.04]ESIM[147.04]AASILIGC[160.03]R.R	Sua7	1	TFIIB	TLKGKSMESIMAASILIGCR	166	//14	8//74	2.348	0.954545	K.EANK[2901.64]IVFDPNTR.Q	Spt15	1	TBP	EANKIVFDPNTR	15	126.127	28266.5	127.13	18918.9	105104	30951.3	20876.7	0.674503	-0.568104	-0.568104
						-2	10.6592	JL121323_121323_ABP_127_70B.21497.21497.5	N	6.9505	0.220413		2//13	13//108	2.58775	1.03846	K.E[111.03]FK[2262.21]EANK[425.27]IVFDPNTR.Q	Spt15	1	TBP	EFKEANKIVFDPNTR	15	1//17	11//125	4.36275	1.0625	K.GK[2493.4]SM[147.04]ESIM[147.04]AASILIGC[160.03]R.R	Sua7	1	TFIIB	GKSMESIMAASILIGCR	166	126.127	280639	127.131	251963	475191	306515	278037	0.907091	-0.140681	-0.140681
						-2	13.9681	JL121323_121323_ABP_127_D.20074.20074.5	N	6.50675	0.206839		1//17	10//127	2.6335	0.8125	K.GK[1809.93]SM[147.04]ESIM[147.04]AASILIGC[160.03]R.R	Sua7	1	TFIIB	GKSMESIMAASILIGCR	166	1//14	10//74	3.87325	1.40909	K.EANK[2262.11]IVFDPNTR.Q	Spt15	1	TBP	EANKIVFDPNTR	15	126.127	193931	127.131	156889	357324	212022	173125	0.816542	-0.292401	-0.292401
						0	14.4121	JL121323_121323_ABP_127_50B.22978.22978.5	N	5.59875	0.181739		//16	15//160	2.51675	0.763158	K.TLK[425.27]GK[2493.28]SMESIMAASILIGC[160.03]R.R	Sua7	1	TFIIB	TLKGKSMESIMAASILIGCR	166	2//15	10//108	3.082	0.884615	K.E[111.03]FK[425.27]EANK[2869.51]IVFDPNTR.Q	Spt15	1	TBP	EFKEANKIVFDPNTR	15	126.127	408665	127.13	354013	762832	446503	390648	0.874906	-0.1928	-0.1928
						0	7.57915	JL121323_121323_ABP_127_D.15391.15391.5	N	5.41075	0.182291		2//20	12//156	3.3835	0.605263	K.TLKGK[2493.32]SMESIMAASILIGC[160.03]R.R	Sua7	1	TFIIB	TLKGKSMESIMAASILIGCR	166	//15	10//108	2.02725	0.769231	K.E[111.03]FK[425.27]EANK[2572.36]IVFDPNTR.Q	Spt15	1	TBP	EFKEANKIVFDPNTR	15	126.127	421868	127.131	253890	1.59469e+06	462284	280163	0.606042	-0.722511	-0.722511
						-1	1.40839	JL121323_121323_ABP_127_70B.15082.15082.6	N	4.7725	0.195614		//15	10//119	3.2425	0.605263	K.TLK[2493.35]GK[425.27]SMESIM[147.04]AASILIGC[160.03]R.R	Sua7	1	TFIIB	TLKGKSMESIMAASILIGCR	166	//13	8//82	1.53	0.769231	K.E[111.03]FK[2885.56]EANK[425.27]IVFDPNTR.Q	Spt15	1	TBP	EFKEANKIVFDPNTR	15	126.127	335050	127.131	246557	1.01075e+06	366603	272071	0.742142	-0.430233	-0.430233
						0	3.35151	JL121323_121323_ABP_127_50B.23588.23588.5	N	4.7425	0.170793		//16	10//160	1.57	0.552632	K.TLK[425.27]GK[2493.37]SMESIMAASILIGC[160.03]R.R	Sua7	1	TFIIB	TLKGKSMESIMAASILIGCR	166	//13	10//108	3.1725	0.884615	K.E[111.03]FK[2869.59]EANK[425.27]IVFDPNTR.Q	Spt15	1	TBP	EFKEANKIVFDPNTR	15	126.128	394951	127.131	326813	1.11316e+06	431705	360633	0.835368	-0.259516	-0.259516
						0	10.2398	JL121323_121323_ABP_127_50B.24320.24320.5	N	4.70275	0.159534		//15	12//159	2.05975	0.605263	K.TLK[2493.3]GK[425.27]SMESIMAASILIGC[160.03]R.R	Sua7	1	TFIIB	TLKGKSMESIMAASILIGCR	166	1//13	11//108	2.643	0.923077	K.E[111.03]FK[2869.53]EANK[425.27]IVFDPNTR.Q	Spt15	1	TBP	EFKEANKIVFDPNTR	15	126.128	346476	127.131	290493	754381	378673	320554	0.846521	-0.240381	-0.240381
	15	TBP:110---TFIIB:55	8.05875	0.0457933	-0.0457933
						-2	2.5523	JL121323_121323_ABP_127_30B.32640.32640.5	NP	8.05875	0.267036	0.000621	//15	24//183	6.13675	1.13043	R.FSEGDVVC[160.03]ALC[160.03]GLVLSDK[1769.02]LVDTR.S	Sua7	1	TFIIB	FSEGDVVCALCGLVLSDKLVDTR	55	1//15	9//78	1.922	1	R.EPK[2959.52]TTALIFASGK.M	Spt15	1	TBP	EPKTTALIFASGK	110	126.128	121356	127.131	126517	126517	132332	139610	1.05499	0.077235	0.077235
						-1	-1.98594	JL121323_121323_ABP_127_D.28735.28735.4	P	6.459	0.180049	0.0361	1//15	21//136	5.78025	1	R.FSEGDVVC[160.03]ALC[160.03]GLVLSDK[1769.02]LVDTR.S	Sua7	1	TFIIB	FSEGDVVCALCGLVLSDKLVDTR	55	//15	6//63	0.67875	0.423077	R.EPK[2959.52]TTALIFASGK.M	Spt15	1	TBP	EPKTTALIFASGK	110	126.127	109915	127.131	109756	207751	119915	121114	1.01	0.0143516	0.0143516
	16	TBP:11---TFIIB:55	12.257	-0.0372198	0.0372198
						-2	14.5377	JL121323_121323_ABP_127_30B.29470.29470.4	P	12.257	0.295478	0.0944	1//15	33//138	11.7265	1.93478	R.FSEGDVVC[160.03]ALC[160.03]GLVLSDK[1271.7]LVDTR.S	Sua7	1	TFIIB	FSEGDVVCALCGLVLSDKLVDTR	55	//9	5//28	0.5305	0.928571	K.EFK[2959.52]EANK.I	Spt15	1	TBP	EFKEANK	11	126.128	229728	127.131	214832	367213	250805	237064	0.94521	-0.0812925	-0.0812925
						0	2.16479	JL121323_121323_ABP_127_30B.29456.29456.5	P	12.12	0.346761	0.654	//15	33//185	11.9025	2.1087	R.FSEGDVVC[160.03]ALC[160.03]GLVLSDK[1271.7]LVDTR.S	Sua7	1	TFIIB	FSEGDVVCALCGLVLSDKLVDTR	55	//9	4//35	0.2175	0.642857	K.EFK[2959.52]EANK.I	Spt15	1	TBP	EFKEANK	11	126.127	201017	127.131	199697	372639	219318	220362	1.00476	0.00685293	0.00685293
	17	TBP:11---TFIIB:164	5.2035	-0.109781	0.109781
						-2	2.98957	JL121323_121323_ABP_127_30B.24341.24341.5	N	5.2035	0.16428		1//20	12//156	3.677	0.842105	K.TLK[2214.2]GKSMESIMAASILIGC[160.03]R.R	Sua7	1	TFIIB	TLKGKSMESIMAASILIGCR	164	3//17	10//108	1.5265	0.678571	K.EFK[2572.41]EANKIVFDPNTR.Q	Spt15	1	TBP	EFKEANKIVFDPNTR	11	126.127	353408	127.131	355007	390616	385536	391745	1.0161	0.0230485	0.0230485
						-1	1.76391	JL121323_121323_ABP_127_70B.20616.20616.7	P	4.70175	0.151603	0.0178	//15	11//159	2.20325	0.55	K.TLK[3049.72]GK[425.27]SMESIM[147.04]AASILIGC[160.03]R.R	Sua7	1	TFIIB	TLKGKSMESIMAASILIGCR	164	//11	9//132	2.4985	0.647059	R.LK[425.27]EFK[2885.57]EANK[425.27]IVFDPNTR.Q	Spt15	1	TBP	LKEFKEANKIVFDPNTR	11	126.127	90471.4	127.131	75737.3	420240	98880	83574.9	0.845215	-0.24261	-0.24261
	18	TBP:11---TFIIB:166	2.809	-0.0933757	0.0933757
						0	-5.50681	JL121323_121323_ABP_127_D.26618.26618.5	P	2.809	0.0878087	4.48e-05	//17	6//125	1.234	0.411765	K.GK[2214.19]SM[147.04]ESIM[147.04]AASILIGC[160.03]R.R	Sua7	1	TFIIB	GKSMESIMAASILIGCR	166	//17	9//108	1.575	0.7	K.EFK[2262.16]EANKIVFDPNTR.Q	Spt15	1	TBP	EFKEANKIVFDPNTR	11	126.127	61756.6	127.131	61943	95226.5	67371.8	68353	1.01456	0.0208605	0.0208605
						0	5.54781	JL121323_121323_ABP_127_D.22287.22287.5	P	1.30525	0.0406747	0.653	//17	5//125	0.3075	0.147059	K.GK[2196.18]SMESIM[147.04]AASILIGC[160.03]R.R	Sua7	1	TFIIB	GKSMESIMAASILIGCR	166	//18	7//115	0.99775	0.433333	K.E[111.03]FK[2246.17]EANKIVFDPNTR.Q	Spt15	1	TBP	EFKEANKIVFDPNTR	11	126.127	126310	127.13	108311	184118	138018	119520	0.86597	-0.207612	-0.207612
	19	TBP:138---TFIIB:314	3.2525	0.717362	-0.717362
						0	3.39334	JL121323_121323_ABP_127_50B.06963.06963.5	P	3.2525	0.205907	0.00072	//12	10//66	2.826	1.05	K.SGYK[943.57]ILYEHR.D	Sua7	1	TFIIB	SGYKILYEHR	314	//5	2//26	0.4265	0.5	R.K[1671.92]YAR.I	Spt15	1	TBP	KYAR	138	126.128	57699.4	127.131	93149.2	107254	62516.9	102789	1.64417	0.717362	0.717362
	20	TBP:138---TFIIB:112	1.2885	-0.0285944	0.0285944
						0	12.0532	JL121323_121323_ABP_127_30B.09471.09471.3	P	1.2885	0.0491691	0.52	1//10	5//30	0.37075	0.4375	K.ELNK[943.57]AQGK.N	Sua7	1	TFIIB	ELNKAQGK	112	//5	4//16	0.91775	1.125	R.K[1293.75]YAR.I	Spt15	1	TBP	KYAR	138	126.128	490435	127.131	475515	3.00465e+06	535227	524723	0.980375	-0.0285944	-0.0285944
	21	TBP:138---TFIIB:55	14.569	-0.369289	0.369289
						0	4.97831	JL121323_121323_ABP_127_70B.26734.26734.5	P	14.569	0.456587	0.622	//15	37//188	14.5125	2.43478	R.FSEGDVVC[160.03]ALC[160.03]GLVLSDK[943.57]LVDTR.S	Sua7	1	TFIIB	FSEGDVVCALCGLVLSDKLVDTR	55	//5	1//23	0.0565	0.125	R.K[2959.52]YAR.I	Spt15	1	TBP	KYAR	138	126.128	95972.7	127.131	72248	315858	104991	79724.5	0.759346	-0.39717	-0.39717
						0	2.71682	JL121323_121323_ABP_127_D.26416.26416.4	P	11.8528	0.312692	0.0639	//15	32//141	11.8027	2	R.FSEGDVVC[160.03]ALC[160.03]GLVLSDK[943.57]LVDTR.S	Sua7	1	TFIIB	FSEGDVVCALCGLVLSDKLVDTR	55	//5	1//18	0.05	0.125	R.K[2959.52]YAR.I	Spt15	1	TBP	KYAR	138	126.127	205863	127.131	151506	287857	225250	167184	0.742217	-0.430087	-0.430087
						-1	1.41193	JL121323_121323_ABP_127_D.26405.26405.4	P	11.294	0.302338	5.31e-09	//15	29//141	11.189	1.8913	R.FSEGDVVC[160.03]ALC[160.03]GLVLSDK[943.57]LVDTR.S	Sua7	1	TFIIB	FSEGDVVCALCGLVLSDKLVDTR	55	//5	2//18	0.105	0.25	R.K[2959.52]YAR.I	Spt15	1	TBP	KYAR	138	126.127	193991	127.131	158214	239425	212072	174587	0.823242	-0.280611	-0.280611
	22	TBP:83---TFIIB:322	12.2628	0.175495	-0.175495
						-1	0.389941	JL121323_121323_ABP_127_30B.27527.27527.6	N	12.2628	0.406058		//19	30//145	11.0437	1.80435	R.DK[1643]LVDPQLIANGVVSLDNLPGVEK.K	Sua7	1	TFIIB	DKLVDPQLIANGVVSLDNLPGVEK	322	3//13	8//50	1.219	0.9	R.LDLK[2939.64]TVALHAR.N	Spt15	1	TBP	LDLKTVALHAR	83	126.128	102379	127.131	114163	300302	111548	125977	1.12935	0.175495	0.175495
	23	TBP:83---TFIIB:98	3.0585	-0.138305	0.138305
						0	4.04613	JL121323_121323_ABP_127_30B.09739.09739.4	P	3.0585	0.0982114	0.403	//13	13//52	2.572	1.45455	R.LDLK[1529.8]TVALHAR.N	Spt15	1	TBP	LDLKTVALHAR	83	//12	4//46	0.4865	0.3	R.IGK[1643]GETTDM[147.04]R.F	Sua7	1	TFIIB	IGKGETTDMR	98	126.127	924587	127.131	831466	1.11684e+06	1.00982e+06	917509	0.908586	-0.138305	-0.138305
	24	TBP:83---TFIIB:33	3.959	-0.259159	0.259159
						0	4.18535	JL121323_121323_ABP_127_30B.12406.12406.5	P	3.959	0.155857	0.458	1//13	14//64	3.28825	1.5	R.LDLK[1506.9]TVALHAR.N	Spt15	1	TBP	LDLKTVALHAR	83	//11	7//48	0.67075	0.611111	K.VYPPK[1643]IVER.F	Sua7	1	TFIIB	VYPPKIVER	33	126.128	204937	127.131	169622	807898	224008	187175	0.835575	-0.259159	-0.259159
	25	TBP:83---TFIIB:55	15.5612	-0.261011	0.261011
						0	0.425532	JL121323_121323_ABP_127_D.28012.28012.6	NP	15.5612	0.441047	1.26e-20	//15	36//183	13.5617	2.47826	R.FSEGDVVC[160.03]ALC[160.03]GLVLSDK[1643]LVDTR.S	Sua7	1	TFIIB	FSEGDVVCALCGLVLSDKLVDTR	55	//13	8//62	1.9995	1.13636	R.LDLK[2959.52]TVALHAR.N	Spt15	1	TBP	LDLKTVALHAR	83	126.128	64017.3	127.131	49667.3	167919	70014.9	54807	0.782792	-0.3533	-0.3533
						0	-3.08606	JL121323_121323_ABP_127_70B.28180.28180.6	NP	15.551	0.468143	2.21e-24	//15	35//183	13.529	2.45652	R.FSEGDVVC[160.03]ALC[160.03]GLVLSDK[1643]LVDTR.S	Sua7	1	TFIIB	FSEGDVVCALCGLVLSDKLVDTR	55	//13	9//62	2.022	1.27273	R.LDLK[2959.52]TVALHAR.N	Spt15	1	TBP	LDLKTVALHAR	83	126.127	40722.3	127.131	33588.4	135088	44513.2	37064.3	0.832657	-0.264205	-0.264205
						0	-0.186481	JL121323_121323_ABP_127_D.28019.28019.5	NP	14.6632	0.390006	3.33e-20	//15	38//183	12.9062	2.43478	R.FSEGDVVC[160.03]ALC[160.03]GLVLSDK[1643]LVDTR.S	Sua7	1	TFIIB	FSEGDVVCALCGLVLSDKLVDTR	55	//13	7//62	1.757	1.09091	R.LDLK[2959.52]TVALHAR.N	Spt15	1	TBP	LDLKTVALHAR	83	126.128	299472	127.131	229566	1.0225e+06	327563	253322	0.773353	-0.370801	-0.370801
						-1	2.07628	JL121323_121323_ABP_127_70B.28157.28157.6	NP	14.3443	0.411842	2.65e-20	//15	31//183	12.2345	2.04348	R.FSEGDVVC[160.03]ALC[160.03]GLVLSDK[1643]LVDTR.S	Sua7	1	TFIIB	FSEGDVVCALCGLVLSDKLVDTR	55	1//13	9//62	2.10975	1.18182	R.LDLK[2959.52]TVALHAR.N	Spt15	1	TBP	LDLKTVALHAR	83	126.127	40234.7	127.131	30079.1	98132.4	44017.9	33191.7	0.75405	-0.407267	-0.407267
						0	5.55786	JL121323_121323_ABP_127_30B.31502.31502.6	NP	13.8468	0.409092	0.00901	//15	32//183	12.0917	2.06522	R.FSEGDVVC[160.03]ALC[160.03]GLVLSDK[1643]LVDTR.S	Sua7	1	TFIIB	FSEGDVVCALCGLVLSDKLVDTR	55	1//13	8//62	1.755	1	R.LDLK[2959.52]TVALHAR.N	Spt15	1	TBP	LDLKTVALHAR	83	126.128	75771.3	127.131	56503.1	174570	82897.8	62350.2	0.752134	-0.410939	-0.410939
						0	-1.91226	JL121323_121323_ABP_127_50B.32586.32586.5	NP	13.3837	0.372231	0.000247	//15	35//183	11.9055	2.23913	R.FSEGDVVC[160.03]ALC[160.03]GLVLSDK[1643]LVDTR.S	Sua7	1	TFIIB	FSEGDVVCALCGLVLSDKLVDTR	55	//13	7//62	1.47825	0.954545	R.LDLK[2959.52]TVALHAR.N	Spt15	1	TBP	LDLKTVALHAR	83	126.128	143913	127.131	129217	285935	157182	142589	0.907155	-0.140579	-0.140579
						-1	0.313207	JL121323_121323_ABP_127_70B.28145.28145.6	N	12.171	0.366607		//15	27//136	10.2345	2.09091	R.FSEGDVVC[160.03]ALC[160.03]GLVLSDK[1643]LVDTR.S	Sua7	1	TFIIB	FSEGDVVCALCGLVLSDKLVDTR	55	1//13	10//50	1.9365	1.45	R.LDLK[2959.52]TVALHAR.N	Spt15	1	TBP	LDLKTVALHAR	83	126.128	34839.5	127.131	29691.6	90984.7	38071.1	32764.2	0.860606	-0.216576	-0.216576
						-1	6.73166	JL121323_121323_ABP_127_30B.31512.31512.5	NP	11.2668	0.348686	0.00714	//15	32//183	10.0258	1.82609	R.FSEGDVVC[160.03]ALC[160.03]GLVLSDK[1643]LVDTR.S	Sua7	1	TFIIB	FSEGDVVCALCGLVLSDKLVDTR	55	//13	7//62	1.241	0.818182	R.LDLK[2959.52]TVALHAR.N	Spt15	1	TBP	LDLKTVALHAR	83	126.127	147563	127.131	130133	245650	161198	143600	0.890831	-0.166777	-0.166777
						-3	-0.966835	JL121323_121323_ABP_127_70B.28152.28152.5	NP	11.2637	0.312717	8.23e-15	//15	29//183	10.012	1.95652	R.FSEGDVVC[160.03]ALC[160.03]GLVLSDK[1643]LVDTR.S	Sua7	1	TFIIB	FSEGDVVCALCGLVLSDKLVDTR	55	//13	7//62	1.25175	0.772727	R.LDLK[2959.52]TVALHAR.N	Spt15	1	TBP	LDLKTVALHAR	83	126.127	73069.9	127.13	68270.5	180921	79774.8	75335.4	0.94435	-0.082606	-0.082606
						-1	8.90765	JL121323_121323_ABP_127_70B.28142.28142.5	P	7.9345	0.232632	6.29e-14	//15	23//183	7.43775	1.45652	R.FSEGDVVC[160.03]ALC[160.03]GLVLSDK[1643]LVDTR.S	Sua7	1	TFIIB	FSEGDVVCALCGLVLSDKLVDTR	55	//13	6//62	0.49675	0.363636	R.LDLK[2959.52]TVALHAR.N	Spt15	1	TBP	LDLKTVALHAR	83	126.127	58860	127.131	50839.5	127308	64311.5	56100.5	0.872325	-0.197063	-0.197063
	26	TBP:83---TFIIB:9	3.71675	-0.352668	0.352668
						0	4.47855	JL121323_121323_ABP_127_30B.10231.10231.5	P	3.71675	0.155461	0.596	1//13	13//68	3.6655	1.36364	R.LDLK[1153.65]TVALHAR.N	Spt15	1	TBP	LDLKTVALHAR	83	//8	3//31	0.05125	0.416667	R.ESIDK[1643]R.A	Sua7	1	TFIIB	ESIDKR	9	126.128	348329	127.131	270365	1.56379e+06	380961	298344	0.783135	-0.352668	-0.352668
	27	TBP:35---TFIIB:33	8.73275	0.141767	-0.141767
						0	2.71826	JL121323_121323_ABP_127_30B.09312.09312.6	P	8.73275	0.382186	0.000505	//19	22//129	7.849	2.05882	R.DGTK[1506.9]PATTFQSEEDIKR.A	Spt15	1	TBP	DGTKPATTFQSEEDIKR	35	//11	5//48	0.88375	0.722222	K.VYPPK[2329.2]IVER.F	Sua7	1	TFIIB	VYPPKIVER	33	126.128	150234	127.131	169995	288306	163659	187587	1.1462	0.196864	0.196864
						0	3.93869	JL121323_121323_ABP_127_30B.09373.09373.6	P	7.51825	0.299073	0.00206	//19	22//129	7.33975	1.97059	R.DGTK[1506.9]PATTFQSEEDIKR.A	Spt15	1	TBP	DGTKPATTFQSEEDIKR	35	//11	3//48	0.1785	0.166667	K.VYPPK[2329.2]IVER.F	Sua7	1	TFIIB	VYPPKIVER	33	126.128	140304	127.131	159025	159025	152839	175482	1.14815	0.199306	0.199306
						0	2.9072	JL121323_121323_ABP_127_30B.09330.09330.5	NP	6.3125	0.249407	0.0112	//19	21//129	5.128	1.44118	R.DGTK[1506.9]PATTFQSEEDIKR.A	Spt15	1	TBP	DGTKPATTFQSEEDIKR	35	//11	7//48	1.1845	0.777778	K.VYPPK[2329.2]IVER.F	Sua7	1	TFIIB	VYPPKIVER	33	126.128	588462	127.131	593594	943460	641927	655021	1.0204	0.0291313	0.0291313
	28	TBP:35---TFIIB:108	10.7625	0.478225	-0.478225
						-1	2.74161	JL121323_121323_ABP_127_30B.08289.08289.3	NP	10.7625	0.526541	0.00463	//19	22//73	8.11	1.73529	R.DGTK[1285.75]PATTFQSEEDIKR.A	Spt15	1	TBP	DGTKPATTFQSEEDIKR	35	//9	8//21	2.6525	1.5	R.FTK[2329.2]ELNK.A	Sua7	1	TFIIB	FTKELNK	108	126.127	51637	127.131	85587.8	782742	55921.3	94444.7	1.68889	0.756072	0.756072
						-1	2.74161	JL121323_121323_ABP_127_30B.08276.08276.3	NP	10.5542	0.453537	0.0244	//19	23//73	8.41725	1.82353	R.DGTK[1285.75]PATTFQSEEDIKR.A	Spt15	1	TBP	DGTKPATTFQSEEDIKR	35	//9	6//21	2.137	1.14286	R.FTK[2329.2]ELNK.A	Sua7	1	TFIIB	FTKELNK	108	126.127	44009.6	127.131	65852.8	455077	47747.2	72667.4	1.52192	0.605892	0.605892
						0	3.16901	JL121323_121323_ABP_127_30B.08271.08271.5	P	9.46975	0.352862	0.0471	//19	27//131	9.268	2.29412	R.DGTK[1285.75]PATTFQSEEDIKR.A	Spt15	1	TBP	DGTKPATTFQSEEDIKR	35	//9	3//35	0.20175	0.357143	R.FTK[2329.2]ELNK.A	Sua7	1	TFIIB	FTKELNK	108	126.127	127809	127.13	154448	407775	139111	170431	1.22514	0.292951	0.292951
						0	0.489095	JL121323_121323_ABP_127_30B.08307.08307.6	P	8.60725	0.351711	0.000745	//19	22//131	7.93675	1.97059	R.DGTK[1285.75]PATTFQSEEDIKR.A	Spt15	1	TBP	DGTKPATTFQSEEDIKR	35	//9	4//35	0.6705	0.642857	R.FTK[2329.2]ELNK.A	Sua7	1	TFIIB	FTKELNK	108	126.128	65848.6	127.131	77692.8	155345	71694.4	85732.8	1.19581	0.257987	0.257987
	29	TBP:35---TFIIB:121	13.254	0.980747	-0.980747
						0	0.829257	JL121323_121323_ABP_127_30B.06923.06923.4	P	13.254	0.505502	0.0622	//19	32//103	12.4008	2.94118	R.DGTK[1156.64]PATTFQSEEDIKR.A	Spt15	1	TBP	DGTKPATTFQSEEDIKR	35	//8	6//23	0.85325	0.916667	K.NVM[147.04]DK[2329.2]K.D	Sua7	1	TFIIB	NVMDKK	121	126.127	18460.4	127.131	39162.5	293463	19888	43215.2	2.17293	1.11964	1.11964
						0	1.3626	JL121323_121323_ABP_127_30B.06918.06918.5	P	10.9785	0.430927	0.011	//19	28//132	10.6578	2.55882	R.DGTK[1156.64]PATTFQSEEDIKR.A	Spt15	1	TBP	DGTKPATTFQSEEDIKR	35	//8	3//29	0.32075	0.416667	K.NVM[147.04]DK[2329.2]K.D	Sua7	1	TFIIB	NVMDKK	121	126.127	29874.1	127.13	45153.1	117435	32405.8	49825.7	1.53756	0.620639	0.620639
						0	-1.73137	JL121323_121323_ABP_127_30B.06928.06928.3	NP	6.36525	0.413771	0.025	//19	13//74	4.62625	0.882353	R.DGTK[1156.64]PATTFQSEEDIKR.A	Spt15	1	TBP	DGTKPATTFQSEEDIKR	35	//8	6//17	1.739	1.08333	K.NVM[147.04]DK[2329.2]K.D	Sua7	1	TFIIB	NVMDKK	121	126.127	10513	127.13	23579.7	218211	11310.4	26019.8	2.30052	1.20196	1.20196
	30	TBP:35---TFIIB:314	13.2048	0.05545	-0.05545
						0	4.7846	JL121323_121323_ABP_127_30B.09126.09126.4	NP	13.2048	0.413611	0.0231	//19	30//98	11.2935	2.44118	R.DGTK[1671.92]PATTFQSEEDIKR.A	Spt15	1	TBP	DGTKPATTFQSEEDIKR	35	2//12	9//47	1.91125	1.15	K.SGYK[2329.2]ILYEHR.D	Sua7	1	TFIIB	SGYKILYEHR	314	126.127	190216	127.131	201852	353640	207377	222740	1.07408	0.103108	0.103108
						0	0.767141	JL121323_121323_ABP_127_30B.09133.09133.4	N	10.5732	0.366592		//19	29//98	9.2345	2.375	R.DGTK[1671.92]PATTFQSEEDIKR.A	Spt15	1	TBP	DGTKPATTFQSEEDIKR	35	//12	6//47	1.33875	0.722222	K.SGYK[2329.2]ILYEHR.D	Sua7	1	TFIIB	SGYKILYEHR	314	126.127	305368	127.131	303558	738844	333167	334972	1.00542	0.00779231	0.00779231
	31	TBP:35---TFIIB:217	7.93125	0.150986	-0.150986
						-1	4.62333	JL121323_121323_ABP_127_30B.09134.09134.3	N	7.93125	0.251438		//19	18//72	5.3055	1.3125	R.DGTK[1386.77]PATTFQSEEDIKR.A	Spt15	1	TBP	DGTKPATTFQSEEDIKR	35	//9	8//28	2.62575	1.3125	R.GK[2329.21]SEDGFLK.I	Sua7	1	TFIIB	GKSEDGFLK	217	126.128	93417.5	127.131	102437	424015	101805	113037	1.11033	0.150986	0.150986
	32	TBP:35---TFIIB:9	13.3665	0.0807964	-0.0807964
						0	3.88424	JL121323_121323_ABP_127_30B.07646.07646.4	P	13.3665	0.451525	0.612	//19	33//103	12.9808	3.11765	R.DGTK[1153.65]PATTFQSEEDIKR.A	Spt15	1	TBP	DGTKPATTFQSEEDIKR	35	2//8	6//23	0.38575	0.5	R.ESIDK[2329.2]R.A	Sua7	1	TFIIB	ESIDKR	9	126.128	129871	127.132	109442	782022	141932	120768	0.850881	-0.23297	-0.23297
						0	2.3933	JL121323_121323_ABP_127_30B.07466.07466.4	P	12.5252	0.364864	0.0575	//19	34//103	12.1508	3.02941	R.DGTK[1153.65]PATTFQSEEDIKR.A	Spt15	1	TBP	DGTKPATTFQSEEDIKR	35	2//8	6//23	0.3745	0.666667	R.ESIDK[2329.2]R.A	Sua7	1	TFIIB	ESIDKR	9	126.128	253692	127.132	292381	2.50345e+06	276298	322637	1.16772	0.223688	0.223688
						0	2.61658	JL121323_121323_ABP_127_30B.07470.07470.5	P	10.746	0.367749	0.334	//19	30//132	10.6495	2.67647	R.DGTK[1153.65]PATTFQSEEDIKR.A	Spt15	1	TBP	DGTKPATTFQSEEDIKR	35	2//8	3//29	0.0965	0.25	R.ESIDK[2329.2]R.A	Sua7	1	TFIIB	ESIDKR	9	126.128	603022	127.131	708420	2723778	656593	781730	1.19059	0.251671	0.251671
	33	TBP:35---TFIIB:55	9.51425	0.0665509	-0.0665509
						-1	5.35623	JL121323_121323_ABP_127_30B.28831.28831.4	N	9.51425	0.220851		1//15	26//136	8.42425	1.56818	R.FSEGDVVC[160.03]ALC[160.03]GLVLSDK[2329.23]LVDTR.S	Sua7	1	TFIIB	FSEGDVVCALCGLVLSDKLVDTR	55	//19	10//97	1.09	0.65625	R.DGTK[2959.55]PATTFQSEEDIKR.A	Spt15	1	TBP	DGTKPATTFQSEEDIKR	35	126.128	108036	127.131	115562	367977	117771	127521	1.08278	0.114743	0.114743
						-1	2.54611	JL121323_121323_ABP_127_50B.30131.30131.6	NP	9.1645	0.269085	0.000922	//15	31//183	7.477	1.67391	R.FSEGDVVC[160.03]ALC[160.03]GLVLSDK[2329.2]LVDTR.S	Sua7	1	TFIIB	FSEGDVVCALCGLVLSDKLVDTR	55	//19	15//126	1.6875	0.735294	R.DGTK[2959.52]PATTFQSEEDIKR.A	Spt15	1	TBP	DGTKPATTFQSEEDIKR	35	126.127	155592	127.131	161042	194306	169678	177707	1.04732	0.0666997	0.0666997
						-1	6.429	JL121323_121323_ABP_127_50B.30068.30068.6	N	8.07125	0.249267		//15	20//136	4.2025	1.06818	R.FSEGDVVC[160.03]ALC[160.03]GLVLSDK[2329.23]LVDTR.S	Sua7	1	TFIIB	FSEGDVVCALCGLVLSDKLVDTR	55	1//19	19//97	3.86875	1.34375	R.DGTK[2959.55]PATTFQSEEDIKR.A	Spt15	1	TBP	DGTKPATTFQSEEDIKR	35	126.127	150010	127.131	150190	309318	163653	165732	1.0127	0.0182098	0.0182098
	34	TBP:35---TFIIB:98	15.6562	0.428112	-0.428112
						0	2.40152	JL121323_121323_ABP_127_30B.07356.07356.4	NP	15.6562	0.492614	0.00118	//19	35//100	14.2523	3.17647	R.DGTK[1529.8]PATTFQSEEDIKR.A	Spt15	1	TBP	DGTKPATTFQSEEDIKR	35	//12	7//43	1.404	1	R.IGK[2329.2]GETTDM[147.04]R.F	Sua7	1	TFIIB	IGKGETTDMR	98	126.127	223022	127.131	243583	3264729	243059	268790	1.10586	0.145175	0.145175
						0	3.79319	JL121323_121323_ABP_127_30B.07345.07345.5	NP	13.6442	0.501931	2.22e-08	//19	37//129	12.0922	2.94118	R.DGTK[1529.8]PATTFQSEEDIKR.A	Spt15	1	TBP	DGTKPATTFQSEEDIKR	35	//12	11//53	1.552	1.05	R.IGK[2329.2]GETTDM[147.04]R.F	Sua7	1	TFIIB	IGKGETTDMR	98	126.128	101372	127.131	158156	865614	109902	174522	1.58798	0.667188	0.667188
						0	2.76081	JL121323_121323_ABP_127_30B.07367.07367.6	NP	13.431	0.542645	2.9e-07	//19	31//129	11.3095	2.70588	R.DGTK[1529.8]PATTFQSEEDIKR.A	Spt15	1	TBP	DGTKPATTFQSEEDIKR	35	//12	7//53	2.1215	1.2	R.IGK[2329.2]GETTDM[147.04]R.F	Sua7	1	TFIIB	IGKGETTDMR	98	126.127	59640.4	127.131	68681.1	258655	64955.5	75788.5	1.16677	0.222526	0.222526
						0	2.23225	JL121323_121323_ABP_127_1ug.07672.07672.5	NP	13.371	0.56543	2e-11	//19	36//129	11.283	3	R.DGTK[1529.8]PATTFQSEEDIKR.A	Spt15	1	TBP	DGTKPATTFQSEEDIKR	35	//12	11//53	2.088	1.2	R.IGK[2329.2]GETTDM[147.04]R.F	Sua7	1	TFIIB	IGKGETTDMR	98	126.128	32698.4	127.131	39532.6	162879	35589.6	43623.6	1.22574	0.293654	0.293654
						0	2.59953	JL121323_121323_ABP_127_30B.07342.07342.5	NP	13.3268	0.479543	6.19e-07	//19	36//129	11.859	3.05882	R.DGTK[1529.8]PATTFQSEEDIKR.A	Spt15	1	TBP	DGTKPATTFQSEEDIKR	35	//12	11//53	1.46775	0.95	R.IGK[2329.2]GETTDM[147.04]R.F	Sua7	1	TFIIB	IGKGETTDMR	98	126.128	88572.7	127.131	130923	959781	96114.6	144471	1.50311	0.587954	0.587954
						0	2.62649	JL121323_121323_ABP_127_30B.07359.07359.3	N	7.255	0.349959		//19	17//71	4.9485	1.46875	R.DGTK[1529.8]PATTFQSEEDIKR.A	Spt15	1	TBP	DGTKPATTFQSEEDIKR	35	//12	8//33	2.3065	0.833333	R.IGK[2329.21]GETTDM[147.04]R.F	Sua7	1	TFIIB	IGKGETTDMR	98	126.128	58390.7	127.131	90171.4	1.4009e+06	63315.7	99502.7	1.57153	0.652173	0.652173
	35	TBP:8---TFIIB:9	2.5645	0.182472	-0.182472
						0	1.49281	JL121323_121323_ABP_127_30B.06679.06679.3	P	2.5645	0.141544	0.618	//8	5//21	0.31275	0.416667	R.ESIDK[1070.66]R.A	Sua7	1	TFIIB	ESIDKR	9	1//5	7//17	2.25175	1.7	R.LK[1153.65]EFK.E	Spt15	1	TBP	LKEFK	8	126.127	64337.4	127.131	72086.4	254757	70095.5	79546.2	1.13483	0.182472	0.182472
4	TFIIA1---TFIIA2
	1	TFIIA1:263---TFIIA2:119	3.32075	-0.16517	0.16517
						0	4.51143	JL121323_121323_ABP_127_1ug.08799.08799.4	P	3.32075	0.113053	0.0294	//15	10//65	2.599	1.04167	K.C[160.03]SLK[1325.76]DGVVTINR.N	Toa1	1	TFIIA1	CSLKDGVVTINR	263	//10	5//33	0.72175	0.5625	R.IVAC[160.03]NSK[1767.97]K.S	Toa2	1	TFIIA2	IVACNSKK	119	126.128	76934.8	127.131	67922.3	76934.8	84042.6	74951.1	0.891823	-0.16517	-0.16517
	2	TFIIA1:263---TFIIA2:53	6.15525	-0.0648689	0.0648689
						-1	3.59809	JL121323_121323_ABP_127_30B.11356.11356.5	NP	6.15525	0.230728	0.301	//16	13//102	2.33975	1.07143	R.WK[425.27]C[160.03]SLK[1839.02]DGVVTINR.N	Toa1	1	TFIIA1	WKCSLKDGVVTINR	263	//15	14//83	3.8155	1.57692	K.VVAETLK[2379.33]DNTQSK.L	Toa2	1	TFIIA2	VVAETLKDNTQSK	53	126.128	939144	127.131	908675	2.116e+06	1.02494e+06	1.00271e+06	0.978308	-0.0316388	-0.0316388
						0	-3.23867	JL121323_121323_ABP_127_1ug.10954.10954.4	NP	4.98025	0.181744	1.3e-05	//15	13//66	2.25975	1.42308	K.VVAETLK[1767.97]DNTQSK.L	Toa2	1	TFIIA2	VVAETLKDNTQSK	53	1//15	14//61	2.7205	1.58333	K.C[160.03]SLK[1839.02]DGVVTINR.N	Toa1	1	TFIIA1	CSLKDGVVTINR	263	126.128	221227	127.131	204511	758626	241553	225674	0.934263	-0.0980989	-0.0980989
	3	TFIIA1:250---TFIIA2:119	20.781	-0.0154625	0.0154625
						0	4.80967	JL121323_121323_ABP_127_70B.23724.23724.5	P	20.781	0.431468	3.25e-06	//14	50//375	20.565	1.80682	R.SALLDTDEVGSELDDSDDDYLISEGEEDGPDENLM[147.04]LC[160.03]LYDK[1325.76]VTR.T	Toa1	1	TFIIA1	SALLDTDEVGSELDDSDDDYLISEGEEDGPDENLMLCLYDKVTR	250	//10	2//40	0.216	0.25	R.IVAC[160.03]NSK[5373.42]K.S	Toa2	1	TFIIA2	IVACNSKK	119	126.127	133437	127.13	135475	885824	145550	149494	1.0271	0.0385725	0.0385725
						0	7.58227	JL121323_121323_ABP_127_50B.27126.27126.5	P	17.8622	0.407688	0.356	//14	47//375	17.62	1.60227	R.SALLDTDEVGSELDDSDDDYLISEGEEDGPDENLM[147.04]LC[160.03]LYDK[1325.76]VTR.T	Toa1	1	TFIIA1	SALLDTDEVGSELDDSDDDYLISEGEEDGPDENLMLCLYDKVTR	250	//10	3//40	0.24225	0.3125	R.IVAC[160.03]NSK[5373.42]K.S	Toa2	1	TFIIA2	IVACNSKK	119	126.127	199415	127.131	176756	884111	217830	195047	0.895411	-0.159379	-0.159379
						0	2.24693	JL121323_121323_ABP_127_30B.30638.30638.5	P	17.5933	0.360876	0.603	1//14	48//375	17.376	1.52273	R.SALLDTDEVGSELDDSDDDYLISEGEEDGPDENLMLC[160.03]LYDK[1325.76]VTR.T	Toa1	1	TFIIA1	SALLDTDEVGSELDDSDDDYLISEGEEDGPDENLMLCLYDKVTR	250	//10	3//40	0.21725	0.3125	R.IVAC[160.03]NSK[5357.42]K.S	Toa2	1	TFIIA2	IVACNSKK	119	126.128	53157.9	127.131	50918	206831	58020.5	56187.2	0.968404	-0.0463193	-0.0463193
						-3	4.98791	JL121323_121323_ABP_127_70B.23607.23607.5	P	14.701	0.384481	0.318	1//14	40//375	14.6005	1.27273	R.SALLDTDEVGSELDDSDDDYLISEGEEDGPDENLM[147.04]LC[160.03]LYDK[1325.76]VTR.T	Toa1	1	TFIIA1	SALLDTDEVGSELDDSDDDYLISEGEEDGPDENLMLCLYDKVTR	250	//10	2//40	0.1005	0.125	R.IVAC[160.03]NSK[5373.42]K.S	Toa2	1	TFIIA2	IVACNSKK	119	126.127	45920.3	127.131	49007	104390	50059.8	54078.4	1.08028	0.111401	0.111401
						-1	-1.8644	JL121323_121323_ABP_127_100B.20237.20237.5	P	13.9723	0.374531	0.0226	//14	37//375	13.4767	1.19318	R.SALLDTDEVGSELDDSDDDYLISEGEEDGPDENLM[147.04]LC[160.03]LYDK[1325.76]VTR.T	Toa1	1	TFIIA1	SALLDTDEVGSELDDSDDDYLISEGEEDGPDENLMLCLYDKVTR	250	1//10	4//40	0.4955	0.375	R.IVAC[160.03]NSK[5373.42]K.S	Toa2	1	TFIIA2	IVACNSKK	119	126.128	31203.4	127.131	31891.3	99168.1	34033.4	35191.6	1.03403	0.0482783	0.0482783
						0	6.29499	JL121323_121323_ABP_127_100B.20225.20225.5	P	12.2108	0.314127	0.167	1//14	37//375	11.9298	1.10227	R.SALLDTDEVGSELDDSDDDYLISEGEEDGPDENLM[147.04]LC[160.03]LYDK[1325.76]VTR.T	Toa1	1	TFIIA1	SALLDTDEVGSELDDSDDDYLISEGEEDGPDENLMLCLYDKVTR	250	//10	2//40	0.281	0.25	R.IVAC[160.03]NSK[5373.42]K.S	Toa2	1	TFIIA2	IVACNSKK	119	126.128	27875.8	127.131	25996.3	63642.2	30434.3	28686.5	0.94257	-0.0853283	-0.0853283
	4	TFIIA1:2---TFIIA2:46	6.7435	0.0880977	-0.0880977
						0	1.12616	JL121323_121323_ABP_127_100B.21059.21059.3	P	6.7435	0.187739	0.00073	//16	16//56	6.65425	1.64286	R.VLETFDK[1140.6]VVAETLK.D	Toa2	1	TFIIA2	VLETFDKVVAETLK	46	//8	3//23	0.08925	0.214286	M.S[1957.09]NAEASR.V	Toa1	1	TFIIA1	SNAEASR	2	126.128	87027.8	127.131	111505	122690	94646.5	123044	1.30004	0.378558	0.378558
						0	1.26682	JL121323_121323_ABP_127_1ug.21922.21922.3	P	6.1995	0.14869	0.49	//16	12//56	6.1665	1.10714	R.VLETFDK[1140.6]VVAETLK.D	Toa2	1	TFIIA2	VLETFDKVVAETLK	46	//8	1//23	0.033	0.0714286	M.S[1957.09]NAEASR.V	Toa1	1	TFIIA1	SNAEASR	2	126.128	86383.1	127.131	130884	130884	93699.7	144428	1.5414	0.624237	0.624237
						-1	-3.1173	JL121323_121323_ABP_127_70B.24388.24388.3	P	6.1115	0.165448	0.0337	2//16	13//56	6.063	1.21429	R.VLETFDK[1140.6]VVAETLK.D	Toa2	1	TFIIA2	VLETFDKVVAETLK	46	1//8	2//23	0.0485	0.142857	M.S[1957.09]NAEASR.V	Toa1	1	TFIIA1	SNAEASR	2	126.128	251251	127.131	279792	279792	273758	308746	1.12781	0.173518	0.173518
						-2	-0.257069	JL121323_121323_ABP_127_70B.24391.24391.3	P	6.10175	0.182286	4.8e-11	1//16	11//56	5.94825	1.17857	R.VLETFDK[1140.6]VVAETLK.D	Toa2	1	TFIIA2	VLETFDKVVAETLK	46	1//8	3//23	0.1535	0.357143	M.S[1957.09]NAEASR.V	Toa1	1	TFIIA1	SNAEASR	2	126.128	240296	127.131	274036	274036	261743	302395	1.15531	0.208281	0.208281
						0	-7.73587	JL121323_121323_ABP_127_100B.20991.20991.3	P	5.628	0.137163	0.000558	//16	13//56	5.49225	1.10714	R.VLETFDK[1140.6]VVAETLK.D	Toa2	1	TFIIA2	VLETFDKVVAETLK	46	//8	2//23	0.13575	0.142857	M.S[1957.09]NAEASR.V	Toa1	1	TFIIA1	SNAEASR	2	126.128	82748.4	127.131	91198.7	91198.7	90172.7	100636	1.11604	0.158388	0.158388
						0	-2.46085	JL121323_121323_ABP_127_D.23295.23295.3	P	4.09675	0.118822	0.0566	2//16	12//56	4.0895	1	R.VLETFDK[1140.6]VVAETLK.D	Toa2	1	TFIIA2	VLETFDKVVAETLK	46	//8	1//23	0.00725	0.0714286	M.S[1957.09]NAEASR.V	Toa1	1	TFIIA1	SNAEASR	2	126.128	346966	127.131	342555	346966	378581	378004	0.998475	-0.00220164	-0.00220164
						0	-0.491514	JL121323_121323_ABP_127_100B.20379.20379.3	P	3.752	0.113247	0.0239	2//16	12//56	3.642	1.10714	R.VLETFDK[1140.6]VVAETLK.D	Toa2	1	TFIIA2	VLETFDKVVAETLK	46	//8	2//23	0.11	0.285714	M.S[1957.09]NAEASR.V	Toa1	1	TFIIA1	SNAEASR	2	126.128	228160	127.131	178706	697463	249516	197199	0.790326	-0.33948	-0.33948
						-3	2.32183	JL121323_121323_ABP_127_D.23309.23309.3	P	3.155	0.0876365	0.11	3//16	13//56	3.11375	1.10714	R.VLETFDK[1140.6]VVAETLK.D	Toa2	1	TFIIA2	VLETFDKVVAETLK	46	//8	1//23	0.04125	0.0714286	M.S[1957.09]NAEASR.V	Toa1	1	TFIIA1	SNAEASR	2	126.128	402596	127.131	376721	424290	439531	415706	0.945794	-0.0804015	-0.0804015
						0	-0.491514	JL121323_121323_ABP_127_100B.20367.20367.3	P	2.85575	0.0867126	0.00821	1//16	11//56	2.84225	0.964286	R.VLETFDK[1140.6]VVAETLK.D	Toa2	1	TFIIA2	VLETFDKVVAETLK	46	//8	1//23	0.0135	0.0714286	M.S[1957.09]NAEASR.V	Toa1	1	TFIIA1	SNAEASR	2	126.128	156646	127.131	123662	353521	171296	136459	0.79663	-0.328019	-0.328019
	5	TFIIA1:194---TFIIA2:119	3.555	0.0965699	-0.0965699
						0	5.35452	JL121323_121323_ABP_127_1ug.05996.05996.4	N	3.555	0.189353		1//9	8//44	1.9865	1.3125	K.EK[1325.77]EQIEQVK.L	Toa1	1	TFIIA1	EKEQIEQVK	194	//10	5//35	1.5685	0.714286	R.IVAC[160.03]NSK[1536.87]K.S	Toa2	1	TFIIA2	IVACNSKK	119	126.127	18380.7	127.131	18515.4	30491	20051	20431.4	1.01897	0.0271162	0.0271162
						0	0.77614	JL121323_121323_ABP_127_30B.06263.06263.4	N	3.4635	0.223401		//11	5//59	1.0375	0.6	R.K[1325.75]EK[425.27]EQIEQVK.L	Toa1	1	TFIIA1	KEKEQIEQVK	194	//10	9//32	2.426	1.35714	R.IVAC[160.03]NSK[1962.13]K.S	Toa2	1	TFIIA2	IVACNSKK	119	126.127	23520.2	127.131	26057.9	231939	25628.8	28754.5	1.12196	0.166024	0.166024
	6	TFIIA1:259---TFIIA2:59	9.80525	-0.0491487	0.0491487
						-1	1.03354	JL121323_121323_ABP_127_30B.10198.10198.5	NP	9.80525	0.3286	0.175	//14	22//97	8.46775	2.25	R.WK[1539.87]C[160.03]SLKDGVVTINR.N	Toa1	1	TFIIA1	WKCSLKDGVVTINR	259	1//12	9//54	1.3375	0.95	K.DNTQSK[2082.15]LTVK.G	Toa2	1	TFIIA2	DNTQSKLTVK	59	126.127	646252	127.131	607096	1.09924e+06	705512	669921	0.949553	-0.0746797	-0.0746797
						0	3.03457	JL121323_121323_ABP_127_30B.08365.08365.3	NP	8.7595	0.304207	0.0126	//12	16//40	5.3965	2.4	K.DNTQSK[1227.69]LTVK.G	Toa2	1	TFIIA2	DNTQSKLTVK	59	//6	8//20	3.363	2	R.WK[1539.87]C[160.03]SLK.D	Toa1	1	TFIIA1	WKCSLK	259	126.128	515370	127.131	491325	3.67995e+06	562541	542169	0.963785	-0.0532172	-0.0532172
						-2	4.1391	JL121323_121323_ABP_127_30B.09502.09502.3	N	7.45675	0.253024		//19	16//71	6.36425	1.4375	K.VVAETLKDNTQSK[1227.68]LTVK.G	Toa2	1	TFIIA2	VVAETLKDNTQSKLTVK	59	//6	4//17	1.0925	1.2	R.WK[2280.3]C[160.03]SLK.D	Toa1	1	TFIIA1	WKCSLK	259	126.128	214224	127.131	222900	735814	233605	245967	1.05292	0.0743914	0.0743914
						0	-2.20507	JL121323_121323_ABP_127_30B.10197.10197.4	NP	7.3285	0.307655	0.0129	//14	20//77	5.45475	1.89286	R.WK[1539.87]C[160.03]SLKDGVVTINR.N	Toa1	1	TFIIA1	WKCSLKDGVVTINR	259	1//12	12//44	1.87375	1.1	K.DNTQSK[2082.15]LTVK.G	Toa2	1	TFIIA2	DNTQSKLTVK	59	126.128	762675	127.131	751051	2.97235e+06	832191	828772	0.995892	-0.0059391	-0.0059391
						-2	9.95154	JL121323_121323_ABP_127_30B.10178.10178.5	NP	6.661	0.253496	0.186	//14	15//97	5.72175	1.35714	R.WK[1539.87]C[160.03]SLKDGVVTINR.N	Toa1	1	TFIIA1	WKCSLKDGVVTINR	259	//12	7//54	0.93925	0.85	K.DNTQSK[2082.15]LTVK.G	Toa2	1	TFIIA2	DNTQSKLTVK	59	126.127	564390	127.131	510329	564390	616385	563139	0.913616	-0.13034	-0.13034
						0	1.93197	JL121323_121323_ABP_127_30B.10194.10194.3	NP	6.34775	0.21124	0.161	//14	16//57	4.13675	1.35714	R.WK[1539.87]C[160.03]SLKDGVVTINR.N	Toa1	1	TFIIA1	WKCSLKDGVVTINR	259	1//12	12//34	2.211	1.35	K.DNTQSK[2082.15]LTVK.G	Toa2	1	TFIIA2	DNTQSKLTVK	59	126.128	208886	127.131	188439	771321	228135	207939	0.911476	-0.133723	-0.133723
						0	1.79818	JL121323_121323_ABP_127_30B.08368.08368.4	NP	6.12275	0.236377	0.136	//12	12//50	4.92025	1.65	K.DNTQSK[1227.69]LTVK.G	Toa2	1	TFIIA2	DNTQSKLTVK	59	//6	5//26	1.2025	1.33333	R.WK[1539.87]C[160.03]SLK.D	Toa1	1	TFIIA1	WKCSLK	259	126.128	533000	127.131	488868	1.26606e+06	582019	539458	0.926874	-0.109555	-0.109555
						0	1.93197	JL121323_121323_ABP_127_30B.10205.10205.3	NP	6.0715	0.240995	0.0996	//14	13//57	3.74225	1.03571	R.WK[1539.87]C[160.03]SLKDGVVTINR.N	Toa1	1	TFIIA1	WKCSLKDGVVTINR	259	//12	9//34	2.32925	1.05	K.DNTQSK[2082.15]LTVK.G	Toa2	1	TFIIA2	DNTQSKLTVK	59	126.128	286441	127.131	270631	1.88606e+06	312688	298637	0.955062	-0.0663337	-0.0663337
						0	2.01693	JL121323_121323_ABP_127_1ug.08833.08833.4	NP	5.31775	0.214689	0.0042	//12	11//50	4.18625	1.45	K.DNTQSK[1227.69]LTVK.G	Toa2	1	TFIIA2	DNTQSKLTVK	59	//6	5//26	1.1315	1.08333	R.WK[1539.87]C[160.03]SLK.D	Toa1	1	TFIIA1	WKCSLK	259	126.127	407756	127.13	386993	956229	445098	427041	0.95943	-0.0597507	-0.0597507
						0	0.819783	JL121323_121323_ABP_127_1ug.08803.08803.3	NP	4.98775	0.167189	0.0644	//12	13//40	2.99225	1.65	K.DNTQSK[1227.69]LTVK.G	Toa2	1	TFIIA2	DNTQSKLTVK	59	//6	7//20	1.9955	1.66667	R.WK[1539.87]C[160.03]SLK.D	Toa1	1	TFIIA1	WKCSLK	259	126.127	207785	127.131	204581	1.38449e+06	226724	225752	0.995713	-0.00619851	-0.00619851
						-1	0.405078	JL121323_121323_ABP_127_30B.10183.10183.4	NP	4.86	0.202315	0.312	//14	15//77	3.785	1.25	R.WK[1539.87]C[160.03]SLKDGVVTINR.N	Toa1	1	TFIIA1	WKCSLKDGVVTINR	259	1//12	7//44	1.075	0.85	K.DNTQSK[2082.15]LTVK.G	Toa2	1	TFIIA2	DNTQSKLTVK	59	126.128	672123	127.131	672313	1.71001e+06	733258	741887	1.01177	0.0168775	0.0168775
						0	-2.20507	JL121323_121323_ABP_127_30B.10186.10186.4	NP	4.50625	0.187366	0.38	//14	12//77	3.07825	0.857143	R.WK[1539.87]C[160.03]SLKDGVVTINR.N	Toa1	1	TFIIA1	WKCSLKDGVVTINR	259	1//12	8//44	1.428	0.9	K.DNTQSK[2082.15]LTVK.G	Toa2	1	TFIIA2	DNTQSKLTVK	59	126.128	663858	127.131	667426	1.39295e+06	724201	736494	1.01697	0.0242837	0.0242837
						0	8.2338	JL121323_121323_ABP_127_30B.10264.10264.3	N	4.1265	0.169734		1//14	11//57	2.51975	0.730769	R.WK[1539.9]C[160.03]SLKDGVVTINR.N	Toa1	1	TFIIA1	WKCSLKDGVVTINR	259	1//12	8//34	1.60675	1.16667	K.DNTQSK[2082.17]LTVK.G	Toa2	1	TFIIA2	DNTQSKLTVK	59	126.127	255714	127.131	234830	916824	279228	259131	0.928024	-0.107767	-0.107767
						0	1.9973	JL121323_121323_ABP_127_30B.08406.08406.5	NP	3.7335	0.154064	0.0301	//12	10//60	2.5425	1.25	K.DNTQSK[1227.69]LTVK.G	Toa2	1	TFIIA2	DNTQSKLTVK	59	//6	4//32	1.191	1	R.WK[1539.87]C[160.03]SLK.D	Toa1	1	TFIIA1	WKCSLK	259	126.128	92859.8	127.131	92984	105886	101305	102606	1.01284	0.0184127	0.0184127
						0	2.20238	JL121323_121323_ABP_127_1ug.08828.08828.5	P	2.10075	0.0809616	0.0968	//12	8//60	1.46625	0.85	K.DNTQSK[1227.69]LTVK.G	Toa2	1	TFIIA2	DNTQSKLTVK	59	//6	3//32	0.6345	0.666667	R.WK[1539.87]C[160.03]SLK.D	Toa1	1	TFIIA1	WKCSLK	259	126.128	79358.8	127.131	72085.4	270733	86665.9	79545	0.917836	-0.123692	-0.123692
	7	TFIIA1:255---TFIIA2:46	6.80625	-0.102668	0.102668
						-2	2.36254	JL121323_121323_ABP_127_100B.15631.15631.3	P	6.80625	0.242168	0.373	1//16	21//61	6.7105	1.96429	R.VLETFDK[881.55]VVAETLK.D	Toa2	1	TFIIA2	VLETFDKVVAETLK	46	//4	2//11	0.09575	0.25	R.TK[1998.15]AR.W	Toa1	1	TFIIA1	TKAR	255	126.128	210819	127.131	194279	1.49505e+06	230196	214384	0.931309	-0.102668	-0.102668
	8	TFIIA1:255---TFIIA2:119	2.40175	0.034858	-0.034858
						0	5.64898	JL121323_121323_ABP_127_30B.04758.04758.4	P	2.40175	0.169507	0.455	//10	8//36	1.92075	0.9375	R.IVAC[160.03]NSK[881.55]K.S	Toa2	1	TFIIA2	IVACNSKK	119	//4	4//17	0.481	0.75	R.TK[1325.76]AR.W	Toa1	1	TFIIA1	TKAR	255	126.127	31275.6	127.131	31672.4	31672.4	34115.7	34950	1.02446	0.034858	0.034858
5	TFIIA1---TFIIB
	1	TFIIA1:255---TFIIB:190	4.2505	3.11018	-3.11018
						0	1.44878	JL121323_121323_ABP_127_50B.11569.11569.5	P	4.2505	0.193724	0.008	//14	17//82	4.072	1.79167	R.TFK[881.55]EIQSLIHVK.T	Sua7	1	TFIIB	TFKEIQSLIHVK	190	1//4	3//20	0.1785	0.375	R.TK[1849.09]AR.W	Toa1	1	TFIIA1	TKAR	255	126.128	25722.3	127.131	202750	202750	25910.1	223731	8.6349	3.11018	3.11018
	2	TFIIA1:255---TFIIB:55	13.671	2.2995	-2.2995
						0	1.46044	JL121323_121323_ABP_127_70B.26486.26486.5	P	13.671	0.411876	0.251	1//15	38//188	13.671	2.41304	R.FSEGDVVC[160.03]ALC[160.03]GLVLSDK[881.55]LVDTR.S	Sua7	1	TFIIB	FSEGDVVCALCGLVLSDKLVDTR	55	//4	//19	0	0	R.TK[2959.52]AR.W	Toa1	1	TFIIA1	TKAR	255	126.128	41060.2	127.131	191672	493815	42964.2	211507	4.92287	2.2995	2.2995
Total inter crosslinks are: 61
