# Supplementary material for: Isobaric crosslinking mass spectrometry technology for studying conformational and structural changes in proteins and complexes
Source: eLife. 2024 Nov 14;13:RP99809. doi: 10.7554/eLife.99809 (PMC11563578; doi:10.7554/eLife.99809)
Supplement: Figure 3—source data 2. — The information includes the peptide sequences and protein names, sites of Qlinker modification, score, search engine (N = Nexus, P = pLink2), reporter ion intensities, and reporter ion ratios. [file elife-99809-fig3-data2.xlsx]

## Sheet: ABP-127-intra
index	Protein-protein	Crosslinkingsites	Xcorr	Ratio	126/127Ratio	Da	ppm	spectrum	engine	xcorr	Xcorr_norm	expect	immonium1	ion1	dot1	connective1	peptide1	protein1	Unique_protein1	subunit1	realpep1	position1	immonium2	ion2	dot2	connective2	peptide2	protein2	Unique_protein2	subunit2	realpep2	position2	Q2link0mz	Q2link0intensity	Q2link1mz	Q2link1intensity	MaxIntensity	corrected_126	Corrected_127	ratio127/126	log2ratio127/126	adjustedLog2127/126
1	TBP
	1	TBP:11---TBP:110	5.12625	0.0233109	-0.0233109
						0	1.01595	JL121323_121323_ABP_127_50B.10649.10649.5	N	5.12625	0.225058		//11	8//49	1.6885	1.3125	R.LKEFK[2038.21]EANK.I	Spt15	1	TBP	LKEFKEANK	11	//17	10//105	3.43775	0.928571	R.IREPK[1512.88]TTALIFASGK.M	Spt15	1	TBP	IREPKTTALIFASGK	110	126.127	518570	127.131	547209	554461	565392	603837	1.068	0.0949057	0.0949057
						0	7.49237	JL121323_121323_ABP_127_50B.10628.10628.5	N	4.96775	0.251882		//11	6//49	1.1325	0.8125	R.LKEFK[2038.22]EANK.I	Spt15	1	TBP	LKEFKEANK	11	//17	12//105	3.83525	1	R.IREPK[1512.9]TTALIFASGK.M	Spt15	1	TBP	IREPKTTALIFASGK	110	126.127	551739	127.131	588517	985890	601479	649419	1.0797	0.110636	0.110636
						2373	-65.3955	JL121323_121323_ABP_127_50B.20650.20650.3	P	3.67275	0.122189	0.576	1//15	7//76	0.318	0.175	R.EPK[2511.36]TTALIFASGK[425.27]M[147.04]VVTGAK.S	Spt15	1	TBP	EPKTTALIFASGKMVVTGAK	110	1//16	9//59	3.35475	0.733333	K.EFK[2768.57]EANK[425.27]IVFDPNTR.Q	Spt15	1	TBP	EFKEANKIVFDPNTR	11	126.127	1.15027e+06	127.131	1.03633e+06	1.23589e+06	1.25629e+06	1.14358e+06	0.910285	-0.135609	-0.135609
	2	TBP:11---TBP:133	5.15075	-0.396122	0.396122
						0	-0.791745	JL121323_121323_ABP_127_50B.13914.13914.6	P	5.15075	0.216591	0.083	//11	21//132	3.56825	1.47059	R.LK[425.27]EFK[1513.78]EANK[425.27]IVFDPNTR.Q	Spt15	1	TBP	LKEFKEANKIVFDPNTR	11	//12	7//54	1.5825	1	K.SEDDSK[3049.72]LASR.K	Spt15	1	TBP	SEDDSKLASR	133	126.128	927066	127.131	591435	1.12226e+06	1.01547e+06	652639	0.642694	-0.637796	-0.637796
						1	-6.54957	JL121323_121323_ABP_127_50B.14004.14004.6	P	5.10775	0.227689	0.107	//11	20//132	3.70775	1.23529	R.LK[425.27]EFK[1513.78]EANK[425.27]IVFDPNTR.Q	Spt15	1	TBP	LKEFKEANKIVFDPNTR	11	//12	6//54	1.4	0.8	K.SEDDSK[3049.72]LASR.K	Spt15	1	TBP	SEDDSKLASR	133	126.127	1.37755e+06	127.131	827521	1.85866e+06	1.50954e+06	913156	0.604923	-0.725177	-0.725177
						-1	2.05686	JL121323_121323_ABP_127_30B.12261.12261.6	P	4.857	0.21128	0.014	//11	18//132	3.375	1.26471	R.LK[425.27]EFK[1513.78]EANK[425.27]IVFDPNTR.Q	Spt15	1	TBP	LKEFKEANKIVFDPNTR	11	//12	7//54	1.482	1	K.SEDDSK[3049.72]LASR.K	Spt15	1	TBP	SEDDSKLASR	133	126.128	809429	127.131	528472	1.06376e+06	886471	583160	0.657844	-0.604183	-0.604183
						0	1.91544	JL121323_121323_ABP_127_50B.12342.12342.6	P	4.782	0.199126	0.0397	//14	12//131	3.1075	1.05882	R.LKEFK[1513.78]EANK[425.27]IVFDPNTR.Q	Spt15	1	TBP	LKEFKEANKIVFDPNTR	11	//12	6//54	1.6745	0.8	K.SEDDSK[2752.54]LASR.K	Spt15	1	TBP	SEDDSKLASR	133	126.127	695635	127.131	644490	695635	759533	711184	0.936344	-0.0948898	-0.0948898
						0	-0.466408	JL121323_121323_ABP_127_30B.06525.06525.4	P	3.975	0.176045	0.597	//12	10//45	3.161	1.4	K.SEDDSK[1512.87]LASR.K	Spt15	1	TBP	SEDDSKLASR	133	//11	6//41	0.814	0.555556	R.LKEFK[1513.78]EANK.I	Spt15	1	TBP	LKEFKEANK	11	126.126	38013.9	127.13	39744.9	120551	41450.7	43857.9	1.05807	0.0814379	0.0814379
	3	TBP:11---TBP:138	7.3695	-0.311358	0.311358
						0	4.20885	JL121323_121323_ABP_127_50B.12355.12355.6	P	7.3695	0.321918	0.683	//11	25//135	7.08525	1.91176	R.LK[425.27]EFK[943.57]EANK[425.27]IVFDPNTR.Q	Spt15	1	TBP	LKEFKEANKIVFDPNTR	11	//5	3//23	0.28425	0.625	R.K[3049.72]YAR.I	Spt15	1	TBP	KYAR	138	126.128	1.31176e+06	127.131	872352	1.86893e+06	1.43642e+06	962626	0.670156	-0.577431	-0.577431
						0	2.01085	JL121323_121323_ABP_127_30B.09665.09665.5	P	6.524	0.27955	0.00184	//16	25//120	6.40375	2.13333	K.EFK[943.57]EANK[425.27]IVFDPNTR.Q	Spt15	1	TBP	EFKEANKIVFDPNTR	11	1//5	3//23	0.12025	0.625	R.K[2511.36]YAR.I	Spt15	1	TBP	KYAR	138	126.128	1.01118e+06	127.131	588866	1.94085e+06	1.10829e+06	649804	0.586313	-0.770258	-0.770258
						0	-1.12497	JL121323_121323_ABP_127_50B.10954.10954.5	P	5.73475	0.266509	0.362	//16	24//120	5.667	2.1	K.EFK[943.57]EANK[425.27]IVFDPNTR.Q	Spt15	1	TBP	EFKEANKIVFDPNTR	11	//5	1//23	0.06775	0.125	R.K[2511.36]YAR.I	Spt15	1	TBP	KYAR	138	126.128	623230	127.131	473143	1.00755e+06	681745	522105	0.765837	-0.384891	-0.384891
						-1	-14.0489	JL121323_121323_ABP_127_30B.17230.17230.6	P	4.406	0.199986	0.72	//11	14//132	4.3475	0.970588	R.LK[425.27]EFK[1370.82]EANK[425.27]IVFDPNTR.Q	Spt15	1	TBP	LKEFKEANKIVFDPNTR	11	2//10	2//41	0.0585	0.125	K.LASRK[3049.72]YAR.I	Spt15	1	TBP	LASRKYAR	138	126.128	473584	127.131	367953	1.07503e+06	517947	406030	0.783923	-0.351217	-0.351217
						0	2.42896	JL121323_121323_ABP_127_50B.11123.11123.5	P	3.96325	0.184814	0.0224	//16	20//120	3.41175	1.63333	K.EFK[943.57]EANK[425.27]IVFDPNTR.Q	Spt15	1	TBP	EFKEANKIVFDPNTR	11	//5	3//23	0.5515	1	R.K[2511.36]YAR.I	Spt15	1	TBP	KYAR	138	126.127	500936	127.131	456286	500936	547045	503504	0.920407	-0.119657	-0.119657
						0	3.71266	JL121323_121323_ABP_127_50B.21229.21229.4	P	3.812	0.126267	0.589	//16	12//96	3.78575	1.13333	K.E[111.03]FK[943.57]EANK[425.27]IVFDPNTR.Q	Spt15	1	TBP	EFKEANKIVFDPNTR	11	//5	1//18	0.02625	0.125	R.K[2493.35]YAR.I	Spt15	1	TBP	KYAR	138	126.128	498740	127.131	455809	518927	544628	502978	0.923525	-0.114777	-0.114777
						0	0.263827	JL121323_121323_ABP_127_30B.12643.12643.4	P	2.88825	0.0932732	0.729	//18	15//93	2.79475	1	K.E[111.03]FK[1370.82]EANKIVFDPNTR.Q	Spt15	1	TBP	EFKEANKIVFDPNTR	11	1//10	5//33	0.0935	0.3125	K.LASRK[2196.18]YAR.I	Spt15	1	TBP	LASRKYAR	138	126.128	1927074	127.131	1.28867e+06	1927074	2.11013e+06	1.42203e+06	0.673908	-0.569376	-0.569376
						-2	-50.6894	JL121323_121323_ABP_127_30B.04903.04903.4	P	1.4835	0.0732755	0.0584	//9	5//33	1.0615	0.928571	K.EFK[943.57]EANK.I	Spt15	1	TBP	EFKEANK	11	//5	2//21	0.422	0.5	R.K[1271.7]YAR.I	Spt15	1	TBP	KYAR	138	126.127	52616.4	127.131	49836.9	52616.4	57436.2	54994.2	0.957483	-0.0626814	-0.0626814
						-2	-49.5994	JL121323_121323_ABP_127_30B.04873.04873.4	P	1.23525	0.0683346	0.167	//9	6//33	0.87375	1	K.EFK[943.57]EANK.I	Spt15	1	TBP	EFKEANK	11	//5	2//21	0.3615	0.5	R.K[1271.7]YAR.I	Spt15	1	TBP	KYAR	138	126.127	45107.4	127.131	42500.5	45107.4	49242.1	46898.6	0.952407	-0.0703494	-0.0703494
						0	-1.03052	JL121323_121323_ABP_127_50B.32161.32161.5	P	1.20375	0.0391502	0.79	//18	7//115	1.0725	0.466667	K.E[111.03]FK[1853.14]EANKIVFDPNTR.Q	Spt15	1	TBP	EFKEANKIVFDPNTR	11	1//14	4//76	0.13125	0.166667	K.LASRK[2196.18]YARIIQK.I	Spt15	1	TBP	LASRKYARIIQK	138	126.128	60130.3	127.131	55784	95095.7	65652.7	61556.7	0.937611	-0.0929388	-0.0929388
	4	TBP:11---TBP:145	4.02225	-0.039559	0.039559
						-1	6.56704	JL121323_121323_ABP_127_50B.20403.20403.6	P	4.02225	0.144151	0.0232	//18	10//115	2.253	0.9	K.E[111.03]FK[2013.23]EANKIVFDPNTR.Q	Spt15	1	TBP	EFKEANKIVFDPNTR	11	//16	8//96	1.76925	0.535714	R.KYARIIQK[2196.18]IGFAAK.F	Spt15	1	TBP	KYARIIQKIGFAAK	145	126.127	162890	127.131	156751	482938	177781	172973	0.972952	-0.039559	-0.039559
	5	TBP:11---TBP:15	12.787	-0.295782	0.295782
						0	-5.65747	JL121323_121323_ABP_127_30B.12336.12336.5	P	12.787	0.539456	0.537	//18	21//129	6.94	1.76471	R.LKEFK[1809.98]EANKIVFDPNTR.Q	Spt15	1	TBP	LKEFKEANKIVFDPNTR	11	//14	15//74	5.847	1.875	K.EANK[2455.37]IVFDPNTR.Q	Spt15	1	TBP	EANKIVFDPNTR	15	126.128	837487	127.131	660635	1.27176e+06	915817	729000	0.796011	-0.329139	-0.329139
						0	-3.93932	JL121323_121323_ABP_127_30B.12266.12266.5	P	10.3588	0.39915	0.438	//18	19//129	5.27075	1.44118	R.LKEFK[1809.98]EANKIVFDPNTR.Q	Spt15	1	TBP	LKEFKEANKIVFDPNTR	11	//14	16//74	5.088	1.91667	K.EANK[2455.37]IVFDPNTR.Q	Spt15	1	TBP	EANKIVFDPNTR	15	126.128	914704	127.131	753016	1425298	999873	830941	0.831047	-0.266998	-0.266998
						0	13.4901	JL121323_121323_ABP_127_50B.15022.15022.5	N	8.208	0.261822		//14	20//74	6.95225	2.63636	K.EANK[1810.09]IVFDPNTR.Q	Spt15	1	TBP	EANKIVFDPNTR	15	//11	8//57	1.25575	0.9375	R.LK[425.27]EFK[1810.02]EANK.I	Spt15	1	TBP	LKEFKEANK	11	126.128	4.0915e+06	127.131	2996496	10523079	4.47699e+06	3.30658e+06	0.738574	-0.437186	-0.437186
						0	13.0944	JL121323_121323_ABP_127_70B.13878.13878.5	N	7.807	0.261353		//14	19//74	6.56875	2.31818	K.EANK[1810.09]IVFDPNTR.Q	Spt15	1	TBP	EANKIVFDPNTR	15	//11	7//57	1.23825	0.875	R.LK[425.27]EFK[1810.02]EANK.I	Spt15	1	TBP	LKEFKEANK	11	126.127	1.53249e+06	127.131	1141549	4.5976e+06	1.67664e+06	1.25968e+06	0.751312	-0.412515	-0.412515
						0	12.3029	JL121323_121323_ABP_127_30B.13175.13175.5	N	7.72475	0.234229		//14	17//74	6.476	2.09091	K.EANK[1810.09]IVFDPNTR.Q	Spt15	1	TBP	EANKIVFDPNTR	15	//11	7//57	1.24875	0.875	R.LK[425.27]EFK[1810.02]EANK.I	Spt15	1	TBP	LKEFKEANK	11	126.128	5.59998e+06	127.131	4.00385e+06	14463357	6.12877e+06	4.41818e+06	0.720892	-0.472145	-0.472145
						0	14.8751	JL121323_121323_ABP_127_D.15065.15065.5	N	7.64175	0.277932		//14	19//74	6.49875	2.31818	K.EANK[1810.1]IVFDPNTR.Q	Spt15	1	TBP	EANKIVFDPNTR	15	//11	7//57	1.143	0.875	R.LK[425.27]EFK[1810.03]EANK.I	Spt15	1	TBP	LKEFKEANK	11	126.127	355252	127.131	289436	1.21722e+06	388366	319388	0.82239	-0.282106	-0.282106
						-3	7.37777	JL121323_121323_ABP_127_30B.23471.23471.5	N	7.567	0.227555		//13	11//65	3.699	1.4	K.E[111.03]ANK[2196.2]IVFDPNTR.Q	Spt15	1	TBP	EANKIVFDPNTR	15	//14	13//101	3.868	1.15385	K.E[111.03]FK[1792]EANKIVFDPNTR.Q	Spt15	1	TBP	EFKEANKIVFDPNTR	11	126.128	568602	127.132	426187	788997	622054	470290	0.756027	-0.40349	-0.40349
						0	4.38287	JL121323_121323_ABP_127_30B.18445.18445.5	NP	6.914	0.234182	0.709	//16	14//121	3.4825	1	K.E[111.03]FK[1791.97]EANK[425.27]IVFDPNTR.Q	Spt15	1	TBP	EFKEANKIVFDPNTR	11	1//15	11//79	3.4315	0.958333	K.E[111.03]ANK[2493.35]IVFDPNTR.Q	Spt15	1	TBP	EANKIVFDPNTR	15	126.128	918558	127.131	770970	1414458	1.00391e+06	850753	0.847443	-0.238812	-0.238812
						0	0.395204	JL121323_121323_ABP_127_50B.19992.19992.5	NP	6.701	0.240693	0.783	//16	15//121	3.5735	1.03333	K.E[111.03]FK[1791.97]EANK[425.27]IVFDPNTR.Q	Spt15	1	TBP	EFKEANKIVFDPNTR	11	1//15	9//79	3.1275	0.875	K.E[111.03]ANK[2493.35]IVFDPNTR.Q	Spt15	1	TBP	EANKIVFDPNTR	15	126.128	696816	127.131	592977	931024	761462	654341	0.859322	-0.21873	-0.21873
						0	14.2618	JL121323_121323_ABP_127_D.13482.13482.4	N	6.561	0.252123		1//11	7//40	2.38	1.0625	R.LKEFK[1810.02]EANK.I	Spt15	1	TBP	LKEFKEANK	11	//14	13//61	4.181	2	K.EANK[1512.91]IVFDPNTR.Q	Spt15	1	TBP	EANKIVFDPNTR	15	126.127	500632	127.13	324443	1.21174e+06	548313	358018	0.652944	-0.614969	-0.614969
						0	13.4736	JL121323_121323_ABP_127_70B.11976.11976.4	N	6.19475	0.233628		//11	8//40	3.09875	1.3125	R.LKEFK[1810.02]EANK.I	Spt15	1	TBP	LKEFKEANK	11	//14	16//61	3.096	1.90909	K.EANK[1512.91]IVFDPNTR.Q	Spt15	1	TBP	EANKIVFDPNTR	15	126.127	892853	127.131	671516	3.39259e+06	976760	741007	0.758638	-0.398517	-0.398517
						0	13.7363	JL121323_121323_ABP_127_30B.11618.11618.4	N	6.168	0.211722		//11	6//40	1.5685	1	R.LKEFK[1810.02]EANK.I	Spt15	1	TBP	LKEFKEANK	11	//14	16//61	4.5995	2.22727	K.EANK[1512.91]IVFDPNTR.Q	Spt15	1	TBP	EANKIVFDPNTR	15	126.127	4.44516e+06	127.131	2.93944e+06	15770709	4.8678e+06	3.24363e+06	0.666343	-0.585662	-0.585662
						0	14.437	JL121323_121323_ABP_127_30B.11177.11177.4	N	6.09675	0.203279		1//11	9//40	2.64225	1.375	R.LKEFK[1810.02]EANK.I	Spt15	1	TBP	LKEFKEANK	11	//14	14//61	3.4545	2.04545	K.EANK[1512.92]IVFDPNTR.Q	Spt15	1	TBP	EANKIVFDPNTR	15	126.127	2.71019e+06	127.131	2.02777e+06	4618507	2.96501e+06	2.23761e+06	0.754671	-0.406079	-0.406079
						-2	14.6639	JL121323_121323_ABP_127_30B.40576.40576.3	N	6.0735	0.179604		//14	7//44	2.959	0.909091	K.EANK[2196.23]IVFDPNTR.Q	Spt15	1	TBP	EANKIVFDPNTR	15	1//14	9//57	3.1145	0.846154	K.E[111.03]FK[1810.03]EANKIVFDPNTR.Q	Spt15	1	TBP	EFKEANKIVFDPNTR	11	126.127	156776	127.131	132367	163914	171334	146065	0.852517	-0.2302	-0.2302
						-2	2.05537	JL121323_121323_ABP_127_30B.17288.17288.5	NP	5.80925	0.205049	0.348	//16	11//121	2.98825	0.866667	K.E[111.03]FK[1791.97]EANK[425.27]IVFDPNTR.Q	Spt15	1	TBP	EFKEANKIVFDPNTR	11	1//15	10//79	2.821	1	K.E[111.03]ANK[2493.35]IVFDPNTR.Q	Spt15	1	TBP	EANKIVFDPNTR	15	126.128	837207	127.131	734252	1.26483e+06	914612	810235	0.885878	-0.17482	-0.17482
						-3	14.4678	JL121323_121323_ABP_127_30B.14552.14552.6	N	5.7965	0.174043		//14	9//79	2.703	0.884615	K.E[111.03]FK[2511.42]EANKIVFDPNTR.Q	Spt15	1	TBP	EFKEANKIVFDPNTR	11	1//16	13//88	3.0935	1.03571	K.EFK[425.27]EANK[2196.24]IVFDPNTR.Q	Spt15	1	TBP	EFKEANKIVFDPNTR	15	126.128	3.492e+06	127.131	3.22825e+06	13465147	3.81284e+06	3.56232e+06	0.934294	-0.0980511	-0.0980511
						0	15.0501	JL121323_121323_ABP_127_50B.12747.12747.4	N	5.6465	0.184372		1//11	9//40	2.97375	1.375	R.LKEFK[1810.02]EANK.I	Spt15	1	TBP	LKEFKEANK	11	//14	11//61	2.67275	1.31818	K.EANK[1512.92]IVFDPNTR.Q	Spt15	1	TBP	EANKIVFDPNTR	15	126.128	2.38986e+06	127.131	1820980	3.34027e+06	2.61416e+06	2.00942e+06	0.768668	-0.379567	-0.379567
						-1	5.70124	JL121323_121323_ABP_127_30B.17888.17888.5	NP	5.5035	0.167864	0.235	//16	13//121	2.80325	0.933333	K.E[111.03]FK[1791.97]EANK[425.27]IVFDPNTR.Q	Spt15	1	TBP	EFKEANKIVFDPNTR	11	1//15	10//79	2.70025	0.875	K.E[111.03]ANK[2493.35]IVFDPNTR.Q	Spt15	1	TBP	EANKIVFDPNTR	15	126.128	863296	127.131	670552	1.53475e+06	944167	739943	0.783699	-0.351628	-0.351628
						0	11.6344	JL121323_121323_ABP_127_100B.12602.12602.4	N	5.49875	0.185471		1//11	10//40	3.13525	1.625	R.LKEFK[1810.01]EANK.I	Spt15	1	TBP	LKEFKEANK	11	//14	12//61	2.3635	1.36364	K.EANK[1512.91]IVFDPNTR.Q	Spt15	1	TBP	EANKIVFDPNTR	15	126.127	380939	127.131	242114	972328	417278	267168	0.640265	-0.643258	-0.643258
						0	15.7507	JL121323_121323_ABP_127_1ug.12490.12490.4	N	5.49075	0.20465		//11	8//40	2.77225	1.3125	R.LKEFK[1810.03]EANK.I	Spt15	1	TBP	LKEFKEANK	11	//14	13//61	2.7185	1.68182	K.EANK[1512.92]IVFDPNTR.Q	Spt15	1	TBP	EANKIVFDPNTR	15	126.128	410200	127.131	323845	1362252	448563	357358	0.796673	-0.32794	-0.32794
						-3	13.9415	JL121323_121323_ABP_127_50B.16690.16690.6	N	5.1175	0.162432		//14	7//79	2.45225	0.692308	K.E[111.03]FK[2511.42]EANKIVFDPNTR.Q	Spt15	1	TBP	EFKEANKIVFDPNTR	11	//16	11//88	2.66525	0.857143	K.EFK[425.27]EANK[2196.24]IVFDPNTR.Q	Spt15	1	TBP	EFKEANKIVFDPNTR	15	126.128	792146	127.131	660026	1.24802e+06	865808	728327	0.841211	-0.24946	-0.24946
						0	13.8239	JL121323_121323_ABP_127_70B.11745.11745.4	N	5.06125	0.156705		1//11	7//40	2.50325	1.0625	R.LKEFK[1810.02]EANK.I	Spt15	1	TBP	LKEFKEANK	11	//14	12//61	2.558	1.36364	K.EANK[1512.91]IVFDPNTR.Q	Spt15	1	TBP	EANKIVFDPNTR	15	126.127	757652	127.13	514488	1.34898e+06	829525	567729	0.684402	-0.547084	-0.547084
						-3	16.1164	JL121323_121323_ABP_127_30B.14645.14645.7	N	4.89725	0.170064		//14	8//79	2.41825	0.961538	K.E[111.03]FK[2511.43]EANKIVFDPNTR.Q	Spt15	1	TBP	EFKEANKIVFDPNTR	11	//16	9//88	2.479	0.928571	K.EFK[425.27]EANK[2196.24]IVFDPNTR.Q	Spt15	1	TBP	EFKEANKIVFDPNTR	15	126.127	506201	127.131	482925	1.18677e+06	552529	532900	0.964474	-0.0521859	-0.0521859
						0	-1.46768	JL121323_121323_ABP_127_30B.17550.17550.5	P	4.4575	0.168896	0.57	//14	9//74	3.95675	1.08333	K.EANK[2107.23]IVFDPNTR.Q	Spt15	1	TBP	EANKIVFDPNTR	15	1//11	6//58	0.50075	0.555556	R.LK[425.27]EFK[1809.98]EANK[425.27].I	Spt15	1	TBP	LKEFKEANK	11	126.128	1.08637e+06	127.131	843258	1.80818e+06	1.18814e+06	930521	0.783171	-0.3526	-0.3526
						0	10.507	JL121323_121323_ABP_127_50B.45587.45587.5	P	4.41275	0.228664	0.758	//14	11//74	4.06575	1.29167	K.EANK[1810.05]IVFDPNTR.Q	Spt15	1	TBP	EANKIVFDPNTR	15	//11	2//57	0.347	0.222222	R.LK[425.27]EFK[1809.98]EANK.I	Spt15	1	TBP	LKEFKEANK	11	126.127	35048.1	127.131	31159.1	63693.4	38283.4	34383.6	0.898131	-0.155002	-0.155002
						-1	14.9788	JL121323_121323_ABP_127_50B.44974.44974.5	P	4.28475	0.200264	0.661	//14	11//74	3.91325	1.29167	K.EANK[1810.05]IVFDPNTR.Q	Spt15	1	TBP	EANKIVFDPNTR	15	//11	2//57	0.3715	0.222222	R.LK[425.27]EFK[1809.98]EANK.I	Spt15	1	TBP	LKEFKEANK	11	126.127	39955.3	127.131	35632.1	80022.2	43642.3	39319.4	0.900948	-0.150485	-0.150485
						-1	20.0896	JL121323_121323_ABP_127_50B.45544.45544.4	N	4.098	0.181742		//14	7//59	1.992	0.909091	K.EANK[2214.12]IVFDPNTR.Q	Spt15	1	TBP	EANKIVFDPNTR	15	//17	8//84	2.106	0.75	K.EFK[1809.91]EANKIVFDPNTR.Q	Spt15	1	TBP	EFKEANKIVFDPNTR	11	126.127	36737.9	127.131	31477.4	36737.9	40143.7	34734.8	0.865263	-0.20879	-0.20879
						-2	1.84052	JL121323_121323_ABP_127_50B.23126.23126.5	P	3.833	0.153797	0.302	//14	13//74	3.035	1.54167	K.EANK[1810.05]IVFDPNTR.Q	Spt15	1	TBP	EANKIVFDPNTR	15	//11	9//57	0.798	0.888889	R.LK[425.27]EFK[1809.98]EANK.I	Spt15	1	TBP	LKEFKEANK	11	126.127	278637	127.131	279294	434628	303974	308196	1.01389	0.0198994	0.0198994
						-3	3.1575	JL121323_121323_ABP_127_30B.15140.15140.5	N	3.56	0.150662		//14	8//101	1.84825	0.692308	K.E[111.03]FK[2493.34]EANKIVFDPNTR.Q	Spt15	1	TBP	EFKEANKIVFDPNTR	11	//13	7//108	1.71175	0.653846	K.E[111.03]FK[2196.16]EANK[425.27]IVFDPNTR.Q	Spt15	1	TBP	EFKEANKIVFDPNTR	15	126.127	976589	127.13	835840	2.33152e+06	1.06713e+06	922336	0.864312	-0.210375	-0.210375
						2	2.15711	JL121323_121323_ABP_127_50B.23234.23234.5	P	3.42375	0.13546	0.153	//14	11//74	2.57575	1.25	K.EANK[1810.05]IVFDPNTR.Q	Spt15	1	TBP	EANKIVFDPNTR	15	//11	11//57	0.848	1	R.LK[425.27]EFK[1809.98]EANK.I	Spt15	1	TBP	LKEFKEANK	11	126.128	232685	127.131	221520	459120	253987	244443	0.962426	-0.0552526	-0.0552526
						1	-4.45161	JL121323_121323_ABP_127_50B.23247.23247.5	P	3.224	0.133748	0.204	//14	9//74	2.671	1.08333	K.EANK[1810.05]IVFDPNTR.Q	Spt15	1	TBP	EANKIVFDPNTR	15	//11	4//57	0.553	0.333333	R.LK[425.27]EFK[1809.98]EANK.I	Spt15	1	TBP	LKEFKEANK	11	126.128	222042	127.131	215441	368694	242320	237736	0.981084	-0.027551	-0.027551
						0	-7.37571	JL121323_121323_ABP_127_30B.20840.20840.4	P	1.80475	0.0503832	0.749	//14	8//59	1.7705	0.875	K.EANK[1810.05]IVFDPNTR.Q	Spt15	1	TBP	EANKIVFDPNTR	15	//11	2//45	0.03425	0.111111	R.LK[425.27]EFK[1809.98]EANK.I	Spt15	1	TBP	LKEFKEANK	11	126.128	811332	127.131	697294	811332	886519	769453	0.867948	-0.204319	-0.204319
	6	TBP:11---TBP:156	4.92825	-0.0444921	0.0444921
						-2	5.5695	JL121323_121323_ABP_127_50B.25977.25977.5	N	4.92825	0.15376		//17	8//108	1.99075	0.75	K.EFK[2277.17]EANKIVFDPNTR.Q	Spt15	1	TBP	EFKEANKIVFDPNTR	11	//18	11//116	2.9375	1.06667	K.FTDFK[2214.17]IQNIVGSC[160.03]DVK.F	Spt15	1	TBP	FTDFKIQNIVGSCDVK	156	126.127	364843	127.131	349908	364843	398211	386118	0.969631	-0.0444921	-0.0444921
	7	TBP:11---TBP:199	1.8615	0.0938307	-0.0938307
						0	5.11229	JL121323_121323_ABP_127_30B.32462.32462.4	P	1.8615	0.0472684	0.701	//18	11//96	1.551	0.666667	K.E[111.03]FK[1024.62]EANKIVFDPNTR.Q	Spt15	1	TBP	EFKEANKIVFDPNTR	11	2//8	4//22	0.3105	0.7	R.M[147.04]VK[2196.18]PK.I	Spt15	1	TBP	MVKPK	199	126.127	57168.1	127.131	60280.9	202420	62330.3	66518.9	1.0672	0.0938307	0.0938307
	8	TBP:11---TBP:239	3.44975	0.171835	-0.171835
						0	3.6216	JL121323_121323_ABP_127_30B.37084.37084.4	P	3.44975	0.0969099	0.8	//16	9//117	2.93725	0.575	R.EEIYQAFEAIYPVLSEFRK[2511.36]M.-	Spt15	1	TBP	EEIYQAFEAIYPVLSEFRKM	239	1//16	6//87	0.5125	0.266667	K.EFK[2869.48]EANK[425.27]IVFDPNTR.Q	Spt15	1	TBP	EFKEANKIVFDPNTR	11	126.127	19692.5	127.13	21904.2	258331	21456.9	24171	1.12649	0.171835	0.171835
	9	TBP:11---TBP:35	16.1842	-0.498252	0.498252
						0	1.70709	JL121323_121323_ABP_127_30B.07602.07602.4	NP	16.1842	0.503531	1.93e-06	//19	36//100	14.525	3.35294	R.DGTK[1512.87]PATTFQSEEDIKR.A	Spt15	1	TBP	DGTKPATTFQSEEDIKR	35	1//11	7//40	1.65925	0.944444	R.LKEFK[2329.2]EANK.I	Spt15	1	TBP	LKEFKEANK	11	126.127	664324	127.131	445846	8179447	727408	491984	0.676352	-0.564154	-0.564154
						0	2.82054	JL121323_121323_ABP_127_30B.07506.07506.4	NP	15.3775	0.46677	5.44e-06	1//19	38//102	13.9608	3.55882	R.DGTK[1271.7]PATTFQSEEDIKR.A	Spt15	1	TBP	DGTKPATTFQSEEDIKR	35	1//9	8//28	1.41675	1.5	K.EFK[2329.2]EANK.I	Spt15	1	TBP	EFKEANK	11	126.128	176823	127.131	119764	1.87112e+06	193601	132157	0.682626	-0.550832	-0.550832
						0	-0.343244	JL121323_121323_ABP_127_30B.11845.11845.6	NP	14.9183	0.523677	9.94e-08	//19	29//126	10.8168	2.55882	R.DGTK[2511.36]PATTFQSEEDIKR.A	Spt15	1	TBP	DGTKPATTFQSEEDIKR	35	//16	17//115	4.1015	1.46667	K.EFK[2329.2]EANK[425.27]IVFDPNTR.Q	Spt15	1	TBP	EFKEANKIVFDPNTR	11	126.127	1129157	127.131	726717	2.75108e+06	1.23676e+06	801920	0.648404	-0.625034	-0.625034
						0	1.15243	JL121323_121323_ABP_127_30B.07527.07527.3	NP	13.8117	0.532902	2.08e-05	//19	30//73	10.6122	2.58824	R.DGTK[1271.7]PATTFQSEEDIKR.A	Spt15	1	TBP	DGTKPATTFQSEEDIKR	35	//9	10//21	3.1995	2.07143	K.EFK[2329.2]EANK.I	Spt15	1	TBP	EFKEANK	11	126.127	161938	127.131	97910.1	2.10912e+06	177447	108042	0.608871	-0.715792	-0.715792
						0	2.94562	JL121323_121323_ABP_127_30B.08542.08542.5	NP	13.6967	0.442266	7.24e-05	//19	37//126	12.4448	3.11765	R.DGTK[1810.05]PATTFQSEEDIKR.A	Spt15	1	TBP	DGTKPATTFQSEEDIKR	35	1//11	9//57	1.252	0.944444	R.LK[425.27]EFK[2329.2]EANK.I	Spt15	1	TBP	LKEFKEANK	11	126.127	1.71383e+06	127.131	927106	13219249	1.87928e+06	1.02305e+06	0.544381	-0.877311	-0.877311
						0	2.51522	JL121323_121323_ABP_127_30B.07601.07601.5	NP	13.6668	0.45357	1.62e-05	//19	33//129	12.164	2.94118	R.DGTK[1512.87]PATTFQSEEDIKR.A	Spt15	1	TBP	DGTKPATTFQSEEDIKR	35	//11	7//49	1.50275	0.944444	R.LKEFK[2329.2]EANK.I	Spt15	1	TBP	LKEFKEANK	11	126.127	1.01818e+06	127.13	692651	5517553	1.11476e+06	764329	0.685647	-0.544462	-0.544462
						-1	7.59623	JL121323_121323_ABP_127_30B.11371.11371.5	P	12.7722	0.454569	0.00198	//14	11//131	1.8175	0.705882	R.LKEFK[2329.2]EANK[425.27]IVFDPNTR.Q	Spt15	1	TBP	LKEFKEANKIVFDPNTR	11	//19	29//126	10.9548	2.41176	R.DGTK[2752.54]PATTFQSEEDIKR.A	Spt15	1	TBP	DGTKPATTFQSEEDIKR	35	126.127	505271	127.131	365478	3.22277e+06	552931	403299	0.729385	-0.455248	-0.455248
						-1	-1.16243	JL121323_121323_ABP_127_30B.11831.11831.5	NP	12.4552	0.426901	0.00304	//19	28//126	10.901	2.64706	R.DGTK[2511.36]PATTFQSEEDIKR.A	Spt15	1	TBP	DGTKPATTFQSEEDIKR	35	//16	10//115	1.55425	0.633333	K.EFK[2329.2]EANK[425.27]IVFDPNTR.Q	Spt15	1	TBP	EFKEANKIVFDPNTR	11	126.127	1.00926e+06	127.131	650508	2451518	1.10543e+06	717825	0.649364	-0.622901	-0.622901
						0	2.41419	JL121323_121323_ABP_127_100B.12623.12623.5	P	12.3825	0.425823	1.82e-08	//14	9//131	1.72625	0.588235	R.LKEFK[2329.2]EANK[425.27]IVFDPNTR.Q	Spt15	1	TBP	LKEFKEANKIVFDPNTR	11	//19	29//126	10.6562	2.5	R.DGTK[2752.54]PATTFQSEEDIKR.A	Spt15	1	TBP	DGTKPATTFQSEEDIKR	35	126.128	171043	127.131	107593	1.4346e+06	187373	118728	0.633644	-0.658255	-0.658255
						0	1.46232	JL121323_121323_ABP_127_30B.07526.07526.5	NP	12.2297	0.436785	2.7e-05	//19	33//131	11.0938	2.85294	R.DGTK[1271.7]PATTFQSEEDIKR.A	Spt15	1	TBP	DGTKPATTFQSEEDIKR	35	1//9	7//35	1.136	1.14286	K.EFK[2329.2]EANK.I	Spt15	1	TBP	EFKEANK	11	126.127	375484	127.131	251377	2.00323e+06	411147	277390	0.674673	-0.56774	-0.56774
						0	1.13088	JL121323_121323_ABP_127_1ug.07930.07930.5	P	11.79	0.386241	0.000669	//19	31//129	10.941	2.79412	R.DGTK[1512.87]PATTFQSEEDIKR.A	Spt15	1	TBP	DGTKPATTFQSEEDIKR	35	1//11	8//49	0.849	0.888889	R.LKEFK[2329.2]EANK.I	Spt15	1	TBP	LKEFKEANK	11	126.128	68109.5	127.131	58792	190993	74418.2	64876	0.871776	-0.19797	-0.19797
						0	1.84031	JL121323_121323_ABP_127_30B.07604.07604.3	NP	11.4307	0.398896	8.91e-05	1//19	21//71	8.13275	1.52941	R.DGTK[1512.87]PATTFQSEEDIKR.A	Spt15	1	TBP	DGTKPATTFQSEEDIKR	35	//11	11//31	3.298	1.55556	R.LKEFK[2329.2]EANK.I	Spt15	1	TBP	LKEFKEANK	11	126.128	237662	127.131	138675	3129452	260483	153025	0.587467	-0.76742	-0.76742
						-1	7.79761	JL121323_121323_ABP_127_50B.12777.12777.5	P	11.361	0.415659	0.038	//14	13//131	1.376	0.735294	R.LKEFK[2329.2]EANK[425.27]IVFDPNTR.Q	Spt15	1	TBP	LKEFKEANKIVFDPNTR	11	//19	28//126	9.985	2.47059	R.DGTK[2752.54]PATTFQSEEDIKR.A	Spt15	1	TBP	DGTKPATTFQSEEDIKR	35	126.128	387065	127.131	299559	1.63666e+06	423337	330558	0.780839	-0.356902	-0.356902
						0	3.76756	JL121323_121323_ABP_127_30B.07541.07541.6	NP	11.2012	0.474207	4.16e-07	//19	24//131	9.91275	2.11765	R.DGTK[1271.7]PATTFQSEEDIKR.A	Spt15	1	TBP	DGTKPATTFQSEEDIKR	35	//9	7//35	1.2885	1.21429	K.EFK[2329.2]EANK.I	Spt15	1	TBP	EFKEANK	11	126.128	71922	127.131	69055.6	104531	78499	76201.7	0.970736	-0.0428495	-0.0428495
						0	4.0354	JL121323_121323_ABP_127_30B.08284.08284.3	NP	11.1442	0.367264	0.00108	//18	19//66	7.75925	1.6875	R.DGTK[1512.87]PATTFQSEEDIK.R	Spt15	1	TBP	DGTKPATTFQSEEDIK	35	//11	12//31	3.385	1.77778	R.LKEFK[2173.1]EANK.I	Spt15	1	TBP	LKEFKEANK	11	126.128	90616	127.131	60125.3	692482	99229.2	66347.2	0.668626	-0.580729	-0.580729
						-1	1.55499	JL121323_121323_ABP_127_70B.11727.11727.5	P	11.0053	0.387284	0.0381	//14	10//131	1.0215	0.5	R.LKEFK[2329.2]EANK[425.27]IVFDPNTR.Q	Spt15	1	TBP	LKEFKEANKIVFDPNTR	11	//19	28//126	9.98375	2.38235	R.DGTK[2752.54]PATTFQSEEDIKR.A	Spt15	1	TBP	DGTKPATTFQSEEDIKR	35	126.127	207579	127.131	151984	1.26421e+06	227137	167712	0.738375	-0.437575	-0.437575
						0	0.746095	JL121323_121323_ABP_127_30B.08790.08790.5	NP	10.5855	0.374423	0.000377	//15	27//134	9.2165	2.08824	R.DGTK[1271.7]PATTFQSEEDIK[425.27]R.A	Spt15	1	TBP	DGTKPATTFQSEEDIKR	35	1//9	6//35	1.369	1.07143	K.EFK[2626.38]EANK.I	Spt15	1	TBP	EFKEANK	11	126.128	231135	127.131	177479	305760	252811	195845	0.774668	-0.36835	-0.36835
						2	-18.6111	JL121323_121323_ABP_127_30B.07575.07575.3	P	10.5732	0.470529	9.71e-07	//19	20//71	6.87675	1.61765	R.DGTK[1512.87]PATTFQSEEDIKR.A	Spt15	1	TBP	DGTKPATTFQSEEDIKR	35	//11	12//31	3.6965	1.77778	R.LKEFK[2329.2]EANK.I	Spt15	1	TBP	LKEFKEANK	11	126.127	69206.4	127.131	42534.7	1.23122e+06	75825.8	46936.4	0.619003	-0.691982	-0.691982
						-2	1.71025	JL121323_121323_ABP_127_50B.12853.12853.7	P	10.5247	0.352511	1.15e-06	//14	10//131	2.34275	0.764706	R.LKEFK[2329.2]EANK[425.27]IVFDPNTR.Q	Spt15	1	TBP	LKEFKEANKIVFDPNTR	11	//19	23//126	8.182	2	R.DGTK[2752.54]PATTFQSEEDIKR.A	Spt15	1	TBP	DGTKPATTFQSEEDIKR	35	126.128	577419	127.131	417245	1.02059e+06	631889	460423	0.728646	-0.456711	-0.456711
						0	3.05513	JL121323_121323_ABP_127_1ug.07861.07861.5	NP	10.4335	0.342357	0.000608	//19	30//131	9.00575	2.26471	R.DGTK[1271.7]PATTFQSEEDIKR.A	Spt15	1	TBP	DGTKPATTFQSEEDIKR	35	1//9	6//35	1.42775	1.07143	K.EFK[2329.2]EANK.I	Spt15	1	TBP	EFKEANK	11	126.128	73304.5	127.131	64071.8	183593	80084.7	70702.2	0.882843	-0.179772	-0.179772
						0	2.84394	JL121323_121323_ABP_127_30B.13352.13352.6	NP	10.2592	0.310882	2.23e-05	//15	25//129	7.72125	2.11765	R.DGTK[2511.36]PATTFQSEEDIK[425.27]R.A	Spt15	1	TBP	DGTKPATTFQSEEDIKR	35	//16	13//115	2.538	1.16667	K.EFK[2626.38]EANK[425.27]IVFDPNTR.Q	Spt15	1	TBP	EFKEANKIVFDPNTR	11	126.127	1.51379e+06	127.131	982652	3.99634e+06	1.65795e+06	1.08434e+06	0.654026	-0.61258	-0.61258
						0	1.31546	JL121323_121323_ABP_127_1ug.07948.07948.5	P	10.186	0.323493	0.0645	1//19	29//129	9.5775	2.41176	R.DGTK[1512.87]PATTFQSEEDIKR.A	Spt15	1	TBP	DGTKPATTFQSEEDIKR	35	//11	5//49	0.6085	0.722222	R.LKEFK[2329.2]EANK.I	Spt15	1	TBP	LKEFKEANK	11	126.128	79471.4	127.131	68998.3	206777	86827.6	76138.5	0.876892	-0.189529	-0.189529
						0	0.669429	JL121323_121323_ABP_127_50B.07799.07799.5	NP	10.0727	0.378525	6.04e-05	//19	26//129	9.1175	2.23529	R.DGTK[1512.87]PATTFQSEEDIKR.A	Spt15	1	TBP	DGTKPATTFQSEEDIKR	35	1//11	7//49	0.95525	0.833333	R.LKEFK[2329.2]EANK.I	Spt15	1	TBP	LKEFKEANK	11	126.127	411758	127.131	451434	484102	448730	498150	1.11013	0.150732	0.150732
						-1	3.77011	JL121323_121323_ABP_127_50B.12772.12772.5	P	10.0117	0.365532	0.464	//14	10//131	1.5245	0.5	R.LKEFK[2329.2]EANK[425.27]IVFDPNTR.Q	Spt15	1	TBP	LKEFKEANKIVFDPNTR	11	//19	25//126	8.48725	1.94118	R.DGTK[2752.54]PATTFQSEEDIKR.A	Spt15	1	TBP	DGTKPATTFQSEEDIKR	35	126.127	358543	127.131	288356	1.1188e+06	392010	318197	0.811704	-0.300974	-0.300974
						0	3.98784	JL121323_121323_ABP_127_50B.07819.07819.6	P	9.8215	0.433075	0.00879	//19	28//129	9.7315	2.38235	R.DGTK[1512.87]PATTFQSEEDIKR.A	Spt15	1	TBP	DGTKPATTFQSEEDIKR	35	//11	3//49	0.09	0.166667	R.LKEFK[2329.2]EANK.I	Spt15	1	TBP	LKEFKEANK	11	126.128	313629	127.131	357432	382506	341625	394420	1.15454	0.207321	0.207321
						0	-2.89511	JL121323_121323_ABP_127_70B.12215.12215.6	NP	9.7445	0.370591	5.59e-22	//19	21//126	6.907	1.58824	R.DGTK[2511.36]PATTFQSEEDIKR.A	Spt15	1	TBP	DGTKPATTFQSEEDIKR	35	//16	8//115	2.8375	0.7	K.EFK[2329.2]EANK[425.27]IVFDPNTR.Q	Spt15	1	TBP	EFKEANKIVFDPNTR	11	126.128	199117	127.131	169378	298269	217591	186906	0.858976	-0.21931	-0.21931
						0	3.46868	JL121323_121323_ABP_127_30B.08784.08784.5	NP	9.6235	0.333686	0.00017	//15	25//134	8.5335	2.08824	R.DGTK[1271.7]PATTFQSEEDIK[425.27]R.A	Spt15	1	TBP	DGTKPATTFQSEEDIKR	35	1//9	5//35	1.09	0.785714	K.EFK[2626.38]EANK.I	Spt15	1	TBP	EFKEANK	11	126.128	184008	127.131	130757	198499	201393	144288	0.71645	-0.481061	-0.481061
						0	2.21369	JL121323_121323_ABP_127_30B.08747.08747.6	NP	9.48375	0.347206	0.000144	//15	29//132	8.5755	2.32353	R.DGTK[1512.87]PATTFQSEEDIK[425.27]R.A	Spt15	1	TBP	DGTKPATTFQSEEDIKR	35	//11	6//49	0.90825	0.777778	R.LKEFK[2626.38]EANK.I	Spt15	1	TBP	LKEFKEANK	11	126.127	840920	127.13	488092	1.69633e+06	921701	538602	0.584356	-0.775079	-0.775079
						0	-1.74931	JL121323_121323_ABP_127_50B.09104.09104.6	P	9.34475	0.347253	9e-06	//19	26//126	8.94825	2.20588	R.DGTK[1810.05]PATTFQSEEDIKR.A	Spt15	1	TBP	DGTKPATTFQSEEDIKR	35	//11	5//57	0.3965	0.388889	R.LK[425.27]EFK[2329.2]EANK.I	Spt15	1	TBP	LKEFKEANK	11	126.128	259120	127.131	238080	314912	282946	262718	0.928507	-0.107016	-0.107016
						-2	3.20139	JL121323_121323_ABP_127_100B.13367.13367.7	P	8.99675	0.319447	3.67e-12	//11	12//132	2.26925	0.941176	R.LK[425.27]EFK[2329.2]EANK[425.27]IVFDPNTR.Q	Spt15	1	TBP	LKEFKEANKIVFDPNTR	11	//19	21//126	6.7275	1.82353	R.DGTK[3049.72]PATTFQSEEDIKR.A	Spt15	1	TBP	DGTKPATTFQSEEDIKR	35	126.128	351138	127.131	200495	660816	384910	221243	0.574792	-0.798888	-0.798888
						0	3.37802	JL121323_121323_ABP_127_50B.07711.07711.4	P	8.6445	0.401165	0.0498	//19	21//102	7.9055	1.79412	R.DGTK[1271.7]PATTFQSEEDIKR.A	Spt15	1	TBP	DGTKPATTFQSEEDIKR	35	//9	4//28	0.739	0.857143	K.EFK[2329.2]EANK.I	Spt15	1	TBP	EFKEANK	11	126.127	230140	127.13	250318	457068	250829	276222	1.10124	0.139126	0.139126
						0	1.50607	JL121323_121323_ABP_127_50B.09147.09147.5	P	8.373	0.29127	0.00019	1//19	29//126	7.88425	2.41176	R.DGTK[1810.05]PATTFQSEEDIKR.A	Spt15	1	TBP	DGTKPATTFQSEEDIKR	35	//11	4//57	0.48875	0.5	R.LK[425.27]EFK[2329.2]EANK.I	Spt15	1	TBP	LKEFKEANK	11	126.127	365473	127.131	349631	1.41266e+06	398909	385812	0.967167	-0.0481637	-0.0481637
						0	0.417016	JL121323_121323_ABP_127_70B.07079.07079.3	N	8.334	0.258483		//11	6//31	1.4495	0.8125	R.LKEFK[2329.2]EANK.I	Spt15	1	TBP	LKEFKEANK	11	1//19	18//71	6.8845	1.65625	R.DGTK[1512.88]PATTFQSEEDIKR.A	Spt15	1	TBP	DGTKPATTFQSEEDIKR	35	126.127	104112	127.131	81647.9	478599	113856	90097.1	0.791328	-0.337652	-0.337652
						0	0.601816	JL121323_121323_ABP_127_50B.13112.13112.5	P	8.27675	0.263084	0.0106	//14	10//131	1.6485	0.617647	R.LKEFK[2329.2]EANK[425.27]IVFDPNTR.Q	Spt15	1	TBP	LKEFKEANKIVFDPNTR	11	//19	23//126	6.62825	1.67647	R.DGTK[2752.54]PATTFQSEEDIKR.A	Spt15	1	TBP	DGTKPATTFQSEEDIKR	35	126.128	484691	127.131	397185	1.20869e+06	529844	438287	0.8272	-0.273692	-0.273692
						-2	3.2896	JL121323_121323_ABP_127_70B.13032.13032.7	P	8.19575	0.286364	1.74e-12	//11	14//132	2.4515	1.02941	R.LK[425.27]EFK[2329.2]EANK[425.27]IVFDPNTR.Q	Spt15	1	TBP	LKEFKEANKIVFDPNTR	11	//19	21//126	5.74425	1.82353	R.DGTK[3049.72]PATTFQSEEDIKR.A	Spt15	1	TBP	DGTKPATTFQSEEDIKR	35	126.128	601285	127.131	336469	1.03632e+06	659198	371288	0.563242	-0.828174	-0.828174
						-3	3.85666	JL121323_121323_ABP_127_30B.12602.12602.7	P	8.12475	0.293243	0.000829	//11	13//132	2.5305	1.11765	R.LK[425.27]EFK[2329.2]EANK[425.27]IVFDPNTR.Q	Spt15	1	TBP	LKEFKEANKIVFDPNTR	11	//19	20//126	5.59425	1.70588	R.DGTK[3049.72]PATTFQSEEDIKR.A	Spt15	1	TBP	DGTKPATTFQSEEDIKR	35	126.128	2.04967e+06	127.131	1.29072e+06	4132385	2.24534e+06	1.42429e+06	0.63433	-0.656694	-0.656694
						0	2.58667	JL121323_121323_ABP_127_50B.14249.14249.6	P	7.82675	0.278532	0.135	//11	12//132	1.86875	0.705882	R.LK[425.27]EFK[2329.2]EANK[425.27]IVFDPNTR.Q	Spt15	1	TBP	LKEFKEANKIVFDPNTR	11	//19	17//126	5.958	1.44118	R.DGTK[3049.72]PATTFQSEEDIKR.A	Spt15	1	TBP	DGTKPATTFQSEEDIKR	35	126.128	2.75769e+06	127.131	1.62785e+06	12501236	3.02228e+06	1.7963e+06	0.594354	-0.750606	-0.750606
						0	2.05741	JL121323_121323_ABP_127_30B.12541.12541.6	P	7.75325	0.257147	0.0123	//11	14//132	2.2375	1	R.LK[425.27]EFK[2329.2]EANK[425.27]IVFDPNTR.Q	Spt15	1	TBP	LKEFKEANKIVFDPNTR	11	//19	17//126	5.51575	1.44118	R.DGTK[3049.72]PATTFQSEEDIKR.A	Spt15	1	TBP	DGTKPATTFQSEEDIKR	35	126.127	2.34392e+06	127.13	1.48198e+06	11295718	2.56761e+06	1.63534e+06	0.636914	-0.65083	-0.65083
						-2	4.08348	JL121323_121323_ABP_127_50B.15048.15048.7	P	7.749	0.272823	1.47e-06	//11	12//132	2.91325	0.911765	R.LK[425.27]EFK[2329.2]EANK[425.27]IVFDPNTR.Q	Spt15	1	TBP	LKEFKEANKIVFDPNTR	11	//19	18//126	4.83575	1.47059	R.DGTK[3049.72]PATTFQSEEDIKR.A	Spt15	1	TBP	DGTKPATTFQSEEDIKR	35	126.127	726741	127.131	483680	1152600	795802	533733	0.670686	-0.576291	-0.576291
						0	-0.153143	JL121323_121323_ABP_127_50B.07803.07803.3	NP	7.73275	0.286149	0.0215	//19	17//71	5.92025	1.32353	R.DGTK[1512.87]PATTFQSEEDIKR.A	Spt15	1	TBP	DGTKPATTFQSEEDIKR	35	//11	7//31	1.8125	0.777778	R.LKEFK[2329.2]EANK.I	Spt15	1	TBP	LKEFKEANK	11	126.127	95724.7	127.131	77970.8	720638	104648	86039.5	0.822182	-0.28247	-0.28247
						-3	3.76845	JL121323_121323_ABP_127_70B.13344.13344.7	P	7.6075	0.266682	5.55e-14	//11	11//132	1.84475	0.823529	R.LK[425.27]EFK[2329.2]EANK[425.27]IVFDPNTR.Q	Spt15	1	TBP	LKEFKEANKIVFDPNTR	11	//19	22//126	5.76275	1.67647	R.DGTK[3049.72]PATTFQSEEDIKR.A	Spt15	1	TBP	DGTKPATTFQSEEDIKR	35	126.128	560166	127.131	345520	981451	613729	381276	0.621244	-0.686768	-0.686768
						-2	4.24967	JL121323_121323_ABP_127_100B.13693.13693.6	NP	7.53925	0.247501	6.97e-07	1//15	24//129	6.0455	1.64706	R.DGTK[2511.36]PATTFQSEEDIK[425.27]R.A	Spt15	1	TBP	DGTKPATTFQSEEDIKR	35	//16	9//115	1.49375	0.733333	K.EFK[2626.38]EANK[425.27]IVFDPNTR.Q	Spt15	1	TBP	EFKEANKIVFDPNTR	11	126.127	188084	127.131	123660	626787	205976	136457	0.662487	-0.594035	-0.594035
						-1	-0.0343996	JL121323_121323_ABP_127_100B.13258.13258.6	P	7.21775	0.212982	0.0358	//14	17//131	2.99975	1.17647	R.LKEFK[2626.38]EANK[425.27]IVFDPNTR.Q	Spt15	1	TBP	LKEFKEANKIVFDPNTR	11	//15	17//129	4.218	1.05882	R.DGTK[2752.54]PATTFQSEEDIK[425.27]R.A	Spt15	1	TBP	DGTKPATTFQSEEDIKR	35	126.128	363872	127.131	204473	1.08497e+06	398908	225633	0.565627	-0.822077	-0.822077
						0	3.8077	JL121323_121323_ABP_127_30B.09811.09811.6	P	6.938	0.197743	0.0105	//15	26//129	6.45075	1.76471	R.DGTK[1810.05]PATTFQSEEDIK[425.27]R.A	Spt15	1	TBP	DGTKPATTFQSEEDIKR	35	//11	7//57	0.48725	0.5	R.LK[425.27]EFK[2626.38]EANK.I	Spt15	1	TBP	LKEFKEANK	11	126.127	1.83549e+06	127.131	1.09213e+06	2394679	2.01149e+06	1.20515e+06	0.599134	-0.73905	-0.73905
						-1	7.80379	JL121323_121323_ABP_127_30B.13326.13326.6	NP	6.85	0.221597	0.000285	//15	20//129	4.747	1.38235	R.DGTK[2511.36]PATTFQSEEDIK[425.27]R.A	Spt15	1	TBP	DGTKPATTFQSEEDIKR	35	//16	13//115	2.103	0.933333	K.EFK[2626.38]EANK[425.27]IVFDPNTR.Q	Spt15	1	TBP	EFKEANKIVFDPNTR	11	126.127	1422727	127.131	906312	3.81262e+06	1.55842e+06	1.0001e+06	0.641741	-0.639938	-0.639938
						-1	2.54612	JL121323_121323_ABP_127_70B.13622.13622.7	P	6.6715	0.226737	2.75e-14	//11	13//132	3.46375	1.02941	R.LK[425.27]EFK[2329.2]EANK[425.27]IVFDPNTR.Q	Spt15	1	TBP	LKEFKEANKIVFDPNTR	11	//19	17//126	3.20775	1.26471	R.DGTK[3049.72]PATTFQSEEDIKR.A	Spt15	1	TBP	DGTKPATTFQSEEDIKR	35	126.128	346049	127.131	203885	568528	379254	224984	0.593227	-0.753344	-0.753344
						0	2.96283	JL121323_121323_ABP_127_50B.10825.10825.6	NP	6.6485	0.236068	0.01	//15	23//129	5.78775	1.67647	R.DGTK[1810.05]PATTFQSEEDIK[425.27]R.A	Spt15	1	TBP	DGTKPATTFQSEEDIKR	35	//11	5//57	0.86075	0.722222	R.LK[425.27]EFK[2626.38]EANK.I	Spt15	1	TBP	LKEFKEANK	11	126.128	668805	127.131	620497	840100	730228	684709	0.937664	-0.0928571	-0.0928571
						0	4.00787	JL121323_121323_ABP_127_70B.14067.14067.7	P	6.57425	0.22263	1.19e-12	//11	11//132	3.14425	0.823529	R.LK[425.27]EFK[2329.2]EANK[425.27]IVFDPNTR.Q	Spt15	1	TBP	LKEFKEANKIVFDPNTR	11	//19	15//126	3.43	1.02941	R.DGTK[3049.72]PATTFQSEEDIKR.A	Spt15	1	TBP	DGTKPATTFQSEEDIKR	35	126.128	169576	127.131	124609	263619	185548	137504	0.74107	-0.432318	-0.432318
						-1	-1.49562	JL121323_121323_ABP_127_50B.07706.07706.3	NP	6.54075	0.295955	0.074	//19	15//73	4.72325	1	R.DGTK[1271.7]PATTFQSEEDIKR.A	Spt15	1	TBP	DGTKPATTFQSEEDIKR	35	//9	6//21	1.8175	1.14286	K.EFK[2329.2]EANK.I	Spt15	1	TBP	EFKEANK	11	126.127	76249.6	127.131	79373.9	355291	83147.4	87587.8	1.0534	0.0750583	0.0750583
						-1	4.11903	JL121323_121323_ABP_127_30B.07689.07689.3	NP	6.1945	0.265944	0.00467	//19	14//73	4.1075	0.882353	R.DGTK[1271.7]PATTFQSEEDIKR.A	Spt15	1	TBP	DGTKPATTFQSEEDIKR	35	//9	7//21	2.087	1.42857	K.EFK[2329.2]EANK.I	Spt15	1	TBP	EFKEANK	11	126.127	88999.9	127.131	39610.7	532979	97695.9	43709.8	0.447406	-1.16034	-1.16034
						0	-1.26467	JL121323_121323_ABP_127_30B.08833.08833.4	NP	5.88	0.204167	0.377	//15	12//103	3.04725	0.705882	R.DGTK[1271.7]PATTFQSEEDIK[425.27]R.A	Spt15	1	TBP	DGTKPATTFQSEEDIKR	35	//9	9//28	2.83275	1.78571	K.EFK[2626.38]EANK.I	Spt15	1	TBP	EFKEANK	11	126.127	346830	127.131	222867	2178635	379886	245930	0.647379	-0.627317	-0.627317
						-1	9.18983	JL121323_121323_ABP_127_50B.10779.10779.6	P	5.8165	0.220614	0.069	//15	22//129	5.464	1.55882	R.DGTK[1810.05]PATTFQSEEDIK[425.27]R.A	Spt15	1	TBP	DGTKPATTFQSEEDIKR	35	//11	3//57	0.3525	0.444444	R.LK[425.27]EFK[2626.38]EANK.I	Spt15	1	TBP	LKEFKEANK	11	126.127	582614	127.131	566207	582614	635809	624801	0.982686	-0.0251979	-0.0251979
						-1	3.44356	JL121323_121323_ABP_127_50B.16036.16036.6	P	5.759	0.191475	0.289	//11	8//132	1.554	0.529412	R.LK[425.27]EFK[2329.2]EANK[425.27]IVFDPNTR.Q	Spt15	1	TBP	LKEFKEANKIVFDPNTR	11	//19	18//126	4.205	1.20588	R.DGTK[3049.72]PATTFQSEEDIKR.A	Spt15	1	TBP	DGTKPATTFQSEEDIKR	35	126.127	780259	127.13	539510	3.01304e+06	854159	595341	0.69699	-0.520789	-0.520789
						0	4.08932	JL121323_121323_ABP_127_30B.09942.09942.6	P	5.507	0.16001	0.126	1//15	27//129	5.03575	1.64706	R.DGTK[1810.05]PATTFQSEEDIK[425.27]R.A	Spt15	1	TBP	DGTKPATTFQSEEDIKR	35	//11	6//57	0.47125	0.444444	R.LK[425.27]EFK[2626.38]EANK.I	Spt15	1	TBP	LKEFKEANK	11	126.127	777546	127.131	515978	1.1645e+06	851452	569374	0.668709	-0.58055	-0.58055
						0	2.20863	JL121323_121323_ABP_127_70B.17636.17636.6	P	5.23325	0.166879	0.0165	//15	13//134	3.109	0.823529	R.LK[425.27]EFK[2626.38]EANKIVFDPNTR.Q	Spt15	1	TBP	LKEFKEANKIVFDPNTR	11	//15	13//129	2.12425	0.941176	R.DGTK[2752.54]PATTFQSEEDIK[425.27]R.A	Spt15	1	TBP	DGTKPATTFQSEEDIKR	35	126.128	239072	127.131	190394	389404	261410	210096	0.803704	-0.315263	-0.315263
						0	5.02807	JL121323_121323_ABP_127_30B.09888.09888.6	P	5.213	0.161764	0.199	//15	23//129	4.71775	1.55882	R.DGTK[1810.05]PATTFQSEEDIK[425.27]R.A	Spt15	1	TBP	DGTKPATTFQSEEDIKR	35	//11	7//57	0.49525	0.5	R.LK[425.27]EFK[2626.38]EANK.I	Spt15	1	TBP	LKEFKEANK	11	126.127	1.26883e+06	127.131	745676	2.62283e+06	1.3906e+06	822841	0.591716	-0.757023	-0.757023
						-1	1.55336	JL121323_121323_ABP_127_30B.12840.12840.6	P	5.00475	0.153268	0.209	//11	11//132	1.6905	0.647059	R.LK[425.27]EFK[2329.2]EANK[425.27]IVFDPNTR.Q	Spt15	1	TBP	LKEFKEANKIVFDPNTR	11	//19	16//126	3.31425	1.14706	R.DGTK[3049.72]PATTFQSEEDIKR.A	Spt15	1	TBP	DGTKPATTFQSEEDIKR	35	126.128	1.23386e+06	127.131	931680	3.39235e+06	1.34977e+06	1.02809e+06	0.76168	-0.392743	-0.392743
						2421	-56.3791	JL121323_121323_ABP_127_100B.13840.13840.3	P	4.90275	0.141811	0.000438	//11	13//64	3.05475	0.882353	R.LK[425.27]EFK[2329.2]EANK[425.27]IVFDPNTR.Q	Spt15	1	TBP	LKEFKEANKIVFDPNTR	11	//19	10//68	1.848	0.794118	R.DGTK[3049.72]PATTFQSEEDIKR.A	Spt15	1	TBP	DGTKPATTFQSEEDIKR	35	126.127	292665	127.131	205356	292665	320347	226607	0.707379	-0.499445	-0.499445
						-2	5.64669	JL121323_121323_ABP_127_50B.13196.13196.6	P	4.746	0.187023	0.0161	//14	8//131	1.6255	0.441176	R.LKEFK[2329.2]EANK[425.27]IVFDPNTR.Q	Spt15	1	TBP	LKEFKEANKIVFDPNTR	11	//19	14//126	3.1205	1	R.DGTK[2752.54]PATTFQSEEDIKR.A	Spt15	1	TBP	DGTKPATTFQSEEDIKR	35	126.128	833527	127.131	644960	2.31069e+06	911639	711703	0.780686	-0.357187	-0.357187
						0	2.51106	JL121323_121323_ABP_127_100B.13318.13318.6	P	4.70125	0.150137	0.0146	//11	8//132	1.1715	0.470588	R.LK[425.27]EFK[2329.2]EANK[425.27]IVFDPNTR.Q	Spt15	1	TBP	LKEFKEANKIVFDPNTR	11	//19	16//126	3.52975	1.23529	R.DGTK[3049.72]PATTFQSEEDIKR.A	Spt15	1	TBP	DGTKPATTFQSEEDIKR	35	126.127	655010	127.13	364687	5.36063e+06	718120	402426	0.560388	-0.835502	-0.835502
						0	4.67404	JL121323_121323_ABP_127_30B.13513.13513.6	P	4.57375	0.136855	0.657	//15	13//129	1.90325	0.647059	R.DGTK[2511.36]PATTFQSEEDIK[425.27]R.A	Spt15	1	TBP	DGTKPATTFQSEEDIKR	35	//16	12//115	2.6705	1.06667	K.EFK[2626.38]EANK[425.27]IVFDPNTR.Q	Spt15	1	TBP	EFKEANKIVFDPNTR	11	126.128	2.01574e+06	127.131	1313687	4801746	2.20764e+06	1.44963e+06	0.656645	-0.606815	-0.606815
						-1	2.61187	JL121323_121323_ABP_127_30B.12941.12941.6	P	4.51175	0.160996	0.0782	//11	10//132	1.684	0.676471	R.LK[425.27]EFK[2329.2]EANK[425.27]IVFDPNTR.Q	Spt15	1	TBP	LKEFKEANKIVFDPNTR	11	//19	16//126	2.82775	1.17647	R.DGTK[3049.72]PATTFQSEEDIKR.A	Spt15	1	TBP	DGTKPATTFQSEEDIKR	35	126.127	1.12454e+06	127.131	737915	5435456	1.23153e+06	814277	0.661194	-0.596855	-0.596855
						0	-2.89358	JL121323_121323_ABP_127_30B.08965.08965.4	P	4.00325	0.140337	0.326	//19	17//97	3.26	1.02941	R.DGTK[1810.05]PATTFQSEEDIKR.A	Spt15	1	TBP	DGTKPATTFQSEEDIKR	35	//11	5//45	0.74325	0.722222	R.LK[425.27]EFK[2329.2]EANK.I	Spt15	1	TBP	LKEFKEANK	11	126.128	562906	127.131	324218	3.88251e+06	617010	357770	0.579844	-0.786264	-0.786264
						0	4.70369	JL121323_121323_ABP_127_50B.14619.14619.6	P	3.72775	0.13051	0.653	//14	11//131	1.59775	0.764706	R.LKEFK[2626.38]EANK[425.27]IVFDPNTR.Q	Spt15	1	TBP	LKEFKEANKIVFDPNTR	11	//15	14//129	2.13	0.764706	R.DGTK[2752.54]PATTFQSEEDIK[425.27]R.A	Spt15	1	TBP	DGTKPATTFQSEEDIKR	35	126.128	2042817	127.131	1.27763e+06	9491215	2.23794e+06	1.40985e+06	0.629976	-0.666632	-0.666632
						-1	6.16544	JL121323_121323_ABP_127_30B.07735.07735.4	P	3.68575	0.116943	0.359	//19	14//102	3.19775	1.14706	R.DGTK[1271.7]PATTFQSEEDIKR.A	Spt15	1	TBP	DGTKPATTFQSEEDIKR	35	1//9	4//28	0.488	0.714286	K.EFK[2329.2]EANK.I	Spt15	1	TBP	EFKEANK	11	126.128	228386	127.131	92807.7	559230	250809	102412	0.408326	-1.29221	-1.29221
						-1	-0.8606	JL121323_121323_ABP_127_30B.12504.12504.4	P	2.9675	0.11062	0.768	//11	10//98	1.78875	0.470588	R.LK[425.27]EFK[2329.2]EANK[425.27]IVFDPNTR.Q	Spt15	1	TBP	LKEFKEANKIVFDPNTR	11	//19	9//97	1.17875	0.411765	R.DGTK[3049.72]PATTFQSEEDIKR.A	Spt15	1	TBP	DGTKPATTFQSEEDIKR	35	126.127	195907	127.131	123333	1.0875e+06	214610	136096	0.634158	-0.657086	-0.657086
						0	3.05513	JL121323_121323_ABP_127_30B.07798.07798.5	NP	2.5215	0.0718632	0.0287	//19	14//131	1.512	0.676471	R.DGTK[1271.7]PATTFQSEEDIKR.A	Spt15	1	TBP	DGTKPATTFQSEEDIKR	35	//9	5//35	1.0095	0.928571	K.EFK[2329.2]EANK.I	Spt15	1	TBP	EFKEANK	11	126.128	347903	127.131	187155	347903	381503	206523	0.54134	-0.885394	-0.885394
						-1	5.2409	JL121323_121323_ABP_127_30B.07752.07752.6	P	2.4875	0.0878137	0.0461	//19	11//131	1.9315	0.617647	R.DGTK[1271.7]PATTFQSEEDIKR.A	Spt15	1	TBP	DGTKPATTFQSEEDIKR	35	//9	4//35	0.556	0.857143	K.EFK[2329.2]EANK.I	Spt15	1	TBP	EFKEANK	11	126.128	88257.1	127.131	54038.3	88257.1	96701.1	59630.3	0.616646	-0.697486	-0.697486
						0	-3.1513	JL121323_121323_ABP_127_50B.09485.09485.5	P	2.44425	0.0850174	0.8	//15	10//132	1.11825	0.411765	R.DGTK[1512.87]PATTFQSEEDIK[425.27]R.A	Spt15	1	TBP	DGTKPATTFQSEEDIKR	35	//11	4//49	1.326	0.666667	R.LKEFK[2626.38]EANK.I	Spt15	1	TBP	LKEFKEANK	11	126.127	589054	127.131	532124	782353	643328	587191	0.91274	-0.131725	-0.131725
						0	6.93807	JL121323_121323_ABP_127_100B.14220.14220.4	P	2.33725	0.109841	0.495	//11	7//98	1.326	0.382353	R.LK[425.27]EFK[2626.38]EANK[425.27]IVFDPNTR.Q	Spt15	1	TBP	LKEFKEANKIVFDPNTR	11	//15	7//98	1.01125	0.411765	R.DGTK[3049.72]PATTFQSEEDIK[425.27]R.A	Spt15	1	TBP	DGTKPATTFQSEEDIKR	35	126.127	183657	127.131	106154	1.97936e+06	201305	117139	0.581901	-0.781154	-0.781154
						0	0.0362446	JL121323_121323_ABP_127_30B.08256.08256.5	P	2.315	0.088643	0.0641	1//18	16//116	2.0905	0.96875	R.DGTK[1512.87]PATTFQSEEDIK.R	Spt15	1	TBP	DGTKPATTFQSEEDIK	35	//11	4//49	0.2245	0.333333	R.LKEFK[2173.1]EANK.I	Spt15	1	TBP	LKEFKEANK	11	126.128	158410	127.131	132715	490334	173131	146449	0.845885	-0.241467	-0.241467
						0	1.40077	JL121323_121323_ABP_127_50B.09540.09540.6	P	1.608	0.0611163	0.323	//15	10//132	0.81725	0.411765	R.DGTK[1512.87]PATTFQSEEDIK[425.27]R.A	Spt15	1	TBP	DGTKPATTFQSEEDIKR	35	//11	5//49	0.79075	0.722222	R.LKEFK[2626.38]EANK.I	Spt15	1	TBP	LKEFKEANK	11	126.127	416623	127.131	379257	416623	454974	418504	0.919842	-0.120541	-0.120541
	10	TBP:11---TBP:47	9.24675	-0.575114	0.575114
						0	2.90018	JL121323_121323_ABP_127_30B.07788.07788.4	NP	9.24675	0.243794	0.0107	//19	23//102	7.27525	1.88235	R.DGTKPATTFQSEEDIK[1271.7]R.A	Spt15	1	TBP	DGTKPATTFQSEEDIKR	47	1//9	8//28	1.9715	1.57143	K.EFK[2329.2]EANK.I	Spt15	1	TBP	EFKEANK	11	126.128	473790	127.131	242449	3.20872e+06	519699	267539	0.514796	-0.957928	-0.957928
						0	2.76514	JL121323_121323_ABP_127_30B.07799.07799.3	P	8.97875	0.357178	0.519	1//19	21//73	8.69425	1.85294	R.DGTKPATTFQSEEDIK[1271.7]R.A	Spt15	1	TBP	DGTKPATTFQSEEDIKR	47	//9	4//21	0.2845	0.571429	K.EFK[2329.2]EANK.I	Spt15	1	TBP	EFKEANK	11	126.128	150625	127.131	71002.3	1.16315e+06	165295	78349.9	0.474002	-1.07704	-1.07704
						-2	2.19559	JL121323_121323_ABP_127_30B.09600.09600.7	N	8.78275	0.302337		//9	7//45	1.5925	1.25	R.LK[2626.37]EFK[425.27]EANK.I	Spt15	1	TBP	LKEFKEANK	11	//15	16//98	7.19025	1.3125	R.DGTK[1810.04]PATTFQSEEDIK[425.27]R.A	Spt15	1	TBP	DGTKPATTFQSEEDIKR	47	126.127	732083	127.13	444816	1171685	802166	490847	0.611902	-0.708627	-0.708627
						-1	1.37356	JL121323_121323_ABP_127_30B.09754.09754.7	N	6.99075	0.245608		//9	7//45	1.4405	1.25	R.LK[2626.38]EFK[425.27]EANK.I	Spt15	1	TBP	LKEFKEANK	11	//15	15//98	5.55025	1.25	R.DGTK[1810.06]PATTFQSEEDIK[425.27]R.A	Spt15	1	TBP	DGTKPATTFQSEEDIKR	47	126.127	715287	127.131	408174	762947	784084	450414	0.574445	-0.799758	-0.799758
						0	1.91608	JL121323_121323_ABP_127_30B.09579.09579.5	N	6.15325	0.198566		//9	8//56	1.9235	1.3125	R.LK[2626.38]EFK[425.27]EANK.I	Spt15	1	TBP	LKEFKEANK	11	//15	14//129	4.22975	0.8125	R.DGTK[1810.06]PATTFQSEEDIK[425.27]R.A	Spt15	1	TBP	DGTKPATTFQSEEDIKR	47	126.128	1.00999e+06	127.131	771411	3.50413e+06	1.10476e+06	851239	0.770519	-0.376097	-0.376097
						-2	1.19778	JL121323_121323_ABP_127_30B.09787.09787.7	N	6.03625	0.202074		//9	7//45	1.484	1.25	R.LK[2626.38]EFK[425.27]EANK.I	Spt15	1	TBP	LKEFKEANK	11	//15	15//98	4.55225	1.25	R.DGTK[1810.06]PATTFQSEEDIK[425.27]R.A	Spt15	1	TBP	DGTKPATTFQSEEDIKR	47	126.127	746184	127.131	442098	1.06957e+06	817755	487848	0.59657	-0.745237	-0.745237
						0	0.963579	JL121323_121323_ABP_127_30B.09875.09875.5	P	6.01825	0.190801	0.255	//14	20//132	5.399	1.44118	R.DGTK[425.27]PATTFQSEEDIK[1810.05]R.A	Spt15	1	TBP	DGTKPATTFQSEEDIKR	47	//11	5//57	0.61925	0.388889	R.LK[425.27]EFK[2626.38]EANK.I	Spt15	1	TBP	LKEFKEANK	11	126.128	916466	127.131	598631	4.39871e+06	1.00369e+06	660579	0.658149	-0.603515	-0.603515
						0	2.59722	JL121323_121323_ABP_127_30B.08785.08785.4	N	5.32125	0.164745		//9	8//28	2.5365	2	K.EFK[2626.39]EANK.I	Spt15	1	TBP	EFKEANK	11	//15	11//103	2.78475	0.65625	R.DGTK[1271.7]PATTFQSEEDIK[425.27]R.A	Spt15	1	TBP	DGTKPATTFQSEEDIKR	47	126.128	176384	127.131	130861	722486	192982	144403	0.748271	-0.418368	-0.418368
						2568	-73.3316	JL121323_121323_ABP_127_30B.19813.19813.3	P	4.69275	0.14223	0.55	//11	14//64	4.54625	1.11765	R.LK[425.27]EFK[2626.38]EANK[425.27]IVFDPNTR.Q	Spt15	1	TBP	LKEFKEANKIVFDPNTR	11	//14	3//67	0.1465	0.0882353	R.DGTK[425.27]PATTFQSEEDIK[3049.72]R.A	Spt15	1	TBP	DGTKPATTFQSEEDIKR	47	126.127	1.00193e+06	127.131	805655	1.00193e+06	1.09545e+06	889027	0.811561	-0.301228	-0.301228
						-2	28.872	JL121323_121323_ABP_127_50B.25408.25408.5	P	2.90825	0.0947868	0.484	//16	8//121	1.87525	0.633333	K.E[111.03]FK[1928.01]EANK[425.27]IVFDPNTR.Q	Spt15	1	TBP	EFKEANKIVFDPNTR	11	1//15	5//85	1.033	0.5	K.PATTFQSEEDIK[2493.35]R.A	Spt15	1	TBP	PATTFQSEEDIKR	47	126.128	367796	127.131	290411	379104	402192	320464	0.796792	-0.327725	-0.327725
						-1	-4.23561	JL121323_121323_ABP_127_30B.30353.30353.4	P	0.95575	0.0239948	0.709	1//17	4//84	0.5625	0.2	K.EFK[1928.01]EANKIVFDPNTR.Q	Spt15	1	TBP	EFKEANKIVFDPNTR	11	//15	5//67	0.39325	0.269231	K.PATTFQSEEDIK[2214.19]R.A	Spt15	1	TBP	PATTFQSEEDIKR	47	126.128	250225	127.131	245602	300878	273042	271018	0.992584	-0.0107386	-0.0107386
	11	TBP:11---TBP:55	7.96375	-0.256685	0.256685
						0	-1.00996	JL121323_121323_ABP_127_30B.27441.27441.6	P	7.96375	0.291659	0.338	//	24//371	7.20775	0.579545	K.PATTFQSEEDIKRAAPESEK[2214.19]DTSATSGIVPTLQNIVATVTLGC[160.03]R.L	Spt15	1	TBP	PATTFQSEEDIKRAAPESEKDTSATSGIVPTLQNIVATVTLGCR	55	//17	7//108	0.756	0.366667	K.EFK[5095.62]EANKIVFDPNTR.Q	Spt15	1	TBP	EFKEANKIVFDPNTR	11	126.127	102972	127.13	81083.7	340808	112605	89474.6	0.79459	-0.331718	-0.331718
						-2	3.24258	JL121323_121323_ABP_127_30B.27130.27130.6	P	7.69125	0.283324	0.71	//	25//371	7.2425	0.613636	K.PATTFQSEEDIKRAAPESEK[2214.19]DTSATSGIVPTLQNIVATVTLGC[160.03]R.L	Spt15	1	TBP	PATTFQSEEDIKRAAPESEKDTSATSGIVPTLQNIVATVTLGCR	55	//17	4//108	0.44875	0.133333	K.EFK[5095.62]EANKIVFDPNTR.Q	Spt15	1	TBP	EFKEANKIVFDPNTR	11	126.128	101267	127.131	88398.3	200967	110635	97546.1	0.881692	-0.181653	-0.181653
	12	TBP:11---TBP:83	5.44475	-0.137126	0.137126
						0	-0.271701	JL121323_121323_ABP_127_50B.11225.11225.5	NP	5.44475	0.269542	0.0246	//13	14//64	4.27975	1.59091	R.LDLK[1512.87]TVALHAR.N	Spt15	1	TBP	LDLKTVALHAR	83	//11	8//49	1.165	1.11111	R.LKEFK[1643]EANK.I	Spt15	1	TBP	LKEFKEANK	11	126.128	314663	127.131	263992	1.36009e+06	343902	291311	0.847077	-0.239435	-0.239435
						-1	1.49844	JL121323_121323_ABP_127_50B.11191.11191.5	P	4.61575	0.213935	0.0283	1//13	15//64	3.76025	1.40909	R.LDLK[1512.87]TVALHAR.N	Spt15	1	TBP	LDLKTVALHAR	83	//11	7//49	0.8555	0.888889	R.LKEFK[1643]EANK.I	Spt15	1	TBP	LKEFKEANK	11	126.128	213119	127.131	205756	669308	232594	227048	0.976156	-0.0348164	-0.0348164
	13	TBP:11---TBP:97	5.9615	-0.308717	0.308717
						-1	5.91966	JL121323_121323_ABP_127_30B.10471.10471.5	NP	5.9615	0.217086	0.218	//16	23//119	4.893	1.8	K.EFK[1397.75]EANK[425.27]IVFDPNTR.Q	Spt15	1	TBP	EFKEANKIVFDPNTR	11	//10	6//41	1.0685	0.8125	R.NAEYNPK[2511.36]R.F	Spt15	1	TBP	NAEYNPKR	97	126.128	925887	127.131	617203	1.44814e+06	1.01386e+06	681074	0.671763	-0.573977	-0.573977
						0	1.40392	JL121323_121323_ABP_127_30B.05805.05805.3	P	3.71025	0.177363	0.476	//10	4//31	0.2935	0.375	R.NAEYNPK[1271.7]R.F	Spt15	1	TBP	NAEYNPKR	97	//9	9//26	3.41675	1.78571	K.EFK[1397.75]EANK.I	Spt15	1	TBP	EFKEANK	11	126.127	40406.5	127.131	27343	227912	44240.7	30172.5	0.682007	-0.552141	-0.552141
						0	3.04992	JL121323_121323_ABP_127_30B.06124.06124.4	NP	3.024	0.204753	0.544	1//11	7//42	1.24225	0.777778	R.LKEFK[1397.75]EANK.I	Spt15	1	TBP	LKEFKEANK	11	//10	5//36	1.78175	0.625	R.NAEYNPK[1512.87]R.F	Spt15	1	TBP	NAEYNPKR	97	126.127	25462.5	127.131	23348.3	29578.5	27804.3	25764.5	0.926637	-0.109924	-0.109924
						0	1.2547	JL121323_121323_ABP_127_30B.05807.05807.4	P	2.1025	0.0985955	0.757	//10	4//39	1.70125	0.5625	R.NAEYNPK[1271.7]R.F	Spt15	1	TBP	NAEYNPKR	97	//9	3//33	0.40125	0.214286	K.EFK[1397.75]EANK.I	Spt15	1	TBP	EFKEANK	11	126.128	39097.1	127.131	38689.4	68739.3	42658.4	42693.1	1.00082	0.00117533	0.00117533
	14	TBP:110---TBP:110	7.45175	-0.268712	0.268712
						-2	15.902	JL121323_121323_ABP_127_30B.10167.10167.5	N	7.45175	0.311867		1//12	12//72	3.7655	1.59091	R.E[111.03]PK[1769.06]TTALIFASGK.M	Spt15	1	TBP	EPKTTALIFASGK	110	//15	11//79	3.68625	1.41667	R.EPK[1751.05]TTALIFASGK.M	Spt15	1	TBP	EPKTTALIFASGK	110	126.127	679334	127.131	684367	1.43884e+06	741066	755187	1.01906	0.0272328	0.0272328
						0	12.1303	JL121323_121323_ABP_127_50B.19173.19173.5	N	7.342	0.263541		//12	10//72	3.671	1.5	R.E[111.03]PK[1751.04]TTALIFASGK.M	Spt15	1	TBP	EPKTTALIFASGK	110	//12	10//72	3.671	1.5	R.E[111.03]PK[1751.04]TTALIFASGK.M	Spt15	1	TBP	EPKTTALIFASGK	110	126.128	511313	127.131	343038	926353	559869	378537	0.676117	-0.564656	-0.564656
	15	TBP:110---TBP:127	12.2323	-0.475645	0.475645
						0	1.63195	JL121323_121323_ABP_127_30B.10664.10664.3	NP	12.2323	0.343946	5.92e-06	//17	18//59	7.27825	1.8	R.IREPK[1772.91]TTALIFASGK.M	Spt15	1	TBP	IREPKTTALIFASGK	110	//15	16//48	4.954	1.73077	K.MVVTGAK[2038.2]SEDDSK.L	Spt15	1	TBP	MVVTGAKSEDDSK	127	126.128	286270	127.131	222024	2016692	313091	244999	0.782518	-0.353804	-0.353804
						0	0.0923578	JL121323_121323_ABP_127_30B.09608.09608.3	NP	10.6255	0.314676	3.63e-05	//17	17//59	5.85225	1.53333	R.IREPK[1788.9]TTALIFASGK.M	Spt15	1	TBP	IREPKTTALIFASGK	110	//16	15//51	4.77325	1.57692	K.M[147.04]VVTGAK[2038.2]SEDDSK.L	Spt15	1	TBP	MVVTGAKSEDDSK	127	126.128	415831	127.131	307994	4.68724e+06	454966	339867	0.747015	-0.42079	-0.42079
						0	2.22064	JL121323_121323_ABP_127_30B.09606.09606.4	NP	9.77525	0.314145	6.31e-05	//17	15//82	3.17	1.1	R.IREPK[1788.9]TTALIFASGK.M	Spt15	1	TBP	IREPKTTALIFASGK	110	//16	20//69	6.60525	2.34615	K.M[147.04]VVTGAK[2038.2]SEDDSK.L	Spt15	1	TBP	MVVTGAKSEDDSK	127	126.128	1.39364e+06	127.131	1277430	10224598	1.52182e+06	1.40962e+06	0.926276	-0.110486	-0.110486
						-1	1.66921	JL121323_121323_ABP_127_30B.10649.10649.3	NP	9.73275	0.300356	0.000849	//17	15//59	4.949	1.3	R.IREPK[1772.91]TTALIFASGK.M	Spt15	1	TBP	IREPKTTALIFASGK	110	//15	17//48	4.78375	1.65385	K.MVVTGAK[2038.2]SEDDSK.L	Spt15	1	TBP	MVVTGAKSEDDSK	127	126.128	216232	127.131	173232	2.17248e+06	236423	191159	0.808544	-0.306601	-0.306601
						0	0.826699	JL121323_121323_ABP_127_30B.10680.10680.4	NP	7.641	0.280893	0.00779	//17	11//82	2.71025	0.966667	R.IREPK[1772.91]TTALIFASGK.M	Spt15	1	TBP	IREPKTTALIFASGK	110	//15	17//64	4.93075	1.65385	K.MVVTGAK[2038.2]SEDDSK.L	Spt15	1	TBP	MVVTGAKSEDDSK	127	126.128	1.71926e+06	127.131	1.2379e+06	6578679	1.8815e+06	1.366e+06	0.726017	-0.461925	-0.461925
						-2	2.25408	JL121323_121323_ABP_127_30B.11080.11080.5	NP	7.2835	0.258459	0.00425	//18	14//135	4.16075	1.02941	K.M[147.04]VVTGAK[1769.02]SEDDSK[425.27]LASR.K	Spt15	1	TBP	MVVTGAKSEDDSKLASR	127	1//15	12//78	3.12275	1.34615	R.EPK[2513.33]TTALIFASGK.M	Spt15	1	TBP	EPKTTALIFASGK	110	126.128	827084	127.131	682878	1.03379e+06	904070	753545	0.833502	-0.262742	-0.262742
						-2	2.0826	JL121323_121323_ABP_127_30B.10668.10668.7	NP	6.8915	0.230516	9.89e-05	//18	13//135	3.09025	1	K.M[147.04]VVTGAK[2038.2]SEDDSK[425.27]LASR.K	Spt15	1	TBP	MVVTGAKSEDDSKLASR	127	1//17	12//105	3.80125	1.03333	R.IREPK[2513.33]TTALIFASGK.M	Spt15	1	TBP	IREPKTTALIFASGK	110	126.128	377640	127.131	235395	714440	413720	259754	0.627851	-0.671505	-0.671505
						0	2.68191	JL121323_121323_ABP_127_30B.10630.10630.5	NP	6.8505	0.279641	0.0263	//18	12//135	3.2915	0.852941	K.M[147.04]VVTGAK[2038.2]SEDDSK[425.27]LASR.K	Spt15	1	TBP	MVVTGAKSEDDSKLASR	127	//17	16//105	3.559	1.43333	R.IREPK[2513.33]TTALIFASGK.M	Spt15	1	TBP	IREPKTTALIFASGK	110	126.127	2.99265e+06	127.131	1417754	24254114	3.28402e+06	1.56447e+06	0.476389	-1.06979	-1.06979
						0	-0.547644	JL121323_121323_ABP_127_50B.12631.12631.5	NP	6.79875	0.239464	0.00487	//18	16//135	4.47175	1.23529	K.M[147.04]VVTGAK[1769.02]SEDDSK[425.27]LASR.K	Spt15	1	TBP	MVVTGAKSEDDSKLASR	127	//15	9//78	2.327	0.884615	R.EPK[2513.33]TTALIFASGK.M	Spt15	1	TBP	EPKTTALIFASGK	110	126.128	792215	127.131	697288	833559	865431	769445	0.88909	-0.169599	-0.169599
						-1	1.49747	JL121323_121323_ABP_127_30B.10757.10757.4	NP	6.73275	0.347964	0.0879	//17	8//82	1.93425	0.733333	R.IREPK[1772.91]TTALIFASGK.M	Spt15	1	TBP	IREPKTTALIFASGK	110	//15	15//64	4.7985	1.57692	K.MVVTGAK[2038.2]SEDDSK.L	Spt15	1	TBP	MVVTGAKSEDDSK	127	126.127	798584	127.131	747317	2163916	871848	824652	0.945866	-0.0802919	-0.0802919
						0	1.17606	JL121323_121323_ABP_127_30B.11331.11331.5	NP	6.577	0.275286	0.0345	//18	10//129	2.87475	0.676471	K.MVVTGAK[2038.2]SEDDSK[425.27]LASR.K	Spt15	1	TBP	MVVTGAKSEDDSKLASR	127	//17	15//105	3.70225	1.5	R.IREPK[2497.34]TTALIFASGK.M	Spt15	1	TBP	IREPKTTALIFASGK	110	126.128	1.36542e+06	127.131	723656	9371013	1.49742e+06	798542	0.533279	-0.907038	-0.907038
						-1	3.02197	JL121323_121323_ABP_127_50B.10854.10854.3	NP	6.45375	0.229671	0.174	//17	10//59	2.91425	0.866667	R.IREPK[1788.9]TTALIFASGK.M	Spt15	1	TBP	IREPKTTALIFASGK	110	//16	12//51	3.5395	1.11538	K.M[147.04]VVTGAK[2038.2]SEDDSK.L	Spt15	1	TBP	MVVTGAKSEDDSK	127	126.128	134553	127.131	122811	854402	146935	135520	0.922313	-0.116672	-0.116672
						-1	4.24574	JL121323_121323_ABP_127_50B.10876.10876.3	NP	6.3745	0.196232	0.0752	1//17	12//59	3.045	0.933333	R.IREPK[1788.9]TTALIFASGK.M	Spt15	1	TBP	IREPKTTALIFASGK	110	//16	13//51	3.3295	1.15385	K.M[147.04]VVTGAK[2038.2]SEDDSK.L	Spt15	1	TBP	MVVTGAKSEDDSK	127	126.128	144286	127.131	127951	866528	157609	141192	0.895837	-0.158692	-0.158692
						0	-2.61282	JL121323_121323_ABP_127_30B.11117.11117.4	NP	6.145	0.259452	0.398	//18	10//103	1.811	0.558824	K.M[147.04]VVTGAK[1769.02]SEDDSK[425.27]LASR.K	Spt15	1	TBP	MVVTGAKSEDDSKLASR	127	2//15	12//63	4.334	1.38462	R.EPK[2513.33]TTALIFASGK.M	Spt15	1	TBP	EPKTTALIFASGK	110	126.127	587904	127.131	356641	2.93655e+06	644192	393547	0.610916	-0.710954	-0.710954
						0	-0.0870402	JL121323_121323_ABP_127_30B.11367.11367.4	NP	6.06025	0.249907	0.14	//18	9//99	3.27425	0.617647	K.MVVTGAK[2038.2]SEDDSK[425.27]LASR.K	Spt15	1	TBP	MVVTGAKSEDDSKLASR	127	//17	11//82	2.786	0.966667	R.IREPK[2497.34]TTALIFASGK.M	Spt15	1	TBP	IREPKTTALIFASGK	110	126.127	1.1008e+06	127.131	493547	8796308	1.20831e+06	544621	0.45073	-1.14966	-1.14966
						-1	4.51827	JL121323_121323_ABP_127_30B.11154.11154.5	NP	5.99725	0.221972	0.404	//18	15//135	3.763	0.970588	K.M[147.04]VVTGAK[1769.02]SEDDSK[425.27]LASR.K	Spt15	1	TBP	MVVTGAKSEDDSKLASR	127	//15	8//78	2.23425	0.846154	R.EPK[2513.33]TTALIFASGK.M	Spt15	1	TBP	EPKTTALIFASGK	110	126.127	627543	127.131	600317	743892	684956	662440	0.967127	-0.0482234	-0.0482234
						0	1.99814	JL121323_121323_ABP_127_50B.10882.10882.4	NP	5.9705	0.220269	0.13	//17	12//82	1.77675	0.933333	R.IREPK[1788.9]TTALIFASGK.M	Spt15	1	TBP	IREPKTTALIFASGK	110	//16	13//69	4.19375	1.26923	K.M[147.04]VVTGAK[2038.2]SEDDSK.L	Spt15	1	TBP	MVVTGAKSEDDSK	127	126.127	621577	127.131	581116	2252835	678609	641251	0.94495	-0.0816904	-0.0816904
						0	-0.0870402	JL121323_121323_ABP_127_30B.11343.11343.4	P	5.67975	0.232882	0.326	//18	8//99	2.60475	0.5	K.MVVTGAK[2038.2]SEDDSK[425.27]LASR.K	Spt15	1	TBP	MVVTGAKSEDDSKLASR	127	//17	11//82	3.075	0.933333	R.IREPK[2497.34]TTALIFASGK.M	Spt15	1	TBP	IREPKTTALIFASGK	110	126.128	791688	127.131	383319	6337946	868666	422986	0.486938	-1.03819	-1.03819
						0	-0.0870402	JL121323_121323_ABP_127_30B.11336.11336.4	NP	5.49625	0.234337	0.137	//18	9//99	3.23225	0.558824	K.MVVTGAK[2038.2]SEDDSK[425.27]LASR.K	Spt15	1	TBP	MVVTGAKSEDDSKLASR	127	//17	10//82	2.264	0.766667	R.IREPK[2497.34]TTALIFASGK.M	Spt15	1	TBP	IREPKTTALIFASGK	110	126.128	670820	127.131	362378	5454964	735589	399879	0.543617	-0.879337	-0.879337
						0	-0.671894	JL121323_121323_ABP_127_50B.10895.10895.4	NP	5.46075	0.184488	0.272	//17	11//82	1.82775	0.833333	R.IREPK[1788.9]TTALIFASGK.M	Spt15	1	TBP	IREPKTTALIFASGK	110	//16	11//69	3.633	1.07692	K.M[147.04]VVTGAK[2038.2]SEDDSK.L	Spt15	1	TBP	MVVTGAKSEDDSK	127	126.128	579721	127.131	596919	2.14619e+06	632244	658690	1.04183	0.0591175	0.0591175
						-1	-0.0351053	JL121323_121323_ABP_127_50B.12051.12051.4	NP	5.31475	0.18265	0.742	//18	12//103	3.34625	0.794118	K.M[147.04]VVTGAK[2038.2]SEDDSK[425.27]LASR.K	Spt15	1	TBP	MVVTGAKSEDDSKLASR	127	//17	7//82	1.9685	0.7	R.IREPK[2513.33]TTALIFASGK.M	Spt15	1	TBP	IREPKTTALIFASGK	110	126.128	250002	127.131	177972	1.38307e+06	273618	196389	0.717749	-0.478449	-0.478449
						0	-2.66523	JL121323_121323_ABP_127_50B.12612.12612.5	NP	4.927	0.183208	0.084	//18	12//135	2.718	0.794118	K.M[147.04]VVTGAK[1769.02]SEDDSK[425.27]LASR.K	Spt15	1	TBP	MVVTGAKSEDDSKLASR	127	//15	8//78	2.209	0.846154	R.EPK[2513.33]TTALIFASGK.M	Spt15	1	TBP	EPKTTALIFASGK	110	126.127	782613	127.131	730985	812692	854429	806630	0.944057	-0.0830534	-0.0830534
						0	0.535778	JL121323_121323_ABP_127_30B.10613.10613.6	NP	4.83275	0.234247	0.00434	//18	11//135	2.85725	0.705882	K.M[147.04]VVTGAK[2038.2]SEDDSK[425.27]LASR.K	Spt15	1	TBP	MVVTGAKSEDDSKLASR	127	1//17	12//105	1.9755	0.933333	R.IREPK[2513.33]TTALIFASGK.M	Spt15	1	TBP	IREPKTTALIFASGK	110	126.128	707016	127.131	512548	1.24402e+06	773691	565588	0.731025	-0.452007	-0.452007
						-1	3.55146	JL121323_121323_ABP_127_30B.10795.10795.4	NP	4.6585	0.172742	0.237	//18	12//103	2.9955	0.705882	K.M[147.04]VVTGAK[2038.2]SEDDSK[425.27]LASR.K	Spt15	1	TBP	MVVTGAKSEDDSKLASR	127	//17	8//82	1.663	0.7	R.IREPK[2513.33]TTALIFASGK.M	Spt15	1	TBP	IREPKTTALIFASGK	110	126.128	371724	127.131	257312	2.23658e+06	406928	283939	0.697763	-0.51919	-0.51919
						0	0.900514	JL121323_121323_ABP_127_70B.11106.11106.6	NP	4.571	0.201953	0.0164	//18	11//135	3.414	0.941176	K.M[147.04]VVTGAK[2038.2]SEDDSK[425.27]LASR.K	Spt15	1	TBP	MVVTGAKSEDDSKLASR	127	1//17	9//105	1.157	0.666667	R.IREPK[2513.33]TTALIFASGK.M	Spt15	1	TBP	IREPKTTALIFASGK	110	126.128	348964	127.131	241573	911342	382012	266572	0.69781	-0.519094	-0.519094
						-1	3.8369	JL121323_121323_ABP_127_50B.12063.12063.5	NP	4.51725	0.210384	0.747	//18	12//135	2.22725	0.705882	K.M[147.04]VVTGAK[2038.2]SEDDSK[425.27]LASR.K	Spt15	1	TBP	MVVTGAKSEDDSKLASR	127	//17	11//105	2.29	0.8	R.IREPK[2513.33]TTALIFASGK.M	Spt15	1	TBP	IREPKTTALIFASGK	110	126.128	998828	127.131	747200	4.42304e+06	1.09274e+06	824523	0.754545	-0.406321	-0.406321
						0	0.937523	JL121323_121323_ABP_127_30B.10606.10606.4	P	4.50975	0.191428	0.452	//18	10//103	2.49475	0.5	K.M[147.04]VVTGAK[2038.2]SEDDSK[425.27]LASR.K	Spt15	1	TBP	MVVTGAKSEDDSKLASR	127	//17	8//82	2.015	0.7	R.IREPK[2513.33]TTALIFASGK.M	Spt15	1	TBP	IREPKTTALIFASGK	110	126.128	540993	127.131	265868	4265241	593547	293381	0.494284	-1.01659	-1.01659
						0	0.535778	JL121323_121323_ABP_127_30B.10607.10607.6	NP	4.4425	0.210216	0.0483	//18	11//135	2.5605	0.764706	K.M[147.04]VVTGAK[2038.2]SEDDSK[425.27]LASR.K	Spt15	1	TBP	MVVTGAKSEDDSKLASR	127	1//17	12//105	1.882	0.933333	R.IREPK[2513.33]TTALIFASGK.M	Spt15	1	TBP	IREPKTTALIFASGK	110	126.128	650466	127.131	495234	1.11487e+06	711520	546482	0.768048	-0.380731	-0.380731
						0	3.3691	JL121323_121323_ABP_127_50B.12096.12096.4	P	4.114	0.204301	0.61	//18	10//103	2.571	0.5	K.M[147.04]VVTGAK[2038.2]SEDDSK[425.27]LASR.K	Spt15	1	TBP	MVVTGAKSEDDSKLASR	127	//17	8//82	1.543	0.633333	R.IREPK[2513.33]TTALIFASGK.M	Spt15	1	TBP	IREPKTTALIFASGK	110	126.128	824212	127.131	413187	7067830	904181	455945	0.504264	-0.98775	-0.98775
						-1	4.38143	JL121323_121323_ABP_127_30B.10650.10650.5	P	4.0255	0.173293	0.451	//17	6//105	0.86	0.533333	R.IREPK[1772.91]TTALIFASGK.M	Spt15	1	TBP	IREPKTTALIFASGK	110	//15	12//80	3.1655	1.03846	K.MVVTGAK[2038.2]SEDDSK.L	Spt15	1	TBP	MVVTGAKSEDDSK	127	126.128	879441	127.131	793177	1.44416e+06	960485	875257	0.911266	-0.134056	-0.134056
						0	4.27013	JL121323_121323_ABP_127_30B.11413.11413.6	NP	3.97725	0.180731	0.494	//18	9//129	2.9785	0.735294	K.MVVTGAK[2038.2]SEDDSK[425.27]LASR.K	Spt15	1	TBP	MVVTGAKSEDDSKLASR	127	1//17	7//105	0.99875	0.6	R.IREPK[2497.34]TTALIFASGK.M	Spt15	1	TBP	IREPKTTALIFASGK	110	126.128	1.32361e+06	127.131	843342	3.02334e+06	1.44985e+06	930614	0.641869	-0.63965	-0.63965
						0	-2.3333	JL121323_121323_ABP_127_30B.11315.11315.5	P	3.742	0.162738	0.475	//18	6//129	1.488	0.323529	K.MVVTGAK[2038.2]SEDDSK[425.27]LASR.K	Spt15	1	TBP	MVVTGAKSEDDSKLASR	127	1//17	13//105	2.254	0.966667	R.IREPK[2497.34]TTALIFASGK.M	Spt15	1	TBP	IREPKTTALIFASGK	110	126.128	864894	127.131	566704	3810199	947191	625348	0.660213	-0.598996	-0.598996
						0	4.45323	JL121323_121323_ABP_127_30B.11438.11438.6	P	2.8095	0.129074	0.393	//18	10//129	2.18725	0.588235	K.MVVTGAK[2038.2]SEDDSK[425.27]LASR.K	Spt15	1	TBP	MVVTGAKSEDDSKLASR	127	1//17	6//105	0.62225	0.366667	R.IREPK[2497.34]TTALIFASGK.M	Spt15	1	TBP	IREPKTTALIFASGK	110	126.128	910699	127.131	620792	2.07859e+06	997062	685033	0.687052	-0.541508	-0.541508
	16	TBP:110---TBP:133	6.6585	-0.470075	0.470075
						-1	1.45673	JL121323_121323_ABP_127_70B.11583.11583.5	N	6.6585	0.237867		//15	9//78	2.0255	0.958333	R.EPK[2513.34]TTALIFASGK.M	Spt15	1	TBP	EPKTTALIFASGK	110	//18	17//129	4.633	1.34375	K.M[147.04]VVTGAK[1769.02]SEDDSK[425.27]LASR.K	Spt15	1	TBP	MVVTGAKSEDDSKLASR	133	126.127	294099	127.131	253723	294099	321342	279979	0.871283	-0.198787	-0.198787
						-1	4.75176	JL121323_121323_ABP_127_30B.11365.11365.3	N	5.2335	0.189695		//17	6//59	1.257	0.571429	R.IREPK[2497.36]TTALIFASGK.M	Spt15	1	TBP	IREPKTTALIFASGK	110	//18	11//69	3.9765	0.875	K.MVVTGAK[2038.22]SEDDSK[425.27]LASR.K	Spt15	1	TBP	MVVTGAKSEDDSKLASR	133	126.128	216570	127.131	98071.5	2.12758e+06	237710	108220	0.455262	-1.13523	-1.13523
						0	1.28469	JL121323_121323_ABP_127_30B.10409.10409.4	P	5.158	0.18204	0.132	//17	15//82	4.451	1.26667	R.IREPK[1513.78]TTALIFASGK.M	Spt15	1	TBP	IREPKTTALIFASGK	110	//12	4//44	0.707	0.6	K.SEDDSK[2038.2]LASR.K	Spt15	1	TBP	SEDDSKLASR	133	126.128	757134	127.131	846126	3.10996e+06	824923	933687	1.13185	0.178679	0.178679
						0	5.55275	JL121323_121323_ABP_127_50B.12636.12636.4	N	5.05225	0.198829		1//15	11//63	3.32575	1.25	R.EPK[2513.35]TTALIFASGK.M	Spt15	1	TBP	EPKTTALIFASGK	110	//18	8//99	1.7265	0.5625	K.M[147.04]VVTGAK[1769.04]SEDDSK[425.27]LASR.K	Spt15	1	TBP	MVVTGAKSEDDSKLASR	133	126.127	518047	127.13	419894	1.72528e+06	566362	463346	0.818109	-0.289635	-0.289635
						-1	1.28581	JL121323_121323_ABP_127_70B.11084.11084.5	N	4.84175	0.199652		//17	11//105	2.219	0.928571	R.IREPK[2513.34]TTALIFASGK.M	Spt15	1	TBP	IREPKTTALIFASGK	110	//18	11//129	2.62275	0.8125	K.M[147.04]VVTGAK[2038.21]SEDDSK[425.27]LASR.K	Spt15	1	TBP	MVVTGAKSEDDSKLASR	133	126.128	350275	127.131	257017	2.02895e+06	383270	283614	0.739984	-0.434433	-0.434433
						-1	1.62864	JL121323_121323_ABP_127_30B.10654.10654.7	N	4.7845	0.165628		//17	10//82	2.4345	0.857143	R.IREPK[2513.34]TTALIFASGK.M	Spt15	1	TBP	IREPKTTALIFASGK	110	//18	11//99	2.35	0.90625	K.M[147.04]VVTGAK[2038.21]SEDDSK[425.27]LASR.K	Spt15	1	TBP	MVVTGAKSEDDSKLASR	133	126.128	299328	127.131	208999	481579	327654	230627	0.703875	-0.506609	-0.506609
						0	1.10707	JL121323_121323_ABP_127_1ug.11650.11650.5	N	4.71975	0.221777		//17	13//105	2.67625	1.32143	R.IREPK[2513.34]TTALIFASGK.M	Spt15	1	TBP	IREPKTTALIFASGK	110	//18	9//129	2.0435	0.59375	K.M[147.04]VVTGAK[2038.21]SEDDSK[425.27]LASR.K	Spt15	1	TBP	MVVTGAKSEDDSKLASR	133	126.128	672614	127.131	432185	6777603	736719	476909	0.647341	-0.627402	-0.627402
						0	0.926065	JL121323_121323_ABP_127_D.12948.12948.4	N	4.53675	0.152889		//17	6//82	1.815	0.607143	R.IREPK[2513.33]TTALIFASGK.M	Spt15	1	TBP	IREPKTTALIFASGK	110	//18	9//99	2.72175	0.5625	K.M[147.04]VVTGAK[2038.2]SEDDSK[425.27]LASR.K	Spt15	1	TBP	MVVTGAKSEDDSKLASR	133	126.128	359073	127.131	174650	3.28577e+06	393977	192723	0.489173	-1.03158	-1.03158
						-2	1.20036	JL121323_121323_ABP_127_30B.10749.10749.7	N	4.486	0.194849		//17	6//82	2.3235	0.607143	R.IREPK[2513.33]TTALIFASGK.M	Spt15	1	TBP	IREPKTTALIFASGK	110	//18	10//99	2.1625	0.875	K.M[147.04]VVTGAK[2038.2]SEDDSK[425.27]LASR.K	Spt15	1	TBP	MVVTGAKSEDDSKLASR	133	126.128	353957	127.131	297271	495800	386843	328034	0.847976	-0.237905	-0.237905
						0	8.92172	JL121323_121323_ABP_127_70B.11074.11074.4	N	4.44725	0.152737		//17	6//82	1.41175	0.607143	R.IREPK[2513.37]TTALIFASGK.M	Spt15	1	TBP	IREPKTTALIFASGK	110	//18	11//99	3.0355	0.71875	K.M[147.04]VVTGAK[2038.24]SEDDSK[425.27]LASR.K	Spt15	1	TBP	MVVTGAKSEDDSKLASR	133	126.127	217884	127.131	144360	1.94462e+06	238597	159299	0.667648	-0.582841	-0.582841
						0	4.57541	JL121323_121323_ABP_127_70B.11588.11588.4	N	4.27375	0.177103		2//15	9//63	2.4785	0.958333	R.EPK[2513.35]TTALIFASGK.M	Spt15	1	TBP	EPKTTALIFASGK	110	//18	8//99	1.79525	0.5625	K.M[147.04]VVTGAK[1769.03]SEDDSK[425.27]LASR.K	Spt15	1	TBP	MVVTGAKSEDDSKLASR	133	126.127	273263	127.131	219151	1.09724e+06	298777	241830	0.809399	-0.305077	-0.305077
	17	TBP:110---TBP:138	7.5665	-0.383868	0.383868
						0	0.748008	JL121323_121323_ABP_127_50B.09415.09415.5	P	7.5665	0.347111	0.000451	//17	23//112	7.49225	2.06667	R.IREPK[943.57]TTALIFASGK.M	Spt15	1	TBP	IREPKTTALIFASGK	110	//5	3//23	0.07425	0.375	R.K[2038.2]YAR.I	Spt15	1	TBP	KYAR	138	126.128	321678	127.131	244383	1.02205e+06	351878	269672	0.76638	-0.383868	-0.383868
	18	TBP:110---TBP:15	5.441	-0.0815145	0.0815145
						-1	-3.04663	JL121323_121323_ABP_127_30B.11996.11996.4	P	5.441	0.238614	0.751	//16	5//88	0.53925	0.233333	K.EFK[425.27]EANK[1769.02]IVFDPNTR.Q	Spt15	1	TBP	EFKEANKIVFDPNTR	15	1//15	15//63	4.90175	1.42308	R.EPK[2511.36]TTALIFASGK.M	Spt15	1	TBP	EPKTTALIFASGK	110	126.127	435222	127.131	419608	2258914	475000	463031	0.974801	-0.0368198	-0.0368198
						-1	-1.77896	JL121323_121323_ABP_127_30B.12019.12019.5	P	3.1185	0.108607	0.125	//16	10//115	1.67875	0.666667	K.EFK[425.27]EANK[1769.02]IVFDPNTR.Q	Spt15	1	TBP	EFKEANKIVFDPNTR	15	//15	9//78	1.43975	0.846154	R.EPK[2511.36]TTALIFASGK.M	Spt15	1	TBP	EPKTTALIFASGK	110	126.128	729062	127.131	676754	729062	796015	746787	0.938157	-0.0920991	-0.0920991
						-2	-0.458852	JL121323_121323_ABP_127_30B.12010.12010.5	P	2.25075	0.0876494	0.768	//16	9//115	0.7175	0.366667	K.EFK[425.27]EANK[1769.02]IVFDPNTR.Q	Spt15	1	TBP	EFKEANKIVFDPNTR	15	1//15	9//78	1.53325	0.846154	R.EPK[2511.36]TTALIFASGK.M	Spt15	1	TBP	EPKTTALIFASGK	110	126.128	833594	127.131	761397	833594	910298	840189	0.922983	-0.115624	-0.115624
	19	TBP:110---TBP:35	7.94875	-0.296941	0.296941
						0	-5.17617	JL121323_121323_ABP_127_30B.10962.10962.4	NP	7.94875	0.328569	4.38e-05	//19	23//97	4.78675	1.44118	R.DGTK[2038.2]PATTFQSEEDIKR.A	Spt15	1	TBP	DGTKPATTFQSEEDIKR	35	//17	13//82	3.162	1.13333	R.IREPK[2329.2]TTALIFASGK.M	Spt15	1	TBP	IREPKTTALIFASGK	110	126.127	482290	127.131	369667	3.43364e+06	527529	407922	0.773268	-0.370959	-0.370959
						-2	0.812592	JL121323_121323_ABP_127_30B.11061.11061.4	NP	6.46725	0.25	0.00667	//19	18//97	4.0655	1.08824	R.DGTK[2038.2]PATTFQSEEDIKR.A	Spt15	1	TBP	DGTKPATTFQSEEDIKR	35	1//17	9//82	2.40175	0.733333	R.IREPK[2329.2]TTALIFASGK.M	Spt15	1	TBP	IREPKTTALIFASGK	110	126.127	443404	127.131	320622	2.77835e+06	485230	353801	0.729141	-0.45573	-0.45573
						-1	-2.37985	JL121323_121323_ABP_127_50B.12536.12536.6	NP	5.9095	0.214594	0.000574	//19	21//126	4.204	1.35294	R.DGTK[2038.2]PATTFQSEEDIKR.A	Spt15	1	TBP	DGTKPATTFQSEEDIKR	35	1//17	10//105	1.7055	0.8	R.IREPK[2329.2]TTALIFASGK.M	Spt15	1	TBP	IREPKTTALIFASGK	110	126.127	588702	127.131	564517	588702	642546	622936	0.96948	-0.0447163	-0.0447163
						2415	42.817	JL121323_121323_ABP_127_70B.14561.14561.3	P	5.6945	0.183652	0.000528	2//12	12//82	1.7265	0.636364	R.IREPK[2329.2]TTALIFASGK[425.27]M[147.04]VVTGAK.S	Spt15	1	TBP	IREPKTTALIFASGKMVVTGAK	110	//19	17//68	3.968	1.38235	R.DGTK[3037.75]PATTFQSEEDIKR.A	Spt15	1	TBP	DGTKPATTFQSEEDIKR	35	126.128	674908	127.131	488733	674908	738562	539309	0.730214	-0.453609	-0.453609
						-1	1.25856	JL121323_121323_ABP_127_50B.12513.12513.4	NP	4.52025	0.190804	0.365	//19	13//97	2.79575	0.764706	R.DGTK[2038.2]PATTFQSEEDIKR.A	Spt15	1	TBP	DGTKPATTFQSEEDIKR	35	//17	9//82	1.7245	0.733333	R.IREPK[2329.2]TTALIFASGK.M	Spt15	1	TBP	IREPKTTALIFASGK	110	126.127	291432	127.131	280372	944908	318075	309386	0.972681	-0.0399616	-0.0399616
						-1	-2.5128	JL121323_121323_ABP_127_30B.10951.10951.3	P	3.1685	0.121194	0.627	//19	11//68	1.8825	0.558824	R.DGTK[2038.2]PATTFQSEEDIKR.A	Spt15	1	TBP	DGTKPATTFQSEEDIKR	35	//17	6//59	1.286	0.466667	R.IREPK[2329.2]TTALIFASGK.M	Spt15	1	TBP	IREPKTTALIFASGK	110	126.127	146694	127.131	108960	1028035	160496	120236	0.749151	-0.416671	-0.416671
	20	TBP:110---TBP:47	5.12875	-0.170927	0.170927
						0	2.33063	JL121323_121323_ABP_127_30B.12517.12517.6	N	5.12875	0.19458		//17	7//82	1.056	0.75	R.IREPK[2626.37]TTALIFASGK.M	Spt15	1	TBP	IREPKTTALIFASGK	110	//15	15//98	4.07275	1.09375	R.DGTK[2038.19]PATTFQSEEDIK[425.27]R.A	Spt15	1	TBP	DGTKPATTFQSEEDIKR	47	126.127	1.03985e+06	127.13	914414	1.93059e+06	1.13596e+06	1.00904e+06	0.888272	-0.170927	-0.170927
	21	TBP:110---TBP:55	17.0555	-0.163979	0.163979
						0	2.51226	JL121323_121323_ABP_127_30B.30380.30380.5	NP	17.0555	0.485926	0.0463	//15	40//255	15.5418	1.77419	R.AAPESEK[2038.2]DTSATSGIVPTLQNIVATVTLGC[160.03]R.L	Spt15	1	TBP	AAPESEKDTSATSGIVPTLQNIVATVTLGCR	55	//17	12//105	1.51375	0.866667	R.IREPK[3592.89]TTALIFASGK.M	Spt15	1	TBP	IREPKTTALIFASGK	110	126.128	137785	127.131	117525	887055	150564	129687	0.86134	-0.215345	-0.215345
						0	-0.707139	JL121323_121323_ABP_127_30B.30422.30422.4	NP	16.0147	0.481328	0.0199	//15	34//186	14.0705	1.6129	R.AAPESEK[2038.2]DTSATSGIVPTLQNIVATVTLGC[160.03]R.L	Spt15	1	TBP	AAPESEKDTSATSGIVPTLQNIVATVTLGCR	55	//17	10//82	1.94425	0.866667	R.IREPK[3592.89]TTALIFASGK.M	Spt15	1	TBP	IREPKTTALIFASGK	110	126.128	49197.7	127.131	41908.8	281433	53761.4	46245.6	0.860202	-0.217252	-0.217252
						-1	4.09384	JL121323_121323_ABP_127_30B.30339.30339.5	N	14.7995	0.425401		//17	10//105	1.229	0.857143	R.IREPK[3592.86]TTALIFASGK.M	Spt15	1	TBP	IREPKTTALIFASGK	110	//15	35//255	13.5705	1.56667	R.AAPESEK[2038.18]DTSATSGIVPTLQNIVATVTLGC[160.03]R.L	Spt15	1	TBP	AAPESEKDTSATSGIVPTLQNIVATVTLGCR	55	126.127	110319	127.13	92570.4	440615	120569	102150	0.847229	-0.239176	-0.239176
						-2	6.11494	JL121323_121323_ABP_127_30B.30430.30430.6	P	9.847	0.269364	0.0308	//15	29//255	9.515	1.24194	R.AAPESEK[2038.2]DTSATSGIVPTLQNIVATVTLGC[160.03]R.L	Spt15	1	TBP	AAPESEKDTSATSGIVPTLQNIVATVTLGCR	55	//17	6//105	0.332	0.366667	R.IREPK[3592.89]TTALIFASGK.M	Spt15	1	TBP	IREPKTTALIFASGK	110	126.127	112248	127.131	112201	436056	122459	123812	1.01105	0.0158587	0.0158587
	22	TBP:110---TBP:83	6.37725	-0.219954	0.219954
						1573	25.7327	JL121323_121323_ABP_127_50B.16845.16845.3	P	6.37725	0.223975	0.00104	//17	9//59	3.0375	0.933333	R.IREPK[1643]TTALIFASGK.M	Spt15	1	TBP	IREPKTTALIFASGK	110	//13	9//38	3.33975	1.18182	R.LDLK[2038.2]TVALHAR.N	Spt15	1	TBP	LDLKTVALHAR	83	126.127	282717	127.131	242859	1.0466e+06	308918	267991	0.867514	-0.205041	-0.205041
						0	-1.39951	JL121323_121323_ABP_127_50B.16820.16820.5	NP	5.75275	0.210208	0.00424	//17	12//105	1.68375	0.933333	R.IREPK[1643]TTALIFASGK.M	Spt15	1	TBP	IREPKTTALIFASGK	110	//13	18//62	4.069	2.13636	R.LDLK[2038.2]TVALHAR.N	Spt15	1	TBP	LDLKTVALHAR	83	126.128	568059	127.131	478081	1.65854e+06	620825	527554	0.849763	-0.234867	-0.234867
	23	TBP:120---TBP:15	4.98675	-0.345017	0.345017
						-3	18.2179	JL121323_121323_ABP_127_50B.20498.20498.5	N	4.98675	0.154839		1//16	12//115	3.07825	0.892857	K.EFK[425.27]EANK[2768.48]IVFDPNTR.Q	Spt15	1	TBP	EFKEANKIVFDPNTR	15	//15	12//152	1.9085	0.605263	R.EPK[2511.28]TTALIFASGK[425.27]M[147.04]VVTGAK.S	Spt15	1	TBP	EPKTTALIFASGKMVVTGAK	120	126.128	408222	127.131	318523	1.03346e+06	446445	351485	0.787299	-0.345017	-0.345017
	24	TBP:120---TBP:35	9.75275	-0.586625	0.586625
						-1	-3.11126	JL121323_121323_ABP_127_50B.15385.15385.7	P	9.75275	0.353623	0.49	//16	7//161	0.207	0.175	R.E[111.03]PK[425.27]TTALIFASGK[2329.2]MVVTGAK.S	Spt15	1	TBP	EPKTTALIFASGKMVVTGAK	120	//19	24//126	9.54575	2.29412	R.DGTK[2734.56]PATTFQSEEDIKR.A	Spt15	1	TBP	DGTKPATTFQSEEDIKR	35	126.127	411969	127.131	270870	1.48888e+06	451158	298901	0.66252	-0.593964	-0.593964
						0	-1.88406	JL121323_121323_ABP_127_50B.18635.18635.6	P	5.71525	0.170363	0.551	1//16	12//161	1.0185	0.35	R.E[111.03]PK[425.27]TTALIFASGK[2626.38]MVVTGAK.S	Spt15	1	TBP	EPKTTALIFASGKMVVTGAK	120	//15	19//129	4.69675	1.38235	R.DGTK[2734.56]PATTFQSEEDIK[425.27]R.A	Spt15	1	TBP	DGTKPATTFQSEEDIKR	35	126.127	744875	127.131	494729	1.17911e+06	815672	545925	0.669295	-0.579286	-0.579286
	25	TBP:120---TBP:83	4.40725	-0.259896	0.259896
						0	-0.558103	JL121323_121323_ABP_127_50B.20216.20216.5	NP	4.40725	0.166001	0.00317	1//19	17//121	3.29425	1.08824	K.TTALIFASGK[1643]M[147.04]VVTGAK.S	Spt15	1	TBP	TTALIFASGKMVVTGAK	120	//13	10//62	1.113	0.909091	R.LDLK[2117.2]TVALHAR.N	Spt15	1	TBP	LDLKTVALHAR	83	126.128	268786	127.131	222356	288989	293800	245366	0.835148	-0.259896	-0.259896
	26	TBP:120---TBP:97	8.337	-0.0534456	0.0534456
						0	3.17241	JL121323_121323_ABP_127_50B.12966.12966.4	P	8.337	0.269775	0.122	//19	22//94	8.2555	1.94118	K.TTALIFASGK[1397.75]M[147.04]VVTGAK.S	Spt15	1	TBP	TTALIFASGKMVVTGAK	120	//10	2//33	0.0815	0.25	R.NAEYNPK[2117.2]R.F	Spt15	1	TBP	NAEYNPKR	97	126.128	1.12798e+06	127.131	1.06874e+06	1.12798e+06	1.23131e+06	1.17933e+06	0.95779	-0.0622193	-0.0622193
						0	2.18916	JL121323_121323_ABP_127_50B.12823.12823.4	P	7.50925	0.235396	0.5	1//19	22//94	7.37975	1.88235	K.TTALIFASGK[1397.75]M[147.04]VVTGAK.S	Spt15	1	TBP	TTALIFASGKMVVTGAK	120	//10	4//33	0.1295	0.5	R.NAEYNPK[2117.2]R.F	Spt15	1	TBP	NAEYNPKR	97	126.127	879883	127.131	863301	879883	960120	952638	0.992207	-0.0112866	-0.0112866
						-1	2.54185	JL121323_121323_ABP_127_30B.11289.11289.3	P	7.48625	0.24714	0.749	1//19	22//67	7.4025	1.73529	K.TTALIFASGK[1397.75]M[147.04]VVTGAK.S	Spt15	1	TBP	TTALIFASGKMVVTGAK	120	//10	2//25	0.08375	0.125	R.NAEYNPK[2117.2]R.F	Spt15	1	TBP	NAEYNPKR	97	126.127	306220	127.131	274476	957220	334460	302879	0.905576	-0.143093	-0.143093
						0	0.657287	JL121323_121323_ABP_127_50B.12850.12850.3	P	6.8495	0.237192	0.199	1//19	20//67	6.74975	1.64706	K.TTALIFASGK[1397.75]M[147.04]VVTGAK.S	Spt15	1	TBP	TTALIFASGKMVVTGAK	120	//10	2//25	0.09975	0.125	R.NAEYNPK[2117.2]R.F	Spt15	1	TBP	NAEYNPKR	97	126.127	356660	127.131	336088	1.31981e+06	389352	370868	0.952525	-0.0701716	-0.0701716
						-1	3.09047	JL121323_121323_ABP_127_30B.11281.11281.4	P	6.6	0.218445	0.277	1//19	22//94	6.5925	1.79412	K.TTALIFASGK[1397.75]M[147.04]VVTGAK.S	Spt15	1	TBP	TTALIFASGKMVVTGAK	120	//10	1//33	0.0075	0.0625	R.NAEYNPK[2117.2]R.F	Spt15	1	TBP	NAEYNPKR	97	126.128	863906	127.131	853515	949762	942615	941840	0.999178	-0.00118617	-0.00118617
						0	1.6156	JL121323_121323_ABP_127_100B.12687.12687.4	P	5.93775	0.191537	0.000227	//19	17//94	5.69425	1.55882	K.TTALIFASGK[1397.75]M[147.04]VVTGAK.S	Spt15	1	TBP	TTALIFASGKMVVTGAK	120	//10	2//33	0.2435	0.25	R.NAEYNPK[2117.2]R.F	Spt15	1	TBP	NAEYNPKR	97	126.128	103825	127.131	100382	178513	113311	110770	0.977577	-0.0327171	-0.0327171
	27	TBP:133---TBP:138	3.9015	-0.126918	0.126918
						0	0.69052	JL121323_121323_ABP_127_30B.05292.05292.4	P	3.9015	0.18141	0.579	//12	12//52	3.8475	1.5	K.SEDDSK[943.57]LASR.K	Spt15	1	TBP	SEDDSKLASR	133	//5	1//21	0.054	0.125	R.K[1513.78]YAR.I	Spt15	1	TBP	KYAR	138	126.128	58028.4	127.131	46211.8	247540	63450.4	50994	0.803682	-0.315303	-0.315303
						0	1.51618	JL121323_121323_ABP_127_30B.05630.05630.4	P	3.7835	0.201132	0.0971	//12	10//52	3.182	1.3	K.SEDDSK[943.57]LASR.K	Spt15	1	TBP	SEDDSKLASR	133	//5	3//21	0.6015	1	R.K[1513.78]YAR.I	Spt15	1	TBP	KYAR	138	126.127	40435.8	127.131	40460.2	83882.2	44113.6	44647.2	1.0121	0.017347	0.017347
						0	1.00808	JL121323_121323_ABP_127_30B.05668.05668.4	P	3.725	0.212766	0.218	//12	10//52	3.2345	1.4	K.SEDDSK[943.57]LASR.K	Spt15	1	TBP	SEDDSKLASR	133	//5	3//21	0.4905	1	R.K[1513.78]YAR.I	Spt15	1	TBP	KYAR	138	126.127	43870.5	127.131	45036.9	102946	47846.8	49697.5	1.03868	0.0547486	0.0547486
						0	2.78643	JL121323_121323_ABP_127_30B.05461.05461.4	P	3.59975	0.176204	0.0661	//12	11//52	3.43575	1.3	K.SEDDSK[943.57]LASR.K	Spt15	1	TBP	SEDDSKLASR	133	//5	2//21	0.164	0.5	R.K[1513.78]YAR.I	Spt15	1	TBP	KYAR	138	126.128	56672.8	127.131	46736.2	115026	61948.6	51572.7	0.832507	-0.264466	-0.264466
	28	TBP:133---TBP:15	5.98375	-0.446249	0.446249
						0	0.397607	JL121323_121323_ABP_127_100B.12336.12336.5	P	5.98375	0.210866	0.00321	//14	23//130	4.8665	1.64706	R.LKEFK[425.27]EANK[1513.78]IVFDPNTR.Q	Spt15	1	TBP	LKEFKEANKIVFDPNTR	15	//12	5//54	1.11725	0.65	K.SEDDSK[2752.54]LASR.K	Spt15	1	TBP	SEDDSKLASR	133	126.127	137286	127.131	97636.3	658394	150256	107740	0.717042	-0.479871	-0.479871
						0	0.753776	JL121323_121323_ABP_127_50B.13942.13942.6	P	5.4365	0.240894	0.0758	//11	20//134	3.766	1.38235	R.LK[425.27]EFK[425.27]EANK[1513.78]IVFDPNTR.Q	Spt15	1	TBP	LKEFKEANKIVFDPNTR	15	//12	7//54	1.6705	1	K.SEDDSK[3049.72]LASR.K	Spt15	1	TBP	SEDDSKLASR	133	126.128	1.25263e+06	127.131	782183	1.90275e+06	1.3723e+06	863126	0.628965	-0.668948	-0.668948
						694	-89.7445	JL121323_121323_ABP_127_30B.11186.11186.4	P	5.27025	0.146634	0.0193	//16	19//88	4.525	1.53333	K.EFK[425.27]EANK[1513.78]IVFDPNTR.Q	Spt15	1	TBP	EFKEANKIVFDPNTR	15	//12	7//44	0.74525	0.85	K.SEDDSK[2511.36]LASR.K	Spt15	1	TBP	SEDDSKLASR	133	126.128	3.49575e+06	127.131	2546661	4154000	3.82527e+06	2.8102e+06	0.73464	-0.444891	-0.444891
						0	-0.0644409	JL121323_121323_ABP_127_70B.12873.12873.6	P	4.78925	0.204045	0.0218	//11	20//134	3.60925	1.35294	R.LK[425.27]EFK[425.27]EANK[1513.78]IVFDPNTR.Q	Spt15	1	TBP	LKEFKEANKIVFDPNTR	15	//12	5//54	1.18	0.6	K.SEDDSK[3049.72]LASR.K	Spt15	1	TBP	SEDDSKLASR	133	126.128	456755	127.131	261790	788985	500672	288881	0.576986	-0.793391	-0.793391
						-1	1.75185	JL121323_121323_ABP_127_30B.10862.10862.6	P	4.25225	0.187068	0.0359	//14	13//130	2.94325	0.970588	R.LKEFK[425.27]EANK[1513.78]IVFDPNTR.Q	Spt15	1	TBP	LKEFKEANKIVFDPNTR	15	//12	6//54	1.309	0.8	K.SEDDSK[2752.54]LASR.K	Spt15	1	TBP	SEDDSKLASR	133	126.128	990953	127.131	881985	1.21139e+06	1.08242e+06	973256	0.899151	-0.153365	-0.153365
						-2	-6.94114	JL121323_121323_ABP_127_30B.25209.25209.5	P	1.92375	0.0610462	0.769	1//20	5//130	0.404	0.205882	K.M[147.04]VVTGAKSEDDSK[1791.97]LASR.K	Spt15	1	TBP	MVVTGAKSEDDSKLASR	133	//15	7//79	1.51975	0.75	K.E[111.03]ANK[2216.16]IVFDPNTR.Q	Spt15	1	TBP	EANKIVFDPNTR	15	126.127	250817	127.131	225754	581094	273937	249116	0.909391	-0.137028	-0.137028
	29	TBP:133---TBP:151	5.464	-0.270849	0.270849
						-1	5.63927	JL121323_121323_ABP_127_70B.18472.18472.5	P	5.464	0.192527	1.52e-08	//17	18//112	5.0385	1.53333	R.IIQK[425.27]IGFAAK[1513.78]FTDFK.I	Spt15	1	TBP	IIQKIGFAAKFTDFK	151	//12	5//54	0.4255	0.5	K.SEDDSK[2430.42]LASR.K	Spt15	1	TBP	SEDDSKLASR	133	126.128	332914	127.131	270540	412195	363955	298536	0.820256	-0.285853	-0.285853
						0	7.42192	JL121323_121323_ABP_127_30B.14299.14299.4	NP	5.30475	0.180424	0.0283	1//13	14//53	3.832	1.59091	K.IGFAAK[1513.78]FTDFK.I	Spt15	1	TBP	IGFAAKFTDFK	151	//12	10//44	1.47275	1.25	K.SEDDSK[1650.92]LASR.K	Spt15	1	TBP	SEDDSKLASR	133	126.127	1.03822e+06	127.131	840571	1.06899e+06	1.13506e+06	927556	0.817185	-0.291265	-0.291265
						0	0.550856	JL121323_121323_ABP_127_1ug.14935.14935.4	NP	5.29975	0.17548	0.132	//13	14//53	4.2365	1.72727	K.IGFAAK[1513.78]FTDFK.I	Spt15	1	TBP	IGFAAKFTDFK	151	//12	8//44	1.06325	0.9	K.SEDDSK[1650.92]LASR.K	Spt15	1	TBP	SEDDSKLASR	133	126.127	218136	127.131	192308	286471	238292	212209	0.89054	-0.167248	-0.167248
						0	4.63659	JL121323_121323_ABP_127_30B.18506.18506.5	P	4.911	0.167605	0.0261	//17	16//112	4.484	1.36667	R.IIQK[425.27]IGFAAK[1513.78]FTDFK.I	Spt15	1	TBP	IIQKIGFAAKFTDFK	151	//12	6//54	0.427	0.65	K.SEDDSK[2430.42]LASR.K	Spt15	1	TBP	SEDDSKLASR	133	126.128	877094	127.131	722316	909516	958757	797063	0.83135	-0.266471	-0.266471
						-1	-1.70176	JL121323_121323_ABP_127_70B.18528.18528.5	P	4.87025	0.177103	7.07e-05	//17	17//112	4.419	1.43333	R.IIQK[425.27]IGFAAK[1513.78]FTDFK.I	Spt15	1	TBP	IIQKIGFAAKFTDFK	151	//12	6//54	0.45125	0.65	K.SEDDSK[2430.42]LASR.K	Spt15	1	TBP	SEDDSKLASR	133	126.128	236103	127.131	208202	236103	257918	229748	0.890778	-0.166863	-0.166863
						0	-1.00346	JL121323_121323_ABP_127_50B.20151.20151.5	P	4.74075	0.163836	0.0294	//17	15//112	4.233	1.26667	R.IIQK[425.27]IGFAAK[1513.78]FTDFK.I	Spt15	1	TBP	IIQKIGFAAKFTDFK	151	//12	6//54	0.50775	0.65	K.SEDDSK[2430.42]LASR.K	Spt15	1	TBP	SEDDSKLASR	133	126.128	698837	127.131	532088	806169	764432	587151	0.768088	-0.380657	-0.380657
						-1	5.83232	JL121323_121323_ABP_127_30B.18498.18498.6	P	4.24475	0.145115	0.558	//17	13//112	3.09175	1	R.IIQK[425.27]IGFAAK[1513.78]FTDFK.I	Spt15	1	TBP	IIQKIGFAAKFTDFK	151	//12	6//54	1.153	0.8	K.SEDDSK[2430.42]LASR.K	Spt15	1	TBP	SEDDSKLASR	133	126.128	260422	127.131	204241	501396	284794	225376	0.791367	-0.337582	-0.337582
	30	TBP:133---TBP:156	10.514	-0.229306	0.229306
						-1	9.43953	JL121323_121323_ABP_127_30B.14609.14609.3	P	10.514	0.330795	0.036	1//18	24//64	9.786	2.21875	K.FTDFK[1513.78]IQNIVGSC[160.03]DVK.F	Spt15	1	TBP	FTDFKIQNIVGSCDVK	156	//12	5//34	0.728	0.65	K.SEDDSK[2277.19]LASR.K	Spt15	1	TBP	SEDDSKLASR	133	126.127	290166	127.131	238040	1.00989e+06	317194	262673	0.828116	-0.272094	-0.272094
						-1	5.16507	JL121323_121323_ABP_127_30B.14589.14589.3	P	9.71225	0.29894	0.0889	1//18	22//64	8.93175	2	K.FTDFK[1513.78]IQNIVGSC[160.03]DVK.F	Spt15	1	TBP	FTDFKIQNIVGSCDVK	156	//12	6//34	0.7805	0.7	K.SEDDSK[2277.19]LASR.K	Spt15	1	TBP	SEDDSKLASR	133	126.127	253238	127.131	208505	752700	276817	230082	0.83117	-0.266785	-0.266785
						0	1.753	JL121323_121323_ABP_127_50B.16492.16492.3	P	9.65625	0.331318	0.39	1//18	21//64	9.03575	1.9375	K.FTDFK[1513.78]IQNIVGSC[160.03]DVK.F	Spt15	1	TBP	FTDFKIQNIVGSCDVK	156	//12	4//34	0.6205	0.6	K.SEDDSK[2277.19]LASR.K	Spt15	1	TBP	SEDDSKLASR	133	126.127	265934	127.131	218856	710915	290696	241504	0.830779	-0.267463	-0.267463
						-1	6.86702	JL121323_121323_ABP_127_30B.14617.14617.4	P	9.211	0.292803	0.0089	//18	24//90	8.762	2.21875	K.FTDFK[1513.78]IQNIVGSC[160.03]DVK.F	Spt15	1	TBP	FTDFKIQNIVGSCDVK	156	1//12	5//44	0.449	0.5	K.SEDDSK[2277.19]LASR.K	Spt15	1	TBP	SEDDSKLASR	133	126.128	885441	127.131	685606	885441	968412	756556	0.781234	-0.356174	-0.356174
						0	4.56514	JL121323_121323_ABP_127_70B.15171.15171.3	P	8.93625	0.267645	0.773	//18	18//64	8.3935	1.6875	K.FTDFK[1513.78]IQNIVGSC[160.03]DVK.F	Spt15	1	TBP	FTDFKIQNIVGSCDVK	156	//12	4//34	0.54275	0.45	K.SEDDSK[2277.19]LASR.K	Spt15	1	TBP	SEDDSKLASR	133	126.127	221951	127.131	171178	781826	242757	188892	0.778112	-0.361951	-0.361951
						-1	3.47778	JL121323_121323_ABP_127_70B.15179.15179.3	P	8.6805	0.277346	0.00453	//18	17//64	7.9175	1.5625	K.FTDFK[1513.78]IQNIVGSC[160.03]DVK.F	Spt15	1	TBP	FTDFKIQNIVGSCDVK	156	//12	4//34	0.763	0.6	K.SEDDSK[2277.19]LASR.K	Spt15	1	TBP	SEDDSKLASR	133	126.127	236996	127.131	184303	893057	259194	203375	0.784645	-0.349888	-0.349888
						0	-0.73931	JL121323_121323_ABP_127_50B.24814.24814.5	P	7.95575	0.240759	0.744	//12	30//172	7.7095	1.65909	K.IGFAAK[425.27]FTDFK[1513.78]IQNIVGSC[160.03]DVK.F	Spt15	1	TBP	IGFAAKFTDFKIQNIVGSCDVK	156	//12	4//54	0.24625	0.3	K.SEDDSK[3161.71]LASR.K	Spt15	1	TBP	SEDDSKLASR	133	126.127	422300	127.131	356123	749749	461518	392976	0.851486	-0.231946	-0.231946
						-2	0.764405	JL121323_121323_ABP_127_50B.24839.24839.5	P	3.645	0.118344	0.347	//12	23//172	3.44625	1.11364	K.IGFAAK[425.27]FTDFK[1513.78]IQNIVGSC[160.03]DVK.F	Spt15	1	TBP	IGFAAKFTDFKIQNIVGSCDVK	156	1//12	6//54	0.19875	0.4	K.SEDDSK[3161.71]LASR.K	Spt15	1	TBP	SEDDSKLASR	133	126.127	449304	127.131	418256	527934	490551	461539	0.940859	-0.0879488	-0.0879488
						0	6.33184	JL121323_121323_ABP_127_50B.25977.25977.5	P	3.35625	0.104714	0.0459	//20	6//130	0.3765	0.294118	K.M[147.04]VVTGAKSEDDSK[2277.19]LASR.K	Spt15	1	TBP	MVVTGAKSEDDSKLASR	133	//18	12//116	2.97975	1.03125	K.FTDFK[2216.16]IQNIVGSC[160.03]DVK.F	Spt15	1	TBP	FTDFKIQNIVGSCDVK	156	126.127	364843	127.131	349908	364843	398211	386118	0.969631	-0.0444921	-0.0444921
						-1	4.18835	JL121323_121323_ABP_127_50B.25967.25967.5	P	2.9415	0.0902314	0.056	//20	5//130	0.35475	0.264706	K.M[147.04]VVTGAKSEDDSK[2277.19]LASR.K	Spt15	1	TBP	MVVTGAKSEDDSKLASR	133	//18	12//116	2.58675	0.9375	K.FTDFK[2216.16]IQNIVGSC[160.03]DVK.F	Spt15	1	TBP	FTDFKIQNIVGSCDVK	156	126.128	350214	127.131	333622	350214	382272	368146	0.963047	-0.0543221	-0.0543221
	31	TBP:133---TBP:35	16.4688	-0.437202	0.437202
						0	3.40572	JL121323_121323_ABP_127_30B.07984.07984.4	P	16.4688	0.518293	0.00209	//19	34//100	15.6275	3.17647	R.DGTK[1513.78]PATTFQSEEDIKR.A	Spt15	1	TBP	DGTKPATTFQSEEDIKR	35	//12	5//44	0.84125	0.65	K.SEDDSK[2329.2]LASR.K	Spt15	1	TBP	SEDDSKLASR	133	126.127	307325	127.13	185892	2.13745e+06	336756	205129	0.609134	-0.715169	-0.715169
						0	4.01065	JL121323_121323_ABP_127_30B.07879.07879.5	NP	13.4458	0.423375	6.73e-05	//19	33//129	11.8055	2.85294	R.DGTK[1513.78]PATTFQSEEDIKR.A	Spt15	1	TBP	DGTKPATTFQSEEDIKR	35	//12	9//54	1.64025	1.05	K.SEDDSK[2329.2]LASR.K	Spt15	1	TBP	SEDDSKLASR	133	126.128	1.16843e+06	127.131	614933	4.00777e+06	1.28144e+06	678568	0.529536	-0.917199	-0.917199
						0	-1.09678	JL121323_121323_ABP_127_50B.08197.08197.4	P	13.2265	0.401277	0.00155	//19	33//100	12.416	3.02941	R.DGTK[1513.78]PATTFQSEEDIKR.A	Spt15	1	TBP	DGTKPATTFQSEEDIKR	35	//12	6//44	0.8105	0.7	K.SEDDSK[2329.2]LASR.K	Spt15	1	TBP	SEDDSKLASR	133	126.128	331255	127.131	257283	852475	362286	283907	0.783655	-0.35171	-0.35171
						0	0.68913	JL121323_121323_ABP_127_1ug.08296.08296.5	NP	12.5823	0.436429	0.00537	//19	28//129	10.3468	2.26471	R.DGTK[1513.78]PATTFQSEEDIKR.A	Spt15	1	TBP	DGTKPATTFQSEEDIKR	35	//12	9//54	2.2355	1.1	K.SEDDSK[2329.2]LASR.K	Spt15	1	TBP	SEDDSKLASR	133	126.127	136837	127.131	79159.6	334657	149985	87351.3	0.582398	-0.779922	-0.779922
						-1	5.22854	JL121323_121323_ABP_127_30B.08081.08081.5	NP	12.2993	0.427139	0.000248	//19	28//129	10.5355	2.17647	R.DGTK[1513.78]PATTFQSEEDIKR.A	Spt15	1	TBP	DGTKPATTFQSEEDIKR	35	//12	8//54	1.76375	0.9	K.SEDDSK[2329.2]LASR.K	Spt15	1	TBP	SEDDSKLASR	133	126.128	133018	127.131	94442.2	205072	145586	104215	0.715833	-0.482305	-0.482305
						0	19.2343	JL121323_121323_ABP_127_30B.07856.07856.5	NP	12.2812	0.425266	0.00134	//19	27//129	10.3157	2.29412	R.DGTK[1513.78]PATTFQSEEDIKR.A	Spt15	1	TBP	DGTKPATTFQSEEDIKR	35	//12	9//54	1.9655	1.1	K.SEDDSK[2329.2]LASR.K	Spt15	1	TBP	SEDDSKLASR	133	126.127	205818	127.13	140746	450257	225330	155311	0.689261	-0.536877	-0.536877
						0	-0.694835	JL121323_121323_ABP_127_1ug.08348.08348.5	NP	12.2007	0.335208	0.00568	//19	29//129	10.236	2.5	R.DGTK[1513.78]PATTFQSEEDIKR.A	Spt15	1	TBP	DGTKPATTFQSEEDIKR	35	//12	9//54	1.96475	1.1	K.SEDDSK[2329.2]LASR.K	Spt15	1	TBP	SEDDSKLASR	133	126.127	403971	127.131	205224	878032	443133	226462	0.511047	-0.968472	-0.968472
						1	2.23917	JL121323_121323_ABP_127_30B.08363.08363.5	P	11.4292	0.435267	0.000158	//19	25//129	10.221	2.14706	R.DGTK[1513.78]PATTFQSEEDIKR.A	Spt15	1	TBP	DGTKPATTFQSEEDIKR	35	//12	6//54	1.20825	0.55	K.SEDDSK[2329.2]LASR.K	Spt15	1	TBP	SEDDSKLASR	133	126.128	234365	127.132	193759	265212	256177	213810	0.834617	-0.260813	-0.260813
						-1	3.91849	JL121323_121323_ABP_127_30B.08599.08599.5	N	11.0725	0.376859		//19	23//126	9.0555	2.125	R.DGTK[2513.35]PATTFQSEEDIKR.A	Spt15	1	TBP	DGTKPATTFQSEEDIKR	35	//18	12//130	2.017	0.65625	K.M[147.04]VVTGAK[425.27]SEDDSK[2329.22]LASR.K	Spt15	1	TBP	MVVTGAKSEDDSKLASR	133	126.127	118378	127.131	101727	785089	129349	112254	0.867841	-0.204498	-0.204498
						0	11.7015	JL121323_121323_ABP_127_30B.07961.07961.6	NP	10.9648	0.432168	0.0019	//19	22//129	9.609	2.05882	R.DGTK[1513.78]PATTFQSEEDIKR.A	Spt15	1	TBP	DGTKPATTFQSEEDIKR	35	//12	6//54	1.35575	0.65	K.SEDDSK[2329.2]LASR.K	Spt15	1	TBP	SEDDSKLASR	133	126.128	132731	127.131	91803.1	518543	145303	101303	0.697188	-0.52038	-0.52038
						-1	1.51007	JL121323_121323_ABP_127_30B.08592.08592.5	N	10.6148	0.354386		//19	23//126	9.241	2.03125	R.DGTK[2513.34]PATTFQSEEDIKR.A	Spt15	1	TBP	DGTKPATTFQSEEDIKR	35	//18	12//130	1.37375	0.5625	K.M[147.04]VVTGAK[425.27]SEDDSK[2329.21]LASR.K	Spt15	1	TBP	MVVTGAKSEDDSKLASR	133	126.127	113533	127.131	104601	768862	123969	115426	0.931083	-0.103019	-0.103019
						0	5.57914	JL121323_121323_ABP_127_50B.08134.08134.5	NP	10.4842	0.395961	0.000442	//19	24//129	8.53425	1.97059	R.DGTK[1513.78]PATTFQSEEDIKR.A	Spt15	1	TBP	DGTKPATTFQSEEDIKR	35	//12	9//54	1.95	1.1	K.SEDDSK[2329.2]LASR.K	Spt15	1	TBP	SEDDSKLASR	133	126.127	389062	127.131	349359	442913	424934	385512	0.907227	-0.140464	-0.140464
						-1	1.91235	JL121323_121323_ABP_127_1ug.08316.08316.6	N	10.4567	0.426989		//12	6//44	1.676	0.888889	K.SEDDSK[2329.21]LASR.K	Spt15	1	TBP	SEDDSKLASR	133	//19	23//100	8.78075	2.3125	R.DGTK[1513.79]PATTFQSEEDIKR.A	Spt15	1	TBP	DGTKPATTFQSEEDIKR	35	126.127	221609	127.131	150416	1.55421e+06	242633	165982	0.684087	-0.547747	-0.547747
						1653	-90.257	JL121323_121323_ABP_127_50B.08150.08150.3	P	9.058	0.356116	0.0164	//19	18//71	7.382	1.58824	R.DGTK[1513.78]PATTFQSEEDIKR.A	Spt15	1	TBP	DGTKPATTFQSEEDIKR	35	1//12	6//34	1.676	0.7	K.SEDDSK[2329.2]LASR.K	Spt15	1	TBP	SEDDSKLASR	133	126.127	508265	127.131	480645	508265	554833	530384	0.955934	-0.0650169	-0.0650169
						1	-5.14198	JL121323_121323_ABP_127_50B.08222.08222.5	P	8.9435	0.391323	0.0415	//19	24//129	7.24375	2.02941	R.DGTK[1513.78]PATTFQSEEDIKR.A	Spt15	1	TBP	DGTKPATTFQSEEDIKR	35	//12	8//54	1.69975	0.9	K.SEDDSK[2329.2]LASR.K	Spt15	1	TBP	SEDDSKLASR	133	126.127	378116	127.131	375014	435941	412548	413822	1.00309	0.00444686	0.00444686
						0	2.53983	JL121323_121323_ABP_127_30B.09205.09205.5	P	8.829	0.248915	0.00466	//15	25//132	8.0265	2	R.DGTK[1513.78]PATTFQSEEDIK[425.27]R.A	Spt15	1	TBP	DGTKPATTFQSEEDIKR	35	//12	8//54	0.8025	0.8	K.SEDDSK[2626.38]LASR.K	Spt15	1	TBP	SEDDSKLASR	133	126.128	1.61155e+06	127.131	853716	3.10231e+06	1.76736e+06	942062	0.533035	-0.907699	-0.907699
						1	-4.71354	JL121323_121323_ABP_127_30B.08400.08400.4	P	8.63325	0.243242	0.13	//19	26//100	8.42975	2.05882	R.DGTK[1513.78]PATTFQSEEDIKR.A	Spt15	1	TBP	DGTKPATTFQSEEDIKR	35	//12	4//44	0.2035	0.2	K.SEDDSK[2329.2]LASR.K	Spt15	1	TBP	SEDDSKLASR	133	126.128	267560	127.131	195157	1.08453e+06	292778	215352	0.735548	-0.443108	-0.443108
						1653	58.6576	JL121323_121323_ABP_127_30B.07855.07855.3	P	8.37325	0.288554	0.000836	//19	20//71	7.5015	2	R.DGTK[1513.78]PATTFQSEEDIKR.A	Spt15	1	TBP	DGTKPATTFQSEEDIKR	35	//12	5//34	0.87175	0.65	K.SEDDSK[2329.2]LASR.K	Spt15	1	TBP	SEDDSKLASR	133	126.128	173945	127.131	147116	173945	190093	162341	0.854005	-0.227684	-0.227684
						0	11.9678	JL121323_121323_ABP_127_30B.08690.08690.4	P	8.1775	0.248995	0.0383	//19	22//100	7.80375	1.88235	R.DGTK[1513.78]PATTFQSEEDIKR.A	Spt15	1	TBP	DGTKPATTFQSEEDIKR	35	1//12	5//44	0.37375	0.35	K.SEDDSK[2329.2]LASR.K	Spt15	1	TBP	SEDDSKLASR	133	126.128	127522	127.131	99212.3	278297	139465	109479	0.784992	-0.34925	-0.34925
						-1	5.16305	JL121323_121323_ABP_127_30B.08925.08925.5	N	7.7855	0.33435		//12	7//54	0.99225	0.833333	K.SEDDSK[2329.22]LASR.K	Spt15	1	TBP	SEDDSKLASR	133	//19	20//129	6.79325	1.84375	R.DGTK[1513.8]PATTFQSEEDIKR.A	Spt15	1	TBP	DGTKPATTFQSEEDIKR	35	126.128	229607	127.131	203845	583863	250806	224940	0.896869	-0.157031	-0.157031
						0	2.44215	JL121323_121323_ABP_127_50B.08426.08426.5	NP	6.98475	0.275077	0.371	//19	20//129	5.0285	1.58824	R.DGTK[1513.78]PATTFQSEEDIKR.A	Spt15	1	TBP	DGTKPATTFQSEEDIKR	35	//12	7//54	1.95625	0.75	K.SEDDSK[2329.2]LASR.K	Spt15	1	TBP	SEDDSKLASR	133	126.127	351357	127.131	342143	451241	383429	377550	0.984665	-0.0222949	-0.0222949
						-2	3.21717	JL121323_121323_ABP_127_50B.08415.08415.5	NP	6.63775	0.25953	0.144	//19	21//129	5.03775	1.44118	R.DGTK[1513.78]PATTFQSEEDIKR.A	Spt15	1	TBP	DGTKPATTFQSEEDIKR	35	//12	7//54	1.6	0.85	K.SEDDSK[2329.2]LASR.K	Spt15	1	TBP	SEDDSKLASR	133	126.128	340827	127.131	339706	340827	371843	374860	1.00811	0.0116569	0.0116569
						0	3.50125	JL121323_121323_ABP_127_30B.09206.09206.6	NP	6.19375	0.211002	0.000397	//15	15//132	4.9615	1.26471	R.DGTK[1513.78]PATTFQSEEDIK[425.27]R.A	Spt15	1	TBP	DGTKPATTFQSEEDIKR	35	//12	7//54	1.23225	0.85	K.SEDDSK[2626.38]LASR.K	Spt15	1	TBP	SEDDSKLASR	133	126.128	886152	127.131	479244	917133	971705	528838	0.544237	-0.877693	-0.877693
						0	4.51715	JL121323_121323_ABP_127_1ug.09863.09863.6	NP	6.0145	0.186121	0.653	//15	15//132	4.73425	1.32353	R.DGTK[1513.78]PATTFQSEEDIK[425.27]R.A	Spt15	1	TBP	DGTKPATTFQSEEDIKR	35	//12	7//54	1.28025	0.85	K.SEDDSK[2626.38]LASR.K	Spt15	1	TBP	SEDDSKLASR	133	126.128	441082	127.131	248270	484922	483548	273962	0.566566	-0.819684	-0.819684
						0	3.91025	JL121323_121323_ABP_127_1ug.09308.09308.4	N	5.93825	0.159587		1//12	7//44	0.9925	0.833333	K.SEDDSK[2173.11]LASR.K	Spt15	1	TBP	SEDDSKLASR	133	//18	24//91	4.94575	2.03333	R.DGTK[1513.79]PATTFQSEEDIK.R	Spt15	1	TBP	DGTKPATTFQSEEDIK	35	126.128	148652	127.131	103108	500029	162728	113778	0.699196	-0.516232	-0.516232
						0	7.16207	JL121323_121323_ABP_127_30B.08160.08160.6	NP	5.32125	0.162866	0.0026	//19	19//129	3.71075	1.23529	R.DGTK[1513.78]PATTFQSEEDIKR.A	Spt15	1	TBP	DGTKPATTFQSEEDIKR	35	//12	7//54	1.6105	0.85	K.SEDDSK[2329.2]LASR.K	Spt15	1	TBP	SEDDSKLASR	133	126.128	151770	127.131	85139.6	231527	166385	93950.1	0.564655	-0.824557	-0.824557
						-2	12.5634	JL121323_121323_ABP_127_30B.09493.09493.5	P	4.9765	0.176347	0.733	//15	15//132	4.483	1.08824	R.DGTK[1513.78]PATTFQSEEDIK[425.27]R.A	Spt15	1	TBP	DGTKPATTFQSEEDIKR	35	//12	6//54	0.4935	0.4	K.SEDDSK[2626.38]LASR.K	Spt15	1	TBP	SEDDSKLASR	133	126.128	651379	127.131	570003	651379	711619	628989	0.883885	-0.178069	-0.178069
						-1	4.44942	JL121323_121323_ABP_127_50B.10078.10078.6	NP	4.8235	0.174505	0.0231	//15	14//132	3.2565	1.02941	R.DGTK[1513.78]PATTFQSEEDIK[425.27]R.A	Spt15	1	TBP	DGTKPATTFQSEEDIKR	35	1//12	9//54	1.567	1.1	K.SEDDSK[2626.38]LASR.K	Spt15	1	TBP	SEDDSKLASR	133	126.127	573308	127.131	448613	573308	626973	495037	0.789568	-0.340865	-0.340865
	32	TBP:133---TBP:47	7.98175	-0.458737	0.458737
						0	0.703076	JL121323_121323_ABP_127_1ug.08608.08608.5	N	7.98175	0.241666		1//12	10//54	2.26125	1.38889	K.SEDDSK[2329.2]LASR.K	Spt15	1	TBP	SEDDSKLASR	133	1//19	23//129	5.7205	1.6875	R.DGTKPATTFQSEEDIK[1513.78]R.A	Spt15	1	TBP	DGTKPATTFQSEEDIKR	47	126.128	344644	127.131	210331	604047	377626	232097	0.614621	-0.702232	-0.702232
						0	4.46155	JL121323_121323_ABP_127_50B.08477.08477.3	P	6.65775	0.233728	0.51	//19	19//71	5.86575	1.67647	R.DGTKPATTFQSEEDIK[1513.78]R.A	Spt15	1	TBP	DGTKPATTFQSEEDIKR	47	//12	4//34	0.792	0.6	K.SEDDSK[2329.2]LASR.K	Spt15	1	TBP	SEDDSKLASR	133	126.128	138453	127.131	81483.4	1.56967e+06	151739	89915.6	0.592567	-0.754949	-0.754949
						0	3.35437	JL121323_121323_ABP_127_30B.08188.08188.3	P	6.2445	0.223046	0.42	//19	18//71	5.852	1.47059	R.DGTKPATTFQSEEDIK[1513.78]R.A	Spt15	1	TBP	DGTKPATTFQSEEDIKR	47	//12	3//34	0.3925	0.4	K.SEDDSK[2329.2]LASR.K	Spt15	1	TBP	SEDDSKLASR	133	126.127	175683	127.131	89858.6	2516451	192706	99157.5	0.514552	-0.958611	-0.958611
						-2	0.216514	JL121323_121323_ABP_127_50B.10200.10200.6	NP	6.0655	0.209676	0.429	//14	13//134	4.57475	0.941176	R.DGTK[425.27]PATTFQSEEDIK[1513.78]R.A	Spt15	1	TBP	DGTKPATTFQSEEDIKR	47	1//12	8//54	1.49075	0.9	K.SEDDSK[2626.38]LASR.K	Spt15	1	TBP	SEDDSKLASR	133	126.128	365898	127.131	406756	406756	398685	448848	1.12582	0.17098	0.17098
						0	3.85449	JL121323_121323_ABP_127_50B.08488.08488.6	N	4.2445	0.173422		//12	6//44	1.546	0.888889	K.SEDDSK[2329.21]LASR.K	Spt15	1	TBP	SEDDSKLASR	133	1//19	10//100	2.6985	0.5625	R.DGTKPATTFQSEEDIK[1513.79]R.A	Spt15	1	TBP	DGTKPATTFQSEEDIKR	47	126.127	243856	127.131	233173	243856	266168	257302	0.966692	-0.0488718	-0.0488718
	33	TBP:133---TBP:55	19.7063	-0.33982	0.33982
						0	1.95613	JL121323_121323_ABP_127_D.27660.27660.4	P	19.7063	0.537453	0.00387	//15	52//186	18.9647	2.45161	R.AAPESEK[1513.78]DTSATSGIVPTLQNIVATVTLGC[160.03]R.L	Spt15	1	TBP	AAPESEKDTSATSGIVPTLQNIVATVTLGCR	55	//12	6//44	0.7415	0.7	K.SEDDSK[3592.89]LASR.K	Spt15	1	TBP	SEDDSKLASR	133	126.127	340950	127.131	185013	2.69096e+06	373859	204159	0.546085	-0.872803	-0.872803
						0	2.1535	JL121323_121323_ABP_127_D.27680.27680.5	P	18.9665	0.494299	0.216	//15	53//255	18.2862	2.35484	R.AAPESEK[1513.78]DTSATSGIVPTLQNIVATVTLGC[160.03]R.L	Spt15	1	TBP	AAPESEKDTSATSGIVPTLQNIVATVTLGCR	55	//12	6//54	0.68025	0.7	K.SEDDSK[3592.89]LASR.K	Spt15	1	TBP	SEDDSKLASR	133	126.127	199978	127.131	134111	1.76927e+06	218969	147989	0.675843	-0.565239	-0.565239
						-1	6.9764	JL121323_121323_ABP_127_50B.31803.31803.4	P	17.5695	0.489108	0.0442	//15	48//186	16.8263	2.14516	R.AAPESEK[1513.78]DTSATSGIVPTLQNIVATVTLGC[160.03]R.L	Spt15	1	TBP	AAPESEKDTSATSGIVPTLQNIVATVTLGCR	55	//12	5//44	0.74325	0.65	K.SEDDSK[3592.89]LASR.K	Spt15	1	TBP	SEDDSKLASR	133	126.127	122962	127.131	85802.6	657630	134599	94681.7	0.703436	-0.507508	-0.507508
						-1	1.10162	JL121323_121323_ABP_127_50B.31799.31799.4	P	17.3663	0.551739	0.019	//15	45//186	16.7333	2.03226	R.AAPESEK[1513.78]DTSATSGIVPTLQNIVATVTLGC[160.03]R.L	Spt15	1	TBP	AAPESEKDTSATSGIVPTLQNIVATVTLGCR	55	//12	5//44	0.633	0.65	K.SEDDSK[3592.89]LASR.K	Spt15	1	TBP	SEDDSKLASR	133	126.127	126067	127.13	99971.9	674648	137852	110317	0.80026	-0.321459	-0.321459
						0	2.62082	JL121323_121323_ABP_127_70B.27698.27698.5	P	17.2873	0.460729	2.08e-07	//15	47//255	16.6378	2.14516	R.AAPESEK[1513.78]DTSATSGIVPTLQNIVATVTLGC[160.03]R.L	Spt15	1	TBP	AAPESEKDTSATSGIVPTLQNIVATVTLGCR	55	//12	6//54	0.6495	0.7	K.SEDDSK[3592.89]LASR.K	Spt15	1	TBP	SEDDSKLASR	133	126.127	95076.7	127.131	69000.8	655925	104042	76141.3	0.731832	-0.450416	-0.450416
						0	-1.98555	JL121323_121323_ABP_127_30B.30573.30573.5	P	17.1593	0.450806	0.0324	//15	44//255	16.4267	2	R.AAPESEK[1513.78]DTSATSGIVPTLQNIVATVTLGC[160.03]R.L	Spt15	1	TBP	AAPESEKDTSATSGIVPTLQNIVATVTLGCR	55	//12	6//54	0.7325	0.7	K.SEDDSK[3592.89]LASR.K	Spt15	1	TBP	SEDDSKLASR	133	126.127	213716	127.131	165551	980177	233741	182683	0.781562	-0.355568	-0.355568
						-1	3.83583	JL121323_121323_ABP_127_50B.31746.31746.5	P	16.7153	0.44783	0.349	//15	41//255	15.9753	1.74194	R.AAPESEK[1513.78]DTSATSGIVPTLQNIVATVTLGC[160.03]R.L	Spt15	1	TBP	AAPESEKDTSATSGIVPTLQNIVATVTLGCR	55	//12	7//54	0.74	0.75	K.SEDDSK[3592.89]LASR.K	Spt15	1	TBP	SEDDSKLASR	133	126.127	140330	127.13	119148	435199	153352	131478	0.857361	-0.222025	-0.222025
						0	-1.996	JL121323_121323_ABP_127_30B.30588.30588.4	P	16.1528	0.477744	0.0462	//15	41//186	15.3567	1.85484	R.AAPESEK[1513.78]DTSATSGIVPTLQNIVATVTLGC[160.03]R.L	Spt15	1	TBP	AAPESEKDTSATSGIVPTLQNIVATVTLGCR	55	//12	7//44	0.796	0.75	K.SEDDSK[3592.89]LASR.K	Spt15	1	TBP	SEDDSKLASR	133	126.127	155461	127.13	104415	625861	170222	115220	0.676883	-0.563021	-0.563021
						-1	4.30605	JL121323_121323_ABP_127_30B.30567.30567.4	P	15.7127	0.437462	0.0223	//15	40//186	15.0407	1.82258	R.AAPESEK[1513.78]DTSATSGIVPTLQNIVATVTLGC[160.03]R.L	Spt15	1	TBP	AAPESEKDTSATSGIVPTLQNIVATVTLGCR	55	//12	6//44	0.672	0.7	K.SEDDSK[3592.89]LASR.K	Spt15	1	TBP	SEDDSKLASR	133	126.127	128467	127.131	99147.1	432140	140510	109407	0.778646	-0.360961	-0.360961
						-2	8.38879	JL121323_121323_ABP_127_30B.30748.30748.5	P	15.4567	0.417569	0.0557	//15	43//255	14.8705	1.72581	R.AAPESEK[1513.78]DTSATSGIVPTLQNIVATVTLGC[160.03]R.L	Spt15	1	TBP	AAPESEKDTSATSGIVPTLQNIVATVTLGCR	55	//12	7//54	0.58625	0.75	K.SEDDSK[3592.89]LASR.K	Spt15	1	TBP	SEDDSKLASR	133	126.128	145830	127.131	137338	646132	159199	151551	0.95196	-0.0710278	-0.0710278
						-2	6.01508	JL121323_121323_ABP_127_50B.31767.31767.4	P	15.3253	0.469977	0.201	//15	39//186	15.0087	1.70968	R.AAPESEK[1513.78]DTSATSGIVPTLQNIVATVTLGC[160.03]R.L	Spt15	1	TBP	AAPESEKDTSATSGIVPTLQNIVATVTLGCR	55	//12	4//44	0.3165	0.3	K.SEDDSK[3592.89]LASR.K	Spt15	1	TBP	SEDDSKLASR	133	126.128	113990	127.131	88724.7	436052	124666	97906.3	0.78535	-0.348592	-0.348592
						0	1.41916	JL121323_121323_ABP_127_70B.27644.27644.5	P	13.792	0.385596	3.08e-07	//15	37//255	13.1337	1.5	R.AAPESEK[1513.78]DTSATSGIVPTLQNIVATVTLGC[160.03]R.L	Spt15	1	TBP	AAPESEKDTSATSGIVPTLQNIVATVTLGCR	55	//12	7//54	0.65825	0.75	K.SEDDSK[3592.89]LASR.K	Spt15	1	TBP	SEDDSKLASR	133	126.127	56221.9	127.13	50566.7	117968	61404.7	55799.5	0.908718	-0.138096	-0.138096
						0	-3.81184	JL121323_121323_ABP_127_70B.27658.27658.4	P	13.3003	0.386377	0.319	//15	34//186	12.9648	1.53226	R.AAPESEK[1513.78]DTSATSGIVPTLQNIVATVTLGC[160.03]R.L	Spt15	1	TBP	AAPESEKDTSATSGIVPTLQNIVATVTLGCR	55	1//12	4//44	0.3355	0.3	K.SEDDSK[3592.89]LASR.K	Spt15	1	TBP	SEDDSKLASR	133	126.128	54995.3	127.131	46251.9	132931	60104	51038.2	0.849165	-0.235884	-0.235884
						-2	-0.821039	JL121323_121323_ABP_127_70B.27646.27646.4	P	12.6975	0.363711	0.341	//15	34//186	12.238	1.48387	R.AAPESEK[1513.78]DTSATSGIVPTLQNIVATVTLGC[160.03]R.L	Spt15	1	TBP	AAPESEKDTSATSGIVPTLQNIVATVTLGCR	55	//12	5//44	0.4595	0.5	K.SEDDSK[3592.89]LASR.K	Spt15	1	TBP	SEDDSKLASR	133	126.128	55314.6	127.131	45073.4	111834	60470.7	49737.7	0.82251	-0.281895	-0.281895
						-1	0.781176	JL121323_121323_ABP_127_70B.27810.27810.4	P	12.2242	0.353624	0.329	//15	38//186	11.8165	1.5	R.AAPESEK[1513.78]DTSATSGIVPTLQNIVATVTLGC[160.03]R.L	Spt15	1	TBP	AAPESEKDTSATSGIVPTLQNIVATVTLGCR	55	//12	4//44	0.40775	0.45	K.SEDDSK[3592.89]LASR.K	Spt15	1	TBP	SEDDSKLASR	133	126.128	58184.4	127.131	54077.8	122513	63526.9	59673.9	0.939349	-0.0902671	-0.0902671
						-1	5.69463	JL121323_121323_ABP_127_100B.23815.23815.4	P	12.2148	0.294697	0.0332	//15	34//186	11.8255	1.43548	R.AAPESEK[1513.78]DTSATSGIVPTLQNIVATVTLGC[160.03]R.L	Spt15	1	TBP	AAPESEKDTSATSGIVPTLQNIVATVTLGCR	55	//12	4//44	0.38925	0.45	K.SEDDSK[3592.89]LASR.K	Spt15	1	TBP	SEDDSKLASR	133	126.128	31153.9	127.131	29718	90741.5	34005.2	32793.3	0.96436	-0.0523561	-0.0523561
	34	TBP:133---TBP:8	4.469	-0.508314	0.508314
						1	-4.45857	JL121323_121323_ABP_127_70B.12951.12951.6	P	4.469	0.190397	0.0545	//11	16//133	3.041	1.05882	R.LK[1513.78]EFK[425.27]EANK[425.27]IVFDPNTR.Q	Spt15	1	TBP	LKEFKEANKIVFDPNTR	8	//12	6//54	1.428	0.8	K.SEDDSK[3049.72]LASR.K	Spt15	1	TBP	SEDDSKLASR	133	126.127	368924	127.131	257291	527040	403839	283916	0.703044	-0.508314	-0.508314
	35	TBP:133---TBP:83	4.0775	-0.0516791	0.0516791
						0	-0.730398	JL121323_121323_ABP_127_30B.10861.10861.4	P	4.0775	0.164412	0.0106	//13	14//52	3.23825	1.5	R.LDLK[1513.78]TVALHAR.N	Spt15	1	TBP	LDLKTVALHAR	83	//12	7//44	0.83925	0.85	K.SEDDSK[1643]LASR.K	Spt15	1	TBP	SEDDSKLASR	133	126.128	1.71064e+06	127.131	1632552	2.4884e+06	1.8672e+06	1.80149e+06	0.964813	-0.0516791	-0.0516791
	36	TBP:133---TBP:97	6.413	-0.421647	0.421647
						0	3.16376	JL121323_121323_ABP_127_1ug.06352.06352.4	N	6.413	0.226856		1//10	9//36	2.98925	1.78571	R.NAEYNPK[1513.79]R.F	Spt15	1	TBP	NAEYNPKR	97	//12	13//47	3.42375	2.05556	K.SEDDSK[1397.76]LASR.K	Spt15	1	TBP	SEDDSKLASR	133	126.128	138736	127.131	91153.1	276533	151934	100586	0.662037	-0.595017	-0.595017
						0	2.33154	JL121323_121323_ABP_127_30B.06238.06238.4	NP	6.258	0.303146	0.0617	//12	12//47	3.19525	1.65	K.SEDDSK[1397.75]LASR.K	Spt15	1	TBP	SEDDSKLASR	133	//10	8//36	3.06275	1.3125	R.NAEYNPK[1513.78]R.F	Spt15	1	TBP	NAEYNPKR	97	126.127	43131.7	127.131	35967	83634.2	47142.2	39689	0.841901	-0.248278	-0.248278
	37	TBP:138---TBP:145	7.0075	-0.40819	0.40819
						0	3.949	JL121323_121323_ABP_127_50B.16980.16980.5	P	7.0075	0.241326	0.119	//17	22//120	6.998	1.93333	R.IIQK[943.57]IGFAAK[425.27]FTDFK.I	Spt15	1	TBP	IIQKIGFAAKFTDFK	145	//5	1//23	0.0095	0.125	R.K[2430.42]YAR.I	Spt15	1	TBP	KYAR	138	126.128	604221	127.131	469730	992904	660818	518339	0.78439	-0.350357	-0.350357
						0	2.55139	JL121323_121323_ABP_127_100B.15040.15040.5	P	6.779	0.218055	0.011	//17	22//120	6.7675	1.83333	R.IIQK[943.57]IGFAAK[425.27]FTDFK.I	Spt15	1	TBP	IIQKIGFAAKFTDFK	145	//5	1//23	0.0115	0.125	R.K[2430.42]YAR.I	Spt15	1	TBP	KYAR	138	126.128	474038	127.131	289034	826762	519407	318944	0.614054	-0.703562	-0.703562
						0	1.68999	JL121323_121323_ABP_127_30B.08077.08077.3	P	6.6415	0.233954	1.39e-05	1//12	18//42	6.1815	2.7	R.IIQK[943.57]IGFAAK.F	Spt15	1	TBP	IIQKIGFAAK	145	//5	4//16	0.46	1	R.K[1494.94]YAR.I	Spt15	1	TBP	KYAR	138	126.128	2.14504e+06	127.131	1.57298e+06	21341538	2.34711e+06	1.73576e+06	0.739529	-0.435322	-0.435322
						0	4.48654	JL121323_121323_ABP_127_70B.15675.15675.5	P	6.6295	0.223077	0.000853	//17	23//120	6.6295	1.96667	R.IIQK[943.57]IGFAAK[425.27]FTDFK.I	Spt15	1	TBP	IIQKIGFAAKFTDFK	145	//5	//23	0	0	R.K[2430.42]YAR.I	Spt15	1	TBP	KYAR	138	126.128	1.4106e+06	127.131	972325	2.55218e+06	1.54423e+06	1.07294e+06	0.694807	-0.525317	-0.525317
						0	2.5559	JL121323_121323_ABP_127_30B.07898.07898.3	P	6.3415	0.183734	0.000493	1//12	16//42	5.8865	2.3	R.IIQK[943.57]IGFAAK.F	Spt15	1	TBP	IIQKIGFAAK	145	//5	4//16	0.455	1	R.K[1494.94]YAR.I	Spt15	1	TBP	KYAR	138	126.128	3267640	127.131	2.2001e+06	22174096	3.57785e+06	2.42777e+06	0.678556	-0.55946	-0.55946
						1419	-109.334	JL121323_121323_ABP_127_70B.15721.15721.3	P	5.85725	0.215249	3.18e-18	1//17	17//66	5.69425	1.43333	R.IIQK[943.57]IGFAAK[425.27]FTDFK.I	Spt15	1	TBP	IIQKIGFAAKFTDFK	145	//5	1//13	0.163	0.125	R.K[2430.42]YAR.I	Spt15	1	TBP	KYAR	138	126.128	266174	127.131	135896	266174	291970	149959	0.513612	-0.961248	-0.961248
						0	2.19615	JL121323_121323_ABP_127_D.09382.09382.4	P	4.97775	0.160775	1.7e-05	2//12	17//52	4.91125	2.05	R.IIQK[943.57]IGFAAK.F	Spt15	1	TBP	IIQKIGFAAK	145	//5	2//21	0.0665	0.5	R.K[1494.94]YAR.I	Spt15	1	TBP	KYAR	138	126.128	197644	127.131	136080	555758	216371	150163	0.694005	-0.526981	-0.526981
						0	1.20894	JL121323_121323_ABP_127_30B.09001.09001.3	P	4.9535	0.175619	0.0363	//12	15//42	4.241	2.15	R.IIQK[943.57]IGFAAK.F	Spt15	1	TBP	IIQKIGFAAK	145	//5	5//16	0.7125	1.5	R.K[1494.94]YAR.I	Spt15	1	TBP	KYAR	138	126.127	424614	127.13	379011	968411	463793	418233	0.901766	-0.149175	-0.149175
						0	0.656756	JL121323_121323_ABP_127_30B.09025.09025.4	P	4.67925	0.168883	0.0418	1//12	14//52	4.6235	1.8	R.IIQK[943.57]IGFAAK.F	Spt15	1	TBP	IIQKIGFAAK	145	//5	1//21	0.05575	0.125	R.K[1494.94]YAR.I	Spt15	1	TBP	KYAR	138	126.128	137059	127.131	112765	209957	149821	124434	0.830553	-0.267856	-0.267856
						0	4.37695	JL121323_121323_ABP_127_30B.08759.08759.4	P	4.65925	0.167211	0.0238	1//12	15//52	4.5555	1.85	R.IIQK[943.57]IGFAAK.F	Spt15	1	TBP	IIQKIGFAAK	145	//5	1//21	0.10375	0.125	R.K[1494.94]YAR.I	Spt15	1	TBP	KYAR	138	126.128	101977	127.131	95367.5	190797	111333	105237	0.945239	-0.0812483	-0.0812483
						0	1.93958	JL121323_121323_ABP_127_70B.07213.07213.4	P	4.5905	0.14402	2.71e-09	2//12	16//52	4.55375	1.9	R.IIQK[943.57]IGFAAK.F	Spt15	1	TBP	IIQKIGFAAK	145	//5	1//21	0.03675	0.125	R.K[1494.94]YAR.I	Spt15	1	TBP	KYAR	138	126.128	411356	127.131	279589	745346	450375	308522	0.685033	-0.545756	-0.545756
						0	2.77342	JL121323_121323_ABP_127_50B.08196.08196.4	P	4.5535	0.14485	0.0109	1//12	15//52	4.5225	1.85	R.IIQK[943.57]IGFAAK.F	Spt15	1	TBP	IIQKIGFAAK	145	//5	1//21	0.031	0.125	R.K[1494.94]YAR.I	Spt15	1	TBP	KYAR	138	126.128	769175	127.131	553183	1.84298e+06	841767	610428	0.725175	-0.463599	-0.463599
						0	2.64513	JL121323_121323_ABP_127_30B.08266.08266.4	P	4.35225	0.138079	0.00878	1//12	14//52	4.3245	1.65	R.IIQK[943.57]IGFAAK.F	Spt15	1	TBP	IIQKIGFAAK	145	//5	1//21	0.02775	0.125	R.K[1494.94]YAR.I	Spt15	1	TBP	KYAR	138	126.128	269140	127.131	206265	486030	294386	227610	0.773169	-0.371145	-0.371145
						0	0.849179	JL121323_121323_ABP_127_30B.09327.09327.4	P	4.30325	0.166941	0.0204	1//12	15//52	4.24925	1.85	R.IIQK[943.57]IGFAAK.F	Spt15	1	TBP	IIQKIGFAAK	145	//5	1//21	0.054	0.125	R.K[1494.94]YAR.I	Spt15	1	TBP	KYAR	138	126.128	118295	127.131	111931	132729	129133	123514	0.956485	-0.0641855	-0.0641855
						0	3.2224	JL121323_121323_ABP_127_30B.07899.07899.4	P	4.264	0.122939	0.0446	2//12	16//52	4.23775	1.85	R.IIQK[943.57]IGFAAK.F	Spt15	1	TBP	IIQKIGFAAK	145	//5	1//21	0.02625	0.125	R.K[1494.94]YAR.I	Spt15	1	TBP	KYAR	138	126.128	3.36962e+06	127.132	2.15141e+06	8466329	3.69094e+06	2.37404e+06	0.643208	-0.636644	-0.636644
						0	2.77342	JL121323_121323_ABP_127_30B.08490.08490.4	P	4.25	0.145493	0.000238	1//12	14//52	4.21325	1.65	R.IIQK[943.57]IGFAAK.F	Spt15	1	TBP	IIQKIGFAAK	145	//5	1//21	0.03675	0.125	R.K[1494.94]YAR.I	Spt15	1	TBP	KYAR	138	126.128	280666	127.131	212135	483337	307029	234087	0.762427	-0.391329	-0.391329
						0	4.50523	JL121323_121323_ABP_127_30B.08773.08773.4	P	4.21375	0.151285	0.0212	1//12	14//52	4.114	1.65	R.IIQK[943.57]IGFAAK.F	Spt15	1	TBP	IIQKIGFAAK	145	//5	1//21	0.09975	0.125	R.K[1494.94]YAR.I	Spt15	1	TBP	KYAR	138	126.128	114641	127.131	99630	216641	125251	109940	0.877757	-0.188106	-0.188106
						0	1.29817	JL121323_121323_ABP_127_30B.08078.08078.4	P	4.11825	0.128585	0.18	2//12	15//52	4.0895	1.7	R.IIQK[943.57]IGFAAK.F	Spt15	1	TBP	IIQKIGFAAK	145	//5	1//21	0.02875	0.125	R.K[1494.94]YAR.I	Spt15	1	TBP	KYAR	138	126.128	1.68331e+06	127.131	1.16308e+06	4995675	1.84275e+06	1.28344e+06	0.696478	-0.52185	-0.52185
						-2	-61.4961	JL121323_121323_ABP_127_30B.08645.08645.4	P	3.1745	0.101691	0.178	1//12	13//52	3.126	1.55	R.IIQK[943.57]IGFAAK.F	Spt15	1	TBP	IIQKIGFAAK	145	//5	1//21	0.0485	0.125	R.K[1494.94]YAR.I	Spt15	1	TBP	KYAR	138	126.128	201956	127.131	167768	201956	220742	185130	0.83867	-0.253824	-0.253824
						-2	-61.1113	JL121323_121323_ABP_127_30B.08850.08850.4	P	1.93775	0.0750819	0.356	//12	11//52	1.859	1.3	R.IIQK[943.57]IGFAAK.F	Spt15	1	TBP	IIQKIGFAAK	145	1//5	2//21	0.07875	0.25	R.K[1494.94]YAR.I	Spt15	1	TBP	KYAR	138	126.128	243736	127.131	214936	494948	266257	237179	0.89079	-0.166843	-0.166843
	38	TBP:138---TBP:15	6.1265	-0.311949	0.311949
						-1	2.12011	JL121323_121323_ABP_127_50B.10683.10683.6	P	6.1265	0.269309	0.0458	//14	19//131	5.958	1.47059	R.LKEFK[425.27]EANK[943.57]IVFDPNTR.Q	Spt15	1	TBP	LKEFKEANKIVFDPNTR	15	//5	2//23	0.1685	0.5	R.K[2752.54]YAR.I	Spt15	1	TBP	KYAR	138	126.128	284045	127.131	197636	445956	310933	218088	0.701399	-0.511693	-0.511693
						0	2.6608	JL121323_121323_ABP_127_50B.10709.10709.6	P	6.03775	0.263709	0.0144	//14	18//131	5.96325	1.44118	R.LKEFK[425.27]EANK[943.57]IVFDPNTR.Q	Spt15	1	TBP	LKEFKEANKIVFDPNTR	15	//5	1//23	0.0745	0.125	R.K[2752.54]YAR.I	Spt15	1	TBP	KYAR	138	126.128	289101	127.131	216116	441555	316286	238481	0.754005	-0.407355	-0.407355
						-2	2.34079	JL121323_121323_ABP_127_30B.09707.09707.6	P	4.6555	0.197037	0.000729	//16	19//117	4.136	1.46667	K.EFK[425.27]EANK[943.57]IVFDPNTR.Q	Spt15	1	TBP	EFKEANKIVFDPNTR	15	//5	3//23	0.5195	1	R.K[2511.36]YAR.I	Spt15	1	TBP	KYAR	138	126.127	122188	127.13	82423.1	198869	133786	90952.6	0.679837	-0.556739	-0.556739
						-2	-8.09476	JL121323_121323_ABP_127_50B.22892.22892.4	P	3.468	0.118672	0.72	//15	10//66	3.446	1.125	K.E[111.03]ANK[1425.89]IVFDPNTR.Q	Spt15	1	TBP	EANKIVFDPNTR	15	//9	2//39	0.022	0.125	R.K[1791.97]YARIIQK.I	Spt15	1	TBP	KYARIIQK	138	126.128	462789	127.131	493200	910094	504515	544238	1.07873	0.109339	0.109339
						1	14.4763	JL121323_121323_ABP_127_30B.22571.22571.4	P	2.6665	0.0858541	0.516	//15	9//66	2.64775	0.916667	K.E[111.03]ANK[1425.89]IVFDPNTR.Q	Spt15	1	TBP	EANKIVFDPNTR	15	//9	1//39	0.01875	0.0625	R.K[1791.97]YARIIQK.I	Spt15	1	TBP	KYARIIQK	138	126.127	562080	127.13	544704	840473	613419	601072	0.979873	-0.0293338	-0.0293338
						1	-10.0168	JL121323_121323_ABP_127_100B.19719.19719.3	P	2.65325	0.0853423	0.294	1//14	12//47	1.9655	1.04167	K.EANK[1370.82]IVFDPNTR.Q	Spt15	1	TBP	EANKIVFDPNTR	15	//10	6//25	0.68775	0.8125	K.LASRK[1809.98]YAR.I	Spt15	1	TBP	LASRKYAR	138	126.127	123324	127.131	115540	165500	134636	127497	0.946971	-0.0786078	-0.0786078
						0	2.07812	JL121323_121323_ABP_127_30B.09690.09690.4	P	1.5745	0.0612801	0.628	//16	12//90	1.2985	0.666667	K.EFK[425.27]EANK[943.57]IVFDPNTR.Q	Spt15	1	TBP	EFKEANKIVFDPNTR	15	//5	3//18	0.276	0.625	R.K[2511.36]YAR.I	Spt15	1	TBP	KYAR	138	126.127	1.25428e+06	127.131	761780	2733247	1.37436e+06	840612	0.611637	-0.709252	-0.709252
	39	TBP:138---TBP:35	16.004	-0.631603	0.631603
						0	2.65927	JL121323_121323_ABP_127_30B.06786.06786.4	P	16.004	0.463555	0.0022	//19	41//105	15.974	4.05882	R.DGTK[943.57]PATTFQSEEDIKR.A	Spt15	1	TBP	DGTKPATTFQSEEDIKR	35	//5	2//18	0.03	0.25	R.K[2329.2]YAR.I	Spt15	1	TBP	KYAR	138	126.128	283732	127.131	140170	1.93173e+06	311286	154675	0.496891	-1.009	-1.009
						0	2.39171	JL121323_121323_ABP_127_50B.06846.06846.4	P	14.0318	0.457649	0.0131	//19	34//105	13.9875	3.08824	R.DGTK[943.57]PATTFQSEEDIKR.A	Spt15	1	TBP	DGTKPATTFQSEEDIKR	35	//5	1//18	0.04425	0.125	R.K[2329.2]YAR.I	Spt15	1	TBP	KYAR	138	126.128	259758	127.131	209126	1.18496e+06	284001	230767	0.812557	-0.29946	-0.29946
						0	2.26686	JL121323_121323_ABP_127_30B.07442.07442.4	P	11.495	0.37273	0.00304	//18	31//96	11.495	2.75	R.DGTK[943.57]PATTFQSEEDIK.R	Spt15	1	TBP	DGTKPATTFQSEEDIK	35	//5	//18	0	0	R.K[2173.1]YAR.I	Spt15	1	TBP	KYAR	138	126.128	138835	127.131	98289.1	199613	151957	108460	0.713758	-0.486492	-0.486492
						0	3.27872	JL121323_121323_ABP_127_30B.07426.07426.5	P	10.5585	0.418797	7.83e-07	//19	30//134	10.1768	2.52941	R.DGTK[943.57]PATTFQSEEDIKR.A	Spt15	1	TBP	DGTKPATTFQSEEDIKR	35	//5	3//23	0.38175	0.625	R.K[2329.2]YAR.I	Spt15	1	TBP	KYAR	138	126.128	103510	127.131	68387.3	166377	113352	75464.3	0.66575	-0.586947	-0.586947
						0	1.30402	JL121323_121323_ABP_127_30B.06796.06796.3	P	10.467	0.397728	0.038	//19	30//76	10.1075	2.70588	R.DGTK[943.57]PATTFQSEEDIKR.A	Spt15	1	TBP	DGTKPATTFQSEEDIKR	35	1//5	4//13	0.3595	0.75	R.K[2329.2]YAR.I	Spt15	1	TBP	KYAR	138	126.128	462863	127.131	205530	4.03913e+06	508094	226799	0.446371	-1.16368	-1.16368
						0	3.27872	JL121323_121323_ABP_127_30B.06950.06950.5	P	9.778	0.422906	1.66e-05	//19	31//134	9.5505	2.70588	R.DGTK[943.57]PATTFQSEEDIKR.A	Spt15	1	TBP	DGTKPATTFQSEEDIKR	35	//5	2//23	0.2275	0.5	R.K[2329.2]YAR.I	Spt15	1	TBP	KYAR	138	126.127	168798	127.13	95135	540656	185048	104980	0.567312	-0.817785	-0.817785
						0	4.95097	JL121323_121323_ABP_127_30B.06795.06795.5	P	9.5545	0.354297	0.000299	//19	31//134	9.5185	2.67647	R.DGTK[943.57]PATTFQSEEDIKR.A	Spt15	1	TBP	DGTKPATTFQSEEDIKR	35	//5	1//23	0.036	0.125	R.K[2329.2]YAR.I	Spt15	1	TBP	KYAR	138	126.128	784656	127.131	378842	1.99838e+06	860963	418046	0.485556	-1.04229	-1.04229
						0	3.83614	JL121323_121323_ABP_127_1ug.07014.07014.5	P	9.50375	0.375598	0.0223	//19	30//134	9.4655	2.58824	R.DGTK[943.57]PATTFQSEEDIKR.A	Spt15	1	TBP	DGTKPATTFQSEEDIKR	35	//5	1//23	0.03825	0.125	R.K[2329.2]YAR.I	Spt15	1	TBP	KYAR	138	126.128	141527	127.131	78040.4	342753	155172	86116.3	0.554973	-0.849512	-0.849512
						0	2.94427	JL121323_121323_ABP_127_70B.06504.06504.5	P	9.48675	0.401998	1.01e-06	//19	29//134	9.31575	2.55882	R.DGTK[943.57]PATTFQSEEDIKR.A	Spt15	1	TBP	DGTKPATTFQSEEDIKR	35	//5	2//23	0.171	0.5	R.K[2329.2]YAR.I	Spt15	1	TBP	KYAR	138	126.128	146103	127.131	99800.8	201008	159956	110129	0.688493	-0.538486	-0.538486
						0	3.72466	JL121323_121323_ABP_127_70B.06500.06500.5	P	9.4015	0.417965	2.09e-19	//19	28//134	9.23	2.47059	R.DGTK[943.57]PATTFQSEEDIKR.A	Spt15	1	TBP	DGTKPATTFQSEEDIKR	35	//5	2//23	0.1715	0.5	R.K[2329.2]YAR.I	Spt15	1	TBP	KYAR	138	126.127	169748	127.131	117884	252392	185819	130083	0.70005	-0.514469	-0.514469
						0	2.83279	JL121323_121323_ABP_127_50B.06839.06839.5	P	9.23075	0.398995	0.0177	//19	30//134	9.204	2.58824	R.DGTK[943.57]PATTFQSEEDIKR.A	Spt15	1	TBP	DGTKPATTFQSEEDIKR	35	//5	1//23	0.02675	0.125	R.K[2329.2]YAR.I	Spt15	1	TBP	KYAR	138	126.128	302949	127.132	217217	573699	331548	239696	0.722958	-0.468016	-0.468016
						0	-2.96434	JL121323_121323_ABP_127_30B.07761.07761.5	P	9.1205	0.374366	3.74e-07	//19	27//134	8.76525	2.38235	R.DGTK[943.57]PATTFQSEEDIKR.A	Spt15	1	TBP	DGTKPATTFQSEEDIKR	35	//5	3//23	0.35525	0.625	R.K[2329.2]YAR.I	Spt15	1	TBP	KYAR	138	126.127	84417.2	127.131	69676.5	111712	92275.1	76886.9	0.833235	-0.263205	-0.263205
						0	1.16054	JL121323_121323_ABP_127_30B.08017.08017.5	P	8.9965	0.345415	4.14e-06	//19	27//134	8.7305	2.35294	R.DGTK[943.57]PATTFQSEEDIKR.A	Spt15	1	TBP	DGTKPATTFQSEEDIKR	35	//5	2//23	0.266	0.5	R.K[2329.2]YAR.I	Spt15	1	TBP	KYAR	138	126.128	109253	127.131	82387.1	109253	119518	90912.8	0.760663	-0.394671	-0.394671
						0	2.49834	JL121323_121323_ABP_127_30B.07263.07263.5	P	8.93125	0.320392	8.69e-05	//19	28//134	8.5645	2.38235	R.DGTK[943.57]PATTFQSEEDIKR.A	Spt15	1	TBP	DGTKPATTFQSEEDIKR	35	//5	3//23	0.36675	0.625	R.K[2329.2]YAR.I	Spt15	1	TBP	KYAR	138	126.128	102164	127.131	76308.3	120335	111771	84204.9	0.753369	-0.408572	-0.408572
						0	2.76105	JL121323_121323_ABP_127_30B.06812.06812.6	P	8.61375	0.311235	2.89e-07	//19	28//134	8.5175	2.20588	R.DGTK[943.57]PATTFQSEEDIKR.A	Spt15	1	TBP	DGTKPATTFQSEEDIKR	35	//5	1//23	0.09625	0.125	R.K[2329.2]YAR.I	Spt15	1	TBP	KYAR	138	126.128	186801	127.131	90865	349247	204959	100268	0.48921	-1.03148	-1.03148
						0	3.24146	JL121323_121323_ABP_127_30B.07445.07445.3	P	8.43	0.324362	0.109	//18	18//71	8.2845	1.8125	R.DGTK[943.57]PATTFQSEEDIK.R	Spt15	1	TBP	DGTKPATTFQSEEDIK	35	//5	2//13	0.1455	0.5	R.K[2173.1]YAR.I	Spt15	1	TBP	KYAR	138	126.127	97234.8	127.131	63307.2	801513	106492	69858.4	0.655998	-0.608237	-0.608237
						0	7.02942	JL121323_121323_ABP_127_30B.08228.08228.4	P	8.14025	0.254968	0.257	//19	26//105	7.938	2.08824	R.DGTK[943.57]PATTFQSEEDIKR.A	Spt15	1	TBP	DGTKPATTFQSEEDIKR	35	//5	4//18	0.20225	0.75	R.K[2329.2]YAR.I	Spt15	1	TBP	KYAR	138	126.127	116486	127.131	107027	148698	127197	118102	0.928502	-0.107024	-0.107024
						0	0.157189	JL121323_121323_ABP_127_30B.07945.07945.5	P	8.133	0.308448	9.94e-06	//19	25//134	7.47	1.97059	R.DGTK[943.57]PATTFQSEEDIKR.A	Spt15	1	TBP	DGTKPATTFQSEEDIKR	35	//5	4//23	0.663	1.125	R.K[2329.2]YAR.I	Spt15	1	TBP	KYAR	138	126.127	95548	127.131	74946.8	95548	104490	82702.6	0.79149	-0.337357	-0.337357
						0	3.51396	JL121323_121323_ABP_127_30B.08008.08008.5	P	7.936	0.279309	0.0317	//15	24//137	7.802	2	R.DGTK[943.57]PATTFQSEEDIK[425.27]R.A	Spt15	1	TBP	DGTKPATTFQSEEDIKR	35	//5	2//23	0.134	0.5	R.K[2626.38]YAR.I	Spt15	1	TBP	KYAR	138	126.127	377230	127.131	206251	451661	413622	227595	0.550248	-0.861845	-0.861845
						0	1.85659	JL121323_121323_ABP_127_30B.07100.07100.4	P	7.7815	0.276297	0.0136	//19	33//105	7.382	2.76471	R.DGTK[943.57]PATTFQSEEDIKR.A	Spt15	1	TBP	DGTKPATTFQSEEDIKR	35	//5	4//18	0.3995	1	R.K[2329.2]YAR.I	Spt15	1	TBP	KYAR	138	126.128	537479	127.131	271234	3.95641e+06	589606	299302	0.507631	-0.978148	-0.978148
						0	4.08625	JL121323_121323_ABP_127_30B.08037.08037.4	P	7.49425	0.223203	0.132	//19	21//105	7.15275	1.58824	R.DGTK[943.57]PATTFQSEEDIKR.A	Spt15	1	TBP	DGTKPATTFQSEEDIKR	35	//5	3//18	0.3415	0.625	R.K[2329.2]YAR.I	Spt15	1	TBP	KYAR	138	126.127	121430	127.13	105157	285227	132673	116039	0.874626	-0.193261	-0.193261
						-3	2.45375	JL121323_121323_ABP_127_50B.07070.07070.5	P	6.97375	0.346789	0.174	//19	26//134	6.91975	1.91176	R.DGTK[943.57]PATTFQSEEDIKR.A	Spt15	1	TBP	DGTKPATTFQSEEDIKR	35	//5	1//23	0.054	0.125	R.K[2329.2]YAR.I	Spt15	1	TBP	KYAR	138	126.127	145626	127.131	164495	164495	158643	181518	1.14419	0.194325	0.194325
						0	2.38686	JL121323_121323_ABP_127_30B.07101.07101.5	P	6.8215	0.240834	0.000218	//19	26//134	6.3765	2.05882	R.DGTK[943.57]PATTFQSEEDIKR.A	Spt15	1	TBP	DGTKPATTFQSEEDIKR	35	1//5	4//23	0.445	0.75	R.K[2329.2]YAR.I	Spt15	1	TBP	KYAR	138	126.128	508916	127.131	250760	1.15675e+06	558346	276709	0.495587	-1.01279	-1.01279
						0	6.53094	JL121323_121323_ABP_127_50B.08297.08297.5	P	6.35975	0.233206	0.752	//15	20//137	6.11075	1.47059	R.DGTK[943.57]PATTFQSEEDIK[425.27]R.A	Spt15	1	TBP	DGTKPATTFQSEEDIKR	35	//5	2//23	0.249	0.5	R.K[2626.38]YAR.I	Spt15	1	TBP	KYAR	138	126.127	608539	127.131	520950	608539	664958	574860	0.864505	-0.210054	-0.210054
						0	-1.33769	JL121323_121323_ABP_127_30B.08085.08085.6	P	5.842	0.209357	6.57e-05	//15	18//137	5.73825	1.32353	R.DGTK[943.57]PATTFQSEEDIK[425.27]R.A	Spt15	1	TBP	DGTKPATTFQSEEDIKR	35	//5	2//23	0.10375	0.25	R.K[2626.38]YAR.I	Spt15	1	TBP	KYAR	138	126.128	294410	127.131	166664	557067	322743	183911	0.569836	-0.811381	-0.811381
						0	2.41212	JL121323_121323_ABP_127_30B.08031.08031.4	P	5.03825	0.188047	0.0441	//15	17//106	4.79725	1	R.DGTK[943.57]PATTFQSEEDIK[425.27]R.A	Spt15	1	TBP	DGTKPATTFQSEEDIKR	35	//5	3//18	0.241	0.625	R.K[2626.38]YAR.I	Spt15	1	TBP	KYAR	138	126.128	1.32203e+06	127.131	590135	9926514	1.45118e+06	651205	0.448741	-1.15605	-1.15605
						1015	-114.807	JL121323_121323_ABP_127_30B.08121.08121.4	P	3.72875	0.143311	0.0656	//15	14//106	3.44125	1.14706	R.DGTK[943.57]PATTFQSEEDIK[425.27]R.A	Spt15	1	TBP	DGTKPATTFQSEEDIKR	35	//5	2//18	0.2875	0.5	R.K[2626.38]YAR.I	Spt15	1	TBP	KYAR	138	126.128	605103	127.131	465832	3.07829e+06	661837	514038	0.776684	-0.3646	-0.3646
						0	3.67049	JL121323_121323_ABP_127_50B.08471.08471.6	NP	2.98525	0.0934746	0.724	//15	13//137	1.98475	0.647059	R.DGTK[943.57]PATTFQSEEDIK[425.27]R.A	Spt15	1	TBP	DGTKPATTFQSEEDIKR	35	//5	4//23	1.0005	1.125	R.K[2626.38]YAR.I	Spt15	1	TBP	KYAR	138	126.127	263040	127.131	179832	263040	287978	198441	0.689084	-0.537248	-0.537248
						-1	4.03307	JL121323_121323_ABP_127_30B.08147.08147.7	P	2.34525	0.0838608	0.168	//19	11//126	1.144	0.588235	R.DGTK[2329.26]PATTFQSEEDIKR.A	Spt15	1	TBP	DGTKPATTFQSEEDIKR	35	//16	6//104	1.20125	0.464286	K.SEDDSK[425.27]LASRK[2329.2]YAR.I	Spt15	1	TBP	SEDDSKLASRKYAR	138	126.128	162899	127.131	86432.4	166559	178647	95376.7	0.533885	-0.9054	-0.9054
						0	2.52637	JL121323_121323_ABP_127_30B.08240.08240.6	P	2.09575	0.0717907	0.657	//19	11//126	0.946	0.676471	R.DGTK[2329.26]PATTFQSEEDIKR.A	Spt15	1	TBP	DGTKPATTFQSEEDIKR	35	//16	8//104	1.14975	0.607143	K.SEDDSK[425.27]LASRK[2329.2]YAR.I	Spt15	1	TBP	SEDDSKLASRKYAR	138	126.127	282156	127.131	138780	756166	309564	153142	0.494701	-1.01537	-1.01537
						0	1.89148	JL121323_121323_ABP_127_30B.07121.07121.6	P	1.7885	0.0642583	0.00273	1//19	15//134	1.13725	0.647059	R.DGTK[943.57]PATTFQSEEDIKR.A	Spt15	1	TBP	DGTKPATTFQSEEDIKR	35	//5	4//23	0.65125	0.75	R.K[2329.2]YAR.I	Spt15	1	TBP	KYAR	138	126.128	122198	127.131	64794.4	159941	134011	71499.5	0.533535	-0.906344	-0.906344
						0	-0.315852	JL121323_121323_ABP_127_30B.08305.08305.6	P	1.557	0.0499415	0.779	//19	11//126	0.89975	0.588235	R.DGTK[2329.26]PATTFQSEEDIKR.A	Spt15	1	TBP	DGTKPATTFQSEEDIKR	35	//16	7//104	0.65725	0.392857	K.SEDDSK[425.27]LASRK[2329.2]YAR.I	Spt15	1	TBP	SEDDSKLASRKYAR	138	126.127	173745	127.131	119669	375596	190206	132053	0.694263	-0.526446	-0.526446
	40	TBP:138---TBP:47	8.45525	-0.785044	0.785044
						0	1.61895	JL121323_121323_ABP_127_30B.08294.08294.6	P	8.45525	0.275415	0.0393	1//14	22//137	7.866	1.67647	R.DGTK[425.27]PATTFQSEEDIK[943.57]R.A	Spt15	1	TBP	DGTKPATTFQSEEDIKR	47	//5	3//23	0.58925	0.625	R.K[2626.38]YAR.I	Spt15	1	TBP	KYAR	138	126.128	518941	127.131	248000	818982	569438	273664	0.480587	-1.05713	-1.05713
						0	2.30717	JL121323_121323_ABP_127_30B.08187.08187.5	P	8.23125	0.289242	0.681	2//14	30//137	8.18375	2.20588	R.DGTK[425.27]PATTFQSEEDIK[943.57]R.A	Spt15	1	TBP	DGTKPATTFQSEEDIKR	47	//5	1//23	0.0475	0.125	R.K[2626.38]YAR.I	Spt15	1	TBP	KYAR	138	126.127	2.25701e+06	127.131	1.02035e+06	7406639	2.47734e+06	1.12594e+06	0.454494	-1.13767	-1.13767
						0	-0.100666	JL121323_121323_ABP_127_30B.07102.07102.3	P	6.92225	0.268872	0.0593	1//19	23//76	6.8045	1.97059	R.DGTKPATTFQSEEDIK[943.57]R.A	Spt15	1	TBP	DGTKPATTFQSEEDIKR	47	//5	2//13	0.11775	0.25	R.K[2329.2]YAR.I	Spt15	1	TBP	KYAR	138	126.128	156856	127.131	79048.6	1.86275e+06	172069	87228.9	0.50694	-0.980112	-0.980112
						0	1.82944	JL121323_121323_ABP_127_70B.06757.06757.5	P	6.4235	0.255565	0.000349	1//19	20//132	5.827	1.52941	R.DGTKPATTFQSEEDIK[943.57]R.A	Spt15	1	TBP	DGTKPATTFQSEEDIKR	47	//5	4//23	0.5965	0.75	R.K[2329.2]YAR.I	Spt15	1	TBP	KYAR	138	126.128	99159.5	127.131	83455.9	99159.5	108370	92092.2	0.849793	-0.234816	-0.234816
						0	2.17514	JL121323_121323_ABP_127_30B.08215.08215.3	P	5.85975	0.232992	0.801	//14	16//75	5.28925	1	R.DGTK[425.27]PATTFQSEEDIK[943.57]R.A	Spt15	1	TBP	DGTKPATTFQSEEDIKR	47	//5	3//13	0.5705	1	R.K[2626.38]YAR.I	Spt15	1	TBP	KYAR	138	126.128	420676	127.131	198454	3.15881e+06	461643	218991	0.474373	-1.07591	-1.07591
						0	0.422827	JL121323_121323_ABP_127_30B.07205.07205.5	P	3.69175	0.145482	0.0106	1//15	11//91	2.704	1.03846	K.PATTFQSEEDIK[943.57]R.A	Spt15	1	TBP	PATTFQSEEDIKR	47	1//5	4//24	0.98775	1.125	R.K[1928.01]YAR.I	Spt15	1	TBP	KYAR	138	126.127	56973.1	127.131	48287	56973.1	62261.1	53283.9	0.855814	-0.224631	-0.224631
	41	TBP:138---TBP:55	17.272	-0.290801	0.290801
						-2	4.7169	JL121323_121323_ABP_127_30B.29277.29277.4	P	17.272	0.555459	0.159	//15	44//191	17.2207	1.93548	R.AAPESEK[943.57]DTSATSGIVPTLQNIVATVTLGC[160.03]R.L	Spt15	1	TBP	AAPESEKDTSATSGIVPTLQNIVATVTLGCR	55	//5	1//18	0.05125	0.125	R.K[3592.89]YAR.I	Spt15	1	TBP	KYAR	138	126.128	368339	127.131	339022	834607	402200	374106	0.930147	-0.104469	-0.104469
						0	1.69317	JL121323_121323_ABP_127_50B.30773.30773.5	P	15.9495	0.532413	0.262	//15	52//260	15.7315	2.32258	R.AAPESEK[943.57]DTSATSGIVPTLQNIVATVTLGC[160.03]R.L	Spt15	1	TBP	AAPESEKDTSATSGIVPTLQNIVATVTLGCR	55	//5	2//23	0.218	0.5	R.K[3592.89]YAR.I	Spt15	1	TBP	KYAR	138	126.128	233040	127.131	187418	1.34929e+06	254792	206813	0.811693	-0.300994	-0.300994
						-2	3.55423	JL121323_121323_ABP_127_D.26818.26818.5	P	13.7082	0.429881	0.106	//15	48//260	13.6245	1.95161	R.AAPESEK[943.57]DTSATSGIVPTLQNIVATVTLGC[160.03]R.L	Spt15	1	TBP	AAPESEKDTSATSGIVPTLQNIVATVTLGCR	55	//5	2//23	0.08375	0.25	R.K[3592.89]YAR.I	Spt15	1	TBP	KYAR	138	126.127	92362.1	127.131	66273.4	309370	101081	73131.6	0.723497	-0.466941	-0.466941
	42	TBP:138---TBP:8	8.83675	-0.40073	0.40073
						0	1.77305	JL121323_121323_ABP_127_70B.11377.11377.6	P	8.83675	0.403929	0.404	//11	29//132	8.6965	2.52941	R.LK[943.57]EFK[425.27]EANK[425.27]IVFDPNTR.Q	Spt15	1	TBP	LKEFKEANKIVFDPNTR	8	//5	2//23	0.14025	0.25	R.K[3049.72]YAR.I	Spt15	1	TBP	KYAR	138	126.128	217006	127.131	138665	447645	237697	153015	0.643739	-0.635453	-0.635453
						0	5.95219	JL121323_121323_ABP_127_30B.06510.06510.4	P	2.7235	0.150707	0.209	//9	11//49	2.3965	1.61111	R.LK[943.57]EFK[425.27]EANK.I	Spt15	1	TBP	LKEFKEANK	8	//5	3//20	0.327	0.625	R.K[1810.05]YAR.I	Spt15	1	TBP	KYAR	138	126.127	57207.3	127.13	41884.4	144875	62597.3	46218.7	0.738351	-0.437622	-0.437622
						0	2.84771	JL121323_121323_ABP_127_30B.05729.05729.3	P	2.47925	0.157233	0.02	//5	6//17	2.1715	1.6	R.LK[943.57]EFK.E	Spt15	1	TBP	LKEFK	8	//5	3//16	0.30775	0.625	R.K[1070.66]YAR.I	Spt15	1	TBP	KYAR	138	126.127	63878.4	127.131	50882.5	99653	69846.9	56148.1	0.803873	-0.314961	-0.314961
						0	2.49309	JL121323_121323_ABP_127_30B.06553.06553.5	P	1.3715	0.0669416	0.000164	//9	8//58	0.704	0.722222	R.LK[943.57]EFK[425.27]EANK.I	Spt15	1	TBP	LKEFKEANK	8	//5	3//25	0.6675	1	R.K[1810.05]YAR.I	Spt15	1	TBP	KYAR	138	126.127	57270.5	127.131	48865	60950	62582.1	53921.8	0.861616	-0.214883	-0.214883
	43	TBP:138---TBP:83	7.561	-0.346429	0.346429
						0	-0.852968	JL121323_121323_ABP_127_50B.09894.09894.4	P	7.561	0.304977	0.0552	1//13	21//59	7.36	2.63636	R.LDLK[943.57]TVALHAR.N	Spt15	1	TBP	LDLKTVALHAR	83	//5	2//21	0.201	0.5	R.K[1643]YAR.I	Spt15	1	TBP	KYAR	138	126.128	331054	127.131	288470	1106349	361685	318322	0.88011	-0.184245	-0.184245
						0	-0.0198078	JL121323_121323_ABP_127_50B.10189.10189.4	P	7.314	0.279123	0.0126	//13	20//59	7.1945	2.5	R.LDLK[943.57]TVALHAR.N	Spt15	1	TBP	LDLKTVALHAR	83	//5	1//21	0.1195	0.125	R.K[1643]YAR.I	Spt15	1	TBP	KYAR	138	126.128	733214	127.131	596098	3.78064e+06	801575	657785	0.820615	-0.285223	-0.285223
						0	-0.39823	JL121323_121323_ABP_127_50B.09913.09913.5	P	4.6675	0.180143	0.0995	1//13	20//71	4.44	1.95455	R.LDLK[943.57]TVALHAR.N	Spt15	1	TBP	LDLKTVALHAR	83	//5	2//26	0.2275	0.5	R.K[1643]YAR.I	Spt15	1	TBP	KYAR	138	126.128	360234	127.131	257052	930569	394256	283653	0.719463	-0.475007	-0.475007
						0	1.01517	JL121323_121323_ABP_127_50B.10209.10209.5	P	4.655	0.170725	0.0634	1//13	18//71	4.423	1.77273	R.LDLK[943.57]TVALHAR.N	Spt15	1	TBP	LDLKTVALHAR	83	//5	2//26	0.232	0.5	R.K[1643]YAR.I	Spt15	1	TBP	KYAR	138	126.128	445175	127.131	325126	1.14023e+06	487128	358771	0.736501	-0.44124	-0.44124
	44	TBP:138---TBP:97	3.24475	-0.465586	0.465586
						0	2.28039	JL121323_121323_ABP_127_30B.05011.05011.4	P	3.24475	0.206573	0.0339	1//10	9//38	2.84025	1.375	R.NAEYNPK[943.57]R.F	Spt15	1	TBP	NAEYNPKR	97	//5	3//21	0.4045	1	R.K[1397.75]YAR.I	Spt15	1	TBP	KYAR	138	126.128	84534.7	127.131	60713.4	123442	92513.7	66996.3	0.724177	-0.465586	-0.465586
	45	TBP:145---TBP:15	4.637	-0.305012	0.305012
						0	6.86232	JL121323_121323_ABP_127_30B.26826.26826.4	P	4.637	0.185811	0.791	//14	15//61	4.59675	1.70833	K.EANK[1494.94]IVFDPNTR.Q	Spt15	1	TBP	EANKIVFDPNTR	15	//12	3//44	0.04025	0.15	R.IIQK[1809.98]IGFAAK.F	Spt15	1	TBP	IIQKIGFAAK	145	126.128	288208	127.131	216816	564623	315292	239253	0.758828	-0.398155	-0.398155
						-1	4.97224	JL121323_121323_ABP_127_50B.20422.20422.6	P	3.90125	0.143328	0.204	//18	8//114	2.151	0.833333	K.E[111.03]FKEANK[2013.23]IVFDPNTR.Q	Spt15	1	TBP	EFKEANKIVFDPNTR	15	//16	8//96	1.75025	0.535714	R.KYARIIQK[2196.18]IGFAAK.F	Spt15	1	TBP	KYARIIQKIGFAAK	145	126.128	166098	127.131	142014	367005	181500	156710	0.863418	-0.211869	-0.211869
	46	TBP:145---TBP:35	6.823	-0.189124	0.189124
						0	-3.72881	JL121323_121323_ABP_127_30B.10338.10338.5	NP	6.823	0.243787	0.000154	//19	21//129	5.259	1.55882	R.DGTK[1494.94]PATTFQSEEDIKR.A	Spt15	1	TBP	DGTKPATTFQSEEDIKR	35	//12	8//54	1.564	1.2	R.IIQK[2329.2]IGFAAK.F	Spt15	1	TBP	IIQKIGFAAK	145	126.128	726603	127.131	691552	726603	793122	763116	0.962168	-0.0556396	-0.0556396
						-3	12.1758	JL121323_121323_ABP_127_50B.23844.23844.7	P	2.053	0.0815897	0.773	//12	17//208	1.99975	0.78	R.Q[111.03]VWENQNRDGTK[2013.23]PATTFQSEEDIKR.A	Spt15	1	TBP	QVWENQNRDGTKPATTFQSEEDIKR	35	//16	2//96	0.05325	0.0714286	R.KYARIIQK[3366.67]IGFAAK.F	Spt15	1	TBP	KYARIIQKIGFAAK	145	126.128	223803	127.131	177336	368209	244725	195688	0.799623	-0.322608	-0.322608
	47	TBP:145---TBP:97	7.3515	-0.099932	0.099932
						0	2.29714	JL121323_121323_ABP_127_30B.08837.08837.3	P	7.3515	0.277342	0.622	//12	15//37	6.9955	2.25	R.IIQK[1397.75]IGFAAK.F	Spt15	1	TBP	IIQKIGFAAK	145	//10	4//28	0.356	0.375	R.NAEYNPK[1494.94]R.F	Spt15	1	TBP	NAEYNPKR	97	126.128	403962	127.131	351632	1.95189e+06	441343	388020	0.879179	-0.185771	-0.185771
						0	5.37261	JL121323_121323_ABP_127_30B.08849.08849.4	NP	5.7605	0.18305	0.00178	//12	12//47	3.7075	1.5	R.IIQK[1397.75]IGFAAK.F	Spt15	1	TBP	IIQKIGFAAK	145	1//10	6//36	2.053	0.8125	R.NAEYNPK[1494.94]R.F	Spt15	1	TBP	NAEYNPKR	97	126.128	358798	127.131	324038	501661	391857	357571	0.912502	-0.1321	-0.1321
						0	2.99789	JL121323_121323_ABP_127_30B.08865.08865.5	P	2.8175	0.0826768	0.0555	//12	8//57	2.549	1.05	R.IIQK[1397.75]IGFAAK.F	Spt15	1	TBP	IIQKIGFAAK	145	//10	2//44	0.2685	0.25	R.NAEYNPK[1494.94]R.F	Spt15	1	TBP	NAEYNPKR	97	126.128	110295	127.131	110417	142859	120327	121844	1.01261	0.0180752	0.0180752
	48	TBP:15---TBP:15	9.25875	-0.317284	0.317284
						-1	-3.52941	JL121323_121323_ABP_127_30B.13277.13277.5	P	9.25875	0.258473	0.263	//18	15//128	5.40475	1.23529	R.LKEFKEANK[1791.97]IVFDPNTR.Q	Spt15	1	TBP	LKEFKEANKIVFDPNTR	15	//15	11//79	3.854	1.29167	K.E[111.03]ANK[2455.37]IVFDPNTR.Q	Spt15	1	TBP	EANKIVFDPNTR	15	126.127	2.51168e+06	127.131	1.39728e+06	4.63269e+06	2.7537e+06	1.54188e+06	0.559931	-0.83668	-0.83668
						0	-3.26694	JL121323_121323_ABP_127_30B.17963.17963.5	NP	8.0345	0.259173	0.639	1//16	18//121	4.097	1.3	K.E[111.03]FK[425.27]EANK[1791.97]IVFDPNTR.Q	Spt15	1	TBP	EFKEANKIVFDPNTR	15	1//15	15//79	3.9375	1.5	K.E[111.03]ANK[2493.35]IVFDPNTR.Q	Spt15	1	TBP	EANKIVFDPNTR	15	126.128	967204	127.131	722064	1.46929e+06	1.05816e+06	796786	0.75299	-0.409297	-0.409297
						-1	13.4424	JL121323_121323_ABP_127_30B.19938.19938.5	N	7.121	0.256853		1//14	12//74	3.5605	1.31818	K.EANK[1810.02]IVFDPNTR.Q	Spt15	1	TBP	EANKIVFDPNTR	15	1//14	12//74	3.5605	1.31818	K.EANK[1810.02]IVFDPNTR.Q	Spt15	1	TBP	EANKIVFDPNTR	15	126.128	232319	127.132	211674	478700	253702	233578	0.92068	-0.119229	-0.119229
						0	12.3902	JL121323_121323_ABP_127_30B.17992.17992.4	N	7.10875	0.253477		1//13	8//53	3.49675	1	K.E[111.03]ANK[2493.4]IVFDPNTR.Q	Spt15	1	TBP	EANKIVFDPNTR	15	2//15	11//83	3.612	0.884615	K.E[111.03]FK[425.27]EANK[1792.02]IVFDPNTR.Q	Spt15	1	TBP	EFKEANKIVFDPNTR	15	126.128	853285	127.131	673990	1.12937e+06	933081	743737	0.797076	-0.32721	-0.32721
						-3	3.49159	JL121323_121323_ABP_127_1ug.21130.21130.3	N	6.945	0.195794		//13	7//41	3.4725	1	K.E[111.03]ANK[1809.99]IVFDPNTR.Q	Spt15	1	TBP	EANKIVFDPNTR	15	//14	7//44	3.4725	0.909091	K.EANK[1791.98]IVFDPNTR.Q	Spt15	1	TBP	EANKIVFDPNTR	15	126.128	55240.6	127.131	56348	79109	60252	62179.1	1.03198	0.0454202	0.0454202
						-1	2.07739	JL121323_121323_ABP_127_30B.17289.17289.3	N	6.805	0.210766		//14	7//44	3.4025	0.909091	K.EANK[1809.99]IVFDPNTR.Q	Spt15	1	TBP	EANKIVFDPNTR	15	//14	7//44	3.4025	0.909091	K.EANK[1809.99]IVFDPNTR.Q	Spt15	1	TBP	EANKIVFDPNTR	15	126.127	448884	127.131	365228	448884	490733	403023	0.821268	-0.284074	-0.284074
						-1	19.956	JL121323_121323_ABP_127_1ug.17791.17791.3	N	6.80375	0.233129		1//13	9//41	3.305	1.1	K.E[111.03]ANK[1809.92]IVFDPNTR.Q	Spt15	1	TBP	EANKIVFDPNTR	15	1//14	9//44	3.49875	1	K.EANK[1791.91]IVFDPNTR.Q	Spt15	1	TBP	EANKIVFDPNTR	15	126.127	99939.9	127.131	82891.8	117899	109238	91469.7	0.837345	-0.256107	-0.256107
						-1	4.11967	JL121323_121323_ABP_127_30B.18254.18254.5	N	6.7745	0.232453		//13	8//65	3.0925	1.25	K.E[111.03]ANK[2493.34]IVFDPNTR.Q	Spt15	1	TBP	EANKIVFDPNTR	15	//13	11//108	3.682	1.26923	K.E[111.03]FK[1791.96]EANK[425.27]IVFDPNTR.Q	Spt15	1	TBP	EFKEANKIVFDPNTR	15	126.128	860306	127.131	752636	1150402	939870	830521	0.883656	-0.178444	-0.178444
						-1	5.39613	JL121323_121323_ABP_127_50B.17353.17353.5	N	6.598	0.282648		//13	7//65	3.299	1.2	K.E[111.03]ANK[1791.99]IVFDPNTR.Q	Spt15	1	TBP	EANKIVFDPNTR	15	//13	7//65	3.299	1.2	K.E[111.03]ANK[1791.99]IVFDPNTR.Q	Spt15	1	TBP	EANKIVFDPNTR	15	126.128	347104	127.131	283422	751958	379451	312751	0.82422	-0.278899	-0.278899
						0	3.60122	JL121323_121323_ABP_127_30B.18603.18603.4	N	6.40575	0.212978		1//13	8//53	3.154	1.1	K.E[111.03]ANK[2493.37]IVFDPNTR.Q	Spt15	1	TBP	EANKIVFDPNTR	15	2//15	11//83	3.25175	0.961538	K.E[111.03]FK[425.27]EANK[1791.98]IVFDPNTR.Q	Spt15	1	TBP	EFKEANKIVFDPNTR	15	126.127	909388	127.131	653792	1.09327e+06	995215	721449	0.724917	-0.464111	-0.464111
						-2	3.18906	JL121323_121323_ABP_127_30B.18365.18365.3	N	6.3385	0.200617		//13	8//41	3.0825	0.9	K.E[111.03]ANK[2493.37]IVFDPNTR.Q	Spt15	1	TBP	EANKIVFDPNTR	15	1//13	10//56	3.256	0.769231	K.E[111.03]FK[1791.98]EANK[425.27]IVFDPNTR.Q	Spt15	1	TBP	EFKEANKIVFDPNTR	15	126.128	289989	127.131	226347	737678	317141	249770	0.787569	-0.344523	-0.344523
						0	9.39546	JL121323_121323_ABP_127_50B.19948.19948.4	N	6.30225	0.261055		1//13	8//53	3.14	1.1	K.E[111.03]ANK[2493.39]IVFDPNTR.Q	Spt15	1	TBP	EANKIVFDPNTR	15	1//15	9//83	3.16225	0.884615	K.E[111.03]FK[425.27]EANK[1792.01]IVFDPNTR.Q	Spt15	1	TBP	EFKEANKIVFDPNTR	15	126.127	815591	127.131	642624	1.1322e+06	891882	709124	0.795088	-0.330813	-0.330813
						-3	4.39253	JL121323_121323_ABP_127_100B.14080.14080.3	N	6.2555	0.198903		//13	8//41	3.12775	1.05	K.E[111.03]ANK[1791.98]IVFDPNTR.Q	Spt15	1	TBP	EANKIVFDPNTR	15	//13	8//41	3.12775	1.05	K.E[111.03]ANK[1791.98]IVFDPNTR.Q	Spt15	1	TBP	EANKIVFDPNTR	15	126.127	220452	127.131	171319	377762	241102	189048	0.7841	-0.350891	-0.350891
						-2	12.576	JL121323_121323_ABP_127_D.22581.22581.4	N	6.175	0.185488		//16	8//87	3.0875	0.75	K.EFK[2511.31]EANK[425.27]IVFDPNTR.Q	Spt15	1	TBP	EFKEANKIVFDPNTR	15	//16	8//87	3.0875	0.75	K.EFK[2511.31]EANK[425.27]IVFDPNTR.Q	Spt15	1	TBP	EFKEANKIVFDPNTR	15	126.127	161840	127.13	160935	586914	176573	177590	1.00576	0.00828457	0.00828457
						-1	2.26131	JL121323_121323_ABP_127_1ug.18566.18566.4	N	6.1175	0.157349		3//16	13//78	3.05875	1.03846	K.E[111.03]FKEANK[2196.19]IVFDPNTR.Q	Spt15	1	TBP	EFKEANKIVFDPNTR	15	3//16	13//78	3.05875	1.03846	K.E[111.03]FKEANK[2196.19]IVFDPNTR.Q	Spt15	1	TBP	EFKEANKIVFDPNTR	15	126.127	98478.6	127.13	88207.4	126400	107561	97335.4	0.90493	-0.144121	-0.144121
						-3	16.5664	JL121323_121323_ABP_127_30B.17052.17052.3	N	6.116	0.22111		1//16	10//56	3.058	0.884615	K.E[111.03]FKEANK[2196.24]IVFDPNTR.Q	Spt15	1	TBP	EFKEANKIVFDPNTR	15	1//16	10//56	3.058	0.884615	K.E[111.03]FKEANK[2196.24]IVFDPNTR.Q	Spt15	1	TBP	EFKEANKIVFDPNTR	15	126.127	275928	127.131	173364	1.23359e+06	302274	191305	0.632885	-0.659985	-0.659985
						0	2.29913	JL121323_121323_ABP_127_30B.17825.17825.4	N	6.06575	0.229611		1//13	11//53	3.02275	1.35	K.E[111.03]ANK[2493.36]IVFDPNTR.Q	Spt15	1	TBP	EANKIVFDPNTR	15	1//15	12//83	3.043	1.07692	K.E[111.03]FK[425.27]EANK[1791.98]IVFDPNTR.Q	Spt15	1	TBP	EFKEANKIVFDPNTR	15	126.127	1.00282e+06	127.13	720368	1.59986e+06	1.09747e+06	794915	0.724315	-0.465312	-0.465312
						-3	10.0614	JL121323_121323_ABP_127_30B.24448.24448.4	N	6.0095	0.166114		//16	13//87	3.00475	0.928571	K.EFK[2511.32]EANK[425.27]IVFDPNTR.Q	Spt15	1	TBP	EFKEANKIVFDPNTR	15	//16	13//87	3.00475	0.928571	K.EFK[2511.32]EANK[425.27]IVFDPNTR.Q	Spt15	1	TBP	EFKEANKIVFDPNTR	15	126.128	164961	127.131	174283	405890	179853	192318	1.06931	0.0966811	0.0966811
						-3	18.6521	JL121323_121323_ABP_127_D.22570.22570.4	N	5.927	0.166993		3//16	9//88	2.9635	0.75	K.EFK[425.27]EANK[2511.28]IVFDPNTR.Q	Spt15	1	TBP	EFKEANKIVFDPNTR	15	3//16	9//88	2.9635	0.75	K.EFK[425.27]EANK[2511.28]IVFDPNTR.Q	Spt15	1	TBP	EFKEANKIVFDPNTR	15	126.127	147895	127.131	156244	570379	161246	172413	1.06925	0.0966019	0.0966019
						-2	4.31377	JL121323_121323_ABP_127_1ug.18057.18057.4	N	5.872	0.159293		1//13	8//53	2.6785	1.1	K.E[111.03]ANK[2493.34]IVFDPNTR.Q	Spt15	1	TBP	EANKIVFDPNTR	15	3//15	12//83	3.1935	1.07692	K.E[111.03]FK[425.27]EANK[1791.95]IVFDPNTR.Q	Spt15	1	TBP	EFKEANKIVFDPNTR	15	126.128	130622	127.131	105664	314840	142807	116599	0.81648	-0.292511	-0.292511
						-3	3.297	JL121323_121323_ABP_127_30B.24473.24473.5	N	5.847	0.173855		1//16	11//115	2.9235	0.928571	K.EFK[425.27]EANK[2511.38]IVFDPNTR.Q	Spt15	1	TBP	EFKEANKIVFDPNTR	15	1//16	11//115	2.9235	0.928571	K.EFK[425.27]EANK[2511.38]IVFDPNTR.Q	Spt15	1	TBP	EFKEANKIVFDPNTR	15	126.127	418446	127.13	422326	836333	456462	466030	1.02096	0.0299284	0.0299284
						0	0.825888	JL121323_121323_ABP_127_30B.19456.19456.4	N	5.734	0.19272		1//13	9//53	2.8495	1.15	K.E[111.03]ANK[2493.35]IVFDPNTR.Q	Spt15	1	TBP	EANKIVFDPNTR	15	1//15	11//83	2.8845	0.961538	K.E[111.03]FK[425.27]EANK[1791.97]IVFDPNTR.Q	Spt15	1	TBP	EFKEANKIVFDPNTR	15	126.128	646546	127.131	511384	878417	707000	564304	0.798166	-0.325239	-0.325239
						-1	6.22697	JL121323_121323_ABP_127_70B.18483.18483.3	N	5.724	0.204805		//13	7//41	2.862	1	K.E[111.03]ANK[1809.96]IVFDPNTR.Q	Spt15	1	TBP	EANKIVFDPNTR	15	//14	7//44	2.862	0.909091	K.EANK[1791.95]IVFDPNTR.Q	Spt15	1	TBP	EANKIVFDPNTR	15	126.127	239580	127.131	195078	239580	261914	215265	0.821892	-0.282979	-0.282979
						-2	4.87851	JL121323_121323_ABP_127_50B.19103.19103.3	N	5.6075	0.171812		1//13	10//41	2.80375	1.15	K.E[111.03]ANK[1791.99]IVFDPNTR.Q	Spt15	1	TBP	EANKIVFDPNTR	15	1//13	10//41	2.80375	1.15	K.E[111.03]ANK[1791.99]IVFDPNTR.Q	Spt15	1	TBP	EANKIVFDPNTR	15	126.127	499974	127.131	380484	499974	546905	419858	0.767699	-0.381387	-0.381387
						-3	13.0085	JL121323_121323_ABP_127_30B.14125.14125.3	N	5.568	0.226011		//13	7//41	2.784	1	K.E[111.03]ANK[1791.93]IVFDPNTR.Q	Spt15	1	TBP	EANKIVFDPNTR	15	//13	7//41	2.784	1	K.E[111.03]ANK[1791.93]IVFDPNTR.Q	Spt15	1	TBP	EANKIVFDPNTR	15	126.127	713464	127.131	472101	713464	781296	520956	0.666784	-0.584708	-0.584708
						0	20.0336	JL121323_121323_ABP_127_30B.18843.18843.5	N	5.5625	0.200501		//16	11//100	2.759	0.923077	K.E[111.03]FKEANK[2214.27]IVFDPNTR.Q	Spt15	1	TBP	EFKEANKIVFDPNTR	15	1//17	13//107	2.8035	0.928571	K.EFKEANK[2196.26]IVFDPNTR.Q	Spt15	1	TBP	EFKEANKIVFDPNTR	15	126.127	844114	127.13	591408	1.08205e+06	923968	652608	0.706311	-0.501625	-0.501625
						-3	3.94788	JL121323_121323_ABP_127_D.18373.18373.3	N	5.518	0.187203		//13	7//41	2.759	1	K.E[111.03]ANK[1791.96]IVFDPNTR.Q	Spt15	1	TBP	EANKIVFDPNTR	15	//13	7//41	2.759	1	K.E[111.03]ANK[1791.96]IVFDPNTR.Q	Spt15	1	TBP	EANKIVFDPNTR	15	126.127	207689	127.131	180881	207689	226907	199599	0.87965	-0.184998	-0.184998
						-3	5.05256	JL121323_121323_ABP_127_70B.13869.13869.3	N	5.513	0.167969		//13	8//41	2.7565	1.05	K.E[111.03]ANK[1791.99]IVFDPNTR.Q	Spt15	1	TBP	EANKIVFDPNTR	15	//13	8//41	2.7565	1.05	K.E[111.03]ANK[1791.99]IVFDPNTR.Q	Spt15	1	TBP	EANKIVFDPNTR	15	126.127	209803	127.131	151675	223802	229594	167371	0.728989	-0.456032	-0.456032
						-3	11.6332	JL121323_121323_ABP_127_50B.19039.19039.3	N	5.495	0.213871		2//16	11//56	2.7475	1	K.E[111.03]FKEANK[2196.22]IVFDPNTR.Q	Spt15	1	TBP	EFKEANKIVFDPNTR	15	2//16	11//56	2.7475	1	K.E[111.03]FKEANK[2196.22]IVFDPNTR.Q	Spt15	1	TBP	EFKEANKIVFDPNTR	15	126.127	207919	127.13	141345	634364	227641	155972	0.685168	-0.54547	-0.54547
						0	4.9033	JL121323_121323_ABP_127_30B.19342.19342.4	N	5.4815	0.179204		1//13	10//53	2.7305	1.3	K.E[111.03]ANK[2493.37]IVFDPNTR.Q	Spt15	1	TBP	EANKIVFDPNTR	15	1//15	12//83	2.751	1.07692	K.E[111.03]FK[425.27]EANK[1791.99]IVFDPNTR.Q	Spt15	1	TBP	EFKEANKIVFDPNTR	15	126.128	658911	127.131	522969	917241	720500	577087	0.800954	-0.320208	-0.320208
						-1	2.24285	JL121323_121323_ABP_127_70B.23648.23648.4	N	5.453	0.167862		1//17	10//83	2.7265	0.821429	K.EFKEANK[2214.18]IVFDPNTR.Q	Spt15	1	TBP	EFKEANKIVFDPNTR	15	1//17	10//83	2.7265	0.821429	K.EFKEANK[2214.18]IVFDPNTR.Q	Spt15	1	TBP	EFKEANKIVFDPNTR	15	126.127	205492	127.131	219357	459574	224016	242057	1.08053	0.111746	0.111746
						-2	8.59897	JL121323_121323_ABP_127_70B.17904.17904.5	N	5.42975	0.18632		1//13	10//65	2.5325	1.05	K.E[111.03]ANK[2493.39]IVFDPNTR.Q	Spt15	1	TBP	EANKIVFDPNTR	15	//13	11//108	2.89725	1	K.E[111.03]FK[1792]EANK[425.27]IVFDPNTR.Q	Spt15	1	TBP	EFKEANKIVFDPNTR	15	126.128	333438	127.131	290039	398706	364295	320053	0.878554	-0.186797	-0.186797
						-2	19.7019	JL121323_121323_ABP_127_50B.23126.23126.5	N	5.3735	0.215608		//14	10//74	2.68675	1.36364	K.EANK[1810.04]IVFDPNTR.Q	Spt15	1	TBP	EANKIVFDPNTR	15	//14	10//74	2.68675	1.36364	K.EANK[1810.04]IVFDPNTR.Q	Spt15	1	TBP	EANKIVFDPNTR	15	126.127	278637	127.131	279294	434628	303974	308196	1.01389	0.0198994	0.0198994
						-2	11.0751	JL121323_121323_ABP_127_100B.14069.14069.3	N	5.283	0.158513		//13	7//41	2.6415	1	K.E[111.03]ANK[1810.02]IVFDPNTR.Q	Spt15	1	TBP	EANKIVFDPNTR	15	//14	7//44	2.6415	0.909091	K.EANK[1792.01]IVFDPNTR.Q	Spt15	1	TBP	EANKIVFDPNTR	15	126.127	260247	127.13	186629	628773	284815	205942	0.723073	-0.467787	-0.467787
						-1	2.18258	JL121323_121323_ABP_127_100B.18324.18324.3	N	5.0845	0.161731		//13	8//41	2.54225	1.05	K.E[111.03]ANK[1791.98]IVFDPNTR.Q	Spt15	1	TBP	EANKIVFDPNTR	15	//13	8//41	2.54225	1.05	K.E[111.03]ANK[1791.98]IVFDPNTR.Q	Spt15	1	TBP	EANKIVFDPNTR	15	126.127	141697	127.131	128542	141697	154746	141844	0.916629	-0.125591	-0.125591
						-1	6.30413	JL121323_121323_ABP_127_30B.12081.12081.5	P	5.08225	0.169598	0.721	//18	12//128	2.64275	0.794118	R.LKEFKEANK[1809.98]IVFDPNTR.Q	Spt15	1	TBP	LKEFKEANKIVFDPNTR	15	//14	11//74	2.4395	1	K.EANK[2455.37]IVFDPNTR.Q	Spt15	1	TBP	EANKIVFDPNTR	15	126.127	1.01225e+06	127.131	762543	1.01225e+06	1.10736e+06	841453	0.759875	-0.396165	-0.396165
						0	0.370155	JL121323_121323_ABP_127_1ug.17847.17847.4	N	5.0745	0.172905		//13	6//53	2.449	0.85	K.E[111.03]ANK[2493.35]IVFDPNTR.Q	Spt15	1	TBP	EANKIVFDPNTR	15	1//15	10//83	2.6255	0.807692	K.E[111.03]FK[425.27]EANK[1791.97]IVFDPNTR.Q	Spt15	1	TBP	EFKEANKIVFDPNTR	15	126.128	170729	127.131	124083	492850	186825	136924	0.732896	-0.448319	-0.448319
						-3	19.3265	JL121323_121323_ABP_127_30B.19290.19290.5	N	4.833	0.159484		1//16	10//100	2.4165	1.07692	K.E[111.03]FKEANK[2196.25]IVFDPNTR.Q	Spt15	1	TBP	EFKEANKIVFDPNTR	15	1//16	10//100	2.4165	1.07692	K.E[111.03]FKEANK[2196.25]IVFDPNTR.Q	Spt15	1	TBP	EFKEANKIVFDPNTR	15	126.128	748372	127.131	594511	873934	818315	656033	0.801688	-0.318888	-0.318888
						-3	14.2895	JL121323_121323_ABP_127_50B.18952.18952.3	N	4.746	0.173101		1//16	9//56	2.373	0.846154	K.E[111.03]FKEANK[2196.23]IVFDPNTR.Q	Spt15	1	TBP	EFKEANKIVFDPNTR	15	1//16	9//56	2.373	0.846154	K.E[111.03]FKEANK[2196.23]IVFDPNTR.Q	Spt15	1	TBP	EFKEANKIVFDPNTR	15	126.127	184623	127.131	124209	475871	202151	137063	0.678023	-0.560594	-0.560594
						-1	0.702574	JL121323_121323_ABP_127_70B.17708.17708.5	N	4.73275	0.166015		1//13	10//65	2.2	1.05	K.E[111.03]ANK[2493.35]IVFDPNTR.Q	Spt15	1	TBP	EANKIVFDPNTR	15	//13	12//108	2.53275	0.923077	K.E[111.03]FK[1791.97]EANK[425.27]IVFDPNTR.Q	Spt15	1	TBP	EFKEANKIVFDPNTR	15	126.128	436251	127.131	357116	906718	476895	394072	0.826327	-0.275215	-0.275215
						-1	15.6075	JL121323_121323_ABP_127_D.20298.20298.4	N	4.691	0.152278		//13	6//53	2.3455	0.85	K.E[111.03]ANK[1792.02]IVFDPNTR.Q	Spt15	1	TBP	EANKIVFDPNTR	15	//13	6//53	2.3455	0.85	K.E[111.03]ANK[1792.02]IVFDPNTR.Q	Spt15	1	TBP	EANKIVFDPNTR	15	126.128	184365	127.131	160707	184365	201423	177337	0.880423	-0.183731	-0.183731
						-3	15.8074	JL121323_121323_ABP_127_D.17436.17436.3	N	4.591	0.167692		1//16	8//56	2.2955	0.807692	K.E[111.03]FKEANK[2196.24]IVFDPNTR.Q	Spt15	1	TBP	EFKEANKIVFDPNTR	15	1//16	8//56	2.2955	0.807692	K.E[111.03]FKEANK[2196.24]IVFDPNTR.Q	Spt15	1	TBP	EFKEANKIVFDPNTR	15	126.127	168303	127.13	112581	640443	184290	124231	0.674107	-0.568951	-0.568951
						-1	14.1909	JL121323_121323_ABP_127_100B.15155.15155.3	N	4.536	0.170925		//13	8//41	2.268	1.05	K.E[111.03]ANK[1792.01]IVFDPNTR.Q	Spt15	1	TBP	EANKIVFDPNTR	15	//13	8//41	2.268	1.05	K.E[111.03]ANK[1792.01]IVFDPNTR.Q	Spt15	1	TBP	EANKIVFDPNTR	15	126.127	139712	127.131	94035.4	212743	152975	103767	0.678322	-0.559958	-0.559958
						-3	18.2988	JL121323_121323_ABP_127_30B.46094.46094.5	N	4.4325	0.166598		//16	9//100	2.21625	0.846154	K.E[111.03]FKEANK[2196.25]IVFDPNTR.Q	Spt15	1	TBP	EFKEANKIVFDPNTR	15	//16	9//100	2.21625	0.846154	K.E[111.03]FKEANK[2196.25]IVFDPNTR.Q	Spt15	1	TBP	EFKEANKIVFDPNTR	15	126.127	38837.5	127.131	31840.6	91101.1	42455.3	35135.6	0.827589	-0.273013	-0.273013
						-1	13.6476	JL121323_121323_ABP_127_50B.14049.14049.5	N	4.361	0.158544		1//14	8//74	2.0615	0.909091	K.EANK[2511.42]IVFDPNTR.Q	Spt15	1	TBP	EANKIVFDPNTR	15	1//16	11//115	2.2995	0.892857	K.EFK[425.27]EANK[1810.03]IVFDPNTR.Q	Spt15	1	TBP	EFKEANKIVFDPNTR	15	126.127	1.12993e+06	127.131	930833	1.12993e+06	1.23513e+06	1.02716e+06	0.831621	-0.266003	-0.266003
						-1	16.8709	JL121323_121323_ABP_127_30B.12343.12343.5	N	4.281	0.151833		1//14	11//74	2.13025	1.13636	K.EANK[2511.43]IVFDPNTR.Q	Spt15	1	TBP	EANKIVFDPNTR	15	1//16	11//115	2.15075	0.892857	K.EFK[425.27]EANK[1810.05]IVFDPNTR.Q	Spt15	1	TBP	EFKEANKIVFDPNTR	15	126.128	1.00635e+06	127.131	757615	1225409	1.10091e+06	836015	0.759384	-0.397098	-0.397098
						-2	16.242	JL121323_121323_ABP_127_30B.16501.16501.3	N	4.256	0.162672		2//16	10//56	2.128	0.846154	K.E[111.03]FKEANK[2196.24]IVFDPNTR.Q	Spt15	1	TBP	EFKEANKIVFDPNTR	15	2//16	10//56	2.128	0.846154	K.E[111.03]FKEANK[2196.24]IVFDPNTR.Q	Spt15	1	TBP	EFKEANKIVFDPNTR	15	126.127	281099	127.131	168479	1.10123e+06	308037	185914	0.603544	-0.728469	-0.728469
						-2	15.7676	JL121323_121323_ABP_127_D.17026.17026.3	N	3.898	0.176209		2//16	10//56	1.949	0.884615	K.E[111.03]FKEANK[2196.24]IVFDPNTR.Q	Spt15	1	TBP	EFKEANKIVFDPNTR	15	2//16	10//56	1.949	0.884615	K.E[111.03]FKEANK[2196.24]IVFDPNTR.Q	Spt15	1	TBP	EFKEANKIVFDPNTR	15	126.127	368478	127.131	224346	2.69401e+06	403747	247562	0.61316	-0.705665	-0.705665
						-2	18.6144	JL121323_121323_ABP_127_50B.18501.18501.3	N	3.6725	0.164039		1//16	8//56	1.83625	0.692308	K.E[111.03]FKEANK[2196.25]IVFDPNTR.Q	Spt15	1	TBP	EFKEANKIVFDPNTR	15	1//16	8//56	1.83625	0.692308	K.E[111.03]FKEANK[2196.25]IVFDPNTR.Q	Spt15	1	TBP	EFKEANKIVFDPNTR	15	126.127	433690	127.131	264872	3099706	475191	292282	0.615083	-0.701146	-0.701146
						-3	2.64132	JL121323_121323_ABP_127_30B.19722.19722.5	P	3.6255	0.129072	0.52	1//16	12//121	1.76025	0.8	K.E[111.03]FK[425.27]EANK[1791.97]IVFDPNTR.Q	Spt15	1	TBP	EFKEANKIVFDPNTR	15	2//15	11//79	1.86525	1.04167	K.E[111.03]ANK[2493.35]IVFDPNTR.Q	Spt15	1	TBP	EANKIVFDPNTR	15	126.128	695289	127.131	577023	695289	759972	636735	0.83784	-0.255253	-0.255253
						-1	-0.466176	JL121323_121323_ABP_127_1ug.19602.19602.3	P	2.9945	0.0795194	0.19	1//14	9//44	1.49725	0.916667	K.EANK[1791.97]IVFDPNTR.Q	Spt15	1	TBP	EANKIVFDPNTR	15	1//15	9//47	1.49725	0.916667	K.E[111.03]ANK[1809.98]IVFDPNTR.Q	Spt15	1	TBP	EANKIVFDPNTR	15	126.127	69618.2	127.131	76467.5	129245	75867.5	84380.6	1.11221	0.153429	0.153429
	49	TBP:15---TBP:167	2.5285	-0.0428453	0.0428453
						0	9.80783	JL121323_121323_ABP_127_30B.24050.24050.5	P	2.5285	0.100617	0.799	//17	4//105	0.36225	0.2	K.IQNIVGSC[160.03]DVK[1809.98]FPIR.L	Spt15	1	TBP	IQNIVGSCDVKFPIR	167	//14	8//74	2.16625	0.791667	K.EANK[2152.19]IVFDPNTR.Q	Spt15	1	TBP	EANKIVFDPNTR	15	126.128	229338	127.131	220199	363927	250310	242986	0.970739	-0.0428453	-0.0428453
	50	TBP:15---TBP:199	4.9105	-0.0185313	0.0185313
						-1	5.49498	JL121323_121323_ABP_127_30B.25956.25956.3	N	4.9105	0.161782		//7	4//14	1.0675	1	R.M[147.04]VK[2196.19]PK.I	Spt15	1	TBP	MVKPK	199	1//16	11//60	3.843	1	K.E[111.03]FKEANK[1024.63]IVFDPNTR.Q	Spt15	1	TBP	EFKEANKIVFDPNTR	15	126.127	610382	127.131	644117	647177	665493	710773	1.06804	0.0949651	0.0949651
						0	7.95847	JL121323_121323_ABP_127_30B.25677.25677.3	P	1.533	0.0495363	0.794	1//15	7//55	1.353	0.625	K.E[111.03]ANK[1008.62]IVFDPNTR.Q	Spt15	1	TBP	EANKIVFDPNTR	15	//7	2//14	0.18	0.4	R.MVK[1791.97]PK.I	Spt15	1	TBP	MVKPK	199	126.128	670860	127.131	592800	790369	732832	654145	0.892626	-0.163872	-0.163872
						-1	17.83	JL121323_121323_ABP_127_30B.26130.26130.3	P	1.23275	0.0426808	0.731	2//14	10//51	1.03425	0.75	K.EANK[1024.62]IVFDPNTR.Q	Spt15	1	TBP	EANKIVFDPNTR	15	//8	2//16	0.1985	0.4	R.M[147.04]VK[1809.98]PK.I	Spt15	1	TBP	MVKPK	199	126.127	468864	127.131	461224	517124	511606	508954	0.994816	-0.0074982	-0.0074982
						0	5.67205	JL121323_121323_ABP_127_30B.26134.26134.3	P	1.15375	0.0427766	0.8	2//14	9//51	1.00625	0.791667	K.EANK[1024.62]IVFDPNTR.Q	Spt15	1	TBP	EANKIVFDPNTR	15	//8	2//16	0.1475	0.4	R.M[147.04]VK[1809.98]PK.I	Spt15	1	TBP	MVKPK	199	126.127	447929	127.131	443594	503372	488726	489499	1.00158	0.00227961	0.00227961
	51	TBP:15---TBP:35	16.2293	-0.397013	0.397013
						-1	-0.30185	JL121323_121323_ABP_127_30B.10494.10494.4	NP	16.2293	0.54404	2.35e-05	//19	33//97	13.553	3.02941	R.DGTK[1809.98]PATTFQSEEDIKR.A	Spt15	1	TBP	DGTKPATTFQSEEDIKR	35	1//14	12//59	2.67625	1.125	K.EANK[2329.2]IVFDPNTR.Q	Spt15	1	TBP	EANKIVFDPNTR	15	126.127	404354	127.131	325376	2.3849e+06	442095	359047	0.812149	-0.300184	-0.300184
						0	3.55592	JL121323_121323_ABP_127_30B.10357.10357.5	NP	15.4942	0.489411	2.23e-07	//19	28//126	9.8955	2.32353	R.DGTK[1809.98]PATTFQSEEDIKR.A	Spt15	1	TBP	DGTKPATTFQSEEDIKR	35	//14	17//74	5.59875	1.79167	K.EANK[2329.2]IVFDPNTR.Q	Spt15	1	TBP	EANKIVFDPNTR	15	126.128	1.27068e+06	127.131	958345	5998475	1.39006e+06	1.05752e+06	0.76077	-0.394467	-0.394467
						0	2.03166	JL121323_121323_ABP_127_1ug.11258.11258.5	NP	14.1898	0.453209	3.33e-05	//19	26//126	8.284	2	R.DGTK[1809.98]PATTFQSEEDIKR.A	Spt15	1	TBP	DGTKPATTFQSEEDIKR	35	1//14	17//74	5.90575	1.91667	K.EANK[2329.2]IVFDPNTR.Q	Spt15	1	TBP	EANKIVFDPNTR	15	126.128	142166	127.131	112766	771483	155455	124435	0.800458	-0.321103	-0.321103
						0	3.28863	JL121323_121323_ABP_127_50B.11798.11798.4	NP	13.5162	0.526047	0.00116	//19	29//97	10.9932	2.47059	R.DGTK[1809.98]PATTFQSEEDIKR.A	Spt15	1	TBP	DGTKPATTFQSEEDIKR	35	//14	8//59	2.523	0.791667	K.EANK[2329.2]IVFDPNTR.Q	Spt15	1	TBP	EANKIVFDPNTR	15	126.127	416518	127.131	364933	1.44912e+06	455033	402697	0.884985	-0.176275	-0.176275
						-1	2.02741	JL121323_121323_ABP_127_30B.11897.11897.5	NP	13.5023	0.441243	0.00137	//19	30//126	12.2607	2.88235	R.DGTK[2511.36]PATTFQSEEDIKR.A	Spt15	1	TBP	DGTKPATTFQSEEDIKR	35	//16	13//115	1.2415	0.6	K.EFK[425.27]EANK[2329.2]IVFDPNTR.Q	Spt15	1	TBP	EFKEANKIVFDPNTR	15	126.128	1.43102e+06	127.131	914517	5.31165e+06	1.56747e+06	1.00915e+06	0.643811	-0.635291	-0.635291
						-1	0.306114	JL121323_121323_ABP_127_30B.11813.11813.6	N	13.0693	0.444041		//19	23//97	8.7955	2.09375	R.DGTK[2511.37]PATTFQSEEDIKR.A	Spt15	1	TBP	DGTKPATTFQSEEDIKR	35	//16	12//87	4.27375	1.32143	K.EFK[2329.2]EANK[425.27]IVFDPNTR.Q	Spt15	1	TBP	EFKEANKIVFDPNTR	15	126.128	708034	127.131	524280	1187676	774672	578534	0.746812	-0.421183	-0.421183
						-2	4.11916	JL121323_121323_ABP_127_30B.11411.11411.5	P	12.5612	0.453311	0.00213	//14	9//130	1.64075	0.588235	R.LKEFK[425.27]EANK[2329.2]IVFDPNTR.Q	Spt15	1	TBP	LKEFKEANKIVFDPNTR	15	//19	30//126	10.9205	2.35294	R.DGTK[2752.54]PATTFQSEEDIKR.A	Spt15	1	TBP	DGTKPATTFQSEEDIKR	35	126.128	531483	127.131	380086	2.43514e+06	581668	419419	0.721061	-0.471806	-0.471806
						-1	3.22088	JL121323_121323_ABP_127_1ug.11268.11268.4	NP	12.2835	0.399249	0.283	//19	26//97	10.4015	2.17647	R.DGTK[1809.98]PATTFQSEEDIKR.A	Spt15	1	TBP	DGTKPATTFQSEEDIKR	35	1//14	12//59	1.882	0.875	K.EANK[2329.2]IVFDPNTR.Q	Spt15	1	TBP	EANKIVFDPNTR	15	126.127	113558	127.131	86306.8	779065	124219	95238.1	0.766696	-0.383274	-0.383274
						2152	-22.0958	JL121323_121323_ABP_127_50B.13349.13349.3	P	11.8277	0.434277	3.5e-07	//19	19//68	8.38825	1.70588	R.DGTK[2511.36]PATTFQSEEDIKR.A	Spt15	1	TBP	DGTKPATTFQSEEDIKR	35	//16	10//61	3.4395	0.966667	K.EFK[425.27]EANK[2329.2]IVFDPNTR.Q	Spt15	1	TBP	EFKEANKIVFDPNTR	15	126.128	1.89059e+06	127.131	1530245	1.89059e+06	2.06695e+06	1.6886e+06	0.816954	-0.291673	-0.291673
						2153	92.9652	JL121323_121323_ABP_127_50B.13326.13326.3	P	11.401	0.418155	5.23e-06	//19	18//68	8.144	1.67647	R.DGTK[2511.36]PATTFQSEEDIKR.A	Spt15	1	TBP	DGTKPATTFQSEEDIKR	35	//16	8//61	3.257	0.833333	K.EFK[425.27]EANK[2329.2]IVFDPNTR.Q	Spt15	1	TBP	EFKEANKIVFDPNTR	15	126.128	1.99016e+06	127.131	1.61798e+06	1.99016e+06	2.17572e+06	1.78541e+06	0.820609	-0.285233	-0.285233
						-2	20.272	JL121323_121323_ABP_127_30B.10624.10624.5	NP	11.1705	0.342254	0.00401	//19	22//126	7.385	1.73529	R.DGTK[1809.98]PATTFQSEEDIKR.A	Spt15	1	TBP	DGTKPATTFQSEEDIKR	35	//14	10//74	3.7855	1.04167	K.EANK[2329.2]IVFDPNTR.Q	Spt15	1	TBP	EANKIVFDPNTR	15	126.128	567657	127.131	554751	573165	619449	612159	0.988232	-0.0170787	-0.0170787
						0	-1.14343	JL121323_121323_ABP_127_100B.12600.12600.5	P	11.0262	0.311683	3.21e-05	//14	9//130	0.8495	0.411765	R.LKEFK[425.27]EANK[2329.2]IVFDPNTR.Q	Spt15	1	TBP	LKEFKEANKIVFDPNTR	15	//19	29//126	10.1768	2.32353	R.DGTK[2752.54]PATTFQSEEDIKR.A	Spt15	1	TBP	DGTKPATTFQSEEDIKR	35	126.128	112197	127.131	81804	851292	122772	90269.4	0.73526	-0.443673	-0.443673
						0	4.36517	JL121323_121323_ABP_127_30B.10384.10384.6	NP	11.0055	0.360783	9.87e-06	//19	23//126	8.363	2.08824	R.DGTK[1809.98]PATTFQSEEDIKR.A	Spt15	1	TBP	DGTKPATTFQSEEDIKR	35	1//14	10//74	2.6425	0.916667	K.EANK[2329.2]IVFDPNTR.Q	Spt15	1	TBP	EANKIVFDPNTR	15	126.128	725284	127.131	518561	4.71266e+06	793770	572224	0.720894	-0.472141	-0.472141
						0	5.88943	JL121323_121323_ABP_127_30B.10475.10475.6	NP	10.9175	0.43265	1.07e-06	//19	23//126	8.31825	2.08824	R.DGTK[1809.98]PATTFQSEEDIKR.A	Spt15	1	TBP	DGTKPATTFQSEEDIKR	35	//14	10//74	2.59925	0.916667	K.EANK[2329.2]IVFDPNTR.Q	Spt15	1	TBP	EANKIVFDPNTR	15	126.128	379687	127.131	325846	1.50774e+06	414878	359566	0.866677	-0.206434	-0.206434
						-2	8.04957	JL121323_121323_ABP_127_100B.12874.12874.6	NP	10.882	0.357866	2.15e-13	//19	22//126	7.427	1.67647	R.DGTK[2511.36]PATTFQSEEDIKR.A	Spt15	1	TBP	DGTKPATTFQSEEDIKR	35	//16	10//115	3.455	0.9	K.EFK[425.27]EANK[2329.2]IVFDPNTR.Q	Spt15	1	TBP	EFKEANKIVFDPNTR	15	126.128	88397.5	127.131	65140.1	157186	96721	71881	0.743178	-0.428219	-0.428219
						0	1.01549	JL121323_121323_ABP_127_50B.11790.11790.5	NP	10.5002	0.363784	0.000204	//19	21//126	5.86075	1.5	R.DGTK[1809.98]PATTFQSEEDIKR.A	Spt15	1	TBP	DGTKPATTFQSEEDIKR	35	1//14	18//74	4.6395	2	K.EANK[2329.2]IVFDPNTR.Q	Spt15	1	TBP	EANKIVFDPNTR	15	126.127	728947	127.13	673915	1.30262e+06	795922	743654	0.93433	-0.0979955	-0.0979955
						0	3.38656	JL121323_121323_ABP_127_30B.10763.10763.5	NP	10.1475	0.264775	0.000506	//19	16//126	3.11875	0.911765	R.DGTK[1809.98]PATTFQSEEDIKR.A	Spt15	1	TBP	DGTKPATTFQSEEDIKR	35	//14	23//74	7.02875	2.58333	K.EANK[2329.2]IVFDPNTR.Q	Spt15	1	TBP	EANKIVFDPNTR	15	126.128	1.67591e+06	127.131	1344943	6875679	1.83238e+06	1.48412e+06	0.809943	-0.304108	-0.304108
						0	-1.11479	JL121323_121323_ABP_127_70B.10769.10769.4	P	10.06	0.31173	0.00522	//19	26//97	9.377	2.32353	R.DGTK[1809.98]PATTFQSEEDIKR.A	Spt15	1	TBP	DGTKPATTFQSEEDIKR	35	1//14	7//59	0.683	0.291667	K.EANK[2329.2]IVFDPNTR.Q	Spt15	1	TBP	EANKIVFDPNTR	15	126.127	209938	127.131	199927	805729	229156	220616	0.96273	-0.0547968	-0.0547968
						-2	0.756739	JL121323_121323_ABP_127_30B.11819.11819.5	N	9.4485	0.368506		//19	21//126	8.24175	1.84375	R.DGTK[2511.36]PATTFQSEEDIKR.A	Spt15	1	TBP	DGTKPATTFQSEEDIKR	35	//16	10//115	1.20675	0.678571	K.EFK[2329.2]EANK[425.27]IVFDPNTR.Q	Spt15	1	TBP	EFKEANKIVFDPNTR	15	126.128	908554	127.131	595655	2.08259e+06	995002	657296	0.660597	-0.598157	-0.598157
						0	7.48508	JL121323_121323_ABP_127_30B.12042.12042.6	NP	9.419	0.387111	0.00128	//15	23//129	5.638	1.64706	R.DGTK[1809.98]PATTFQSEEDIK[425.27]R.A	Spt15	1	TBP	DGTKPATTFQSEEDIKR	35	1//14	13//74	3.781	1.45833	K.EANK[2626.38]IVFDPNTR.Q	Spt15	1	TBP	EANKIVFDPNTR	15	126.127	838944	127.13	612995	2028791	918003	676430	0.73685	-0.440557	-0.440557
						0	4.26356	JL121323_121323_ABP_127_50B.11809.11809.6	NP	9.30675	0.393612	1.93e-05	//19	23//126	6.836	1.88235	R.DGTK[1809.98]PATTFQSEEDIKR.A	Spt15	1	TBP	DGTKPATTFQSEEDIKR	35	//14	8//74	2.47075	0.75	K.EANK[2329.2]IVFDPNTR.Q	Spt15	1	TBP	EANKIVFDPNTR	15	126.128	418877	127.131	392632	837555	457297	433262	0.947441	-0.0778919	-0.0778919
						0	0.436865	JL121323_121323_ABP_127_100B.12897.12897.6	N	9.226	0.314967		//19	18//97	5.98425	1.59375	R.DGTK[2511.37]PATTFQSEEDIKR.A	Spt15	1	TBP	DGTKPATTFQSEEDIKR	35	//16	8//88	3.24175	0.785714	K.EFK[425.27]EANK[2329.2]IVFDPNTR.Q	Spt15	1	TBP	EFKEANKIVFDPNTR	15	126.128	90204.2	127.131	70160.6	149108	98653	77421.1	0.784782	-0.349637	-0.349637
						0	-1.43315	JL121323_121323_ABP_127_50B.13447.13447.6	NP	9.22125	0.411746	0.000184	//15	19//129	5.3435	1.38235	R.DGTK[1809.98]PATTFQSEEDIK[425.27]R.A	Spt15	1	TBP	DGTKPATTFQSEEDIKR	35	1//14	11//74	3.87775	1.29167	K.EANK[2626.38]IVFDPNTR.Q	Spt15	1	TBP	EANKIVFDPNTR	15	126.127	533084	127.131	436149	960827	582753	481283	0.825879	-0.275998	-0.275998
						-2	3.55423	JL121323_121323_ABP_127_D.14437.14437.7	P	8.6855	0.30593	4.92e-05	//14	12//130	2.8235	1.08824	R.LKEFK[425.27]EANK[2626.38]IVFDPNTR.Q	Spt15	1	TBP	LKEFKEANKIVFDPNTR	15	//15	25//129	5.862	1.76471	R.DGTK[2752.54]PATTFQSEEDIK[425.27]R.A	Spt15	1	TBP	DGTKPATTFQSEEDIKR	35	126.128	296680	127.131	178319	544978	325106	196772	0.605255	-0.724384	-0.724384
						-1	3.26406	JL121323_121323_ABP_127_30B.11968.11968.5	NP	8.49075	0.294297	0.000927	//15	20//129	4.177	1.20588	R.DGTK[1809.98]PATTFQSEEDIK[425.27]R.A	Spt15	1	TBP	DGTKPATTFQSEEDIKR	35	1//14	17//74	4.31375	1.79167	K.EANK[2626.38]IVFDPNTR.Q	Spt15	1	TBP	EANKIVFDPNTR	15	126.128	941009	127.131	700699	2.2315e+06	1.02953e+06	773210	0.751035	-0.413049	-0.413049
						-1	9.83539	JL121323_121323_ABP_127_1ug.12988.12988.5	NP	8.4255	0.27942	0.226	//15	20//129	3.808	1.14706	R.DGTK[1809.98]PATTFQSEEDIK[425.27]R.A	Spt15	1	TBP	DGTKPATTFQSEEDIKR	35	//14	16//74	4.6175	1.79167	K.EANK[2626.38]IVFDPNTR.Q	Spt15	1	TBP	EANKIVFDPNTR	15	126.128	221128	127.131	169116	783073	241875	186617	0.771544	-0.37418	-0.37418
						-2	8.97566	JL121323_121323_ABP_127_D.13755.13755.5	N	8.36825	0.25067		//19	22//126	6.87925	1.9375	R.DGTK[2511.33]PATTFQSEEDIKR.A	Spt15	1	TBP	DGTKPATTFQSEEDIKR	35	//16	10//115	1.489	0.607143	K.EFK[2329.16]EANK[425.27]IVFDPNTR.Q	Spt15	1	TBP	EFKEANKIVFDPNTR	15	126.128	285351	127.131	187473	1.31251e+06	312497	206874	0.662002	-0.595091	-0.595091
						-2	2.12983	JL121323_121323_ABP_127_1ug.11323.11323.6	N	8.315	0.306623		//14	7//59	2.544	0.909091	K.EANK[2329.19]IVFDPNTR.Q	Spt15	1	TBP	EANKIVFDPNTR	15	//19	20//97	5.771	1.90625	R.DGTK[1809.97]PATTFQSEEDIKR.A	Spt15	1	TBP	DGTKPATTFQSEEDIKR	35	126.128	52234.3	127.131	50801.1	297302	57003.1	56058.2	0.983424	-0.0241151	-0.0241151
						0	-0.045505	JL121323_121323_ABP_127_D.13502.13502.6	P	8.29275	0.324913	0.106	//14	12//130	2.165	0.676471	R.LKEFK[425.27]EANK[2329.2]IVFDPNTR.Q	Spt15	1	TBP	LKEFKEANKIVFDPNTR	15	//19	24//126	6.12775	1.85294	R.DGTK[2752.54]PATTFQSEEDIKR.A	Spt15	1	TBP	DGTKPATTFQSEEDIKR	35	126.127	265761	127.131	171276	2.3746e+06	291084	189000	0.649298	-0.623048	-0.623048
						0	5.17811	JL121323_121323_ABP_127_50B.11805.11805.6	NP	7.8025	0.329797	3.06e-05	//19	21//126	5.22825	1.55882	R.DGTK[1809.98]PATTFQSEEDIKR.A	Spt15	1	TBP	DGTKPATTFQSEEDIKR	35	//14	10//74	2.57425	0.916667	K.EANK[2329.2]IVFDPNTR.Q	Spt15	1	TBP	EANKIVFDPNTR	15	126.128	385225	127.131	373749	742966	420406	412426	0.98102	-0.0276452	-0.0276452
						0	5.12594	JL121323_121323_ABP_127_30B.11960.11960.5	NP	7.71575	0.307873	0.0481	//15	18//129	4.14575	1.08824	R.DGTK[1809.98]PATTFQSEEDIK[425.27]R.A	Spt15	1	TBP	DGTKPATTFQSEEDIKR	35	//14	12//74	3.57	1.20833	K.EANK[2626.38]IVFDPNTR.Q	Spt15	1	TBP	EANKIVFDPNTR	15	126.127	839196	127.13	705324	1.29054e+06	917158	778313	0.848614	-0.23682	-0.23682
						-2	5.57471	JL121323_121323_ABP_127_D.13779.13779.5	N	7.64375	0.247479		//19	22//126	5.9735	1.9375	R.DGTK[2511.34]PATTFQSEEDIKR.A	Spt15	1	TBP	DGTKPATTFQSEEDIKR	35	//16	12//115	1.67025	0.75	K.EFK[425.27]EANK[2329.18]IVFDPNTR.Q	Spt15	1	TBP	EFKEANKIVFDPNTR	15	126.127	258356	127.13	180594	839580	282802	199283	0.704673	-0.504973	-0.504973
						0	7.62061	JL121323_121323_ABP_127_50B.11865.11865.5	NP	7.412	0.28822	0.00117	//19	17//126	4.2765	1.11765	R.DGTK[1809.98]PATTFQSEEDIKR.A	Spt15	1	TBP	DGTKPATTFQSEEDIKR	35	//14	11//74	3.1355	1	K.EANK[2329.2]IVFDPNTR.Q	Spt15	1	TBP	EANKIVFDPNTR	15	126.128	676798	127.131	680600	1141676	738314	751031	1.01722	0.0246374	0.0246374
						-3	3.59203	JL121323_121323_ABP_127_50B.14614.14614.7	P	7.2035	0.248804	0.000858	//11	9//134	1.9615	0.764706	R.LK[425.27]EFK[425.27]EANK[2329.2]IVFDPNTR.Q	Spt15	1	TBP	LKEFKEANKIVFDPNTR	15	//19	20//126	5.242	1.61765	R.DGTK[3049.72]PATTFQSEEDIKR.A	Spt15	1	TBP	DGTKPATTFQSEEDIKR	35	126.128	1549892	127.131	1.03652e+06	2.55008e+06	1.69711e+06	1.14378e+06	0.673956	-0.569273	-0.569273
						0	1.44912	JL121323_121323_ABP_127_50B.13401.13401.5	NP	6.90525	0.258861	0.624	//15	15//129	3.6815	0.941176	R.DGTK[1809.98]PATTFQSEEDIK[425.27]R.A	Spt15	1	TBP	DGTKPATTFQSEEDIKR	35	//14	11//74	3.22375	1.08333	K.EANK[2626.38]IVFDPNTR.Q	Spt15	1	TBP	EANKIVFDPNTR	15	126.128	787032	127.131	672329	801844	860017	741904	0.862662	-0.213133	-0.213133
						0	3.55961	JL121323_121323_ABP_127_30B.10616.10616.4	NP	6.8275	0.264883	0.00365	//19	17//97	4.40825	1.05882	R.DGTK[1809.98]PATTFQSEEDIKR.A	Spt15	1	TBP	DGTKPATTFQSEEDIKR	35	//14	8//59	2.41925	0.875	K.EANK[2329.2]IVFDPNTR.Q	Spt15	1	TBP	EANKIVFDPNTR	15	126.127	394539	127.131	351877	819687	430946	388291	0.901019	-0.150371	-0.150371
						-2	2.41918	JL121323_121323_ABP_127_70B.12374.12374.5	NP	6.6775	0.262863	6.55e-07	//15	16//129	3.54175	1.02941	R.DGTK[1809.98]PATTFQSEEDIK[425.27]R.A	Spt15	1	TBP	DGTKPATTFQSEEDIKR	35	//14	11//74	3.13575	1.08333	K.EANK[2626.38]IVFDPNTR.Q	Spt15	1	TBP	EANKIVFDPNTR	15	126.127	211143	127.131	192161	307736	230580	212046	0.919623	-0.120885	-0.120885
						-2	0.854576	JL121323_121323_ABP_127_100B.12884.12884.5	NP	6.55775	0.255319	3.29e-07	//15	15//129	3.2425	0.941176	R.DGTK[1809.98]PATTFQSEEDIK[425.27]R.A	Spt15	1	TBP	DGTKPATTFQSEEDIKR	35	//14	11//74	3.31525	1.08333	K.EANK[2626.38]IVFDPNTR.Q	Spt15	1	TBP	EANKIVFDPNTR	15	126.128	115913	127.131	87137.5	186690	126806	96154.8	0.758281	-0.399196	-0.399196
						0	7.27232	JL121323_121323_ABP_127_30B.10359.10359.3	NP	6.48	0.23731	0.0726	//19	15//68	3.304	1.05882	R.DGTK[1809.98]PATTFQSEEDIKR.A	Spt15	1	TBP	DGTKPATTFQSEEDIKR	35	//14	11//44	3.176	1.125	K.EANK[2329.2]IVFDPNTR.Q	Spt15	1	TBP	EANKIVFDPNTR	15	126.128	372828	127.131	242722	2932063	408323	267840	0.655951	-0.608341	-0.608341
						0	1.29266	JL121323_121323_ABP_127_70B.12377.12377.5	NP	5.91425	0.23273	0.000612	//15	13//129	3.015	0.882353	R.DGTK[1809.98]PATTFQSEEDIK[425.27]R.A	Spt15	1	TBP	DGTKPATTFQSEEDIKR	35	//14	11//74	2.89925	1	K.EANK[2626.38]IVFDPNTR.Q	Spt15	1	TBP	EANKIVFDPNTR	15	126.127	183044	127.13	162557	218511	199943	179380	0.897155	-0.156571	-0.156571
						0	4.70694	JL121323_121323_ABP_127_30B.11711.11711.6	P	5.5045	0.181556	0.174	//14	12//130	4.54375	1	R.LKEFK[425.27]EANK[2329.2]IVFDPNTR.Q	Spt15	1	TBP	LKEFKEANKIVFDPNTR	15	//19	9//126	0.96075	0.529412	R.DGTK[2752.54]PATTFQSEEDIKR.A	Spt15	1	TBP	DGTKPATTFQSEEDIKR	35	126.127	574900	127.131	402347	1.46409e+06	629292	443984	0.705529	-0.503223	-0.503223
						-1	-0.260305	JL121323_121323_ABP_127_30B.11639.11639.6	P	5.28525	0.176569	0.0359	//14	11//130	4.3645	0.794118	R.LKEFK[425.27]EANK[2329.2]IVFDPNTR.Q	Spt15	1	TBP	LKEFKEANKIVFDPNTR	15	//19	9//126	0.92075	0.5	R.DGTK[2752.54]PATTFQSEEDIKR.A	Spt15	1	TBP	DGTKPATTFQSEEDIKR	35	126.128	633291	127.131	412136	1.44713e+06	693585	454785	0.655701	-0.608889	-0.608889
						-3	16.0915	JL121323_121323_ABP_127_30B.11592.11592.5	N	5.2125	0.171758		//13	9//65	2.456	1.3	K.E[111.03]ANK[2329.26]IVFDPNTR.Q	Spt15	1	TBP	EANKIVFDPNTR	15	//19	13//126	2.7565	1	R.DGTK[1792.03]PATTFQSEEDIKR.A	Spt15	1	TBP	DGTKPATTFQSEEDIKR	35	126.127	974988	127.131	714886	1.49892e+06	1.06684e+06	788864	0.739443	-0.43549	-0.43549
						-1	2.15822	JL121323_121323_ABP_127_50B.16014.16014.6	P	5.16025	0.168713	0.511	//11	8//134	1.82775	0.529412	R.LK[425.27]EFK[425.27]EANK[2329.2]IVFDPNTR.Q	Spt15	1	TBP	LKEFKEANKIVFDPNTR	15	//19	15//126	3.3325	1.08824	R.DGTK[3049.72]PATTFQSEEDIKR.A	Spt15	1	TBP	DGTKPATTFQSEEDIKR	35	126.127	698668	127.131	458405	1.61421e+06	765141	505843	0.661111	-0.597036	-0.597036
						-1	0.705858	JL121323_121323_ABP_127_50B.13702.13702.6	NP	5.1455	0.185177	0.00635	//19	15//126	1.701	0.823529	R.DGTK[2511.36]PATTFQSEEDIKR.A	Spt15	1	TBP	DGTKPATTFQSEEDIKR	35	//16	13//115	3.4445	0.933333	K.EFK[425.27]EANK[2329.2]IVFDPNTR.Q	Spt15	1	TBP	EFKEANKIVFDPNTR	15	126.128	505648	127.131	431021	707793	552550	475624	0.86078	-0.216283	-0.216283
						0	4.09608	JL121323_121323_ABP_127_100B.13981.13981.7	P	5.00925	0.176615	5.38e-06	//11	12//134	3.134	0.941176	R.LK[425.27]EFK[425.27]EANK[2329.2]IVFDPNTR.Q	Spt15	1	TBP	LKEFKEANKIVFDPNTR	15	//19	12//126	1.87525	0.705882	R.DGTK[3049.72]PATTFQSEEDIKR.A	Spt15	1	TBP	DGTKPATTFQSEEDIKR	35	126.128	52970.5	127.131	38272	198470	57967.5	42232.5	0.728555	-0.45689	-0.45689
						-1	5.30141	JL121323_121323_ABP_127_30B.11904.11904.4	N	4.80675	0.219572		//19	11//97	2.788	0.75	R.DGTK[2511.39]PATTFQSEEDIKR.A	Spt15	1	TBP	DGTKPATTFQSEEDIKR	35	2//16	13//88	2.01875	0.785714	K.EFK[425.27]EANK[2329.22]IVFDPNTR.Q	Spt15	1	TBP	EFKEANKIVFDPNTR	15	126.127	489104	127.131	291848	3.73569e+06	535991	322050	0.600848	-0.734927	-0.734927
						0	1.22573	JL121323_121323_ABP_127_100B.13573.13573.6	P	4.69975	0.149407	0.00334	//11	10//134	1.29425	0.529412	R.LK[425.27]EFK[425.27]EANK[2329.2]IVFDPNTR.Q	Spt15	1	TBP	LKEFKEANKIVFDPNTR	15	//19	17//126	3.4055	1.23529	R.DGTK[3049.72]PATTFQSEEDIKR.A	Spt15	1	TBP	DGTKPATTFQSEEDIKR	35	126.128	238746	127.131	159301	1.68154e+06	261429	175786	0.672405	-0.572598	-0.572598
						-4	4.95571	JL121323_121323_ABP_127_50B.16459.16459.6	P	4.625	0.16484	0.282	//11	8//134	2.44325	0.647059	R.LK[425.27]EFK[425.27]EANK[2329.2]IVFDPNTR.Q	Spt15	1	TBP	LKEFKEANKIVFDPNTR	15	//19	13//126	2.18175	0.823529	R.DGTK[3049.72]PATTFQSEEDIKR.A	Spt15	1	TBP	DGTKPATTFQSEEDIKR	35	126.127	638354	127.131	457213	1.79434e+06	698622	504527	0.722174	-0.469581	-0.469581
						-1	7.21414	JL121323_121323_ABP_127_50B.12196.12196.5	P	4.56625	0.14974	0.724	//19	9//126	0.76575	0.323529	R.DGTK[1809.98]PATTFQSEEDIKR.A	Spt15	1	TBP	DGTKPATTFQSEEDIKR	35	//14	10//74	3.8005	0.958333	K.EANK[2329.2]IVFDPNTR.Q	Spt15	1	TBP	EANKIVFDPNTR	15	126.128	922803	127.131	884937	978519	1.0072e+06	976513	0.969529	-0.0446438	-0.0446438
						-2	1.71025	JL121323_121323_ABP_127_30B.11690.11690.7	P	4.47225	0.133576	0.0423	//14	15//130	3.796	0.941176	R.LKEFK[425.27]EANK[2329.2]IVFDPNTR.Q	Spt15	1	TBP	LKEFKEANKIVFDPNTR	15	//19	9//126	0.67625	0.382353	R.DGTK[2752.54]PATTFQSEEDIKR.A	Spt15	1	TBP	DGTKPATTFQSEEDIKR	35	126.128	410723	127.131	271105	1.11591e+06	449780	299160	0.665124	-0.588305	-0.588305
						0	7.87921	JL121323_121323_ABP_127_50B.14974.14974.6	P	4.42575	0.164974	0.621	//11	9//134	1.66675	0.588235	R.LK[425.27]EFK[425.27]EANK[2329.2]IVFDPNTR.Q	Spt15	1	TBP	LKEFKEANKIVFDPNTR	15	//19	14//126	2.759	0.911765	R.DGTK[3049.72]PATTFQSEEDIKR.A	Spt15	1	TBP	DGTKPATTFQSEEDIKR	35	126.128	1.11301e+06	127.131	729691	3.76052e+06	1.21891e+06	805202	0.660593	-0.598166	-0.598166
						-1	5.33375	JL121323_121323_ABP_127_50B.17236.17236.6	P	4.42475	0.133141	0.133	//11	12//134	2.6735	0.735294	R.LK[425.27]EFK[425.27]EANK[2329.2]IVFDPNTR.Q	Spt15	1	TBP	LKEFKEANKIVFDPNTR	15	//19	13//126	1.75125	0.647059	R.DGTK[3049.72]PATTFQSEEDIKR.A	Spt15	1	TBP	DGTKPATTFQSEEDIKR	35	126.127	482090	127.131	323992	1.06955e+06	527863	357519	0.677295	-0.562143	-0.562143
						-1	1.00592	JL121323_121323_ABP_127_30B.10498.10498.3	NP	4.34725	0.183308	0.69	//19	11//68	2.821	0.823529	R.DGTK[1809.98]PATTFQSEEDIKR.A	Spt15	1	TBP	DGTKPATTFQSEEDIKR	35	//14	7//44	1.52625	0.541667	K.EANK[2329.2]IVFDPNTR.Q	Spt15	1	TBP	EANKIVFDPNTR	15	126.127	157012	127.131	106326	1.8023e+06	171910	117329	0.682503	-0.551093	-0.551093
						-2	4.52727	JL121323_121323_ABP_127_50B.16057.16057.6	P	4.312	0.138687	0.392	//11	7//134	1.45325	0.5	R.LK[425.27]EFK[425.27]EANK[2329.2]IVFDPNTR.Q	Spt15	1	TBP	LKEFKEANKIVFDPNTR	15	//19	15//126	2.85875	1.02941	R.DGTK[3049.72]PATTFQSEEDIKR.A	Spt15	1	TBP	DGTKPATTFQSEEDIKR	35	126.127	648104	127.131	430690	1.92958e+06	709700	475259	0.669662	-0.578495	-0.578495
						-2	2.8639	JL121323_121323_ABP_127_30B.13137.13137.6	P	4.19025	0.130355	0.307	//11	8//134	1.89575	0.529412	R.LK[425.27]EFK[425.27]EANK[2329.2]IVFDPNTR.Q	Spt15	1	TBP	LKEFKEANKIVFDPNTR	15	//19	15//126	2.2945	0.970588	R.DGTK[3049.72]PATTFQSEEDIKR.A	Spt15	1	TBP	DGTKPATTFQSEEDIKR	35	126.127	575168	127.131	450366	1.46184e+06	629003	496971	0.790093	-0.339906	-0.339906
						-1	0.64607	JL121323_121323_ABP_127_50B.16399.16399.6	P	3.90775	0.127535	0.408	//11	11//134	2.27425	0.705882	R.LK[425.27]EFK[425.27]EANK[2329.2]IVFDPNTR.Q	Spt15	1	TBP	LKEFKEANKIVFDPNTR	15	//19	11//126	1.6335	0.647059	R.DGTK[3049.72]PATTFQSEEDIKR.A	Spt15	1	TBP	DGTKPATTFQSEEDIKR	35	126.127	596493	127.131	462712	1.13057e+06	652377	510595	0.782669	-0.353526	-0.353526
						0	3.34896	JL121323_121323_ABP_127_30B.11867.11867.4	P	3.69925	0.167088	0.774	//19	11//97	2.578	0.705882	R.DGTK[2511.36]PATTFQSEEDIKR.A	Spt15	1	TBP	DGTKPATTFQSEEDIKR	35	//16	6//88	1.12125	0.333333	K.EFK[425.27]EANK[2329.2]IVFDPNTR.Q	Spt15	1	TBP	EFKEANKIVFDPNTR	15	126.127	410058	127.131	245059	2243787	449364	270419	0.601782	-0.732686	-0.732686
						-1	2.31095	JL121323_121323_ABP_127_30B.12197.12197.5	P	3.68475	0.136447	0.1	1//19	18//126	3.051	1.20588	R.DGTK[2511.36]PATTFQSEEDIKR.A	Spt15	1	TBP	DGTKPATTFQSEEDIKR	35	//16	4//115	0.63375	0.2	K.EFK[425.27]EANK[2329.2]IVFDPNTR.Q	Spt15	1	TBP	EFKEANKIVFDPNTR	15	126.127	1.11715e+06	127.131	733695	3146914	1.22343e+06	809621	0.661761	-0.595618	-0.595618
						-2	1.45864	JL121323_121323_ABP_127_30B.10490.10490.3	N	3.594	0.150512		//14	8//44	1.6035	0.681818	K.EANK[2329.19]IVFDPNTR.Q	Spt15	1	TBP	EANKIVFDPNTR	15	//19	11//68	1.9905	0.65625	R.DGTK[1809.98]PATTFQSEEDIKR.A	Spt15	1	TBP	DGTKPATTFQSEEDIKR	35	126.128	184119	127.131	126840	2.05046e+06	201563	139965	0.694401	-0.526158	-0.526158
						-1	-1.16852	JL121323_121323_ABP_127_50B.19896.19896.6	P	3.5695	0.114268	0.582	//11	13//134	3.12725	0.764706	R.LK[425.27]EFK[425.27]EANK[2329.2]IVFDPNTR.Q	Spt15	1	TBP	LKEFKEANKIVFDPNTR	15	//19	7//126	0.44225	0.323529	R.DGTK[3049.72]PATTFQSEEDIKR.A	Spt15	1	TBP	DGTKPATTFQSEEDIKR	35	126.128	437916	127.131	328598	849194	479078	362602	0.756875	-0.401874	-0.401874
						0	4.77929	JL121323_121323_ABP_127_50B.14765.14765.6	P	2.836	0.116139	0.662	//11	8//134	1.37925	0.529412	R.LK[425.27]EFK[425.27]EANK[2329.2]IVFDPNTR.Q	Spt15	1	TBP	LKEFKEANKIVFDPNTR	15	//19	12//126	1.45675	0.558824	R.DGTK[3049.72]PATTFQSEEDIKR.A	Spt15	1	TBP	DGTKPATTFQSEEDIKR	35	126.127	1.75504e+06	127.131	1.13683e+06	7.75526e+06	1.9222e+06	1.25447e+06	0.652622	-0.61568	-0.61568
						-1	2.66116	JL121323_121323_ABP_127_30B.13360.13360.5	P	2.47525	0.0858791	0.621	//15	8//129	0.317	0.294118	R.DGTK[2511.36]PATTFQSEEDIK[425.27]R.A	Spt15	1	TBP	DGTKPATTFQSEEDIKR	35	//16	8//115	2.15825	0.7	K.EFK[425.27]EANK[2626.38]IVFDPNTR.Q	Spt15	1	TBP	EFKEANKIVFDPNTR	15	126.127	911823	127.131	562543	2.92363e+06	999010	620756	0.621371	-0.686472	-0.686472
						-2	8.7048	JL121323_121323_ABP_127_100B.13098.13098.5	P	1.421	0.046832	0.42	1//19	7//126	0.5345	0.205882	R.DGTK[2511.36]PATTFQSEEDIKR.A	Spt15	1	TBP	DGTKPATTFQSEEDIKR	35	//16	9//115	0.8865	0.433333	K.EFK[425.27]EANK[2329.2]IVFDPNTR.Q	Spt15	1	TBP	EFKEANKIVFDPNTR	15	126.127	168598	127.131	119188	644506	184535	131522	0.712724	-0.488584	-0.488584
						-2	-5.40137	JL121323_121323_ABP_127_100B.13081.13081.5	P	1.32025	0.04761	0.0423	1//19	8//126	0.57925	0.352941	R.DGTK[2511.36]PATTFQSEEDIKR.A	Spt15	1	TBP	DGTKPATTFQSEEDIKR	35	//16	7//115	0.741	0.3	K.EFK[425.27]EANK[2329.2]IVFDPNTR.Q	Spt15	1	TBP	EFKEANKIVFDPNTR	15	126.127	149210	127.131	113347	704007	163218	125077	0.766315	-0.383991	-0.383991
	52	TBP:15---TBP:47	9.24675	-0.36841	0.36841
						-2	1.12431	JL121323_121323_ABP_127_30B.13388.13388.7	N	9.24675	0.373984		//16	15//88	3.9245	1.71429	K.EFK[425.27]EANK[2626.38]IVFDPNTR.Q	Spt15	1	TBP	EFKEANKIVFDPNTR	15	//15	19//98	5.32225	1.59375	R.DGTK[2511.37]PATTFQSEEDIK[425.27]R.A	Spt15	1	TBP	DGTKPATTFQSEEDIKR	47	126.128	616730	127.131	417124	1.34497e+06	675256	460290	0.681652	-0.552892	-0.552892
						-2	0.845942	JL121323_121323_ABP_127_30B.13392.13392.7	N	9.0985	0.368711		1//16	15//88	3.768	1.5	K.EFK[425.27]EANK[2626.38]IVFDPNTR.Q	Spt15	1	TBP	EFKEANKIVFDPNTR	15	//15	17//98	5.3305	1.53125	R.DGTK[2511.37]PATTFQSEEDIK[425.27]R.A	Spt15	1	TBP	DGTKPATTFQSEEDIKR	47	126.128	584923	127.131	372483	1.2478e+06	640711	411029	0.641519	-0.640435	-0.640435
						-2	0.487461	JL121323_121323_ABP_127_50B.13481.13481.6	N	8.7665	0.412901		//14	10//59	3.65925	1.36364	K.EANK[2626.37]IVFDPNTR.Q	Spt15	1	TBP	EANKIVFDPNTR	15	//15	17//98	5.10725	1.46875	R.DGTK[1809.98]PATTFQSEEDIK[425.27]R.A	Spt15	1	TBP	DGTKPATTFQSEEDIKR	47	126.128	516925	127.131	420926	885590	565113	464484	0.821932	-0.282909	-0.282909
						-1	2.97127	JL121323_121323_ABP_127_1ug.13035.13035.6	N	8.746	0.350984		//14	10//59	3.48975	1.36364	K.EANK[2626.37]IVFDPNTR.Q	Spt15	1	TBP	EANKIVFDPNTR	15	//15	19//98	5.25625	1.59375	R.DGTK[1809.97]PATTFQSEEDIK[425.27]R.A	Spt15	1	TBP	DGTKPATTFQSEEDIKR	47	126.127	143732	127.131	112295	523263	157188	123915	0.788324	-0.343139	-0.343139
						-1	5.28768	JL121323_121323_ABP_127_1ug.12974.12974.6	N	8.71375	0.344131		//14	11//59	3.621	1.5	K.EANK[2626.4]IVFDPNTR.Q	Spt15	1	TBP	EANKIVFDPNTR	15	//15	20//98	5.09275	1.71875	R.DGTK[1810]PATTFQSEEDIK[425.27]R.A	Spt15	1	TBP	DGTKPATTFQSEEDIKR	47	126.127	147991	127.131	110820	652149	161905	122288	0.755308	-0.404862	-0.404862
						-1	5.16595	JL121323_121323_ABP_127_50B.13416.13416.5	N	8.1565	0.304438		//14	14//74	4.4805	1.72727	K.EANK[2626.4]IVFDPNTR.Q	Spt15	1	TBP	EANKIVFDPNTR	15	//15	18//129	3.676	1.15625	R.DGTK[1810]PATTFQSEEDIK[425.27]R.A	Spt15	1	TBP	DGTKPATTFQSEEDIKR	47	126.128	750142	127.131	642621	835311	819683	709122	0.865117	-0.209033	-0.209033
						-1	3.0543	JL121323_121323_ABP_127_1ug.12966.12966.5	N	7.874	0.238303		//14	17//74	4.1065	2.04545	K.EANK[2626.39]IVFDPNTR.Q	Spt15	1	TBP	EANKIVFDPNTR	15	//15	21//129	3.7675	1.3125	R.DGTK[1809.99]PATTFQSEEDIK[425.27]R.A	Spt15	1	TBP	DGTKPATTFQSEEDIKR	47	126.127	182697	127.131	145782	650077	199764	160868	0.805291	-0.312418	-0.312418
						0	5.70144	JL121323_121323_ABP_127_1ug.13123.13123.6	NP	7.46675	0.265154	0.587	//14	18//132	4.49	1.29412	R.DGTK[425.27]PATTFQSEEDIK[1809.98]R.A	Spt15	1	TBP	DGTKPATTFQSEEDIKR	47	//14	11//74	2.97675	1.29167	K.EANK[2626.38]IVFDPNTR.Q	Spt15	1	TBP	EANKIVFDPNTR	15	126.127	253243	127.131	172720	766262	277257	190594	0.687425	-0.540726	-0.540726
						-2	4.76687	JL121323_121323_ABP_127_50B.13552.13552.6	N	5.9685	0.266457		//14	9//59	3.298	1.31818	K.EANK[2626.4]IVFDPNTR.Q	Spt15	1	TBP	EANKIVFDPNTR	15	1//14	16//100	2.6705	0.96875	R.DGTK[425.27]PATTFQSEEDIK[1810]R.A	Spt15	1	TBP	DGTKPATTFQSEEDIKR	47	126.127	422429	127.131	346607	734711	461776	382475	0.82827	-0.271826	-0.271826
						-1	1.23261	JL121323_121323_ABP_127_50B.15161.15161.7	N	5.66825	0.212135		//16	9//88	3.166	0.928571	K.EFK[425.27]EANK[2626.37]IVFDPNTR.Q	Spt15	1	TBP	EFKEANKIVFDPNTR	15	//15	12//98	2.50225	0.96875	R.DGTK[2511.36]PATTFQSEEDIK[425.27]R.A	Spt15	1	TBP	DGTKPATTFQSEEDIKR	47	126.128	574462	127.131	440882	968771	628340	486506	0.774272	-0.369087	-0.369087
						-3	3.45779	JL121323_121323_ABP_127_70B.12286.12286.5	N	5.4375	0.228788		//14	12//74	2.6425	1.22727	K.EANK[2626.36]IVFDPNTR.Q	Spt15	1	TBP	EANKIVFDPNTR	15	//15	15//129	2.795	1	R.DGTK[1809.97]PATTFQSEEDIK[425.27]R.A	Spt15	1	TBP	DGTKPATTFQSEEDIKR	47	126.127	207395	127.131	198422	1.02221e+06	226369	218956	0.967252	-0.0480363	-0.0480363
						0	2.14135	JL121323_121323_ABP_127_70B.13791.13791.6	N	5.4315	0.209032		//16	9//88	2.55625	1.03571	K.EFK[425.27]EANK[2626.39]IVFDPNTR.Q	Spt15	1	TBP	EFKEANKIVFDPNTR	15	//15	13//98	2.87525	0.8125	R.DGTK[2511.37]PATTFQSEEDIK[425.27]R.A	Spt15	1	TBP	DGTKPATTFQSEEDIKR	47	126.127	393257	127.13	281955	2.07811e+06	430382	311133	0.722923	-0.468087	-0.468087
						0	3.71572	JL121323_121323_ABP_127_30B.10756.10756.3	NP	5.2605	0.194308	0.0682	//19	12//69	2.2005	0.647059	R.DGTKPATTFQSEEDIK[1809.98]R.A	Spt15	1	TBP	DGTKPATTFQSEEDIKR	47	//14	11//44	3.06	1.08333	K.EANK[2329.2]IVFDPNTR.Q	Spt15	1	TBP	EANKIVFDPNTR	15	126.127	428689	127.131	302937	5025235	469213	334286	0.71244	-0.489159	-0.489159
						-1	2.03851	JL121323_121323_ABP_127_50B.15105.15105.6	N	5.15775	0.224704		//16	9//88	1.50075	0.785714	K.EFK[425.27]EANK[2626.37]IVFDPNTR.Q	Spt15	1	TBP	EFKEANKIVFDPNTR	15	//15	13//98	3.657	0.90625	R.DGTK[2511.36]PATTFQSEEDIK[425.27]R.A	Spt15	1	TBP	DGTKPATTFQSEEDIKR	47	126.127	1.572e+06	127.13	1.06552e+06	6520783	1.72115e+06	1.17578e+06	0.683135	-0.549757	-0.549757
						0	3.00046	JL121323_121323_ABP_127_30B.13575.13575.7	N	4.46075	0.18607		//16	10//88	3.20975	1.03571	K.EFK[425.27]EANK[2626.39]IVFDPNTR.Q	Spt15	1	TBP	EFKEANKIVFDPNTR	15	1//14	10//99	1.251	0.5625	R.DGTK[425.27]PATTFQSEEDIK[2511.38]R.A	Spt15	1	TBP	DGTKPATTFQSEEDIKR	47	126.128	616079	127.131	457942	1.69363e+06	674041	505332	0.749704	-0.415607	-0.415607
						798	-118.796	JL121323_121323_ABP_127_30B.31835.31835.3	P	0.6775	0.0193873	0.77	//15	2//50	0.1055	0.0769231	K.PATTFQSEEDIK[1809.98]R.A	Spt15	1	TBP	PATTFQSEEDIKR	47	//14	4//44	0.572	0.25	K.EANK[1928.01]IVFDPNTR.Q	Spt15	1	TBP	EANKIVFDPNTR	15	126.127	211247	127.131	209364	211247	230485	231030	1.00237	0.00340872	0.00340872
	53	TBP:15---TBP:55	14.194	-0.0245307	0.0245307
						-1	4.79277	JL121323_121323_ABP_127_D.28201.28201.4	N	14.194	0.375374		//14	7//59	1.053	0.590909	K.EANK[3592.91]IVFDPNTR.Q	Spt15	1	TBP	EANKIVFDPNTR	15	//15	34//186	13.141	1.63333	R.AAPESEK[1810]DTSATSGIVPTLQNIVATVTLGC[160.03]R.L	Spt15	1	TBP	AAPESEKDTSATSGIVPTLQNIVATVTLGCR	55	126.127	86007.2	127.131	75539.7	264297	93957.8	83356.8	0.887172	-0.172714	-0.172714
						-1	3.58926	JL121323_121323_ABP_127_30B.31584.31584.4	N	11.4415	0.319194		3//14	10//59	1.761	1.13636	K.EANK[3592.9]IVFDPNTR.Q	Spt15	1	TBP	EANKIVFDPNTR	15	//15	28//186	9.6805	1.26667	R.AAPESEK[1810]DTSATSGIVPTLQNIVATVTLGC[160.03]R.L	Spt15	1	TBP	AAPESEKDTSATSGIVPTLQNIVATVTLGCR	55	126.127	61729.3	127.13	63382.7	137128	67324.2	69941.7	1.03888	0.0550275	0.0550275
						0	-0.703407	JL121323_121323_ABP_127_30B.31617.31617.5	NP	10.7372	0.285881	0.000546	//15	29//255	8.801	1.01613	R.AAPESEK[1809.98]DTSATSGIVPTLQNIVATVTLGC[160.03]R.L	Spt15	1	TBP	AAPESEKDTSATSGIVPTLQNIVATVTLGCR	55	1//14	10//74	1.93625	1	K.EANK[3592.89]IVFDPNTR.Q	Spt15	1	TBP	EANKIVFDPNTR	15	126.127	143759	127.131	144641	203403	156825	159609	1.01775	0.0253813	0.0253813
						-2	22.7075	JL121323_121323_ABP_127_30B.28570.28570.5	P	7.1265	0.240119	0.726	//15	18//255	6.65	0.725806	R.AAPESEK[1809.98]DTSATSGIVPTLQNIVATVTLGC[160.03]R.L	Spt15	1	TBP	AAPESEKDTSATSGIVPTLQNIVATVTLGCR	55	1//14	4//74	0.4765	0.25	K.EANK[3592.89]IVFDPNTR.Q	Spt15	1	TBP	EANKIVFDPNTR	15	126.128	288287	127.131	247710	687905	315003	273344	0.867752	-0.204646	-0.204646
						-2	11.0416	JL121323_121323_ABP_127_50B.32680.32680.4	N	6.9525	0.177825		//14	6//59	1.577	0.727273	K.EANK[3592.83]IVFDPNTR.Q	Spt15	1	TBP	EANKIVFDPNTR	15	//15	18//186	5.3755	0.683333	R.AAPESEK[1809.93]DTSATSGIVPTLQNIVATVTLGC[160.03]R.L	Spt15	1	TBP	AAPESEKDTSATSGIVPTLQNIVATVTLGCR	55	126.127	69554.5	127.131	68865.1	109575	75889.7	75991.5	1.00134	0.00193513	0.00193513
						-1	-1.3626	JL121323_121323_ABP_127_30B.28217.28217.8	P	6.31075	0.229386	0.432	//	17//371	3.98225	0.454545	K.PATTFQSEEDIKRAAPESEK[2511.36]DTSATSGIVPTLQNIVATVTLGC[160.03]R.L	Spt15	1	TBP	PATTFQSEEDIKRAAPESEKDTSATSGIVPTLQNIVATVTLGCR	55	1//16	10//115	2.3285	0.766667	K.EFK[425.27]EANK[5095.62]IVFDPNTR.Q	Spt15	1	TBP	EFKEANKIVFDPNTR	15	126.127	65400.4	127.131	71560	501140	71274.5	78965.2	1.1079	0.147832	0.147832
	54	TBP:15---TBP:8	5.64675	-0.335178	0.335178
						0	1.37694	JL121323_121323_ABP_127_30B.10012.10012.3	NP	5.64675	0.202244	0.0222	//14	13//50	3.19175	1.25	K.EANK[1070.66]IVFDPNTR.Q	Spt15	1	TBP	EANKIVFDPNTR	15	//5	6//15	2.455	1.6	R.LK[1809.98]EFK.E	Spt15	1	TBP	LKEFK	8	126.127	1.53624e+06	127.131	1.07396e+06	4510251	1.6816e+06	1.1851e+06	0.704749	-0.504819	-0.504819
						0	5.82716	JL121323_121323_ABP_127_30B.09891.09891.3	NP	5.6455	0.192079	0.0265	//14	12//50	3.175	1.5	K.EANK[1070.66]IVFDPNTR.Q	Spt15	1	TBP	EANKIVFDPNTR	15	//5	6//15	2.4705	1.6	R.LK[1809.98]EFK.E	Spt15	1	TBP	LKEFK	8	126.128	937023	127.131	652022	2.34281e+06	1.02572e+06	719495	0.701453	-0.511582	-0.511582
						0	4.36411	JL121323_121323_ABP_127_30B.09873.09873.4	P	5.64525	0.283247	0.00737	//14	18//65	4.91575	2.08333	K.EANK[1070.66]IVFDPNTR.Q	Spt15	1	TBP	EANKIVFDPNTR	15	//5	3//20	0.7295	0.8	R.LK[1809.98]EFK.E	Spt15	1	TBP	LKEFK	8	126.128	274533	127.131	221992	1.1822e+06	300144	244965	0.816157	-0.293081	-0.293081
						0	3.94772	JL121323_121323_ABP_127_1ug.11015.11015.4	P	5.5495	0.282023	0.727	//14	19//65	4.86725	2.25	K.EANK[1070.66]IVFDPNTR.Q	Spt15	1	TBP	EANKIVFDPNTR	15	1//5	4//20	0.68225	0.9	R.LK[1809.98]EFK.E	Spt15	1	TBP	LKEFK	8	126.127	130940	127.131	120208	485138	142981	132648	0.92773	-0.108222	-0.108222
						-1	5.301	JL121323_121323_ABP_127_30B.10135.10135.4	P	5.48125	0.296036	0.0163	//14	19//65	4.76075	2.125	K.EANK[1070.66]IVFDPNTR.Q	Spt15	1	TBP	EANKIVFDPNTR	15	1//5	4//20	0.7205	0.9	R.LK[1809.98]EFK.E	Spt15	1	TBP	LKEFK	8	126.128	550525	127.131	476924	1612729	601496	526278	0.874948	-0.192732	-0.192732
						0	-0.424421	JL121323_121323_ABP_127_50B.11262.11262.4	P	5.31725	0.305457	0.104	//14	17//65	4.56225	2.04167	K.EANK[1070.66]IVFDPNTR.Q	Spt15	1	TBP	EANKIVFDPNTR	15	1//5	4//20	0.755	0.9	R.LK[1809.98]EFK.E	Spt15	1	TBP	LKEFK	8	126.128	462622	127.131	474761	735226	504555	523891	1.03832	0.0542558	0.0542558
						0	4.65605	JL121323_121323_ABP_127_30B.09914.09914.3	NP	5.25175	0.187372	0.0234	//14	10//50	2.79225	1.04167	K.EANK[1070.66]IVFDPNTR.Q	Spt15	1	TBP	EANKIVFDPNTR	15	//5	6//15	2.4595	1.6	R.LK[1809.98]EFK.E	Spt15	1	TBP	LKEFK	8	126.128	1.38162e+06	127.131	878752	3.69413e+06	1.51341e+06	969689	0.640733	-0.642205	-0.642205
						-785	147.708	JL121323_121323_ABP_127_30B.10294.10294.4	P	5.21675	0.228045	0.328	//14	12//65	3.29875	1.125	K.EANK[1070.66]IVFDPNTR.Q	Spt15	1	TBP	EANKIVFDPNTR	15	//5	6//20	1.918	1.6	R.LK[1809.98]EFK.E	Spt15	1	TBP	LKEFK	8	126.128	929141	127.131	839003	2.53173e+06	1.01475e+06	925826	0.912366	-0.132315	-0.132315
						0	3.73952	JL121323_121323_ABP_127_30B.09908.09908.4	P	5.0355	0.222063	0.00185	//14	17//65	4.4715	1.79167	K.EANK[1070.66]IVFDPNTR.Q	Spt15	1	TBP	EANKIVFDPNTR	15	//5	3//20	0.564	0.8	R.LK[1809.98]EFK.E	Spt15	1	TBP	LKEFK	8	126.128	554691	127.131	369699	3825501	607396	407956	0.671648	-0.574222	-0.574222
						-1	6.70067	JL121323_121323_ABP_127_30B.10026.10026.5	P	4.93775	0.166655	0.00162	//14	16//80	4.56975	1.875	K.EANK[1070.66]IVFDPNTR.Q	Spt15	1	TBP	EANKIVFDPNTR	15	//5	2//25	0.368	0.4	R.LK[1809.98]EFK.E	Spt15	1	TBP	LKEFK	8	126.128	259892	127.131	157445	1.27691e+06	284778	173738	0.610083	-0.712922	-0.712922
						-1	4.54334	JL121323_121323_ABP_127_1ug.10863.10863.3	N	4.86175	0.161961		//5	6//15	2.34	2	R.LK[1809.97]EFK.E	Spt15	1	TBP	LKEFK	8	1//14	14//50	2.52175	1.40909	K.EANK[1070.65]IVFDPNTR.Q	Spt15	1	TBP	EANKIVFDPNTR	15	126.127	234313	127.13	166541	876300	256450	183775	0.716611	-0.480738	-0.480738
						0	0.49379	JL121323_121323_ABP_127_30B.09934.09934.5	P	4.7725	0.184766	0.000622	//14	17//80	4.4655	2.04167	K.EANK[1070.66]IVFDPNTR.Q	Spt15	1	TBP	EANKIVFDPNTR	15	//5	2//25	0.307	0.4	R.LK[1809.98]EFK.E	Spt15	1	TBP	LKEFK	8	126.128	203892	127.131	133500	1.00302e+06	223294	147316	0.659738	-0.600036	-0.600036
						0	2.17804	JL121323_121323_ABP_127_50B.11329.11329.4	P	4.62375	0.259128	0.359	//14	15//65	4.0865	1.70833	K.EANK[1070.66]IVFDPNTR.Q	Spt15	1	TBP	EANKIVFDPNTR	15	1//5	4//20	0.53725	0.9	R.LK[1809.98]EFK.E	Spt15	1	TBP	LKEFK	8	126.128	466239	127.131	477966	597845	508507	527428	1.03721	0.0527066	0.0527066
						0	1.59984	JL121323_121323_ABP_127_1ug.10771.10771.5	P	4.585	0.164163	0.228	//14	16//80	4.2865	1.875	K.EANK[1070.66]IVFDPNTR.Q	Spt15	1	TBP	EANKIVFDPNTR	15	//5	2//25	0.2985	0.4	R.LK[1809.98]EFK.E	Spt15	1	TBP	LKEFK	8	126.128	284195	127.131	172344	1.50099e+06	311405	190179	0.610713	-0.711434	-0.711434
						-1	4.87894	JL121323_121323_ABP_127_1ug.10857.10857.5	P	4.52425	0.157865	0.187	//14	16//80	4.15925	1.875	K.EANK[1070.66]IVFDPNTR.Q	Spt15	1	TBP	EANKIVFDPNTR	15	//5	3//25	0.365	0.5	R.LK[1809.98]EFK.E	Spt15	1	TBP	LKEFK	8	126.128	122275	127.131	78333.2	590647	133932	86439.4	0.645399	-0.631737	-0.631737
						0	3.50199	JL121323_121323_ABP_127_30B.10239.10239.3	N	4.25975	0.180181		//5	5//15	1.6675	1.5	R.LK[1809.99]EFK.E	Spt15	1	TBP	LKEFK	8	//14	10//50	2.59225	1.18182	K.EANK[1070.67]IVFDPNTR.Q	Spt15	1	TBP	EANKIVFDPNTR	15	126.128	1.32896e+06	127.131	1.15813e+06	2.06491e+06	1.45192e+06	1.27797e+06	0.880196	-0.184104	-0.184104
						0	1.92515	JL121323_121323_ABP_127_30B.10259.10259.5	P	3.698	0.137787	0.00178	//14	14//80	3.42075	1.58333	K.EANK[1070.66]IVFDPNTR.Q	Spt15	1	TBP	EANKIVFDPNTR	15	1//5	3//25	0.27725	0.5	R.LK[1809.98]EFK.E	Spt15	1	TBP	LKEFK	8	126.128	126705	127.131	103472	333420	138513	114180	0.824324	-0.278716	-0.278716
						0	6.03896	JL121323_121323_ABP_127_30B.31542.31542.4	P	2.362	0.0657673	0.723	1//14	7//59	1.58675	0.75	K.EANK[1817.94]IVFDPNTR.Q	Spt15	1	TBP	EANKIVFDPNTR	15	//14	6//60	0.77525	0.363636	-.M[147.04]ADEERLK[1809.98]EFK.E	Spt15	1	TBP	MADEERLKEFK	8	126.128	127443	127.131	122124	127443	139100	134762	0.968812	-0.0457111	-0.0457111
						-1	-7.32406	JL121323_121323_ABP_127_30B.25852.25852.4	P	1.58425	0.0514258	0.738	//15	8//65	0.977	0.625	K.E[111.03]ANK[1512.87]IVFDPNTR.Q	Spt15	1	TBP	EANKIVFDPNTR	15	1//9	5//40	0.60725	0.388889	R.LK[1791.97]EFKEANK.I	Spt15	1	TBP	LKEFKEANK	8	126.128	304744	127.131	279745	412282	332768	308694	0.927657	-0.108337	-0.108337
						-1	-14.6577	JL121323_121323_ABP_127_30B.25993.25993.4	P	1.53125	0.0412008	0.764	1//14	9//61	1.2995	0.666667	K.EANK[1512.87]IVFDPNTR.Q	Spt15	1	TBP	EANKIVFDPNTR	15	//9	4//40	0.23175	0.333333	R.LK[1809.98]EFKEANK.I	Spt15	1	TBP	LKEFKEANK	8	126.127	425180	127.131	393186	567504	464245	433874	0.934581	-0.0976083	-0.0976083
	55	TBP:15---TBP:83	7.94425	-0.19227	0.19227
						0	10.8174	JL121323_121323_ABP_127_30B.10481.10481.5	N	7.94425	0.249545		1//13	10//62	3.77775	1.3	R.LDLK[1809.95]TVALHAR.N	Spt15	1	TBP	LDLKTVALHAR	83	//14	17//75	4.1665	2.09091	K.EANK[1642.97]IVFDPNTR.Q	Spt15	1	TBP	EANKIVFDPNTR	15	126.128	880508	127.131	548217	1685227	964641	604948	0.627123	-0.67318	-0.67318
						-1	2.70757	JL121323_121323_ABP_127_30B.14665.14665.6	N	7.85675	0.354315		2//13	11//50	3.35825	1.55	R.LDLK[1809.99]TVALHAR.N	Spt15	1	TBP	LDLKTVALHAR	83	//14	12//60	4.4985	1.54545	K.EANK[1643]IVFDPNTR.Q	Spt15	1	TBP	EANKIVFDPNTR	15	126.128	103710	127.131	55001.1	995288	113736	60692.8	0.533629	-0.906091	-0.906091
						-1	2.37411	JL121323_121323_ABP_127_30B.14599.14599.6	N	7.12875	0.31756		1//13	9//50	2.946	1.25	R.LDLK[1809.97]TVALHAR.N	Spt15	1	TBP	LDLKTVALHAR	83	//14	11//60	4.18275	1.36364	K.EANK[1642.99]IVFDPNTR.Q	Spt15	1	TBP	EANKIVFDPNTR	15	126.128	85310.5	127.131	54893.1	899674	93440.3	60573.7	0.648261	-0.625354	-0.625354
						0	2.76193	JL121323_121323_ABP_127_30B.14595.14595.5	NP	6.99575	0.285139	5.65e-06	//14	14//75	4.12625	1.625	K.EANK[1643]IVFDPNTR.Q	Spt15	1	TBP	EANKIVFDPNTR	15	1//13	10//62	2.8695	1.31818	R.LDLK[1809.98]TVALHAR.N	Spt15	1	TBP	LDLKTVALHAR	83	126.127	375386	127.131	281850	2.21455e+06	410669	311017	0.757342	-0.400983	-0.400983
						0	8.05143	JL121323_121323_ABP_127_30B.14633.14633.4	N	6.56825	0.216935		1//13	8//50	1.46425	0.8	R.LDLK[1809.96]TVALHAR.N	Spt15	1	TBP	LDLKTVALHAR	83	//14	12//60	5.104	1.63636	K.EANK[1642.97]IVFDPNTR.Q	Spt15	1	TBP	EANKIVFDPNTR	15	126.128	1178772	127.131	979474	1.93817e+06	1.28842e+06	1.08083e+06	0.838884	-0.253456	-0.253456
						-3	14.4989	JL121323_121323_ABP_127_30B.14142.14142.4	N	5.3645	0.165403		//13	7//50	1.31275	0.9	R.LDLK[1791.93]TVALHAR.N	Spt15	1	TBP	LDLKTVALHAR	83	//13	10//54	4.05175	1.35	K.E[111.03]ANK[1642.95]IVFDPNTR.Q	Spt15	1	TBP	EANKIVFDPNTR	15	126.128	998773	127.131	833071	1.16855e+06	1.09164e+06	919280	0.842111	-0.247918	-0.247918
						-1	18.6663	JL121323_121323_ABP_127_50B.19822.19822.4	N	5.175	0.189706		//13	6//50	0.901	0.65	R.LDLK[1791.92]TVALHAR.N	Spt15	1	TBP	LDLKTVALHAR	83	//13	12//54	4.274	1.55	K.E[111.03]ANK[1642.94]IVFDPNTR.Q	Spt15	1	TBP	EANKIVFDPNTR	15	126.128	584634	127.131	533515	588781	638434	588725	0.922139	-0.116944	-0.116944
						-2	1.92257	JL121323_121323_ABP_127_30B.45950.45950.4	NP	4.645	0.232413	0.363	//15	8//64	3.298	1.04167	K.E[111.03]ANK[1643]IVFDPNTR.Q	Spt15	1	TBP	EANKIVFDPNTR	15	//13	7//50	1.347	0.818182	R.LDLK[1791.97]TVALHAR.N	Spt15	1	TBP	LDLKTVALHAR	83	126.128	34713.1	127.131	30274.1	53170.7	37924.6	33407	0.880879	-0.182984	-0.182984
						0	-0.940154	JL121323_121323_ABP_127_50B.22028.22028.4	P	4.602	0.126118	0.786	//15	13//64	4.436	1.45833	K.E[111.03]ANK[1643]IVFDPNTR.Q	Spt15	1	TBP	EANKIVFDPNTR	15	//13	2//50	0.166	0.0909091	R.LDLK[1791.97]TVALHAR.N	Spt15	1	TBP	LDLKTVALHAR	83	126.127	985969	127.13	1.02945e+06	1.64284e+06	1.07513e+06	1.13599e+06	1.05661	0.079439	0.079439
						-2	-1.36114	JL121323_121323_ABP_127_50B.23346.23346.4	P	3.97575	0.136755	0.615	//15	9//64	3.6475	1.08333	K.E[111.03]ANK[1643]IVFDPNTR.Q	Spt15	1	TBP	EANKIVFDPNTR	15	//13	4//50	0.32825	0.181818	R.LDLK[1791.97]TVALHAR.N	Spt15	1	TBP	LDLKTVALHAR	83	126.128	472943	127.131	471338	472943	515982	520113	1.00801	0.0115046	0.0115046
						0	6.3119	JL121323_121323_ABP_127_30B.43880.43880.4	N	3.9425	0.16005		1//13	8//50	1.21275	0.8	R.LDLK[1791.95]TVALHAR.N	Spt15	1	TBP	LDLKTVALHAR	83	//13	9//54	2.72975	1.1	K.E[111.03]ANK[1642.98]IVFDPNTR.Q	Spt15	1	TBP	EANKIVFDPNTR	15	126.127	45864	127.131	40333.3	54094.8	50103.1	44507.1	0.888311	-0.170864	-0.170864
						-2	10.7341	JL121323_121323_ABP_127_30B.46329.46329.4	N	3.81675	0.201183		1//13	8//50	1.22775	0.8	R.LDLK[1791.94]TVALHAR.N	Spt15	1	TBP	LDLKTVALHAR	83	//13	9//54	2.589	1.1	K.E[111.03]ANK[1642.97]IVFDPNTR.Q	Spt15	1	TBP	EANKIVFDPNTR	15	126.127	28598	127.131	25048.3	38844.1	31242.5	27640.4	0.884705	-0.176732	-0.176732
						1	0.575405	JL121323_121323_ABP_127_30B.22187.22187.4	P	3.589	0.106999	0.125	//15	11//64	3.24475	1.29167	K.E[111.03]ANK[1643]IVFDPNTR.Q	Spt15	1	TBP	EANKIVFDPNTR	15	//13	6//50	0.34425	0.363636	R.LDLK[1791.97]TVALHAR.N	Spt15	1	TBP	LDLKTVALHAR	83	126.127	509812	127.131	481610	658583	556528	531448	0.954936	-0.0665248	-0.0665248
						-7	-1.69793	JL121323_121323_ABP_127_50B.23999.23999.4	P	3.5325	0.115606	0.769	1//15	11//64	3.386	1.41667	K.E[111.03]ANK[1643]IVFDPNTR.Q	Spt15	1	TBP	EANKIVFDPNTR	15	//13	3//50	0.1465	0.136364	R.LDLK[1791.97]TVALHAR.N	Spt15	1	TBP	LDLKTVALHAR	83	126.127	690977	127.131	685984	1.39903e+06	753891	756972	1.00409	0.00588482	0.00588482
						-1	2.84874	JL121323_121323_ABP_127_50B.21974.21974.4	P	3.47325	0.0979553	0.574	//15	10//64	3.2225	0.958333	K.E[111.03]ANK[1643]IVFDPNTR.Q	Spt15	1	TBP	EANKIVFDPNTR	15	//13	4//50	0.25075	0.272727	R.LDLK[1791.97]TVALHAR.N	Spt15	1	TBP	LDLKTVALHAR	83	126.128	901517	127.131	964594	1.44926e+06	982754	1.06441e+06	1.08309	0.115157	0.115157
						2	-0.434968	JL121323_121323_ABP_127_30B.22126.22126.4	P	3.4125	0.110244	0.0536	//15	7//64	3.0945	1	K.E[111.03]ANK[1643]IVFDPNTR.Q	Spt15	1	TBP	EANKIVFDPNTR	15	//13	4//50	0.318	0.272727	R.LDLK[1791.97]TVALHAR.N	Spt15	1	TBP	LDLKTVALHAR	83	126.128	696775	127.131	599160	992840	761341	661163	0.868418	-0.203538	-0.203538
						0	4.4485	JL121323_121323_ABP_127_50B.23331.23331.4	P	3.102	0.111057	0.414	//15	9//64	2.8495	1.08333	K.E[111.03]ANK[1643]IVFDPNTR.Q	Spt15	1	TBP	EANKIVFDPNTR	15	//13	3//50	0.2525	0.136364	R.LDLK[1791.97]TVALHAR.N	Spt15	1	TBP	LDLKTVALHAR	83	126.128	421534	127.131	456872	456872	459448	504151	1.0973	0.133955	0.133955
						0	1.50158	JL121323_121323_ABP_127_30B.21454.21454.4	P	2.54025	0.0909441	0.725	//15	8//64	2.3795	0.791667	K.E[111.03]ANK[1643]IVFDPNTR.Q	Spt15	1	TBP	EANKIVFDPNTR	15	//13	3//50	0.16075	0.136364	R.LDLK[1791.97]TVALHAR.N	Spt15	1	TBP	LDLKTVALHAR	83	126.128	574576	127.131	584830	663765	626716	645350	1.02973	0.0422697	0.0422697
						-1	8.82678	JL121323_121323_ABP_127_30B.24140.24140.4	P	2.5015	0.072281	0.661	//15	9//64	2.28075	0.916667	K.E[111.03]ANK[1643]IVFDPNTR.Q	Spt15	1	TBP	EANKIVFDPNTR	15	2//13	5//50	0.22075	0.227273	R.LDLK[1791.97]TVALHAR.N	Spt15	1	TBP	LDLKTVALHAR	83	126.128	564508	127.131	520635	564508	616390	574513	0.932061	-0.101504	-0.101504
						-1	-2.7925	JL121323_121323_ABP_127_30B.47012.47012.4	P	2.496	0.115652	0.0363	//15	9//64	2.22925	0.916667	K.E[111.03]ANK[1643]IVFDPNTR.Q	Spt15	1	TBP	EANKIVFDPNTR	15	//13	3//50	0.26675	0.136364	R.LDLK[1791.97]TVALHAR.N	Spt15	1	TBP	LDLKTVALHAR	83	126.127	25158.8	127.131	23107.5	35667.9	27472.3	25498.8	0.928165	-0.107547	-0.107547
	56	TBP:15---TBP:97	7.42375	-0.577291	0.577291
						0	3.54972	JL121323_121323_ABP_127_30B.10385.10385.5	NP	7.42375	0.253444	0.123	//16	28//115	6.43875	2.5	K.EFK[425.27]EANK[1397.75]IVFDPNTR.Q	Spt15	1	TBP	EFKEANKIVFDPNTR	15	//10	5//41	0.985	0.75	R.NAEYNPK[2511.36]R.F	Spt15	1	TBP	NAEYNPKR	97	126.128	1.72081e+06	127.131	944149	3348808	1.88678e+06	1.04185e+06	0.552187	-0.856771	-0.856771
						0	9.33888	JL121323_121323_ABP_127_50B.11807.11807.5	P	4.58725	0.172453	0.688	//16	23//115	4.09475	1.8	K.EFK[425.27]EANK[1397.75]IVFDPNTR.Q	Spt15	1	TBP	EFKEANKIVFDPNTR	15	//10	5//41	0.4925	0.5625	R.NAEYNPK[2511.36]R.F	Spt15	1	TBP	NAEYNPKR	97	126.128	1.10728e+06	127.131	892459	1.87314e+06	1.21061e+06	984814	0.813486	-0.297811	-0.297811
	57	TBP:151---TBP:83	7.389	-0.21433	0.21433
						-1	0.109633	JL121323_121323_ABP_127_30B.20450.20450.5	N	7.389	0.29698		1//13	13//63	3.8055	1.6	R.LDLK[1650.92]TVALHAR.N	Spt15	1	TBP	LDLKTVALHAR	83	//13	16//64	3.5835	2	K.IGFAAK[1643]FTDFK.I	Spt15	1	TBP	IGFAAKFTDFK	151	126.128	106276	127.131	90712.3	601254	116132	100100	0.861946	-0.21433	-0.21433
	58	TBP:151---TBP:97	3.3115	-0.0882599	0.0882599
						0	5.47524	JL121323_121323_ABP_127_30B.12592.12592.4	P	3.3115	0.119147	0.379	//13	9//53	2.0325	1.09091	K.IGFAAK[1397.75]FTDFK.I	Spt15	1	TBP	IGFAAKFTDFK	151	//10	7//35	1.279	1.0625	R.NAEYNPK[1650.92]R.F	Spt15	1	TBP	NAEYNPKR	97	126.127	1230545	127.131	1.14527e+06	1.2478e+06	1.34351e+06	1.26379e+06	0.940657	-0.0882599	-0.0882599
	59	TBP:167---TBP:35	8.85	-0.339507	0.339507
						-1	5.12613	JL121323_121323_ABP_127_1ug.14327.14327.5	N	8.85	0.272236		//17	13//105	4.3855	1.28571	K.IQNIVGSC[160.03]DVK[2329.22]FPIR.L	Spt15	1	TBP	IQNIVGSCDVKFPIR	167	//19	18//126	4.4645	1.40625	R.DGTK[2152.21]PATTFQSEEDIKR.A	Spt15	1	TBP	DGTKPATTFQSEEDIKR	35	126.128	202078	127.131	175979	366488	220777	194189	0.879572	-0.185126	-0.185126
						-3	4.42465	JL121323_121323_ABP_127_70B.14155.14155.4	N	8.32275	0.246403		//17	14//82	4.199	1.32143	K.IQNIVGSC[160.03]DVK[2329.22]FPIR.L	Spt15	1	TBP	IQNIVGSCDVKFPIR	167	//19	17//97	4.12375	1.28125	R.DGTK[2152.21]PATTFQSEEDIKR.A	Spt15	1	TBP	DGTKPATTFQSEEDIKR	35	126.127	210178	127.131	153792	336744	229981	169707	0.737916	-0.438471	-0.438471
						-1	3.2415	JL121323_121323_ABP_127_30B.14090.14090.5	NP	6.02375	0.197238	0.426	//19	14//126	1.60975	0.676471	R.DGTK[2152.19]PATTFQSEEDIKR.A	Spt15	1	TBP	DGTKPATTFQSEEDIKR	35	//17	14//105	4.414	1.2	K.IQNIVGSC[160.03]DVK[2329.2]FPIR.L	Spt15	1	TBP	IQNIVGSCDVKFPIR	167	126.128	944991	127.131	712487	944991	1.03378e+06	786218	0.76053	-0.394923	-0.394923
	60	TBP:167---TBP:55	20.5308	-0.210403	0.210403
						0	4.07133	JL121323_121323_ABP_127_50B.33663.33663.5	NP	20.5308	0.468204	0.00171	//15	48//255	17.4582	2.16129	R.AAPESEK[2152.19]DTSATSGIVPTLQNIVATVTLGC[160.03]R.L	Spt15	1	TBP	AAPESEKDTSATSGIVPTLQNIVATVTLGCR	55	2//17	15//105	3.0725	1.1	K.IQNIVGSC[160.03]DVK[3592.89]FPIR.L	Spt15	1	TBP	IQNIVGSCDVKFPIR	167	126.127	113967	127.131	83946.3	1.13879e+06	124698	92633.4	0.74286	-0.428837	-0.428837
						0	-2.38143	JL121323_121323_ABP_127_D.28767.28767.4	NP	20.5252	0.538473	0.00617	//15	42//186	17.775	2.17742	R.AAPESEK[2152.19]DTSATSGIVPTLQNIVATVTLGC[160.03]R.L	Spt15	1	TBP	AAPESEKDTSATSGIVPTLQNIVATVTLGCR	55	1//17	13//82	2.75025	0.966667	K.IQNIVGSC[160.03]DVK[3592.89]FPIR.L	Spt15	1	TBP	IQNIVGSCDVKFPIR	167	126.127	111390	127.131	80480.2	813872	121898	88808.6	0.728551	-0.456898	-0.456898
						0	2.66546	JL121323_121323_ABP_127_D.28781.28781.5	NP	19.116	0.448128	5.45e-05	//15	47//255	16.1715	2.1129	R.AAPESEK[2152.19]DTSATSGIVPTLQNIVATVTLGC[160.03]R.L	Spt15	1	TBP	AAPESEKDTSATSGIVPTLQNIVATVTLGCR	55	2//17	14//105	2.9445	1.06667	K.IQNIVGSC[160.03]DVK[3592.89]FPIR.L	Spt15	1	TBP	IQNIVGSCDVKFPIR	167	126.128	158957	127.131	104941	1.74154e+06	174072	115800	0.665243	-0.588046	-0.588046
						0	1.02527	JL121323_121323_ABP_127_70B.28947.28947.5	NP	18.5568	0.418425	6.08e-11	//15	45//255	15.057	1.93548	R.AAPESEK[2152.19]DTSATSGIVPTLQNIVATVTLGC[160.03]R.L	Spt15	1	TBP	AAPESEKDTSATSGIVPTLQNIVATVTLGCR	55	3//17	15//105	3.49975	1.1	K.IQNIVGSC[160.03]DVK[3592.89]FPIR.L	Spt15	1	TBP	IQNIVGSCDVKFPIR	167	126.128	65307.1	127.131	53076.9	684638	71396.2	58569.5	0.820345	-0.285698	-0.285698
						0	2.66546	JL121323_121323_ABP_127_30B.32662.32662.5	NP	18.2407	0.434159	0.00891	//15	43//255	15.4195	1.80645	R.AAPESEK[2152.19]DTSATSGIVPTLQNIVATVTLGC[160.03]R.L	Spt15	1	TBP	AAPESEKDTSATSGIVPTLQNIVATVTLGCR	55	1//17	12//105	2.82125	0.833333	K.IQNIVGSC[160.03]DVK[3592.89]FPIR.L	Spt15	1	TBP	IQNIVGSCDVKFPIR	167	126.128	122861	127.131	112852	963572	134158	124531	0.92824	-0.10743	-0.10743
						-1	5.30402	JL121323_121323_ABP_127_30B.32657.32657.4	NP	17.3292	0.495037	0.0155	//15	36//186	14.8087	1.75806	R.AAPESEK[2152.19]DTSATSGIVPTLQNIVATVTLGC[160.03]R.L	Spt15	1	TBP	AAPESEKDTSATSGIVPTLQNIVATVTLGCR	55	1//17	11//82	2.5205	0.7	K.IQNIVGSC[160.03]DVK[3592.89]FPIR.L	Spt15	1	TBP	IQNIVGSCDVKFPIR	167	126.127	48406.9	127.131	38362.6	191767	52932.2	42332.5	0.79975	-0.322378	-0.322378
						0	-3.97476	JL121323_121323_ABP_127_30B.32684.32684.4	NP	16.8855	0.452518	0.00169	//15	37//186	14.1635	1.66129	R.AAPESEK[2152.19]DTSATSGIVPTLQNIVATVTLGC[160.03]R.L	Spt15	1	TBP	AAPESEKDTSATSGIVPTLQNIVATVTLGCR	55	2//17	13//82	2.722	0.933333	K.IQNIVGSC[160.03]DVK[3592.89]FPIR.L	Spt15	1	TBP	IQNIVGSCDVKFPIR	167	126.127	68048.1	127.131	55026.7	420916	74396.2	60721.1	0.816186	-0.293031	-0.293031
						-1	0.805222	JL121323_121323_ABP_127_50B.33637.33637.4	NP	16.1112	0.386	0.000728	//15	32//186	14.13	1.59677	R.AAPESEK[2152.19]DTSATSGIVPTLQNIVATVTLGC[160.03]R.L	Spt15	1	TBP	AAPESEKDTSATSGIVPTLQNIVATVTLGCR	55	//17	9//82	1.98125	0.633333	K.IQNIVGSC[160.03]DVK[3592.89]FPIR.L	Spt15	1	TBP	IQNIVGSCDVKFPIR	167	126.127	36602.6	127.131	32466.4	131935	39982.4	35826.2	0.896049	-0.158351	-0.158351
						0	5.11657	JL121323_121323_ABP_127_50B.33709.33709.4	NP	15.828	0.43705	0.00598	//15	36//186	13.3438	1.51613	R.AAPESEK[2152.19]DTSATSGIVPTLQNIVATVTLGC[160.03]R.L	Spt15	1	TBP	AAPESEKDTSATSGIVPTLQNIVATVTLGCR	55	1//17	10//82	2.48425	0.766667	K.IQNIVGSC[160.03]DVK[3592.89]FPIR.L	Spt15	1	TBP	IQNIVGSCDVKFPIR	167	126.127	63219.3	127.13	52003.3	422627	69106.2	57384.8	0.830385	-0.268147	-0.268147
						-3	1.58762	JL121323_121323_ABP_127_30B.32623.32623.5	NP	15.763	0.402708	0.0198	//15	30//255	13.187	1.41935	R.AAPESEK[2152.19]DTSATSGIVPTLQNIVATVTLGC[160.03]R.L	Spt15	1	TBP	AAPESEKDTSATSGIVPTLQNIVATVTLGCR	55	2//17	14//105	2.576	0.866667	K.IQNIVGSC[160.03]DVK[3592.89]FPIR.L	Spt15	1	TBP	IQNIVGSCDVKFPIR	167	126.127	78435.8	127.131	73767	241705	85627.3	81400.7	0.95064	-0.0730289	-0.0730289
						-2	6.43789	JL121323_121323_ABP_127_30B.32638.32638.5	NP	15.367	0.394086	0.00416	//15	34//255	13.0687	1.46774	R.AAPESEK[2152.19]DTSATSGIVPTLQNIVATVTLGC[160.03]R.L	Spt15	1	TBP	AAPESEKDTSATSGIVPTLQNIVATVTLGCR	55	1//17	12//105	2.29825	0.733333	K.IQNIVGSC[160.03]DVK[3592.89]FPIR.L	Spt15	1	TBP	IQNIVGSCDVKFPIR	167	126.127	97547.6	127.131	86433.5	478026	106556	95378	0.895098	-0.159882	-0.159882
						-2	2.80605	JL121323_121323_ABP_127_50B.33610.33610.5	NP	15.1367	0.405963	0.0409	//15	33//255	12.4042	1.43548	R.AAPESEK[2152.19]DTSATSGIVPTLQNIVATVTLGC[160.03]R.L	Spt15	1	TBP	AAPESEKDTSATSGIVPTLQNIVATVTLGCR	55	1//17	12//105	2.7325	0.833333	K.IQNIVGSC[160.03]DVK[3592.89]FPIR.L	Spt15	1	TBP	IQNIVGSCDVKFPIR	167	126.127	64048.7	127.13	60590.2	206674	69916.8	66860.3	0.956283	-0.0644899	-0.0644899
						-1	4.60113	JL121323_121323_ABP_127_D.28936.28936.4	N	13.0388	0.332384		//17	8//82	1.3935	0.571429	K.IQNIVGSC[160.03]DVK[3592.86]FPIR.L	Spt15	1	TBP	IQNIVGSCDVKFPIR	167	//15	31//186	11.6453	1.45	R.AAPESEK[2152.17]DTSATSGIVPTLQNIVATVTLGC[160.03]R.L	Spt15	1	TBP	AAPESEKDTSATSGIVPTLQNIVATVTLGCR	55	126.127	36704.5	127.13	36437.9	91489.9	40046.4	40208.6	1.00405	0.00583124	0.00583124
						-1	2.52978	JL121323_121323_ABP_127_D.28927.28927.5	N	12.9923	0.355353		1//17	12//105	1.8895	0.785714	K.IQNIVGSC[160.03]DVK[3592.9]FPIR.L	Spt15	1	TBP	IQNIVGSCDVKFPIR	167	//15	30//255	11.1028	1.28333	R.AAPESEK[2152.2]DTSATSGIVPTLQNIVATVTLGC[160.03]R.L	Spt15	1	TBP	AAPESEKDTSATSGIVPTLQNIVATVTLGCR	55	126.128	73073.4	127.131	64479.1	183444	79824.8	71151.6	0.891347	-0.165941	-0.165941
						0	-1.90364	JL121323_121323_ABP_127_70B.28905.28905.5	NP	11.7055	0.2959	2.15e-09	//15	31//255	9.3375	1.32258	R.AAPESEK[2152.19]DTSATSGIVPTLQNIVATVTLGC[160.03]R.L	Spt15	1	TBP	AAPESEKDTSATSGIVPTLQNIVATVTLGCR	55	1//17	14//105	2.368	0.966667	K.IQNIVGSC[160.03]DVK[3592.89]FPIR.L	Spt15	1	TBP	IQNIVGSCDVKFPIR	167	126.127	34857.2	127.131	29958.4	102221	38087.5	33058.6	0.867964	-0.204293	-0.204293
						-1	2.92696	JL121323_121323_ABP_127_30B.34404.34404.6	NP	9.568	0.263723	0.637	//15	23//255	6.64175	0.806452	R.AAPESEK[3087.67]DTSATSGIVPTLQNIVATVTLGC[160.03]R.L	Spt15	1	TBP	AAPESEKDTSATSGIVPTLQNIVATVTLGCR	55	//12	17//159	2.92625	0.875	K.FTDFK[425.27]IQNIVGSC[160.03]DVK[3592.89]FPIR.L	Spt15	1	TBP	FTDFKIQNIVGSCDVKFPIR	167	126.128	40538.1	127.131	36476.7	114137	44274.9	40251.4	0.909126	-0.137448	-0.137448
						-2	7.32624	JL121323_121323_ABP_127_30B.34411.34411.6	N	8.4085	0.224802		//12	13//118	2.13675	0.657895	K.FTDFK[425.27]IQNIVGSC[160.03]DVK[3592.84]FPIR.L	Spt15	1	TBP	FTDFKIQNIVGSCDVKFPIR	167	//15	19//186	6.27175	0.883333	R.AAPESEK[3087.63]DTSATSGIVPTLQNIVATVTLGC[160.03]R.L	Spt15	1	TBP	AAPESEKDTSATSGIVPTLQNIVATVTLGCR	55	126.127	37367.7	127.131	36184.7	109227	40781.1	39929.3	0.979112	-0.0304536	-0.0304536
						3071	66.5489	JL121323_121323_ABP_127_30B.34393.34393.3	P	8.349	0.230632	0.0447	//15	16//117	6.53575	0.774194	R.AAPESEK[3087.67]DTSATSGIVPTLQNIVATVTLGC[160.03]R.L	Spt15	1	TBP	AAPESEKDTSATSGIVPTLQNIVATVTLGCR	55	//12	14//77	1.81325	0.675	K.FTDFK[425.27]IQNIVGSC[160.03]DVK[3592.89]FPIR.L	Spt15	1	TBP	FTDFKIQNIVGSCDVKFPIR	167	126.127	142178	127.131	135962	142178	155187	150032	0.966785	-0.0487333	-0.0487333
	61	TBP:167---TBP:83	7.6005	-0.361548	0.361548
						0	4.4119	JL121323_121323_ABP_127_30B.19138.19138.5	NP	7.6005	0.245931	0.000201	//17	16//105	5.12425	1.4	K.IQNIVGSC[160.03]DVK[1643]FPIR.L	Spt15	1	TBP	IQNIVGSCDVKFPIR	167	//13	11//62	2.47625	1.22727	R.LDLK[2152.19]TVALHAR.N	Spt15	1	TBP	LDLKTVALHAR	83	126.128	431853	127.131	324745	853614	472438	358351	0.758514	-0.398752	-0.398752
						-1	3.77531	JL121323_121323_ABP_127_30B.19118.19118.5	NP	7.42725	0.263219	0.00114	//17	15//105	5.05675	1.26667	K.IQNIVGSC[160.03]DVK[1643]FPIR.L	Spt15	1	TBP	IQNIVGSCDVKFPIR	167	//13	10//62	2.3705	1.09091	R.LDLK[2152.19]TVALHAR.N	Spt15	1	TBP	LDLKTVALHAR	83	126.128	351115	127.131	298686	577687	383691	329595	0.859013	-0.219249	-0.219249
						-2	6.07421	JL121323_121323_ABP_127_30B.19151.19151.6	NP	6.04275	0.230082	0.00196	//17	17//105	3.1075	1.5	K.IQNIVGSC[160.03]DVK[1643]FPIR.L	Spt15	1	TBP	IQNIVGSCDVKFPIR	167	//13	10//62	2.93525	1.22727	R.LDLK[2152.19]TVALHAR.N	Spt15	1	TBP	LDLKTVALHAR	83	126.128	150161	127.131	109781	640673	164310	121142	0.737272	-0.43973	-0.43973
						-1	0.667019	JL121323_121323_ABP_127_30B.19269.19269.6	N	4.857	0.174533		//13	7//50	2.43675	1.05	R.LDLK[2152.19]TVALHAR.N	Spt15	1	TBP	LDLKTVALHAR	83	//17	11//82	2.42025	1.03571	K.IQNIVGSC[160.03]DVK[1642.99]FPIR.L	Spt15	1	TBP	IQNIVGSCDVKFPIR	167	126.128	104444	127.131	79097	479038	114252	87282.2	0.763943	-0.388463	-0.388463
	62	TBP:199---TBP:218	2.498	-0.419189	0.419189
						0	1.72146	JL121323_121323_ABP_127_30B.06235.06235.4	P	2.498	0.0907341	0.224	//11	10//44	2.062	1.11111	K.IVLTGAK[1024.62]QR.E	Spt15	1	TBP	IVLTGAKQR	218	//8	3//26	0.436	0.5	R.M[147.04]VK[1391.87]PK.I	Spt15	1	TBP	MVKPK	199	126.128	107152	127.131	74666.9	368325	117293	82393.7	0.702458	-0.509515	-0.509515
						0	1.72852	JL121323_121323_ABP_127_30B.06225.06225.3	P	2.1165	0.0917306	0.697	//11	6//35	1.25925	0.722222	K.IVLTGAK[1024.62]QR.E	Spt15	1	TBP	IVLTGAKQR	218	//8	5//20	0.85725	0.7	R.M[147.04]VK[1391.87]PK.I	Spt15	1	TBP	MVKPK	199	126.127	72582.5	127.131	57266.2	373203	79371	63192.3	0.796164	-0.328863	-0.328863
	63	TBP:199---TBP:35	14.1352	-0.278396	0.278396
						0	1.65365	JL121323_121323_ABP_127_30B.06839.06839.4	P	14.1352	0.496636	0.00651	//19	34//104	13.5798	2.97059	R.DGTK[1024.62]PATTFQSEEDIKR.A	Spt15	1	TBP	DGTKPATTFQSEEDIKR	35	//8	5//22	0.5555	0.7	R.M[147.04]VK[2329.2]PK.I	Spt15	1	TBP	MVKPK	199	126.128	66282.1	127.131	46801.8	640944	72548.1	51645	0.711873	-0.490309	-0.490309
						0	1.58916	JL121323_121323_ABP_127_30B.07415.07415.4	P	13.416	0.440649	0.000424	//19	35//104	12.736	3.26471	R.DGTK[1008.62]PATTFQSEEDIKR.A	Spt15	1	TBP	DGTKPATTFQSEEDIKR	35	//7	6//19	0.68	1	R.MVK[2329.2]PK.I	Spt15	1	TBP	MVKPK	199	126.128	113392	127.131	95394.9	537979	123925	105267	0.849436	-0.235423	-0.235423
						0	3.41246	JL121323_121323_ABP_127_30B.06849.06849.3	P	11.9808	0.434605	8.4e-05	//19	27//75	11.196	2.29412	R.DGTK[1024.62]PATTFQSEEDIKR.A	Spt15	1	TBP	DGTKPATTFQSEEDIKR	35	//8	5//16	0.78475	0.7	R.M[147.04]VK[2329.2]PK.I	Spt15	1	TBP	MVKPK	199	126.128	78221.2	127.131	49428.7	1.03623e+06	85686.3	54543.8	0.636551	-0.651651	-0.651651
						0	2.9442	JL121323_121323_ABP_127_30B.07421.07421.3	P	11.553	0.545236	6.77e-05	//19	25//75	10.8305	2.41176	R.DGTK[1008.62]PATTFQSEEDIKR.A	Spt15	1	TBP	DGTKPATTFQSEEDIKR	35	//7	5//14	0.7225	0.7	R.MVK[2329.2]PK.I	Spt15	1	TBP	MVKPK	199	126.127	54418.4	127.131	41335.1	595041	59527.4	45612.6	0.766246	-0.38412	-0.38412
						1123	-165.868	JL121323_121323_ABP_127_30B.06870.06870.3	P	11.089	0.388461	0.0105	//19	23//75	10.6445	2.23529	R.DGTK[1024.62]PATTFQSEEDIKR.A	Spt15	1	TBP	DGTKPATTFQSEEDIKR	35	//8	3//16	0.4445	0.5	R.M[147.04]VK[2329.2]PK.I	Spt15	1	TBP	MVKPK	199	126.128	234108	127.131	193620	592069	255895	213657	0.834939	-0.260258	-0.260258
						0	1.41019	JL121323_121323_ABP_127_30B.07413.07413.5	P	11.0795	0.435918	0.000182	//19	32//133	10.9087	2.82353	R.DGTK[1008.62]PATTFQSEEDIKR.A	Spt15	1	TBP	DGTKPATTFQSEEDIKR	35	//7	2//24	0.17075	0.2	R.MVK[2329.2]PK.I	Spt15	1	TBP	MVKPK	199	126.128	107746	127.131	76748.6	253479	117924	84690.8	0.718184	-0.477575	-0.477575
						0	0.874055	JL121323_121323_ABP_127_30B.07043.07043.4	P	11.072	0.429305	0.0339	//19	27//104	10.9032	2.44118	R.DGTK[1024.62]PATTFQSEEDIKR.A	Spt15	1	TBP	DGTKPATTFQSEEDIKR	35	//8	2//22	0.16875	0.2	R.M[147.04]VK[2329.2]PK.I	Spt15	1	TBP	MVKPK	199	126.128	53859.8	127.131	40569.8	267248	58920.6	44768.2	0.759805	-0.396298	-0.396298
						0	2.36357	JL121323_121323_ABP_127_30B.06847.06847.5	P	10.3618	0.400733	0.000208	//19	30//133	9.9715	2.67647	R.DGTK[1024.62]PATTFQSEEDIKR.A	Spt15	1	TBP	DGTKPATTFQSEEDIKR	35	//8	4//28	0.39025	0.6	R.M[147.04]VK[2329.2]PK.I	Spt15	1	TBP	MVKPK	199	126.128	121314	127.131	91034.9	455178	132718	100456	0.756912	-0.401802	-0.401802
						0	5.02248	JL121323_121323_ABP_127_30B.06855.06855.6	P	10.1937	0.389647	0.000103	//19	21//133	9.78125	1.94118	R.DGTK[1024.62]PATTFQSEEDIKR.A	Spt15	1	TBP	DGTKPATTFQSEEDIKR	35	1//8	5//28	0.4125	0.7	R.M[147.04]VK[2329.2]PK.I	Spt15	1	TBP	MVKPK	199	126.127	45442.3	127.131	37370.7	52714.8	49674	41237.9	0.830171	-0.26852	-0.26852
						0	3.77118	JL121323_121323_ABP_127_50B.06905.06905.5	P	8.79	0.344301	0.00926	//19	25//133	8.441	2.29412	R.DGTK[1024.62]PATTFQSEEDIKR.A	Spt15	1	TBP	DGTKPATTFQSEEDIKR	35	1//8	4//28	0.349	0.6	R.M[147.04]VK[2329.2]PK.I	Spt15	1	TBP	MVKPK	199	126.127	186831	127.131	183386	186831	203867	202364	0.992624	-0.0106802	-0.0106802
						0	-0.81036	JL121323_121323_ABP_127_30B.07054.07054.3	P	8.73575	0.496632	0.000853	//19	18//75	8.022	1.55882	R.DGTK[1024.62]PATTFQSEEDIKR.A	Spt15	1	TBP	DGTKPATTFQSEEDIKR	35	//8	4//16	0.71375	0.6	R.M[147.04]VK[2329.2]PK.I	Spt15	1	TBP	MVKPK	199	126.127	27389.5	127.131	22348.2	269206	29942.1	24660.8	0.823616	-0.279957	-0.279957
						0	2.24306	JL121323_121323_ABP_127_50B.06897.06897.3	P	8.20025	0.332748	0.43	//19	21//75	7.5755	1.5	R.DGTK[1024.62]PATTFQSEEDIKR.A	Spt15	1	TBP	DGTKPATTFQSEEDIKR	35	//8	3//16	0.62475	0.5	R.M[147.04]VK[2329.2]PK.I	Spt15	1	TBP	MVKPK	199	126.127	74138.7	127.13	67241.6	450084	80966.4	74200	0.91643	-0.125904	-0.125904
						0	4.85866	JL121323_121323_ABP_127_30B.07196.07196.4	P	6.96125	0.23279	0.0213	//19	21//104	6.40275	1.5	R.DGTK[1024.62]PATTFQSEEDIKR.A	Spt15	1	TBP	DGTKPATTFQSEEDIKR	35	//8	5//22	0.5585	0.7	R.M[147.04]VK[2329.2]PK.I	Spt15	1	TBP	MVKPK	199	126.127	59419.9	127.131	56670.5	212200	64858.3	62535	0.964179	-0.0526269	-0.0526269
						701	-123.619	JL121323_121323_ABP_127_30B.07104.07104.3	P	6.1795	0.200653	0.524	//19	15//75	6.03375	1.17647	R.DGTK[1024.62]PATTFQSEEDIKR.A	Spt15	1	TBP	DGTKPATTFQSEEDIKR	35	//8	2//16	0.14575	0.2	R.M[147.04]VK[2329.2]PK.I	Spt15	1	TBP	MVKPK	199	126.128	97100.5	127.131	81526.2	322649	106122	89962.8	0.847728	-0.238326	-0.238326
						700	-122.211	JL121323_121323_ABP_127_30B.07119.07119.3	P	6.0595	0.180007	0.0291	//19	20//75	5.70675	1.61765	R.DGTK[1024.62]PATTFQSEEDIKR.A	Spt15	1	TBP	DGTKPATTFQSEEDIKR	35	//8	3//16	0.35275	0.5	R.M[147.04]VK[2329.2]PK.I	Spt15	1	TBP	MVKPK	199	126.128	98659.6	127.131	81768.9	307408	107839	90230.6	0.836715	-0.257192	-0.257192
						0	2.6884	JL121323_121323_ABP_127_30B.07155.07155.5	P	5.736	0.186068	0.00722	//19	18//133	5.60025	1.35294	R.DGTK[1024.62]PATTFQSEEDIKR.A	Spt15	1	TBP	DGTKPATTFQSEEDIKR	35	//8	2//28	0.13575	0.2	R.M[147.04]VK[2329.2]PK.I	Spt15	1	TBP	MVKPK	199	126.128	117851	127.132	91199.9	132111	128895	100638	0.78077	-0.35703	-0.35703
						-2	-1.02433	JL121323_121323_ABP_127_30B.06724.06724.4	P	5.39675	0.268997	0.696	//19	20//104	5.14275	1.58824	R.DGTK[1008.62]PATTFQSEEDIKR.A	Spt15	1	TBP	DGTKPATTFQSEEDIKR	35	//7	3//19	0.254	0.5	R.MVK[2329.2]PK.I	Spt15	1	TBP	MVKPK	199	126.128	27075.4	127.131	29770	76496.6	29505.5	32850.7	1.11338	0.15494	0.15494
	64	TBP:199---TBP:47	7.2065	-0.608084	0.608084
						0	2.58203	JL121323_121323_ABP_127_30B.08191.08191.5	P	7.2065	0.222708	0.0244	1//14	25//136	6.86925	1.76471	R.DGTK[425.27]PATTFQSEEDIK[1024.62]R.A	Spt15	1	TBP	DGTKPATTFQSEEDIKR	47	//8	5//28	0.33725	0.7	R.M[147.04]VK[2626.38]PK.I	Spt15	1	TBP	MVKPK	199	126.128	334168	127.131	217592	334168	365982	240109	0.656067	-0.608084	-0.608084
	65	TBP:199---TBP:55	16.2288	-0.00192092	0.00192092
						0	5.27928	JL121323_121323_ABP_127_70B.26738.26738.5	P	16.2288	0.506413	3.95e-05	//15	46//260	15.9787	2.33871	R.AAPESEK[1024.62]DTSATSGIVPTLQNIVATVTLGC[160.03]R.L	Spt15	1	TBP	AAPESEKDTSATSGIVPTLQNIVATVTLGCR	55	//8	4//28	0.25	0.6	R.M[147.04]VK[3592.89]PK.I	Spt15	1	TBP	MVKPK	199	126.127	88404.2	127.131	77474.7	306591	96578.5	85492	0.885208	-0.175912	-0.175912
						-1	5.59652	JL121323_121323_ABP_127_30B.29019.29019.4	P	14.974	0.463584	0.42	//15	40//191	14.551	1.83871	R.AAPESEK[1024.62]DTSATSGIVPTLQNIVATVTLGC[160.03]R.L	Spt15	1	TBP	AAPESEKDTSATSGIVPTLQNIVATVTLGCR	55	//8	4//22	0.423	0.8	R.M[147.04]VK[3592.89]PK.I	Spt15	1	TBP	MVKPK	199	126.128	217879	127.131	224051	528293	237622	247236	1.04046	0.0572194	0.0572194
						0	-2.05876	JL121323_121323_ABP_127_70B.26745.26745.4	P	14.0135	0.464292	0.000125	//15	39//191	13.802	1.77419	R.AAPESEK[1024.62]DTSATSGIVPTLQNIVATVTLGC[160.03]R.L	Spt15	1	TBP	AAPESEKDTSATSGIVPTLQNIVATVTLGCR	55	//8	2//22	0.2115	0.4	R.M[147.04]VK[3592.89]PK.I	Spt15	1	TBP	MVKPK	199	126.127	115396	127.131	106203	370600	126005	117193	0.930069	-0.10459	-0.10459
						-2	3.74251	JL121323_121323_ABP_127_50B.30366.30366.4	P	10.987	0.360673	0.0952	//15	34//191	10.558	1.51613	R.AAPESEK[1024.62]DTSATSGIVPTLQNIVATVTLGC[160.03]R.L	Spt15	1	TBP	AAPESEKDTSATSGIVPTLQNIVATVTLGCR	55	//8	4//22	0.429	0.8	R.M[147.04]VK[3592.89]PK.I	Spt15	1	TBP	MVKPK	199	126.128	195991	127.131	201901	222823	213747	222794	1.04233	0.0598077	0.0598077
						0	9.24149	JL121323_121323_ABP_127_30B.28960.28960.5	P	8.78975	0.258123	0.801	//15	33//260	8.63825	1.32258	R.AAPESEK[1024.62]DTSATSGIVPTLQNIVATVTLGC[160.03]R.L	Spt15	1	TBP	AAPESEKDTSATSGIVPTLQNIVATVTLGCR	55	//8	2//28	0.1515	0.4	R.M[147.04]VK[3592.89]PK.I	Spt15	1	TBP	MVKPK	199	126.127	198921	127.13	218557	575405	216776	241174	1.11255	0.15387	0.15387
	66	TBP:218---TBP:35	12.1475	-0.178327	0.178327
						0	1.54768	JL121323_121323_ABP_127_30B.08579.08579.4	P	12.1475	0.428159	0.178	//19	30//101	11.6805	2.61765	R.DGTK[1391.87]PATTFQSEEDIKR.A	Spt15	1	TBP	DGTKPATTFQSEEDIKR	35	1//11	4//37	0.467	0.333333	K.IVLTGAK[2329.2]QR.E	Spt15	1	TBP	IVLTGAKQR	218	126.128	222748	127.131	201988	743311	243262	222891	0.916257	-0.126175	-0.126175
						0	2.19491	JL121323_121323_ABP_127_30B.08582.08582.5	NP	7.91425	0.299108	0.318	//19	20//130	6.56475	1.64706	R.DGTK[1391.87]PATTFQSEEDIKR.A	Spt15	1	TBP	DGTKPATTFQSEEDIKR	35	//11	4//46	1.3495	0.5	K.IVLTGAK[2329.2]QR.E	Spt15	1	TBP	IVLTGAKQR	218	126.128	217889	127.131	183930	284324	238122	202963	0.852352	-0.230479	-0.230479
	67	TBP:35---TBP:35	28.363	-0.289908	0.289908
						0	3.52127	JL121323_121323_ABP_127_30B.08822.08822.5	NP	28.363	0.988499	0.000221	//19	34//126	14.1815	2.97059	R.DGTK[2329.2]PATTFQSEEDIKR.A	Spt15	1	TBP	DGTKPATTFQSEEDIKR	35	//19	34//126	14.1815	2.97059	R.DGTK[2329.2]PATTFQSEEDIKR.A	Spt15	1	TBP	DGTKPATTFQSEEDIKR	35	126.127	165183	127.131	132354	2.1628e+06	180607	146050	0.808662	-0.306391	-0.306391
						0	7.81748	JL121323_121323_ABP_127_30B.08810.08810.4	NP	27.1755	0.971873	0.000965	//19	31//97	13.5877	2.67647	R.DGTK[2329.2]PATTFQSEEDIKR.A	Spt15	1	TBP	DGTKPATTFQSEEDIKR	35	//19	31//97	13.5877	2.67647	R.DGTK[2329.2]PATTFQSEEDIKR.A	Spt15	1	TBP	DGTKPATTFQSEEDIKR	35	126.127	74838.6	127.131	53980.4	811832	81899.7	59566.5	0.727311	-0.459356	-0.459356
						-1	4.64633	JL121323_121323_ABP_127_30B.08787.08787.5	NP	24.0955	0.831209	0.000187	//19	28//126	12.0478	2.38235	R.DGTK[2329.2]PATTFQSEEDIKR.A	Spt15	1	TBP	DGTKPATTFQSEEDIKR	35	//19	28//126	12.0478	2.38235	R.DGTK[2329.2]PATTFQSEEDIKR.A	Spt15	1	TBP	DGTKPATTFQSEEDIKR	35	126.128	90256.5	127.131	78791.3	413354	98605.8	86944.9	0.881742	-0.181572	-0.181572
						0	3.81734	JL121323_121323_ABP_127_30B.09121.09121.5	NP	20.5155	0.626542	0.00238	//19	26//126	10.2577	2.32353	R.DGTK[2329.2]PATTFQSEEDIKR.A	Spt15	1	TBP	DGTKPATTFQSEEDIKR	35	//19	26//126	10.2577	2.32353	R.DGTK[2329.2]PATTFQSEEDIKR.A	Spt15	1	TBP	DGTKPATTFQSEEDIKR	35	126.127	259218	127.131	238063	1210487	283055	262699	0.928085	-0.10767	-0.10767
						2209	-23.6401	JL121323_121323_ABP_127_30B.09984.09984.3	P	16.1077	0.549406	0.000824	//15	13//67	5.83475	1.20588	R.DGTK[2329.2]PATTFQSEEDIK[425.27]R.A	Spt15	1	TBP	DGTKPATTFQSEEDIKR	35	//19	22//68	10.273	2.23529	R.DGTK[2626.38]PATTFQSEEDIKR.A	Spt15	1	TBP	DGTKPATTFQSEEDIKR	35	126.127	776054	127.131	568200	776054	849172	626999	0.738365	-0.437594	-0.437594
						2210	-24.7447	JL121323_121323_ABP_127_30B.09965.09965.3	P	15.9172	0.501181	0.000123	//15	12//67	5.6955	1.11765	R.DGTK[2329.2]PATTFQSEEDIK[425.27]R.A	Spt15	1	TBP	DGTKPATTFQSEEDIKR	35	//19	20//68	10.2218	1.94118	R.DGTK[2626.38]PATTFQSEEDIKR.A	Spt15	1	TBP	DGTKPATTFQSEEDIKR	35	126.127	670888	127.131	526720	670888	733666	581227	0.792223	-0.336022	-0.336022
						-1	4.64488	JL121323_121323_ABP_127_30B.09041.09041.4	N	10.1945	0.405453		//19	18//97	5.09725	1.3125	R.DGTK[2329.22]PATTFQSEEDIKR.A	Spt15	1	TBP	DGTKPATTFQSEEDIKR	35	//19	18//97	5.09725	1.3125	R.DGTK[2329.22]PATTFQSEEDIKR.A	Spt15	1	TBP	DGTKPATTFQSEEDIKR	35	126.128	120270	127.131	106424	921794	131379	117438	0.893887	-0.161836	-0.161836
						0	15.2303	JL121323_121323_ABP_127_30B.08313.08313.5	N	9.1295	0.315998		//19	14//126	4.56475	1.15625	R.DGTK[2329.26]PATTFQSEEDIKR.A	Spt15	1	TBP	DGTKPATTFQSEEDIKR	35	//19	14//126	4.56475	1.15625	R.DGTK[2329.26]PATTFQSEEDIKR.A	Spt15	1	TBP	DGTKPATTFQSEEDIKR	35	126.128	169878	127.131	112533	722103	186027	124178	0.667525	-0.583106	-0.583106
						-1	1.41532	JL121323_121323_ABP_127_30B.09173.09173.5	N	8.941	0.332354		//19	17//126	4.4705	1.1875	R.DGTK[2329.21]PATTFQSEEDIKR.A	Spt15	1	TBP	DGTKPATTFQSEEDIKR	35	//19	17//126	4.4705	1.1875	R.DGTK[2329.21]PATTFQSEEDIKR.A	Spt15	1	TBP	DGTKPATTFQSEEDIKR	35	126.127	223523	127.13	215681	1.10043e+06	243950	238000	0.975611	-0.0356218	-0.0356218
	68	TBP:35---TBP:47	14.4285	-0.362022	0.362022
						-2	2.76131	JL121323_121323_ABP_127_30B.10030.10030.5	N	14.4285	0.454427		//19	31//126	12.964	2.75	R.DGTK[2626.39]PATTFQSEEDIKR.A	Spt15	1	TBP	DGTKPATTFQSEEDIKR	35	3//14	15//131	1.4645	0.59375	R.DGTK[425.27]PATTFQSEEDIK[2329.21]R.A	Spt15	1	TBP	DGTKPATTFQSEEDIKR	47	126.128	240624	127.131	183036	1.18984e+06	263212	201977	0.767354	-0.382036	-0.382036
						-2	2.48528	JL121323_121323_ABP_127_30B.10015.10015.5	N	14.1952	0.477898		//19	32//126	12.7487	2.90625	R.DGTK[2626.39]PATTFQSEEDIKR.A	Spt15	1	TBP	DGTKPATTFQSEEDIKR	35	//15	12//129	1.4465	0.84375	R.DGTK[2329.21]PATTFQSEEDIK[425.27]R.A	Spt15	1	TBP	DGTKPATTFQSEEDIKR	47	126.128	225381	127.131	181289	1.13298e+06	246419	200049	0.811827	-0.300757	-0.300757
						-3	5.08603	JL121323_121323_ABP_127_30B.10054.10054.7	N	10.119	0.382795		//19	20//97	6.38425	1.8125	R.DGTK[2626.35]PATTFQSEEDIKR.A	Spt15	1	TBP	DGTKPATTFQSEEDIKR	35	//15	13//98	3.73475	1.28125	R.DGTK[2329.18]PATTFQSEEDIK[425.27]R.A	Spt15	1	TBP	DGTKPATTFQSEEDIKR	47	126.128	380628	127.131	285336	837047	416409	314863	0.75614	-0.403275	-0.403275
	69	TBP:35---TBP:55	18.2787	-0.273027	0.273027
						-1	5.86962	JL121323_121323_ABP_127_30B.29025.29025.4	NP	18.2787	0.526902	0.00222	//15	38//186	15.8473	1.72581	R.AAPESEK[2329.2]DTSATSGIVPTLQNIVATVTLGC[160.03]R.L	Spt15	1	TBP	AAPESEKDTSATSGIVPTLQNIVATVTLGCR	55	//19	13//97	2.4315	0.823529	R.DGTK[3592.89]PATTFQSEEDIKR.A	Spt15	1	TBP	DGTKPATTFQSEEDIKR	35	126.128	56418.3	127.131	49432.2	279510	61635.1	54547.6	0.885008	-0.176237	-0.176237
						0	1.21026	JL121323_121323_ABP_127_50B.30391.30391.5	NP	17.9745	0.484038	0.000387	//15	46//255	15.263	2.06452	R.AAPESEK[2329.2]DTSATSGIVPTLQNIVATVTLGC[160.03]R.L	Spt15	1	TBP	AAPESEKDTSATSGIVPTLQNIVATVTLGCR	55	//19	17//126	2.7115	1.32353	R.DGTK[3592.89]PATTFQSEEDIKR.A	Spt15	1	TBP	DGTKPATTFQSEEDIKR	35	126.127	204908	127.131	154243	1.4366e+06	224163	170205	0.75929	-0.397278	-0.397278
						0	2.96897	JL121323_121323_ABP_127_D.26526.26526.4	NP	17.894	0.534189	0.293	//15	40//186	15.4062	1.79032	R.AAPESEK[2329.2]DTSATSGIVPTLQNIVATVTLGC[160.03]R.L	Spt15	1	TBP	AAPESEKDTSATSGIVPTLQNIVATVTLGCR	55	//19	14//97	2.48775	1	R.DGTK[3592.89]PATTFQSEEDIKR.A	Spt15	1	TBP	DGTKPATTFQSEEDIKR	35	126.127	131929	127.131	80547.5	1363326	144555	88882.9	0.614875	-0.701636	-0.701636
						0	4.26953	JL121323_121323_ABP_127_30B.29077.29077.5	NP	17.533	0.483336	0.000323	//15	43//255	15.2767	1.95161	R.AAPESEK[2329.2]DTSATSGIVPTLQNIVATVTLGC[160.03]R.L	Spt15	1	TBP	AAPESEKDTSATSGIVPTLQNIVATVTLGCR	55	//19	15//126	2.25625	1.26471	R.DGTK[3592.89]PATTFQSEEDIKR.A	Spt15	1	TBP	DGTKPATTFQSEEDIKR	35	126.127	337099	127.131	246518	3391545	368863	272028	0.737478	-0.439327	-0.439327
						0	0.303805	JL121323_121323_ABP_127_70B.26765.26765.5	P	16.393	0.442426	0.0108	//15	45//255	15.452	2.09677	R.AAPESEK[2329.2]DTSATSGIVPTLQNIVATVTLGC[160.03]R.L	Spt15	1	TBP	AAPESEKDTSATSGIVPTLQNIVATVTLGCR	55	//19	11//126	0.941	0.470588	R.DGTK[3592.89]PATTFQSEEDIKR.A	Spt15	1	TBP	DGTKPATTFQSEEDIKR	35	126.127	151728	127.131	121120	1.60238e+06	165901	133654	0.805624	-0.311822	-0.311822
						0	4.26953	JL121323_121323_ABP_127_D.26467.26467.5	P	15.925	0.441307	0.209	//15	41//255	14.947	1.93548	R.AAPESEK[2329.2]DTSATSGIVPTLQNIVATVTLGC[160.03]R.L	Spt15	1	TBP	AAPESEKDTSATSGIVPTLQNIVATVTLGCR	55	//19	11//126	0.978	0.382353	R.DGTK[3592.89]PATTFQSEEDIKR.A	Spt15	1	TBP	DGTKPATTFQSEEDIKR	35	126.127	67280.9	127.13	63733.4	226534	73444	70328.7	0.957583	-0.0625306	-0.0625306
						0	5.3888	JL121323_121323_ABP_127_30B.29062.29062.6	NP	15.382	0.443752	0.000231	//15	36//255	13.0237	1.67742	R.AAPESEK[2329.2]DTSATSGIVPTLQNIVATVTLGC[160.03]R.L	Spt15	1	TBP	AAPESEKDTSATSGIVPTLQNIVATVTLGCR	55	//19	20//126	2.35825	1.58824	R.DGTK[3592.89]PATTFQSEEDIKR.A	Spt15	1	TBP	DGTKPATTFQSEEDIKR	35	126.127	319744	127.131	258354	3.11513e+06	349575	285090	0.815534	-0.294184	-0.294184
						-1	1.97188	JL121323_121323_ABP_127_50B.30374.30374.4	NP	14.4985	0.499759	0.0103	//15	30//186	12.7427	1.51613	R.AAPESEK[2329.2]DTSATSGIVPTLQNIVATVTLGC[160.03]R.L	Spt15	1	TBP	AAPESEKDTSATSGIVPTLQNIVATVTLGCR	55	//19	9//97	1.75575	0.558824	R.DGTK[3592.89]PATTFQSEEDIKR.A	Spt15	1	TBP	DGTKPATTFQSEEDIKR	35	126.128	50719	127.131	45916.8	251263	55390.9	50668.5	0.914743	-0.128561	-0.128561
						-1	3.77098	JL121323_121323_ABP_127_D.26478.26478.5	NP	14.2538	0.370444	0.00103	//15	40//255	12.738	1.64516	R.AAPESEK[2329.2]DTSATSGIVPTLQNIVATVTLGC[160.03]R.L	Spt15	1	TBP	AAPESEKDTSATSGIVPTLQNIVATVTLGCR	55	//19	15//126	1.51575	0.823529	R.DGTK[3592.89]PATTFQSEEDIKR.A	Spt15	1	TBP	DGTKPATTFQSEEDIKR	35	126.128	77234.1	127.131	69416.6	276301	84354.5	76600	0.908072	-0.139121	-0.139121
						-1	4.35406	JL121323_121323_ABP_127_50B.30749.30749.5	P	14.1918	0.396379	0.378	//15	37//255	13.5322	1.67742	R.AAPESEK[2626.38]DTSATSGIVPTLQNIVATVTLGC[160.03]R.L	Spt15	1	TBP	AAPESEKDTSATSGIVPTLQNIVATVTLGCR	55	//15	11//129	0.6595	0.382353	R.DGTK[3592.89]PATTFQSEEDIK[425.27]R.A	Spt15	1	TBP	DGTKPATTFQSEEDIKR	35	126.128	153126	127.131	113463	505406	167537	125205	0.747326	-0.42019	-0.42019
						-1	5.85741	JL121323_121323_ABP_127_70B.27093.27093.5	P	13.1613	0.398451	0.0626	//15	34//255	12.6632	1.5	R.AAPESEK[2626.38]DTSATSGIVPTLQNIVATVTLGC[160.03]R.L	Spt15	1	TBP	AAPESEKDTSATSGIVPTLQNIVATVTLGCR	55	//15	8//129	0.498	0.294118	R.DGTK[3592.89]PATTFQSEEDIK[425.27]R.A	Spt15	1	TBP	DGTKPATTFQSEEDIKR	35	126.127	133026	127.13	92550.5	782924	145618	102128	0.701342	-0.511811	-0.511811
						0	3.24091	JL121323_121323_ABP_127_70B.26685.26685.4	P	12.4942	0.434394	3.21e-05	//15	26//186	10.864	1.16129	R.AAPESEK[2329.2]DTSATSGIVPTLQNIVATVTLGC[160.03]R.L	Spt15	1	TBP	AAPESEKDTSATSGIVPTLQNIVATVTLGCR	55	//19	9//97	1.63025	0.470588	R.DGTK[3592.89]PATTFQSEEDIKR.A	Spt15	1	TBP	DGTKPATTFQSEEDIKR	35	126.128	34410.1	127.131	30912.8	227414	37582.6	34111.7	0.907647	-0.139797	-0.139797
						-1	3.22982	JL121323_121323_ABP_127_30B.28963.28963.5	N	11.384	0.334033		//19	12//126	1.8365	0.78125	R.DGTK[3592.9]PATTFQSEEDIKR.A	Spt15	1	TBP	DGTKPATTFQSEEDIKR	35	//15	33//255	9.5475	1.38333	R.AAPESEK[2329.22]DTSATSGIVPTLQNIVATVTLGC[160.03]R.L	Spt15	1	TBP	AAPESEKDTSATSGIVPTLQNIVATVTLGCR	55	126.128	125898	127.131	120983	254607	137410	133502	0.971563	-0.041621	-0.041621
						-2	0.0213843	JL121323_121323_ABP_127_50B.30344.30344.5	N	10.4395	0.329343		//19	12//126	1.201	0.625	R.DGTK[3592.89]PATTFQSEEDIKR.A	Spt15	1	TBP	DGTKPATTFQSEEDIKR	35	//15	25//255	9.2385	1.13333	R.AAPESEK[2329.2]DTSATSGIVPTLQNIVATVTLGC[160.03]R.L	Spt15	1	TBP	AAPESEKDTSATSGIVPTLQNIVATVTLGCR	55	126.128	123910	127.131	115453	233076	135284	127400	0.941726	-0.0866209	-0.0866209
						-1	2.24381	JL121323_121323_ABP_127_70B.26667.26667.4	P	9.99575	0.335602	0.0118	//15	24//186	8.97125	1.09677	R.AAPESEK[2329.2]DTSATSGIVPTLQNIVATVTLGC[160.03]R.L	Spt15	1	TBP	AAPESEKDTSATSGIVPTLQNIVATVTLGCR	55	//19	9//97	1.0245	0.323529	R.DGTK[3592.89]PATTFQSEEDIKR.A	Spt15	1	TBP	DGTKPATTFQSEEDIKR	35	126.127	30629.4	127.131	24277.2	104525	33492.7	26789.5	0.799861	-0.322179	-0.322179
						-1	3.60119	JL121323_121323_ABP_127_D.26537.26537.6	N	8.65075	0.271098		//19	13//97	1.3575	0.8125	R.DGTK[3592.9]PATTFQSEEDIKR.A	Spt15	1	TBP	DGTKPATTFQSEEDIKR	35	//15	19//186	7.29325	0.933333	R.AAPESEK[2329.22]DTSATSGIVPTLQNIVATVTLGC[160.03]R.L	Spt15	1	TBP	AAPESEKDTSATSGIVPTLQNIVATVTLGCR	55	126.128	135564	127.131	120897	766937	148074	133407	0.900951	-0.150479	-0.150479
						-2	3.46045	JL121323_121323_ABP_127_100B.23309.23309.6	P	8.0705	0.223219	0.0206	//14	29//265	8.0705	0.96875	K.RAAPESEK[2470.28]DTSATSGIVPTLQNIVATVTLGC[160.03]R.L	Spt15	1	TBP	RAAPESEKDTSATSGIVPTLQNIVATVTLGCR	55	//17	//121	0	0	R.DGTK[3748.99]PATTFQSEEDIK[425.27].R	Spt15	1	TBP	DGTKPATTFQSEEDIK	35	126.127	24145	127.13	19191.9	109692	26401.5	21177.9	0.802148	-0.31806	-0.31806
	70	TBP:35---TBP:8	16.8897	-0.453396	0.453396
						0	3.74529	JL121323_121323_ABP_127_30B.08523.08523.4	NP	16.8897	0.519805	1.78e-06	//19	37//97	15.0168	3.35294	R.DGTK[1810.05]PATTFQSEEDIKR.A	Spt15	1	TBP	DGTKPATTFQSEEDIKR	35	1//9	11//45	1.873	1.44444	R.LK[2329.2]EFK[425.27]EANK.I	Spt15	1	TBP	LKEFKEANK	8	126.128	1.00608e+06	127.131	593303	9237267	1.10262e+06	654700	0.593769	-0.752025	-0.752025
						0	2.50576	JL121323_121323_ABP_127_30B.08367.08367.4	NP	16.081	0.545017	5.3e-06	//19	37//104	15.0275	3.5	R.DGTK[1070.66]PATTFQSEEDIKR.A	Spt15	1	TBP	DGTKPATTFQSEEDIKR	35	//5	5//19	1.0535	1.2	R.LK[2329.2]EFK.E	Spt15	1	TBP	LKEFK	8	126.128	732104	127.131	523144	5.51099e+06	801238	577281	0.720487	-0.472957	-0.472957
						0	2.6069	JL121323_121323_ABP_127_30B.08763.08763.5	NP	13.8915	0.410548	6.51e-05	//15	31//132	12.563	2.67647	R.DGTK[1512.87]PATTFQSEEDIK[425.27]R.A	Spt15	1	TBP	DGTKPATTFQSEEDIKR	35	1//9	6//48	1.3285	0.777778	R.LK[2626.38]EFKEANK.I	Spt15	1	TBP	LKEFKEANK	8	126.127	1.5097e+06	127.13	801375	3.48032e+06	1.65564e+06	884304	0.534117	-0.904771	-0.904771
						0	1.33849	JL121323_121323_ABP_127_30B.08369.08369.3	NP	13.869	0.494535	1.71e-05	//19	33//75	12.2935	3.23529	R.DGTK[1070.66]PATTFQSEEDIKR.A	Spt15	1	TBP	DGTKPATTFQSEEDIKR	35	//5	5//14	1.5755	1.2	R.LK[2329.2]EFK.E	Spt15	1	TBP	LKEFK	8	126.128	403144	127.131	256871	3.70763e+06	441593	283453	0.641888	-0.639607	-0.639607
						0	4.04277	JL121323_121323_ABP_127_30B.08522.08522.6	NP	12.4275	0.423713	2.39e-08	//19	33//126	10.8963	2.76471	R.DGTK[1810.05]PATTFQSEEDIKR.A	Spt15	1	TBP	DGTKPATTFQSEEDIKR	35	//9	9//56	1.53125	1.22222	R.LK[2329.2]EFK[425.27]EANK.I	Spt15	1	TBP	LKEFKEANK	8	126.127	1.28487e+06	127.131	751322	3.40152e+06	1.40823e+06	829071	0.588733	-0.764315	-0.764315
						0	4.5127	JL121323_121323_ABP_127_50B.07792.07792.4	NP	12.422	0.404415	0.00406	//19	33//100	11.4202	2.97059	R.DGTK[1512.87]PATTFQSEEDIKR.A	Spt15	1	TBP	DGTKPATTFQSEEDIKR	35	1//9	5//39	1.00175	0.722222	R.LK[2329.2]EFKEANK.I	Spt15	1	TBP	LKEFKEANK	8	126.128	240946	127.131	237426	536847	262906	261996	0.996539	-0.00500115	-0.00500115
						-1	3.59875	JL121323_121323_ABP_127_30B.08552.08552.7	NP	12.018	0.450079	5.31e-06	//19	27//126	10.419	2.35294	R.DGTK[1810.05]PATTFQSEEDIKR.A	Spt15	1	TBP	DGTKPATTFQSEEDIKR	35	//9	7//56	1.599	1.11111	R.LK[2329.2]EFK[425.27]EANK.I	Spt15	1	TBP	LKEFKEANK	8	126.127	509206	127.131	266589	1.39751e+06	558473	294177	0.526752	-0.924805	-0.924805
						0	2.86895	JL121323_121323_ABP_127_30B.09605.09605.6	NP	11.8432	0.414687	0.000619	//15	27//129	9.9865	2.17647	R.DGTK[1810.05]PATTFQSEEDIK[425.27]R.A	Spt15	1	TBP	DGTKPATTFQSEEDIKR	35	//9	9//56	1.85675	1.22222	R.LK[2626.38]EFK[425.27]EANK.I	Spt15	1	TBP	LKEFKEANK	8	126.127	2.42374e+06	127.13	1.4199e+06	3.68204e+06	2.65641e+06	1.56684e+06	0.589834	-0.761618	-0.761618
						0	2.32663	JL121323_121323_ABP_127_30B.07605.07605.6	NP	11.8302	0.439786	1.7e-07	//19	30//129	11.1255	2.67647	R.DGTK[1512.87]PATTFQSEEDIKR.A	Spt15	1	TBP	DGTKPATTFQSEEDIKR	35	1//9	5//48	0.70475	0.722222	R.LK[2329.2]EFKEANK.I	Spt15	1	TBP	LKEFKEANK	8	126.128	390183	127.131	301311	1468978	426755	332492	0.779116	-0.36009	-0.36009
						-1	0.0111167	JL121323_121323_ABP_127_30B.11301.11301.5	P	11.6933	0.422841	0.0076	//14	13//131	2.09175	0.911765	R.LK[2329.2]EFKEANK[425.27]IVFDPNTR.Q	Spt15	1	TBP	LKEFKEANKIVFDPNTR	8	//19	28//126	9.6015	2.29412	R.DGTK[2752.54]PATTFQSEEDIKR.A	Spt15	1	TBP	DGTKPATTFQSEEDIKR	35	126.127	448863	127.13	329548	1.56499e+06	491143	363651	0.740418	-0.433588	-0.433588
						0	5.17383	JL121323_121323_ABP_127_50B.08740.08740.3	NP	11.511	0.432948	0.0415	//19	28//75	10.432	2.47059	R.DGTK[1070.66]PATTFQSEEDIKR.A	Spt15	1	TBP	DGTKPATTFQSEEDIKR	35	//5	4//14	1.079	0.9	R.LK[2329.2]EFK.E	Spt15	1	TBP	LKEFK	8	126.128	234596	127.131	224584	1.35765e+06	256057	247824	0.967849	-0.0471454	-0.0471454
						0	6.17064	JL121323_121323_ABP_127_50B.08713.08713.4	P	11.485	0.429217	0.00205	//19	26//104	10.5915	2.23529	R.DGTK[1070.66]PATTFQSEEDIKR.A	Spt15	1	TBP	DGTKPATTFQSEEDIKR	35	//5	3//19	0.8935	0.8	R.LK[2329.2]EFK.E	Spt15	1	TBP	LKEFK	8	126.128	429237	127.131	478536	1.18828e+06	467682	528057	1.12909	0.175166	0.175166
						-1	2.20044	JL121323_121323_ABP_127_50B.09291.09291.5	NP	10.7858	0.326184	0.000191	//15	24//132	9.00425	1.88235	R.DGTK[1512.87]PATTFQSEEDIK[425.27]R.A	Spt15	1	TBP	DGTKPATTFQSEEDIKR	35	//9	4//48	1.7815	0.666667	R.LK[2626.38]EFKEANK.I	Spt15	1	TBP	LKEFKEANK	8	126.128	469224	127.131	376741	529878	513030	415727	0.810337	-0.303406	-0.303406
						0	1.87338	JL121323_121323_ABP_127_30B.09561.09561.5	P	10.6933	0.360497	8.67e-06	1//15	32//136	9.85025	2.82353	R.DGTK[1070.66]PATTFQSEEDIK[425.27]R.A	Spt15	1	TBP	DGTKPATTFQSEEDIKR	35	//5	3//24	0.843	0.8	R.LK[2626.38]EFK.E	Spt15	1	TBP	LKEFK	8	126.128	2.33165e+06	127.131	1.5727e+06	2.57509e+06	2.55296e+06	1.73545e+06	0.679778	-0.556864	-0.556864
						0	2.96989	JL121323_121323_ABP_127_30B.08362.08362.5	P	10.0902	0.355247	3.38e-06	//19	30//133	9.76325	2.55882	R.DGTK[1070.66]PATTFQSEEDIKR.A	Spt15	1	TBP	DGTKPATTFQSEEDIKR	35	1//5	3//24	0.327	0.5	R.LK[2329.2]EFK.E	Spt15	1	TBP	LKEFK	8	126.128	497082	127.131	348466	1.77093e+06	544104	384526	0.706715	-0.5008	-0.5008
						574	-118.265	JL121323_121323_ABP_127_30B.08341.08341.4	P	9.83275	0.348339	0.000102	//19	24//104	9.39075	2.02941	R.DGTK[1070.66]PATTFQSEEDIKR.A	Spt15	1	TBP	DGTKPATTFQSEEDIKR	35	//5	3//19	0.442	0.8	R.LK[2329.2]EFK.E	Spt15	1	TBP	LKEFK	8	126.127	232834	127.131	219510	232834	254175	242226	0.95299	-0.069467	-0.069467
						0	4.35487	JL121323_121323_ABP_127_50B.08714.08714.5	P	9.49175	0.34345	0.0028	//19	23//133	9.16775	2	R.DGTK[1070.66]PATTFQSEEDIKR.A	Spt15	1	TBP	DGTKPATTFQSEEDIKR	35	//5	2//24	0.324	0.4	R.LK[2329.2]EFK.E	Spt15	1	TBP	LKEFK	8	126.127	527790	127.131	542792	542792	575616	598962	1.04056	0.0573569	0.0573569
						0	2.05377	JL121323_121323_ABP_127_50B.07790.07790.5	P	8.497	0.332629	3.79e-05	1//19	25//129	8.205	2.05882	R.DGTK[1512.87]PATTFQSEEDIKR.A	Spt15	1	TBP	DGTKPATTFQSEEDIKR	35	//9	3//48	0.292	0.277778	R.LK[2329.2]EFKEANK.I	Spt15	1	TBP	LKEFKEANK	8	126.128	373112	127.131	420838	431609	406471	464388	1.14249	0.192179	0.192179
						0	0.119331	JL121323_121323_ABP_127_1ug.08860.08860.4	NP	8.436	0.247379	0.00575	1//19	30//104	7.47025	2.23529	R.DGTK[1070.66]PATTFQSEEDIKR.A	Spt15	1	TBP	DGTKPATTFQSEEDIKR	35	//5	4//19	0.96575	0.9	R.LK[2329.2]EFK.E	Spt15	1	TBP	LKEFK	8	126.127	95945.6	127.131	83882.6	440663	104820	92563	0.88307	-0.179401	-0.179401
						0	1.19674	JL121323_121323_ABP_127_30B.08381.08381.6	P	8.3545	0.303783	2.01e-05	//19	25//133	8.0245	2.02941	R.DGTK[1070.66]PATTFQSEEDIKR.A	Spt15	1	TBP	DGTKPATTFQSEEDIKR	35	//5	2//24	0.33	0.4	R.LK[2329.2]EFK.E	Spt15	1	TBP	LKEFK	8	126.128	344419	127.131	239014	1.18452e+06	377029	263748	0.699543	-0.515515	-0.515515
						-2	2.58393	JL121323_121323_ABP_127_50B.14245.14245.7	P	8.06325	0.272072	0.00187	//11	15//130	2.67225	1.17647	R.LK[2329.2]EFK[425.27]EANK[425.27]IVFDPNTR.Q	Spt15	1	TBP	LKEFKEANKIVFDPNTR	8	//19	20//126	5.391	1.70588	R.DGTK[3049.72]PATTFQSEEDIKR.A	Spt15	1	TBP	DGTKPATTFQSEEDIKR	35	126.128	2.27771e+06	127.131	1.30335e+06	3.75975e+06	2.49674e+06	1.43823e+06	0.576043	-0.795752	-0.795752
						0	2.32268	JL121323_121323_ABP_127_30B.08737.08737.4	NP	7.8195	0.266132	0.00506	//19	19//97	5.9095	1.35294	R.DGTK[1810.05]PATTFQSEEDIKR.A	Spt15	1	TBP	DGTKPATTFQSEEDIKR	35	1//9	9//45	1.91	1.22222	R.LK[2329.2]EFK[425.27]EANK.I	Spt15	1	TBP	LKEFKEANK	8	126.128	959264	127.131	491388	10204806	1.05221e+06	542238	0.515334	-0.956422	-0.956422
						0	2.04292	JL121323_121323_ABP_127_30B.09580.09580.6	P	7.55175	0.271548	0.000142	//15	22//136	6.73625	1.58824	R.DGTK[1070.66]PATTFQSEEDIK[425.27]R.A	Spt15	1	TBP	DGTKPATTFQSEEDIKR	35	//5	3//24	0.8155	0.8	R.LK[2626.38]EFK.E	Spt15	1	TBP	LKEFK	8	126.128	1.03074e+06	127.131	674039	1.68798e+06	1.12884e+06	743791	0.658899	-0.60187	-0.60187
						0	-3.88647	JL121323_121323_ABP_127_30B.08924.08924.4	P	7.27075	0.24175	0.139	//19	22//104	6.50075	1.67647	R.DGTK[1070.66]PATTFQSEEDIKR.A	Spt15	1	TBP	DGTKPATTFQSEEDIKR	35	//5	4//19	0.77	0.8	R.LK[2329.2]EFK.E	Spt15	1	TBP	LKEFK	8	126.128	306346	127.131	261578	432405	334756	288647	0.86226	-0.213805	-0.213805
						-2	6.44842	JL121323_121323_ABP_127_50B.10860.10860.7	P	6.95675	0.263209	0.0966	//15	16//129	6.16675	1.14706	R.DGTK[1810.05]PATTFQSEEDIK[425.27]R.A	Spt15	1	TBP	DGTKPATTFQSEEDIKR	35	//9	5//56	0.79	0.666667	R.LK[2626.38]EFK[425.27]EANK.I	Spt15	1	TBP	LKEFKEANK	8	126.127	305766	127.131	259816	328682	334138	286703	0.858037	-0.220888	-0.220888
						0	4.13622	JL121323_121323_ABP_127_30B.09549.09549.4	NP	6.51	0.245489	0.0381	//15	16//105	4.051	0.823529	R.DGTK[1070.66]PATTFQSEEDIK[425.27]R.A	Spt15	1	TBP	DGTKPATTFQSEEDIKR	35	//5	6//19	2.459	1.6	R.LK[2626.38]EFK.E	Spt15	1	TBP	LKEFK	8	126.127	1.4687e+06	127.131	1.13056e+06	5.2585e+06	1.6064e+06	1.24756e+06	0.776617	-0.364725	-0.364725
						0	-2.62018	JL121323_121323_ABP_127_50B.13275.13275.5	P	6.13725	0.231712	0.0729	//14	11//131	1.9055	0.705882	R.LK[2329.2]EFKEANK[425.27]IVFDPNTR.Q	Spt15	1	TBP	LKEFKEANKIVFDPNTR	8	//19	17//126	4.23175	1.26471	R.DGTK[2752.54]PATTFQSEEDIKR.A	Spt15	1	TBP	DGTKPATTFQSEEDIKR	35	126.128	474612	127.131	342888	1.76901e+06	519384	378371	0.7285	-0.457	-0.457
						0	-0.949636	JL121323_121323_ABP_127_30B.09005.09005.5	P	6.093	0.210198	0.0011	//15	19//132	5.51425	1.38235	R.DGTK[1512.87]PATTFQSEEDIK[425.27]R.A	Spt15	1	TBP	DGTKPATTFQSEEDIKR	35	//9	4//48	0.57875	0.5	R.LK[2626.38]EFKEANK.I	Spt15	1	TBP	LKEFKEANK	8	126.127	531522	127.131	356533	1.76922e+06	581998	393428	0.675996	-0.564913	-0.564913
						-1	-1.61382	JL121323_121323_ABP_127_30B.09090.09090.6	P	5.97275	0.216691	3.45e-05	//19	21//126	5.171	1.55882	R.DGTK[1810.05]PATTFQSEEDIKR.A	Spt15	1	TBP	DGTKPATTFQSEEDIKR	35	//9	6//56	0.80175	0.777778	R.LK[2329.2]EFK[425.27]EANK.I	Spt15	1	TBP	LKEFKEANK	8	126.128	304862	127.131	232701	304862	333470	256782	0.770031	-0.377012	-0.377012
						0	7.76948	JL121323_121323_ABP_127_50B.10840.10840.5	NP	5.458	0.214633	0.578	//15	14//129	3.6245	0.764706	R.DGTK[1810.05]PATTFQSEEDIK[425.27]R.A	Spt15	1	TBP	DGTKPATTFQSEEDIKR	35	//9	7//56	1.8335	0.944444	R.LK[2626.38]EFK[425.27]EANK.I	Spt15	1	TBP	LKEFKEANK	8	126.127	753503	127.131	626822	3181437	823583	691687	0.839851	-0.251795	-0.251795
						1143	-173.745	JL121323_121323_ABP_127_30B.08453.08453.3	P	5.33925	0.170933	0.502	//19	18//75	5.09375	1.55882	R.DGTK[1070.66]PATTFQSEEDIKR.A	Spt15	1	TBP	DGTKPATTFQSEEDIKR	35	//5	2//14	0.2455	0.4	R.LK[2329.2]EFK.E	Spt15	1	TBP	LKEFK	8	126.128	666137	127.131	534622	6017913	728329	589947	0.810001	-0.304004	-0.304004
						0	1.52816	JL121323_121323_ABP_127_70B.13141.13141.6	P	5.2995	0.179787	0.000142	//11	11//130	1.42725	0.676471	R.LK[2329.2]EFK[425.27]EANK[425.27]IVFDPNTR.Q	Spt15	1	TBP	LKEFKEANKIVFDPNTR	8	//19	15//126	3.87225	1.11765	R.DGTK[3049.72]PATTFQSEEDIKR.A	Spt15	1	TBP	DGTKPATTFQSEEDIKR	35	126.127	892513	127.131	547936	6.63625e+06	977886	604638	0.618311	-0.693595	-0.693595
						0	-0.966895	JL121323_121323_ABP_127_50B.15016.15016.6	P	5.16225	0.188575	0.0421	//11	10//130	2.30625	0.794118	R.LK[2329.2]EFK[425.27]EANK[425.27]IVFDPNTR.Q	Spt15	1	TBP	LKEFKEANKIVFDPNTR	8	//19	15//126	2.856	0.941176	R.DGTK[3049.72]PATTFQSEEDIKR.A	Spt15	1	TBP	DGTKPATTFQSEEDIKR	35	126.127	1.06247e+06	127.131	725086	3.40705e+06	1.16322e+06	800121	0.687851	-0.539831	-0.539831
						-1	5.56057	JL121323_121323_ABP_127_50B.15995.15995.6	P	5.0655	0.186995	0.183	//11	8//130	1.71275	0.529412	R.LK[2329.2]EFK[425.27]EANK[425.27]IVFDPNTR.Q	Spt15	1	TBP	LKEFKEANKIVFDPNTR	8	//19	14//126	3.35275	1.08824	R.DGTK[3049.72]PATTFQSEEDIKR.A	Spt15	1	TBP	DGTKPATTFQSEEDIKR	35	126.127	711902	127.131	459448	2187937	779726	506994	0.65022	-0.621	-0.621
						0	0.33775	JL121323_121323_ABP_127_30B.09801.09801.5	NP	4.83125	0.147774	0.00271	//15	15//129	2.588	0.852941	R.DGTK[1810.05]PATTFQSEEDIK[425.27]R.A	Spt15	1	TBP	DGTKPATTFQSEEDIKR	35	//9	9//56	2.24325	1.38889	R.LK[2626.38]EFK[425.27]EANK.I	Spt15	1	TBP	LKEFKEANK	8	126.128	1.53839e+06	127.131	885562	7.31144e+06	1.68626e+06	977204	0.579511	-0.787093	-0.787093
						0	4.77929	JL121323_121323_ABP_127_50B.15990.15990.6	P	4.52625	0.142761	0.23	//11	10//130	1.47725	0.588235	R.LK[2329.2]EFK[425.27]EANK[425.27]IVFDPNTR.Q	Spt15	1	TBP	LKEFKEANKIVFDPNTR	8	//19	14//126	3.049	1	R.DGTK[3049.72]PATTFQSEEDIKR.A	Spt15	1	TBP	DGTKPATTFQSEEDIKR	35	126.128	651189	127.131	466946	2.79036e+06	712663	515267	0.723017	-0.467899	-0.467899
						0	3.94761	JL121323_121323_ABP_127_50B.15086.15086.6	P	4.49775	0.165745	0.282	//11	6//130	1.2235	0.411765	R.LK[2329.2]EFK[425.27]EANK[425.27]IVFDPNTR.Q	Spt15	1	TBP	LKEFKEANKIVFDPNTR	8	//19	16//126	3.27425	1.11765	R.DGTK[3049.72]PATTFQSEEDIKR.A	Spt15	1	TBP	DGTKPATTFQSEEDIKR	35	126.128	1.0032e+06	127.131	695619	2973673	1.09819e+06	767605	0.698973	-0.516691	-0.516691
						-1	2.46066	JL121323_121323_ABP_127_50B.17205.17205.6	P	4.0495	0.138594	0.253	//11	10//130	2.28975	0.676471	R.LK[2329.2]EFK[425.27]EANK[425.27]IVFDPNTR.Q	Spt15	1	TBP	LKEFKEANKIVFDPNTR	8	//19	11//126	1.75975	0.588235	R.DGTK[3049.72]PATTFQSEEDIKR.A	Spt15	1	TBP	DGTKPATTFQSEEDIKR	35	126.127	549596	127.131	374786	1.41112e+06	601714	413570	0.68732	-0.540947	-0.540947
						0	2.55161	JL121323_121323_ABP_127_30B.12860.12860.5	P	4.02525	0.165716	0.666	1//11	11//130	2.5265	0.676471	R.LK[2329.2]EFK[425.27]EANK[425.27]IVFDPNTR.Q	Spt15	1	TBP	LKEFKEANKIVFDPNTR	8	//19	9//126	1.49875	0.5	R.DGTK[3049.72]PATTFQSEEDIKR.A	Spt15	1	TBP	DGTKPATTFQSEEDIKR	35	126.127	610907	127.131	387746	3.24302e+06	669189	427872	0.639388	-0.645236	-0.645236
						-1	-5.59007	JL121323_121323_ABP_127_30B.09423.09423.5	P	3.988	0.145846	0.127	//15	15//132	3.56275	1	R.DGTK[1512.87]PATTFQSEEDIK[425.27]R.A	Spt15	1	TBP	DGTKPATTFQSEEDIKR	35	//9	4//48	0.42525	0.5	R.LK[2626.38]EFKEANK.I	Spt15	1	TBP	LKEFKEANK	8	126.128	494140	127.131	408124	545921	540134	450358	0.83379	-0.262244	-0.262244
						2422	45.4015	JL121323_121323_ABP_127_50B.16826.16826.3	P	3.8885	0.122561	0.375	//11	7//62	2.251	0.588235	R.LK[2329.2]EFK[425.27]EANK[425.27]IVFDPNTR.Q	Spt15	1	TBP	LKEFKEANKIVFDPNTR	8	//19	10//68	1.6375	0.735294	R.DGTK[3049.72]PATTFQSEEDIKR.A	Spt15	1	TBP	DGTKPATTFQSEEDIKR	35	126.127	1339951	127.131	1.07241e+06	1339951	1.46509e+06	1.18339e+06	0.807726	-0.308062	-0.308062
						0	3.6363	JL121323_121323_ABP_127_30B.08951.08951.6	P	3.75875	0.132982	0.000266	//19	18//126	2.607	1.11765	R.DGTK[1810.05]PATTFQSEEDIKR.A	Spt15	1	TBP	DGTKPATTFQSEEDIKR	35	//9	7//56	1.15175	0.944444	R.LK[2329.2]EFK[425.27]EANK.I	Spt15	1	TBP	LKEFKEANK	8	126.127	649358	127.131	398806	685172	711470	440076	0.618544	-0.693052	-0.693052
						-2	-1.52135	JL121323_121323_ABP_127_70B.13973.13973.6	P	3.6905	0.138673	0.0723	//11	7//130	1.15725	0.411765	R.LK[2329.2]EFK[425.27]EANK[425.27]IVFDPNTR.Q	Spt15	1	TBP	LKEFKEANKIVFDPNTR	8	//19	15//126	2.53325	0.852941	R.DGTK[3049.72]PATTFQSEEDIKR.A	Spt15	1	TBP	DGTKPATTFQSEEDIKR	35	126.127	351189	127.131	236376	1.46868e+06	384530	260837	0.678327	-0.559948	-0.559948
						0	0.535401	JL121323_121323_ABP_127_30B.12567.12567.5	P	3.01425	0.146761	0.795	//11	11//130	1.746	0.529412	R.LK[2329.2]EFK[425.27]EANK[425.27]IVFDPNTR.Q	Spt15	1	TBP	LKEFKEANKIVFDPNTR	8	//19	12//126	1.26825	0.5	R.DGTK[3049.72]PATTFQSEEDIKR.A	Spt15	1	TBP	DGTKPATTFQSEEDIKR	35	126.127	1.31808e+06	127.131	743778	8.07101e+06	1.44495e+06	820747	0.56801	-0.816011	-0.816011
						-1	2.0629	JL121323_121323_ABP_127_30B.12683.12683.4	P	2.79725	0.135143	0.765	//11	7//96	1.746	0.470588	R.LK[2329.2]EFK[425.27]EANK[425.27]IVFDPNTR.Q	Spt15	1	TBP	LKEFKEANKIVFDPNTR	8	//19	6//97	1.05125	0.323529	R.DGTK[3049.72]PATTFQSEEDIKR.A	Spt15	1	TBP	DGTKPATTFQSEEDIKR	35	126.128	397711	127.131	235182	2.82373e+06	435864	259519	0.595415	-0.748034	-0.748034
						-2	-4.40291	JL121323_121323_ABP_127_30B.10160.10160.5	P	2.7795	0.100639	0.745	//15	11//129	2.3315	0.676471	R.DGTK[1810.05]PATTFQSEEDIK[425.27]R.A	Spt15	1	TBP	DGTKPATTFQSEEDIKR	35	//9	5//56	0.448	0.555556	R.LK[2626.38]EFK[425.27]EANK.I	Spt15	1	TBP	LKEFKEANK	8	126.127	642781	127.131	540032	1.46119e+06	702499	595916	0.848281	-0.237386	-0.237386
						0	-1.26933	JL121323_121323_ABP_127_70B.14041.14041.6	P	2.7185	0.102771	0.000585	//11	7//130	1.23025	0.411765	R.LK[2329.2]EFK[425.27]EANK[425.27]IVFDPNTR.Q	Spt15	1	TBP	LKEFKEANKIVFDPNTR	8	//19	13//126	1.48825	0.647059	R.DGTK[3049.72]PATTFQSEEDIKR.A	Spt15	1	TBP	DGTKPATTFQSEEDIKR	35	126.127	267939	127.131	198751	1134297	293153	219318	0.748136	-0.418627	-0.418627
						0	0.199924	JL121323_121323_ABP_127_30B.08670.08670.5	P	2.19075	0.0669678	0.00133	//19	16//133	1.68175	0.764706	R.DGTK[1070.66]PATTFQSEEDIKR.A	Spt15	1	TBP	DGTKPATTFQSEEDIKR	35	//5	2//24	0.509	0.4	R.LK[2329.2]EFK.E	Spt15	1	TBP	LKEFK	8	126.128	262339	127.131	208215	436529	286860	229762	0.800956	-0.320205	-0.320205
						-1	0.31687	JL121323_121323_ABP_127_50B.09519.09519.6	P	2.171	0.0748543	0.256	//19	7//126	0.393	0.323529	R.DGTK[1810.05]PATTFQSEEDIKR.A	Spt15	1	TBP	DGTKPATTFQSEEDIKR	35	//9	7//56	1.778	1.11111	R.LK[2329.2]EFK[425.27]EANK.I	Spt15	1	TBP	LKEFKEANK	8	126.128	476200	127.131	420265	476200	520196	463756	0.891501	-0.165691	-0.165691
	71	TBP:35---TBP:83	15.979	-0.508422	0.508422
						-1	1.06826	JL121323_121323_ABP_127_30B.11522.11522.4	NP	15.979	0.537353	2.07e-05	//19	34//98	13.83	3.26471	R.DGTK[1643]PATTFQSEEDIKR.A	Spt15	1	TBP	DGTKPATTFQSEEDIKR	35	//13	7//50	2.149	0.818182	R.LDLK[2329.2]TVALHAR.N	Spt15	1	TBP	LDLKTVALHAR	83	126.128	674458	127.131	522090	3.05449e+06	737660	576118	0.781007	-0.356593	-0.356593
						-2	4.12899	JL121323_121323_ABP_127_30B.11486.11486.7	NP	13.509	0.525714	6.82e-09	//19	23//127	10.1785	2.08824	R.DGTK[1643]PATTFQSEEDIKR.A	Spt15	1	TBP	DGTKPATTFQSEEDIKR	35	//13	8//62	3.3305	1.09091	R.LDLK[2329.2]TVALHAR.N	Spt15	1	TBP	LDLKTVALHAR	83	126.128	205005	127.131	103689	1.32455e+06	224884	114419	0.508792	-0.974853	-0.974853
						-2	2.51037	JL121323_121323_ABP_127_30B.11456.11456.7	N	13.4462	0.517213		//13	9//50	3.338	1.25	R.LDLK[2329.19]TVALHAR.N	Spt15	1	TBP	LDLKTVALHAR	83	//19	24//98	10.1082	2.25	R.DGTK[1642.99]PATTFQSEEDIKR.A	Spt15	1	TBP	DGTKPATTFQSEEDIKR	35	126.128	161489	127.131	84521	998957	177114	93267.6	0.526596	-0.925231	-0.925231
						0	3.1561	JL121323_121323_ABP_127_30B.11450.11450.6	NP	12.9347	0.522891	5.27e-08	//19	27//127	9.8515	2.35294	R.DGTK[1643]PATTFQSEEDIKR.A	Spt15	1	TBP	DGTKPATTFQSEEDIKR	35	//13	9//62	3.08325	1.18182	R.LDLK[2329.2]TVALHAR.N	Spt15	1	TBP	LDLKTVALHAR	83	126.128	664917	127.131	425698	2.44711e+06	728307	469750	0.644989	-0.632653	-0.632653
						-1	4.3687	JL121323_121323_ABP_127_30B.11462.11462.4	N	12.0965	0.400017		//13	5//50	1.811	0.8	R.LDLK[2329.18]TVALHAR.N	Spt15	1	TBP	LDLKTVALHAR	83	//19	28//98	10.2855	2.53125	R.DGTK[1642.98]PATTFQSEEDIKR.A	Spt15	1	TBP	DGTKPATTFQSEEDIKR	35	126.128	573157	127.131	453385	1.50261e+06	626748	500303	0.798251	-0.325085	-0.325085
						-1	4.25717	JL121323_121323_ABP_127_1ug.12674.12674.6	NP	11.472	0.423376	1.88e-05	//19	24//127	8.71975	2	R.DGTK[1643]PATTFQSEEDIKR.A	Spt15	1	TBP	DGTKPATTFQSEEDIKR	35	//13	9//62	2.75225	1.13636	R.LDLK[2329.2]TVALHAR.N	Spt15	1	TBP	LDLKTVALHAR	83	126.128	67901.6	127.131	64461.5	174268	74119.9	71132.2	0.959691	-0.059358	-0.059358
						0	0.70535	JL121323_121323_ABP_127_70B.12092.12092.6	NP	9.8245	0.419205	2.33e-24	//19	24//127	7.56075	2.08824	R.DGTK[1643]PATTFQSEEDIKR.A	Spt15	1	TBP	DGTKPATTFQSEEDIKR	35	//13	9//62	2.26375	1.18182	R.LDLK[2329.2]TVALHAR.N	Spt15	1	TBP	LDLKTVALHAR	83	126.128	102553	127.131	86782.7	194089	112073	95763.3	0.85447	-0.226899	-0.226899
						0	4.25605	JL121323_121323_ABP_127_30B.13139.13139.6	NP	9.71275	0.389024	5.6e-06	//15	23//130	6.60625	1.82353	R.DGTK[1643]PATTFQSEEDIK[425.27]R.A	Spt15	1	TBP	DGTKPATTFQSEEDIKR	35	//13	9//62	3.1065	1.27273	R.LDLK[2626.38]TVALHAR.N	Spt15	1	TBP	LDLKTVALHAR	83	126.127	1.616e+06	127.13	730589	3.4789e+06	1.77375e+06	806193	0.454513	-1.13761	-1.13761
						0	1.04269	JL121323_121323_ABP_127_50B.13138.13138.6	N	9.509	0.381374		//13	9//50	2.16525	1.3	R.LDLK[2329.2]TVALHAR.N	Spt15	1	TBP	LDLKTVALHAR	83	//19	24//98	7.34375	2.21875	R.DGTK[1643]PATTFQSEEDIKR.A	Spt15	1	TBP	DGTKPATTFQSEEDIKR	35	126.127	478433	127.131	379141	985231	523159	418376	0.79971	-0.322452	-0.322452
						1718	24.0346	JL121323_121323_ABP_127_50B.13143.13143.3	P	9.378	0.37797	2.72e-05	//19	21//69	6.5975	2.02941	R.DGTK[1643]PATTFQSEEDIKR.A	Spt15	1	TBP	DGTKPATTFQSEEDIKR	35	//13	9//38	2.7805	1.18182	R.LDLK[2329.2]TVALHAR.N	Spt15	1	TBP	LDLKTVALHAR	83	126.128	899016	127.131	759807	938510	982485	838435	0.853382	-0.228736	-0.228736
						0	-4.70731	JL121323_121323_ABP_127_30B.11435.11435.5	NP	8.06325	0.328556	7.1e-06	//19	22//127	5.2625	1.55882	R.DGTK[1643]PATTFQSEEDIKR.A	Spt15	1	TBP	DGTKPATTFQSEEDIKR	35	//13	11//62	2.80075	1.36364	R.LDLK[2329.2]TVALHAR.N	Spt15	1	TBP	LDLKTVALHAR	83	126.127	875765	127.13	707821	1.06507e+06	957468	781069	0.815765	-0.293774	-0.293774
						-1	2.18371	JL121323_121323_ABP_127_30B.13082.13082.5	NP	7.84575	0.300258	7.47e-05	//15	16//130	4.5505	1.02941	R.DGTK[1643]PATTFQSEEDIK[425.27]R.A	Spt15	1	TBP	DGTKPATTFQSEEDIKR	35	//13	12//62	3.29525	1.31818	R.LDLK[2626.38]TVALHAR.N	Spt15	1	TBP	LDLKTVALHAR	83	126.127	1221290	127.131	702302	1.51974e+06	1.33869e+06	774979	0.578908	-0.788593	-0.788593
						-1	4.18095	JL121323_121323_ABP_127_30B.11414.11414.6	N	7.782	0.294817		//13	7//50	2.24175	1.05	R.LDLK[2329.21]TVALHAR.N	Spt15	1	TBP	LDLKTVALHAR	83	//19	20//98	5.54025	1.6875	R.DGTK[1643.01]PATTFQSEEDIKR.A	Spt15	1	TBP	DGTKPATTFQSEEDIKR	35	126.128	475478	127.131	345434	692215	520310	381180	0.732603	-0.448897	-0.448897
						1867	131.387	JL121323_121323_ABP_127_30B.13011.13011.3	P	7.213	0.271901	1.77e-05	//15	14//68	4.56175	1.23529	R.DGTK[1643]PATTFQSEEDIK[425.27]R.A	Spt15	1	TBP	DGTKPATTFQSEEDIKR	35	//13	8//38	2.65125	1.13636	R.LDLK[2626.38]TVALHAR.N	Spt15	1	TBP	LDLKTVALHAR	83	126.127	2.26808e+06	127.131	1.20949e+06	2.7977e+06	2.48726e+06	1.33465e+06	0.536596	-0.898092	-0.898092
						-2	4.47414	JL121323_121323_ABP_127_30B.11976.11976.5	NP	7.15875	0.187598	0.00252	//19	14//127	2.158	1	R.DGTK[1643]PATTFQSEEDIKR.A	Spt15	1	TBP	DGTKPATTFQSEEDIKR	35	//13	14//62	5.00075	1.86364	R.LDLK[2329.2]TVALHAR.N	Spt15	1	TBP	LDLKTVALHAR	83	126.127	1.21087e+06	127.131	953879	1.86135e+06	1.32414e+06	1.05259e+06	0.794924	-0.331112	-0.331112
						-1	0.71911	JL121323_121323_ABP_127_30B.11963.11963.6	N	6.4825	0.228777		//13	10//50	3.33875	1.45	R.LDLK[2329.2]TVALHAR.N	Spt15	1	TBP	LDLKTVALHAR	83	//19	17//98	3.14375	1.3125	R.DGTK[1642.99]PATTFQSEEDIKR.A	Spt15	1	TBP	DGTKPATTFQSEEDIKR	35	126.127	617871	127.13	397953	1.69099e+06	676748	439134	0.64889	-0.623955	-0.623955
						0	0.531624	JL121323_121323_ABP_127_30B.11995.11995.5	NP	5.5465	0.149899	0.036	//19	13//127	0.69875	0.647059	R.DGTK[1643]PATTFQSEEDIKR.A	Spt15	1	TBP	DGTKPATTFQSEEDIKR	35	//13	14//62	4.84775	1.86364	R.LDLK[2329.2]TVALHAR.N	Spt15	1	TBP	LDLKTVALHAR	83	126.127	1.40548e+06	127.13	1.08562e+06	2.76185e+06	1.53721e+06	1.19797e+06	0.779314	-0.359724	-0.359724
						0	0.385686	JL121323_121323_ABP_127_30B.12006.12006.6	NP	4.517	0.156903	0.000112	//19	13//127	1.51	0.823529	R.DGTK[1643]PATTFQSEEDIKR.A	Spt15	1	TBP	DGTKPATTFQSEEDIKR	35	//13	8//62	3.007	1	R.LDLK[2329.2]TVALHAR.N	Spt15	1	TBP	LDLKTVALHAR	83	126.127	791537	127.131	513942	2.82861e+06	866912	567127	0.654192	-0.612214	-0.612214
						0	3.10669	JL121323_121323_ABP_127_50B.13089.13089.5	P	2.03	0.0754366	0.0613	//19	12//127	0.8985	0.676471	R.DGTK[1643]PATTFQSEEDIKR.A	Spt15	1	TBP	DGTKPATTFQSEEDIKR	35	//13	6//62	1.1315	0.772727	R.LDLK[2329.2]TVALHAR.N	Spt15	1	TBP	LDLKTVALHAR	83	126.127	942607	127.13	861816	992937	1.02933e+06	951000	0.923901	-0.11419	-0.11419
	72	TBP:35---TBP:97	15.3848	-0.736173	0.736173
						0	2.41519	JL121323_121323_ABP_127_30B.07644.07644.4	P	15.3848	0.495029	0.11	//19	36//101	14.9105	3.23529	R.DGTK[1397.75]PATTFQSEEDIKR.A	Spt15	1	TBP	DGTKPATTFQSEEDIKR	35	1//10	4//33	0.47425	0.4375	R.NAEYNPK[2329.2]R.F	Spt15	1	TBP	NAEYNPKR	97	126.127	263137	127.13	127607	2.17522e+06	288720	140812	0.487711	-1.0359	-1.0359
						0	1.34426	JL121323_121323_ABP_127_50B.07648.07648.4	P	14.068	0.499609	0.0748	//19	33//101	13.7777	3.02941	R.DGTK[1397.75]PATTFQSEEDIKR.A	Spt15	1	TBP	DGTKPATTFQSEEDIKR	35	1//10	3//33	0.29025	0.3125	R.NAEYNPK[2329.2]R.F	Spt15	1	TBP	NAEYNPKR	97	126.128	239450	127.131	191682	1.20961e+06	261811	211518	0.807901	-0.30775	-0.30775
						0	2.64467	JL121323_121323_ABP_127_30B.07471.07471.4	P	13.9942	0.399186	3.73e-05	//19	36//101	13.4823	3.05882	R.DGTK[1397.75]PATTFQSEEDIKR.A	Spt15	1	TBP	DGTKPATTFQSEEDIKR	35	2//10	5//33	0.512	0.625	R.NAEYNPK[2329.2]R.F	Spt15	1	TBP	NAEYNPKR	97	126.128	512897	127.132	201519	3.7041e+06	563336	222373	0.394744	-1.34101	-1.34101
						0	0.42632	JL121323_121323_ABP_127_30B.08216.08216.4	P	12.2613	0.404789	0.318	//19	29//101	11.9712	2.58824	R.DGTK[1397.75]PATTFQSEEDIKR.A	Spt15	1	TBP	DGTKPATTFQSEEDIKR	35	1//10	3//33	0.29	0.3125	R.NAEYNPK[2329.2]R.F	Spt15	1	TBP	NAEYNPKR	97	126.128	110215	127.131	89906.4	261802	120488	99210.3	0.823406	-0.280324	-0.280324
						0	2.41519	JL121323_121323_ABP_127_70B.06992.06992.4	P	11.886	0.405444	0.00808	//19	30//101	11.675	2.61765	R.DGTK[1397.75]PATTFQSEEDIKR.A	Spt15	1	TBP	DGTKPATTFQSEEDIKR	35	//10	3//33	0.211	0.3125	R.NAEYNPK[2329.2]R.F	Spt15	1	TBP	NAEYNPKR	97	126.127	172494	127.131	169381	596112	188222	186909	0.993021	-0.0101041	-0.0101041
						0	3.67319	JL121323_121323_ABP_127_30B.07472.07472.5	NP	11.8603	0.35729	0.00453	//19	31//130	10.3345	2.55882	R.DGTK[1397.75]PATTFQSEEDIKR.A	Spt15	1	TBP	DGTKPATTFQSEEDIKR	35	1//10	7//41	1.52575	1.0625	R.NAEYNPK[2329.2]R.F	Spt15	1	TBP	NAEYNPKR	97	126.128	918791	127.131	377998	2.32465e+06	1.00894e+06	417115	0.413419	-1.27432	-1.27432
						0	3.40684	JL121323_121323_ABP_127_30B.08695.08695.5	P	11.3205	0.33323	0.535	//15	30//133	10.328	2.5	R.DGTK[1397.75]PATTFQSEEDIK[425.27]R.A	Spt15	1	TBP	DGTKPATTFQSEEDIKR	35	//10	7//41	0.9925	0.875	R.NAEYNPK[2626.38]R.F	Spt15	1	TBP	NAEYNPKR	97	126.127	2.21078e+06	127.131	808316	4.58976e+06	2.42893e+06	891963	0.367224	-1.44527	-1.44527
						0	1.6652	JL121323_121323_ABP_127_50B.07665.07665.5	NP	11.2685	0.404005	0.0119	1//19	27//130	9.923	2.11765	R.DGTK[1397.75]PATTFQSEEDIKR.A	Spt15	1	TBP	DGTKPATTFQSEEDIKR	35	1//10	7//41	1.3455	0.9375	R.NAEYNPK[2329.2]R.F	Spt15	1	TBP	NAEYNPKR	97	126.127	523365	127.131	385692	893408	572645	425605	0.743226	-0.428127	-0.428127
						0	2.43847	JL121323_121323_ABP_127_30B.07479.07479.3	NP	11.197	0.354481	0.0662	//19	26//72	10.1242	2.55882	R.DGTK[1397.75]PATTFQSEEDIKR.A	Spt15	1	TBP	DGTKPATTFQSEEDIKR	35	1//10	6//25	1.07275	0.875	R.NAEYNPK[2329.2]R.F	Spt15	1	TBP	NAEYNPKR	97	126.128	606195	127.131	229940	4464424	665909	253735	0.381035	-1.39201	-1.39201
						0	2.33453	JL121323_121323_ABP_127_30B.07657.07657.5	NP	11.174	0.402232	0.0156	//19	25//130	9.934	2.11765	R.DGTK[1397.75]PATTFQSEEDIKR.A	Spt15	1	TBP	DGTKPATTFQSEEDIKR	35	1//10	6//41	1.24	0.75	R.NAEYNPK[2329.2]R.F	Spt15	1	TBP	NAEYNPKR	97	126.127	312517	127.13	178216	850439	342577	196659	0.574058	-0.800732	-0.800732
						0	3.38634	JL121323_121323_ABP_127_1ug.07825.07825.5	NP	11.1143	0.347483	0.68	//19	27//130	10.0905	2.05882	R.DGTK[1397.75]PATTFQSEEDIKR.A	Spt15	1	TBP	DGTKPATTFQSEEDIKR	35	1//10	6//41	1.02375	0.8125	R.NAEYNPK[2329.2]R.F	Spt15	1	TBP	NAEYNPKR	97	126.128	129829	127.131	72610.9	297409	142334	80125	0.562936	-0.828956	-0.828956
						0	2.82759	JL121323_121323_ABP_127_30B.07488.07488.6	P	10.6293	0.381325	0.00358	//19	23//130	10.2728	2.08824	R.DGTK[1397.75]PATTFQSEEDIKR.A	Spt15	1	TBP	DGTKPATTFQSEEDIKR	35	2//10	5//41	0.3565	0.4375	R.NAEYNPK[2329.2]R.F	Spt15	1	TBP	NAEYNPKR	97	126.128	396208	127.131	162782	1.28395e+06	435086	179628	0.412856	-1.27629	-1.27629
						0	1.86838	JL121323_121323_ABP_127_30B.08175.08175.5	N	9.545	0.359219		//10	6//41	0.91425	0.928571	R.NAEYNPK[2329.21]R.F	Spt15	1	TBP	NAEYNPKR	97	//19	23//130	8.63075	2.09375	R.DGTK[1397.76]PATTFQSEEDIKR.A	Spt15	1	TBP	DGTKPATTFQSEEDIKR	35	126.128	125592	127.131	96143.2	143113	137374	106092	0.772289	-0.372787	-0.372787
						0	4.91623	JL121323_121323_ABP_127_30B.07854.07854.5	NP	9.46175	0.301099	0.0234	1//19	24//130	8.511	1.76471	R.DGTK[1397.75]PATTFQSEEDIKR.A	Spt15	1	TBP	DGTKPATTFQSEEDIKR	35	//10	7//41	0.95075	0.875	R.NAEYNPK[2329.2]R.F	Spt15	1	TBP	NAEYNPKR	97	126.128	137422	127.131	112346	187320	150227	123972	0.825229	-0.277134	-0.277134
						0	-3.11573	JL121323_121323_ABP_127_70B.07003.07003.5	NP	9.24175	0.339845	1.02e-08	//19	25//130	8.1285	2.02941	R.DGTK[1397.75]PATTFQSEEDIKR.A	Spt15	1	TBP	DGTKPATTFQSEEDIKR	35	//10	6//41	1.11325	0.8125	R.NAEYNPK[2329.2]R.F	Spt15	1	TBP	NAEYNPKR	97	126.127	209446	127.131	168743	228099	228992	186205	0.813148	-0.29841	-0.29841
						0	5.23718	JL121323_121323_ABP_127_50B.07663.07663.6	P	9.1055	0.371995	0.572	//19	22//130	8.89975	2.05882	R.DGTK[1397.75]PATTFQSEEDIKR.A	Spt15	1	TBP	DGTKPATTFQSEEDIKR	35	//10	3//41	0.20575	0.3125	R.NAEYNPK[2329.2]R.F	Spt15	1	TBP	NAEYNPKR	97	126.128	164292	127.131	164957	164957	179229	182027	1.01562	0.0223545	0.0223545
						0	5.18749	JL121323_121323_ABP_127_30B.08621.08621.6	P	7.784	0.314454	0.582	//15	21//133	7.52525	1.5	R.DGTK[1397.75]PATTFQSEEDIK[425.27]R.A	Spt15	1	TBP	DGTKPATTFQSEEDIKR	35	//10	4//41	0.25875	0.25	R.NAEYNPK[2626.38]R.F	Spt15	1	TBP	NAEYNPKR	97	126.127	305220	127.13	166042	340149	334675	183225	0.54747	-0.869148	-0.869148
						0	2.55322	JL121323_121323_ABP_127_30B.07658.07658.3	P	7.337	0.352072	0.787	//19	20//72	6.668	1.52941	R.DGTK[1397.75]PATTFQSEEDIKR.A	Spt15	1	TBP	DGTKPATTFQSEEDIKR	35	1//10	5//25	0.669	0.5	R.NAEYNPK[2329.2]R.F	Spt15	1	TBP	NAEYNPKR	97	126.127	124224	127.131	50784.1	1.34746e+06	136416	56039.4	0.410797	-1.2835	-1.2835
						1742	-107.03	JL121323_121323_ABP_127_30B.08594.08594.3	P	7.03025	0.262098	0.285	1//15	15//71	6.86875	1.26471	R.DGTK[1397.75]PATTFQSEEDIK[425.27]R.A	Spt15	1	TBP	DGTKPATTFQSEEDIKR	35	//10	3//25	0.1615	0.3125	R.NAEYNPK[2626.38]R.F	Spt15	1	TBP	NAEYNPKR	97	126.127	462015	127.131	301758	462015	505989	332985	0.658087	-0.603649	-0.603649
						0	-0.791903	JL121323_121323_ABP_127_50B.09330.09330.5	P	4.86275	0.140843	0.751	//15	21//133	4.53775	1.35294	R.DGTK[1397.75]PATTFQSEEDIK[425.27]R.A	Spt15	1	TBP	DGTKPATTFQSEEDIKR	35	//10	5//41	0.325	0.4375	R.NAEYNPK[2626.38]R.F	Spt15	1	TBP	NAEYNPKR	97	126.127	1.02852e+06	127.131	562420	1.72991e+06	1.12775e+06	620621	0.55032	-0.861659	-0.861659
						0	-2.47521	JL121323_121323_ABP_127_50B.09334.09334.6	P	3.294	0.12087	0.27	//15	13//133	3.123	1	R.DGTK[1397.75]PATTFQSEEDIK[425.27]R.A	Spt15	1	TBP	DGTKPATTFQSEEDIKR	35	//10	3//41	0.171	0.3125	R.NAEYNPK[2626.38]R.F	Spt15	1	TBP	NAEYNPKR	97	126.128	489389	127.131	337153	489389	535755	372043	0.694426	-0.526106	-0.526106
						-1	1.33865	JL121323_121323_ABP_127_50B.09344.09344.6	P	2.982	0.102794	0.384	//15	12//133	2.80275	0.911765	R.DGTK[1397.75]PATTFQSEEDIK[425.27]R.A	Spt15	1	TBP	DGTKPATTFQSEEDIKR	35	//10	3//41	0.17925	0.3125	R.NAEYNPK[2626.38]R.F	Spt15	1	TBP	NAEYNPKR	97	126.128	575053	127.131	350286	622070	630094	386535	0.613457	-0.704967	-0.704967
	73	TBP:47---TBP:55	16.2755	-0.448976	0.448976
						-1	2.09903	JL121323_121323_ABP_127_50B.30895.30895.5	P	16.2755	0.476344	0.682	//15	38//255	15.3865	1.90323	R.AAPESEK[2626.38]DTSATSGIVPTLQNIVATVTLGC[160.03]R.L	Spt15	1	TBP	AAPESEKDTSATSGIVPTLQNIVATVTLGCR	55	//14	9//131	0.889	0.5	R.DGTK[425.27]PATTFQSEEDIK[3592.89]R.A	Spt15	1	TBP	DGTKPATTFQSEEDIKR	47	126.127	329801	127.131	211565	2156571	361238	233459	0.646275	-0.62978	-0.62978
						0	2.96897	JL121323_121323_ABP_127_30B.29107.29107.4	P	15.0038	0.441469	0.0658	//15	34//186	14.3945	1.58065	R.AAPESEK[2329.2]DTSATSGIVPTLQNIVATVTLGC[160.03]R.L	Spt15	1	TBP	AAPESEKDTSATSGIVPTLQNIVATVTLGCR	55	//19	7//97	0.60925	0.382353	R.DGTKPATTFQSEEDIK[3592.89]R.A	Spt15	1	TBP	DGTKPATTFQSEEDIKR	47	126.127	162959	127.13	103345	2.34637e+06	178506	114040	0.638856	-0.646438	-0.646438
						-1	1.52816	JL121323_121323_ABP_127_30B.29226.29226.5	N	13.6133	0.420201		1//19	10//126	0.992	0.65625	R.DGTKPATTFQSEEDIK[3592.88]R.A	Spt15	1	TBP	DGTKPATTFQSEEDIKR	47	//15	37//255	12.6212	1.8	R.AAPESEK[2329.19]DTSATSGIVPTLQNIVATVTLGC[160.03]R.L	Spt15	1	TBP	AAPESEKDTSATSGIVPTLQNIVATVTLGCR	55	126.127	148764	127.13	135877	616896	162452	149938	0.922966	-0.115651	-0.115651
						0	0.840318	JL121323_121323_ABP_127_30B.29452.29452.6	P	13.3193	0.396436	0.488	//15	38//255	12.6485	1.72581	R.AAPESEK[2626.38]DTSATSGIVPTLQNIVATVTLGC[160.03]R.L	Spt15	1	TBP	AAPESEKDTSATSGIVPTLQNIVATVTLGCR	55	//14	7//131	0.67075	0.529412	R.DGTK[425.27]PATTFQSEEDIK[3592.89]R.A	Spt15	1	TBP	DGTKPATTFQSEEDIKR	47	126.127	1.35798e+06	127.131	833399	11896074	1.48788e+06	919642	0.618087	-0.694117	-0.694117
						0	2.32953	JL121323_121323_ABP_127_70B.26816.26816.6	P	11.9145	0.345904	0.161	//15	35//255	11.6188	1.5	R.AAPESEK[2329.2]DTSATSGIVPTLQNIVATVTLGC[160.03]R.L	Spt15	1	TBP	AAPESEKDTSATSGIVPTLQNIVATVTLGCR	55	1//19	5//126	0.29575	0.205882	R.DGTKPATTFQSEEDIK[3592.89]R.A	Spt15	1	TBP	DGTKPATTFQSEEDIKR	47	126.127	127844	127.131	103025	859027	139774	113686	0.813355	-0.298043	-0.298043
						0	5.47924	JL121323_121323_ABP_127_50B.30819.30819.6	P	11.7432	0.360815	0.642	//15	33//255	11.2453	1.33871	R.AAPESEK[2626.38]DTSATSGIVPTLQNIVATVTLGC[160.03]R.L	Spt15	1	TBP	AAPESEKDTSATSGIVPTLQNIVATVTLGCR	55	//14	7//131	0.498	0.352941	R.DGTK[425.27]PATTFQSEEDIK[3592.89]R.A	Spt15	1	TBP	DGTKPATTFQSEEDIKR	47	126.127	577092	127.131	308846	4928658	632846	340806	0.538529	-0.892904	-0.892904
						-1	-0.156001	JL121323_121323_ABP_127_100B.23341.23341.5	P	11.3577	0.344451	0.267	//15	31//255	11.2335	1.35484	R.AAPESEK[2626.38]DTSATSGIVPTLQNIVATVTLGC[160.03]R.L	Spt15	1	TBP	AAPESEKDTSATSGIVPTLQNIVATVTLGCR	55	//14	3//131	0.12425	0.0882353	R.DGTK[425.27]PATTFQSEEDIK[3592.89]R.A	Spt15	1	TBP	DGTKPATTFQSEEDIKR	47	126.127	43613.6	127.131	28070.3	222384	47769.7	30975.2	0.648427	-0.624985	-0.624985
						0	-4.05632	JL121323_121323_ABP_127_100B.23377.23377.6	P	11.2238	0.330363	0.000307	//15	33//255	10.5777	1.37097	R.AAPESEK[2626.38]DTSATSGIVPTLQNIVATVTLGC[160.03]R.L	Spt15	1	TBP	AAPESEKDTSATSGIVPTLQNIVATVTLGCR	55	//14	7//131	0.646	0.441176	R.DGTK[425.27]PATTFQSEEDIK[3592.89]R.A	Spt15	1	TBP	DGTKPATTFQSEEDIKR	47	126.127	55018.9	127.131	33127.1	414583	60289.7	36555.2	0.606326	-0.721836	-0.721836
						0	4.07794	JL121323_121323_ABP_127_D.26982.26982.6	N	10.333	0.298517		//14	9//99	1.19925	0.78125	R.DGTK[425.27]PATTFQSEEDIK[3592.91]R.A	Spt15	1	TBP	DGTKPATTFQSEEDIKR	47	//15	29//186	9.13375	1.26667	R.AAPESEK[2626.4]DTSATSGIVPTLQNIVATVTLGC[160.03]R.L	Spt15	1	TBP	AAPESEKDTSATSGIVPTLQNIVATVTLGCR	55	126.128	315307	127.131	207016	2.61194e+06	345305	228439	0.661558	-0.59606	-0.59606
						-1	3.37454	JL121323_121323_ABP_127_50B.31194.31194.6	P	10.1055	0.315526	0.512	//15	30//255	9.75975	1.17742	R.AAPESEK[2626.38]DTSATSGIVPTLQNIVATVTLGC[160.03]R.L	Spt15	1	TBP	AAPESEKDTSATSGIVPTLQNIVATVTLGCR	55	//14	5//131	0.34575	0.205882	R.DGTK[425.27]PATTFQSEEDIK[3592.89]R.A	Spt15	1	TBP	DGTKPATTFQSEEDIKR	47	126.127	200121	127.13	155802	892540	218864	171925	0.785535	-0.348253	-0.348253
						0	2.51548	JL121323_121323_ABP_127_100B.23317.23317.6	P	10.0098	0.274236	0.0358	//15	29//255	9.72175	1.20968	R.AAPESEK[2626.38]DTSATSGIVPTLQNIVATVTLGC[160.03]R.L	Spt15	1	TBP	AAPESEKDTSATSGIVPTLQNIVATVTLGCR	55	//14	3//131	0.288	0.147059	R.DGTK[425.27]PATTFQSEEDIK[3592.89]R.A	Spt15	1	TBP	DGTKPATTFQSEEDIKR	47	126.127	23121.7	127.13	16246.9	117325	25308.5	17928.1	0.708385	-0.497394	-0.497394
						-2	0.709624	JL121323_121323_ABP_127_70B.27158.27158.7	N	9.2915	0.269256		//14	8//99	1.6875	0.65625	R.DGTK[425.27]PATTFQSEEDIK[3592.89]R.A	Spt15	1	TBP	DGTKPATTFQSEEDIKR	47	//15	23//186	7.604	0.916667	R.AAPESEK[2626.38]DTSATSGIVPTLQNIVATVTLGC[160.03]R.L	Spt15	1	TBP	AAPESEKDTSATSGIVPTLQNIVATVTLGCR	55	126.127	36371.6	127.13	31800.8	104946	39735.6	35091.6	0.883129	-0.179304	-0.179304
						-3	0.988578	JL121323_121323_ABP_127_30B.29556.29556.7	N	8.76175	0.252759		//14	9//99	1.84675	0.78125	R.DGTK[425.27]PATTFQSEEDIK[3592.88]R.A	Spt15	1	TBP	DGTKPATTFQSEEDIKR	47	//15	21//186	6.915	0.85	R.AAPESEK[2626.37]DTSATSGIVPTLQNIVATVTLGC[160.03]R.L	Spt15	1	TBP	AAPESEKDTSATSGIVPTLQNIVATVTLGCR	55	126.127	81379.2	127.131	59748.1	333343	89044.6	65931.1	0.740427	-0.43357	-0.43357
						-1	0.755032	JL121323_121323_ABP_127_50B.30847.30847.7	N	8.516	0.259931		//14	8//99	1.2095	0.5625	R.DGTK[425.27]PATTFQSEEDIK[3592.89]R.A	Spt15	1	TBP	DGTKPATTFQSEEDIKR	47	//15	19//186	7.3065	0.816667	R.AAPESEK[2626.38]DTSATSGIVPTLQNIVATVTLGC[160.03]R.L	Spt15	1	TBP	AAPESEKDTSATSGIVPTLQNIVATVTLGCR	55	126.128	91836.5	127.131	72758.2	289510	100422	80287.5	0.799501	-0.322829	-0.322829
						0	-1.93015	JL121323_121323_ABP_127_30B.29801.29801.6	P	8.30075	0.239032	0.682	//15	22//255	7.81925	0.870968	R.AAPESEK[2626.38]DTSATSGIVPTLQNIVATVTLGC[160.03]R.L	Spt15	1	TBP	AAPESEKDTSATSGIVPTLQNIVATVTLGCR	55	//14	6//131	0.4815	0.235294	R.DGTK[425.27]PATTFQSEEDIK[3592.89]R.A	Spt15	1	TBP	DGTKPATTFQSEEDIKR	47	126.127	121384	127.131	129378	252115	132329	142767	1.07888	0.109536	0.109536
						-1	2.33327	JL121323_121323_ABP_127_70B.27192.27192.7	N	8.20425	0.230777		1//14	9//99	1.21025	0.59375	R.DGTK[425.27]PATTFQSEEDIK[3592.9]R.A	Spt15	1	TBP	DGTKPATTFQSEEDIKR	47	//15	19//186	6.994	0.816667	R.AAPESEK[2626.39]DTSATSGIVPTLQNIVATVTLGC[160.03]R.L	Spt15	1	TBP	AAPESEKDTSATSGIVPTLQNIVATVTLGCR	55	126.127	39750.3	127.131	34331.8	90272.5	43431.9	37884.6	0.872275	-0.197144	-0.197144
						-5	5.90037	JL121323_121323_ABP_127_70B.27088.27088.5	P	6.941	0.189296	0.0267	//15	17//255	6.59925	0.66129	R.AAPESEK[2626.38]DTSATSGIVPTLQNIVATVTLGC[160.03]R.L	Spt15	1	TBP	AAPESEKDTSATSGIVPTLQNIVATVTLGCR	55	//14	4//131	0.34175	0.176471	R.DGTK[425.27]PATTFQSEEDIK[3592.89]R.A	Spt15	1	TBP	DGTKPATTFQSEEDIKR	47	126.128	135822	127.132	92438.9	399896	148705	102005	0.685956	-0.543812	-0.543812
	74	TBP:47---TBP:8	8.14	-0.282995	0.282995
						0	-0.306817	JL121323_121323_ABP_127_30B.08640.08640.4	NP	8.14	0.268847	0.00112	1//19	22//104	6.699	1.58824	R.DGTKPATTFQSEEDIK[1070.66]R.A	Spt15	1	TBP	DGTKPATTFQSEEDIKR	47	//5	5//19	1.441	1.2	R.LK[2329.2]EFK.E	Spt15	1	TBP	LKEFK	8	126.128	569966	127.131	373513	2.84168e+06	624200	412165	0.66031	-0.598784	-0.598784
						0	7.56826	JL121323_121323_ABP_127_50B.10904.10904.5	P	7.66775	0.252819	0.35	//14	18//138	6.91925	1.32353	R.DGTK[425.27]PATTFQSEEDIK[1070.66]R.A	Spt15	1	TBP	DGTKPATTFQSEEDIKR	47	//5	3//24	0.7485	0.8	R.LK[2626.38]EFK.E	Spt15	1	TBP	LKEFK	8	126.127	773201	127.131	734835	804847	844000	810878	0.960757	-0.0577567	-0.0577567
						1580	-106.668	JL121323_121323_ABP_127_50B.10930.10930.3	P	4.07625	0.125129	0.679	//14	10//74	3.12225	0.676471	R.DGTK[425.27]PATTFQSEEDIK[1070.66]R.A	Spt15	1	TBP	DGTKPATTFQSEEDIKR	47	//5	3//14	0.954	0.8	R.LK[2626.38]EFK.E	Spt15	1	TBP	LKEFK	8	126.128	494479	127.131	428455	494479	540260	472794	0.875122	-0.192444	-0.192444
	75	TBP:47---TBP:83	8.66825	-1.1139	1.1139
						0	2.16736	JL121323_121323_ABP_127_30B.13396.13396.5	NP	8.66825	0.272737	0.0596	//14	21//133	7.1115	1.55882	R.DGTK[425.27]PATTFQSEEDIK[1643]R.A	Spt15	1	TBP	DGTKPATTFQSEEDIKR	47	//13	7//62	1.55675	0.818182	R.LDLK[2626.38]TVALHAR.N	Spt15	1	TBP	LDLKTVALHAR	83	126.128	2.22374e+06	127.131	1.14009e+06	3898192	2.43918e+06	1.25807e+06	0.515775	-0.955188	-0.955188
						-1	1.13788	JL121323_121323_ABP_127_30B.13043.13043.5	N	8.6255	0.286695		2//13	16//62	3.6955	1.85	R.LDLK[2626.37]TVALHAR.N	Spt15	1	TBP	LDLKTVALHAR	83	//15	16//130	4.93	1.3125	R.DGTK[1642.99]PATTFQSEEDIK[425.27]R.A	Spt15	1	TBP	DGTKPATTFQSEEDIKR	47	126.127	1208789	127.13	725045	1.38192e+06	1.32462e+06	800076	0.604002	-0.727374	-0.727374
						0	1.62424	JL121323_121323_ABP_127_30B.13029.13029.6	N	7.67775	0.310834		//13	8//50	2.61025	1.25	R.LDLK[2626.38]TVALHAR.N	Spt15	1	TBP	LDLKTVALHAR	83	//15	17//99	5.0675	1.40625	R.DGTK[1643]PATTFQSEEDIK[425.27]R.A	Spt15	1	TBP	DGTKPATTFQSEEDIKR	47	126.127	1.15814e+06	127.131	616165	2302619	1.27007e+06	679928	0.535347	-0.901455	-0.901455
						-1	2.96119	JL121323_121323_ABP_127_30B.13429.13429.7	NP	6.3685	0.220745	0.0509	//14	13//133	3.99825	0.882353	R.DGTK[425.27]PATTFQSEEDIK[1643]R.A	Spt15	1	TBP	DGTKPATTFQSEEDIKR	47	//13	8//62	2.37025	1	R.LDLK[2626.38]TVALHAR.N	Spt15	1	TBP	LDLKTVALHAR	83	126.128	711672	127.131	253991	2.05861e+06	781970	280275	0.358421	-1.48027	-1.48027
						-2	0.756154	JL121323_121323_ABP_127_30B.13374.13374.7	N	6.06075	0.197467		//13	7//50	2.38875	1.05	R.LDLK[2626.37]TVALHAR.N	Spt15	1	TBP	LDLKTVALHAR	83	//14	9//101	3.672	0.75	R.DGTK[425.27]PATTFQSEEDIK[1642.99]R.A	Spt15	1	TBP	DGTKPATTFQSEEDIKR	47	126.128	928725	127.131	320613	2.57338e+06	1.0206e+06	353791	0.346651	-1.52844	-1.52844
						-2	0.984871	JL121323_121323_ABP_127_30B.13330.13330.7	N	6.05575	0.210338		//13	7//50	2.377	1.05	R.LDLK[2626.37]TVALHAR.N	Spt15	1	TBP	LDLKTVALHAR	83	//14	10//101	3.67875	0.78125	R.DGTK[425.27]PATTFQSEEDIK[1642.99]R.A	Spt15	1	TBP	DGTKPATTFQSEEDIKR	47	126.128	651262	127.131	212743	1818259	715833	234758	0.327951	-1.60845	-1.60845
						-1	2.91571	JL121323_121323_ABP_127_30B.13384.13384.6	NP	5.8455	0.200007	0.691	//14	17//133	4.59	1.11765	R.DGTK[425.27]PATTFQSEEDIK[1643]R.A	Spt15	1	TBP	DGTKPATTFQSEEDIKR	47	//13	8//62	1.2555	0.863636	R.LDLK[2626.38]TVALHAR.N	Spt15	1	TBP	LDLKTVALHAR	83	126.128	3.26444e+06	127.131	1.61953e+06	5888778	3.58138e+06	1.78712e+06	0.499005	-1.00287	-1.00287
						-1	2.02025	JL121323_121323_ABP_127_30B.13487.13487.5	NP	5.68025	0.20496	0.405	1//14	20//133	4.51625	1.38235	R.DGTK[425.27]PATTFQSEEDIK[1643]R.A	Spt15	1	TBP	DGTKPATTFQSEEDIKR	47	//13	7//62	1.164	0.636364	R.LDLK[2626.38]TVALHAR.N	Spt15	1	TBP	LDLKTVALHAR	83	126.128	1.53183e+06	127.131	931711	2.06704e+06	1.67847e+06	1.02813e+06	0.61254	-0.707125	-0.707125
	76	TBP:47---TBP:97	6.462	-0.0769164	0.0769164
						0	2.44209	JL121323_121323_ABP_127_50B.07940.07940.5	N	6.462	0.177243		//10	6//41	2.298	1.14286	R.NAEYNPK[2329.21]R.F	Spt15	1	TBP	NAEYNPKR	97	1//19	14//130	4.164	1.1875	R.DGTKPATTFQSEEDIK[1397.76]R.A	Spt15	1	TBP	DGTKPATTFQSEEDIKR	47	126.128	623611	127.131	584930	823175	680806	645460	0.948082	-0.0769164	-0.0769164
	77	TBP:55---TBP:8	13.032	-0.00347247	0.00347247
						-2	2.36657	JL121323_121323_ABP_127_30B.27785.27785.5	P	13.032	0.384158	0.11	//15	35//255	12.6105	1.51613	R.AAPESEK[1512.87]DTSATSGIVPTLQNIVATVTLGC[160.03]R.L	Spt15	1	TBP	AAPESEKDTSATSGIVPTLQNIVATVTLGCR	55	//9	5//48	0.4215	0.666667	R.LK[3592.89]EFKEANK.I	Spt15	1	TBP	LKEFKEANK	8	126.128	274600	127.131	270872	556282	299623	298903	0.997596	-0.00347247	-0.00347247
	78	TBP:55---TBP:83	18.4788	-0.0344879	0.0344879
						-2	1.11795	JL121323_121323_ABP_127_30B.31068.31068.4	P	18.4788	0.561536	0.102	//15	45//186	17.932	2.33871	R.AAPESEK[1643]DTSATSGIVPTLQNIVATVTLGC[160.03]R.L	Spt15	1	TBP	AAPESEKDTSATSGIVPTLQNIVATVTLGCR	55	//13	5//50	0.54675	0.454545	R.LDLK[3592.89]TVALHAR.N	Spt15	1	TBP	LDLKTVALHAR	83	126.127	149304	127.131	127242	445890	163153	140409	0.860599	-0.216587	-0.216587
						-1	2.69644	JL121323_121323_ABP_127_50B.32214.32214.6	NP	14.7402	0.426493	0.00232	//15	37//255	13.0642	1.59677	R.AAPESEK[1643]DTSATSGIVPTLQNIVATVTLGC[160.03]R.L	Spt15	1	TBP	AAPESEKDTSATSGIVPTLQNIVATVTLGCR	55	//13	8//62	1.676	1.13636	R.LDLK[3592.89]TVALHAR.N	Spt15	1	TBP	LDLKTVALHAR	83	126.127	61776.1	127.13	60548.1	206666	67410.4	66813.8	0.991151	-0.0128234	-0.0128234
						-2	3.12776	JL121323_121323_ABP_127_D.27865.27865.5	P	14.1047	0.387802	0.153	//15	39//255	13.6668	1.70968	R.AAPESEK[1643]DTSATSGIVPTLQNIVATVTLGC[160.03]R.L	Spt15	1	TBP	AAPESEKDTSATSGIVPTLQNIVATVTLGCR	55	//13	6//62	0.438	0.454545	R.LDLK[3592.89]TVALHAR.N	Spt15	1	TBP	LDLKTVALHAR	83	126.128	80620.3	127.131	71961.7	229594	88059	79408.5	0.901765	-0.149176	-0.149176
						0	1.34885	JL121323_121323_ABP_127_30B.30983.30983.5	P	13.7035	0.386624	0.000687	//15	37//255	13.2498	1.6129	R.AAPESEK[1643]DTSATSGIVPTLQNIVATVTLGC[160.03]R.L	Spt15	1	TBP	AAPESEKDTSATSGIVPTLQNIVATVTLGCR	55	//13	7//62	0.45375	0.545455	R.LDLK[3592.89]TVALHAR.N	Spt15	1	TBP	LDLKTVALHAR	83	126.127	173367	127.131	168181	488289	189200	185585	0.980895	-0.0278296	-0.0278296
						0	-4.26339	JL121323_121323_ABP_127_50B.32187.32187.6	NP	13.41	0.39599	0.000323	//15	40//255	12.2043	1.70968	R.AAPESEK[1643]DTSATSGIVPTLQNIVATVTLGC[160.03]R.L	Spt15	1	TBP	AAPESEKDTSATSGIVPTLQNIVATVTLGCR	55	//13	9//62	1.20575	0.909091	R.LDLK[3592.89]TVALHAR.N	Spt15	1	TBP	LDLKTVALHAR	83	126.127	57303.9	127.13	57175.2	131840	62518	63091.9	1.00918	0.0131826	0.0131826
						-2	0.206191	JL121323_121323_ABP_127_70B.27925.27925.5	P	13.1992	0.381173	0.493	//15	35//255	12.8618	1.45161	R.AAPESEK[1643]DTSATSGIVPTLQNIVATVTLGC[160.03]R.L	Spt15	1	TBP	AAPESEKDTSATSGIVPTLQNIVATVTLGCR	55	//13	5//62	0.3375	0.318182	R.LDLK[3592.89]TVALHAR.N	Spt15	1	TBP	LDLKTVALHAR	83	126.128	46381.3	127.131	43448	155485	50635.8	47944.1	0.946841	-0.0788053	-0.0788053
						-2	1.32005	JL121323_121323_ABP_127_70B.27924.27924.6	NP	10.9942	0.368452	1.43e-12	//15	32//255	9.55875	1.25806	R.AAPESEK[1643]DTSATSGIVPTLQNIVATVTLGC[160.03]R.L	Spt15	1	TBP	AAPESEKDTSATSGIVPTLQNIVATVTLGCR	55	//13	9//62	1.4355	0.863636	R.LDLK[3592.89]TVALHAR.N	Spt15	1	TBP	LDLKTVALHAR	83	126.127	26476.3	127.13	25815.7	68027.9	28892.7	28487.2	0.985966	-0.0203896	-0.0203896
						-2	2.56659	JL121323_121323_ABP_127_30B.31249.31249.6	P	10.6155	0.356285	0.0533	//15	33//255	9.5655	1.33871	R.AAPESEK[1643]DTSATSGIVPTLQNIVATVTLGC[160.03]R.L	Spt15	1	TBP	AAPESEKDTSATSGIVPTLQNIVATVTLGCR	55	//13	7//62	1.05	0.545455	R.LDLK[3592.89]TVALHAR.N	Spt15	1	TBP	LDLKTVALHAR	83	126.127	76540	127.13	76669	108406	83500.7	84602.9	1.0132	0.0189196	0.0189196
						0	3.917	JL121323_121323_ABP_127_30B.31214.31214.6	P	9.78325	0.336976	0.000371	//15	35//255	8.95725	1.29032	R.AAPESEK[1643]DTSATSGIVPTLQNIVATVTLGC[160.03]R.L	Spt15	1	TBP	AAPESEKDTSATSGIVPTLQNIVATVTLGCR	55	//13	6//62	0.826	0.5	R.LDLK[3592.89]TVALHAR.N	Spt15	1	TBP	LDLKTVALHAR	83	126.127	91166.7	127.131	100803	242424	99342.3	111234	1.1197	0.163117	0.163117
	79	TBP:55---TBP:97	19.521	-0.551686	0.551686
						0	6.03103	JL121323_121323_ABP_127_30B.29217.29217.4	P	19.521	0.569291	0.405	//15	49//187	19.3635	2.3871	R.AAPESEK[1397.75]DTSATSGIVPTLQNIVATVTLGC[160.03]R.L	Spt15	1	TBP	AAPESEKDTSATSGIVPTLQNIVATVTLGCR	55	//10	3//33	0.1575	0.3125	R.NAEYNPK[3592.89]R.F	Spt15	1	TBP	NAEYNPKR	97	126.127	322892	127.131	188726	1.41182e+06	353893	208256	0.588471	-0.764958	-0.764958
						0	0.835934	JL121323_121323_ABP_127_70B.26891.26891.5	P	18.0665	0.494796	0.00011	//15	47//256	17.871	2.29032	R.AAPESEK[1397.75]DTSATSGIVPTLQNIVATVTLGC[160.03]R.L	Spt15	1	TBP	AAPESEKDTSATSGIVPTLQNIVATVTLGCR	55	//10	4//41	0.1955	0.375	R.NAEYNPK[3592.89]R.F	Spt15	1	TBP	NAEYNPKR	97	126.127	172169	127.131	100256	1.25571e+06	188704	110631	0.586266	-0.770373	-0.770373
						0	1.42799	JL121323_121323_ABP_127_70B.26860.26860.4	P	17.9333	0.486986	0.582	//15	41//187	17.77	1.95161	R.AAPESEK[1397.75]DTSATSGIVPTLQNIVATVTLGC[160.03]R.L	Spt15	1	TBP	AAPESEKDTSATSGIVPTLQNIVATVTLGCR	55	//10	3//33	0.16325	0.3125	R.NAEYNPK[3592.89]R.F	Spt15	1	TBP	NAEYNPKR	97	126.127	87621.3	127.131	69875.9	285651	95807.2	77106.9	0.804814	-0.313273	-0.313273
						0	-2.40787	JL121323_121323_ABP_127_50B.30613.30613.4	P	17.867	0.51353	0.61	//15	39//187	17.7207	1.8871	R.AAPESEK[1397.75]DTSATSGIVPTLQNIVATVTLGC[160.03]R.L	Spt15	1	TBP	AAPESEKDTSATSGIVPTLQNIVATVTLGCR	55	//10	3//33	0.14625	0.3125	R.NAEYNPK[3592.89]R.F	Spt15	1	TBP	NAEYNPKR	97	126.127	234695	127.131	157589	797087	256981	173896	0.67669	-0.563434	-0.563434
						0	2.54837	JL121323_121323_ABP_127_30B.29187.29187.5	P	17.8597	0.493793	0.193	//15	46//256	17.7757	2.25806	R.AAPESEK[1397.75]DTSATSGIVPTLQNIVATVTLGC[160.03]R.L	Spt15	1	TBP	AAPESEKDTSATSGIVPTLQNIVATVTLGCR	55	//10	2//41	0.084	0.125	R.NAEYNPK[3592.89]R.F	Spt15	1	TBP	NAEYNPKR	97	126.127	318659	127.131	246668	1.41037e+06	348520	272194	0.781	-0.356605	-0.356605
						0	-2.07908	JL121323_121323_ABP_127_30B.29310.29310.4	P	17.7362	0.498447	0.535	//15	39//187	17.653	1.98387	R.AAPESEK[1397.75]DTSATSGIVPTLQNIVATVTLGC[160.03]R.L	Spt15	1	TBP	AAPESEKDTSATSGIVPTLQNIVATVTLGCR	55	//10	2//33	0.08325	0.125	R.NAEYNPK[3592.89]R.F	Spt15	1	TBP	NAEYNPKR	97	126.127	334361	127.13	222104	1.01441e+06	366140	245088	0.669383	-0.579097	-0.579097
						0	5.26386	JL121323_121323_ABP_127_70B.26906.26906.4	P	17.6842	0.506212	5.96e-05	//15	44//187	17.5065	2.09677	R.AAPESEK[1397.75]DTSATSGIVPTLQNIVATVTLGC[160.03]R.L	Spt15	1	TBP	AAPESEKDTSATSGIVPTLQNIVATVTLGCR	55	//10	3//33	0.17775	0.3125	R.NAEYNPK[3592.89]R.F	Spt15	1	TBP	NAEYNPKR	97	126.127	192063	127.131	108954	1.05264e+06	210544	120229	0.571038	-0.808341	-0.808341
						0	4.1679	JL121323_121323_ABP_127_30B.29176.29176.4	P	17.3212	0.52971	0.701	//15	40//187	17.1908	2	R.AAPESEK[1397.75]DTSATSGIVPTLQNIVATVTLGC[160.03]R.L	Spt15	1	TBP	AAPESEKDTSATSGIVPTLQNIVATVTLGCR	55	//10	3//33	0.1305	0.3125	R.NAEYNPK[3592.89]R.F	Spt15	1	TBP	NAEYNPKR	97	126.127	170303	127.13	134002	416758	186235	147869	0.793989	-0.332809	-0.332809
						0	2.95936	JL121323_121323_ABP_127_50B.30598.30598.5	P	16.6415	0.494709	0.0136	//15	40//256	16.248	1.96774	R.AAPESEK[1397.75]DTSATSGIVPTLQNIVATVTLGC[160.03]R.L	Spt15	1	TBP	AAPESEKDTSATSGIVPTLQNIVATVTLGCR	55	//10	5//41	0.3935	0.8125	R.NAEYNPK[3592.89]R.F	Spt15	1	TBP	NAEYNPKR	97	126.127	263352	127.131	201886	1.32666e+06	288054	222778	0.773389	-0.370733	-0.370733
						0	5.90475	JL121323_121323_ABP_127_30B.29328.29328.5	P	13.503	0.402996	0.641	//15	35//256	13.2495	1.51613	R.AAPESEK[1397.75]DTSATSGIVPTLQNIVATVTLGC[160.03]R.L	Spt15	1	TBP	AAPESEKDTSATSGIVPTLQNIVATVTLGCR	55	//10	4//41	0.2535	0.375	R.NAEYNPK[3592.89]R.F	Spt15	1	TBP	NAEYNPKR	97	126.127	292773	127.131	262141	1.13508e+06	319777	289268	0.904594	-0.144658	-0.144658
						-1	3.06122	JL121323_121323_ABP_127_30B.29279.29279.3	P	6.491	0.259453	0.763	//15	16//118	6.2625	0.709677	R.AAPESEK[1397.75]DTSATSGIVPTLQNIVATVTLGC[160.03]R.L	Spt15	1	TBP	AAPESEKDTSATSGIVPTLQNIVATVTLGCR	55	//10	3//25	0.2285	0.3125	R.NAEYNPK[3592.89]R.F	Spt15	1	TBP	NAEYNPKR	97	126.127	156590	127.131	74466.9	1.55491e+06	171832	82173	0.478216	-1.06426	-1.06426
	80	TBP:8---TBP:97	2.94675	-0.27055	0.27055
						0	2.27414	JL121323_121323_ABP_127_30B.06762.06762.3	P	2.94675	0.102234	0.00413	//10	7//31	0.63325	0.875	R.NAEYNPK[1070.66]R.F	Spt15	1	TBP	NAEYNPKR	97	//5	6//17	2.3135	1.6	R.LK[1397.75]EFK.E	Spt15	1	TBP	LKEFK	8	126.128	105910	127.131	71351.5	587332	115964	78735.2	0.678964	-0.558594	-0.558594
						3	-129.146	JL121323_121323_ABP_127_30B.06773.06773.4	P	2.71125	0.0960397	0.0424	1//10	8//39	2.02725	0.9375	R.NAEYNPK[1070.66]R.F	Spt15	1	TBP	NAEYNPKR	97	//5	3//22	0.684	0.8	R.LK[1397.75]EFK.E	Spt15	1	TBP	LKEFK	8	126.127	59246.8	127.131	59288.6	78626.2	64635.5	65424	1.0122	0.0174926	0.0174926
	81	TBP:83---TBP:97	9.566	-0.763766	0.763766
						0	4.05277	JL121323_121323_ABP_127_30B.42361.42361.4	NP	9.566	0.433154	0.15	//13	19//53	7.91025	2.36364	R.LDLK[1397.75]TVALHAR.N	Spt15	1	TBP	LDLKTVALHAR	83	//10	6//35	1.65575	0.8125	R.NAEYNPK[1643]R.F	Spt15	1	TBP	NAEYNPKR	97	126.127	28886.7	127.131	15849.4	121168	31672.8	17489.6	0.552196	-0.856748	-0.856748
						0	1.81151	JL121323_121323_ABP_127_30B.09973.09973.4	NP	9.498	0.302301	0.000572	//13	20//53	7.208	2.72727	R.LDLK[1397.75]TVALHAR.N	Spt15	1	TBP	LDLKTVALHAR	83	//10	8//35	2.29	1.5	R.NAEYNPK[1643]R.F	Spt15	1	TBP	NAEYNPKR	97	126.128	23310024	127.131	10516533	126233736	2.55859e+07	1.16048e+07	0.453564	-1.14062	-1.14062
						-1255	-53.4998	JL121323_121323_ABP_127_30B.41818.41818.6	P	9.3705	0.445239	0.759	//13	22//65	7.67375	2.72727	R.LDLK[1397.75]TVALHAR.N	Spt15	1	TBP	LDLKTVALHAR	83	//10	7//43	1.69675	0.875	R.NAEYNPK[1643]R.F	Spt15	1	TBP	NAEYNPKR	97	126.128	12500.7	127.131	6839.08	210286	13706.6	7546.81	0.550597	-0.860931	-0.860931
						0	1.81151	JL121323_121323_ABP_127_1ug.10916.10916.4	NP	9.2025	0.32026	0.0825	//13	20//53	7.1695	2.59091	R.LDLK[1397.75]TVALHAR.N	Spt15	1	TBP	LDLKTVALHAR	83	//10	8//35	2.033	1.3125	R.NAEYNPK[1643]R.F	Spt15	1	TBP	NAEYNPKR	97	126.128	4390188	127.131	2.35154e+06	22009954	4.81431e+06	2.59489e+06	0.538995	-0.891655	-0.891655
						0	2.59108	JL121323_121323_ABP_127_30B.43011.43011.4	NP	9.11675	0.342252	0.0421	//13	21//53	7.472	2.77273	R.LDLK[1397.75]TVALHAR.N	Spt15	1	TBP	LDLKTVALHAR	83	//10	6//35	1.64475	0.8125	R.NAEYNPK[1643]R.F	Spt15	1	TBP	NAEYNPKR	97	126.128	44646.1	127.131	26899.4	187523	48923	29683	0.606729	-0.720875	-0.720875
						0	5.8068	JL121323_121323_ABP_127_30B.42205.42205.4	NP	9.06125	0.391026	0.18	//13	19//53	7.4335	2.36364	R.LDLK[1397.75]TVALHAR.N	Spt15	1	TBP	LDLKTVALHAR	83	//10	6//35	1.62775	0.8125	R.NAEYNPK[1643]R.F	Spt15	1	TBP	NAEYNPKR	97	126.127	23202.7	127.131	13848.7	109695	25427	15281.8	0.601006	-0.734548	-0.734548
						0	1.81151	JL121323_121323_ABP_127_30B.09709.09709.4	NP	9.04725	0.26249	0.000101	//13	21//53	7.18625	2.77273	R.LDLK[1397.75]TVALHAR.N	Spt15	1	TBP	LDLKTVALHAR	83	//10	6//35	1.861	1	R.NAEYNPK[1643]R.F	Spt15	1	TBP	NAEYNPKR	97	126.128	3.4349e+06	127.131	1.91995e+06	14789046	3.76576e+06	2.11863e+06	0.562604	-0.829809	-0.829809
						0	2.21688	JL121323_121323_ABP_127_1ug.10689.10689.4	N	8.8925	0.273683		//10	7//35	1.81475	1.21429	R.NAEYNPK[1643]R.F	Spt15	1	TBP	NAEYNPKR	97	//13	20//53	7.07775	3.05	R.LDLK[1397.76]TVALHAR.N	Spt15	1	TBP	LDLKTVALHAR	83	126.127	1008905	127.131	606163	3043447	1.10557e+06	668890	0.605017	-0.724952	-0.724952
						0	1.92454	JL121323_121323_ABP_127_D.12233.12233.4	N	8.83275	0.308142		//10	6//35	1.721	0.928571	R.NAEYNPK[1643]R.F	Spt15	1	TBP	NAEYNPKR	97	//13	20//53	7.11175	2.85	R.LDLK[1397.75]TVALHAR.N	Spt15	1	TBP	LDLKTVALHAR	83	126.127	232482	127.131	144933	805755	254694	159931	0.627935	-0.671314	-0.671314
						-1	4.44256	JL121323_121323_ABP_127_30B.37862.37862.4	NP	8.6885	0.397034	0.244	//13	20//53	7.2895	2.63636	R.LDLK[1397.75]TVALHAR.N	Spt15	1	TBP	LDLKTVALHAR	83	//10	6//35	1.399	0.8125	R.NAEYNPK[1643]R.F	Spt15	1	TBP	NAEYNPKR	97	126.127	20452.5	127.131	13301.8	81594.9	22399.9	14678.4	0.655288	-0.609799	-0.609799
						0	1.22684	JL121323_121323_ABP_127_50B.11410.11410.4	NP	8.4835	0.339218	0.0728	//13	20//53	7.04	2.72727	R.LDLK[1397.75]TVALHAR.N	Spt15	1	TBP	LDLKTVALHAR	83	//10	5//35	1.4435	0.625	R.NAEYNPK[1643]R.F	Spt15	1	TBP	NAEYNPKR	97	126.127	1.38523e+06	127.131	1.16098e+06	3.48998e+06	1.51396e+06	1.28113e+06	0.846206	-0.240919	-0.240919
						0	1.42173	JL121323_121323_ABP_127_30B.44304.44304.4	NP	8.44825	0.339131	0.288	//13	20//53	6.81175	2.63636	R.LDLK[1397.75]TVALHAR.N	Spt15	1	TBP	LDLKTVALHAR	83	//10	6//35	1.6365	0.8125	R.NAEYNPK[1643]R.F	Spt15	1	TBP	NAEYNPKR	97	126.127	49273	127.131	34178.1	192179	53938.5	37714.9	0.699221	-0.51618	-0.51618
						0	3.85788	JL121323_121323_ABP_127_30B.44128.44128.4	NP	8.44125	0.3449	0.391	//13	19//53	6.97225	2.40909	R.LDLK[1397.75]TVALHAR.N	Spt15	1	TBP	LDLKTVALHAR	83	//10	6//35	1.469	0.8125	R.NAEYNPK[1643]R.F	Spt15	1	TBP	NAEYNPKR	97	126.127	56966.2	127.131	38966.3	232937	62366.8	42998.6	0.689448	-0.536487	-0.536487
						0	2.39619	JL121323_121323_ABP_127_30B.43450.43450.4	NP	8.39125	0.334326	0.385	//13	21//53	6.8385	2.72727	R.LDLK[1397.75]TVALHAR.N	Spt15	1	TBP	LDLKTVALHAR	83	//10	6//35	1.55275	0.8125	R.NAEYNPK[1643]R.F	Spt15	1	TBP	NAEYNPKR	97	126.128	53300.8	127.131	34257.8	205525	58380.6	37802.9	0.647524	-0.626993	-0.626993
						0	-2.37867	JL121323_121323_ABP_127_30B.43112.43112.4	NP	8.239	0.327575	0.448	//13	20//53	6.72925	2.77273	R.LDLK[1397.75]TVALHAR.N	Spt15	1	TBP	LDLKTVALHAR	83	//10	6//35	1.50975	0.8125	R.NAEYNPK[1643]R.F	Spt15	1	TBP	NAEYNPKR	97	126.128	46430.5	127.131	27757.9	177996	50881	30630.4	0.602002	-0.73216	-0.73216
						0	2.49364	JL121323_121323_ABP_127_30B.43961.43961.4	NP	8.19475	0.319907	0.473	//13	19//53	6.738	2.54545	R.LDLK[1397.75]TVALHAR.N	Spt15	1	TBP	LDLKTVALHAR	83	//10	5//35	1.45675	0.625	R.NAEYNPK[1643]R.F	Spt15	1	TBP	NAEYNPKR	97	126.128	49612.9	127.131	33473.3	190980	54322	36937.2	0.679968	-0.556461	-0.556461
						0	-1.69655	JL121323_121323_ABP_127_30B.40087.40087.4	NP	8.191	0.411081	0.0429	//13	19//53	6.80575	2.36364	R.LDLK[1397.75]TVALHAR.N	Spt15	1	TBP	LDLKTVALHAR	83	//10	5//35	1.38525	0.625	R.NAEYNPK[1643]R.F	Spt15	1	TBP	NAEYNPKR	97	126.127	16910.6	127.131	10457	75225	18527.3	11539.1	0.622816	-0.683122	-0.683122
						0	1.81151	JL121323_121323_ABP_127_30B.43623.43623.4	NP	8.17325	0.322569	0.227	//13	20//53	6.6245	2.54545	R.LDLK[1397.75]TVALHAR.N	Spt15	1	TBP	LDLKTVALHAR	83	//10	6//35	1.54875	0.8125	R.NAEYNPK[1643]R.F	Spt15	1	TBP	NAEYNPKR	97	126.128	56608.5	127.131	36899.6	223543	61997.3	40718.1	0.656772	-0.606536	-0.606536
						0	3.37065	JL121323_121323_ABP_127_30B.43795.43795.4	NP	8.09125	0.294597	0.453	//13	17//53	6.71425	2.13636	R.LDLK[1397.75]TVALHAR.N	Spt15	1	TBP	LDLKTVALHAR	83	//10	6//35	1.377	0.8125	R.NAEYNPK[1643]R.F	Spt15	1	TBP	NAEYNPKR	97	126.128	49288.9	127.131	33505.2	167514	53964.2	36972.5	0.685129	-0.545553	-0.545553
						0	4.24767	JL121323_121323_ABP_127_30B.43241.43241.4	NP	8.06	0.300634	0.399	1//13	20//53	6.7065	2.63636	R.LDLK[1397.75]TVALHAR.N	Spt15	1	TBP	LDLKTVALHAR	83	//10	6//35	1.3535	0.8125	R.NAEYNPK[1643]R.F	Spt15	1	TBP	NAEYNPKR	97	126.128	42017.5	127.131	26196.4	235807	46031.8	28907.3	0.627985	-0.671198	-0.671198
						-1	3.85788	JL121323_121323_ABP_127_30B.41111.41111.4	NP	8.04	0.342251	0.25	//13	17//53	6.61725	2.13636	R.LDLK[1397.75]TVALHAR.N	Spt15	1	TBP	LDLKTVALHAR	83	//10	5//35	1.42275	0.625	R.NAEYNPK[1643]R.F	Spt15	1	TBP	NAEYNPKR	97	126.127	17662.3	127.131	12535	89310.6	19331.2	13832.2	0.715535	-0.482905	-0.482905
						0	2.98087	JL121323_121323_ABP_127_30B.40764.40764.4	NP	8.0035	0.359175	0.264	//13	19//53	6.78175	2.45455	R.LDLK[1397.75]TVALHAR.N	Spt15	1	TBP	LDLKTVALHAR	83	//10	5//35	1.22175	0.625	R.NAEYNPK[1643]R.F	Spt15	1	TBP	NAEYNPKR	97	126.127	19707.5	127.131	13085.1	101702	21580.6	14439.2	0.669083	-0.579744	-0.579744
						0	3.17576	JL121323_121323_ABP_127_30B.42530.42530.4	NP	7.97525	0.321246	0.315	//13	16//53	6.80625	2.09091	R.LDLK[1397.75]TVALHAR.N	Spt15	1	TBP	LDLKTVALHAR	83	//10	5//35	1.169	0.625	R.NAEYNPK[1643]R.F	Spt15	1	TBP	NAEYNPKR	97	126.128	27115.3	127.131	20597.8	108230	29661	22729.3	0.766303	-0.384013	-0.384013
						0	6.58637	JL121323_121323_ABP_127_30B.42052.42052.4	NP	7.936	0.347309	0.202	//13	18//53	6.77025	2.18182	R.LDLK[1397.75]TVALHAR.N	Spt15	1	TBP	LDLKTVALHAR	83	//10	5//35	1.16575	0.625	R.NAEYNPK[1643]R.F	Spt15	1	TBP	NAEYNPKR	97	126.127	22306.4	127.13	14233.8	104294	24433.6	15706.7	0.642833	-0.637483	-0.637483
						0	5.51447	JL121323_121323_ABP_127_30B.41437.41437.4	NP	7.85275	0.345609	0.146	//13	18//53	6.4355	2.18182	R.LDLK[1397.75]TVALHAR.N	Spt15	1	TBP	LDLKTVALHAR	83	//10	5//35	1.41725	0.625	R.NAEYNPK[1643]R.F	Spt15	1	TBP	NAEYNPKR	97	126.127	21776.7	127.131	12593.6	93715.4	23869.2	13896.8	0.582205	-0.7804	-0.7804
						0	2.2013	JL121323_121323_ABP_127_30B.43279.43279.4	NP	7.8305	0.296868	0.588	//13	20//53	6.38225	2.59091	R.LDLK[1397.75]TVALHAR.N	Spt15	1	TBP	LDLKTVALHAR	83	//10	6//35	1.44825	0.8125	R.NAEYNPK[1643]R.F	Spt15	1	TBP	NAEYNPKR	97	126.128	47200.5	127.131	27644.3	211288	51731.7	30505.1	0.589678	-0.762001	-0.762001
						0	1.71407	JL121323_121323_ABP_127_30B.40071.40071.4	NP	7.7865	0.357868	0.136	//13	17//53	6.3565	2.13636	R.LDLK[1397.75]TVALHAR.N	Spt15	1	TBP	LDLKTVALHAR	83	//10	6//35	1.43	0.8125	R.NAEYNPK[1643]R.F	Spt15	1	TBP	NAEYNPKR	97	126.127	19812.6	127.131	13276.6	76252.4	21694.2	14650.5	0.675319	-0.56636	-0.56636
						0	1.03194	JL121323_121323_ABP_127_30B.41903.41903.4	NP	7.7835	0.335611	0.201	//13	20//53	6.539	2.77273	R.LDLK[1397.75]TVALHAR.N	Spt15	1	TBP	LDLKTVALHAR	83	//10	5//35	1.2445	0.625	R.NAEYNPK[1643]R.F	Spt15	1	TBP	NAEYNPKR	97	126.127	20849.9	127.131	13342.2	90603.7	22837.7	14722.9	0.644675	-0.633357	-0.633357
						0	2.10385	JL121323_121323_ABP_127_30B.39915.39915.4	NP	7.71975	0.377734	0.685	//13	16//53	6.292	2.09091	R.LDLK[1397.75]TVALHAR.N	Spt15	1	TBP	LDLKTVALHAR	83	//10	5//35	1.42775	0.625	R.NAEYNPK[1643]R.F	Spt15	1	TBP	NAEYNPKR	97	126.127	19990.3	127.131	13726.9	81520.7	21884.8	15147.4	0.692142	-0.53086	-0.53086
						-3	4.34511	JL121323_121323_ABP_127_30B.09974.09974.4	NP	7.6585	0.205874	0.000117	//13	15//53	6.2555	1.77273	R.LDLK[1397.75]TVALHAR.N	Spt15	1	TBP	LDLKTVALHAR	83	//10	6//35	1.403	1	R.NAEYNPK[1643]R.F	Spt15	1	TBP	NAEYNPKR	97	126.128	21067066	127.131	10820100	76973880	2.31079e+07	1.19398e+07	0.516697	-0.952609	-0.952609
						0	-0.527196	JL121323_121323_ABP_127_30B.45285.45285.4	NP	7.634	0.359213	0.552	//13	19//53	6.24775	2.59091	R.LDLK[1397.75]TVALHAR.N	Spt15	1	TBP	LDLKTVALHAR	83	//10	6//35	1.38625	0.8125	R.NAEYNPK[1643]R.F	Spt15	1	TBP	NAEYNPKR	97	126.127	41369.3	127.131	30785.8	442541	45261	33971.6	0.750571	-0.413939	-0.413939
						0	0.447266	JL121323_121323_ABP_127_50B.11089.11089.4	NP	7.5995	0.275409	0.699	//13	16//53	6.20275	1.86364	R.LDLK[1397.75]TVALHAR.N	Spt15	1	TBP	LDLKTVALHAR	83	//10	6//35	1.39675	0.8125	R.NAEYNPK[1643]R.F	Spt15	1	TBP	NAEYNPKR	97	126.128	847176	127.131	800136	1.15919e+06	924809	882937	0.954723	-0.0668456	-0.0668456
						0	4.15022	JL121323_121323_ABP_127_100B.11599.11599.4	NP	7.53875	0.265917	0.000231	//13	18//53	6.059	2.13636	R.LDLK[1397.75]TVALHAR.N	Spt15	1	TBP	LDLKTVALHAR	83	//10	6//35	1.47975	0.6875	R.NAEYNPK[1643]R.F	Spt15	1	TBP	NAEYNPKR	97	126.127	281656	127.13	185781	1.14027e+06	308441	205006	0.664653	-0.589327	-0.589327
						0	10.2893	JL121323_121323_ABP_127_30B.38882.38882.4	NP	7.22525	0.355521	0.569	//13	18//53	6.02725	2.27273	R.LDLK[1397.75]TVALHAR.N	Spt15	1	TBP	LDLKTVALHAR	83	//10	4//35	1.198	0.5625	R.NAEYNPK[1643]R.F	Spt15	1	TBP	NAEYNPKR	97	126.128	19195.4	127.131	11390.7	86682.5	21036.3	12569.4	0.597511	-0.742964	-0.742964
						0	6.39148	JL121323_121323_ABP_127_30B.40309.40309.4	NP	7.20075	0.324599	0.172	//13	16//53	5.76475	1.95455	R.LDLK[1397.75]TVALHAR.N	Spt15	1	TBP	LDLKTVALHAR	83	//10	6//35	1.436	0.8125	R.NAEYNPK[1643]R.F	Spt15	1	TBP	NAEYNPKR	97	126.127	21325.3	127.131	12165.7	83753.9	23376.4	13424.7	0.574282	-0.800169	-0.800169
						0	0.447266	JL121323_121323_ABP_127_30B.44479.44479.4	NP	7.1635	0.293094	0.166	//13	19//53	5.56075	2.36364	R.LDLK[1397.75]TVALHAR.N	Spt15	1	TBP	LDLKTVALHAR	83	//10	7//35	1.60275	1.0625	R.NAEYNPK[1643]R.F	Spt15	1	TBP	NAEYNPKR	97	126.128	38600.3	127.131	26206.1	134232	42262.1	28918	0.684254	-0.547396	-0.547396
						0	3.07831	JL121323_121323_ABP_127_70B.10412.10412.4	NP	6.952	0.207792	0.03	//13	18//53	6.02675	2.40909	R.LDLK[1397.75]TVALHAR.N	Spt15	1	TBP	LDLKTVALHAR	83	//10	5//35	0.92525	0.625	R.NAEYNPK[1643]R.F	Spt15	1	TBP	NAEYNPKR	97	126.127	1.00771e+06	127.131	576193	4834030	1.10462e+06	635819	0.575598	-0.796867	-0.796867
						0	-1.89144	JL121323_121323_ABP_127_30B.39390.39390.4	P	6.8795	0.34328	0.676	//13	17//53	6.05525	2.13636	R.LDLK[1397.75]TVALHAR.N	Spt15	1	TBP	LDLKTVALHAR	83	//10	5//35	0.82425	0.625	R.NAEYNPK[1643]R.F	Spt15	1	TBP	NAEYNPKR	97	126.127	19119.7	127.131	12840.2	77475.2	20935.2	14169	0.676801	-0.563197	-0.563197
						0	1.87586	JL121323_121323_ABP_127_30B.39048.39048.4	N	6.8285	0.343106		//10	5//35	1.211	0.714286	R.NAEYNPK[1642.99]R.F	Spt15	1	TBP	NAEYNPKR	97	//13	15//53	5.6175	2	R.LDLK[1397.74]TVALHAR.N	Spt15	1	TBP	LDLKTVALHAR	83	126.127	19657.4	127.131	13207.5	75250.9	21523.8	14574.3	0.677123	-0.562511	-0.562511
						0	3.95533	JL121323_121323_ABP_127_30B.44663.44663.4	NP	6.7795	0.273687	0.0576	//13	16//53	5.45975	1.86364	R.LDLK[1397.75]TVALHAR.N	Spt15	1	TBP	LDLKTVALHAR	83	//10	7//35	1.31975	1.0625	R.NAEYNPK[1643]R.F	Spt15	1	TBP	NAEYNPKR	97	126.128	51441.4	127.131	31589	166938	56361.9	34858	0.618467	-0.693231	-0.693231
						0	4.92979	JL121323_121323_ABP_127_30B.37565.37565.4	NP	6.77025	0.305986	0.678	//13	15//53	5.502	1.81818	R.LDLK[1397.75]TVALHAR.N	Spt15	1	TBP	LDLKTVALHAR	83	//10	4//35	1.26825	0.5625	R.NAEYNPK[1643]R.F	Spt15	1	TBP	NAEYNPKR	97	126.127	21390.3	127.131	12993	66011.8	23438.1	14337.5	0.611719	-0.709059	-0.709059
						-1	4.44256	JL121323_121323_ABP_127_30B.37779.37779.4	NP	6.59375	0.305797	0.081	//13	14//53	4.948	1.5	R.LDLK[1397.75]TVALHAR.N	Spt15	1	TBP	LDLKTVALHAR	83	//10	6//35	1.64575	0.8125	R.NAEYNPK[1643]R.F	Spt15	1	TBP	NAEYNPKR	97	126.127	17607.9	127.131	13906.4	68704.6	19254.6	15345.5	0.796979	-0.327386	-0.327386
						0	6.87871	JL121323_121323_ABP_127_30B.41256.41256.4	NP	6.51375	0.274917	0.247	//13	16//53	5.02525	1.81818	R.LDLK[1397.75]TVALHAR.N	Spt15	1	TBP	LDLKTVALHAR	83	//10	5//35	1.4885	0.625	R.NAEYNPK[1643]R.F	Spt15	1	TBP	NAEYNPKR	97	126.127	19287.8	127.131	12039.9	93672.8	21130.4	13285.8	0.628753	-0.669435	-0.669435
						0	3.85788	JL121323_121323_ABP_127_30B.40615.40615.4	NP	6.45425	0.270976	0.758	//13	16//53	5.19475	1.68182	R.LDLK[1397.75]TVALHAR.N	Spt15	1	TBP	LDLKTVALHAR	83	//10	4//35	1.2595	0.5625	R.NAEYNPK[1643]R.F	Spt15	1	TBP	NAEYNPKR	97	126.127	20072.4	127.131	14213.4	92827.3	21969.5	15684.3	0.713912	-0.486181	-0.486181
						0	2.39619	JL121323_121323_ABP_127_30B.41599.41599.4	P	6.44575	0.238824	0.199	//13	15//53	5.81325	1.81818	R.LDLK[1397.75]TVALHAR.N	Spt15	1	TBP	LDLKTVALHAR	83	//10	4//35	0.6325	0.375	R.NAEYNPK[1643]R.F	Spt15	1	TBP	NAEYNPKR	97	126.127	18836.3	127.131	10787.3	77757	20647.5	11903.6	0.576518	-0.794564	-0.794564
						0	-2.67101	JL121323_121323_ABP_127_30B.45488.45488.4	NP	6.1185	0.272667	0.594	1//13	17//53	4.7115	1.90909	R.LDLK[1397.75]TVALHAR.N	Spt15	1	TBP	LDLKTVALHAR	83	//10	6//35	1.407	0.8125	R.NAEYNPK[1643]R.F	Spt15	1	TBP	NAEYNPKR	97	126.128	35672.5	127.131	25553.4	451100	39040.4	28197.7	0.722271	-0.469388	-0.469388
						0	5.41702	JL121323_121323_ABP_127_30B.40933.40933.4	P	5.76775	0.259231	0.439	//13	14//53	5.024	1.63636	R.LDLK[1397.75]TVALHAR.N	Spt15	1	TBP	LDLKTVALHAR	83	//10	4//35	0.74375	0.375	R.NAEYNPK[1643]R.F	Spt15	1	TBP	NAEYNPKR	97	126.127	14462.2	127.131	9481.89	61581.2	15838.2	10463.1	0.660623	-0.5981	-0.5981
						0	2.2013	JL121323_121323_ABP_127_30B.44850.44850.4	NP	5.58825	0.269794	0.58	//13	16//53	4.3015	1.90909	R.LDLK[1397.75]TVALHAR.N	Spt15	1	TBP	LDLKTVALHAR	83	//10	5//35	1.28675	0.625	R.NAEYNPK[1643]R.F	Spt15	1	TBP	NAEYNPKR	97	126.128	25168	127.131	19386.1	243500	27527.6	21392.2	0.777118	-0.363795	-0.363795
						0	3.17576	JL121323_121323_ABP_127_30B.42717.42717.4	P	5.5805	0.234273	0.495	//13	15//53	5.3425	1.81818	R.LDLK[1397.75]TVALHAR.N	Spt15	1	TBP	LDLKTVALHAR	83	//10	3//35	0.238	0.1875	R.NAEYNPK[1643]R.F	Spt15	1	TBP	NAEYNPKR	97	126.127	25123.4	127.131	19001.1	84998.3	27483.1	20967.4	0.762922	-0.390393	-0.390393
						0	4.54	JL121323_121323_ABP_127_30B.39759.39759.4	P	5.5695	0.272055	0.602	//13	16//53	4.9055	1.59091	R.LDLK[1397.75]TVALHAR.N	Spt15	1	TBP	LDLKTVALHAR	83	//10	3//35	0.664	0.3125	R.NAEYNPK[1643]R.F	Spt15	1	TBP	NAEYNPKR	97	126.127	15398.8	127.131	11155	63284.1	16851.1	12309.4	0.73048	-0.453084	-0.453084
						3	45.1751	JL121323_121323_ABP_127_30B.40194.40194.4	P	5.50725	0.250148	0.12	1//13	15//53	4.15025	1.54545	R.LDLK[1397.75]TVALHAR.N	Spt15	1	TBP	LDLKTVALHAR	83	//10	5//35	1.357	0.625	R.NAEYNPK[1643]R.F	Spt15	1	TBP	NAEYNPKR	97	126.127	19176.7	127.131	9851.82	75946.1	21034.4	10871.3	0.516836	-0.952222	-0.952222
						-1	3.56554	JL121323_121323_ABP_127_30B.38861.38861.4	P	5.49325	0.251	0.0789	//13	15//53	5.02475	1.54545	R.LDLK[1397.75]TVALHAR.N	Spt15	1	TBP	LDLKTVALHAR	83	//10	4//35	0.4685	0.375	R.NAEYNPK[1643]R.F	Spt15	1	TBP	NAEYNPKR	97	126.127	18760.3	127.131	10459.6	79007.4	20567.7	11542	0.561172	-0.833486	-0.833486
						-1	4.92979	JL121323_121323_ABP_127_30B.39300.39300.4	P	5.48125	0.238704	0.3	//13	16//53	4.90775	1.81818	R.LDLK[1397.75]TVALHAR.N	Spt15	1	TBP	LDLKTVALHAR	83	//10	6//35	0.5735	0.8125	R.NAEYNPK[1643]R.F	Spt15	1	TBP	NAEYNPKR	97	126.128	28152.1	127.131	16701.9	126807	30852	18430.3	0.597376	-0.743288	-0.743288
						0	6.50448	JL121323_121323_ABP_127_30B.39601.39601.4	N	5.3905	0.215758		//10	4//35	1.07275	0.642857	R.NAEYNPK[1643.01]R.F	Spt15	1	TBP	NAEYNPKR	97	//13	14//53	4.31775	1.9	R.LDLK[1397.77]TVALHAR.N	Spt15	1	TBP	LDLKTVALHAR	83	126.128	13354.7	127.131	9074.52	40586.3	14621.5	10013.6	0.684854	-0.546131	-0.546131
						0	-0.137411	JL121323_121323_ABP_127_30B.37973.37973.4	P	5.38675	0.217673	0.07	//13	15//53	4.7925	1.54545	R.LDLK[1397.75]TVALHAR.N	Spt15	1	TBP	LDLKTVALHAR	83	//10	4//35	0.59425	0.375	R.NAEYNPK[1643]R.F	Spt15	1	TBP	NAEYNPKR	97	126.127	17900.5	127.131	12043.7	66211.6	19600	13290.1	0.678065	-0.560504	-0.560504
						0	2.59796	JL121323_121323_ABP_127_70B.10348.10348.5	NP	5.058	0.202494	0.325	//13	13//65	3.968	1.40909	R.LDLK[1397.75]TVALHAR.N	Spt15	1	TBP	LDLKTVALHAR	83	//10	8//43	1.09	1.5	R.NAEYNPK[1643]R.F	Spt15	1	TBP	NAEYNPKR	97	126.128	192841	127.131	99287.4	1.11978e+06	211520	109562	0.517975	-0.949044	-0.949044
						0	1.6844	JL121323_121323_ABP_127_30B.09945.09945.5	NP	5.03625	0.220164	0.134	//13	13//65	3.94125	1.54545	R.LDLK[1397.75]TVALHAR.N	Spt15	1	TBP	LDLKTVALHAR	83	//10	9//43	1.095	1.5625	R.NAEYNPK[1643]R.F	Spt15	1	TBP	NAEYNPKR	97	126.128	16319911	127.131	8027540	112950632	1.79052e+07	8.85826e+06	0.494731	-1.01528	-1.01528
						0	4.30327	JL121323_121323_ABP_127_100B.11606.11606.5	NP	4.89525	0.186884	0.248	//13	13//65	3.77675	1.31818	R.LDLK[1397.75]TVALHAR.N	Spt15	1	TBP	LDLKTVALHAR	83	//10	8//43	1.1185	1.5	R.NAEYNPK[1643]R.F	Spt15	1	TBP	NAEYNPKR	97	126.128	131461	127.131	63817.5	918670	144241	70421.5	0.488221	-1.03439	-1.03439
						0	4.80607	JL121323_121323_ABP_127_1ug.10683.10683.5	N	4.87075	0.195667		//10	8//43	0.9665	1.71429	R.NAEYNPK[1643.01]R.F	Spt15	1	TBP	NAEYNPKR	97	//13	14//65	3.90425	1.6	R.LDLK[1397.76]TVALHAR.N	Spt15	1	TBP	LDLKTVALHAR	83	126.128	241431	127.131	123988	1.28166e+06	264820	136819	0.516647	-0.95275	-0.95275
						0	2.29344	JL121323_121323_ABP_127_30B.09677.09677.5	NP	4.869	0.198382	0.158	//13	13//65	3.7685	1.31818	R.LDLK[1397.75]TVALHAR.N	Spt15	1	TBP	LDLKTVALHAR	83	//10	8//43	1.1005	1.5	R.NAEYNPK[1643]R.F	Spt15	1	TBP	NAEYNPKR	97	126.128	396151	127.131	231066	1.52705e+06	434192	254978	0.587247	-0.76796	-0.76796
						0	2.43083	JL121323_121323_ABP_127_50B.11111.11111.5	N	4.85975	0.193724		//10	8//43	1.015	1.71429	R.NAEYNPK[1643]R.F	Spt15	1	TBP	NAEYNPKR	97	//13	14//65	3.84475	1.6	R.LDLK[1397.76]TVALHAR.N	Spt15	1	TBP	LDLKTVALHAR	83	126.128	919092	127.131	458172	5.27269e+06	1.0083e+06	505585	0.501424	-0.995897	-0.995897
						0	1.39547	JL121323_121323_ABP_127_D.12271.12271.5	N	4.8475	0.202998		//10	8//43	1.053	1.71429	R.NAEYNPK[1643]R.F	Spt15	1	TBP	NAEYNPKR	97	//13	13//65	3.7945	1.45	R.LDLK[1397.75]TVALHAR.N	Spt15	1	TBP	LDLKTVALHAR	83	126.128	125012	127.131	62945.9	836489	137138	69459.7	0.506496	-0.981377	-0.981377
						0	2.68853	JL121323_121323_ABP_127_30B.42946.42946.4	NP	4.84725	0.202627	0.484	//13	16//53	3.6325	1.54545	R.LDLK[1397.75]TVALHAR.N	Spt15	1	TBP	LDLKTVALHAR	83	//10	5//35	1.21475	0.625	R.NAEYNPK[1643]R.F	Spt15	1	TBP	NAEYNPKR	97	126.128	32121.7	127.131	24084.1	205565	35141.3	26576.4	0.756272	-0.403023	-0.403023
						0	3.56554	JL121323_121323_ABP_127_30B.39230.39230.4	P	4.81475	0.222293	0.406	//13	14//53	4.3425	1.59091	R.LDLK[1397.75]TVALHAR.N	Spt15	1	TBP	LDLKTVALHAR	83	//10	4//35	0.47225	0.375	R.NAEYNPK[1643]R.F	Spt15	1	TBP	NAEYNPKR	97	126.127	16979.3	127.131	12351.4	62613.8	18580	13629.5	0.733558	-0.447018	-0.447018
						0	1.76089	JL121323_121323_ABP_127_1ug.10912.10912.5	N	4.68575	0.200752		//10	8//43	1.0075	1.71429	R.NAEYNPK[1643]R.F	Spt15	1	TBP	NAEYNPKR	97	//13	13//65	3.67825	1.45	R.LDLK[1397.75]TVALHAR.N	Spt15	1	TBP	LDLKTVALHAR	83	126.128	3.56313e+06	127.131	1.72592e+06	24855090	3.90958e+06	1.90453e+06	0.487144	-1.03758	-1.03758
						0	2.23254	JL121323_121323_ABP_127_50B.11444.11444.5	P	4.62275	0.226772	0.735	//13	12//65	3.8225	1.40909	R.LDLK[1397.75]TVALHAR.N	Spt15	1	TBP	LDLKTVALHAR	83	//10	8//43	0.80025	1.125	R.NAEYNPK[1643]R.F	Spt15	1	TBP	NAEYNPKR	97	126.128	286804	127.131	194718	1.49067e+06	314011	214869	0.68427	-0.547363	-0.547363
						0	1.6844	JL121323_121323_ABP_127_30B.43420.43420.5	P	4.608	0.203412	0.681	//13	14//65	3.711	1.5	R.LDLK[1397.75]TVALHAR.N	Spt15	1	TBP	LDLKTVALHAR	83	//10	8//43	0.897	1.1875	R.NAEYNPK[1643]R.F	Spt15	1	TBP	NAEYNPKR	97	126.128	32135.9	127.131	15597.8	214470	35260.1	17212	0.488142	-1.03463	-1.03463
						-1	-4.56433	JL121323_121323_ABP_127_30B.10755.10755.5	P	4.606	0.1828	0.69	//13	12//65	3.71325	1.27273	R.LDLK[1397.75]TVALHAR.N	Spt15	1	TBP	LDLKTVALHAR	83	1//10	7//43	0.89275	1.3125	R.NAEYNPK[1643]R.F	Spt15	1	TBP	NAEYNPKR	97	126.128	950451	127.131	502718	5594374	1.04235e+06	554741	0.532202	-0.909953	-0.909953
						0	1.86711	JL121323_121323_ABP_127_30B.10228.10228.5	P	4.59425	0.187766	0.147	//13	13//65	3.69725	1.31818	R.LDLK[1397.75]TVALHAR.N	Spt15	1	TBP	LDLKTVALHAR	83	//10	8//43	0.897	1.5	R.NAEYNPK[1643]R.F	Spt15	1	TBP	NAEYNPKR	97	126.128	894731	127.131	485520	5296369	981092	535764	0.546089	-0.872792	-0.872792
						0	-1.11187	JL121323_121323_ABP_127_30B.40231.40231.4	P	4.5865	0.19647	0.709	//13	14//53	4.13575	1.22727	R.LDLK[1397.75]TVALHAR.N	Spt15	1	TBP	LDLKTVALHAR	83	//10	3//35	0.45075	0.3125	R.NAEYNPK[1643]R.F	Spt15	1	TBP	NAEYNPKR	97	126.127	18358.2	127.13	11889.8	65436	20106.7	13120.2	0.652528	-0.615888	-0.615888
						-1	6.17164	JL121323_121323_ABP_127_1ug.11624.11624.5	N	4.5385	0.188935		1//10	7//43	0.98575	1.5	R.NAEYNPK[1642.98]R.F	Spt15	1	TBP	NAEYNPKR	97	//13	11//65	3.55275	1.35	R.LDLK[1397.73]TVALHAR.N	Spt15	1	TBP	LDLKTVALHAR	83	126.128	108242	127.131	66797.9	559401	118592	73710.3	0.621545	-0.686068	-0.686068
						0	3.57242	JL121323_121323_ABP_127_30B.46696.46696.5	P	4.4995	0.20232	0.677	//13	15//65	3.88625	1.63636	R.LDLK[1397.75]TVALHAR.N	Spt15	1	TBP	LDLKTVALHAR	83	//10	6//43	0.61325	0.6875	R.NAEYNPK[1643]R.F	Spt15	1	TBP	NAEYNPKR	97	126.127	21394.6	127.131	11596.5	139401	23459.8	12796.5	0.545465	-0.87444	-0.87444
						0	1.6844	JL121323_121323_ABP_127_30B.44361.44361.5	P	4.45375	0.207484	0.173	//13	14//65	3.776	1.59091	R.LDLK[1397.75]TVALHAR.N	Spt15	1	TBP	LDLKTVALHAR	83	//10	7//43	0.67775	0.875	R.NAEYNPK[1643]R.F	Spt15	1	TBP	NAEYNPKR	97	126.128	34417.2	127.131	20396.5	240299	37718.3	22507.2	0.596718	-0.74488	-0.74488
						0	-1.30677	JL121323_121323_ABP_127_30B.38711.38711.4	P	4.45325	0.207514	0.513	//13	16//53	4.033	1.86364	R.LDLK[1397.75]TVALHAR.N	Spt15	1	TBP	LDLKTVALHAR	83	//10	3//35	0.42025	0.3125	R.NAEYNPK[1643]R.F	Spt15	1	TBP	NAEYNPKR	97	126.127	16168	127.13	10613.2	61587.9	17706.2	11711.4	0.661431	-0.596337	-0.596337
						0	2.04983	JL121323_121323_ABP_127_30B.44115.44115.5	P	4.44425	0.202421	0.23	//13	12//65	3.69125	1.31818	R.LDLK[1397.75]TVALHAR.N	Spt15	1	TBP	LDLKTVALHAR	83	//10	7//43	0.753	0.875	R.NAEYNPK[1643]R.F	Spt15	1	TBP	NAEYNPKR	97	126.127	34863.9	127.131	20196.4	250938	38213.5	22286.4	0.583208	-0.777918	-0.777918
						-1	-4.92976	JL121323_121323_ABP_127_30B.10691.10691.5	P	4.4385	0.188172	0.713	//13	13//65	3.66625	1.31818	R.LDLK[1397.75]TVALHAR.N	Spt15	1	TBP	LDLKTVALHAR	83	1//10	7//43	0.77225	1.125	R.NAEYNPK[1643]R.F	Spt15	1	TBP	NAEYNPKR	97	126.128	483566	127.131	276073	2729736	530075	304642	0.574716	-0.79908	-0.79908
						0	2.04983	JL121323_121323_ABP_127_30B.44101.44101.5	P	4.43775	0.192703	0.606	//13	14//65	3.815	1.59091	R.LDLK[1397.75]TVALHAR.N	Spt15	1	TBP	LDLKTVALHAR	83	//10	6//43	0.62275	0.6875	R.NAEYNPK[1643]R.F	Spt15	1	TBP	NAEYNPKR	97	126.127	32353.1	127.131	18507.5	230381	35464.3	20422.7	0.575866	-0.796195	-0.796195
						0	1.86711	JL121323_121323_ABP_127_30B.41779.41779.5	P	4.4235	0.227646	0.746	//13	12//65	3.803	1.40909	R.LDLK[1397.75]TVALHAR.N	Spt15	1	TBP	LDLKTVALHAR	83	//10	6//43	0.6205	0.6875	R.NAEYNPK[1643]R.F	Spt15	1	TBP	NAEYNPKR	97	126.127	14700.1	127.131	8597.42	107471	16111.4	9487.11	0.588844	-0.764042	-0.764042
						-1	0.612495	JL121323_121323_ABP_127_30B.46317.46317.5	P	4.40325	0.203651	0.724	//13	11//65	3.82	1.36364	R.LDLK[1397.75]TVALHAR.N	Spt15	1	TBP	LDLKTVALHAR	83	//10	5//43	0.58325	0.625	R.NAEYNPK[1643]R.F	Spt15	1	TBP	NAEYNPKR	97	126.127	27330.5	127.131	14419.9	195636	29973.5	15912.1	0.530871	-0.913566	-0.913566
						0	3.2679	JL121323_121323_ABP_127_30B.44451.44451.5	P	4.37825	0.215153	0.273	//13	13//65	3.56375	1.45455	R.LDLK[1397.75]TVALHAR.N	Spt15	1	TBP	LDLKTVALHAR	83	//10	8//43	0.8145	1.3125	R.NAEYNPK[1643]R.F	Spt15	1	TBP	NAEYNPKR	97	126.128	32280.8	127.131	16386.1	231387	35410.3	18081.8	0.510636	-0.969633	-0.969633
						0	3.45061	JL121323_121323_ABP_127_30B.45977.45977.5	P	4.33525	0.204923	0.651	//13	13//65	3.64325	1.45455	R.LDLK[1397.75]TVALHAR.N	Spt15	1	TBP	LDLKTVALHAR	83	//10	7//43	0.692	0.875	R.NAEYNPK[1643]R.F	Spt15	1	TBP	NAEYNPKR	97	126.128	27004.4	127.131	14156.8	184172	29617	15621.8	0.52746	-0.922868	-0.922868
						0	1.31898	JL121323_121323_ABP_127_30B.44283.44283.5	P	4.32675	0.217294	0.286	//13	13//65	3.65475	1.45455	R.LDLK[1397.75]TVALHAR.N	Spt15	1	TBP	LDLKTVALHAR	83	//10	7//43	0.672	0.875	R.NAEYNPK[1643]R.F	Spt15	1	TBP	NAEYNPKR	97	126.128	31670.3	127.131	18261.9	240872	34714.1	20151.7	0.580503	-0.784625	-0.784625
						0	3.207	JL121323_121323_ABP_127_30B.39007.39007.5	P	4.325	0.213385	0.483	//13	13//65	3.76425	1.45455	R.LDLK[1397.75]TVALHAR.N	Spt15	1	TBP	LDLKTVALHAR	83	//10	6//43	0.56075	0.6875	R.NAEYNPK[1643]R.F	Spt15	1	TBP	NAEYNPKR	97	126.127	13827.7	127.131	7214.15	85076.7	15165.9	7960.69	0.524909	-0.929861	-0.929861
						0	1.6844	JL121323_121323_ABP_127_30B.43617.43617.5	P	4.32025	0.186741	0.633	//13	12//65	3.69225	1.31818	R.LDLK[1397.75]TVALHAR.N	Spt15	1	TBP	LDLKTVALHAR	83	//10	6//43	0.628	0.8125	R.NAEYNPK[1643]R.F	Spt15	1	TBP	NAEYNPKR	97	126.127	33234.7	127.131	17857	238034	36444.7	19704.9	0.540678	-0.887159	-0.887159
						0	4.97321	JL121323_121323_ABP_127_30B.42918.42918.5	P	4.319	0.194493	0.773	//13	12//65	3.7165	1.40909	R.LDLK[1397.75]TVALHAR.N	Spt15	1	TBP	LDLKTVALHAR	83	//10	6//43	0.6025	0.8125	R.NAEYNPK[1643]R.F	Spt15	1	TBP	NAEYNPKR	97	126.127	17614.2	127.131	9638.92	116124	19313.4	10636.4	0.550727	-0.86059	-0.86059
						0	4.24236	JL121323_121323_ABP_127_30B.40009.40009.5	P	4.295	0.222591	0.6	//13	13//65	3.7355	1.45455	R.LDLK[1397.75]TVALHAR.N	Spt15	1	TBP	LDLKTVALHAR	83	//10	4//43	0.5595	0.5625	R.NAEYNPK[1643]R.F	Spt15	1	TBP	NAEYNPKR	97	126.127	12789.7	127.131	7768.39	84287.2	14014.1	8572.3	0.611689	-0.709129	-0.709129
						0	2.78067	JL121323_121323_ABP_127_30B.45802.45802.5	P	4.26125	0.206977	0.785	//13	12//65	3.56125	1.31818	R.LDLK[1397.75]TVALHAR.N	Spt15	1	TBP	LDLKTVALHAR	83	//10	6//43	0.7	0.875	R.NAEYNPK[1643]R.F	Spt15	1	TBP	NAEYNPKR	97	126.127	27241.7	127.131	14119.8	185270	29879.2	15581	0.521466	-0.939355	-0.939355
						-1	5.54571	JL121323_121323_ABP_127_30B.43254.43254.5	P	4.252	0.18174	0.619	//13	11//65	3.53675	1.27273	R.LDLK[1397.75]TVALHAR.N	Spt15	1	TBP	LDLKTVALHAR	83	//10	7//43	0.71525	0.875	R.NAEYNPK[1643]R.F	Spt15	1	TBP	NAEYNPKR	97	126.127	26492.2	127.131	14686.7	196039	29045.5	16206.5	0.557969	-0.841742	-0.841742
						0	2.96338	JL121323_121323_ABP_127_30B.43926.43926.5	P	4.2495	0.190011	0.711	//13	12//65	3.6805	1.40909	R.LDLK[1397.75]TVALHAR.N	Spt15	1	TBP	LDLKTVALHAR	83	//10	6//43	0.569	0.6875	R.NAEYNPK[1643]R.F	Spt15	1	TBP	NAEYNPKR	97	126.127	33531.2	127.131	18843.3	233233	36759.9	20793.2	0.56565	-0.822017	-0.822017
						0	2.71977	JL121323_121323_ABP_127_30B.40537.40537.5	P	4.248	0.201571	0.591	//13	11//65	3.675	1.27273	R.LDLK[1397.75]TVALHAR.N	Spt15	1	TBP	LDLKTVALHAR	83	//10	6//43	0.573	0.6875	R.NAEYNPK[1643]R.F	Spt15	1	TBP	NAEYNPKR	97	126.127	13156	127.13	7420.63	90530.7	14422.5	8188.54	0.567763	-0.81664	-0.81664
						-1	2.50051	JL121323_121323_ABP_127_30B.41982.41982.5	P	4.23875	0.208287	0.596	//13	13//65	3.6425	1.45455	R.LDLK[1397.75]TVALHAR.N	Spt15	1	TBP	LDLKTVALHAR	83	//10	5//43	0.59625	0.625	R.NAEYNPK[1643]R.F	Spt15	1	TBP	NAEYNPKR	97	126.127	15291	127.131	7834.58	114367	16772.6	8645.33	0.515444	-0.956114	-0.956114
						0	0.953556	JL121323_121323_ABP_127_30B.46866.46866.5	P	4.2175	0.202916	0.655	//13	12//65	3.61525	1.40909	R.LDLK[1397.75]TVALHAR.N	Spt15	1	TBP	LDLKTVALHAR	83	//10	6//43	0.60225	0.6875	R.NAEYNPK[1643]R.F	Spt15	1	TBP	NAEYNPKR	97	126.127	21925.5	127.131	11008	152628	24052.6	12147.1	0.505024	-0.985575	-0.985575
						0	1.80621	JL121323_121323_ABP_127_70B.10590.10590.5	P	4.21425	0.192186	0.457	//13	12//65	3.5735	1.27273	R.LDLK[1397.75]TVALHAR.N	Spt15	1	TBP	LDLKTVALHAR	83	//10	6//43	0.64075	0.8125	R.NAEYNPK[1643]R.F	Spt15	1	TBP	NAEYNPKR	97	126.128	172232	127.131	107856	1.02232e+06	188681	119018	0.630787	-0.664776	-0.664776
						0	1.6844	JL121323_121323_ABP_127_30B.46339.46339.5	P	4.21025	0.197248	0.704	//13	12//65	3.65125	1.31818	R.LDLK[1397.75]TVALHAR.N	Spt15	1	TBP	LDLKTVALHAR	83	//10	6//43	0.559	0.6875	R.NAEYNPK[1643]R.F	Spt15	1	TBP	NAEYNPKR	97	126.127	22486.5	127.131	10687.7	158789	24675.4	11793.7	0.477953	-1.06506	-1.06506
						0	4.60779	JL121323_121323_ABP_127_30B.43587.43587.5	P	4.20925	0.19191	0.194	//13	11//65	3.55825	1.27273	R.LDLK[1397.75]TVALHAR.N	Spt15	1	TBP	LDLKTVALHAR	83	//10	7//43	0.651	0.875	R.NAEYNPK[1643]R.F	Spt15	1	TBP	NAEYNPKR	97	126.127	35051	127.131	17721.1	238849	38450	19555	0.508582	-0.975448	-0.975448
						0	2.78067	JL121323_121323_ABP_127_30B.42307.42307.5	P	4.19725	0.210859	0.676	//13	12//65	3.7165	1.40909	R.LDLK[1397.75]TVALHAR.N	Spt15	1	TBP	LDLKTVALHAR	83	//10	5//43	0.48075	0.625	R.NAEYNPK[1643]R.F	Spt15	1	TBP	NAEYNPKR	97	126.127	11779.6	127.131	8661.7	73855.8	12889	9558.05	0.741565	-0.431355	-0.431355
						0	3.02429	JL121323_121323_ABP_127_30B.46153.46153.5	P	4.185	0.193195	0.195	//13	11//65	3.52375	1.27273	R.LDLK[1397.75]TVALHAR.N	Spt15	1	TBP	LDLKTVALHAR	83	//10	7//43	0.66125	0.875	R.NAEYNPK[1643]R.F	Spt15	1	TBP	NAEYNPKR	97	126.127	24818	127.131	13409.3	179090	27214.2	14796.9	0.543722	-0.879059	-0.879059
						0	1.01446	JL121323_121323_ABP_127_30B.10432.10432.5	P	4.1575	0.169673	0.142	//13	11//65	3.39825	1.22727	R.LDLK[1397.75]TVALHAR.N	Spt15	1	TBP	LDLKTVALHAR	83	//10	7//43	0.75925	1.0625	R.NAEYNPK[1643]R.F	Spt15	1	TBP	NAEYNPKR	97	126.128	217795	127.131	140481	895247	238546	155019	0.649849	-0.621824	-0.621824
						0	2.35434	JL121323_121323_ABP_127_30B.42469.42469.5	P	4.135	0.195907	0.657	//13	11//65	3.44225	1.36364	R.LDLK[1397.75]TVALHAR.N	Spt15	1	TBP	LDLKTVALHAR	83	//10	7//43	0.69275	0.875	R.NAEYNPK[1643]R.F	Spt15	1	TBP	NAEYNPKR	97	126.127	14546.4	127.131	8932.25	106952	15937.8	9856.59	0.618441	-0.693292	-0.693292
						0	2.17163	JL121323_121323_ABP_127_30B.46755.46755.5	P	4.13175	0.182805	0.757	//13	13//65	3.6145	1.45455	R.LDLK[1397.75]TVALHAR.N	Spt15	1	TBP	LDLKTVALHAR	83	//10	4//43	0.51725	0.5625	R.NAEYNPK[1643]R.F	Spt15	1	TBP	NAEYNPKR	97	126.127	17622.4	127.131	9461.87	128523	19324.6	10441	0.540298	-0.888174	-0.888174
						0	2.29344	JL121323_121323_ABP_127_30B.39526.39526.5	P	4.129	0.211326	0.711	//13	9//65	3.657	1.18182	R.LDLK[1397.75]TVALHAR.N	Spt15	1	TBP	LDLKTVALHAR	83	//10	5//43	0.472	0.625	R.NAEYNPK[1643]R.F	Spt15	1	TBP	NAEYNPKR	97	126.127	10631.3	127.131	6092.4	63775.5	11653.5	6722.86	0.576897	-0.793614	-0.793614
						-2	75.0005	JL121323_121323_ABP_127_30B.38789.38789.5	P	4.115	0.192803	0.674	//13	11//65	3.60375	1.36364	R.LDLK[1397.75]TVALHAR.N	Spt15	1	TBP	LDLKTVALHAR	83	//10	5//43	0.51125	0.625	R.NAEYNPK[1643]R.F	Spt15	1	TBP	NAEYNPKR	97	126.128	14816.6	127.131	7392.32	107209	16254.6	8157.3	0.501847	-0.994681	-0.994681
						0	1.6235	JL121323_121323_ABP_127_30B.43760.43760.5	P	4.095	0.193961	0.188	//13	11//65	3.536	1.27273	R.LDLK[1397.75]TVALHAR.N	Spt15	1	TBP	LDLKTVALHAR	83	//10	5//43	0.559	0.625	R.NAEYNPK[1643]R.F	Spt15	1	TBP	NAEYNPKR	97	126.127	37618.3	127.13	20945.7	269146	41242.8	23113.3	0.560419	-0.835421	-0.835421
						0	1.98892	JL121323_121323_ABP_127_30B.43086.43086.5	P	4.0925	0.193325	0.755	//13	12//65	3.496	1.31818	R.LDLK[1397.75]TVALHAR.N	Spt15	1	TBP	LDLKTVALHAR	83	//10	6//43	0.5965	0.6875	R.NAEYNPK[1643]R.F	Spt15	1	TBP	NAEYNPKR	97	126.127	27223.1	127.131	13191.9	183338	29870	14557.1	0.487348	-1.03698	-1.03698
						0	-1.11717	JL121323_121323_ABP_127_30B.45270.45270.5	P	4.0915	0.193965	0.15	//13	12//65	3.6205	1.40909	R.LDLK[1397.75]TVALHAR.N	Spt15	1	TBP	LDLKTVALHAR	83	//10	4//43	0.471	0.5625	R.NAEYNPK[1643]R.F	Spt15	1	TBP	NAEYNPKR	97	126.127	29505.2	127.131	16483.3	168486	32347.4	18189.1	0.562304	-0.830578	-0.830578
						0	1.92802	JL121323_121323_ABP_127_30B.45626.45626.5	P	4.05525	0.198475	0.16	//13	12//65	3.58075	1.40909	R.LDLK[1397.75]TVALHAR.N	Spt15	1	TBP	LDLKTVALHAR	83	//10	5//43	0.4745	0.625	R.NAEYNPK[1643]R.F	Spt15	1	TBP	NAEYNPKR	97	126.128	27489.1	127.131	15467.1	172955	30135.7	17067.7	0.566361	-0.820206	-0.820206
						0	-0.995367	JL121323_121323_ABP_127_30B.45443.45443.5	P	4.049	0.185123	0.254	//13	13//65	3.38025	1.45455	R.LDLK[1397.75]TVALHAR.N	Spt15	1	TBP	LDLKTVALHAR	83	//10	7//43	0.66875	1.125	R.NAEYNPK[1643]R.F	Spt15	1	TBP	NAEYNPKR	97	126.127	24104.1	127.131	12392.8	171905	26439	13675.3	0.517239	-0.951097	-0.951097
						0	2.35434	JL121323_121323_ABP_127_30B.44792.44792.5	P	3.90325	0.179641	0.793	//13	11//65	3.41575	1.27273	R.LDLK[1397.75]TVALHAR.N	Spt15	1	TBP	LDLKTVALHAR	83	//10	5//43	0.4875	0.625	R.NAEYNPK[1643]R.F	Spt15	1	TBP	NAEYNPKR	97	126.127	14420.8	127.131	7027.47	107405	15822.4	7754.7	0.490109	-1.02883	-1.02883
						0	-2.33525	JL121323_121323_ABP_127_30B.44625.44625.5	P	3.894	0.185924	0.619	//13	13//65	3.2085	1.45455	R.LDLK[1397.75]TVALHAR.N	Spt15	1	TBP	LDLKTVALHAR	83	//10	7//43	0.6855	1.125	R.NAEYNPK[1643]R.F	Spt15	1	TBP	NAEYNPKR	97	126.127	35375.4	127.131	16807.1	226936	38818.9	18546.4	0.477767	-1.06562	-1.06562
						-1	3.53588	JL121323_121323_ABP_127_30B.47187.47187.5	P	3.83425	0.172272	0.678	//13	11//65	3.165	1.36364	R.LDLK[1397.75]TVALHAR.N	Spt15	1	TBP	LDLKTVALHAR	83	//10	6//43	0.66925	0.8125	R.NAEYNPK[1643]R.F	Spt15	1	TBP	NAEYNPKR	97	126.127	15845	127.131	8701.17	119719	17373.2	9601.6	0.552668	-0.855514	-0.855514
						0	0.607193	JL121323_121323_ABP_127_100B.11718.11718.6	P	3.81225	0.192135	4.63e-06	//13	10//65	3.60675	1.22727	R.LDLK[1397.75]TVALHAR.N	Spt15	1	TBP	LDLKTVALHAR	83	//10	4//43	0.2055	0.375	R.NAEYNPK[1643]R.F	Spt15	1	TBP	NAEYNPKR	97	126.128	59738.3	127.131	28902.6	247092	65547	31893.5	0.486575	-1.03927	-1.03927
						0	6.13038	JL121323_121323_ABP_127_30B.47526.47526.5	P	3.81125	0.166776	0.74	//13	11//65	3.20925	1.27273	R.LDLK[1397.75]TVALHAR.N	Spt15	1	TBP	LDLKTVALHAR	83	//10	6//43	0.602	0.6875	R.NAEYNPK[1643]R.F	Spt15	1	TBP	NAEYNPKR	97	126.127	15221.6	127.131	8578.01	110716	16687	9465.69	0.56725	-0.817944	-0.817944
						0	3.69423	JL121323_121323_ABP_127_30B.38971.38971.5	P	3.747	0.185257	0.526	//13	11//65	3.17575	1.27273	R.LDLK[1397.75]TVALHAR.N	Spt15	1	TBP	LDLKTVALHAR	83	//10	6//43	0.57125	0.6875	R.NAEYNPK[1643]R.F	Spt15	1	TBP	NAEYNPKR	97	126.127	11950.2	127.13	7278.1	93356.2	13094	8031.26	0.613353	-0.705211	-0.705211
						-1	7.0074	JL121323_121323_ABP_127_30B.42715.42715.5	P	3.698	0.177699	0.757	//13	12//65	3.1465	1.40909	R.LDLK[1397.75]TVALHAR.N	Spt15	1	TBP	LDLKTVALHAR	83	//10	4//43	0.5515	0.5625	R.NAEYNPK[1643]R.F	Spt15	1	TBP	NAEYNPKR	97	126.127	19445.1	127.131	10179.8	140896	21326.5	11233.3	0.526729	-0.924868	-0.924868
						0	1.41112	JL121323_121323_ABP_127_50B.11126.11126.6	P	3.6775	0.132951	0.241	//13	10//65	3.385	1.18182	R.LDLK[1397.75]TVALHAR.N	Spt15	1	TBP	LDLKTVALHAR	83	1//10	5//43	0.2925	0.625	R.NAEYNPK[1643]R.F	Spt15	1	TBP	NAEYNPKR	97	126.128	618081	127.131	283226	1.84586e+06	678373	312535	0.460713	-1.11806	-1.11806
						0	0.680277	JL121323_121323_ABP_127_30B.09983.09983.6	P	3.6715	0.124224	0.0435	//13	10//65	3.34825	1.18182	R.LDLK[1397.75]TVALHAR.N	Spt15	1	TBP	LDLKTVALHAR	83	1//10	5//43	0.32325	0.625	R.NAEYNPK[1643]R.F	Spt15	1	TBP	NAEYNPKR	97	126.128	5790498	127.131	2.62826e+06	21788646	6.35565e+06	2.90024e+06	0.456325	-1.13187	-1.13187
						0	0.461023	JL121323_121323_ABP_127_70B.10454.10454.6	P	3.64	0.128036	2.65e-06	//13	10//65	3.3035	1.18182	R.LDLK[1397.75]TVALHAR.N	Spt15	1	TBP	LDLKTVALHAR	83	1//10	5//43	0.3365	0.625	R.NAEYNPK[1643]R.F	Spt15	1	TBP	NAEYNPKR	97	126.128	296848	127.131	137367	985862	325788	151583	0.465279	-1.10383	-1.10383
						0	-0.995367	JL121323_121323_ABP_127_30B.45446.45446.5	P	3.5825	0.181099	0.685	//13	11//65	3.15475	1.27273	R.LDLK[1397.75]TVALHAR.N	Spt15	1	TBP	LDLKTVALHAR	83	//10	5//43	0.42775	0.625	R.NAEYNPK[1643]R.F	Spt15	1	TBP	NAEYNPKR	97	126.127	22160.2	127.131	10741.3	171734	24314.7	11852.9	0.487477	-1.03659	-1.03659
						0	1.92272	JL121323_121323_ABP_127_30B.09721.09721.6	P	3.5735	0.116919	0.0199	//13	11//65	3.37975	1.22727	R.LDLK[1397.75]TVALHAR.N	Spt15	1	TBP	LDLKTVALHAR	83	//10	4//43	0.19375	0.5625	R.NAEYNPK[1643]R.F	Spt15	1	TBP	NAEYNPKR	97	126.128	1.81489e+06	127.131	870637	5.26488e+06	1.99145e+06	960734	0.482429	-1.05161	-1.05161
						1253	122.796	JL121323_121323_ABP_127_50B.11117.11117.3	P	3.5295	0.137766	0.0241	//13	7//41	3.26925	0.954545	R.LDLK[1397.75]TVALHAR.N	Spt15	1	TBP	LDLKTVALHAR	83	1//10	3//27	0.26025	0.3125	R.NAEYNPK[1643]R.F	Spt15	1	TBP	NAEYNPKR	97	126.128	605901	127.131	288561	719064	664873	318422	0.478922	-1.06214	-1.06214
						0	3.82292	JL121323_121323_ABP_127_30B.45416.45416.6	P	3.426	0.177031	0.364	//13	9//65	3.33925	1.18182	R.LDLK[1397.75]TVALHAR.N	Spt15	1	TBP	LDLKTVALHAR	83	//10	2//43	0.08675	0.125	R.NAEYNPK[1643]R.F	Spt15	1	TBP	NAEYNPKR	97	126.128	40057	127.131	19694.8	147659	43948.2	21732.9	0.494513	-1.01592	-1.01592
						0	1.93862	JL121323_121323_ABP_127_30B.09948.09948.3	P	3.28575	0.174015	0.778	//13	11//41	3.0825	1.36364	R.LDLK[1397.75]TVALHAR.N	Spt15	1	TBP	LDLKTVALHAR	83	//10	3//27	0.20325	0.1875	R.NAEYNPK[1643]R.F	Spt15	1	TBP	NAEYNPKR	97	126.127	11519602	127.13	5.50256e+06	92097016	1.26406e+07	6.07198e+06	0.480356	-1.05782	-1.05782
2	TFIIA2
	1	TFIIA2:---TFIIA2:119	4.15725	0.109904	-0.109904
						-2	1.17837	JL121323_121323_ABP_127_50B.06538.06538.3	N	4.15725	0.210905		//10	6//25	2.08725	0.928571	R.IVAC[160.03]NSK[1839.01]K.S	Toa2	1	TFIIA2	IVACNSKK	119	//13	5//43	2.07	0.6	R.IVAC[160.03]NSK[1325.76]K[425.27]SE.-	Toa2	1	TFIIA2	IVACNSKKSE		126.127	64687.7	127.131	68965.2	226658	70519.9	76102	1.07916	0.109904	0.109904
	2	TFIIA2:---TFIIA2:46	7.631	-0.167578	0.167578
						0	1.03688	JL121323_121323_ABP_127_D.19013.19013.4	N	7.631	0.197285		//13	9//57	2.234	1.1	R.IVAC[160.03]NSK[425.27]K[1998.15]SE.-	Toa2	1	TFIIA2	IVACNSKKSE		1//16	17//74	5.397	1.80769	R.VLETFDK[1839.01]VVAETLK.D	Toa2	1	TFIIA2	VLETFDKVVAETLK	46	126.128	488125	127.131	430232	978521	533230	474754	0.890336	-0.167578	-0.167578
	3	TFIIA2:110---TFIIA2:46	6.12075	-0.0170044	0.0170044
						-2	9.40833	JL121323_121323_ABP_127_30B.23907.23907.4	NP	6.12075	0.176737	0.0375	//21	14//118	4.89975	1.05	R.DASQNGSGDSQSVISVDK[1998.15]LR.I	Toa2	1	TFIIA2	DASQNGSGDSQSVISVDKLR	110	1//16	9//74	1.221	0.678571	R.VLETFDK[2469.25]VVAETLK.D	Toa2	1	TFIIA2	VLETFDKVVAETLK	46	126.128	373322	127.131	347943	444661	407589	383949	0.942001	-0.0861997	-0.0861997
						-2	6.30383	JL121323_121323_ABP_127_30B.23925.23925.4	P	4.81875	0.130372	0.666	//21	11//118	3.722	0.675	R.DASQNGSGDSQSVISVDK[1998.15]LR.I	Toa2	1	TFIIA2	DASQNGSGDSQSVISVDKLR	110	3//16	9//74	1.09675	0.571429	R.VLETFDK[2469.25]VVAETLK.D	Toa2	1	TFIIA2	VLETFDKVVAETLK	46	126.127	361971	127.131	370944	408656	394788	409331	1.03684	0.0521908	0.0521908
	4	TFIIA2:110---TFIIA2:53	7.90325	-0.252747	0.252747
						-1	6.78103	JL121323_121323_ABP_127_1ug.12539.12539.4	N	7.90325	0.205905		//15	10//66	1.963	1.08333	K.VVAETLK[2469.23]DNTQSK.L	Toa2	1	TFIIA2	VVAETLKDNTQSK	53	1//21	16//118	5.94025	1.10526	R.DASQNGSGDSQSVISVDK[1838.99]LR.I	Toa2	1	TFIIA2	DASQNGSGDSQSVISVDKLR	110	126.128	95956.2	127.131	79771.5	277656	104881	88026.5	0.839297	-0.252747	-0.252747
	5	TFIIA2:110---TFIIA2:81	10.0817	-0.163642	0.163642
						-1	4.47081	JL121323_121323_ABP_127_D.26231.26231.5	N	10.0817	0.238599		//21	10//154	2.33825	0.631579	R.DASQNGSGDSQSVISVDK[3881.85]LR.I	Toa2	1	TFIIA2	DASQNGSGDSQSVISVDKLR	110	1//6	22//233	7.7435	1.07143	K.GNLDTYGFC[160.03]DDVWTFIVK[2469.28]NC[160.03]QVTVEDSHR.D	Toa2	1	TFIIA2	GNLDTYGFCDDVWTFIVKNCQVTVEDSHR	81	126.127	115012	127.131	101646	332061	125637	112164	0.892769	-0.163642	-0.163642
	6	TFIIA2:119---TFIIA2:46	9.28475	-0.287516	0.287516
						0	-0.301648	JL121323_121323_ABP_127_50B.17738.17738.3	NP	9.28475	0.297746	0.583	//16	20//53	7.17025	2.17857	R.VLETFDK[1325.76]VVAETLK.D	Toa2	1	TFIIA2	VLETFDKVVAETLK	46	//10	8//24	2.1145	1.3125	R.IVAC[160.03]NSK[1998.15]K.S	Toa2	1	TFIIA2	IVACNSKK	119	126.128	2.37287e+06	127.131	1.81843e+06	4383478	2.59545e+06	2.00661e+06	0.773125	-0.371226	-0.371226
						0	3.17375	JL121323_121323_ABP_127_50B.17791.17791.4	NP	8.21625	0.242457	0.00668	//16	18//74	7.24625	1.92857	R.VLETFDK[1325.76]VVAETLK.D	Toa2	1	TFIIA2	VLETFDKVVAETLK	46	//10	5//32	0.97	0.75	R.IVAC[160.03]NSK[1998.15]K.S	Toa2	1	TFIIA2	IVACNSKK	119	126.128	3.55294e+06	127.131	3.24025e+06	8.02275e+06	3.87993e+06	3.57556e+06	0.921553	-0.117861	-0.117861
						-3	4.29465	JL121323_121323_ABP_127_70B.16693.16693.3	N	7.64425	0.264223		//10	10//24	2.22175	1.85714	R.IVAC[160.03]NSK[1998.14]K.S	Toa2	1	TFIIA2	IVACNSKK	119	//16	20//53	5.4225	2	R.VLETFDK[1325.74]VVAETLK.D	Toa2	1	TFIIA2	VLETFDKVVAETLK	46	126.128	1152742	127.131	793056	3.61013e+06	1.26197e+06	875124	0.693459	-0.528118	-0.528118
						0	4.28501	JL121323_121323_ABP_127_D.17966.17966.3	N	6.63375	0.185274		//10	8//24	2.372	1.5	R.IVAC[160.03]NSK[1998.14]K.S	Toa2	1	TFIIA2	IVACNSKK	119	1//16	18//53	4.26175	1.65385	R.VLETFDK[1325.74]VVAETLK.D	Toa2	1	TFIIA2	VLETFDKVVAETLK	46	126.127	1.40116e+06	127.131	1001918	5.59216e+06	1.53347e+06	1.1056e+06	0.72098	-0.471969	-0.471969
						0	2.38579	JL121323_121323_ABP_127_30B.15764.15764.4	P	6.13525	0.175058	0.0815	1//16	17//74	5.40125	1.78571	R.VLETFDK[1325.76]VVAETLK.D	Toa2	1	TFIIA2	VLETFDKVVAETLK	46	//10	5//32	0.734	0.625	R.IVAC[160.03]NSK[1998.15]K.S	Toa2	1	TFIIA2	IVACNSKK	119	126.128	3.36951e+06	127.131	2692804	4.67733e+06	3.68423e+06	2.97147e+06	0.806535	-0.31019	-0.31019
						0	4.11016	JL121323_121323_ABP_127_30B.15783.15783.5	P	5.949	0.197967	0.136	//16	20//95	5.443	1.92857	R.VLETFDK[1325.76]VVAETLK.D	Toa2	1	TFIIA2	VLETFDKVVAETLK	46	//10	5//40	0.506	0.4375	R.IVAC[160.03]NSK[1998.15]K.S	Toa2	1	TFIIA2	IVACNSKK	119	126.128	350387	127.131	304344	1.96988e+06	382819	335838	0.877278	-0.188894	-0.188894
						0	1.7025	JL121323_121323_ABP_127_50B.17757.17757.5	P	5.63475	0.174881	0.62	//16	20//95	5.1375	1.82143	R.VLETFDK[1325.76]VVAETLK.D	Toa2	1	TFIIA2	VLETFDKVVAETLK	46	//10	5//40	0.49725	0.4375	R.IVAC[160.03]NSK[1998.15]K.S	Toa2	1	TFIIA2	IVACNSKK	119	126.128	261555	127.131	238654	1.17193e+06	285624	263351	0.922017	-0.117135	-0.117135
						0	1.92138	JL121323_121323_ABP_127_30B.15803.15803.5	P	5.28375	0.169424	0.164	//16	19//95	4.82875	1.67857	R.VLETFDK[1325.76]VVAETLK.D	Toa2	1	TFIIA2	VLETFDKVVAETLK	46	//10	4//40	0.455	0.375	R.IVAC[160.03]NSK[1998.15]K.S	Toa2	1	TFIIA2	IVACNSKK	119	126.128	287840	127.131	249015	1.34006e+06	314495	274784	0.873733	-0.194736	-0.194736
	7	TFIIA2:119---TFIIA2:53	9.809	-0.0530058	0.0530058
						0	3.83804	JL121323_121323_ABP_127_1ug.06667.06667.3	NP	9.809	0.377429	5.7e-05	//15	17//50	6.3675	1.88462	K.VVAETLK[1325.76]DNTQSK.L	Toa2	1	TFIIA2	VVAETLKDNTQSK	53	//10	9//25	3.4415	1.375	R.IVAC[160.03]NSK[1839.02]K.S	Toa2	1	TFIIA2	IVACNSKK	119	126.128	28846	127.131	27316.5	314007	31488.5	30143.3	0.957279	-0.0629887	-0.0629887
						0	2.51494	JL121323_121323_ABP_127_1ug.06654.06654.3	NP	8.9275	0.398531	2.13e-05	//15	15//50	4.9805	1.57692	K.VVAETLK[1325.76]DNTQSK.L	Toa2	1	TFIIA2	VVAETLKDNTQSK	53	//10	9//25	3.947	1.375	R.IVAC[160.03]NSK[1839.02]K.S	Toa2	1	TFIIA2	IVACNSKK	119	126.127	25561.4	127.131	22800.1	273772	27920	25159.5	0.901127	-0.150197	-0.150197
						0	2.51494	JL121323_121323_ABP_127_50B.06512.06512.3	NP	7.71975	0.331135	0.00524	//15	14//50	4.31625	1.46154	K.VVAETLK[1325.76]DNTQSK.L	Toa2	1	TFIIA2	VVAETLKDNTQSK	53	//10	9//25	3.4035	1.5625	R.IVAC[160.03]NSK[1839.02]K.S	Toa2	1	TFIIA2	IVACNSKK	119	126.127	72571.5	127.131	74471.4	355326	79149.7	82178	1.03826	0.0541684	0.0541684
	8	TFIIA2:120---TFIIA2:46	9.159	-0.20933	0.20933
						0	-0.808193	JL121323_121323_ABP_127_50B.20016.20016.3	P	9.159	0.251998	0.629	//16	21//53	8.6245	2.21429	R.VLETFDK[1839.01]VVAETLK.D	Toa2	1	TFIIA2	VLETFDKVVAETLK	46	//12	5//37	0.5345	0.35	R.IVAC[160.03]NSK[425.27]K[1998.15]SE.-	Toa2	1	TFIIA2	IVACNSKKSE	120	126.127	497786	127.131	442361	2.60099e+06	543739	488138	0.897743	-0.155626	-0.155626
						-1	1.90514	JL121323_121323_ABP_127_30B.18172.18172.4	NP	7.7065	0.238946	0.381	//16	19//74	5.49175	1.75	R.VLETFDK[1839.01]VVAETLK.D	Toa2	1	TFIIA2	VLETFDKVVAETLK	46	//12	11//51	2.21475	1.05	R.IVAC[160.03]NSK[425.27]K[1998.15]SE.-	Toa2	1	TFIIA2	IVACNSKKSE	120	126.128	1.32354e+06	127.131	1.09255e+06	1.63972e+06	1.44674e+06	1.20561e+06	0.833334	-0.263034	-0.263034
	9	TFIIA2:46---TFIIA2:59	8.36625	-0.110937	0.110937
						-2	1.13203	JL121323_121323_ABP_127_30B.20431.20431.3	N	8.36625	0.213476		//12	8//34	1.35325	1	K.DNTQSK[1998.14]LTVK.G	Toa2	1	TFIIA2	DNTQSKLTVK	59	1//16	19//53	7.013	2.11538	R.VLETFDK[1539.87]VVAETLK.D	Toa2	1	TFIIA2	VLETFDKVVAETLK	46	126.127	584761	127.131	541427	1.75731e+06	638479	597456	0.935748	-0.0958076	-0.0958076
						-1	-2.13558	JL121323_121323_ABP_127_30B.20421.20421.3	NP	7.1655	0.190465	0.0378	1//16	19//53	4.99	1.75	R.VLETFDK[1539.87]VVAETLK.D	Toa2	1	TFIIA2	VLETFDKVVAETLK	46	//12	10//34	2.1755	1.1	K.DNTQSK[1998.15]LTVK.G	Toa2	1	TFIIA2	DNTQSKLTVK	59	126.127	559131	127.131	507849	1.19024e+06	610615	560403	0.917768	-0.123798	-0.123798
						0	0.482176	JL121323_121323_ABP_127_50B.22083.22083.4	P	6.38225	0.211518	0.00886	1//16	17//74	5.68925	1.78571	R.VLETFDK[1539.87]VVAETLK.D	Toa2	1	TFIIA2	VLETFDKVVAETLK	46	//12	7//44	0.693	0.85	K.DNTQSK[1998.15]LTVK.G	Toa2	1	TFIIA2	DNTQSKLTVK	59	126.128	655468	127.131	585119	655468	715946	645669	0.901841	-0.149056	-0.149056
						0	-0.737444	JL121323_121323_ABP_127_50B.22125.22125.4	P	6.28875	0.219017	0.397	2//16	16//74	5.77325	1.60714	R.VLETFDK[1539.87]VVAETLK.D	Toa2	1	TFIIA2	VLETFDKVVAETLK	46	//12	5//44	0.5155	0.6	K.DNTQSK[1998.15]LTVK.G	Toa2	1	TFIIA2	DNTQSKLTVK	59	126.128	725321	127.131	653179	725321	792175	720772	0.909865	-0.136276	-0.136276
						-3	0.770552	JL121323_121323_ABP_127_30B.20440.20440.3	N	6.043	0.175228		//12	7//34	1.44275	0.944444	K.DNTQSK[1998.15]LTVK.G	Toa2	1	TFIIA2	DNTQSKLTVK	59	2//16	17//53	4.60025	1.46154	R.VLETFDK[1539.87]VVAETLK.D	Toa2	1	TFIIA2	VLETFDKVVAETLK	46	126.127	586191	127.131	583007	1.71667e+06	639550	643338	1.00592	0.00851918	0.00851918
						0	4.22235	JL121323_121323_ABP_127_70B.20073.20073.4	P	5.903	0.18516	0.000703	1//16	15//74	5.26	1.60714	R.VLETFDK[1539.87]VVAETLK.D	Toa2	1	TFIIA2	VLETFDKVVAETLK	46	//12	6//44	0.643	0.8	K.DNTQSK[1998.15]LTVK.G	Toa2	1	TFIIA2	DNTQSKLTVK	59	126.128	284598	127.131	248994	284598	310918	274761	0.883708	-0.178359	-0.178359
						0	5.37625	JL121323_121323_ABP_127_30B.23476.23476.4	N	5.1395	0.1599		1//12	7//44	0.90375	0.944444	K.DNTQSK[1998.16]LTVK.G	Toa2	1	TFIIA2	DNTQSKLTVK	59	1//16	12//74	4.23575	0.961538	R.VLETFDK[1539.89]VVAETLK.D	Toa2	1	TFIIA2	VLETFDKVVAETLK	46	126.128	652051	127.131	601261	3.05136e+06	711980	663482	0.931882	-0.101781	-0.101781
3	TFIIA1
	1	TFIIA1:177---TFIIA1:183	15.889	-0.265247	0.265247
						-2	12.9477	JL121323_121323_ABP_127_50B.20735.20735.5	P	15.889	0.455488	0.25	//17	33//239	15.4522	1.87931	K.IEVKPEIELTINNANITTVENIDDESEK[1770.82]K.D	Toa1	1	TFIIA1	IEVKPEIELTINNANITTVENIDDESEKK	177	//13	4//68	0.43675	0.409091	K.DDEEK[3704.94]EEDVEK.T	Toa1	1	TFIIA1	DDEEKEEDVEK	183	126.128	316346	127.131	260741	388282	345798	287723	0.832057	-0.265247	-0.265247
	2	TFIIA1:177---TFIIA1:189	18.8875	-0.258938	0.258938
						-2	9.63169	JL121323_121323_ABP_127_50B.20464.20464.5	P	18.8875	0.559679	0.785	//11	49//283	18.8465	2.11765	K.IEVKPEIELTINNANITTVENIDDESEK[1393.73]KDDEEK.E	Toa1	1	TFIIA1	IEVKPEIELTINNANITTVENIDDESEKKDDEEK	177	//11	1//46	0.041	0.0625	K.E[111.03]EDVEK[4321.18]TR.K	Toa1	1	TFIIA1	EEDVEKTR	189	126.128	238467	127.131	194137	466535	260697	214227	0.821748	-0.283231	-0.283231
						-2	1.85433	JL121323_121323_ABP_127_70B.18546.18546.5	P	18.0207	0.449631	0.164	//11	47//283	17.8738	2.10294	K.IEVKPEIELTINNANITTVENIDDESEK[1393.73]KDDEEK.E	Toa1	1	TFIIA1	IEVKPEIELTINNANITTVENIDDESEKKDDEEK	177	//11	2//46	0.147	0.25	K.E[111.03]EDVEK[4321.18]TR.K	Toa1	1	TFIIA1	EEDVEKTR	189	126.127	134647	127.131	113336	244740	147153	125065	0.849894	-0.234645	-0.234645
	3	TFIIA1:178---TFIIA1:189	22.2922	-0.0721588	0.0721588
						-1	6.22757	JL121323_121323_ABP_127_50B.23046.23046.6	P	22.2922	0.592186	0.354	//12	52//289	22.085	2.23529	K.IEVK[425.27]PEIELTINNANITTVENIDDESEKK[1393.73]DDEEK.E	Toa1	1	TFIIA1	IEVKPEIELTINNANITTVENIDDESEKKDDEEK	178	//11	3//46	0.20725	0.3125	K.E[111.03]EDVEK[4618.36]TR.K	Toa1	1	TFIIA1	EEDVEKTR	189	126.128	426138	127.131	400789	745241	465208	442264	0.950681	-0.0729674	-0.0729674
						0	-3.70765	JL121323_121323_ABP_127_70B.18442.18442.5	P	18.6995	0.50458	0.00905	//12	52//284	18.5495	2.22059	K.IEVKPEIELTINNANITTVENIDDESEKK[1393.73]DDEEK.E	Toa1	1	TFIIA1	IEVKPEIELTINNANITTVENIDDESEKKDDEEK	178	//11	2//46	0.15	0.25	K.E[111.03]EDVEK[4321.18]TR.K	Toa1	1	TFIIA1	EEDVEKTR	189	126.128	141995	127.131	133697	283695	155012	147532	0.951747	-0.0713502	-0.0713502
	4	TFIIA1:183---TFIIA1:201	2.6515	0.177558	-0.177558
						0	0.450706	JL121323_121323_ABP_127_30B.07084.07084.4	P	2.6515	0.116891	0.582	//16	6//77	0.9345	0.392857	K.KDDEEK[1720]EEDVEKTR.K	Toa1	1	TFIIA1	KDDEEKEEDVEKTR	183	//13	6//51	1.717	0.5	K.EQIEQVK[2156.07]LQAK.K	Toa1	1	TFIIA1	EQIEQVKLQAK	201	126.127	19547.3	127.131	21828.1	184238	21297.6	24086.9	1.13097	0.177558	0.177558
	5	TFIIA1:189---TFIIA1:192	6.59125	0.438758	-0.438758
						0	3.5637	JL121323_121323_ABP_127_50B.05536.05536.5	P	6.59125	0.275422	0.327	1//16	19//100	4.83	1.60714	K.KDDEEKEEDVEK[1664.95]TR.K	Toa1	1	TFIIA1	KDDEEKEEDVEKTR	189	1//11	12//62	1.76125	1.25	R.K[2156.07]EKEQIEQVK.L	Toa1	1	TFIIA1	KEKEQIEQVK	192	126.128	111390	127.131	141088	1.04242e+06	121162	155688	1.28496	0.361724	0.361724
						0	3.85043	JL121323_121323_ABP_127_50B.05537.05537.3	P	6.52425	0.317737	0.0476	//16	16//56	4.649	1.42857	K.KDDEEKEEDVEK[1664.95]TR.K	Toa1	1	TFIIA1	KDDEEKEEDVEKTR	189	//11	6//38	1.87525	0.85	R.K[2156.07]EKEQIEQVK.L	Toa1	1	TFIIA1	KEKEQIEQVK	192	126.127	34118.6	127.131	48009.7	556890	37053.2	52977.9	1.42978	0.515792	0.515792
	6	TFIIA1:189---TFIIA1:201	3.86875	0.269054	-0.269054
						-3	-89.7306	JL121323_121323_ABP_127_30B.07064.07064.4	P	3.86875	0.143962	0.127	//16	9//78	1.64625	0.571429	K.KDDEEKEEDVEK[1720]TR.K	Toa1	1	TFIIA1	KDDEEKEEDVEKTR	189	//13	8//51	2.2225	0.772727	K.EQIEQVK[2156.07]LQAK.K	Toa1	1	TFIIA1	EQIEQVKLQAK	201	126.127	19155.6	127.131	22772.8	236190	20854	25129.5	1.20502	0.269054	0.269054
	7	TFIIA1:194---TFIIA1:255	6.02475	0.0842653	-0.0842653
						0	2.60118	JL121323_121323_ABP_127_30B.04989.04989.3	P	6.02475	0.258712	0.0571	//9	11//37	5.225	2	K.EK[881.55]EQIEQVK.L	Toa1	1	TFIIA1	EKEQIEQVK	194	1//4	5//13	0.79975	1.125	R.TK[1536.86]AR.W	Toa1	1	TFIIA1	TKAR	255	126.127	52538.6	127.131	52454.7	533194	57318.7	57882.9	1.00984	0.0141314	0.0141314
						0	1.25096	JL121323_121323_ABP_127_30B.07400.07400.4	P	5.89275	0.214442	0.257	//13	19//79	5.51525	2.07692	K.EK[881.55]EQIEQVK[425.27]LQAK.K	Toa1	1	TFIIA1	EKEQIEQVKLQAK	194	1//4	3//15	0.3775	0.625	R.TK[2274.31]AR.W	Toa1	1	TFIIA1	TKAR	255	126.128	117794	127.131	107482	538010	128634	118605	0.922028	-0.117117	-0.117117
						0	2.72378	JL121323_121323_ABP_127_30B.05030.05030.4	P	5.556	0.265736	0.00142	//9	14//44	5.2565	2.16667	K.EK[881.55]EQIEQVK.L	Toa1	1	TFIIA1	EKEQIEQVK	194	//4	2//17	0.2995	0.5	R.TK[1536.86]AR.W	Toa1	1	TFIIA1	TKAR	255	126.127	32958.2	127.13	36668.4	37348.5	35911	40463	1.12676	0.172178	0.172178
						0	0.710189	JL121323_121323_ABP_127_50B.07533.07533.5	P	4.24775	0.185589	0.648	//13	15//99	4.03725	1.73077	K.EK[881.55]EQIEQVK[425.27]LQAK.K	Toa1	1	TFIIA1	EKEQIEQVKLQAK	194	//4	2//19	0.2105	0.5	R.TK[2274.31]AR.W	Toa1	1	TFIIA1	TKAR	255	126.128	191758	127.131	199689	199689	209104	220353	1.0538	0.0755958	0.0755958
						0	-0.56579	JL121323_121323_ABP_127_30B.05592.05592.5	P	4.0065	0.184521	0.254	//13	15//77	3.684	2.1	R.K[425.27]EK[881.55]EQIEQVK.L	Toa1	1	TFIIA1	KEKEQIEQVK	194	1//4	3//19	0.3225	0.625	R.TK[1962.13]AR.W	Toa1	1	TFIIA1	TKAR	255	126.127	55790.2	127.131	73512.5	73512.5	60649.6	81119.9	1.33752	0.419557	0.419557
						-4	-20.9376	JL121323_121323_ABP_127_30B.05117.05117.4	P	3.85725	0.181347	0.0463	//9	10//44	3.33125	1.44444	K.EK[881.55]EQIEQVK.L	Toa1	1	TFIIA1	EKEQIEQVK	194	//4	4//17	0.526	1	R.TK[1536.86]AR.W	Toa1	1	TFIIA1	TKAR	255	126.127	39149.9	127.131	39322.9	39322.9	42708.9	43392.1	1.016	0.0228966	0.0228966
						0	0.710189	JL121323_121323_ABP_127_50B.07524.07524.5	P	3.6755	0.15022	0.655	//13	17//99	3.57625	1.69231	K.EK[881.55]EQIEQVK[425.27]LQAK.K	Toa1	1	TFIIA1	EKEQIEQVKLQAK	194	1//4	2//19	0.09925	0.25	R.TK[2274.31]AR.W	Toa1	1	TFIIA1	TKAR	255	126.128	173643	127.131	186344	186344	189284	205628	1.08635	0.119489	0.119489
						0	1.99121	JL121323_121323_ABP_127_30B.07433.07433.5	P	1.965	0.08048	0.355	//13	11//99	1.7165	1	K.EK[881.55]EQIEQVK[425.27]LQAK.K	Toa1	1	TFIIA1	EKEQIEQVKLQAK	194	//4	2//19	0.2485	0.5	R.TK[2274.31]AR.W	Toa1	1	TFIIA1	TKAR	255	126.128	77717.5	127.131	75146.1	117605	84818	82922.5	0.977652	-0.0326074	-0.0326074
	8	TFIIA1:201---TFIIA1:206	6.11475	0.29643	-0.29643
						0	3.29943	JL121323_121323_ABP_127_50B.06003.06003.4	N	6.11475	0.216993		//4	4//15	1.0515	1.33333	R.K[1977.14]EK.E	Toa1	1	TFIIA1	KEK	206	1//15	18//77	5.06325	1.95833	K.EKEQIEQVK[810.51]LQAK.K	Toa1	1	TFIIA1	EKEQIEQVKLQAK	201	126.128	81411.1	127.131	130062	214628	88225.1	143522	1.62677	0.702007	0.702007
						0	1.99995	JL121323_121323_ABP_127_30B.06770.06770.5	P	5.9885	0.2204	0.523	//13	17//67	5.9885	2.22727	K.EQIEQVK[1263.78]LQAK.K	Toa1	1	TFIIA1	EQIEQVKLQAK	201	//5	//26	0	0	K.K[1720]EK[425.27]R.S	Toa1	1	TFIIA1	KEKR	206	126.128	149483	127.131	148769	337853	163089	164164	1.00659	0.00948046	0.00948046
						0	2.78857	JL121323_121323_ABP_127_50B.06040.06040.4	P	5.76575	0.261551	0.25	1//13	18//59	5.61725	2.27273	K.EQIEQVK[966.61]LQAK.K	Toa1	1	TFIIA1	EQIEQVKLQAK	201	//5	2//21	0.1485	0.5	K.K[1720]EKR.S	Toa1	1	TFIIA1	KEKR	206	126.128	88653.1	127.131	125062	211207	96274.6	138004	1.43344	0.519478	0.519478
						0	3.35601	JL121323_121323_ABP_127_30B.05990.05990.4	P	5.2465	0.225215	0.0148	//13	16//59	5.2465	2.18182	K.EQIEQVK[966.61]LQAK.K	Toa1	1	TFIIA1	EQIEQVKLQAK	201	//5	//21	0	0	K.K[1720]EKR.S	Toa1	1	TFIIA1	KEKR	206	126.128	74619.1	127.131	112435	326025	80946.9	124070	1.53274	0.616109	0.616109
						-542	19.6354	JL121323_121323_ABP_127_30B.05846.05846.5	P	4.2695	0.192047	0.151	//13	13//71	3.784	1.54545	K.EQIEQVK[966.61]LQAK.K	Toa1	1	TFIIA1	EQIEQVKLQAK	201	//5	2//26	0.4855	0.5	K.K[1720]EKR.S	Toa1	1	TFIIA1	KEKR	206	126.127	24381.4	127.131	34292.6	47318	26478.7	37841.3	1.42912	0.515132	0.515132
						0	1.98558	JL121323_121323_ABP_127_50B.05686.05686.5	P	3.6445	0.139516	0.641	//15	13//93	3.61725	1.26923	K.EKEQIEQVK[966.61]LQAK.K	Toa1	1	TFIIA1	EKEQIEQVKLQAK	201	//5	1//24	0.02725	0.125	K.K[1977.13]EKR.S	Toa1	1	TFIIA1	KEKR	206	126.128	61589.1	127.131	138602	138602	66255.1	152945	2.30842	1.20691	1.20691
						3	-69.8438	JL121323_121323_ABP_127_30B.05880.05880.4	P	3.6345	0.140382	0.119	//13	12//59	3.2275	1.5	K.EQIEQVK[966.61]LQAK.K	Toa1	1	TFIIA1	EQIEQVKLQAK	201	//5	2//21	0.407	0.5	K.K[1720]EKR.S	Toa1	1	TFIIA1	KEKR	206	126.127	49292.2	127.131	54377.1	66674.1	53714.1	60004.3	1.1171	0.159764	0.159764
						0	1.77398	JL121323_121323_ABP_127_30B.06771.06771.3	P	3.5735	0.154707	0.0949	1//13	15//43	3.22175	1.59091	K.EQIEQVK[1263.78]LQAK.K	Toa1	1	TFIIA1	EQIEQVKLQAK	201	//5	3//16	0.35175	0.625	K.K[1720]EK[425.27]R.S	Toa1	1	TFIIA1	KEKR	206	126.128	128517	127.131	135126	1.30528e+06	140127	149109	1.0641	0.0896361	0.0896361
						0	3.56882	JL121323_121323_ABP_127_30B.06764.06764.3	P	3.294	0.147224	0.0551	1//13	12//43	2.745	1.22727	K.EQIEQVK[1263.78]LQAK.K	Toa1	1	TFIIA1	EQIEQVKLQAK	201	//5	3//16	0.549	0.625	K.K[1720]EK[425.27]R.S	Toa1	1	TFIIA1	KEKR	206	126.127	113014	127.131	117949	1.24936e+06	123233	130155	1.05616	0.078835	0.078835
						0	3.86254	JL121323_121323_ABP_127_30B.06758.06758.4	P	2.9985	0.111504	0.0131	//13	15//55	2.78725	1.86364	K.EQIEQVK[1263.78]LQAK.K	Toa1	1	TFIIA1	EQIEQVKLQAK	201	//5	1//21	0.21125	0.125	K.K[1720]EK[425.27]R.S	Toa1	1	TFIIA1	KEKR	206	126.128	130098	127.131	136884	821264	141850	151049	1.06485	0.0906556	0.0906556
						0	-0.425138	JL121323_121323_ABP_127_50B.06804.06804.4	P	2.4695	0.118189	0.582	//13	12//55	2.237	1.22727	K.EQIEQVK[1263.78]LQAK.K	Toa1	1	TFIIA1	EQIEQVKLQAK	201	//5	2//21	0.2325	0.25	K.K[1720]EK[425.27]R.S	Toa1	1	TFIIA1	KEKR	206	126.127	187882	127.13	202489	450907	204795	223444	1.09106	0.125732	0.125732
						975	184.773	JL121323_121323_ABP_127_30B.06763.06763.3	P	1.60325	0.0555161	0.549	//13	6//43	1.5575	0.727273	K.EQIEQVK[1263.78]LQAK.K	Toa1	1	TFIIA1	EQIEQVKLQAK	201	//5	1//16	0.04575	0.125	K.K[1720]EK[425.27]R.S	Toa1	1	TFIIA1	KEKR	206	126.128	149514	127.131	156162	156162	163034	172322	1.05697	0.0799402	0.0799402
						0	5.25853	JL121323_121323_ABP_127_30B.07300.07300.4	P	1.36875	0.04105	0.655	//13	9//55	1.308	0.818182	K.EQIEQVK[1263.78]LQAK.K	Toa1	1	TFIIA1	EQIEQVKLQAK	201	//5	1//21	0.06075	0.125	K.K[1720]EK[425.27]R.S	Toa1	1	TFIIA1	KEKR	206	126.128	141510	127.131	138114	538404	154423	152407	0.986942	-0.0189621	-0.0189621
						0	2.65513	JL121323_121323_ABP_127_30B.06804.06804.6	P	1.326	0.0736442	0.68	//13	8//67	1.24925	0.818182	K.EQIEQVK[1263.78]LQAK.K	Toa1	1	TFIIA1	EQIEQVKLQAK	201	//5	1//26	0.07675	0.125	K.K[1720]EK[425.27]R.S	Toa1	1	TFIIA1	KEKR	206	126.127	49454.8	127.131	48078.8	49454.8	53970	53054.2	0.98303	-0.0246919	-0.0246919
	9	TFIIA1:201---TFIIA1:208	8.0935	0.475777	-0.475777
						0	4.1962	JL121323_121323_ABP_127_50B.07077.07077.5	P	8.0935	0.320066	0.00418	1//15	23//97	7.763	2.65385	K.EK[425.27]EQIEQVK[966.61]LQAK.K	Toa1	1	TFIIA1	EKEQIEQVKLQAK	201	//6	5//19	0.3305	1.125	K.KEK[2274.31]R.S	Toa1	1	TFIIA1	KEKR	208	126.127	218527	127.131	281763	383786	237636	310921	1.30839	0.387792	0.387792
						0	2.82311	JL121323_121323_ABP_127_30B.05991.05991.3	P	5.24875	0.209214	0.0128	1//13	16//47	4.68275	2.04545	K.EQIEQVK[966.61]LQAK.K	Toa1	1	TFIIA1	EQIEQVKLQAK	201	//6	4//13	0.566	0.75	K.KEK[1720]R.S	Toa1	1	TFIIA1	KEKR	208	126.128	57921.1	127.131	92521.5	738313	62769.1	102096	1.62653	0.701799	0.701799
						0	4.01474	JL121323_121323_ABP_127_50B.06020.06020.3	P	5.2025	0.242654	0.615	1//13	15//47	4.88525	1.86364	K.EQIEQVK[966.61]LQAK.K	Toa1	1	TFIIA1	EQIEQVKLQAK	201	//6	3//13	0.31725	0.375	K.KEK[1720]R.S	Toa1	1	TFIIA1	KEKR	208	126.127	58984.9	127.13	79504.8	299515	64100.8	87732.2	1.36866	0.452763	0.452763
						0	1.13682	JL121323_121323_ABP_127_30B.06019.06019.5	P	1.8815	0.103836	0.561	//13	11//71	1.82175	1.36364	K.EQIEQVK[966.61]LQAK.K	Toa1	1	TFIIA1	EQIEQVKLQAK	201	//6	1//21	0.05975	0.125	K.KEK[1720]R.S	Toa1	1	TFIIA1	KEKR	208	126.128	58298.6	127.131	73792.5	99020.9	63413.2	81428.8	1.2841	0.360755	0.360755
	10	TFIIA1:201---TFIIA1:255	5.3715	0.260543	-0.260543
						0	0.908908	JL121323_121323_ABP_127_30B.06507.06507.4	P	5.3715	0.208242	0.0312	//13	16//60	5.332	2.04545	K.EQIEQVK[881.55]LQAK.K	Toa1	1	TFIIA1	EQIEQVKLQAK	201	1//4	2//17	0.0395	0.25	R.TK[1720]AR.W	Toa1	1	TFIIA1	TKAR	255	126.128	62990.6	127.131	73580.1	100350	68591.7	81194.4	1.18374	0.243347	0.243347
						0	1.02707	JL121323_121323_ABP_127_30B.06673.06673.4	P	5.03625	0.222331	0.0322	//13	16//60	4.81675	1.86364	K.EQIEQVK[881.55]LQAK.K	Toa1	1	TFIIA1	EQIEQVKLQAK	201	1//4	3//17	0.2195	0.625	R.TK[1720]AR.W	Toa1	1	TFIIA1	TKAR	255	126.127	48864	127.131	58437.5	58437.5	53192.4	64484.8	1.21229	0.277739	0.277739
	11	TFIIA1:250---TFIIA1:259	20.1767	0.0439543	-0.0439543
						0	2.33204	JL121323_121323_ABP_127_30B.31815.31815.5	P	20.1767	0.428213	0.125	//14	47//376	19.9952	1.61364	R.SALLDTDEVGSELDDSDDDYLISEGEEDGPDENLMLC[160.03]LYDK[1227.69]VTR.T	Toa1	1	TFIIA1	SALLDTDEVGSELDDSDDDYLISEGEEDGPDENLMLCLYDKVTR	250	1//6	3//29	0.1815	0.416667	R.WK[5357.42]C[160.03]SLK.D	Toa1	1	TFIIA1	WKCSLK	259	126.127	157059	127.131	155062	921153	171369	171109	0.998479	-0.00219543	-0.00219543
						0	1.11233	JL121323_121323_ABP_127_30B.27166.27166.5	P	19.6472	0.399732	0.0458	//14	49//376	19.3352	1.64773	R.SALLDTDEVGSELDDSDDDYLISEGEEDGPDENLM[147.04]LC[160.03]LYDK[1227.69]VTR.T	Toa1	1	TFIIA1	SALLDTDEVGSELDDSDDDYLISEGEEDGPDENLMLCLYDKVTR	250	1//6	4//29	0.312	0.5	R.WK[5373.42]C[160.03]SLK.D	Toa1	1	TFIIA1	WKCSLK	259	126.127	250845	127.131	254098	1.49e+06	273622	280393	1.02475	0.035266	0.035266
						-1	7.61255	JL121323_121323_ABP_127_50B.28398.28398.5	P	19.3167	0.396274	0.000484	1//14	49//376	19.1477	1.61364	R.SALLDTDEVGSELDDSDDDYLISEGEEDGPDENLM[147.04]LC[160.03]LYDK[1227.69]VTR.T	Toa1	1	TFIIA1	SALLDTDEVGSELDDSDDDYLISEGEEDGPDENLMLCLYDKVTR	250	1//6	3//29	0.169	0.25	R.WK[5373.42]C[160.03]SLK.D	Toa1	1	TFIIA1	WKCSLK	259	126.127	177393	127.131	173254	712377	193580	191183	0.987617	-0.017976	-0.017976
						-1	2.39257	JL121323_121323_ABP_127_30B.31790.31790.5	P	19.0042	0.392873	0.0152	//14	46//376	18.766	1.48864	R.SALLDTDEVGSELDDSDDDYLISEGEEDGPDENLMLC[160.03]LYDK[1227.69]VTR.T	Toa1	1	TFIIA1	SALLDTDEVGSELDDSDDDYLISEGEEDGPDENLMLCLYDKVTR	250	//6	3//29	0.23825	0.416667	R.WK[5357.42]C[160.03]SLK.D	Toa1	1	TFIIA1	WKCSLK	259	126.127	112599	127.131	120098	532316	122750	132527	1.07965	0.110564	0.110564
						0	3.12478	JL121323_121323_ABP_127_30B.27458.27458.5	P	18.9295	0.395775	0.00159	1//14	51//376	18.3535	1.67045	R.SALLDTDEVGSELDDSDDDYLISEGEEDGPDENLM[147.04]LC[160.03]LYDK[1227.69]VTR.T	Toa1	1	TFIIA1	SALLDTDEVGSELDDSDDDYLISEGEEDGPDENLMLCLYDKVTR	250	1//6	5//29	0.576	1.08333	R.WK[5373.42]C[160.03]SLK.D	Toa1	1	TFIIA1	WKCSLK	259	126.127	238036	127.131	255166	1565221	259480	281572	1.08514	0.11788	0.11788
						0	0.50859	JL121323_121323_ABP_127_70B.24786.24786.5	P	17.5132	0.395632	1.05e-10	//14	44//376	17.3195	1.46591	R.SALLDTDEVGSELDDSDDDYLISEGEEDGPDENLM[147.04]LC[160.03]LYDK[1227.69]VTR.T	Toa1	1	TFIIA1	SALLDTDEVGSELDDSDDDYLISEGEEDGPDENLMLCLYDKVTR	250	1//6	3//29	0.19375	0.416667	R.WK[5373.42]C[160.03]SLK.D	Toa1	1	TFIIA1	WKCSLK	259	126.127	96863	127.131	104730	514132	105578	115568	1.09462	0.130432	0.130432
						-3	2.70216	JL121323_121323_ABP_127_70B.24858.24858.5	P	17.356	0.377978	6.46e-09	//14	46//376	17.2653	1.51136	R.SALLDTDEVGSELDDSDDDYLISEGEEDGPDENLM[147.04]LC[160.03]LYDK[1227.69]VTR.T	Toa1	1	TFIIA1	SALLDTDEVGSELDDSDDDYLISEGEEDGPDENLMLCLYDKVTR	250	//6	2//29	0.09075	0.166667	R.WK[5373.42]C[160.03]SLK.D	Toa1	1	TFIIA1	WKCSLK	259	126.127	65103.1	127.13	65199	265318	71023.8	71946	1.01298	0.0186106	0.0186106
						-2	2.2393	JL121323_121323_ABP_127_50B.28352.28352.5	P	17.04	0.380769	6.16e-05	//14	40//376	16.678	1.38636	R.SALLDTDEVGSELDDSDDDYLISEGEEDGPDENLM[147.04]LC[160.03]LYDK[1227.69]VTR.T	Toa1	1	TFIIA1	SALLDTDEVGSELDDSDDDYLISEGEEDGPDENLMLCLYDKVTR	250	1//6	4//29	0.362	0.75	R.WK[5373.42]C[160.03]SLK.D	Toa1	1	TFIIA1	WKCSLK	259	126.128	96747	127.131	103362	243228	105467	114059	1.08146	0.112984	0.112984
						0	5.13723	JL121323_121323_ABP_127_30B.27875.27875.5	P	16.6532	0.380807	0.693	//14	42//376	16.5063	1.44318	R.SALLDTDEVGSELDDSDDDYLISEGEEDGPDENLM[147.04]LC[160.03]LYDK[1227.69]VTR.T	Toa1	1	TFIIA1	SALLDTDEVGSELDDSDDDYLISEGEEDGPDENLMLCLYDKVTR	250	1//6	3//29	0.147	0.25	R.WK[5373.42]C[160.03]SLK.D	Toa1	1	TFIIA1	WKCSLK	259	126.127	108215	127.131	108889	281374	118050	120157	1.01785	0.0255256	0.0255256
						-3	4.01026	JL121323_121323_ABP_127_30B.27916.27916.5	P	16.2485	0.360973	0.141	//14	41//376	16.0815	1.31818	R.SALLDTDEVGSELDDSDDDYLISEGEEDGPDENLM[147.04]LC[160.03]LYDK[1227.69]VTR.T	Toa1	1	TFIIA1	SALLDTDEVGSELDDSDDDYLISEGEEDGPDENLMLCLYDKVTR	250	1//6	3//29	0.167	0.25	R.WK[5373.42]C[160.03]SLK.D	Toa1	1	TFIIA1	WKCSLK	259	126.127	101839	127.131	105557	253025	111057	116481	1.04884	0.0687916	0.0687916
						-3	3.60777	JL121323_121323_ABP_127_30B.27969.27969.5	P	15.9965	0.362794	0.229	//14	40//376	15.811	1.21591	R.SALLDTDEVGSELDDSDDDYLISEGEEDGPDENLM[147.04]LC[160.03]LYDK[1227.69]VTR.T	Toa1	1	TFIIA1	SALLDTDEVGSELDDSDDDYLISEGEEDGPDENLMLCLYDKVTR	250	1//6	3//29	0.1855	0.25	R.WK[5373.42]C[160.03]SLK.D	Toa1	1	TFIIA1	WKCSLK	259	126.128	100823	127.131	98899.3	272155	110018	109134	0.991967	-0.0116364	-0.0116364
						-1	4.79511	JL121323_121323_ABP_127_30B.27885.27885.5	P	15.497	0.343568	0.768	//14	42//376	15.4042	1.23864	R.SALLDTDEVGSELDDSDDDYLISEGEEDGPDENLM[147.04]LC[160.03]LYDK[1227.69]VTR.T	Toa1	1	TFIIA1	SALLDTDEVGSELDDSDDDYLISEGEEDGPDENLMLCLYDKVTR	250	1//6	2//29	0.09275	0.166667	R.WK[5373.42]C[160.03]SLK.D	Toa1	1	TFIIA1	WKCSLK	259	126.127	111792	127.131	106024	290650	122031	116996	0.958736	-0.0607946	-0.0607946
	12	TFIIA1:255---TFIIA1:259	9.2085	0.109672	-0.109672
						0	2.03188	JL121323_121323_ABP_127_50B.10283.10283.5	P	9.2085	0.338119	0.103	//14	28//109	8.875	2.64286	R.WK[881.55]C[160.03]SLK[425.27]DGVVTINR.N	Toa1	1	TFIIA1	WKCSLKDGVVTINR	259	//4	2//19	0.3335	0.5	R.TK[2379.33]AR.W	Toa1	1	TFIIA1	TKAR	255	126.127	279173	127.13	346563	346563	303748	382426	1.25903	0.332307	0.332307
						0	2.81567	JL121323_121323_ABP_127_30B.09258.09258.5	P	8.8685	0.297896	0.0107	//14	28//109	8.79675	2.92857	R.WK[881.55]C[160.03]SLK[425.27]DGVVTINR.N	Toa1	1	TFIIA1	WKCSLKDGVVTINR	259	//4	2//19	0.07175	0.25	R.TK[2379.33]AR.W	Toa1	1	TFIIA1	TKAR	255	126.128	503638	127.131	518433	608904	549270	572083	1.04153	0.0587076	0.0587076
						0	2.77922	JL121323_121323_ABP_127_50B.08029.08029.5	P	8.73475	0.326356	0.752	1//14	27//101	8.716	2.78571	R.WK[881.55]C[160.03]SLKDGVVTINR.N	Toa1	1	TFIIA1	WKCSLKDGVVTINR	259	//4	1//19	0.01875	0.125	R.TK[2082.15]AR.W	Toa1	1	TFIIA1	TKAR	255	126.128	259182	127.131	253074	1041028	282832	279263	0.987382	-0.0183201	-0.0183201
						0	1.64817	JL121323_121323_ABP_127_30B.07828.07828.5	P	8.5805	0.328013	0.0437	1//14	27//101	8.5695	2.78571	R.WK[881.55]C[160.03]SLKDGVVTINR.N	Toa1	1	TFIIA1	WKCSLKDGVVTINR	259	//4	1//19	0.011	0.125	R.TK[2082.15]AR.W	Toa1	1	TFIIA1	TKAR	255	126.128	198950	127.131	187386	909951	217187	206777	0.952069	-0.0708614	-0.0708614
						0	4.49522	JL121323_121323_ABP_127_70B.09505.09505.5	P	7.3655	0.280302	4.55e-07	//14	23//109	7.0795	2.14286	R.WK[881.55]C[160.03]SLK[425.27]DGVVTINR.N	Toa1	1	TFIIA1	WKCSLKDGVVTINR	259	//4	2//19	0.286	0.5	R.TK[2379.33]AR.W	Toa1	1	TFIIA1	TKAR	255	126.127	104351	127.131	126275	126275	113576	139343	1.22687	0.294979	0.294979
						0	2.82239	JL121323_121323_ABP_127_30B.07839.07839.4	P	7.3585	0.264224	0.027	//14	27//82	7.3035	2.60714	R.WK[881.55]C[160.03]SLKDGVVTINR.N	Toa1	1	TFIIA1	WKCSLKDGVVTINR	259	//4	2//15	0.055	0.25	R.TK[2082.15]AR.W	Toa1	1	TFIIA1	TKAR	255	126.128	421439	127.131	386950	3053813	460193	426993	0.927855	-0.108028	-0.108028
						0	3.02346	JL121323_121323_ABP_127_50B.08033.08033.4	P	6.96025	0.31242	0.688	//14	23//82	6.88225	2.17857	R.WK[881.55]C[160.03]SLKDGVVTINR.N	Toa1	1	TFIIA1	WKCSLKDGVVTINR	259	//4	2//15	0.078	0.25	R.TK[2082.15]AR.W	Toa1	1	TFIIA1	TKAR	255	126.128	572016	127.131	621888	2.83771e+06	623442	686243	1.10073	0.138465	0.138465
						0	2.0494	JL121323_121323_ABP_127_50B.10129.10129.6	P	6.45975	0.243489	0.184	//14	20//109	6.417	1.96429	R.WK[881.55]C[160.03]SLK[425.27]DGVVTINR.N	Toa1	1	TFIIA1	WKCSLKDGVVTINR	259	//4	1//19	0.04275	0.125	R.TK[2379.33]AR.W	Toa1	1	TFIIA1	TKAR	255	126.128	233345	127.131	273777	518938	254079	302109	1.18904	0.249793	0.249793
						0	2.65404	JL121323_121323_ABP_127_30B.09325.09325.6	P	5.418	0.196882	0.123	//14	17//109	5.38325	1.53571	R.WK[881.55]C[160.03]SLK[425.27]DGVVTINR.N	Toa1	1	TFIIA1	WKCSLKDGVVTINR	259	//4	1//19	0.03475	0.125	R.TK[2379.33]AR.W	Toa1	1	TFIIA1	TKAR	255	126.128	147542	127.131	174310	344215	160637	192348	1.1974	0.259911	0.259911
						0	0.239009	JL121323_121323_ABP_127_30B.07830.07830.3	P	4.81275	0.159876	0.361	//14	19//63	4.31	1.57143	R.WK[881.55]C[160.03]SLKDGVVTINR.N	Toa1	1	TFIIA1	WKCSLKDGVVTINR	259	//4	3//11	0.50275	0.625	R.TK[2082.15]AR.W	Toa1	1	TFIIA1	TKAR	255	126.128	193295	127.131	190568	1.63777e+06	210911	210289	0.997051	-0.00426035	-0.00426035
						-1	7.09291	JL121323_121323_ABP_127_50B.10009.10009.5	P	4.34175	0.177323	0.696	//14	15//109	4.00325	1.32143	R.WK[881.55]C[160.03]SLK[425.27]DGVVTINR.N	Toa1	1	TFIIA1	WKCSLKDGVVTINR	259	//4	2//19	0.3385	0.5	R.TK[2379.33]AR.W	Toa1	1	TFIIA1	TKAR	255	126.128	363705	127.131	400871	479735	396337	442355	1.11611	0.158476	0.158476
						0	3.44317	JL121323_121323_ABP_127_30B.05563.05563.3	P	3.329	0.12694	0.288	//6	8//21	2.897	2	R.WK[881.55]C[160.03]SLK.D	Toa1	1	TFIIA1	WKCSLK	259	//4	3//13	0.432	0.625	R.TK[1227.69]AR.W	Toa1	1	TFIIA1	TKAR	255	126.128	185050	127.131	183140	1.04826e+06	201906	202092	1.00092	0.00133125	0.00133125
						0	3.32683	JL121323_121323_ABP_127_30B.05718.05718.3	P	3.1715	0.131942	0.19	//6	8//21	2.7535	2	R.WK[881.55]C[160.03]SLK.D	Toa1	1	TFIIA1	WKCSLK	259	//4	3//13	0.418	0.625	R.TK[1227.69]AR.W	Toa1	1	TFIIA1	TKAR	255	126.128	158361	127.131	162884	952836	172711	179740	1.0407	0.0575502	0.0575502
						0	2.39611	JL121323_121323_ABP_127_30B.06312.06312.3	P	2.86875	0.160615	0.0924	//6	7//21	2.341	1.66667	R.WK[881.55]C[160.03]SLK.D	Toa1	1	TFIIA1	WKCSLK	259	//4	5//13	0.52775	1.125	R.TK[1227.69]AR.W	Toa1	1	TFIIA1	TKAR	255	126.127	62522.9	127.13	65374.4	263768	68175.4	72139.6	1.05815	0.0815401	0.0815401
						0	2.27977	JL121323_121323_ABP_127_30B.06010.06010.3	P	2.66575	0.139386	0.337	//6	8//21	2.3605	2	R.WK[881.55]C[160.03]SLK.D	Toa1	1	TFIIA1	WKCSLK	259	//4	4//13	0.30525	0.75	R.TK[1227.69]AR.W	Toa1	1	TFIIA1	TKAR	255	126.127	77298.4	127.131	79028.2	328103	84308.6	87206.3	1.03437	0.0487524	0.0487524
						0	1.81441	JL121323_121323_ABP_127_30B.06460.06460.3	P	2.30375	0.094748	0.254	//6	8//21	1.961	2	R.WK[881.55]C[160.03]SLK.D	Toa1	1	TFIIA1	WKCSLK	259	//4	4//13	0.34275	0.75	R.TK[1227.69]AR.W	Toa1	1	TFIIA1	TKAR	255	126.127	53934.4	127.13	63457.9	177347	58724.7	70024.8	1.19243	0.253899	0.253899
						0	2.97781	JL121323_121323_ABP_127_30B.05866.05866.3	P	2.2875	0.123389	0.692	//6	8//21	2.104	2	R.WK[881.55]C[160.03]SLK.D	Toa1	1	TFIIA1	WKCSLK	259	//4	3//13	0.1835	0.375	R.TK[1227.69]AR.W	Toa1	1	TFIIA1	TKAR	255	126.127	76713.6	127.131	80213	500485	83649.1	88513.7	1.05815	0.0815509	0.0815509
						548	-111.5	JL121323_121323_ABP_127_30B.09154.09154.4	P	2.112	0.0824533	0.734	//14	14//85	2.09225	1	R.WK[881.55]C[160.03]SLK[425.27]DGVVTINR.N	Toa1	1	TFIIA1	WKCSLKDGVVTINR	259	//4	1//15	0.01975	0.125	R.TK[2379.33]AR.W	Toa1	1	TFIIA1	TKAR	255	126.128	467454	127.131	470671	1.32555e+06	509935	519378	1.01852	0.0264698	0.0264698
						0	1.93075	JL121323_121323_ABP_127_30B.06160.06160.3	P	1.78425	0.0970255	0.52	//6	7//21	1.45925	1.41667	R.WK[881.55]C[160.03]SLK.D	Toa1	1	TFIIA1	WKCSLK	259	//4	3//13	0.325	0.625	R.TK[1227.69]AR.W	Toa1	1	TFIIA1	TKAR	255	126.127	51505.8	127.13	52301.5	224952	56181.2	57713.8	1.02728	0.0388282	0.0388282
						0	0.301996	JL121323_121323_ABP_127_30B.06687.06687.3	P	1.22825	0.0582123	0.169	//6	5//21	0.8705	1	R.WK[881.55]C[160.03]SLK.D	Toa1	1	TFIIA1	WKCSLK	259	//4	4//13	0.35775	0.75	R.TK[1227.69]AR.W	Toa1	1	TFIIA1	TKAR	255	126.127	68657.7	127.131	84076.4	144257	74715.5	92776.9	1.24174	0.312359	0.312359
	13	TFIIA1:255---TFIIA1:263	6.26425	0.126777	-0.126777
						-1	-1.19284	JL121323_121323_ABP_127_50B.09976.09976.5	P	6.26425	0.254603	0.779	//16	20//107	5.89975	1.85714	R.WK[425.27]C[160.03]SLK[881.55]DGVVTINR.N	Toa1	1	TFIIA1	WKCSLKDGVVTINR	263	//4	2//19	0.3645	0.5	R.TK[2379.33]AR.W	Toa1	1	TFIIA1	TKAR	255	126.127	292536	127.131	315506	315506	318867	348155	1.09185	0.126777	0.126777
4	TFIIB
	1	TFIIB:---TFIIB:314	12.9965	-0.051153	0.051153
						-2	3.34012	JL121323_121323_ABP_127_30B.25343.25343.7	N	12.9965	0.419668		//12	7//47	1.154	1	K.SGYK[3364.9]ILYEHR.D	Sua7	1	TFIIB	SGYKILYEHR	314	1//19	35//154	11.8425	1.89583	R.DK[425.27]LVDPQLIANGVVSLDNLPGVEK[1671.9]K.-	Sua7	1	TFIIB	DKLVDPQLIANGVVSLDNLPGVEKK		126.128	154544	127.131	140175	427327	168777	154681	0.916481	-0.125823	-0.125823
						-2	2.39142	JL121323_121323_ABP_127_30B.23206.23206.7	N	11.0243	0.386728		1//12	7//47	1.10925	1	K.SGYK[3364.9]ILYEHR.D	Sua7	1	TFIIB	SGYKILYEHR	314	//19	31//154	9.915	1.47917	R.DK[425.27]LVDPQLIANGVVSLDNLPGVEK[1671.91]K.-	Sua7	1	TFIIB	DKLVDPQLIANGVVSLDNLPGVEKK		126.127	182739	127.13	153524	253396	199717	169411	0.848257	-0.237427	-0.237427
						-1	4.13668	JL121323_121323_ABP_127_30B.24689.24689.6	N	9.91225	0.317314		//12	5//47	1.2145	0.888889	K.SGYK[2824.63]ILYEHR.D	Sua7	1	TFIIB	SGYKILYEHR	314	//19	30//138	8.69775	1.5	K.LVDPQLIANGVVSLDNLPGVEK[1671.93]K.-	Sua7	1	TFIIB	LVDPQLIANGVVSLDNLPGVEKK		126.128	386718	127.131	431910	1641084	421345	476606	1.13115	0.177796	0.177796
						-1	4.85278	JL121323_121323_ABP_127_30B.24685.24685.6	N	5.4515	0.162855		//12	4//47	0.9055	0.666667	K.SGYK[3364.94]ILYEHR.D	Sua7	1	TFIIB	SGYKILYEHR	314	//19	24//154	4.546	1.02083	R.DK[1671.94]LVDPQLIANGVVSLDNLPGVEK[425.27]K.-	Sua7	1	TFIIB	DKLVDPQLIANGVVSLDNLPGVEKK		126.128	286496	127.131	279584	424726	312640	308516	0.986808	-0.0191585	-0.0191585
	2	TFIIB:108---TFIIB:116	4.00775	0.706172	-0.706172
						0	0.579967	JL121323_121323_ABP_127_30B.05363.05363.4	NP	4.00775	0.239727	0.000451	//12	13//48	2.874	1.55	K.AQGK[1285.75]NVM[147.04]DKK.D	Sua7	1	TFIIB	AQGKNVMDKK	116	//9	6//30	1.13375	1	R.FTK[1540.85]ELNK.A	Sua7	1	TFIIB	FTKELNK	108	126.127	15610.4	127.131	31354.5	117815	16838.9	34599.1	2.05471	1.03894	1.03894
						0	2.41658	JL121323_121323_ABP_127_1ug.06003.06003.4	NP	3.9545	0.165999	0.304	//11	12//44	2.66925	1.66667	K.AQGK[1285.75]NVM[147.04]DK.K	Sua7	1	TFIIB	AQGKNVMDK	116	//9	5//32	1.28525	0.928571	R.FTK[1412.75]ELNK.A	Sua7	1	TFIIB	FTKELNK	108	126.127	28064.4	127.131	40870.1	104150	30461.6	45099.5	1.48054	0.56612	0.56612
						0	1.66078	JL121323_121323_ABP_127_30B.06416.06416.4	NP	2.6745	0.12694	0.501	//12	5//54	0.67075	0.5	K.AQGK[1285.75]NVM[147.04]DKK[425.27].D	Sua7	1	TFIIB	AQGKNVMDKK	116	//9	7//28	2.00375	1.21429	R.FTK[1838.02]ELNK.A	Sua7	1	TFIIB	FTKELNK	108	126.127	33351.5	127.131	39646.7	202290	36308.7	43749.4	1.20493	0.268951	0.268951
						-2	9.21084	JL121323_121323_ABP_127_30B.05350.05350.4	P	2.20075	0.132328	0.00413	//12	7//48	0.91975	0.45	K.AQGK[1285.75]NVM[147.04]DKK.D	Sua7	1	TFIIB	AQGKNVMDKK	116	//9	7//30	1.281	1.07143	R.FTK[1540.85]ELNK.A	Sua7	1	TFIIB	FTKELNK	108	126.127	13895.2	127.131	23345.9	79663.7	15044.2	25761.8	1.7124	0.776024	0.776024
						0	1.18304	JL121323_121323_ABP_127_1ug.06014.06014.5	P	2.09625	0.114318	0.643	//11	6//53	1.02875	0.611111	K.AQGK[1285.75]NVM[147.04]DK.K	Sua7	1	TFIIB	AQGKNVMDK	116	//9	5//39	1.0675	0.928571	R.FTK[1412.75]ELNK.A	Sua7	1	TFIIB	FTKELNK	108	126.127	21742.1	127.131	30650.6	46587.6	23611.5	33822.5	1.43245	0.518489	0.518489
						0	-0.0269213	JL121323_121323_ABP_127_30B.05357.05357.3	P	2.078	0.183992	0.794	//12	4//38	1.101	0.4	K.AQGK[1285.75]NVM[147.04]DKK.D	Sua7	1	TFIIB	AQGKNVMDKK	116	//9	4//23	0.977	0.571429	R.FTK[1540.85]ELNK.A	Sua7	1	TFIIB	FTKELNK	108	126.127	7195.01	127.131	17354.2	118811	7725.98	19150.1	2.47866	1.30956	1.30956
						0	2.70525	JL121323_121323_ABP_127_30B.05370.05370.5	P	1.71825	0.103068	0.113	//12	4//58	0.496	0.3	K.AQGK[1285.75]NVM[147.04]DKK.D	Sua7	1	TFIIB	AQGKNVMDKK	116	//9	7//37	1.22225	1.07143	R.FTK[1540.85]ELNK.A	Sua7	1	TFIIB	FTKELNK	108	126.127	22205.2	127.131	30183.6	30183.6	24128	33307.1	1.38043	0.465121	0.465121
	3	TFIIB:108---TFIIB:121	2.96	0.92146	-0.92146
						0	2.12296	JL121323_121323_ABP_127_30B.05870.05870.3	NP	2.96	0.170901	0.402	//9	8//26	1.85525	1.5	R.FTK[1156.64]ELNK.A	Sua7	1	TFIIB	FTKELNK	108	//8	6//21	1.10475	0.916667	K.NVM[147.04]DK[1285.75]K.D	Sua7	1	TFIIB	NVMDKK	121	126.127	15524.1	127.131	28792.6	91685	16774.9	31772.1	1.89403	0.92146	0.92146
	4	TFIIB:108---TFIIB:132	10.8645	0.120313	-0.120313
						-1	1.20613	JL121323_121323_ABP_127_30B.28243.28243.4	P	10.8645	0.291641	0.00103	//17	28//128	10.458	1.86364	K.DNEVQAAFAK[1285.75]ITM[147.04]LC[160.03]DAAELPK.I	Sua7	1	TFIIB	DNEVQAAFAKITMLCDAAELPK	132	1//9	5//28	0.4065	0.714286	R.FTK[2857.44]ELNK.A	Sua7	1	TFIIB	FTKELNK	108	126.128	375303	127.131	412927	412927	408984	455659	1.11412	0.155908	0.155908
						0	1.81515	JL121323_121323_ABP_127_30B.28138.28138.4	P	10.5865	0.308847	0.00715	//17	26//128	10.464	1.79545	K.DNEVQAAFAK[1285.75]ITM[147.04]LC[160.03]DAAELPK.I	Sua7	1	TFIIB	DNEVQAAFAKITMLCDAAELPK	132	//9	2//28	0.1225	0.285714	R.FTK[2857.44]ELNK.A	Sua7	1	TFIIB	FTKELNK	108	126.128	297934	127.131	327847	327847	324671	361774	1.11428	0.156109	0.156109
						-2	1.40913	JL121323_121323_ABP_127_30B.28266.28266.4	P	9.63375	0.250172	0.00989	//17	25//128	9.3095	1.77273	K.DNEVQAAFAK[1285.75]ITM[147.04]LC[160.03]DAAELPK.I	Sua7	1	TFIIB	DNEVQAAFAKITMLCDAAELPK	132	//9	4//28	0.32425	0.642857	R.FTK[2857.44]ELNK.A	Sua7	1	TFIIB	FTKELNK	108	126.128	364708	127.131	384417	384417	397643	424198	1.06678	0.0932607	0.0932607
						-2	-2.44803	JL121323_121323_ABP_127_50B.29428.29428.4	P	7.57625	0.195204	0.187	//17	24//128	7.397	1.61364	K.DNEVQAAFAK[1285.75]ITM[147.04]LC[160.03]DAAELPK.I	Sua7	1	TFIIB	DNEVQAAFAKITMLCDAAELPK	132	//9	3//28	0.17925	0.357143	R.FTK[2857.44]ELNK.A	Sua7	1	TFIIB	FTKELNK	108	126.127	310457	127.131	336742	363550	338378	371589	1.09815	0.135073	0.135073
						-2	0.288904	JL121323_121323_ABP_127_30B.28238.28238.5	P	5.51975	0.178232	0.0234	//17	24//171	5.4065	1.52273	K.DNEVQAAFAK[1285.75]ITM[147.04]LC[160.03]DAAELPK.I	Sua7	1	TFIIB	DNEVQAAFAKITMLCDAAELPK	132	//9	3//35	0.11325	0.357143	R.FTK[2857.44]ELNK.A	Sua7	1	TFIIB	FTKELNK	108	126.128	256356	127.131	246840	321679	279790	272384	0.973528	-0.0387058	-0.0387058
						-1	3.06336	JL121323_121323_ABP_127_30B.28185.28185.5	P	5.358	0.169123	0.000713	//17	23//171	5.24725	1.43182	K.DNEVQAAFAK[1285.75]ITM[147.04]LC[160.03]DAAELPK.I	Sua7	1	TFIIB	DNEVQAAFAKITMLCDAAELPK	132	//9	3//35	0.11075	0.357143	R.FTK[2857.44]ELNK.A	Sua7	1	TFIIB	FTKELNK	108	126.127	171907	127.131	186858	186858	187362	206194	1.10051	0.138172	0.138172
						-1	2.38666	JL121323_121323_ABP_127_50B.29345.29345.5	P	2.49075	0.0732703	0.709	//17	19//171	2.46025	0.863636	K.DNEVQAAFAK[1285.75]ITM[147.04]LC[160.03]DAAELPK.I	Sua7	1	TFIIB	DNEVQAAFAKITMLCDAAELPK	132	//9	2//35	0.0305	0.142857	R.FTK[2857.44]ELNK.A	Sua7	1	TFIIB	FTKELNK	108	126.128	169146	127.131	192118	194763	184253	211999	1.15059	0.202373	0.202373
	5	TFIIB:108---TFIIB:161	2.426	0.585509	-0.585509
						0	0.0127093	JL121323_121323_ABP_127_30B.06708.06708.3	P	2.426	0.113494	0.735	//11	6//35	0.8245	0.444444	K.LC[160.03]HDEK[1285.75]TLK.G	Sua7	1	TFIIB	LCHDEKTLK	161	//9	5//23	1.6015	0.857143	R.FTK[1549.84]ELNK.A	Sua7	1	TFIIB	FTKELNK	108	126.128	27871.5	127.131	41129.4	133044	30245.6	45385.6	1.50057	0.585509	0.585509
	6	TFIIB:108---TFIIB:33	2.717	0.122554	-0.122554
						-4	-18.9689	JL121323_121323_ABP_127_30B.08650.08650.4	P	2.717	0.106794	0.0334	1//11	12//45	2.01025	1.5	K.VYPPK[1285.75]IVER.F	Sua7	1	TFIIB	VYPPKIVER	33	//9	5//31	0.70675	0.714286	R.FTK[1506.9]ELNK.A	Sua7	1	TFIIB	FTKELNK	108	126.128	203585	127.131	218674	356622	221920	241304	1.08735	0.12081	0.12081
						0	2.44607	JL121323_121323_ABP_127_30B.08699.08699.4	P	2.615	0.11169	0.0752	1//11	9//45	1.967	1.05556	K.VYPPK[1285.75]IVER.F	Sua7	1	TFIIB	VYPPKIVER	33	//9	5//31	0.648	0.714286	R.FTK[1506.9]ELNK.A	Sua7	1	TFIIB	FTKELNK	108	126.128	165338	127.131	173898	265978	180274	191894	1.06446	0.090118	0.090118
						0	0.0666268	JL121323_121323_ABP_127_30B.08687.08687.4	P	2.43975	0.12463	0.328	//11	9//45	1.79025	1.05556	K.VYPPK[1285.75]IVER.F	Sua7	1	TFIIB	VYPPKIVER	33	//9	5//31	0.6495	0.714286	R.FTK[1506.9]ELNK.A	Sua7	1	TFIIB	FTKELNK	108	126.128	186656	127.131	205485	410284	203406	226749	1.11476	0.156735	0.156735
	7	TFIIB:108---TFIIB:55	15.9388	0.123076	-0.123076
						0	0.653985	JL121323_121323_ABP_127_30B.29828.29828.4	P	15.9388	0.427846	0.000189	1//15	36//137	15.556	2.41304	R.FSEGDVVC[160.03]ALC[160.03]GLVLSDK[1285.75]LVDTR.S	Sua7	1	TFIIB	FSEGDVVCALCGLVLSDKLVDTR	55	//9	4//28	0.38275	0.428571	R.FTK[2959.52]ELNK.A	Sua7	1	TFIIB	FTKELNK	108	126.127	339286	127.131	355394	583196	369952	392171	1.06006	0.0841447	0.0841447
						-2	4.5166	JL121323_121323_ABP_127_70B.27032.27032.5	P	14.0285	0.360158	5.68e-20	1//15	37//184	13.8168	2.32609	R.FSEGDVVC[160.03]ALC[160.03]GLVLSDK[1285.75]LVDTR.S	Sua7	1	TFIIB	FSEGDVVCALCGLVLSDKLVDTR	55	//9	4//35	0.21175	0.428571	R.FTK[2959.52]ELNK.A	Sua7	1	TFIIB	FTKELNK	108	126.128	90624	127.131	91998.5	158520	98850.7	101519	1.02699	0.0384245	0.0384245
						0	0.259139	JL121323_121323_ABP_127_70B.27075.27075.4	P	13.8667	0.344665	2.59e-16	//15	33//137	13.4977	2.13043	R.FSEGDVVC[160.03]ALC[160.03]GLVLSDK[1285.75]LVDTR.S	Sua7	1	TFIIB	FSEGDVVCALCGLVLSDKLVDTR	55	1//9	4//28	0.369	0.285714	R.FTK[2959.52]ELNK.A	Sua7	1	TFIIB	FTKELNK	108	126.128	180741	127.131	206143	431863	196872	227476	1.15545	0.208452	0.208452
						-2	-1.48834	JL121323_121323_ABP_127_50B.31025.31025.5	P	13.388	0.343352	6.06e-05	1//15	39//184	13.0855	2.36957	R.FSEGDVVC[160.03]ALC[160.03]GLVLSDK[1285.75]LVDTR.S	Sua7	1	TFIIB	FSEGDVVCALCGLVLSDKLVDTR	55	//9	4//35	0.3025	0.642857	R.FTK[2959.52]ELNK.A	Sua7	1	TFIIB	FTKELNK	108	126.128	259067	127.131	255299	506139	282678	281719	0.996605	-0.00490678	-0.00490678
						0	0.0416838	JL121323_121323_ABP_127_50B.31039.31039.5	P	13.349	0.354909	2.76e-05	//15	36//184	12.989	2.23913	R.FSEGDVVC[160.03]ALC[160.03]GLVLSDK[1285.75]LVDTR.S	Sua7	1	TFIIB	FSEGDVVCALCGLVLSDKLVDTR	55	//9	4//35	0.36	0.642857	R.FTK[2959.52]ELNK.A	Sua7	1	TFIIB	FTKELNK	108	126.128	227134	127.131	240646	529813	247631	265549	1.07236	0.100787	0.100787
						0	2.09817	JL121323_121323_ABP_127_30B.29839.29839.5	P	12.984	0.348409	2.44e-05	1//15	39//184	12.7097	2.36957	R.FSEGDVVC[160.03]ALC[160.03]GLVLSDK[1285.75]LVDTR.S	Sua7	1	TFIIB	FSEGDVVCALCGLVLSDKLVDTR	55	//9	4//35	0.27425	0.642857	R.FTK[2959.52]ELNK.A	Sua7	1	TFIIB	FTKELNK	108	126.128	394748	127.131	432142	1.00406e+06	430201	476861	1.10846	0.148559	0.148559
						-2	6.32631	JL121323_121323_ABP_127_50B.31016.31016.5	P	12.6415	0.33794	0.00154	//15	36//184	12.3483	2.36957	R.FSEGDVVC[160.03]ALC[160.03]GLVLSDK[1285.75]LVDTR.S	Sua7	1	TFIIB	FSEGDVVCALCGLVLSDKLVDTR	55	//9	4//35	0.29325	0.642857	R.FTK[2959.52]ELNK.A	Sua7	1	TFIIB	FTKELNK	108	126.128	241294	127.131	249517	481175	263143	275338	1.04635	0.0653598	0.0653598
						-1	3.9644	JL121323_121323_ABP_127_50B.31074.31074.3	P	12.2135	0.335716	0.0814	1//15	29//90	11.981	1.97826	R.FSEGDVVC[160.03]ALC[160.03]GLVLSDK[1285.75]LVDTR.S	Sua7	1	TFIIB	FSEGDVVCALCGLVLSDKLVDTR	55	//9	3//21	0.2325	0.571429	R.FTK[2959.52]ELNK.A	Sua7	1	TFIIB	FTKELNK	108	126.128	133601	127.131	150710	740132	145546	166306	1.14263	0.192363	0.192363
						0	-1.89248	JL121323_121323_ABP_127_30B.29890.29890.3	P	11.2465	0.288527	0.000418	1//15	26//90	11.134	1.71739	R.FSEGDVVC[160.03]ALC[160.03]GLVLSDK[1285.75]LVDTR.S	Sua7	1	TFIIB	FSEGDVVCALCGLVLSDKLVDTR	55	//9	3//21	0.1125	0.357143	R.FTK[2959.52]ELNK.A	Sua7	1	TFIIB	FTKELNK	108	126.128	173853	127.131	204098	1.33223e+06	189299	225218	1.18975	0.250658	0.250658
						-1	4.47083	JL121323_121323_ABP_127_50B.31029.31029.4	P	10.9505	0.294455	0.0521	1//15	31//137	10.5595	1.76087	R.FSEGDVVC[160.03]ALC[160.03]GLVLSDK[1285.75]LVDTR.S	Sua7	1	TFIIB	FSEGDVVCALCGLVLSDKLVDTR	55	//9	4//28	0.391	0.642857	R.FTK[2959.52]ELNK.A	Sua7	1	TFIIB	FTKELNK	108	126.127	258246	127.131	287296	287296	281383	317026	1.12667	0.172066	0.172066
						0	-3.07702	JL121323_121323_ABP_127_70B.27069.27069.3	P	10.1212	0.257669	1.22e-06	1//15	26//90	9.88075	1.65217	R.FSEGDVVC[160.03]ALC[160.03]GLVLSDK[1285.75]LVDTR.S	Sua7	1	TFIIB	FSEGDVVCALCGLVLSDKLVDTR	55	//9	3//21	0.2405	0.571429	R.FTK[2959.52]ELNK.A	Sua7	1	TFIIB	FTKELNK	108	126.127	81813.4	127.131	94898	494210	89096.3	104718	1.17534	0.233078	0.233078
						-1	4.25337	JL121323_121323_ABP_127_30B.29813.29813.5	P	9.5745	0.267504	0.00135	//15	33//184	9.36825	2.02174	R.FSEGDVVC[160.03]ALC[160.03]GLVLSDK[1285.75]LVDTR.S	Sua7	1	TFIIB	FSEGDVVCALCGLVLSDKLVDTR	55	//9	3//35	0.20625	0.357143	R.FTK[2959.52]ELNK.A	Sua7	1	TFIIB	FTKELNK	108	126.128	347607	127.131	373137	1.07871e+06	378916	411750	1.08665	0.119893	0.119893
						-2	1.11464	JL121323_121323_ABP_127_30B.29784.29784.4	P	9.3175	0.242019	0.0218	1//15	26//137	9.14825	1.47826	R.FSEGDVVC[160.03]ALC[160.03]GLVLSDK[1285.75]LVDTR.S	Sua7	1	TFIIB	FSEGDVVCALCGLVLSDKLVDTR	55	//9	3//28	0.16925	0.357143	R.FTK[2959.52]ELNK.A	Sua7	1	TFIIB	FTKELNK	108	126.127	218148	127.131	226148	241463	237894	249551	1.049	0.0690107	0.0690107
						0	5.73524	JL121323_121323_ABP_127_30B.28432.28432.6	P	8.747	0.256879	0.0101	//15	26//183	8.48875	1.54348	R.FSEGDVVC[160.03]ALC[160.03]GLVLSDK[1967.14]LVDTR.S	Sua7	1	TFIIB	FSEGDVVCALCGLVLSDKLVDTR	55	//13	5//74	0.25825	0.318182	R.FTK[2959.52]ELNK[425.27]AQGK.N	Sua7	1	TFIIB	FTKELNKAQGK	108	126.127	161001	127.131	175703	254524	175467	193885	1.10497	0.144003	0.144003
						-2	7.10837	JL121323_121323_ABP_127_30B.35697.35697.4	P	4.03025	0.117384	0.727	1//10	21//159	3.94875	1	R.FSEGDVVC[160.03]ALC[160.03]GLVLSDK[1285.75]LVDTRSEWR.T	Sua7	1	TFIIB	FSEGDVVCALCGLVLSDKLVDTRSEWR	55	//9	3//28	0.0815	0.214286	R.FTK[3517.78]ELNK.A	Sua7	1	TFIIB	FTKELNK	108	126.127	30592.5	127.131	30756.1	132533	33373.3	33938.9	1.01695	0.0242462	0.0242462
	8	TFIIB:108---TFIIB:9	3.59475	0.521393	-0.521393
						0	2.91133	JL121323_121323_ABP_127_30B.06658.06658.3	P	3.59475	0.137501	0.0901	//9	9//26	3.19825	1.78571	R.FTK[1153.65]ELNK.A	Sua7	1	TFIIB	FTKELNK	108	1//8	6//21	0.3965	0.5	R.ESIDK[1285.75]R.A	Sua7	1	TFIIB	ESIDKR	9	126.127	80355.6	127.131	112086	593085	87279.2	123685	1.41712	0.502961	0.502961
						-5	-25.1763	JL121323_121323_ABP_127_30B.06728.06728.4	P	0.65425	0.0281598	0.64	//9	7//33	0.59875	1.07143	R.FTK[1153.65]ELNK.A	Sua7	1	TFIIB	FTKELNK	108	//8	1//27	0.0555	0.0833333	R.ESIDK[1285.75]R.A	Sua7	1	TFIIB	ESIDKR	9	126.128	51664.3	127.131	73900.9	96966.2	56093.4	81548.5	1.4538	0.539826	0.539826
	9	TFIIB:108---TFIIB:98	5.6185	0.303322	-0.303322
						0	1.60072	JL121323_121323_ABP_127_1ug.06782.06782.4	NP	5.6185	0.232486	1.29e-08	//12	17//49	4.189	2.1	R.IGK[1285.75]GETTDM[147.04]R.F	Sua7	1	TFIIB	IGKGETTDMR	98	//9	8//30	1.4295	1.28571	R.FTK[1529.8]ELNK.A	Sua7	1	TFIIB	FTKELNK	108	126.128	69226.8	127.131	81766.6	319273	75371.4	90228.2	1.19711	0.25956	0.25956
						0	2.77849	JL121323_121323_ABP_127_30B.06513.06513.4	NP	5.4375	0.227311	1.46e-06	//12	17//49	4.245	2.15	R.IGK[1285.75]GETTDM[147.04]R.F	Sua7	1	TFIIB	IGKGETTDMR	98	//9	9//30	1.1925	1.28571	R.FTK[1529.8]ELNK.A	Sua7	1	TFIIB	FTKELNK	108	126.128	75704.7	127.131	94461.8	339128	82362.9	104237	1.26558	0.339801	0.339801
						0	2.70575	JL121323_121323_ABP_127_30B.06533.06533.5	NP	4.50025	0.217561	0.000114	//12	8//59	2.52025	1.25	R.IGK[1285.75]GETTDM[147.04]R.F	Sua7	1	TFIIB	IGKGETTDMR	98	//9	8//37	1.98	1.28571	R.FTK[1529.8]ELNK.A	Sua7	1	TFIIB	FTKELNK	108	126.127	51991.6	127.131	64494.1	163042	56568.9	71168.2	1.25808	0.331223	0.331223
						0	0.334425	JL121323_121323_ABP_127_30B.07203.07203.4	NP	4.36175	0.187812	1.56e-05	//12	14//49	3.29525	1.35	R.IGK[1285.75]GETTDMR.F	Sua7	1	TFIIB	IGKGETTDMR	98	//9	6//30	1.0665	1	R.FTK[1513.8]ELNK.A	Sua7	1	TFIIB	FTKELNK	108	126.127	76538.1	127.131	84214.7	130479	83406.9	92929.6	1.11417	0.155972	0.155972
						0	2.77267	JL121323_121323_ABP_127_1ug.06643.06643.5	NP	4.35725	0.188916	0.00744	//12	8//59	2.58475	1.1	R.IGK[1285.75]GETTDM[147.04]R.F	Sua7	1	TFIIB	IGKGETTDMR	98	//9	8//37	1.7725	1.07143	R.FTK[1529.8]ELNK.A	Sua7	1	TFIIB	FTKELNK	108	126.128	41859.3	127.131	55174.5	163807	45505.1	60884.2	1.33796	0.42004	0.42004
						0	0.990889	JL121323_121323_ABP_127_30B.06520.06520.3	P	4.06	0.143028	0.11	1//12	8//39	1.25725	0.6	R.IGK[1285.75]GETTDM[147.04]R.F	Sua7	1	TFIIB	IGKGETTDMR	98	//9	9//23	2.80275	1.78571	R.FTK[1529.8]ELNK.A	Sua7	1	TFIIB	FTKELNK	108	126.128	82468.6	127.131	115051	980392	89574	126957	1.41734	0.503184	0.503184
						0	1.01228	JL121323_121323_ABP_127_30B.07211.07211.4	P	3.98775	0.166049	0.2	//13	15//60	3.2545	1.90909	R.FTK[1529.8]ELNK[425.27]AQGK.N	Sua7	1	TFIIB	FTKELNKAQGK	108	//12	5//43	0.73325	0.35	R.IGK[1967.14]GETTDM[147.04]R.F	Sua7	1	TFIIB	IGKGETTDMR	98	126.127	91641	127.131	97447.6	683330	99906.3	107532	1.07633	0.106117	0.106117
						0	-1.07604	JL121323_121323_ABP_127_1ug.06630.06630.4	P	3.96725	0.16953	6.54e-06	//12	15//49	3.144	1.6	R.IGK[1285.75]GETTDM[147.04]R.F	Sua7	1	TFIIB	IGKGETTDMR	98	//9	5//30	0.82325	0.714286	R.FTK[1529.8]ELNK.A	Sua7	1	TFIIB	FTKELNK	108	126.127	49523.3	127.131	61668.8	144774	53880.4	68050.5	1.26299	0.336846	0.336846
						0	3.70953	JL121323_121323_ABP_127_50B.06540.06540.5	NP	3.747	0.173508	0.00434	//12	7//59	1.61975	0.9	R.IGK[1285.75]GETTDM[147.04]R.F	Sua7	1	TFIIB	IGKGETTDMR	98	//9	8//37	2.12725	1.28571	R.FTK[1529.8]ELNK.A	Sua7	1	TFIIB	FTKELNK	108	126.127	62942.5	127.131	77435.1	77435.1	68491.7	85448.3	1.24757	0.319124	0.319124
						0	3.30802	JL121323_121323_ABP_127_1ug.06803.06803.5	NP	3.3275	0.203107	0.00418	//12	7//59	1.56825	0.9	R.IGK[1285.75]GETTDM[147.04]R.F	Sua7	1	TFIIB	IGKGETTDMR	98	//9	10//37	1.75925	1.42857	R.FTK[1529.8]ELNK.A	Sua7	1	TFIIB	FTKELNK	108	126.127	30391.1	127.13	37745	56529.8	33066.1	41650.9	1.25963	0.332996	0.332996
						-2	15.0916	JL121323_121323_ABP_127_50B.06513.06513.4	P	3.1885	0.145328	0.00138	//12	12//49	2.339	1.25	R.IGK[1285.75]GETTDM[147.04]R.F	Sua7	1	TFIIB	IGKGETTDMR	98	//9	6//30	0.8495	1	R.FTK[1529.8]ELNK.A	Sua7	1	TFIIB	FTKELNK	108	126.128	142702	127.131	184463	255704	155175	203551	1.31175	0.391495	0.391495
						0	2.03483	JL121323_121323_ABP_127_50B.06519.06519.3	P	3.136	0.127371	0.29	//12	7//39	1.02775	0.45	R.IGK[1285.75]GETTDM[147.04]R.F	Sua7	1	TFIIB	IGKGETTDMR	98	//9	9//23	2.10825	1.78571	R.FTK[1529.8]ELNK.A	Sua7	1	TFIIB	FTKELNK	108	126.128	106554	127.131	135661	594845	115893	149699	1.2917	0.369274	0.369274
						0	1.60726	JL121323_121323_ABP_127_30B.07215.07215.3	P	2.21625	0.0869988	0.441	//12	4//39	0.749	0.3	R.IGK[1285.75]GETTDMR.F	Sua7	1	TFIIB	IGKGETTDMR	98	//9	6//23	1.46725	0.928571	R.FTK[1513.8]ELNK.A	Sua7	1	TFIIB	FTKELNK	108	126.128	67561.1	127.131	70449.5	297516	73671.5	77739.9	1.05522	0.0775493	0.0775493
	10	TFIIB:112---TFIIB:314	2.35325	-0.166644	0.166644
						1507	71.9771	JL121323_121323_ABP_127_30B.08301.08301.3	P	2.35325	0.0982445	0.538	1//16	2//52	0.06575	0.0769231	K.E[111.03]LNK[1671.92]AQGKNVM[147.04]DK.K	Sua7	1	TFIIB	ELNKAQGKNVMDK	112	//12	6//36	2.2875	0.85	K.SGYK[1879.01]ILYEHR.D	Sua7	1	TFIIB	SGYKILYEHR	314	126.128	120798	127.131	106539	181887	131959	117564	0.890913	-0.166644	-0.166644
	11	TFIIB:112---TFIIB:55	9.789	0.12916	-0.12916
						-2	2.87492	JL121323_121323_ABP_127_50B.30367.30367.5	P	9.789	0.281568	0.531	2//15	30//184	9.74225	1.73913	R.FSEGDVVC[160.03]ALC[160.03]GLVLSDK[1293.75]LVDTR.S	Sua7	1	TFIIB	FSEGDVVCALCGLVLSDKLVDTR	55	//10	3//40	0.04675	0.3125	K.ELNK[2959.52]AQGK.N	Sua7	1	TFIIB	ELNKAQGK	112	126.128	165364	127.131	216771	288053	179781	239203	1.33053	0.411997	0.411997
						0	0.503385	JL121323_121323_ABP_127_50B.33022.33022.5	P	7.32275	0.197002	0.163	//15	25//183	6.76225	1.3913	R.FSEGDVVC[160.03]ALC[160.03]GLVLSDK[2178.2]LVDTR.S	Sua7	1	TFIIB	FSEGDVVCALCGLVLSDKLVDTR	55	//15	6//94	0.5605	0.230769	K.ELNK[2959.52]AQGK[425.27]NVMDK.K	Sua7	1	TFIIB	ELNKAQGKNVMDK	112	126.127	106881	127.131	105583	337458	116619	116509	0.999059	-0.00135878	-0.00135878
						0	-4.40344	JL121323_121323_ABP_127_30B.32014.32014.5	P	7.0975	0.18557	0.182	1//15	21//183	6.645	1.21739	R.FSEGDVVC[160.03]ALC[160.03]GLVLSDK[2178.2]LVDTR.S	Sua7	1	TFIIB	FSEGDVVCALCGLVLSDKLVDTR	55	//15	6//89	0.4525	0.230769	K.ELNK[2959.52]AQGKNVMDK[425.27].K	Sua7	1	TFIIB	ELNKAQGKNVMDK	112	126.127	165596	127.131	161158	500427	180712	177835	0.984077	-0.0231575	-0.0231575
	12	TFIIB:112---TFIIB:98	4.52	1.00979	-1.00979
						0	3.90482	JL121323_121323_ABP_127_1ug.05451.05451.4	NP	4.52	0.197143	8.23e-05	//12	16//49	3.4055	1.65	R.IGK[1293.75]GETTDM[147.04]R.F	Sua7	1	TFIIB	IGKGETTDMR	98	//10	7//35	1.1145	0.9375	K.ELNK[1529.8]AQGK.N	Sua7	1	TFIIB	ELNKAQGK	112	126.128	26135.2	127.131	56010.4	164728	28149.3	61806.6	2.19567	1.13466	1.13466
						0	2.97876	JL121323_121323_ABP_127_1ug.05454.05454.5	NP	3.9985	0.224786	0.644	//12	6//59	2.2095	1	R.IGK[1293.75]GETTDM[147.04]R.F	Sua7	1	TFIIB	IGKGETTDMR	98	//10	8//43	1.789	1.3125	K.ELNK[1529.8]AQGK.N	Sua7	1	TFIIB	ELNKAQGK	112	126.128	30213.4	127.131	54663	203602	32664.4	60319.8	1.84665	0.884911	0.884911
	13	TFIIB:116---TFIIB:314	3.832	0.364503	-0.364503
						0	-2.20839	JL121323_121323_ABP_127_50B.06309.06309.5	P	3.832	0.165873	0.0996	//12	11//60	3.099	1.5	K.SGYK[1540.85]ILYEHR.D	Sua7	1	TFIIB	SGYKILYEHR	314	//12	5//55	0.733	0.5	K.AQGK[1671.92]NVM[147.04]DKK.D	Sua7	1	TFIIB	AQGKNVMDKK	116	126.128	80295	127.131	97000.2	97000.2	87395.7	107038	1.22475	0.292489	0.292489
						0	-0.265739	JL121323_121323_ABP_127_50B.06313.06313.4	P	2.255	0.0902957	0.335	1//12	11//49	1.52875	0.9	K.SGYK[1540.85]ILYEHR.D	Sua7	1	TFIIB	SGYKILYEHR	314	//12	5//45	0.72625	0.5	K.AQGK[1671.92]NVM[147.04]DKK.D	Sua7	1	TFIIB	AQGKNVMDKK	116	126.128	84231.3	127.131	112281	225864	91552.1	123901	1.35333	0.436517	0.436517
	14	TFIIB:116---TFIIB:55	8.9925	0.0728084	-0.0728084
						0	5.88634	JL121323_121323_ABP_127_30B.28677.28677.5	P	8.9925	0.292097	0.0185	//15	27//183	8.926	1.54348	R.FSEGDVVC[160.03]ALC[160.03]GLVLSDK[1412.75]LVDTR.S	Sua7	1	TFIIB	FSEGDVVCALCGLVLSDKLVDTR	55	//11	2//47	0.0665	0.111111	K.AQGK[2959.52]NVM[147.04]DK.K	Sua7	1	TFIIB	AQGKNVMDK	116	126.128	238349	127.131	269821	269821	259647	297743	1.14672	0.197514	0.197514
						-1	0.715572	JL121323_121323_ABP_127_70B.28413.28413.5	P	7.70375	0.197773	0.0151	2//15	25//183	7.35175	1.41304	R.FSEGDVVC[160.03]ALC[160.03]GLVLSDK[2178.2]LVDTR.S	Sua7	1	TFIIB	FSEGDVVCALCGLVLSDKLVDTR	55	//15	5//93	0.352	0.269231	K.ELNK[425.27]AQGK[2959.52]NVMDK.K	Sua7	1	TFIIB	ELNKAQGKNVMDK	116	126.128	62883.4	127.131	60003.7	105194	68638.4	66213.1	0.964667	-0.0518972	-0.0518972
	15	TFIIB:116---TFIIB:98	4.0205	0.648136	-0.648136
						0	3.38719	JL121323_121323_ABP_127_1ug.05023.05023.5	NP	4.0205	0.255904	0.238	//12	9//58	2.512	1.3	R.IGK[1412.75]GETTDM[147.04]R.F	Sua7	1	TFIIB	IGKGETTDMR	98	//11	7//50	1.5085	1	K.AQGK[1529.8]NVM[147.04]DK.K	Sua7	1	TFIIB	AQGKNVMDK	116	126.127	13136.4	127.131	14744.5	88834.4	14311.8	16270.3	1.13684	0.185033	0.185033
						0	3.83822	JL121323_121323_ABP_127_30B.04484.04484.4	P	1.005	0.120779	0.615	//12	4//47	0.4075	0.2	K.AQGK[1529.8]NVM[147.04]DKK.D	Sua7	1	TFIIB	AQGKNVMDKK	116	//12	3//47	0.5975	0.25	R.IGK[1540.85]GETTDM[147.04]R.F	Sua7	1	TFIIB	IGKGETTDMR	98	126.128	3559.98	127.131	7509.41	29597.7	3835.8	8286.51	2.16031	1.11124	1.11124
	16	TFIIB:121---TFIIB:55	13.2018	0.194321	-0.194321
						-1	8.25848	JL121323_121323_ABP_127_50B.30341.30341.5	P	13.2018	0.391813	0.0136	//15	37//186	13.08	2.19565	R.FSEGDVVC[160.03]ALC[160.03]GLVLSDK[1156.64]LVDTR.S	Sua7	1	TFIIB	FSEGDVVCALCGLVLSDKLVDTR	55	1//8	3//29	0.12175	0.416667	K.NVM[147.04]DK[2959.52]K.D	Sua7	1	TFIIB	NVMDKK	121	126.128	162913	127.131	206954	281546	177197	228371	1.2888	0.366024	0.366024
						0	5.51422	JL121323_121323_ABP_127_30B.29093.29093.5	P	13.1182	0.383748	0.00616	2//15	42//186	12.9117	2.45652	R.FSEGDVVC[160.03]ALC[160.03]GLVLSDK[1156.64]LVDTR.S	Sua7	1	TFIIB	FSEGDVVCALCGLVLSDKLVDTR	55	//8	4//29	0.2065	0.75	K.NVM[147.04]DK[2959.52]K.D	Sua7	1	TFIIB	NVMDKK	121	126.128	173159	127.131	220507	403032	188334	243326	1.29199	0.369593	0.369593
						0	0.315462	JL121323_121323_ABP_127_30B.29066.29066.5	P	11.5705	0.32638	0.0125	1//15	35//186	11.5117	2.21739	R.FSEGDVVC[160.03]ALC[160.03]GLVLSDK[1156.64]LVDTR.S	Sua7	1	TFIIB	FSEGDVVCALCGLVLSDKLVDTR	55	//8	3//29	0.05875	0.25	K.NVM[147.04]DK[2959.52]K.D	Sua7	1	TFIIB	NVMDKK	121	126.127	213770	127.131	254707	407800	232717	281065	1.20775	0.272325	0.272325
						-2	3.33245	JL121323_121323_ABP_127_70B.26540.26540.5	P	11.5505	0.346435	1.04e-10	//15	31//186	11.0668	2	R.FSEGDVVC[160.03]ALC[160.03]GLVLSDK[1156.64]LVDTR.S	Sua7	1	TFIIB	FSEGDVVCALCGLVLSDKLVDTR	55	1//8	5//29	0.48375	0.916667	K.NVM[147.04]DK[2959.52]K.D	Sua7	1	TFIIB	NVMDKK	121	126.128	53959.3	127.131	55198.9	82651.1	58852.5	60911	1.03498	0.0495998	0.0495998
						0	3.75156	JL121323_121323_ABP_127_30B.30036.30036.5	P	11.0282	0.304324	0.647	3//15	40//186	10.947	2.17391	R.FSEGDVVC[160.03]ALC[160.03]GLVLSDK[1140.64]LVDTR.S	Sua7	1	TFIIB	FSEGDVVCALCGLVLSDKLVDTR	55	//8	1//29	0.08125	0.0833333	K.NVMDK[2959.52]K.D	Sua7	1	TFIIB	NVMDKK	121	126.128	156582	127.131	145963	646065	170954	161068	0.942173	-0.0859367	-0.0859367
	17	TFIIB:122---TFIIB:98	5.8065	0.200006	-0.200006
						0	0.279173	JL121323_121323_ABP_127_1ug.07585.07585.4	P	5.8065	0.21103	0.742	1//12	16//58	5.28275	1.95455	K.K[1529.8]DNEVQAAFAK.I	Sua7	1	TFIIB	KDNEVQAAFAK	122	//12	5//46	0.52375	0.45	R.IGK[1626.88]GETTDM[147.04]R.F	Sua7	1	TFIIB	IGKGETTDMR	98	126.127	37274.6	127.131	42268.4	80330.4	40604.5	46642.5	1.1487	0.200006	0.200006
	18	TFIIB:132---TFIIB:132	7.56925	0.194283	-0.194283
						0	11.2902	JL121323_121323_ABP_127_50B.31153.31153.6	N	7.56925	0.20413		//17	13//128	5.0865	0.97619	K.DNEVQAAFAK[3282.78]ITMLC[160.03]DAAELPK.I	Sua7	1	TFIIB	DNEVQAAFAKITMLCDAAELPK	132	2//16	13//133	2.48275	0.630435	K.K[2841.51]DNEVQAAFAK[425.27]ITM[147.04]LC[160.03]DAAELPK.I	Sua7	1	TFIIB	KDNEVQAAFAKITMLCDAAELPK	132	126.128	151004	127.131	170565	304582	164502	188216	1.14416	0.194283	0.194283
	19	TFIIB:132---TFIIB:33	7.60625	0.117792	-0.117792
						-1	5.00522	JL121323_121323_ABP_127_30B.28564.28564.4	N	7.60625	0.209541		//11	6//39	0.9295	0.6875	K.VYPPK[2857.46]IVER.F	Sua7	1	TFIIB	VYPPKIVER	33	//17	22//128	6.67675	1.40476	K.DNEVQAAFAK[1506.92]ITM[147.04]LC[160.03]DAAELPK.I	Sua7	1	TFIIB	DNEVQAAFAKITMLCDAAELPK	132	126.127	369869	127.131	379160	435202	403400	418397	1.03718	0.0526613	0.0526613
						0	3.86395	JL121323_121323_ABP_127_50B.29971.29971.5	P	6.60875	0.219651	0.546	//17	20//171	6.0915	1.18182	K.DNEVQAAFAK[1506.9]ITM[147.04]LC[160.03]DAAELPK.I	Sua7	1	TFIIB	DNEVQAAFAKITMLCDAAELPK	132	1//11	6//48	0.51725	0.333333	K.VYPPK[2857.44]IVER.F	Sua7	1	TFIIB	VYPPKIVER	33	126.127	184005	127.131	206118	206118	200474	227447	1.13455	0.182117	0.182117
						0	7.53022	JL121323_121323_ABP_127_30B.28682.28682.5	NP	6.48	0.202636	0.0483	//17	22//171	5.7185	1.27273	K.DNEVQAAFAK[1506.9]ITM[147.04]LC[160.03]DAAELPK.I	Sua7	1	TFIIB	DNEVQAAFAKITMLCDAAELPK	132	1//11	7//48	0.7615	0.5	K.VYPPK[2857.44]IVER.F	Sua7	1	TFIIB	VYPPKIVER	33	126.127	221106	127.131	232751	269102	241076	256837	1.06538	0.0913623	0.0913623
						0	4.42186	JL121323_121323_ABP_127_30B.28639.28639.5	P	6.233	0.184703	0.0892	//17	22//171	5.59875	1.25	K.DNEVQAAFAK[1506.9]ITM[147.04]LC[160.03]DAAELPK.I	Sua7	1	TFIIB	DNEVQAAFAKITMLCDAAELPK	132	//11	6//48	0.63425	0.444444	K.VYPPK[2857.44]IVER.F	Sua7	1	TFIIB	VYPPKIVER	33	126.127	196402	127.131	214487	240186	214047	236682	1.10575	0.145026	0.145026
	20	TFIIB:132---TFIIB:55	3.251	0.328678	-0.328678
						0	-1.17669	JL121323_121323_ABP_127_30B.33336.33336.5	P	3.251	0.0670835	0.73	//13	8//198	0.65225	0.2	K.DNEVQAAFAK[2959.52]ITM[147.04]LC[160.03]DAAELPKIVK.D	Sua7	1	TFIIB	DNEVQAAFAKITMLCDAAELPKIVK	132	//15	16//183	2.59875	0.608696	R.FSEGDVVC[160.03]ALC[160.03]GLVLSDK[3197.69]LVDTR.S	Sua7	1	TFIIB	FSEGDVVCALCGLVLSDKLVDTR	55	126.127	46963.4	127.131	58155.5	171386	51099.3	64173.6	1.25586	0.328678	0.328678
	21	TFIIB:132---TFIIB:9	11.6463	0.0408172	-0.0408172
						0	-1.09297	JL121323_121323_ABP_127_30B.28086.28086.4	P	11.6463	0.366142	0.0179	//17	28//128	11.5928	1.90909	K.DNEVQAAFAK[1153.65]ITM[147.04]LC[160.03]DAAELPK.I	Sua7	1	TFIIB	DNEVQAAFAKITMLCDAAELPK	132	//8	2//23	0.0535	0.166667	R.ESIDK[2857.44]R.A	Sua7	1	TFIIB	ESIDKR	9	126.127	426484	127.131	428010	428010	465259	472302	1.01514	0.0216739	0.0216739
						-2	2.7703	JL121323_121323_ABP_127_70B.25732.25732.4	P	11.576	0.331809	1.13e-05	//17	31//128	11.4545	2.11364	K.DNEVQAAFAK[1153.65]ITM[147.04]LC[160.03]DAAELPK.I	Sua7	1	TFIIB	DNEVQAAFAKITMLCDAAELPK	132	//8	3//23	0.1215	0.25	R.ESIDK[2857.44]R.A	Sua7	1	TFIIB	ESIDKR	9	126.127	148883	127.131	152474	152474	162382	168253	1.03616	0.05124	0.05124
						0	1.9587	JL121323_121323_ABP_127_30B.28248.28248.5	P	10.9085	0.408926	0.0875	//17	30//171	10.9085	2.27273	K.DNEVQAAFAK[1153.65]ITM[147.04]LC[160.03]DAAELPK.I	Sua7	1	TFIIB	DNEVQAAFAKITMLCDAAELPK	132	//8	//29	0	0	R.ESIDK[2857.44]R.A	Sua7	1	TFIIB	ESIDKR	9	126.128	150439	127.131	154790	352330	164070	170808	1.04107	0.0580669	0.0580669
						-2	10.9885	JL121323_121323_ABP_127_50B.29272.29272.4	P	10.4585	0.300678	0.296	//17	29//128	10.4008	1.95455	K.DNEVQAAFAK[1153.65]ITM[147.04]LC[160.03]DAAELPK.I	Sua7	1	TFIIB	DNEVQAAFAKITMLCDAAELPK	132	//8	2//23	0.05775	0.166667	R.ESIDK[2857.44]R.A	Sua7	1	TFIIB	ESIDKR	9	126.128	365654	127.131	381419	381419	398723	420889	1.05559	0.0780529	0.0780529
						-4	12.8148	JL121323_121323_ABP_127_30B.28003.28003.4	P	9.96975	0.281604	0.531	//17	26//128	9.908	1.84091	K.DNEVQAAFAK[1153.65]ITM[147.04]LC[160.03]DAAELPK.I	Sua7	1	TFIIB	DNEVQAAFAKITMLCDAAELPK	132	//8	2//23	0.06175	0.166667	R.ESIDK[2857.44]R.A	Sua7	1	TFIIB	ESIDKR	9	126.127	418929	127.131	425835	425835	456951	469902	1.02834	0.040321	0.040321
						0	1.25629	JL121323_121323_ABP_127_30B.28117.28117.5	P	9.183	0.362113	0.421	//17	28//171	9.183	2.02273	K.DNEVQAAFAK[1153.65]ITM[147.04]LC[160.03]DAAELPK.I	Sua7	1	TFIIB	DNEVQAAFAKITMLCDAAELPK	132	//8	//29	0	0	R.ESIDK[2857.44]R.A	Sua7	1	TFIIB	ESIDKR	9	126.128	135481	127.131	131681	140315	147850	145308	0.982805	-0.0250234	-0.0250234
						-1	2.32747	JL121323_121323_ABP_127_50B.29487.29487.5	P	6.33125	0.224321	0.0425	//17	25//171	6.33125	1.47727	K.DNEVQAAFAK[1153.65]ITM[147.04]LC[160.03]DAAELPK.I	Sua7	1	TFIIB	DNEVQAAFAKITMLCDAAELPK	132	//8	//29	0	0	R.ESIDK[2857.44]R.A	Sua7	1	TFIIB	ESIDKR	9	126.128	121627	127.131	125430	125430	132644	138410	1.04347	0.0613891	0.0613891
	22	TFIIB:132---TFIIB:98	14.0425	0.0529541	-0.0529541
						0	4.22661	JL121323_121323_ABP_127_70B.25478.25478.5	P	14.0425	0.501187	3.92e-20	//17	31//171	13.3238	2.25	K.DNEVQAAFAK[1529.8]ITM[147.04]LC[160.03]DAAELPK.I	Sua7	1	TFIIB	DNEVQAAFAKITMLCDAAELPK	132	//12	5//53	0.71875	0.45	R.IGK[2857.44]GETTDM[147.04]R.F	Sua7	1	TFIIB	IGKGETTDMR	98	126.128	95629	127.131	97131.3	159265	104309	107183	1.02755	0.0392045	0.0392045
						-2	9.52247	JL121323_121323_ABP_127_30B.27869.27869.4	P	14.016	0.450255	0.0649	//17	32//128	13.693	2.34091	K.DNEVQAAFAK[1529.8]ITM[147.04]LC[160.03]DAAELPK.I	Sua7	1	TFIIB	DNEVQAAFAKITMLCDAAELPK	132	//12	5//43	0.323	0.35	R.IGK[2857.44]GETTDM[147.04]R.F	Sua7	1	TFIIB	IGKGETTDMR	98	126.127	343612	127.131	351946	351946	374766	388366	1.03629	0.0514272	0.0514272
						-2	10.6633	JL121323_121323_ABP_127_50B.29126.29126.4	P	13.0905	0.420815	0.000293	//17	30//128	12.7018	2.15909	K.DNEVQAAFAK[1529.8]ITM[147.04]LC[160.03]DAAELPK.I	Sua7	1	TFIIB	DNEVQAAFAKITMLCDAAELPK	132	//12	5//43	0.38875	0.35	R.IGK[2857.44]GETTDM[147.04]R.F	Sua7	1	TFIIB	IGKGETTDMR	98	126.127	347539	127.131	362778	362778	378967	400320	1.05635	0.079082	0.079082
						0	7.87108	JL121323_121323_ABP_127_30B.27787.27787.5	NP	12.4175	0.396213	6.51e-06	//17	28//171	11.0623	2.02273	K.DNEVQAAFAK[1529.8]ITM[147.04]LC[160.03]DAAELPK.I	Sua7	1	TFIIB	DNEVQAAFAKITMLCDAAELPK	132	//12	6//53	1.35525	0.85	R.IGK[2857.44]GETTDM[147.04]R.F	Sua7	1	TFIIB	IGKGETTDMR	98	126.127	234492	127.131	247523	279582	255664	273138	1.06835	0.0953836	0.0953836
						-2	9.3957	JL121323_121323_ABP_127_50B.28851.28851.4	P	12.372	0.393274	0.00363	1//17	30//128	12.02	2.02273	K.DNEVQAAFAK[1529.8]ITM[147.04]LC[160.03]DAAELPK.I	Sua7	1	TFIIB	DNEVQAAFAKITMLCDAAELPK	132	//12	5//43	0.352	0.35	R.IGK[2857.44]GETTDM[147.04]R.F	Sua7	1	TFIIB	IGKGETTDMR	98	126.127	284673	127.131	294869	294869	310444	325383	1.04812	0.0678065	0.0678065
						0	5.99828	JL121323_121323_ABP_127_50B.29144.29144.5	N	12.1635	0.402259		//12	6//53	1.3965	0.944444	R.IGK[2857.47]GETTDM[147.04]R.F	Sua7	1	TFIIB	IGKGETTDMR	98	//17	28//171	10.767	2.11905	K.DNEVQAAFAK[1529.82]ITM[147.04]LC[160.03]DAAELPK.I	Sua7	1	TFIIB	DNEVQAAFAKITMLCDAAELPK	132	126.127	192957	127.131	200600	200600	210416	221358	1.052	0.073139	0.073139
						-1	5.40263	JL121323_121323_ABP_127_30B.27824.27824.4	P	12.1505	0.363363	0.0022	//17	29//128	11.7745	1.88636	K.DNEVQAAFAK[1529.8]ITM[147.04]LC[160.03]DAAELPK.I	Sua7	1	TFIIB	DNEVQAAFAKITMLCDAAELPK	132	//12	4//43	0.376	0.3	R.IGK[2857.44]GETTDM[147.04]R.F	Sua7	1	TFIIB	IGKGETTDMR	98	126.127	351238	127.13	365715	365715	383011	403560	1.05365	0.0753973	0.0753973
						-2	0.124899	JL121323_121323_ABP_127_70B.25581.25581.5	N	11.5068	0.3637		//12	8//53	1.047	1.05556	R.IGK[2857.44]GETTDM[147.04]R.F	Sua7	1	TFIIB	IGKGETTDMR	98	//17	29//171	10.4597	2.2381	K.DNEVQAAFAK[1529.79]ITM[147.04]LC[160.03]DAAELPK.I	Sua7	1	TFIIB	DNEVQAAFAKITMLCDAAELPK	132	126.127	69162.3	127.131	73478.8	73478.8	75401	81082.6	1.07535	0.10481	0.10481
						-1	2.86734	JL121323_121323_ABP_127_30B.27519.27519.4	P	11.3283	0.343817	0.117	//17	26//128	10.9548	1.79545	K.DNEVQAAFAK[1529.8]ITM[147.04]LC[160.03]DAAELPK.I	Sua7	1	TFIIB	DNEVQAAFAKITMLCDAAELPK	132	1//12	5//43	0.3735	0.35	R.IGK[2857.44]GETTDM[147.04]R.F	Sua7	1	TFIIB	IGKGETTDMR	98	126.127	320818	127.131	318863	320818	350024	351860	1.00525	0.00754992	0.00754992
						-1	8.12806	JL121323_121323_ABP_127_D.25002.25002.4	P	11.298	0.358365	0.0958	//17	28//128	10.749	2.11364	K.DNEVQAAFAK[1529.8]ITM[147.04]LC[160.03]DAAELPK.I	Sua7	1	TFIIB	DNEVQAAFAKITMLCDAAELPK	132	//12	5//43	0.549	0.5	R.IGK[2857.44]GETTDM[147.04]R.F	Sua7	1	TFIIB	IGKGETTDMR	98	126.127	170321	127.131	174040	174040	185769	192050	1.03381	0.0479779	0.0479779
						0	5.73193	JL121323_121323_ABP_127_70B.25420.25420.5	P	11.2285	0.362444	4.46e-21	//17	28//171	10.3247	2.02273	K.DNEVQAAFAK[1529.8]ITM[147.04]LC[160.03]DAAELPK.I	Sua7	1	TFIIB	DNEVQAAFAKITMLCDAAELPK	132	//12	5//53	0.90375	0.45	R.IGK[2857.44]GETTDM[147.04]R.F	Sua7	1	TFIIB	IGKGETTDMR	98	126.128	84310.7	127.131	82888.6	91230.2	91997.1	91466.2	0.99423	-0.00834838	-0.00834838
						-1	2.10675	JL121323_121323_ABP_127_50B.28831.28831.4	P	11.1088	0.312509	0.156	//17	29//128	10.683	1.81818	K.DNEVQAAFAK[1529.8]ITM[147.04]LC[160.03]DAAELPK.I	Sua7	1	TFIIB	DNEVQAAFAKITMLCDAAELPK	132	//12	4//43	0.42575	0.3	R.IGK[2857.44]GETTDM[147.04]R.F	Sua7	1	TFIIB	IGKGETTDMR	98	126.127	288984	127.131	303510	303510	315095	334918	1.06291	0.0880249	0.0880249
						0	5.96962	JL121323_121323_ABP_127_50B.29150.29150.5	P	10.8238	0.362029	0.00049	//17	26//171	10.1125	1.86364	K.DNEVQAAFAK[1529.8]ITM[147.04]LC[160.03]DAAELPK.I	Sua7	1	TFIIB	DNEVQAAFAKITMLCDAAELPK	132	//12	4//53	0.71125	0.3	R.IGK[2857.44]GETTDM[147.04]R.F	Sua7	1	TFIIB	IGKGETTDMR	98	126.128	205310	127.131	216900	216900	223845	239346	1.06925	0.0965972	0.0965972
						-1	6.06469	JL121323_121323_ABP_127_50B.28866.28866.5	NP	10.5815	0.353956	3.69e-06	//17	28//171	9.35925	1.86364	K.DNEVQAAFAK[1529.8]ITM[147.04]LC[160.03]DAAELPK.I	Sua7	1	TFIIB	DNEVQAAFAKITMLCDAAELPK	132	//12	7//53	1.22225	0.9	R.IGK[2857.44]GETTDM[147.04]R.F	Sua7	1	TFIIB	IGKGETTDMR	98	126.128	177017	127.131	175069	177017	193143	193185	1.00022	0.000317017	0.000317017
						-1	2.02408	JL121323_121323_ABP_127_30B.27872.27872.5	P	10.5375	0.335301	0.00251	//17	27//171	10.0032	1.88636	K.DNEVQAAFAK[1529.8]ITM[147.04]LC[160.03]DAAELPK.I	Sua7	1	TFIIB	DNEVQAAFAKITMLCDAAELPK	132	1//12	5//53	0.53425	0.35	R.IGK[2857.44]GETTDM[147.04]R.F	Sua7	1	TFIIB	IGKGETTDMR	98	126.128	211330	127.131	236267	253960	230250	260716	1.13232	0.179278	0.179278
						0	1.72646	JL121323_121323_ABP_127_70B.25363.25363.4	P	9.45575	0.268401	0.00558	//17	26//128	9.17025	1.65909	K.DNEVQAAFAK[1529.8]ITM[147.04]LC[160.03]DAAELPK.I	Sua7	1	TFIIB	DNEVQAAFAKITMLCDAAELPK	132	//12	4//43	0.2855	0.3	R.IGK[2857.44]GETTDM[147.04]R.F	Sua7	1	TFIIB	IGKGETTDMR	98	126.128	148782	127.131	156532	156532	162222	172731	1.06478	0.0905561	0.0905561
						-2	5.55862	JL121323_121323_ABP_127_30B.28753.28753.5	P	9.3735	0.274452	0.00117	//17	23//171	9.05725	1.61364	K.DNEVQAAFAK[1529.8]ITMLC[160.03]DAAELPK.I	Sua7	1	TFIIB	DNEVQAAFAKITMLCDAAELPK	132	//12	4//53	0.31625	0.3	R.IGK[2841.45]GETTDM[147.04]R.F	Sua7	1	TFIIB	IGKGETTDMR	98	126.127	268649	127.131	274127	274127	293019	302495	1.03234	0.0459147	0.0459147
						-1	6.06469	JL121323_121323_ABP_127_50B.28863.28863.5	P	8.242	0.268644	0.000358	//17	24//171	7.50275	1.47727	K.DNEVQAAFAK[1529.8]ITM[147.04]LC[160.03]DAAELPK.I	Sua7	1	TFIIB	DNEVQAAFAKITMLCDAAELPK	132	//12	6//53	0.73925	0.5	R.IGK[2857.44]GETTDM[147.04]R.F	Sua7	1	TFIIB	IGKGETTDMR	98	126.127	206526	127.131	194592	206526	225457	214729	0.952417	-0.0703349	-0.0703349
						-1	2.84621	JL121323_121323_ABP_127_70B.25338.25338.5	N	7.99025	0.250773		//12	6//53	1.11075	0.944444	R.IGK[2857.43]GETTDM[147.04]R.F	Sua7	1	TFIIB	IGKGETTDMR	98	//17	23//171	6.8795	1.42857	K.DNEVQAAFAK[1529.78]ITM[147.04]LC[160.03]DAAELPK.I	Sua7	1	TFIIB	DNEVQAAFAKITMLCDAAELPK	132	126.128	83251.4	127.131	82299.8	83251.4	90835.7	90816.5	0.999789	-0.000305108	-0.000305108
						-1	-3.0465	JL121323_121323_ABP_127_30B.27569.27569.5	P	7.87025	0.233034	0.00154	//17	26//171	7.34625	1.63636	K.DNEVQAAFAK[1529.8]ITM[147.04]LC[160.03]DAAELPK.I	Sua7	1	TFIIB	DNEVQAAFAKITMLCDAAELPK	132	1//12	6//53	0.524	0.5	R.IGK[2857.44]GETTDM[147.04]R.F	Sua7	1	TFIIB	IGKGETTDMR	98	126.128	269161	127.131	261509	269161	293738	288571	0.982409	-0.0256049	-0.0256049
						-2	-2.87219	JL121323_121323_ABP_127_30B.27564.27564.5	P	6.13675	0.17679	0.000431	//17	26//171	5.575	1.61364	K.DNEVQAAFAK[1529.8]ITM[147.04]LC[160.03]DAAELPK.I	Sua7	1	TFIIB	DNEVQAAFAKITMLCDAAELPK	132	2//12	7//53	0.56175	0.55	R.IGK[2857.44]GETTDM[147.04]R.F	Sua7	1	TFIIB	IGKGETTDMR	98	126.128	256854	127.131	252732	329282	280268	278886	0.99507	-0.00713015	-0.00713015
						-1	2.10675	JL121323_121323_ABP_127_50B.28823.28823.4	P	6.0165	0.181223	0.163	//17	20//128	5.852	1	K.DNEVQAAFAK[1529.8]ITM[147.04]LC[160.03]DAAELPK.I	Sua7	1	TFIIB	DNEVQAAFAKITMLCDAAELPK	132	//12	3//43	0.1645	0.15	R.IGK[2857.44]GETTDM[147.04]R.F	Sua7	1	TFIIB	IGKGETTDMR	98	126.127	273742	127.13	296750	296750	298363	327459	1.09752	0.134247	0.134247
	23	TFIIB:144---TFIIB:151	18.3322	0.0272936	-0.0272936
						0	0.407607	JL121323_121323_ABP_127_30B.30230.30230.5	P	18.3322	0.465032	0.000141	//13	45//200	17.8137	2.54	K.DNEVQAAFAK[425.27]ITM[147.04]LC[160.03]DAAELPK[1390.7]IVK.D	Sua7	1	TFIIB	DNEVQAAFAKITMLCDAAELPKIVK	144	//10	6//42	0.5185	1	K.DC[160.03]AK[3494.87]EAYK.L	Sua7	1	TFIIB	DCAKEAYK	151	126.128	295825	127.131	306120	540107	322609	337799	1.04708	0.0663772	0.0663772
						-1	6.16312	JL121323_121323_ABP_127_30B.30318.30318.4	P	16.417	0.370696	0.00291	//13	36//146	15.918	2.04	K.DNEVQAAFAK[425.27]ITM[147.04]LC[160.03]DAAELPK[1390.7]IVK.D	Sua7	1	TFIIB	DNEVQAAFAKITMLCDAAELPKIVK	144	//10	6//34	0.499	1	K.DC[160.03]AK[3494.87]EAYK.L	Sua7	1	TFIIB	DCAKEAYK	151	126.127	118292	127.131	132033	393133	128885	145696	1.13044	0.176881	0.176881
						-2	3.3119	JL121323_121323_ABP_127_30B.30188.30188.5	P	15.2165	0.376185	0.00557	//13	35//200	14.7082	1.88	K.DNEVQAAFAK[425.27]ITM[147.04]LC[160.03]DAAELPK[1390.7]IVK.D	Sua7	1	TFIIB	DNEVQAAFAKITMLCDAAELPKIVK	144	1//10	6//42	0.50825	0.8125	K.DC[160.03]AK[3494.87]EAYK.L	Sua7	1	TFIIB	DCAKEAYK	151	126.128	260486	127.131	258412	336355	284206	285153	1.00333	0.00480281	0.00480281
						0	2.12237	JL121323_121323_ABP_127_30B.30252.30252.4	P	14.4075	0.347566	0.468	//13	32//146	14.1738	1.8	K.DNEVQAAFAK[425.27]ITM[147.04]LC[160.03]DAAELPK[1390.7]IVK.D	Sua7	1	TFIIB	DNEVQAAFAKITMLCDAAELPKIVK	144	//10	5//34	0.23375	0.5625	K.DC[160.03]AK[3494.87]EAYK.L	Sua7	1	TFIIB	DCAKEAYK	151	126.127	135387	127.131	138951	403344	147658	153330	1.03841	0.0543784	0.0543784
						-3	8.65748	JL121323_121323_ABP_127_50B.31421.31421.5	P	13.615	0.343445	0.00104	//13	37//200	13.3837	1.94	K.DNEVQAAFAK[425.27]ITM[147.04]LC[160.03]DAAELPK[1390.7]IVK.D	Sua7	1	TFIIB	DNEVQAAFAKITMLCDAAELPKIVK	144	//10	4//42	0.23125	0.5625	K.DC[160.03]AK[3494.87]EAYK.L	Sua7	1	TFIIB	DCAKEAYK	151	126.128	202535	127.131	207307	308151	220900	228760	1.03558	0.0504415	0.0504415
						-2	0.786428	JL121323_121323_ABP_127_50B.31361.31361.5	P	13.09	0.326666	0.00632	//13	30//200	12.888	1.6	K.DNEVQAAFAK[425.27]ITM[147.04]LC[160.03]DAAELPK[1390.7]IVK.D	Sua7	1	TFIIB	DNEVQAAFAKITMLCDAAELPKIVK	144	//10	4//42	0.202	0.5	K.DC[160.03]AK[3494.87]EAYK.L	Sua7	1	TFIIB	DCAKEAYK	151	126.127	247414	127.131	237304	306393	270042	261861	0.969703	-0.0443845	-0.0443845
						0	2.11626	JL121323_121323_ABP_127_30B.30360.30360.6	P	12.2415	0.329817	0.0334	//13	31//200	11.8695	1.6	K.DNEVQAAFAK[425.27]ITM[147.04]LC[160.03]DAAELPK[1390.7]IVK.D	Sua7	1	TFIIB	DNEVQAAFAKITMLCDAAELPKIVK	144	//10	4//42	0.372	0.5	K.DC[160.03]AK[3494.87]EAYK.L	Sua7	1	TFIIB	DCAKEAYK	151	126.127	120151	127.131	114424	120151	131149	126265	0.962758	-0.0547546	-0.0547546
						-1	4.70091	JL121323_121323_ABP_127_50B.31386.31386.5	P	10.9645	0.276267	0.641	//13	27//200	10.838	1.48	K.DNEVQAAFAK[425.27]ITM[147.04]LC[160.03]DAAELPK[1390.7]IVK.D	Sua7	1	TFIIB	DNEVQAAFAKITMLCDAAELPKIVK	144	//10	3//42	0.1265	0.3125	K.DC[160.03]AK[3494.87]EAYK.L	Sua7	1	TFIIB	DCAKEAYK	151	126.128	247870	127.131	239212	395859	270522	263966	0.975766	-0.0353923	-0.0353923
	24	TFIIB:147---TFIIB:55	15.7922	0.239508	-0.239508
						0	3.63879	JL121323_121323_ABP_127_30B.29169.29169.4	P	15.7922	0.40058	0.0228	//15	38//138	15.5087	2.58696	R.FSEGDVVC[160.03]ALC[160.03]GLVLSDK[1239.71]LVDTR.S	Sua7	1	TFIIB	FSEGDVVCALCGLVLSDKLVDTR	55	1//9	4//27	0.2835	0.285714	K.IVK[2959.52]DC[160.03]AK.E	Sua7	1	TFIIB	IVKDCAK	147	126.127	354525	127.131	402954	547025	386184	444653	1.1514	0.203391	0.203391
						-1	-3.62438	JL121323_121323_ABP_127_D.26372.26372.4	P	14.8503	0.424687	6.07e-09	//15	32//138	14.4343	2.13043	R.FSEGDVVC[160.03]ALC[160.03]GLVLSDK[1239.71]LVDTR.S	Sua7	1	TFIIB	FSEGDVVCALCGLVLSDKLVDTR	55	//9	5//27	0.416	0.5	K.IVK[2959.52]DC[160.03]AK.E	Sua7	1	TFIIB	IVKDCAK	147	126.127	233129	127.131	266147	374236	253934	293689	1.15656	0.209836	0.209836
						-1	5.13444	JL121323_121323_ABP_127_50B.30363.30363.5	P	11.6948	0.322658	0.000409	//15	36//185	11.3095	2.13043	R.FSEGDVVC[160.03]ALC[160.03]GLVLSDK[1239.71]LVDTR.S	Sua7	1	TFIIB	FSEGDVVCALCGLVLSDKLVDTR	55	//9	5//34	0.38525	0.928571	K.IVK[2959.52]DC[160.03]AK.E	Sua7	1	TFIIB	IVKDCAK	147	126.128	218543	127.131	267998	384449	237821	295732	1.2435	0.314411	0.314411
						-1	-2.44524	JL121323_121323_ABP_127_70B.26579.26579.5	P	10.12	0.289056	7.36e-11	//15	36//185	9.88325	2.21739	R.FSEGDVVC[160.03]ALC[160.03]GLVLSDK[1239.71]LVDTR.S	Sua7	1	TFIIB	FSEGDVVCALCGLVLSDKLVDTR	55	//9	4//34	0.23675	0.642857	K.IVK[2959.52]DC[160.03]AK.E	Sua7	1	TFIIB	IVKDCAK	147	126.128	104636	127.131	129197	294074	113855	142566	1.25217	0.324432	0.324432
						-2	0.569971	JL121323_121323_ABP_127_50B.30345.30345.5	P	8.97275	0.276327	0.000788	//15	30//185	8.7765	1.67391	R.FSEGDVVC[160.03]ALC[160.03]GLVLSDK[1239.71]LVDTR.S	Sua7	1	TFIIB	FSEGDVVCALCGLVLSDKLVDTR	55	//9	4//34	0.19625	0.428571	K.IVK[2959.52]DC[160.03]AK.E	Sua7	1	TFIIB	IVKDCAK	147	126.128	201071	127.131	219653	284371	219135	242384	1.10609	0.14547	0.14547
	25	TFIIB:147---TFIIB:9	2.43275	0.358507	-0.358507
						0	1.5533	JL121323_121323_ABP_127_30B.05390.05390.4	P	2.43275	0.126413	0.686	//9	7//32	1.7125	1.21429	K.IVK[1153.65]DC[160.03]AK.E	Sua7	1	TFIIB	IVKDCAK	147	//8	6//27	0.72025	1.16667	R.ESIDK[1239.71]R.A	Sua7	1	TFIIB	ESIDKR	9	126.127	51226.1	127.131	64740.7	103824	55721.4	71440.3	1.2821	0.358507	0.358507
	26	TFIIB:147---TFIIB:98	5.651	0.175327	-0.175327
						0	2.47189	JL121323_121323_ABP_127_1ug.05476.05476.4	NP	5.651	0.253806	4.59e-05	//12	18//49	4.484	2.45	R.IGK[1239.71]GETTDM[147.04]R.F	Sua7	1	TFIIB	IGKGETTDMR	98	//9	6//29	1.167	1	K.IVK[1529.8]DC[160.03]AK.E	Sua7	1	TFIIB	IVKDCAK	147	126.127	42335.5	127.131	45317.6	174264	46150.1	50007.2	1.08358	0.115801	0.115801
						0	4.93833	JL121323_121323_ABP_127_1ug.05491.05491.5	NP	2.8655	0.154458	0.199	1//12	9//59	1.485	1.15	R.IGK[1239.71]GETTDM[147.04]R.F	Sua7	1	TFIIB	IGKGETTDMR	98	//9	7//36	1.3805	1.21429	K.IVK[1529.8]DC[160.03]AK.E	Sua7	1	TFIIB	IVKDCAK	147	126.127	16164.8	127.131	18772.9	33271.2	17603.5	20715.6	1.17679	0.234853	0.234853
	27	TFIIB:151---TFIIB:166	1.47575	0.125154	-0.125154
						-1	5.32888	JL121323_121323_ABP_127_30B.28929.28929.5	P	1.47575	0.0345751	0.768	//14	6//133	0.236	0.176471	K.IVK[425.27]DC[160.03]AK[2230.17]EAYKLC[160.03]HDEK.T	Sua7	1	TFIIB	IVKDCAKEAYKLCHDEK	151	//17	8//123	1.23975	0.382353	K.GK[2810.46]SMESIMAASILIGC[160.03]R.R	Sua7	1	TFIIB	GKSMESIMAASILIGCR	166	126.128	197823	127.131	213118	298822	215631	235172	1.09062	0.125154	0.125154
	28	TFIIB:151---TFIIB:314	6.17025	0.337341	-0.337341
						0	3.14195	JL121323_121323_ABP_127_30B.07765.07765.4	P	6.17025	0.267719	0.000316	//12	17//50	5.4875	2.25	K.SGYK[1390.7]ILYEHR.D	Sua7	1	TFIIB	SGYKILYEHR	314	//10	5//34	0.68275	0.8125	K.DC[160.03]AK[1671.92]EAYK.L	Sua7	1	TFIIB	DCAKEAYK	151	126.128	62660.5	127.131	78054.4	155961	68173.1	86131.7	1.26343	0.337341	0.337341
	29	TFIIB:151---TFIIB:55	14.1487	0.267276	-0.267276
						0	-0.513253	JL121323_121323_ABP_127_30B.30000.30000.5	P	14.1487	0.403403	0.000185	//15	40//184	13.2715	2.41304	R.FSEGDVVC[160.03]ALC[160.03]GLVLSDK[1390.7]LVDTR.S	Sua7	1	TFIIB	FSEGDVVCALCGLVLSDKLVDTR	55	//10	5//42	0.87725	0.8125	K.DC[160.03]AK[2959.52]EAYK.L	Sua7	1	TFIIB	DCAKEAYK	151	126.128	237878	127.131	286903	591687	258920	316593	1.22274	0.290123	0.290123
						0	-0.513253	JL121323_121323_ABP_127_30B.29994.29994.5	P	12.91	0.38337	0.00021	//15	39//184	12.1055	2.21739	R.FSEGDVVC[160.03]ALC[160.03]GLVLSDK[1390.7]LVDTR.S	Sua7	1	TFIIB	FSEGDVVCALCGLVLSDKLVDTR	55	//10	4//42	0.8045	0.75	K.DC[160.03]AK[2959.52]EAYK.L	Sua7	1	TFIIB	DCAKEAYK	151	126.128	218079	127.131	254929	409769	237468	281310	1.18462	0.244428	0.244428
	30	TFIIB:151---TFIIB:9	3.814	0.425605	-0.425605
						0	4.92803	JL121323_121323_ABP_127_30B.05714.05714.3	P	3.814	0.16565	0.589	//10	11//32	3.48925	1.8125	K.DC[160.03]AK[1153.65]EAYK.L	Sua7	1	TFIIB	DCAKEAYK	151	//8	3//21	0.32475	0.25	R.ESIDK[1390.7]R.A	Sua7	1	TFIIB	ESIDKR	9	126.127	54488.5	127.13	80024.2	286011	59134.5	88305.4	1.4933	0.578501	0.578501
						0	4.79989	JL121323_121323_ABP_127_30B.05719.05719.4	P	1.4465	0.0708878	0.427	1//10	7//40	1.28025	0.9375	K.DC[160.03]AK[1153.65]EAYK.L	Sua7	1	TFIIB	DCAKEAYK	151	//8	3//27	0.16625	0.25	R.ESIDK[1390.7]R.A	Sua7	1	TFIIB	ESIDKR	9	126.128	62311.5	127.131	74263.7	80113	67834.2	81948.7	1.20807	0.27271	0.27271
	31	TFIIB:151---TFIIB:98	3.777	0.0213835	-0.0213835
						0	2.1099	JL121323_121323_ABP_127_1ug.05826.05826.5	N	3.777	0.175275		//10	7//43	1.485	1.21429	K.DC[160.03]AK[1529.8]EAYK.L	Sua7	1	TFIIB	DCAKEAYK	151	//12	7//58	2.292	1.33333	R.IGK[1390.7]GETTDM[147.04]R.F	Sua7	1	TFIIB	IGKGETTDMR	98	126.128	42905.2	127.131	43050.2	89588.6	46806.2	47505.1	1.01493	0.0213835	0.0213835
	32	TFIIB:155---TFIIB:314	5.3515	0.370741	-0.370741
						0	3.39699	JL121323_121323_ABP_127_50B.07984.07984.4	NP	5.3515	0.255423	0.0631	//12	6//47	1.215	0.7	K.EAYK[1671.92]LC[160.03]HDEK.T	Sua7	1	TFIIB	EAYKLCHDEK	155	//12	14//47	4.1365	1.85	K.SGYK[1698.85]ILYEHR.D	Sua7	1	TFIIB	SGYKILYEHR	314	126.127	297042	127.131	371363	905546	323158	409793	1.26809	0.342658	0.342658
						-1	5.6357	JL121323_121323_ABP_127_50B.07991.07991.4	NP	4.97625	0.230681	0.266	//12	7//47	1.2415	0.75	K.EAYK[1671.92]LC[160.03]HDEK.T	Sua7	1	TFIIB	EAYKLCHDEK	155	//12	13//47	3.73475	1.7	K.SGYK[1698.85]ILYEHR.D	Sua7	1	TFIIB	SGYKILYEHR	314	126.128	279067	127.131	376763	903828	303264	415751	1.37092	0.455149	0.455149
						0	2.57432	JL121323_121323_ABP_127_50B.08005.08005.5	P	4.1205	0.190742	0.0506	//12	5//58	0.5725	0.6	K.EAYK[1671.92]LC[160.03]HDEK.T	Sua7	1	TFIIB	EAYKLCHDEK	155	//12	10//58	3.548	1.2	K.SGYK[1698.85]ILYEHR.D	Sua7	1	TFIIB	SGYKILYEHR	314	126.127	164812	127.131	202109	202109	179350	223024	1.24351	0.314418	0.314418
	33	TFIIB:155---TFIIB:33	1.19775	0.127693	-0.127693
[truncated: 428 more rows]
